# Supplementary material for: Proteomics of colorectal tumors identifies the role of CAVIN1 in tumor formation and progression
Source: Research Square preprint supplement (doi:10.21203/rs.3.rs-3817695/v1), 2024-01-11
Supplement: Supplementary file 1 [file 5426c9f5c3678d592f62e280.xlsx]

## Sheet: Legend
TABLE S2A	Metadata associated to each sample from 1st COHORT.
Column name	Description
Sample	Proteomics Id
batch	experimental batch
digestion	digestion procedure: in-sol (in solution digestion), PAC (protein aggregation capture)
MSI	MSI status: MSI (Microsatellite instable), MSS (microsatellite stable)
TNM	Tumor stage
RFS	Relapse free survival event: 1 (recurrence), 0 (no recurrence)
PROT_All_k4	Proteomics subtype classification
CMScaller_RNA	RNASeq based CMS classification (PMID: 29192179)
NTP_prediction	Nearest template prediction of epithelial subtype (PMID: 35773407)
StromalScore	Stromal Score from ESTIMATE algorithm (PMID: 24113773)
ImmuneScore	Immune Score from ESTIMATE algorithm (PMID: 24113773)
TumorPurity	Tumor Purity from ESTIMATE algorithm (PMID: 24113773)
TABLE S2B	Log2 intensities of Protein Coding Genes from 1st COHORT samples, including ANOVA and Hazard Ratio Analysis.
Column name	Description
Gene.name	Protein coding gene names
ANOVA-based protein clusters	Protein clusters after ANOVA analysis (not-sig: not significant in ANOVA)
Description-cluster	Molecular category assigned to each cluster
Limma FC (RFS yes vs no) in SUBTYPE 1	Fold change between samples with relapse and non-relapse using limma moderated t-test in protein markers of SUBTYPE 1.
P-value (limma RFS yes vs no)	p-value from limma moderated t-test comparing relapse vs non-relapse in protein markers of SUBTYPE 1.
Hazard ratio in SUBTYPE 1	Hazard ratio (from Cox Proportional-Hazards model anlaysis) applied only to protein markers of SUBTYPE 1.
P-value (cox hr test) in SUBTYPE 1	p-value (from Cox Proportional-Hazards model anlaysis) applied only to protein marjers of SUBTYPE 1.
Prognostic for CRC (HPA)	Whether the protein was found as prognostic for unfavourable outcome in CRC in the Human Proteome Atlas data

## Sheet: S2A-Metadata Heatmap
Sample	batch	digestion	MSI	TNM	RFS	PROT_All_k4	CMScaller_RNA	NTP_prediction	StromalScore	ImmuneScore	TumorPurity
X165	4	PAC	MSS	III	0	1	CMS4	NA	651.497	1338.4	0.623893
X166	4	PAC	MSI	II	1	2	CMS1	NA	20.4516	-96.8617	0.828837
X167	4	PAC	MSI	III	1	4	CMS1	iCMS3	847.76	1180.73	0.619457
X169	4	PAC	MSS	III	1	2	CMS4	NA	160.962	206.95	0.79061
X170	4	PAC	MSI	III	0	4	CMS1	NA	151.808	405.32	0.7733
X171	4	PAC	MSS	III	0	4	NOT_SIG	NA	190.656	683.728	0.742945
X172	4	PAC	MSS	III	0	2	CMS1	iCMS3	499.339	715.912	0.708538
X173	4	PAC	MSS	II	0	2	CMS4	NA	-109.98	607.516	0.778816
X174	4	PAC	MSS	II	0	3	CMS4	iCMS2	407.286	24.1197	0.784868
X175	4	PAC	MSS	III	0	2	CMS1	NA	2.86905	-216.971	0.839975
X176	4	PAC	MSS	II	0	2	CMS2	NA	51.0532	-27.094	0.820504
X177	4	PAC	MSS	II	0	3	CMS2	iCMS2	-176.546	-40.4687	0.840207
X178	4	PAC	MSS	II	1	3	CMS2	NA	-325.83	-382.204	0.877076
X179	4	PAC	MSS	II	1	4	CMS1	iCMS3	611.075	1100.86	0.655253
X180	4	PAC	MSS	II	1	4	NOT_SIG	NA	-24.3118	125.636	0.81396
X182	4	PAC	MSS	III	1	3	NOT_SIG	NA	272.688	410.123	0.761472
X183	4	PAC	MSS	III	1	1	CMS4	iCMS3	1191.64	423.111	0.665961
X185	4	PAC	MSI	II	0	4	CMS1	NA	602.535	587.082	0.711188
X186	4	PAC	MSS	III	0	2	CMS2	NA	-126.37	-85.0271	0.839759
X187	4	PAC	MSS	III	0	1	CMS4	iCMS2	985.901	453.32	0.68496
X188	4	PAC	MSI	II	0	4	CMS1	NA	-5.26926	29.8861	0.820449
X189	4	PAC	MSI	II	0	1	CMS4	iCMS3	901.789	423.881	0.697008
X190	4	PAC	MSS	II	0	3	CMS2	NA	728.624	-8.28364	0.757889
X191	4	PAC	MSS	II	0	2	CMS3	NA	-175.321	-187.838	0.851645
X192	4	PAC	MSS	II	0	1	CMS4	iCMS2	383.259	915.617	0.699823
X193	4	PAC	MSS	II	0	3	CMS2	iCMS2	-13.7028	47.2205	0.819701
X194	4	PAC	MSS	II	0	2	CMS2	iCMS2	161.308	-67.9947	0.814642
X195	4	PAC	MSS	III	1	1	CMS4	iCMS2	973.824	-182.91	0.75109
X196	4	PAC	MSS	III	1	2	CMS3	iCMS3	70.2459	-129.1	0.827392
X197	4	PAC	MSS	II	1	4	CMS2	iCMS2	386.407	344.408	0.756885
X198	4	PAC	MSS	III	1	3	CMS2	iCMS2	-448.365	-406.741	0.887241
X199	4	PAC	MSS	III	1	3	CMS2	iCMS2	39.4474	-37.976	0.822387
X200	4	PAC	MSS	III	0	1	CMS4	iCMS2	-26.3823	-116.915	0.83429
X201	4	PAC	MSI	II	0	4	CMS1	iCMS3	293.427	1112.6	0.688502
X202	4	PAC	MSS	II	0	2	CMS3	NA	-156.774	-66.646	0.840716
X181	4	PAC	MSS	III	1	1	CMS4	iCMS3	1109.09	285.043	0.689766
X122	3	SOL	MSS	III	0	1	NOT_SIG	NA	396.987	379.001	0.752535
X123	3	SOL	MSS	III	0	1	CMS4	iCMS3	879.674	232.613	0.719122
X124	3	SOL	MSS	III	0	1	CMS4	iCMS3	525.089	62.4588	0.770461
X125	3	SOL	MSS	III	1	3	CMS2	iCMS2	43.6642	-219.222	0.836891
X126	3	SOL	MSS	III	1	3	CMS2	iCMS2	-33.7483	-133.176	0.836197
X127	3	SOL	MSS	III	1	1	CMS4	NA	794.971	-483.221	0.795631
X128	3	SOL	MSS	II	0	4	CMS1	iCMS3	741.845	1090.37	0.641813
X129	3	SOL	MSS	II	0	2	CMS1	NA	172.663	469.569	0.765319
X130	3	SOL	MSS	II	0	2	CMS2	NA	172.974	138.044	0.795696
X131	3	SOL	MSS	II	1	2	CMS2	iCMS2	312.325	20.9533	0.793712
X132	3	SOL	MSS	II	0	4	CMS4	iCMS3	789.401	1055.73	0.640359
X133	3	SOL	MSS	II	0	3	CMS2	iCMS2	92.1628	268.143	0.791293
X134	3	SOL	MSS	II	0	3	NOT_SIG	iCMS2	291.398	4.38881	0.797048
X135	3	SOL	MSI	II	0	4	CMS1	NA	-143.722	474.824	0.793907
X136	3	SOL	MSS	II	0	1	NOT_SIG	NA	1174.57	241.309	0.687452
X137	3	SOL	MSS	II	0	3	CMS2	iCMS2	271.884	-155.946	0.812712
X138	3	SOL	MSS	III	1	2	CMS3	NA	194.094	246.428	0.784039
X139	3	SOL	MSI	II	0	2	CMS3	NA	127.802	631.874	0.75411
X140	3	SOL	MSS	II	0	2	CMS2	iCMS2	57.2165	297.665	0.791779
X141	3	SOL	MSS	II	0	3	CMS4	iCMS2	525.062	73.5193	0.769428
X142	3	SOL	MSS	II	0	2	CMS3	NA	206.002	118.589	0.794487
X144	3	SOL	MSS	II	0	2	CMS3	NA	106.824	284.114	0.788535
X145	3	SOL	MSI	II	0	4	CMS1	iCMS3	216.94	716.059	0.737159
X146	3	SOL	MSI	III	0	4	CMS1	NA	253.527	786.563	0.726446
X147	3	SOL	MSS	II	0	3	NOT_SIG	NA	101.048	73.4575	0.807672
X148	3	SOL	MSI	II	0	4	CMS1	NA	109.888	-58.9318	0.818232
X149	3	SOL	MSS	II	1	4	CMS2	NA	95.8631	418.64	0.777252
X150	3	SOL	MSS	II	1	4	CMS2	NA	176.378	422.87	0.769365
X151	3	SOL	MSS	III	1	1	CMS4	NA	721.825	576.875	0.699841
X152	3	SOL	MSS	III	1	1	CMS4	NA	850.555	190.679	0.726331
X153	3	SOL	MSS	III	0	1	CMS4	iCMS3	978.008	736.973	0.654915
X154	3	SOL	MSS	III	0	3	CMS2	NA	220.21	219.671	0.784097
X158	3	SOL	MSS	II	1	2	NOT_SIG	iCMS2	117.73	353.301	0.781251
X160	3	SOL	MSS	III	1	4	CMS4	NA	752.683	1086.2	0.641063
X161	3	SOL	MSS	II	0	1	CMS4	NA	668.803	229.411	0.740599
X162	3	SOL	MSS	III	0	2	CMS2	NA	179.112	445.258	0.767004
X163	3	SOL	MSS	III	0	2	CMS2	iCMS2	9.61767	-30.8631	0.824279
X164	3	SOL	MSS	II	0	2	CMS4	NA	767.592	266.554	0.727045
X203	5	PAC	MSS	II	0	3	CMS2	NA	314.243	59.5136	0.790084
X204	5	PAC	MSS	III	0	1	CMS4	iCMS2	536.348	318.732	0.744839
X207	5	PAC	MSS	II	0	1	CMS4	NA	588.985	7.88953	0.769588
X208	5	PAC	MSS	III	0	2	CMS4	iCMS2	405.326	216.008	0.76729
X210	5	PAC	MSS	III	1	1	CMS4	iCMS2	683.861	-157.063	0.776115
X211	5	PAC	MSS	II	0	3	CMS2	iCMS2	329.692	184.914	0.777242
X212	5	PAC	MSS	II	0	3	CMS3	NA	-124.719	-62.1305	0.837797
X213	5	PAC	MSS	II	1	3	CMS2	iCMS2	341.646	-100.773	0.80189
X214	5	PAC	MSS	III	1	2	CMS3	iCMS3	45.8162	480.792	0.776133
X215	5	PAC	MSS	III	1	2	CMS3	NA	80.4986	-96.9829	0.823883
X216	5	PAC	MSS	III	1	1	CMS4	NA	769.163	442.58	0.708901
X217	5	PAC	MSI	II	1	4	CMS1	iCMS3	219.847	409.268	0.766557
X219	5	PAC	MSS	III	0	1	CMS4	iCMS2	707.77	561.189	0.702953
X220	5	PAC	MSS	III	0	2	CMS2	NA	-127.834	108.387	0.82413
X221	5	PAC	MSI	III	0	4	CMS1	iCMS3	591.153	1088.12	0.658867
X222	5	PAC	MSI	III	0	4	CMS1	iCMS3	477.489	487.38	0.733989
X225	5	PAC	MSS	III	0	2	CMS2	NA	-203.349	-270.268	0.860031
X226	5	PAC	MSI	III	0	2	CMS3	NA	609.606	-185.587	0.78554
X227	5	PAC	MSS	III	0	2	CMS2	NA	342.684	560.408	0.740118
X228	5	PAC	MSS	II	1	1	CMS4	iCMS3	1189.73	554.292	0.651687
X229	5	PAC	MSS	III	0	3	CMS2	iCMS2	-147.907	221.975	0.816277
X231	5	PAC	MSS	III	0	2	CMS2	iCMS2	-297.023	230.5	0.828024
X232	6	PAC	MSS	II	0	4	CMS2	NA	566.501	620.517	0.711457
X233	6	PAC	MSS	II	0	4	CMS2	NA	304.834	666.511	0.733343
X234	6	PAC	MSS	III	0	4	CMS1	iCMS3	387.942	680.639	0.723565
X235	6	PAC	MSS	III	0	1	CMS4	NA	592.173	161.605	0.754678
X236	6	PAC	MSS	III	1	4	CMS4	iCMS3	823.631	1127.2	0.628365
X237	6	PAC	MSS	II	0	1	CMS2	iCMS2	809.231	565.711	0.691803
X238	6	PAC	MSS	II	0	1	CMS4	iCMS2	834.896	-63.5193	0.752981
X239	6	PAC	MSS	II	0	2	CMS4	NA	493.684	343.502	0.746589
X240	6	PAC	MSS	II	0	1	CMS4	iCMS3	1285.16	534.424	0.643235
X243	6	PAC	MSS	III	1	2	CMS3	NA	37.4837	307.613	0.792656
X244	6	PAC	MSS	III	1	2	CMS3	NA	-102.494	-123.279	0.840903
X245	6	PAC	MSI	II	0	4	CMS1	NA	601.719	425.781	0.727715
X246	6	PAC	MSI	II	0	2	CMS3	NA	688.907	313.319	0.730254
X247	6	PAC	MSS	III	0	3	CMS2	NA	499.987	122.595	0.767172
X248	6	PAC	MSS	III	0	1	CMS4	NA	1050.63	449.951	0.678369
X249	6	PAC	MSS	III	1	2	CMS4	iCMS2	-17.8616	-52.3618	0.828328
X250	6	PAC	MSS	III	1	1	CMS4	iCMS2	772.619	-345.73	0.785279
X251	6	PAC	MSS	II	1	1	CMS4	iCMS2	356.808	-80.5292	0.798774
X252	6	PAC	MSS	II	1	3	CMS2	iCMS2	133.129	206.122	0.793179
X253	6	PAC	MSS	II	1	2	CMS2	NA	160.79	208.62	0.790475
X254	6	PAC	MSS	II	1	2	CMS2	NA	384.734	610.047	0.731
X255	6	PAC	MSS	III	0	3	CMS2	iCMS2	218.431	-6.15571	0.804391
X256	6	PAC	MSS	III	0	1	CMS4	iCMS2	416.918	-263.407	0.809486
X258	6	PAC	MSS	II	0	3	CMS2	iCMS2	-19.4188	412.003	0.788387
X261	6	PAC	MSS	II	0	3	CMS4	NA	484.911	230.154	0.758394
X267	6	PAC	MSS	III	0	2	CMS3	NA	-369.807	114.667	0.843228
X268	6	PAC	MSS	III	0	2	CMS3	NA	-162.673	74.0233	0.829841
X269	6	PAC	MSS	III	0	2	CMS3	NA	325.417	138.552	0.781898
X270	6	PAC	MSS	II	0	2	CMS3	NA	146.745	86.6558	0.802545
X271	6	PAC	MSS	II	0	2	CMS4	NA	712.633	160.718	0.743047
X272	6	PAC	MSS	II	0	2	CMS3	NA	284.349	44.7114	0.794089
X273	6	PAC	MSS	II	0	2	CMS2	iCMS2	38.8933	495.653	0.775397
X274	6	PAC	MSS	III	0	2	NOT_SIG	iCMS2	146.035	537.459	0.761407
X275	6	PAC	MSS	II	0	2	CMS2	iCMS2	118.391	507.133	0.766895
X278	6	PAC	MSI	II	0	4	CMS1	iCMS3	443.864	634.423	0.722581
X282	6	PAC	MSS	II	0	2	CMS3	NA	-179.342	1.4285	0.83708
X283	6	PAC	MSS	II	0	2	CMS3	NA	-296.223	-204.218	0.862033
X1	1	SOL	MSS	III	1	1	CMS2	iCMS2	517.297	282.718	0.750208
X2	1	SOL	MSS	II	1	2	CMS3	NA	-110.131	-150.064	0.843627
X4	1	SOL	MSS	II	1	3	CMS2	iCMS2	328.688	32.2399	0.791237
X5	1	SOL	MSS	III	1	1	CMS2	iCMS2	445.83	377.592	0.747931
X6	1	SOL	MSI	II	1	4	NOT_SIG	NA	497.096	495.659	0.731203
X7	1	SOL	MSS	III	1	3	CMS2	iCMS2	172.163	85.1452	0.800446
X8	1	SOL	MSS	II	1	2	CMS4	NA	739.257	325.586	0.723944
X9	1	SOL	MSI	II	1	4	CMS1	iCMS3	663.867	627.849	0.700573
X10	1	SOL	MSS	II	1	3	CMS2	iCMS2	315.206	396.329	0.758732
X11	1	SOL	MSS	II	1	2	CMS4	iCMS2	-133.97	526.33	0.788407
X12	1	SOL	MSS	II	0	2	CMS2	NA	412.74	34.67	0.783411
X13	1	SOL	MSS	II	0	4	CMS3	NA	387.073	525.402	0.739191
X14	1	SOL	MSS	II	0	2	CMS3	iCMS2	529.463	94.6032	0.767033
X15	1	SOL	MSS	III	0	4	CMS2	NA	214.47	202.624	0.786169
X16	1	SOL	MSI	III	0	4	CMS1	NA	186.932	322.456	0.777724
X17	1	SOL	MSS	II	0	2	CMS2	NA	0.500056	85.3382	0.815278
X19	1	SOL	MSS	II	0	3	CMS2	iCMS2	219.409	213.067	0.784771
X20	1	SOL	MSS	III	0	2	CMS4	NA	820.833	523.556	0.695035
X21	1	SOL	MSS	II	0	1	CMS4	iCMS2	321.175	831.932	0.714946
X22	1	SOL	MSS	III	0	2	CMS2	iCMS2	215.248	28.647	0.801625
X23	1	SOL	MSS	III	0	3	CMS4	iCMS2	175.492	-103.227	0.81643
X24	1	SOL	MSS	II	0	4	CMS4	iCMS3	914.242	718.825	0.663954
X25	1	SOL	MSS	III	0	2	CMS3	NA	271.509	291.08	0.772791
X26	1	SOL	MSI	II	0	4	CMS1	NA	280.59	435.393	0.758306
X27	1	SOL	MSS	II	0	2	CMS4	iCMS2	8.13512	165.73	0.807728
X28	1	SOL	MSS	II	0	3	CMS2	iCMS2	-106.353	-519.1	0.871189
X29	1	SOL	MSS	III	0	2	CMS2	iCMS2	151.623	218.468	0.790414
X30	1	SOL	MSI	II	0	1	NOT_SIG	NA	491.745	892.569	0.690809
X31	1	SOL	MSS	II	0	4	CMS1	NA	218.818	171.699	0.788574
X33	1	SOL	MSS	II	0	3	CMS2	iCMS2	44.4676	46.5715	0.814836
X34	1	SOL	MSS	II	0	1	CMS4	iCMS3	877.009	488.512	0.692801
X35	1	SOL	MSS	II	0	2	CMS2	iCMS2	232.343	300.682	0.775538
X36	1	SOL	MSS	III	0	4	CMS4	NA	355.278	895.759	0.704821
X37	1	SOL	MSS	II	0	2	NOT_SIG	NA	-79.6631	437.712	0.791495
X38	1	SOL	MSI	III	0	4	CMS1	iCMS3	299.192	196.256	0.779009
X39	1	SOL	MSS	III	0	1	CMS4	iCMS2	661.998	378.411	0.726414
X40	1	SOL	MSI	II	0	4	CMS1	iCMS3	343.572	723.191	0.72375
X41	1	SOL	MSS	III	0	4	CMS3	NA	393.406	580.113	0.733127
X42	1	SOL	MSS	II	0	3	CMS2	NA	279.067	121.62	0.787655
X43	1	SOL	MSS	II	0	4	CMS2	NA	894.278	792.827	0.658002
X45	1	SOL	MSS	III	0	2	CMS3	NA	453.01	-65.2345	0.788821
X46	1	SOL	MSS	II	0	1	CMS4	NA	538.971	265.943	0.749732
X47	1	SOL	MSS	II	0	2	NOT_SIG	NA	241.17	287.489	0.775943
X48	1	SOL	MSS	II	0	3	CMS3	NA	-0.950354	-23.0382	0.824507
X49	1	SOL	MSS	III	0	2	CMS3	NA	230.855	95.1913	0.794358
X50	2	SOL	MSS	III	0	2	NOT_SIG	iCMS2	-228.971	-147.099	0.852637
X51	2	SOL	MSI	II	0	2	CMS1	NA	154.793	-170.902	0.823852
X52	2	SOL	MSI	II	0	2	CMS1	NA	235.861	437.44	0.762376
X53	2	SOL	MSS	III	0	2	CMS4	iCMS2	180.072	395.302	0.771599
X54	2	SOL	MSI	II	0	2	CMS1	NA	231.953	620.462	0.7451
X55	2	SOL	MSI	III	0	2	CMS1	NA	170.897	720.757	0.741246
X57	2	SOL	MSS	II	0	2	CMS2	iCMS2	175.604	80.3868	0.800562
X58	2	SOL	MSS	III	0	2	CMS4	iCMS2	296.918	112.482	0.786866
X59	2	SOL	MSS	II	0	2	CMS2	iCMS2	295.587	381.358	0.76203
X60	2	SOL	MSI	III	0	2	CMS1	NA	441.115	224.666	0.76309
X61	2	SOL	MSI	III	0	2	CMS1	NA	401.183	824.482	0.707459
X62	2	SOL	MSS	II	0	3	CMS2	iCMS2	167.326	205.972	0.790125
X63	2	SOL	MSI	II	0	2	CMS1	iCMS3	496.544	306.413	0.749922
X64	2	SOL	MSS	II	0	1	CMS4	NA	365.809	119.11	0.779977
X65	2	SOL	MSS	II	0	2	CMS3	NA	77.7281	139.218	0.803983
X67	2	SOL	MSS	II	0	2	CMS4	NA	192.72	203.27	0.788079
X69	2	SOL	MSS	II	0	2	CMS2	iCMS2	90.26	33.8025	0.812016
X70	2	SOL	MSI	III	0	4	CMS1	NA	474.562	247.505	0.757724
X71	2	SOL	MSS	III	0	2	CMS3	iCMS2	282.885	11.3413	0.797186
X72	2	SOL	MSS	II	0	1	CMS2	iCMS2	52.1361	354.305	0.787134
X73	2	SOL	MSS	III	0	2	CMS4	iCMS2	208.208	89.0938	0.796914
X74	2	SOL	MSS	II	0	3	CMS2	iCMS2	-130.613	-125.414	0.843298
X75	2	SOL	MSS	III	0	1	CMS2	iCMS2	643.738	354.639	0.73064
X76	2	SOL	MSS	II	0	2	CMS2	iCMS2	-196.814	230.947	0.819649
X77	2	SOL	MSS	III	0	4	NOT_SIG	NA	426.268	458.072	0.741966
X78	2	SOL	MSS	II	0	1	CMS4	NA	536.326	26.2763	0.77279
X79	2	SOL	MSS	II	0	1	CMS2	NA	26.052	65.8433	0.814763
X80	2	SOL	MSS	II	0	2	CMS1	NA	240.362	294.584	0.77536
X81	2	SOL	MSI	II	0	4	CMS1	iCMS3	790.018	611.178	0.689016
X82	2	SOL	MSI	III	0	4	CMS1	iCMS3	669.506	435.14	0.719901
X83	2	SOL	MSS	II	0	1	CMS4	NA	625.441	403.242	0.727595
X84	2	SOL	MSS	III	0	1	CMS4	NA	549.319	445.091	0.731037
X85	2	SOL	MSS	III	0	4	CMS4	iCMS3	890.31	869.652	0.649911
X86	2	SOL	MSS	II	0	1	CMS4	NA	513.121	302.949	0.748647
X87	2	SOL	MSI	II	0	2	CMS1	NA	101.304	562.813	0.763247
X88	2	SOL	MSI	III	0	4	CMS1	iCMS3	415.876	547.196	0.734169
X89	2	SOL	MSS	III	0	1	CMS4	iCMS2	417.221	294.779	0.758687
X90	2	SOL	MSS	III	0	4	CMS1	NA	443.114	607.578	0.725376
X91	2	SOL	MSI	III	0	2	CMS3	NA	48.9331	441.358	0.779483
X92	2	SOL	MSS	II	0	2	CMS2	NA	403.975	128.541	0.775585
X93	2	SOL	MSS	II	0	4	NOT_SIG	NA	323.133	457.316	0.752104
X94	2	SOL	MSI	III	0	4	CMS1	iCMS3	768.029	1105.77	0.637121
X95	2	SOL	MSS	II	0	4	CMS4	NA	387.264	435.25	0.74802
X96	2	SOL	MSS	II	0	4	CMS1	NA	145.759	559.655	0.759317
X97	2	SOL	MSS	III	0	2	CMS1	NA	108.132	369.361	0.780658
X98	2	SOL	MSS	III	0	1	CMS4	iCMS2	592.972	185.276	0.752317
X99	2	SOL	MSS	III	0	1	CMS4	NA	471.633	87.8861	0.773077
X100	2	SOL	MSS	III	0	2	CMS2	iCMS2	14.7742	197.752	0.804369
X101	2	SOL	MSI	III	0	4	CMS1	NA	379.981	543.164	0.738135
X102	2	SOL	MSS	II	0	1	CMS3	iCMS3	456.037	123.207	0.771237
X103	2	SOL	MSI	III	0	1	CMS1	iCMS3	845.177	397.221	0.70572
X104	2	SOL	MSI	III	0	4	CMS1	iCMS3	892.405	1028.17	0.631814
X106	2	SOL	MSS	III	0	3	CMS2	iCMS2	-252.594	10.5532	0.842193
X107	2	SOL	MSS	III	0	2	CMS4	iCMS2	51.3013	300.84	0.792025
X108	2	SOL	MSS	III	1	3	NOT_SIG	iCMS2	161.208	108.069	0.799392
X109	2	SOL	MSS	III	0	4	CMS4	NA	302.531	627.844	0.737419
X110	2	SOL	MSS	II	0	4	CMS2	NA	41.3146	213.764	0.800642
X111	2	SOL	MSS	III	0	2	CMS3	NA	381.066	255.752	0.76583
X112	2	SOL	MSS	III	0	1	CMS4	iCMS2	745.712	66.053	0.749066
X113	2	SOL	MSS	III	1	1	CMS3	NA	287.021	19.5332	0.796092
X114	2	SOL	MSS	III	0	4	NOT_SIG	NA	312.485	295.374	0.768557
X115	2	SOL	MSS	III	1	2	CMS3	iCMS3	320.44	247.598	0.772283
X116	2	SOL	MSS	III	1	2	CMS3	NA	497.173	96.9918	0.769841
X117	2	SOL	MSS	III	1	1	CMS2	NA	437.169	285.417	0.757674
X118	2	SOL	MSS	II	1	3	CMS2	iCMS2	100.154	-101.886	0.822654
X119	2	SOL	MSS	III	1	1	CMS2	iCMS2	705.477	13.1136	0.758057
X120	2	SOL	MSI	II	1	4	CMS4	iCMS3	810.1	895.058	0.656004
X121	2	SOL	MSS	II	1	1	CMS3	NA	889.856	288.942	0.712304
X205	5	PAC	MSI	III	0	4	CMS1	NA	1052.16	668.612	0.654272
X209	5	PAC	MSS	II	1	4	CMS3	NA	-94.8912	427.357	0.793785
X223	5	PAC	MSI	III	0	4	CMS1	iCMS3	569.961	1183.63	0.650622
X224	5	PAC	MSS	III	0	2	CMS2	iCMS2	163.855	-258.636	0.830342
X241	6	PAC	MSI	II	0	4	CMS1	iCMS3	505.263	422.536	0.737674
X242	6	PAC	MSI	II	0	4	CMS1	NA	112.484	462.577	0.771628
X257	6	PAC	MSS	II	0	2	CMS3	NA	-175.398	268.652	0.814647
X259	6	PAC	MSS	II	0	3	CMS4	NA	849.468	532.822	0.691024
X260	6	PAC	MSS	II	0	3	CMS2	NA	-22.918	55.7865	0.819756
X262	6	PAC	MSS	II	0	3	CMS2	NA	62.6126	154.939	0.803931
X276	6	PAC	MSI	II	0	4	CMS1	iCMS3	129.974	360.918	0.779428
X277	6	PAC	MSI	II	0	4	CMS1	NA	187.351	485.667	0.762403
X279	6	PAC	MSS	III	0	4	CMS2	NA	256.802	492.724	0.755087
X280	6	PAC	MSS	III	0	4	NOT_SIG	iCMS2	-21.6707	396.934	0.789948
X281	6	PAC	MSS	III	0	4	CMS4	iCMS2	760.986	635.766	0.689488
X32	1	SOL	MSS	II	0	4	CMS2	NA	339.315	368.858	0.759053
X44	1	SOL	MSI	II	0	4	CMS1	iCMS3	982.464	607.494	0.668672
X56	2	SOL	MSS	II	0	2	CMS2	iCMS2	35.567	-78.7711	0.8261
X68	2	SOL	MSS	II	0	1	CMS2	NA	566.294	-8.6019	0.773247
X105	2	SOL	MSS	III	0	1	NOT_SIG	NA	262.703	-70.7587	0.80616
X284	7	PAC	MSI	II	0	1	CMS1	iCMS3	1040.07	708.69	0.651159
X285	7	PAC	MSS	II	0	2	CMS1	iCMS3	107.094	495.093	0.769089
X286	7	PAC	MSI	III	0	4	CMS4	iCMS3	595.068	459.088	0.725025
X287	7	PAC	MSI	III	0	2	CMS1	NA	670.101	-173.508	0.778903
X288	7	PAC	MSS	III	0	3	CMS2	iCMS2	237.402	128.156	0.790821
X289	7	PAC	MSS	III	1	4	CMS1	NA	51.2583	161.549	0.804345
X290	7	PAC	MSI	II	0	4	CMS1	iCMS3	147.333	221.468	0.79053
X291	7	PAC	MSI	III	0	4	CMS1	iCMS3	878.454	811.515	0.657685
X292	7	PAC	MSS	II	0	1	CMS4	NA	1049.71	952.038	0.622533
X293	7	PAC	MSS	II	1	3	CMS4	iCMS2	627.666	-39.3326	0.770387
X294	7	PAC	MSS	II	0	2	CMS3	NA	99.9833	70.9963	0.807977
X295	7	PAC	MSS	II	0	3	CMS2	NA	311.22	107.714	0.786002
X296	7	PAC	MSS	II	0	2	CMS3	NA	503.377	158.728	0.763438
X297	7	PAC	MSS	II	0	3	CMS2	iCMS2	125.939	-23.4872	0.813863
X298	7	PAC	MSS	III	0	2	CMS4	NA	348.291	386.543	0.7565
X299	7	PAC	MSS	III	0	1	CMS4	NA	762.186	696.293	0.682897
X300	7	PAC	MSS	II	0	3	CMS2	iCMS2	49.9142	-290.392	0.842069
X301	7	PAC	MSI	II	0	4	CMS1	iCMS3	496.819	833.48	0.69652
X302	7	PAC	MSI	III	0	4	CMS1	NA	220.857	542.302	0.753774
X303	7	PAC	MSS	III	0	2	CMS3	NA	-172.216	455.247	0.798177
X304	7	PAC	MSS	III	0	2	CMS3	NA	-303.573	201.945	0.830902
X305	7	PAC	MSS	III	1	2	CMS3	NA	-417.472	86.6691	0.849146
X306	7	PAC	MSS	II	1	2	CMS2	NA	30.0851	303.9	0.793649
X307	7	PAC	MSS	III	1	2	CMS3	NA	-61.2709	191.675	0.811472
X308	7	PAC	MSS	II	0	1	CMS2	NA	315.753	216.701	0.775591
X309	7	PAC	MSS	III	1	1	CMS4	NA	1330.65	653.375	0.624567
X310	7	PAC	MSI	II	0	2	CMS1	iCMS3	70.3611	585.072	0.76407
X311	7	PAC	MSS	III	0	2	CMS3	NA	434.561	261.598	0.7602
X312	7	PAC	MSS	II	0	2	CMS3	NA	140.854	253.563	0.788221
X313	7	PAC	MSS	II	0	2	CMS2	NA	53.4124	220.719	0.798964
X314	7	PAC	MSS	III	0	1	CMS4	NA	580.57	575.59	0.714632
X315	7	PAC	MSS	II	0	1	CMS4	NA	748.101	71.2932	0.748324
X316	7	PAC	MSS	II	0	4	CMS1	iCMS2	439.721	-72.9599	0.790713
X317	7	PAC	MSI	II	0	1	CMS1	iCMS3	1011.21	683.917	0.657114
X318	7	PAC	MSS	II	0	3	CMS2	iCMS2	448.875	222.753	0.762535
X319	7	PAC	MSS	III	0	2	CMS2	NA	258.544	212.669	0.781234
X320	7	PAC	MSI	II	0	1	CMS1	iCMS3	870.465	351.086	0.707885
X321	7	PAC	MSI	II	0	2	CMS1	NA	236.256	735.383	0.733314
X323	7	PAC	MSS	II	1	3	CMS2	iCMS2	-59.3734	-172.907	0.84142
X324	7	PAC	MSS	III	0	3	CMS2	iCMS2	317.883	-260.038	0.817651
X325	7	PAC	MSS	II	0	2	CMS3	NA	-176.892	0.860979	0.836929
X326	7	PAC	MSI	II	0	4	CMS3	NA	25.3885	481.39	0.777965
X327	7	PAC	MSS	III	0	4	CMS2	NA	363.684	156.945	0.776686
X328	7	PAC	MSI	II	0	4	CMS1	iCMS3	481.258	541.473	0.728195
X329	7	PAC	MSS	III	0	3	CMS2	iCMS2	4.20349	-357.237	0.850865
X330	8	PAC	MSS	III	1	4	NOT_SIG	NA	1201.29	311.664	0.677034
X331	8	PAC	MSS	II	0	1	CMS4	iCMS2	930.478	21.6456	0.735259
X332	8	PAC	MSS	II	0	1	CMS2	iCMS2	621.074	318.626	0.736494
X333	8	PAC	MSS	III	0	2	CMS4	NA	235.653	21.9594	0.800419
X334	8	PAC	MSS	II	0	1	CMS3	NA	995.65	218.777	0.708623
X335	8	PAC	MSS	II	0	2	CMS2	NA	309.079	419.78	0.757073
X336	8	PAC	MSS	II	0	2	CMS2	iCMS2	445.182	154.527	0.769322
X337	8	PAC	MSS	III	1	2	CMS4	NA	212.876	199.197	0.786624
X338	8	PAC	MSS	II	0	3	CMS4	iCMS2	325.238	231.209	0.773363
X339	8	PAC	MSS	II	1	3	CMS4	iCMS2	300.919	-1.39405	0.796716
X340	8	PAC	MSS	III	0	4	CMS1	iCMS3	173.102	838.991	0.729264
X341	8	PAC	MSS	II	0	3	CMS2	iCMS2	-34.2493	-201.548	0.841699
X342	8	PAC	MSS	III	0	2	CMS4	iCMS2	397.446	263.56	0.763542
X343	8	PAC	MSS	III	0	3	CMS2	iCMS2	-94.8143	-48.0639	0.834256
X344	8	PAC	MSS	II	0	3	CMS4	NA	595.906	394.271	0.731461
X345	8	PAC	MSS	III	0	2	CMS3	NA	-271.598	-219.49	0.861337
X346	8	PAC	MSS	II	0	3	CMS2	iCMS2	525.387	297.847	0.74795
X347	8	PAC	MSS	III	0	2	CMS2	NA	46.7654	128.51	0.807606
X348	8	PAC	MSS	II	0	3	NOT_SIG	NA	28.9623	215.822	0.801547
X349	8	PAC	MSS	III	0	2	CMS2	iCMS2	550.81	136.094	0.761082
X350	8	PAC	MSS	II	0	2	NOT_SIG	iCMS2	130.83	555.915	0.761097
X351	8	PAC	MSS	II	0	2	CMS2	NA	278.961	546.182	0.747764
X352	8	PAC	MSS	III	1	2	CMS2	iCMS2	366.231	551.882	0.738633
X353	8	PAC	MSS	II	0	2	CMS1	iCMS3	568.506	277.056	0.74577
X354	8	PAC	MSI	III	0	4	CMS1	NA	528.358	399.209	0.737697
X355	8	PAC	MSS	III	0	1	NOT_SIG	NA	883.127	745.087	0.664486
X356	8	PAC	MSS	II	0	2	CMS2	NA	109.716	231.524	0.793001
X357	8	PAC	MSS	II	0	4	CMS3	iCMS3	541.858	657.981	0.710133
X358	8	PAC	MSS	III	0	3	CMS2	NA	136.196	-29.7638	0.813524
X359	8	PAC	MSS	II	0	4	CMS2	NA	400.766	471.027	0.7432
X360	8	PAC	MSS	III	1	2	CMS3	NA	-201.737	82.9682	0.832299
X361	8	PAC	MSS	III	0	1	CMS4	NA	487.925	209.851	0.760046
X362	8	PAC	MSS	II	0	2	CMS2	NA	-98.1722	458.15	0.791322
X363	8	PAC	MSS	II	0	2	CMS3	NA	323.592	602.172	0.737876
X364	8	PAC	MSS	II	0	2	NOT_SIG	NA	272.514	-133.763	0.810756
X365	8	PAC	MSS	II	0	1	CMS4	NA	674.783	652.083	0.696882
X366	8	PAC	MSS	II	0	4	CMS4	NA	74.1741	480.813	0.773499
X367	8	PAC	MSS	III	1	2	CMS3	NA	36.6814	150.043	0.806614
X368	8	PAC	MSS	III	0	2	CMS3	NA	282.663	239.657	0.776529
X369	8	PAC	MSS	III	0	2	CMS2	NA	635.121	366.416	0.730323
X370	8	PAC	MSS	II	0	2	CMS2	NA	419.013	439.214	0.744531
X371	8	PAC	MSS	II	0	3	CMS2	NA	147.268	370.987	0.776905
X372	8	PAC	MSS	III	0	2	CMS2	iCMS2	-145.65	170.102	0.820463
X373	8	PAC	MSS	II	0	2	CMS2	NA	178.687	170.922	0.792252
X374	8	PAC	MSS	III	1	1	CMS4	NA	499.885	728.181	0.707209

## Sheet: S2B-PCG log2 intensity
Gene.name	ANOVA-based protein clusters	Description-cluster	Limma FC (RFS yes vs no) in SUBTYPE 1	P-value (limma RFS yes vs no)	Hazard ratio in SUBTYPE 1	P-value (cox hr test) in SUBTYPE 1	Prognostic for CRC (HPA)	1	2	4	5	6	7	8	9	10	11	12	13	14	15	16	17	19	20	21	22	23	24	25	26	27	28	29	30	31	32	33	34	35	36	37	38	39	40	41	42	43	44
COL14A1	1	EMT	0.962989	5.93758e-05	2.18083	6.07822e-05	NA	16.8713	13.7639	15.746	16.7412	15.8075	14.6031	12.2743	16.419	15.8298	15.2746	15.7058	15.8174	16.0421	15.9226	14.9054	15.3541	15.4943	15.1925	17.0971	15.5327	15.2247	16.1113	14.8622	15.1094	15.5242	14.9192	14.6977	16.6522	15.295	16.0359	16.642	16.8146	16.714	15.4095	16.1447	15.4486	17.1871	14.8961	15.0349	15.5331	17.2872	17.6788
TNXB	1	EMT	0.864274	0.000136168	2.35128	0.000160693	NA	14.1052	12.4015	13.3217	13.5635	13.5141	12.7631	13.9995	14.167	12.4272	13.54	13.3186	13.1515	14.5383	13.04	13.1255	11.7325	13.6882	14.6826	13.6669	13.8427	12.9862	12.7554	12.1474	11.4875	12.8995	12.2724	11.5391	12.8078	12.4729	13.1981	13.1342	13.0364	15.1471	13.2446	13.1781	11.8484	14.0257	12.2878	13.5683	13.6916	13.3016	13.707
H6PD	not-sig	not-sig	#N/A	#N/A	#N/A	#N/A	NA	15.365	13.5715	12.9062	13.1686	13.2688	13.3459	13.2685	13.1164	13.7531	13.9372	14.1026	14.2709	14.0603	13.2604	13.7072	14.0197	14.3436	15.8172	13.7757	13.8344	13.5741	13.7788	14.5383	13.4152	13.2048	14.2034	12.5971	14.0682	13.9255	13.1982	13.5594	13.5869	14.0881	13.444	14.086	13.4369	13.616	13.2034	13.1339	13.4126	13.561	13.11
LUM	1	EMT	0.7024	0.000360442	2.45259	0.000594089	NA	18.1015	14.839	16.7953	17.4012	17.1121	16.7107	17.4909	17.7815	16.1454	16.134	16.0476	16.3438	17.3592	16.2977	15.8108	15.7795	15.7451	19.2274	17.3325	16.1356	16.7792	17.9732	15.4681	15.7805	15.1493	15.387	15.463	16.6771	16.0533	15.9432	16.647	18.6057	15.9536	16.106	15.9395	15.9637	16.9851	15.0797	15.8834	16.291	17.7327	17.4978
DOCK11	1	EMT	0.700531	0.00170105	2.40475	0.00108113	NA	15.94	15.7572	15.2377	16.0387	14.6305	14.6485	13.1101	17.0256	15.9189	14.3575	16.1489	16.5938	11.8532	16.083	15.5692	13.9984	15.9302	13.9622	15.6597	15.7917	16.2562	16.0967	13.9555	14.1265	13.6772	15.5879	15.6717	15.8142	15.0122	16.6158	16.8245	15.8252	13.3923	15.293	17.1464	16.0154	16.0906	15.4832	16.3154	16.6377	14.5242	16.4162
DCN	1	EMT	0.472649	0.00396273	2.95934	0.00151349	NA	18.2278	15.2733	17.4053	18.1694	17.8804	17.8551	17.8316	18.3759	17.1868	16.6194	17.5993	16.7395	18.3902	16.893	16.8731	16.6578	17.027	18.341	17.5276	17.6943	16.8885	18.7666	16.7629	16.5278	16.1574	15.7853	16.8999	17.5853	16.7495	16.4464	17.0587	18.5899	17.0394	17.0756	17.0021	17.2255	18.3604	15.365	16.1153	17.7742	18.0453	17.8207
ANXA6	1	EMT	0.280285	0.00907433	6.15522	0.00270949	NA	18.2501	16.2829	17.7878	18.1614	17.5567	17.194	17.086	18.3096	17.6709	17.953	17.7133	17.9646	18.4158	17.6838	17.0608	17.1782	17.3708	17.6806	18.4856	17.1993	17.6245	18.1505	17.2426	17.0496	17.2448	16.3499	17.0187	17.5864	17.2243	18.3969	17.1684	17.8237	18.2307	17.3892	18.2018	17.1675	17.6284	17.0044	16.8327	17.5317	18.3517	17.562
ADSL	not-sig	not-sig	#N/A	#N/A	#N/A	#N/A	NA	15.6212	13.4261	13.764	14.2801	13.3178	13.4591	14.8022	14.817	13.3442	13.5797	13.1659	14.0691	13.9997	13.21	13.6791	13.4552	13.1712	14.9995	13.1372	13.5809	13.6723	13.9165	12.9801	13.5182	13.7378	13.4584	13.3137	14.1162	14.6686	13.9602	14.1561	15.9642	13.8925	13.2866	14.8547	14.5863	15.0563	13.0831	13.2551	12.7074	14.2197	11.8353
BGN	1	EMT	0.527303	0.00345366	2.62435	0.00414711	NA	18.9259	16.1898	18.6186	18.532	18.7926	17.9046	17.7117	19.0994	17.7122	17.9896	17.5898	17.2428	19.1056	16.4931	17.4482	17.0589	17.2516	21.1167	18.4406	17.4171	17.4765	18.8448	16.8022	16.8916	17.7282	16.7487	16.8455	17.8778	17.8809	17.106	17.3208	18.6897	17.0395	17.2414	16.6224	17.479	17.9827	16.9355	17.2803	17.7647	18.1751	17.9725
COL5A2	1	EMT	0.489102	0.00396164	2.7357	0.00570848	NA	15.3078	13.222	14.6942	14.8686	15.7565	14.1873	13.284	15.9617	14.9221	14.138	13.9763	14.8044	13.9871	14.6455	15.4141	14.0903	14.2964	11.5497	15.223	14.3043	14.4561	14.797	14.7462	14.9182	14.5557	14.8551	13.9929	15.1552	14.9551	13.9152	14.6444	16.1433	12.7699	15.2574	15.0964	14.7691	15.1467	14.2951	14.5933	14.3069	15.8107	15.0707
AP2M1	1	EMT	0.465418	0.00871155	2.61305	0.00759166	NA	17.2474	15.029	16.3767	16.8926	16.6509	16.3612	15.9205	17.1621	16.3294	16.5701	15.4195	16.4134	16.089	16.2021	16.2709	16.1706	16.6021	17.8545	16.7584	15.8837	16.698	17.1477	16.5694	16.3256	16.0788	16.5667	16.0905	16.6939	16.7292	16.5725	16.7118	17.7868	15.7297	16.4266	16.3316	16.1726	15.4521	15.9934	16.4388	16.2939	17.114	16.8051
COL3A1	1	EMT	0.472667	0.00987394	2.53003	0.00789675	NA	14.2232	12.3044	14.0544	13.89	13.2974	13.7628	14.5361	14.4481	12.9205	13.0551	13.6738	13.5393	14.9133	13.7313	12.7391	11.8999	12.9832	14.1794	13.7063	12.0781	12.9316	15.1623	13.7541	13.7928	13.233	13.0041	12.8848	13.9711	13.2773	12.8012	13.0726	15.3545	12.4795	14.9248	12.641	14.0849	14.9	14.4422	13.3894	14.6991	14.7783	14.0157
PPM1F	not-sig	not-sig	#N/A	#N/A	#N/A	#N/A	NA	12.0321	10.139	12.7051	11.8508	11.6107	12.2434	12.6503	12.8499	12.1605	12.2848	11.3414	12.004	13.1101	11.966	12.3252	10.0028	12.8118	14.0058	12.1328	11.5888	11.1072	13.0051	11.8011	13.1764	11.3653	11.5067	10.921	12.308	11.7626	11.5444	12.3365	12.7119	11.4632	12.5452	12.2281	13.2431	13.1371	12.7326	11.7579	12.6176	13.8029	12.3958
CRMP1	1	EMT	0.420907	0.0123037	2.51711	0.0123238	NA	16.9449	14.8475	14.5696	15.4122	15.0232	15.644	16.3625	15.8773	15.2466	13.2624	15.6305	14.7777	14.9273	14.5856	14.7322	14.4761	14.3533	15.2387	14.8194	15.7435	15.1019	15.9771	14.8523	15.1771	14.7296	14.2292	14.4792	14.2887	15.2573	15.4829	15.0763	16.6862	15.8193	15.7654	15.3457	16.3788	16.1251	15.2601	14.7825	14.9118	15.3693	14.4177
GPX3	1	EMT	0.487123	0.0172703	2.12031	0.0152195	NA	15.7085	13.8739	14.2393	16.6207	15.3706	14.2265	13.0845	16.9268	15.4513	14.0507	13.8967	13.566	14.9817	14.8209	14.0598	13.4481	13.5627	15.3125	13.9831	13.7749	13.0741	14.4033	13.4489	12.8757	13.7563	13.0388	12.4404	13.6155	13.6722	13.7419	13.404	14.4261	15.239	13.5451	12.2391	14.8686	14.9751	12.8939	13.6802	14.7246	15.9437	15.4909
EHD2	1	EMT	0.464152	0.0259916	2.03492	0.0153486	NA	13.6895	14.2555	15.2311	14.1625	12.855	14.2521	15.9342	14.607	14.2371	14.521	14.3363	14.485	15.509	14.7694	13.7334	14.444	14.0305	16.0081	15.2715	14.772	14.5079	15.2627	14.1618	14.1426	14.6362	13.5653	14.1115	14.4457	14.2134	14.2245	14.5368	14.8851	14.4217	14.6746	14.1059	13.4412	15.3266	13.8002	14.657	14.9237	15.7476	16.0366
COL6A3	1	EMT	0.451827	0.0200684	2.07362	0.0163969	NA	17.5869	16.457	18.7906	18.5762	18.1895	17.6515	18.1044	18.4049	16.2736	16.9391	18.1134	17.0194	18.5573	17.8785	17.2164	17.7037	17.4941	17.5045	18.8551	17.9051	17.5569	19.4247	17.2083	17.0108	18.3836	16.7939	17.1816	17.2847	17.1372	17.8594	17.3229	17.6501	17.8149	17.4852	17.2655	17.4385	18.3641	16.6031	17.3794	17.182	18.7659	18.7747
EMILIN1	1	EMT	0.361542	0.017811	2.80105	0.0182956	NA	16.3819	14.2429	15.5895	15.9793	14.1259	15.2996	14.82	16.0337	15.4273	15.5846	15.9609	15.3477	17.1298	15.6119	14.7814	15.589	14.4584	17.2067	16.4287	16.0796	15.258	15.9206	15.0572	15.1694	15.5146	14.654	14.3078	15.4408	15.009	16.0719	15.053	16.5561	15.9399	15.0887	14.849	16.0894	16.9164	13.7715	15.7039	15.8189	17.2988	17.3908
CAVIN1	1	EMT	0.359153	0.0305465	2.39791	0.0183433	YES	14.2267	14.5485	16.1141	14.5159	13.4121	14.846	15.7871	15.0038	14.8149	14.6298	15.1533	14.7439	15.7171	14.6951	13.7441	15.0847	14.6973	15.6368	15.9254	15.4649	15.0951	15.7743	14.4775	14.7421	15.3834	13.7604	14.761	14.8225	14.6551	14.4412	15.0164	15.128	15.4513	15.18	15.0454	14.494	15.4424	14.5393	15.1254	15.1395	16.1024	15.9332
OGN	1	EMT	1.65553	2.00337e-05	1.84024	8.06653e-05	NA	17.8708	12.6714	13.2675	15.9419	15.1325	13.7288	14.314	16.0078	14.0737	13.4598	13.3032	11.1555	14.7914	13.7576	12.7742	12.2851	12.6487	17.0342	13.3023	12.6187	14.1399	13.0592	11.0026	12.3354	13.3132	11.7716	13.6933	12.716	12.7859	12.2195	13.9819	18.3679	15.2585	13.2576	11.2953	12.4049	16.1931	10.5786	13.0965	13.4769	14.735	14.9005
HSPB6	not-sig	not-sig	#N/A	#N/A	#N/A	#N/A	NA	11.7307	10.8291	10.0717	12.2962	11.3924	10.2222	8.12581	12.4399	10.0984	10.6447	11.249	11.721	13.126	11.71	11.0305	10.5099	9.27325	15.4744	10.9544	10.5816	9.8873	11.2191	8.63186	10.0921	10.6586	10.1568	9.40685	10.5096	9.32684	11.0801	11.1108	12.2861	12.1773	14.0462	9.28658	11.3319	13.247	2.33999	11.811	10.1763	13.3701	13.3055
TMEM214	not-sig	not-sig	#N/A	#N/A	#N/A	#N/A	NA	14.9713	14.698	15.0291	14.9237	15.1449	14.6616	12.2188	15.1029	15.0131	15.2676	15.0133	15.1043	15.251	14.92	14.9314	14.8917	14.7477	15.2631	14.9124	14.8098	15.013	14.9033	14.8692	15.0414	15.12	14.7001	14.6993	15.2237	14.9938	14.5644	14.9743	14.86	15.064	15.1356	14.6589	15.3024	14.9497	15.2769	14.8659	14.9129	15.0937	15.1028
ZMPSTE24	not-sig	not-sig	#N/A	#N/A	#N/A	#N/A	NA	13.0406	13.4613	12.638	11.7001	13.2517	12.7477	13.9731	12.1857	13.1084	12.342	12.5527	12.4943	12.5829	12.8075	12.9757	12.6479	12.794	14.4152	13.3315	12.5579	12.4943	11.7626	12.8823	13.3056	12.8447	12.5932	12.4662	13.1187	12.9552	13.7043	13.0699	13.1938	12.715	13.1627	13.4352	12.1121	13.1608	11.735	12.9179	12.6383	13.1141	12.9059
PRELP	1	EMT	1.36579	0.000172307	1.88353	0.000376861	YES	17.3571	12.8302	13.6052	15.5604	14.822	12.8365	17.2978	16.235	13.4885	13.442	13.5143	12.6449	15.6957	12.8353	12.0876	11.3301	11.5411	17.3595	12.6718	12.4513	13.0667	15.1711	10.8905	11.7568	11.7285	11.6187	10.8076	13.4404	12.7046	12.8178	13.0952	15.4986	14.3943	11.6325	12.0787	13.3108	15.1357	10.9261	12.1162	13.9026	14.9647	15.0437
CELF2	not-sig	not-sig	#N/A	#N/A	#N/A	#N/A	NA	14.2065	14.2291	14.0154	14.3823	14.1014	13.6896	16.5189	14.0184	14.4103	13.7821	14.1063	13.9615	13.3844	14.1567	14.117	14.3305	14.3175	14.2499	14.5726	14.0667	14.6469	14.3313	14.4091	14.3784	13.8347	14.374	14.2439	14.6157	14.3841	14.6781	14.5568	14.4509	14.7038	14.284	13.6364	14.1683	13.9271	13.7459	14.6396	14.3047	14.5453	14.7169
ACSL3	not-sig	not-sig	#N/A	#N/A	#N/A	#N/A	NA	15.0846	14.696	14.9892	14.6268	14.8268	14.4811	16.3394	16.0511	14.8757	15.6621	15.5663	15.0356	14.8399	15.0591	16.1654	15.3584	15.701	16.0666	15.5547	15.2738	15.0846	15.0115	15.4808	15.358	15.5754	15.4819	15.4603	16.0719	16.3886	15.423	16.1699	15.2152	15.2855	15.2103	16.4586	16.2548	15.0114	16.1147	15.635	16.1074	15.8256	15.501
PSME4	not-sig	not-sig	#N/A	#N/A	#N/A	#N/A	NA	12.4777	13.3114	13.5615	10.7875	12.4708	13.6753	13.3194	13.8824	12.0432	13.6672	13.4733	13.6931	13.5252	14.0957	12.472	13.1756	13.0164	14.2421	13.0969	13.2635	13.4844	14.5046	13.0141	12.6708	13.5005	13.4675	10.0036	13.1475	12.7224	14.1826	13.5143	11.8072	13.4035	12.4589	12.7463	11.3256	12.7275	13.4318	13.0565	13.5791	13.788	13.5595
EIF5B	not-sig	not-sig	#N/A	#N/A	#N/A	#N/A	NA	15.11	15.5369	15.8925	15.1815	14.1042	15.9678	14.9614	13.3311	15.4002	15.8363	15.632	15.5941	15.4139	15.214	15.5392	15.6384	15.6744	14.9509	15.8679	15.9562	15.7524	15.5923	15.3898	15.8105	16.2501	16.3082	15.9328	16.1415	15.1181	15.3425	15.6417	15.4968	15.4637	15.6189	15.7746	15.8105	15.8435	14.8969	15.3183	15.5975	14.3553	14.7627
RHOG	not-sig	not-sig	#N/A	#N/A	#N/A	#N/A	YES	12.5639	12.8893	13.1491	13.1092	14.62	13.0234	13.6811	14.3168	13.6626	14.5302	13.4366	13.6237	13.4228	13.7284	13.8717	13.3613	13.382	14.6967	13.9412	13.4669	13.072	14.9482	13.5194	14.1923	13.7557	12.9077	13.478	14.1199	13.0821	13.5317	13.0732	13.1049	14.4684	14.4748	14.673	13.3773	13.6695	14.449	14.4651	13.3182	14.7707	14.0919
SYNRG	not-sig	not-sig	#N/A	#N/A	#N/A	#N/A	NA	13.5552	12.2969	13.536	12.4872	12.4933	14.3181	13.4495	12.8821	12.1385	13.994	14.5794	14.4007	14.6604	13.8408	13.1081	13.0598	14.1978	11.5015	14.4035	13.9972	14.7183	13.9627	14.0678	13.8569	14.582	14.3171	14.0204	14.3089	13.9984	12.4281	13.1486	13.5929	13.7451	14.4797	15.49	13.9633	14.5816	14.0261	14.3029	14.2803	12.3845	11.9645
CASP4	not-sig	not-sig	#N/A	#N/A	#N/A	#N/A	NA	11.9573	11.5656	11.0412	10.5856	10.7514	10.9113	11.0094	11.7737	11.9447	10.9522	11.7117	10.9078	10.8193	11.1992	11.3945	11.2616	11.7881	12.2312	10.7679	10.8863	11.5639	12.4317	11.6725	12.0563	11.7364	12.1632	11.3405	11.9633	11.621	13.1126	11.8012	11.7619	11.0309	11.8062	11.6192	11.8096	10.5578	12.6565	12.1046	11.5215	11.1084	11.8974
TCIRG1	4	IMMUNE	#N/A	#N/A	#N/A	#N/A	NA	14.772	14.2948	14.6259	14.581	14.7559	14.3578	12.571	15.1192	14.192	14.5717	14.4064	14.5721	14.4655	14.5581	14.5605	14.5495	14.6285	15.296	14.7771	14.2301	14.1839	15.2235	14.253	14.68	14.5192	14.6089	10.544	14.7766	14.2725	14.5233	13.996	14.8691	13.9982	14.9455	14.3765	14.0622	14.7873	15.1369	14.7185	14.329	14.9054	14.8957
ERH	not-sig	not-sig	#N/A	#N/A	#N/A	#N/A	NA	13.6142	14.0916	14.2931	13.9594	14.1793	14.2076	16.404	13.5296	14.298	14.0962	14.0512	14.2937	12.7721	13.9509	14.7305	14.2008	14.3741	12.655	14.3657	14.4994	14.5303	13.9189	14.6083	14.462	14.341	14.9823	14.6981	14.5703	14.8074	14.5252	14.9102	14.4505	15.7817	14.2903	13.8795	15.186	14.0294	14.5107	14.4891	14.6089	13.5735	14.1638
KDM2A	not-sig	not-sig	#N/A	#N/A	#N/A	#N/A	NA	13.5083	12.6311	13.7418	12.2492	13.2638	12.6884	12.9112	12.748	12.8413	12.7974	13.6126	13.3557	12.7211	13.385	13.7063	12.5003	13.2501	11.9763	14.0263	13.0128	13.9375	13.2804	13.6035	13.7718	13.0478	13.6125	13.7906	13.7003	13.4581	11.5646	12.9572	13.0166	14.5364	13.9805	13.4802	13.466	12.7172	12.1145	13.2815	14.0308	12.0015	12.1451
MAD2L1	not-sig	not-sig	#N/A	#N/A	#N/A	#N/A	NA	14.0406	13.7527	13.9799	13.864	14.5221	14.2862	17.309	13.869	14.6337	13.1377	14.1532	14.1718	14.0958	13.6005	14.4317	13.8603	14.2304	14.6323	13.7911	13.8936	14.3943	14.2296	13.7801	14.0581	14.4752	13.6597	14.4911	13.6179	14.2206	14.0261	14.1949	13.3685	14.7841	13.5509	13.6037	14.7047	13.3156	14.5598	14.1389	13.6203	13.7705	13.6891
CDC123	not-sig	not-sig	#N/A	#N/A	#N/A	#N/A	NA	12.409	13.1071	12.7126	13.2032	13.7795	12.5674	13.6904	12.6097	13.6474	13.535	12.5252	13.1493	13.6314	12.9131	13.3197	12.8764	13.6244	14.1221	13.9858	13.3171	13.6136	13.1462	12.5155	12.738	13.3163	13.3318	15.7548	13.268	12.5394	12.9754	13.2527	12.0768	16.5612	14.0915	13.724	13.2038	12.9636	11.9893	13.2479	12.796	13.4376	12.776
PKN1	not-sig	not-sig	#N/A	#N/A	#N/A	#N/A	NA	14.8245	11.7074	15.8728	13.2564	16.7216	15.4813	13.3434	15.2012	16.5805	12.1071	15.9047	15.6589	14.9224	16.0252	15.007	15.598	16.1707	15.0756	16.3613	16.3978	14.7278	16.8296	15.707	15.9147	16.2907	15.0691	17.8808	14.7431	15.2718	17.3636	16.4806	16.7101	12.9703	12.3308	12.1117	14.5393	15.8885	13.0303	16.3932	15.9297	18.3262	8.80625
FDFT1	not-sig	not-sig	#N/A	#N/A	#N/A	#N/A	NA	13.1975	13.2417	13.616	12.6004	14.0422	12.4878	11.6784	12.6195	13.4889	13.4316	13.1551	12.9059	13.3351	13.2321	13.3198	12.1565	12.1531	16.0739	14.0074	13.4685	14.1052	13.1233	13.9998	12.8076	14.4781	14.0507	13.677	14.442	14.2384	13.3334	14.6193	14.2575	13.2345	13.0264	13.833	14.6559	12.7565	14.7067	13.6835	12.8358	13.8178	12.589
PCBP1	not-sig	not-sig	#N/A	#N/A	#N/A	#N/A	NA	17.181	17.2753	17.7597	17.04	16.0557	17.3337	15.9036	17.1708	17.1523	16.7701	17.6875	16.2335	17.5766	17.2051	17.3005	17.4929	17.2929	15.9299	17.1705	17.2377	17.7611	16.728	16.9062	16.1746	17.697	17.6378	17.4836	17.6519	17.3476	16.987	17.0838	17.3816	18.0761	17.2361	17.5514	17.3176	17.0689	17.3768	17.1566	17.6586	16.9211	16.3539
DHCR7	not-sig	not-sig	#N/A	#N/A	#N/A	#N/A	NA	12.4442	14.0133	12.6974	12.7634	13.0014	12.9189	13.9024	13.2077	13.7158	13.0871	13.1261	12.3536	13.1609	12.4805	13.3062	12.2482	12.4167	13.0654	12.7315	13.3763	12.7637	12.2934	13.9222	12.7731	11.9617	14.1054	12.322	13.1334	13.9062	12.9774	14.2813	14.522	13.4487	13.024	13.9643	13.3783	12.0702	13.0493	13.1984	14.0622	12.8127	11.762
F13A1	not-sig	not-sig	#N/A	#N/A	#N/A	#N/A	NA	13.9938	15.6949	14.7706	15.405	15.2436	13.4443	17.9117	15.1352	14.4396	14.4661	13.9337	13.8844	15.0064	14.1195	13.5496	13.3389	13.8079	15.0289	14.4484	13.7439	13.4814	15.1119	14.2457	14.2053	14.1399	13.0391	13.8849	13.4322	13.7993	13.5011	13.9112	15.187	13.8516	14.7565	14.1672	13.372	13.8841	15.0802	14.5678	13.8361	16.0476	16.3299
WARS1	not-sig	not-sig	#N/A	#N/A	#N/A	#N/A	NA	14.9147	15.4141	15.0592	15.9105	14.7015	15.7483	16.5037	15.1883	15.4899	16.4548	15.8961	16.0252	16.0374	15.4615	16.5554	15.2197	15.2968	17.715	17.2994	15.1696	15.4779	15.8507	15.8069	15.9498	15.9191	14.7561	16.0043	16.981	16.1366	16.0652	15.1822	15.9907	15.7191	16.5203	15.9183	16.1578	15.8802	16.5335	16.0397	16.03	15.7071	15.0747
ODR4	not-sig	not-sig	#N/A	#N/A	#N/A	#N/A	NA	12.54	12.2181	12.3453	12.213	12.0084	12.2328	11.9339	12.2725	12.7926	12.3618	12.1467	12.6196	11.9695	11.5343	12.3797	15.6927	12.9903	12.2987	12.3716	12.8598	12.7408	12.5308	12.2663	12.3327	12.1994	11.7119	11.2041	12.3214	12.347	12.888	12.8874	12.5129	11.3912	12.234	13.0248	13.2853	13.1275	12.8812	12.9593	13.1477	12.2438	11.4619
PURA	not-sig	not-sig	#N/A	#N/A	#N/A	#N/A	NA	15.0222	14.8354	14.3129	15.2834	15.5417	14.2009	13.714	14.7313	14.3483	15.4387	14.4789	14.0765	14.8698	14.0628	14.3562	14.1793	14.2249	14.9565	14.4442	14.1797	14.4354	14.3118	14.1136	13.8537	13.9561	14.0286	14.9742	14.0423	14.1132	16.2335	14.5837	15.434	14.6363	14.1681	14.2893	13.7612	14.2299	13.8935	14.1345	14.4886	14.3679	15.7057
SLC35B2	not-sig	not-sig	#N/A	#N/A	#N/A	#N/A	NA	14.1556	13.8914	14.2215	13.3187	14.0943	13.9098	14.6067	14.2676	13.8792	14.7706	14.0133	14.1747	13.3517	13.8141	14.6922	13.6416	13.9106	13.1397	14.1616	14.205	14.0291	14.1215	13.6464	14.3074	13.8153	14.2019	13.6082	13.923	14.4288	13.4815	14.5307	14.6374	12.1781	13.7248	14.5977	14.4857	14.1222	14.2492	13.9716	15.4137	13.0639	14.2062
CSTF2T	not-sig	not-sig	#N/A	#N/A	#N/A	#N/A	NA	13.4954	13.7107	14.004	13.5602	13.7986	14.2109	16.8914	12.9306	13.9747	13.953	13.8278	13.7885	13.2262	13.5631	13.9629	13.6674	13.6746	13.9179	13.8364	13.9983	14.4427	13.3081	13.8724	14.0941	14.1993	14.122	14.0889	13.619	13.9772	14.1217	14.0518	13.6141	14.544	13.8907	14.1388	14.0603	13.6963	13.8595	13.7529	13.9004	12.9529	14.465
C9	4	IMMUNE	#N/A	#N/A	#N/A	#N/A	NA	15.561	15.9027	15.7726	16.5691	16.8798	14.6764	17.7335	17.4819	15.4619	15.0985	15.3057	15.3279	16.1708	15.0759	15.1425	14.1167	14.5138	16.1895	15.2858	15.9054	14.9362	16.6631	15.1917	15.942	15.0284	15.476	16.8719	15.1589	14.327	15.1768	15.2678	15.7321	17.1142	15.5014	15.1557	15.8602	14.9423	15.8347	15.9958	15.9501	15.9279	16.2063
ZDHHC5	not-sig	not-sig	#N/A	#N/A	#N/A	#N/A	NA	12.943	12.9524	12.2195	12.7455	12.2922	12.8612	13.8566	11.9238	12.701	12.5806	13.8187	12.7597	12.3847	12.9733	12.4516	12.9119	13.4507	12.0912	13.2991	12.3961	13.3547	13.0402	13.6604	13.0574	11.7874	13.3771	12.84	12.784	12.9113	13.122	13.2536	13.5836	12.6552	13.7015	13.9203	12.5849	13.1971	13.14	13.5361	13.4059	11.8549	12.757
RPS21	2	METAB	#N/A	#N/A	#N/A	#N/A	NA	13.8762	13.9866	14.0262	13.5874	12.1762	13.5216	16.1762	13.1543	14.0753	14.4115	13.966	14.0779	13.6422	13.5602	14.0224	14.1841	13.8822	14.7474	14.0272	14.3108	14.3703	13.6572	14.1468	14.152	14.6945	14.2233	14.0444	14.2558	14.2203	14.0715	14.2947	14.1525	15.6931	14.1488	14.0726	14.0666	13.9098	14.0441	14.2209	14.275	13.7886	13.5743
NOLC1	not-sig	not-sig	#N/A	#N/A	#N/A	#N/A	NA	15.7448	14.6999	16.0846	16.3093	15.6708	16.505	15.3106	15.6659	16.6965	15.0128	15.6649	16.3517	14.9537	15.8817	16.8483	16.0863	16.3537	15.8661	16.6009	15.8962	16.7138	16.3038	16.0796	16.5391	15.1841	16.7376	16.2761	16.4116	15.9211	16.4275	16.7999	16.0307	16.3321	15.9529	16.4623	16.6381	15.5805	15.0946	16.2059	15.8732	15.7415	15.811
NCBP1	3	CANONICAL	#N/A	#N/A	#N/A	#N/A	NA	15.466	14.8442	15.2054	14.5669	16.0367	16.22	15.6228	14.7422	15.2805	15.1855	14.9198	15.5084	15.1383	15.215	14.3155	15.1324	15.4072	16.143	15.3161	14.8233	14.9635	15.0808	15.0959	15.2417	14.9886	15.6965	15.2608	14.9678	15.2509	15.4337	15.3674	15.1239	15.4564	15.1713	15.6034	15.2258	15.3973	15.7378	15.1459	14.9607	15.1143	15.2452
SERPINA4	not-sig	not-sig	#N/A	#N/A	#N/A	#N/A	NA	14.6338	14.8329	14.4525	15.1859	14.5757	13.459	13.3672	14.0656	13.8892	13.7752	14.0362	14.2836	12.4854	14.7683	14.6002	12.3472	14.9561	14.1032	15.0699	14.6748	14.4727	15.4483	14.6315	14.8765	14.2376	14.7983	12.7857	13.8168	14.6062	14.2596	13.5856	15.1452	13.8586	14.1407	13.8651	14.338	14.1697	13.5929	14.6835	14.7463	13.6411	13.9799
SHROOM2	not-sig	not-sig	#N/A	#N/A	#N/A	#N/A	NA	12.7698	12.8911	13.423	13.1401	15.3356	14.1016	14.7024	13.6613	13.9959	13.4319	13.5282	13.6099	12.9522	13.61	13.4821	13.0828	13.7132	12.1914	13.5695	13.3893	12.5072	12.3615	13.1787	14.178	13.7889	13.1455	13.9922	12.8296	13.2229	13.6055	13.2662	12.7544	13.3473	12.031	13.5361	13.9454	13.9729	14.614	11.9019	12.5687	14.2579	13.4188
NPEPPS	not-sig	not-sig	#N/A	#N/A	#N/A	#N/A	NA	16.5621	16.1055	15.8778	16.3085	15.8221	15.9202	15.0852	15.745	16.0295	15.7392	15.974	16.0143	15.8758	15.9487	16.1244	16.1515	16.3054	16.8608	15.6334	16.0609	16.8115	15.7933	16.0543	15.9757	16.4576	16.2627	15.8475	16.1274	16.1632	15.8742	16.7631	16.007	16.4839	15.9962	16.291	15.6562	16.0909	15.9652	15.8776	15.7727	15.9479	15.8264
SQSTM1	not-sig	not-sig	#N/A	#N/A	#N/A	#N/A	NA	12.8721	12.6952	12.6364	15.1482	15.4143	12.55	13.4098	13.8095	13.7854	12.4814	13.2188	13.1898	12.1205	13.3888	14.6699	13.5704	13.3357	12.2212	12.8258	12.2673	12.6293	14.4158	13.3684	13.9273	12.3001	11.7638	11.304	12.2877	12.8505	12.6192	12.6192	12.6816	15.4533	13.681	12.961	13.5882	13.9717	13.2239	13.4105	12.5329	15.1762	13.3805
DDX50	not-sig	not-sig	#N/A	#N/A	#N/A	#N/A	NA	13.4031	13.6876	13.9372	14.0249	13.011	13.8766	14.6921	13.5684	14.2831	13.8708	13.6337	13.6065	15.8852	13.5612	12.8039	13.6001	13.1744	13.806	14.1854	13.3477	13.7782	14.0882	13.3812	13.6488	14.376	14.7132	14.7864	13.6548	13.2982	13.2388	13.5779	13.1431	14.2156	14.091	13.5667	14.374	13.3446	13.4406	13.641	13.5294	13.5087	12.9456
SHPK	not-sig	not-sig	#N/A	#N/A	#N/A	#N/A	NA	13.6009	14.962	14.2219	14.112	11.8499	14.2036	14.6336	14.8512	11.5924	12.4868	10.5936	11.5779	13.0991	15.206	13.6104	12.4897	12.7576	13.2444	14.3491	14.2111	14.4056	14.8115	14.2294	11.7516	11.2059	14.194	16.0714	12.1583	13.9961	11.0037	12.4739	15.568	17.0647	12.7878	12.372	12.7914	10.8954	11.4237	13.0422	14.5519	11.6903	15.7214
YTHDC2	not-sig	not-sig	#N/A	#N/A	#N/A	#N/A	NA	11.8737	13.0239	12.6642	13.3858	11.6788	13.4739	13.3313	12.5154	11.5903	12.9408	11.7914	12.9365	13.1458	13.3813	13.2251	12.4302	12.9446	11.453	12.7161	12.6213	12.8363	11.4191	12.8273	12.7434	13.428	12.4326	6.8484	12.6817	12.8764	11.8225	12.0345	12.8101	16.0096	11.3471	11.6256	11.8367	11.3164	10.7319	13.1321	12.6276	12.456	12.8309
LMNB2	not-sig	not-sig	#N/A	#N/A	#N/A	#N/A	NA	15.6274	15.5842	15.5409	15.9607	16.075	16.3748	15.6544	15.6742	15.9971	15.6608	15.8367	15.8602	16.0321	16.0339	15.8346	15.7244	15.7033	14.8824	16.1932	16.2103	15.7198	15.7989	15.5748	15.8783	15.9218	16.0607	15.8733	15.9511	15.9011	15.8426	15.9786	16.0627	14.4072	15.6456	15.8225	15.9665	16.4214	15.5969	15.7918	15.917	16.0967	16.1873
BCKDHA	not-sig	not-sig	#N/A	#N/A	#N/A	#N/A	NA	13.8843	15.918	15.0069	13.4036	13.6743	13.071	15.488	12.2185	13.2299	15.2525	14.1732	12.9987	15.422	13.1317	13.3223	12.9436	13.255	13.6072	12.725	15.1924	12.3406	12.0419	13.6906	13.2417	12.7122	14.3286	13.1845	12.9067	13.1957	13.9756	13.2454	13.408	13.8685	13.1419	13.3547	13.2438	13.3974	13.1565	13.3363	13.1684	13.4604	13.0239
RRM1	not-sig	not-sig	#N/A	#N/A	#N/A	#N/A	NA	12.3053	13.5706	14.3234	13.8331	14.1061	13.656	13.0711	13.9837	14.9719	13.3926	13.2447	14.276	13.8888	14.4285	15.0025	12.8929	14.1456	14.894	14.4719	13.6898	14.0707	13.2741	14.0322	12.705	14.3101	14.2204	14.4516	13.7457	14.9949	13.4955	13.9955	14.084	14.9892	13.9935	13.2123	14.9557	13.5384	14.7498	13.5784	13.3634	13.1583	13.594
STAMBPL1	not-sig	not-sig	#N/A	#N/A	#N/A	#N/A	NA	12.6388	12.2962	12.1401	12.0359	10.448	12.3826	11.1073	12.7275	12.4801	13.2157	12.7714	11.5186	13.2325	11.8945	12.4236	12.3891	13.1346	10.8521	11.3459	12.0885	12.3203	12.8013	11.9037	11.7773	12.0668	12.3237	10.6087	11.9497	11.5998	12.5428	11.9657	11.9539	13.006	12.6365	12.3956	11.8021	13.1233	11.1566	11.6901	11.9133	11.5175	12.8647
PRKCA	not-sig	not-sig	#N/A	#N/A	#N/A	#N/A	NA	12.4803	13.2702	12.7605	12.5825	11.3681	12.0672	11.7819	11.8688	12.9854	12.7067	12.3909	12.6593	13.9721	12.5512	12.1315	12.8845	12.576	14.0545	12.28	11.9936	12.3457	13.6248	12.6347	12.6682	12.9184	12.6686	12.5694	12.1173	12.9819	12.6028	12.7228	12.4415	13.3874	13.4984	13.4077	13.1327	13.1467	12.6735	12.7117	13.5166	13.5046	13.5349
TIMM44	not-sig	not-sig	#N/A	#N/A	#N/A	#N/A	NA	14.2663	14.819	14.9299	14.8666	15.6946	15.8296	12.182	14.9538	15.5321	15.9647	15.065	15.2588	15.634	15.331	15.0724	15.1379	15.0363	14.9663	15.1686	15.0261	14.3671	14.6003	15.0421	14.8956	15.1084	15.0713	15.2846	15.0664	15.2264	15.0744	15.0149	14.7475	14.8778	14.5581	14.7476	14.1027	15.6046	14.7221	14.8173	14.8769	14.2357	14.4673
CEPT1	not-sig	not-sig	#N/A	#N/A	#N/A	#N/A	NA	16.254	16.4754	15.9365	16.1283	16.9023	15.7569	13.3736	16.1965	16.3116	15.1522	16.0758	14.8501	16.0754	16.1648	16.069	16.6453	16.542	14.8378	15.8644	16.5655	16.4876	14.7811	16.538	15.9795	16.3039	16.6322	16.4879	16.5147	15.7111	16.5291	16.2497	15.444	15.4798	16.6013	15.2336	16.4931	14.6159	16.5324	16.6594	16.2244	16.0095	16.4338
ACP2	not-sig	not-sig	#N/A	#N/A	#N/A	#N/A	NA	14.6049	14.5923	14.7595	15.1037	14.8687	15.16	13.1786	14.0202	14.6318	14.9672	14.8658	15.0324	14.8757	14.9814	14.9824	14.2806	15.1668	13.6023	15.0122	14.5313	14.3973	15.0196	14.9523	14.8707	14.8462	14.6136	14.6032	15.634	14.793	15.3666	14.8639	14.9648	15.2112	15.45	15.0721	14.8455	14.7943	14.9406	15.2076	14.6227	14.9094	14.957
ANP32A	not-sig	not-sig	#N/A	#N/A	#N/A	#N/A	NA	15.5844	15.2475	15.1944	15.754	16.5561	15.5971	16.4781	15.2834	15.3964	14.7256	15.524	14.8023	14.7864	15.7124	16.1249	15.462	15.9614	15.8433	15.172	15.2897	16.5867	15.2613	16.194	15.3038	15.3239	16.6823	16.3779	15.7806	16.3868	16.4576	16.2602	15.7942	16.5967	16.3421	15.0921	16.6466	15.6689	16.0074	15.9124	16.3413	15.852	16.1428
RPS2	not-sig	not-sig	#N/A	#N/A	#N/A	#N/A	NA	16.4583	15.9861	16.4362	16.158	15.5635	16.0085	15.7959	16.2501	16.398	16.1348	16.2258	16.1915	14.8911	16.1773	16.5079	16.2976	16.4736	16.4829	16.2142	16.1798	16.7024	16.3047	16.3923	16.3393	15.765	16.5943	16.3542	16.5097	16.5969	16.6525	16.5487	16.2262	16.2627	16.5365	16.3272	16.4984	15.2398	16.0925	16.51	16.5299	16.5339	16.2614
TEX264	not-sig	not-sig	#N/A	#N/A	#N/A	#N/A	NA	14.4512	13.1085	14.2021	14.2113	14.7847	13.5935	14.6706	14.3618	14.0373	13.3522	13.1549	14.4015	12.5294	14.1852	13.9943	14.0698	14.1003	12.0759	13.9947	13.9372	14.4735	14.4331	14.739	14.4128	13.499	13.9037	14.222	14.5002	14.6889	14.4615	14.6839	14.2689	13.6218	14.4738	14.4266	15.0476	13.4999	14.2283	14.6578	14.4125	14.4986	14.334
RUFY1	not-sig	not-sig	#N/A	#N/A	#N/A	#N/A	NA	14.5732	14.2925	13.927	13.8341	13.3012	13.9594	12.683	14.2115	13.7379	14.3696	14.1157	13.8124	14.2983	13.9193	14.299	14.5964	13.0218	14.4239	14.6315	14.1282	13.7191	13.9456	13.7562	14.1801	14.0125	13.2102	13.6569	14.2719	13.877	13.2872	12.8372	13.9633	14.2863	13.8518	14.5474	13.6269	13.9724	13.6187	13.9111	12.9597	13.7544	13.6556
DYNC1I1	not-sig	not-sig	#N/A	#N/A	#N/A	#N/A	NA	13.9754	14.4431	13.9745	14.5863	12.6524	13.5771	13.159	14.4391	13.182	13.0779	14.2606	11.8003	14.0662	13.8302	14.2204	13.6916	11.4092	13.8296	13.5172	13.9608	13.7161	12.5488	14.1508	14.7121	13.9092	13.1016	12.0434	12.8831	13.952	12.6563	12.9463	14.2659	12.5185	13.7114	12.4536	13.8804	12.5471	13.9468	14.1542	14.2025	12.6716	12.12
EIF3E	not-sig	not-sig	#N/A	#N/A	#N/A	#N/A	NA	14.6078	14.7926	15.3382	14.6242	14.4327	15.5968	15.7726	15.263	15.7689	15.4002	15.3618	15.0545	14.9134	15.0639	15.2984	15.433	15.3034	15.893	15.4211	15.0122	15.6254	14.9258	14.9518	15.2306	15.3071	14.7479	14.6986	15.318	15.622	15.2903	14.9528	15.0287	14.6887	14.9792	15.4769	15.1425	14.3657	15.0012	15.145	15.3607	14.5575	14.7912
TMEM33	not-sig	not-sig	#N/A	#N/A	#N/A	#N/A	NA	14.6485	14.6555	13.9342	14.1457	14.6917	14.2582	14.003	14.8188	14.0503	13.9872	14.3657	14.0049	13.9697	13.8287	13.8964	15.6276	14.62	13.8202	15.6194	14.3768	14.0596	14.4834	13.8853	14.6531	13.5979	15.6946	14.737	14.4885	14.9658	14.0051	15.1338	14.4686	14.5269	15.6048	16.3515	14.3622	14.7106	15.0709	14.3031	14.4342	15.9635	14.3548
ANP32B	3	CANONICAL	#N/A	#N/A	#N/A	#N/A	NA	17.3988	16.7954	17.345	17.5986	18.2439	18.1361	17.1986	17.3945	17.5816	17.3799	17.5076	16.5902	16.6152	17.6066	17.6797	17.4709	17.558	17.265	17.7691	17.8179	17.7786	17.1661	17.6603	17.2854	17.139	17.8615	17.874	17.6769	17.8176	17.8201	17.584	17.3505	16.6638	17.2274	16.6571	17.6889	16.5314	17.6853	17.7708	17.995	17.5354	17.3318
PSMA1	not-sig	not-sig	#N/A	#N/A	#N/A	#N/A	NA	15.3869	15.2839	15.1054	15.0341	14.4277	15.0652	16.7097	14.905	15.291	15.3941	15.328	15.7655	14.2435	14.955	15.0817	14.9078	15.1195	15.9521	15.2157	15.3858	15.3033	15.3034	15.2034	14.9384	15.1724	15.0848	15.3126	15.4405	15.2805	15.2789	15.1299	15.412	15.6616	15.6812	15.4268	15.6707	15.3641	15.4587	14.9778	14.6997	14.9529	15.0885
DSG2	not-sig	not-sig	#N/A	#N/A	#N/A	#N/A	NA	15.2157	15.2225	15.2282	14.6725	15.2004	15.3808	14.1091	15.007	14.8465	15.4953	15.1847	15.3794	14.0466	15.4959	15.4344	15.5663	15.5304	15.4855	14.7966	15.5144	15.786	14.705	15.8353	15.9181	15.1946	15.7197	15.4981	15.5531	15.7801	15.3839	16.026	15.6061	15.5095	15.6911	16.0924	15.5685	14.7808	15.4509	15.5929	16.7281	15.6152	15.0583
TCEA1	not-sig	not-sig	#N/A	#N/A	#N/A	#N/A	NA	13.0851	13.9602	13.2927	13.6599	14.1087	13.3013	16.4757	13.2416	12.7716	13.7818	14.2838	13.5861	14.2526	13.4043	13.6583	13.2097	13.5171	13.678	12.9729	13.1026	14.3204	13.5218	14.0675	13.6662	13.668	14.0176	13.82	13.3665	13.7835	13.8179	13.6518	13.3418	14.3434	14.2082	14.246	14.368	12.7129	13.8896	13.5195	13.9021	13.8227	13.7425
ACBD3	not-sig	not-sig	#N/A	#N/A	#N/A	#N/A	NA	14.5934	14.7576	16.2584	15.8453	15.5273	15.7575	12.5966	14.4185	15.186	15.0999	15.54	14.8318	15.3689	14.5779	14.5731	14.7217	15.046	15.701	15.457	15.0793	15.3615	16.3683	14.7039	15.1774	15.2004	14.6204	15.1155	14.3393	15.4828	14.904	15.0022	14.6925	14.0672	14.4819	14.6912	15.0216	14.3093	15.1936	14.3774	14.5274	15.1593	14.6306
GUSB	not-sig	not-sig	#N/A	#N/A	#N/A	#N/A	NA	15.346	16.8473	15.1074	14.8435	14.2473	14.7238	20.6228	13.5059	13.6885	14.6873	13.4704	13.8907	14.0734	14.3433	13.2314	14.0752	12.8349	14.1913	13.6332	15.0679	11.9143	13.3562	14.5183	12.4458	12.7767	14.8955	13.9677	14.5512	13.5015	14.0701	13.9235	13.1416	13.569	14.0378	14.0293	12.3984	13.5346	13.5696	14.2454	13.4094	14.5091	14.2575
ADNP	3	CANONICAL	#N/A	#N/A	#N/A	#N/A	NA	13.83	13.7052	15.3349	14.7758	15.4252	13.8089	11.5825	14.274	15.0591	13.2488	13.568	15.3651	14.8655	14.8445	15.5205	15.161	15.2172	12.5648	15.4563	15.1761	15.3738	15.3609	13.233	14.4483	15.1949	15.1589	15.5661	14.8977	15.0808	15.1827	15.0984	14.7288	14.1956	13.6288	15.1232	14.5273	14.6512	14.0482	14.4801	14.6974	13.53	13.5977
HSPA12A	not-sig	not-sig	#N/A	#N/A	#N/A	#N/A	NA	14.0911	12.3082	12.6771	13.1021	12.1245	14.0558	11.7843	14.2646	12.6428	12.8703	11.6405	11.7088	13.4038	12.1777	11.434	12.2815	11.9086	14.1623	12.1041	11.5511	11.3078	12.7149	11.231	10.593	12.5152	11.8568	14.2177	11.9188	11.6694	11.971	12.2117	11.6271	11.2513	11.5085	12.0216	10.2576	12.9549	12.3407	11.1368	11.7194	12.5292	12.3112
UGT8	4	IMMUNE	#N/A	#N/A	#N/A	#N/A	NA	12.2716	13.3624	12.8145	11.8361	13.2464	12.0888	12.5068	13.1871	12.5152	12.5158	12.2815	13.0296	12.3298	12.7415	13.0119	12.5715	13.2293	12.7176	13.1588	13.4727	12.8105	12.2909	13.1158	13.2272	12.7969	11.9009	13.3311	12.2561	12.8238	12.999	13.0177	12.765	8.66817	13.3821	12.7176	14.1796	13.0557	13.8626	13.3601	13.1207	14.4257	13.2585
BCAP31	not-sig	not-sig	#N/A	#N/A	#N/A	#N/A	NA	17.7572	15.0626	16.1324	16.0534	16.8988	15.5063	15.8617	15.3418	16.1033	16.0583	14.8671	16.3436	14.5019	15.75	15.7471	16.0585	16.0035	14.4614	15.7628	15.9579	16.0414	15.2424	16.8108	16.007	15.3888	16.4613	15.9594	16.318	16.1489	15.9319	16.9702	16.3373	16.0713	16.1586	15.5146	15.9004	16.3578	15.9513	15.9625	16.6517	16.0431	16.3892
VEZF1	not-sig	not-sig	#N/A	#N/A	#N/A	#N/A	NA	13.2689	12.6509	12.5905	12.6733	11.4003	12.9446	11.9465	12.6093	11.6889	11.2916	11.8616	11.8678	12.3165	12.443	12.098	12.4762	11.9832	9.19	12.0691	12.7321	12.6009	11.4634	11.3285	12.2088	12.9424	12.6594	11.8724	12.2749	11.9019	11.3525	12.1737	11.7818	10.7991	11.8689	12.2918	13.199	11.7956	10.6084	11.4246	11.6138	11.1017	11.6743
APOA4	not-sig	not-sig	#N/A	#N/A	#N/A	#N/A	NA	14.7366	15.104	14.2563	14.9329	15.4241	14.1012	10.8516	16.0952	15.2311	14.042	13.8336	13.6574	13.2507	14.6789	14.7413	13.4151	14.762	14.8591	14.5977	14.1475	14.1753	15.5268	14.3305	15.4861	13.9183	14.3167	14.0393	14.459	14.3253	14.4308	14.0298	15.3011	13.4135	15.0906	14.454	15.1564	14.8601	14.9759	14.9563	14.1663	16.0987	15.8925
MRPS7	not-sig	not-sig	#N/A	#N/A	#N/A	#N/A	NA	12.0164	13.587	12.2551	13.5192	10.9827	14.0986	12.6561	11.5789	13.294	13.7599	12.8757	12.206	13.2803	14.1954	13.1799	13.4196	13.5482	12.9742	13.2001	13.1672	13.4638	12.2098	11.9412	12.1557	14.1304	12.9814	13.4321	13.5698	13.6513	14.0367	12.6814	12.9828	15.1315	12.3583	13.0708	13.2291	13.6068	13.8522	13.094	13.1847	13.0048	13.0892
CASP3	not-sig	not-sig	#N/A	#N/A	#N/A	#N/A	NA	12.8205	13.1674	12.4472	12.294	12.6735	13.1977	15.4181	13.1384	12.6836	12.7141	13.1853	12.6191	13.2431	12.9991	12.9169	12.9988	13.2527	13.7864	12.8641	12.9858	13.0407	12.57	12.6564	12.9831	12.9328	12.9204	14.115	13.1787	12.9368	13.3701	12.7681	13.3543	14.8309	12.9792	13.3531	12.7499	12.5645	14.1541	11.7506	12.393	11.1136	12.3533
G3BP1	not-sig	not-sig	#N/A	#N/A	#N/A	#N/A	NA	15.3844	16.6977	16.4773	16.1385	15.6573	16.1667	15.4667	16.357	16.163	16.3016	16.2063	16.5211	16.1223	16.3319	16.6438	16.3168	16.3949	17.3672	16.7192	16.7302	16.7349	15.6738	15.8466	16.2444	16.8971	16.0324	15.8668	16.3947	16.4702	16.2777	16.3758	17.0303	15.3782	16.198	15.7314	15.9327	16.2732	16.0771	16.4087	16.5974	15.2727	15.2002
RPS27A	not-sig	not-sig	#N/A	#N/A	#N/A	#N/A	NA	19.3066	19.2225	19.0787	19.4748	19.526	19.4053	19.8511	18.8673	19.297	18.3679	19.1379	19.0987	17.7855	19.0406	19.4622	19.1153	19.3081	17.8966	19.2494	19.1631	19.6154	19.0607	19.3833	19.2763	18.1194	19.5553	19.8138	19.2151	19.3134	19.4159	19.3003	18.9421	18.3582	19.1446	19.4309	19.7694	17.9593	19.1972	19.4643	19.1913	18.9789	19.2504
TANC1	not-sig	not-sig	#N/A	#N/A	#N/A	#N/A	NA	13.8352	14.3558	13.3024	11.9119	14.2015	14.0385	12.331	13.4665	12.3997	11.9442	14.0123	13.6066	13.9171	13.4954	14.3025	14.0324	14.1611	10.8121	13.4506	13.0949	13.6901	14.9958	13.4062	13.3956	13.437	12.7831	10.7393	13.3274	13.5503	13.6905	13.089	13.3578	12.1224	13.7356	11.3916	13.9569	13.2567	13.8438	13.4038	14.3627	13.942	14.7221
UFL1	not-sig	not-sig	#N/A	#N/A	#N/A	#N/A	NA	15.5577	15.348	15.1732	14.8965	15.6146	14.9609	14.7188	14.8282	14.3127	15.7655	15.5099	14.6465	15.4794	15.2238	14.6635	15.2735	14.6505	15.3849	15.0433	15.5608	15.373	14.8716	14.559	14.9145	14.7045	15.2776	14.8013	15.1138	15.2491	14.0027	14.7113	14.9111	15.6039	15.1159	15.5569	15.1727	14.5429	14.5184	14.4786	15.3418	13.8719	14.6233
PNN	not-sig	not-sig	#N/A	#N/A	#N/A	#N/A	NA	14.5849	15.0448	14.9298	14.6212	16.0361	15.1022	15.6843	14.2688	15.1722	15.4098	14.7941	15.0645	14.4257	14.5307	15.4076	14.7224	15.1906	15.4733	14.9764	14.8459	15.2604	14.5647	15.081	15.2655	13.0245	15.4936	15.289	15.2642	15.297	15.233	15.4926	14.7499	15.4656	15.1155	14.805	15.7119	14.613	14.9714	15.1454	15.3456	15.1885	14.9234
CAMKK2	not-sig	not-sig	#N/A	#N/A	#N/A	#N/A	NA	15.5493	14.2006	13.8833	15.2497	13.214	14.7375	14.7202	14.764	13.7986	14.2587	14.0209	13.8422	14.3709	14.3474	12.8017	15.6716	14.6963	11.859	14.2547	14.9128	14.0079	13.4654	14.7149	12.7383	14.1687	15.585	15.0483	13.6843	13.4516	14.2209	14.741	13.8943	12.5301	14.0643	13.8057	14.7922	14.2458	13.2304	14.2818	15.6973	13.8089	14.4211
LBP	not-sig	not-sig	#N/A	#N/A	#N/A	#N/A	NA	13.0681	12.3574	14.4513	13.0149	14.7605	12.1726	13.035	14.7351	13.2644	11.9748	12.9291	13.346	14.6219	12.3644	12.7673	12.7456	12.4941	13.3124	12.4566	12.7787	12.1483	14.7515	12.0516	12.9832	13.2774	13.9343	12.1518	12.042	12.4122	11.9425	13.4705	12.8954	11.7005	12.1106	12.339	12.4432	14.0492	13.9684	13.0673	12.5414	16.312	15.341
BASP1	not-sig	not-sig	#N/A	#N/A	#N/A	#N/A	NA	15.916	15.8345	16.1546	14.9964	15.3621	16.177	14.5101	16.4815	16.0499	14.2753	14.6055	16.1142	13.8668	16.3716	16.6411	14.693	15.0168	8.90642	16.4497	15.9482	16.4622	16.4802	16.7808	16.6427	15.549	14.9254	15.8835	16.3832	15.0519	16.3448	16.7753	16.6388	14.7752	16.4592	16.3491	16.3722	14.8153	16.3559	16.6662	16.2927	16.7129	16.7266
HLA-H	not-sig	not-sig	#N/A	#N/A	#N/A	#N/A	NA	17.2235	17.4787	16.5147	17.9279	15.0425	17.0802	17.1702	16.5438	17.5257	18.4493	16.8818	18.1556	17.0701	17.4579	17.4608	18.2371	16.5146	18.8716	18.3879	16.7803	16.6173	19.662	17.5364	16.7401	17.8502	15.5311	17.9717	18.5933	17.013	17.6526	17.8237	16.9339	17.7488	18.905	17.131	15.6228	18.6912	17.651	17.6904	18.9999	17.6373	17.5112
RIPK1	not-sig	not-sig	#N/A	#N/A	#N/A	#N/A	NA	13.7847	13.937	13.8468	13.573	14.4708	13.964	12.2957	13.7446	13.9263	14.5001	13.9625	14.5293	14.1675	13.7622	14.3602	14.0449	14.1221	13.9457	13.7597	14.0525	13.6145	14.5399	14.4561	14.4499	14.1062	13.723	13.8501	14.4797	14.181	14.2236	13.7349	13.5252	14.1803	14.2765	13.9571	14.0553	13.9371	13.2507	13.6208	13.7285	14.4155	14.4471
PRRC1	2	METAB	#N/A	#N/A	#N/A	#N/A	NA	13.8922	14.5021	13.7019	13.8466	14.754	14.3364	17.3663	14.0969	14.1949	14.3249	14.0416	14.5563	14.4245	14.0993	14.5419	14.0838	13.7248	14.2546	14.1729	14.7472	14.0028	14.3916	14.2236	14.6279	14.6863	13.6316	13.9754	14.0244	14.4974	14.1761	13.907	14.2381	14.2233	14.4773	14.4885	14.9425	14.4496	14.7974	13.8199	13.9272	14.5514	14.2886
UQCRFS1	not-sig	not-sig	#N/A	#N/A	#N/A	#N/A	NA	15.6409	16.263	16.528	16.4601	16.2454	16.7612	16.3206	16.1954	15.7042	15.5345	15.1195	15.7725	15.5067	16.3573	15.8413	16.5206	15.7194	15.2928	15.6168	16.593	15.8361	15.0554	16.2614	15.6688	15.9327	15.5223	15.0556	15.4156	15.7542	15.8174	15.5198	15.9606	16.81	15.2524	16.2483	14.9014	15.3917	14.6638	15.2244	16.432	14.7833	14.9126
PSMC4	not-sig	not-sig	#N/A	#N/A	#N/A	#N/A	NA	15.0587	15.0603	15.2301	15.1291	15.0385	14.858	18.2099	15.1475	15.2434	14.9813	15.2837	15.204	15.3159	15.1256	15.5202	14.8488	15.5112	16.1867	15.099	15.2088	15.1835	15.1327	15.4082	15.4435	15.0425	15.3066	14.9959	14.7636	15.0456	15.2035	14.9632	15.1497	16.98	15.4399	15.5375	15.1916	14.7565	14.9445	15.1403	14.5947	15.3641	15.3497
RAB10	not-sig	not-sig	#N/A	#N/A	#N/A	#N/A	NA	16.8536	16.4777	16.7048	15.9841	16.5009	16.2322	16.2574	16.2982	16.1505	16.6782	16.5803	16.8072	17.1592	16.1223	15.9989	16.4678	16.0328	17.818	16.3993	16.2311	15.8964	16.5563	16.5379	16.6113	16.4556	16.821	16.0424	16.4875	16.2943	15.9239	15.9834	16.288	15.0516	16.0511	15.9188	16.4242	16.656	16.5631	16.0338	16.4805	17.2899	16.3061
PAICS	not-sig	not-sig	#N/A	#N/A	#N/A	#N/A	NA	15.8669	15.7617	15.5362	15.417	15.4663	15.8065	15.789	15.6653	16.2094	15.5649	15.8139	15.9129	15.1898	15.2698	15.9423	15.7746	15.5585	16.7055	15.4651	16.0906	16.0548	16.2609	15.0294	16.5493	16.925	15.8005	16.592	15.8396	16.2599	15.6195	16.1204	15.5872	16.7264	15.3838	14.9302	16.118	16.6078	16.3225	15.3363	15.0415	15.5518	15.3548
SI	not-sig	not-sig	#N/A	#N/A	#N/A	#N/A	NA	14.1139	14.1418	14.3712	14.0522	16.4961	15.3923	12.9734	14.9848	13.763	14.9093	13.3568	13.5513	15.1277	14.1762	15.4727	16.0793	14.2852	14.87	14.3945	14.3832	14.6643	15.0087	13.8768	15.6739	12.969	15.2784	14.3067	14.7424	15.5476	13.5277	14.7997	16.2605	12.5865	14.0747	12.7305	13.2644	15.1433	15.8073	14.4538	13.8826	16.3493	15.223
TGOLN2	not-sig	not-sig	#N/A	#N/A	#N/A	#N/A	NA	11.3748	12.3127	12.7732	12.2054	12.0562	13.2644	14.0293	11.4199	12.8431	13.1945	12.6267	12.4413	11.2351	12.1856	12.7097	13.4297	14.1155	11.7484	12.8103	12.4302	13.818	12.0431	14.2888	12.9098	12.254	15.2709	13.7335	13.5125	12.8541	13.3059	14.1961	13.8067	14.4642	12.3862	12.4356	12.78	12.4577	12.1028	13.3079	14.0778	11.6807	13.0193
RO60	not-sig	not-sig	#N/A	#N/A	#N/A	#N/A	NA	14.3072	13.9213	13.783	13.8301	14.1318	13.6928	17.2004	13.7401	13.8721	14.1804	14.0033	13.8864	14.2446	13.7982	13.6296	13.804	13.5907	14.9527	13.9492	14.3628	13.6195	14.5724	13.8615	14.0427	13.7436	14.3935	13.4853	13.9541	13.7495	13.815	13.7865	13.7882	14.8609	13.9777	14.6472	13.7223	13.9173	14.2564	13.7881	14.2626	13.9529	13.8203
PPP1R12A	not-sig	not-sig	#N/A	#N/A	#N/A	#N/A	NA	14.6885	14.2146	13.985	13.7903	14.0802	13.8393	13.0043	14.0072	14.2453	14.1564	14.3512	14.7791	14.3006	13.9701	14.1754	13.7379	13.105	14.3036	14.5784	14.0261	14.1485	14.6475	14.3888	14.4625	13.9549	14.312	13.5241	14.1262	14.329	14.2851	14.1261	14.7916	12.2716	14.2707	15.2359	14.5809	14.3983	14.2493	14.6501	14.0217	14.6079	14.5366
CTR9	not-sig	not-sig	#N/A	#N/A	#N/A	#N/A	NA	13.0385	13.6348	13.1281	13.3875	14.2866	13.6431	13.7848	13.5666	13.0946	13.6281	13.6994	13.7323	14.2535	13.2429	13.6778	13.671	13.9009	12.7539	13.5911	13.1246	13.4574	13.5275	12.6644	14.3076	14.2657	13.6365	11.5907	13.4402	13.57	14.6057	13.1146	13.2579	13.3099	13.6896	14.1617	13.8724	13.5584	13.8523	13.3621	12.8499	14.2826	14.1598
LAMTOR1	not-sig	not-sig	#N/A	#N/A	#N/A	#N/A	NA	15.3194	15.194	15.0975	15.8529	15.4181	15.4708	15.0906	15.7663	15.4948	15.4748	15.6518	15.7722	15.2258	15.4855	15.666	14.9829	14.9973	15.2771	15.0846	14.3367	15.3457	15.867	15.4066	16.1653	14.8599	14.6271	15.0063	15.8635	15.0364	15.1397	15.6165	15.971	15.3226	15.1172	15.9158	14.9754	15.427	15.4268	15.6251	15.0591	14.9723	15.0921
ATP5F1B	not-sig	not-sig	#N/A	#N/A	#N/A	#N/A	NA	19.4071	19.7502	19.1658	19.7561	19.922	19.9937	19.5936	19.6337	19.331	19.24	19.9642	19.5855	18.7149	19.6384	19.5981	19.4842	19.306	17.4697	18.8761	19.5522	19.2723	18.7492	19.8056	19.4719	19.2909	19.0234	18.7234	19.3269	19.6349	20.3352	19.7769	18.8206	18.5908	19.1448	20.4135	19.1058	19.4667	19.0882	19.3578	19.3026	19.1538	19.4197
CHD4	3	CANONICAL	#N/A	#N/A	#N/A	#N/A	NA	15.3593	15.0589	15.5506	15.4316	15.1284	15.6539	15.4155	14.3947	15.8687	15.5642	15.2475	15.4411	14.2849	15.4969	15.8242	15.3911	15.851	13.7825	15.7184	15.2291	15.4256	14.5254	15.022	15.5706	15.3985	16.1562	15.0566	15.5302	15.3823	15.1023	15.8579	14.7555	14.2863	15.1456	15.7108	15.5003	15.4687	14.3922	15.3056	14.9207	15.0158	14.1803
ACO1	not-sig	not-sig	#N/A	#N/A	#N/A	#N/A	NA	16.2752	15.9234	15.7094	16.1314	16.6471	15.7737	15.3642	16.725	15.1097	15.8086	15.3502	15.7522	15.4883	15.3968	15.4838	15.4402	15.7355	16.0304	15.5939	15.7011	14.6388	15.2527	15.7767	15.6225	14.9697	15.7172	15.4005	15.4724	15.2508	15.545	15.4866	14.3763	15.5082	15.5839	16.8547	15.0875	14.6448	15.6465	15.1101	14.9941	15.5889	15.2197
ARL2	not-sig	not-sig	#N/A	#N/A	#N/A	#N/A	NA	13.9595	13.5662	13.3208	13.1175	12.6278	13.2657	15.2953	12.8779	14.1131	13.6589	12.9316	13.1836	13.2562	13.3891	13.251	13.2802	14.307	12.4453	12.6705	13.5146	13.4178	13.3531	13.2086	12.3593	13.8026	13.4572	13.9628	13.2616	13.2479	13.256	13.6846	12.9996	12.6828	12.6486	13.3015	13.2316	13.3252	13.1222	13.0277	12.9246	10.8324	11.5101
GCA	4	IMMUNE	#N/A	#N/A	#N/A	#N/A	NA	15.3585	14.64	14.8783	14.9556	17.1993	15.7735	15.9113	17.6463	15.463	13.8672	15.1434	15.2503	14.5054	15.3467	15.1951	14.7079	15.2996	15.5328	15.2483	14.7109	14.827	16.769	14.8388	15.7522	15.0036	15.5747	15.4036	14.4548	14.5089	14.755	15.4291	14.7171	13.7625	15.3411	15.5005	15.4219	15.7135	17.0598	15.7342	14.3795	16.3747	15.768
DYNC1I2	not-sig	not-sig	#N/A	#N/A	#N/A	#N/A	NA	13.9019	13.9605	14.184	14.091	13.3977	14.2697	16.2117	13.4199	14.3431	13.8937	14.1724	14.6618	13.926	14.2179	14.1916	14.0568	14.3928	14.3952	14.2504	14.6407	14.2201	14.8527	14.6508	14.6155	14.7038	14.5946	14.2234	14.1005	14.259	14.4864	14.4959	14.7348	14.0072	14.6791	14.705	14.4095	14.3686	14.0934	14.4448	13.9539	14.3587	14.3342
ASPN	1	EMT	0.775725	0.00601261	1.75053	0.00592391	NA	13.8462	9.42264	13.2475	14.046	14.0881	12.5541	14.1353	14.3545	12.9268	13.1518	13.0454	13.0013	13.4698	13.0036	12.8421	13.7227	14.0924	16.1682	12.7432	13.8372	11.7826	14.4902	13.4252	10.7903	12.985	12.1218	13.5593	13.7012	12.5064	13.9491	13.2478	14.9186	13.3741	12.1015	13.5051	12.758	12.9359	11.5318	13.6989	12.0536	13.0523	14.5712
TMBIM6	not-sig	not-sig	#N/A	#N/A	#N/A	#N/A	NA	13.5746	14.2547	13.6189	10.0496	11.104	12.2595	13.1734	11.7659	10.3603	12.7281	11.5352	13.9363	12.1466	11.1845	11.713	13.3287	13.4608	10.4158	12.4202	10.8435	12.9624	12.2387	13.7174	13.2364	11.9032	13.399	14.317	12.2414	12.8184	13.6857	12.1481	13.3554	13.2589	13.1497	13.6628	13.7681	12.1474	13.8036	13.9464	13.8483	12.9674	10.9502
INTS5	not-sig	not-sig	#N/A	#N/A	#N/A	#N/A	NA	13.4882	13.6301	13.6128	15.1761	13.1106	13.9176	15.1199	14.212	14.0571	13.7071	13.7084	13.3699	12.8264	14.5971	14.0067	12.8377	13.3219	14.4593	13.6108	13.5753	13.2201	13.374	12.9853	13.208	14.2693	13.7676	14.4432	13.5998	13.0085	13.5366	15.5608	14.1219	13.7258	13.3719	13.7067	16.0279	13.4929	13.2533	13.9044	13.7703	14.1072	15.3498
KIF11	not-sig	not-sig	#N/A	#N/A	#N/A	#N/A	NA	13.1314	11.4013	13.708	12.1661	13.4493	13.106	13.5848	12.6796	13.5277	13.0541	12.9081	13.1456	12.8953	13.4241	14.0633	13.0298	13.6176	11.9419	14.0222	12.692	12.8048	14.5193	13.0991	14.2426	13.8858	13.8232	14.0643	13.0375	13.0502	10.0868	12.4431	11.5414	12.3071	13.2574	12.832	14.593	11.8893	13.8566	13.2269	9.46957	11.5814	12.4603
SRXN1	not-sig	not-sig	#N/A	#N/A	#N/A	#N/A	NA	15.9679	14.5604	14.5636	14.975	14.4556	15.2629	15.7445	12.4883	14.9429	13.865	14.5663	12.3731	14.051	14.5295	14.8675	14.7215	13.7875	13.9069	14.7771	14.5129	15.1067	15.3359	14.8985	15.0299	14.1876	15.0482	15.1187	15.1346	15.0113	15.4991	15.4814	15.3711	15.6087	15.3029	15.5497	14.5189	14.6494	14.8481	14.9427	15.1129	15.2761	14.67
DCXR	not-sig	not-sig	#N/A	#N/A	#N/A	#N/A	NA	14.8971	14.8542	14.3053	16.2851	14.946	15.5298	16.057	15.8928	14.7452	14.276	15.2694	13.7174	14.0018	15.1368	14.4905	14.7905	14.411	13.8331	12.9629	15.0257	13.9256	13.8602	13.9094	14.7673	13.4585	15.3145	14.4686	14.3192	14.343	15.4473	14.7117	13.8215	14.4003	12.9918	14.9423	14.8161	14.4244	14.3065	14.1921	14.7947	13.9685	14.8925
HSPA2	not-sig	not-sig	#N/A	#N/A	#N/A	#N/A	NA	17.8865	18.3832	17.2218	17.128	16.5324	17.5387	16.2924	17.4873	17.217	18.4578	18.1391	17.9678	18.5211	17.4729	17.9554	17.5001	17.9469	20.0666	16.7187	18.6017	17.6835	17.9972	18.3497	18.2759	18.3634	17.1507	17.4367	17.7233	17.6795	17.3771	17.2548	17.3276	16.5111	17.927	17.2204	18.2819	16.9176	18.0833	17.4442	18.1501	17.8335	17.9429
DENND2B	not-sig	not-sig	#N/A	#N/A	#N/A	#N/A	NA	13.7861	11.7643	14.1625	12.0457	12.7048	12.3279	13.8129	12.3399	12.5724	12.8314	12.0791	14.4149	12.151	13.2035	13.8228	12.6388	12.9254	11.7212	13.2463	11.9045	13.2832	11.9741	12.6497	15.1493	12.9345	11.7348	11.4587	13.7418	14.066	13.1089	11.7008	13.6307	12.4522	12.4497	12.3903	11.8054	12.2107	11.2056	14.5363	13.3106	12.7116	12.1431
PPIG	not-sig	not-sig	#N/A	#N/A	#N/A	#N/A	NA	14.7679	14.7037	14.6555	14.4517	15.2579	14.7353	12.4779	14.6223	14.4635	13.2555	15.0753	14.0877	14.275	14.574	14.5248	14.5108	14.8243	13.4916	14.5092	14.8583	15.0365	14.6212	14.4395	14.6532	15.0291	15.1576	15.044	14.8194	14.7007	14.9546	15.0543	14.1885	14.9521	14.6501	14.7343	15.2545	14.4153	14.6144	14.6706	14.9154	14.8996	13.8245
CNNM2	not-sig	not-sig	#N/A	#N/A	#N/A	#N/A	NA	11.9912	13.3401	13.3276	12.3414	13.7831	12.739	13.9755	12.7918	14.5361	14.0568	13.3241	13.9458	14.778	13.7472	14.1774	14.5236	13.433	13.9343	13.4054	13.9711	13.802	13.3555	14.2846	13.9226	12.2917	13.2186	13.8953	13.68	13.6179	14.1362	14.2475	13.981	15.0674	14.9635	12.111	12.5165	13.7878	14.8273	13.2846	13.7466	12.6938	14.0766
UBE2V1	not-sig	not-sig	#N/A	#N/A	#N/A	#N/A	NA	16.0825	15.5996	16.1383	16.0423	16.2422	16.611	15.4194	15.493	16.0411	14.8942	15.3937	15.6894	14.9289	15.489	15.8959	16.0945	16.4157	15.2251	16.0022	16.2627	16.2764	15.5219	16.1919	15.9906	15.7643	16.7823	16.6613	15.9863	16.2704	15.9404	16.7284	15.9912	16.7993	15.9763	16.0182	15.5158	15.396	15.2004	15.9847	15.9869	15.9644	15.8753
SLC39A14	not-sig	not-sig	#N/A	#N/A	#N/A	#N/A	NA	13.4166	12.8307	14.0522	13.0618	13.9388	11.5471	13.8314	13.8916	11.7206	11.859	13.5999	12.7888	14.2369	13.4107	13.5704	13.9616	12.6542	13.3712	12.9197	13.7621	13.8558	13.2498	13.9028	13.4267	13.3929	12.6839	12.5327	14.1267	13.8846	13.6014	14.1665	14.1342	14.5485	13.9354	13.1813	13.8747	13.6705	13.8417	13.6802	13.3471	13.2431	13.8015
TMX1	3	CANONICAL	#N/A	#N/A	#N/A	#N/A	NA	16.2383	16.4216	16.2297	16.3803	16.9054	16.9847	16.6238	16.7213	16.2406	15.5319	16.2304	16.1768	16.4778	16.6202	16.5783	16.0137	16.5122	14.9519	16.0271	15.9666	16.5235	16.6367	16.5482	16.9478	16.717	16.4289	15.9489	16.8441	16.8938	16.4335	16.3384	16.3462	16.0883	16.4833	16.5691	16.5626	16.1292	16.3529	16.5815	16.5321	16.51	16.5904
TMEM143	not-sig	not-sig	#N/A	#N/A	#N/A	#N/A	NA	12.3886	12.2543	13.2178	12.9671	14.4859	14.124	13.1322	13.4645	15.245	13.9753	13.2649	15.3793	13.2847	13.2553	13.9061	13.6363	14.7989	13.3778	13.9299	13.5873	13.5314	14.2475	14.0614	14.1521	13.5754	11.9549	14.7819	13.2645	13.5286	8.94676	15.3403	13.4947	11.8067	10.9248	13.2257	13.1274	14.9406	12.0584	13.8849	14.0884	15.5415	13.8441
WDR6	not-sig	not-sig	#N/A	#N/A	#N/A	#N/A	NA	11.9587	13.6245	14.2911	11.3033	13.0975	12.3358	12.0245	13.293	12.8003	12.2116	13.6715	12.6841	14.3361	12.7084	13.6312	14.0239	14.4956	13.9729	13.1793	13.5925	13.1023	13.2818	14.585	12.1379	13.1367	12.764	14.5579	13.359	13.1471	12.653	13.9229	12.2644	12.8684	13.6304	12.7837	14.4379	12.4704	12.9951	11.5626	15.2267	11.5773	12.8238
VPS11	not-sig	not-sig	#N/A	#N/A	#N/A	#N/A	NA	13.5843	14.6308	13.9231	13.636	15.595	15.8733	14.364	13.7502	14.1904	14.0598	13.6685	14.2447	13.2654	13.1945	14.3851	14.3077	13.869	13.8911	13.1713	13.5509	14.3809	13.5224	13.4001	13.2845	14.1808	12.8083	15.2047	13.5889	13.8349	14.4743	14.0803	13.5353	14.825	13.4721	13.2759	13.2962	14.4726	14.0883	13.4697	13.5442	14.2167	14.1347
CPA3	1	EMT	1.12629	0.00590183	1.48255	0.00674685	NA	14.1577	10.979	13.9946	14.3374	14.3541	12.7687	14.3215	16.4201	11.2132	12.3519	13.1378	12.4634	14.5047	14.5488	13.3541	14.1785	12.5746	11.7562	13.4448	16.3713	12.1784	15.2478	16.3696	14.2727	13.0387	11.849	14.2821	14.0932	12.9573	13.3729	11.2152	16.214	14.5927	14.7219	15.1163	15.6666	13.6699	13.2392	16.8602	14.1941	15.8641	15.8029
DYNC1LI2	2	METAB	#N/A	#N/A	#N/A	#N/A	NA	14.7261	14.607	14.499	14.1486	14.7169	14.5073	13.2525	14.1682	14.5152	14.0209	14.5682	14.0054	15.3622	13.6465	14.295	14.0491	13.6403	13.8455	13.4333	14.5361	13.9036	14.1173	13.283	13.8291	15.4463	14.362	14.247	14.0855	14.1146	13.2338	13.0632	14.4171	15.6772	14.5048	14.4386	14.188	14.3948	13.5341	13.2499	13.626	15.0132	14.8712
PCBP2	not-sig	not-sig	#N/A	#N/A	#N/A	#N/A	NA	17.1326	17.114	17.7333	16.7151	17.0189	17.124	16.2839	17.5445	17.6878	16.5279	17.0715	17.7855	17.2769	17.3576	17.6628	17.2629	17.6697	16.1628	17.4678	17.3189	17.7604	17.4706	17.7143	17.5641	17.2548	17.8746	17.2659	17.6103	17.7402	16.5627	17.8344	17.0526	17.3756	17.4163	18.1609	17.9287	16.8351	17.8446	17.7482	17.6924	17.5417	17.1496
RPS26	not-sig	not-sig	#N/A	#N/A	#N/A	#N/A	NA	14.269	15.0277	13.8499	12.9826	13.6947	13.2978	16.5452	13.4423	13.8971	13.4697	14.4707	13.3164	13.2078	13.5166	13.8255	13.6865	13.4186	14.5957	13.6098	13.6743	14.1059	13.5783	13.8454	13.8456	13.639	13.5428	13.5566	14.2221	13.8835	14.2243	13.8064	13.6661	13.4711	14.3948	13.746	14.2303	12.7379	13.6426	14.322	13.9791	13.882	14.0423
DNM1L	not-sig	not-sig	#N/A	#N/A	#N/A	#N/A	NA	14.9394	14.6054	14.8211	15.0877	14.1624	14.4573	14.8713	13.6017	14.9799	14.6352	14.7823	15.3074	14.6895	15.0058	14.9404	14.9087	14.5788	14.1928	15.1614	14.8246	14.7088	14.661	15.2545	14.8495	14.7021	15.1472	15.3192	14.8882	14.6854	14.4169	14.9633	14.1956	14.3033	14.8205	15.5236	14.6144	14.5166	14.5338	14.6723	15.176	13.7697	14.0282
ADH1B	not-sig	not-sig	#N/A	#N/A	#N/A	#N/A	NA	12.0264	13.3678	13.674	14.7295	13.3397	13.336	10.2308	15.644	13.0486	13.2246	12.9776	12.3304	15.9878	14.077	13.1405	15.04	12.0168	10.786	14.9364	15.5656	11.596	12.5518	13.1793	12.8863	13.422	8.97635	14.079	13.0572	12.1142	14.3805	14.115	11.7765	15.5805	13.0903	12.3142	10.2144	12.3545	9.68061	14.2384	12.3235	15.6581	15.7866
TPX2	not-sig	not-sig	#N/A	#N/A	#N/A	#N/A	NA	12.4568	10.6013	13.8075	12.71	10.9609	13.5802	11.8945	10.6125	13.2296	13.0412	12.5092	12.1675	14.245	13.2085	13.096	12.2296	13.9473	11.7017	13.0232	13.7216	12.8673	13.0977	11.9544	13.2098	13.6179	13.5855	15.1368	12.3959	12.3904	12.5333	13.0759	12.3592	14.2473	12.9923	11.8568	13.2627	12.8916	12.4297	11.8529	12.9416	11.5774	11.5245
PPP3CA	not-sig	not-sig	#N/A	#N/A	#N/A	#N/A	NA	14.06	14.5311	13.9022	13.5989	13.6584	14.2192	12.3657	14.3642	14.0168	14.2023	14.5777	14.1568	14.4714	14.2081	14.4252	14.1587	14.4237	15.1039	13.9294	14.1438	13.8387	14.6727	14.2388	14.1884	14.0404	13.4399	13.974	13.7356	13.9038	14.2191	13.7824	14.12	15.21	14.0181	14.1378	14.6319	14.0697	14.6444	14.2086	14.3045	14.3854	14.3266
C2	not-sig	not-sig	#N/A	#N/A	#N/A	#N/A	NA	14.4671	13.692	14.366	14.0272	14.251	13.7621	13.6444	15.2859	13.7195	14.3138	13.4373	14.2297	13.9783	13.9312	13.6011	13.9214	14.6967	13.0751	14.189	13.0192	13.548	14.5808	13.3502	14.262	13.4718	13.6737	14.3455	14.0267	13.9455	13.833	14.0078	14.4781	14.54	14.1697	14.8407	14.3969	15.2028	13.9267	14.4956	13.9797	15.3938	15.4858
HNRNPF	2	METAB	#N/A	#N/A	#N/A	#N/A	NA	15.0956	15.7089	15.1002	15.358	15.7765	15.282	17.0121	15.2759	15.8146	15.9776	15.7093	15.4123	15.4743	15.4168	15.6048	15.4309	15.6532	15.0609	15.5808	15.473	15.4881	14.9036	15.5005	15.4373	15.7112	15.8622	16.163	14.8964	15.6037	15.4815	15.3317	15.1471	16.1442	15.4026	15.5712	15.9578	15.3445	15.6975	15.3397	15.35	15.0937	15.0029
FAM133B	not-sig	not-sig	#N/A	#N/A	#N/A	#N/A	NA	12.4264	12.7906	12.5373	11.4613	13.3942	13.0218	12.9996	12.1073	12.3655	7.70839	12.1533	12.7026	12.3217	12.3807	12.9051	11.839	12.8572	12.0765	12.6358	12.4666	13.3351	11.8827	12.3461	12.1566	12.496	12.7363	12.0527	12.0658	12.4429	12.862	12.6917	11.7642	13.0601	12.4716	12.6552	12.8863	13.2267	12.774	11.5005	12.3337	12.1334	12.5103
PRKG1	not-sig	not-sig	#N/A	#N/A	#N/A	#N/A	NA	13.5054	12.2276	12.6903	13.696	11.7898	12.1446	12.5762	12.2627	13.4436	12.142	13.0853	13.184	14.5118	13.4915	12.265	13.1339	13.2019	14.9437	12.7983	12.3096	12.3045	12.9368	12.6572	11.8737	12.3314	13.3843	12.358	12.7686	13.0128	13.8049	11.6786	13.175	14.1701	12.579	11.9644	13.2682	12.5106	12.0516	11.7417	12.9867	13.2929	11.5602
SERPINC1	4	IMMUNE	#N/A	#N/A	#N/A	#N/A	NA	16.7037	16.9054	16.2313	16.6098	18.3175	15.5617	16.2071	18.6298	15.8388	15.6366	16.2228	15.7981	15.5339	16.0993	16.6322	14.9788	16.1656	15.6081	15.6646	15.9879	15.5394	17.2714	15.6695	17.2087	15.5312	15.9291	15.3271	15.9106	15.9435	16.0408	15.3143	15.9051	15.4136	16.1375	16.1771	16.2766	16.0727	15.814	16.5305	15.8843	16.5372	16.961
DYNC1LI1	not-sig	not-sig	#N/A	#N/A	#N/A	#N/A	NA	13.385	13.402	13.4894	13.695	13.3599	12.7879	15.7863	13.7593	13.2632	13.4561	13.5892	13.487	13.1197	13.231	13.0655	12.3563	13.9719	14.0963	13.9558	12.5651	13.736	13.9173	13.5426	12.8187	13.4655	12.2257	13.1442	13.1819	13.0875	13.9949	13.5765	12.869	12.4221	12.4628	12.8838	12.5683	13.482	12.5003	14.0406	12.9966	13.5756	13.7824
ZNF706	not-sig	not-sig	#N/A	#N/A	#N/A	#N/A	NA	13.5879	14.1451	13.8101	14.5391	13.1322	14.716	14.7396	13.6305	14.344	13.7093	14.1279	13.061	14.0023	14.8278	14.738	13.7149	13.8054	12.406	13.9211	14.093	14.7193	13.3944	14.3181	13.5439	14.2422	14.2525	15.231	14.162	14.1825	13.3371	14.0564	13.2425	16.8768	14.8317	14.6245	14.9315	14.7837	13.985	13.6648	15.1864	11.8641	11.4218
SF3A3	not-sig	not-sig	#N/A	#N/A	#N/A	#N/A	NA	16.0364	15.3729	15.72	15.6024	15.4326	15.5859	15.7666	15.1116	15.8152	15.4188	15.5055	15.7418	15.2319	15.4476	15.7713	15.2055	15.3997	14.6384	15.5935	15.463	15.5327	15.4483	15.484	15.6007	15.3403	15.7882	15.104	15.4096	15.4525	15.3568	15.5356	15.1852	15.8489	15.5477	15.5417	15.6836	15.049	15.1891	15.2278	15.4759	15.3028	15.1894
VAMP3	not-sig	not-sig	#N/A	#N/A	#N/A	#N/A	NA	13.6733	13.9055	14.3058	12.1233	13.0679	13.518	13.9419	12.4076	14.1165	13.9821	14.3156	13.3565	15.6691	14.2378	13.7693	14.707	14.4662	14.3186	14.2678	14.1469	13.6869	14.5199	14.2997	14.3515	14.0682	13.6588	13.5924	14.056	14.6048	13.6737	14.1073	14.7242	13.5647	14.0448	13.7975	14.0798	14.641	14.0156	14.4604	14.2104	13.0176	12.8956
ACACA	3	CANONICAL	#N/A	#N/A	#N/A	#N/A	NA	15.1275	14.9936	15.5216	15.9568	15.2305	15.1915	13.0679	15.5145	15.9063	14.7081	14.9265	15.6862	15.3564	15.2978	15.2125	15.2659	15.6767	15.3002	14.7569	14.9378	15.8953	15.1348	15.21	15.1104	15.9437	15.1392	16.1543	14.7343	15.1856	15.3569	15.7181	14.8311	15.3482	15.2189	15.1896	14.342	15.0186	15.1874	15.0757	14.8911	14.8818	14.7807
LONP1	not-sig	not-sig	#N/A	#N/A	#N/A	#N/A	NA	14.6443	15.4467	14.8093	15.5164	16.6303	16.3158	16.4049	15.8624	15.6965	15.5811	15.9195	15.4675	15.5587	15.3912	15.8448	15.1076	15.2313	16.0057	14.9344	15.2329	14.7539	15.1868	15.3974	15.4649	15.0375	15.5728	15.5526	14.7644	14.4948	15.563	15.6674	15.167	15.7388	14.9224	15.43	14.9116	15.9187	15.0992	15.5199	15.6203	14.921	15.6459
SERPINA3	not-sig	not-sig	#N/A	#N/A	#N/A	#N/A	NA	15.5389	16.6041	17.3152	15.1458	16.1971	15.1398	17.6781	17.9511	16.3747	15.6835	15.392	15.8248	17.44	14.0995	15.5415	14.6036	15.1821	17.3485	15.7026	15.1741	15.0141	16.9491	14.8222	16.4248	15.8238	16.6246	15.5266	16.5122	15.0284	15.5251	16.0937	16.3358	15.1983	15.2513	15.8434	15.0625	15.8526	15.4407	15.6731	15.4762	16.7697	17.1994
GNG12	not-sig	not-sig	#N/A	#N/A	#N/A	#N/A	NA	13.6345	14.0279	13.9704	13.5742	13.35	13.4255	13.3448	13.7386	13.4757	14.1843	14.6924	13.4339	14.976	13.7251	13.6383	14.5121	13.6786	15.9768	13.6977	14.4063	13.7848	13.2375	14.573	13.8045	13.8326	14.3107	14.4677	13.0334	13.4879	13.1548	13.4211	14.1137	15.2659	13.5872	12.2758	13.0772	13.643	13.2094	13.2364	14.3332	11.7722	13.5197
ARID1B	not-sig	not-sig	#N/A	#N/A	#N/A	#N/A	NA	12.8159	12.3139	10.6369	11.2615	12.6529	12.5217	12.1951	10.991	10.5876	12.3493	11.7737	12.5499	11.6842	12.4554	11.9506	10.7763	11.957	11.794	11.672	12.7604	12.1561	12.3983	13.1582	12.0408	11.7977	12.326	11.6854	11.455	11.6643	12.3754	11.7573	11.5815	11.4651	11.4443	12.1825	13.1925	11.1789	10.8649	9.70806	10.4613	11.7577	13.367
BRD1	not-sig	not-sig	#N/A	#N/A	#N/A	#N/A	NA	12.7278	11.9307	13.2804	13.3266	12.4118	12.2496	11.0589	12.4991	11.0905	11.5502	13.0946	10.9065	12.048	12.7972	12.912	11.9343	11.2977	11.476	12.0139	13.1708	12.3593	10.9771	11.1506	11.9435	13.2581	14.4896	12.0098	12.6294	12.0356	11.1637	11.3193	11.4069	12.1002	12.0057	12.654	12.6745	11.2938	10.803	11.4818	12.4434	11.3422	11.216
AIP	not-sig	not-sig	#N/A	#N/A	#N/A	#N/A	YES	14.7232	14.5933	14.5812	14.8154	14.9599	15.0152	11.9026	15.0026	15.0358	15.3763	14.5268	14.8054	14.487	14.5861	14.9159	14.738	14.8474	15.7773	15.4118	15.3734	14.8491	15.0034	14.7198	14.9275	14.7181	14.9335	15.0139	14.7781	15.402	14.498	14.599	15.9056	15.569	14.4799	14.3895	14.7358	14.0305	14.9078	14.5684	14.5505	13.5768	14.1238
PLIN2	not-sig	not-sig	#N/A	#N/A	#N/A	#N/A	NA	13.8317	14.4749	15.2832	15.0318	14.0195	14.1569	13.5867	14.4983	14.269	14.3489	14.2205	14.4255	14.8091	13.6964	14.2713	13.7055	14.4689	14.7262	14.2698	13.8772	13.9118	15.0111	14.5675	13.4552	14.5051	13.7788	12.8785	14.2526	13.6996	13.4413	13.6918	13.6779	12.712	14.3896	14.0661	13.223	14.22	15.4077	14.4049	14.1501	13.3466	13.9698
ITIH4	4	IMMUNE	#N/A	#N/A	#N/A	#N/A	NA	15.0316	14.9989	15.1667	14.9226	15.5791	14.5077	17.5083	15.7486	15.3305	14.8653	14.5952	15.0391	15.1563	14.43	14.4055	13.9126	14.5383	15.3677	14.7085	14.5717	14.3928	15.2802	14.1725	14.8262	14.4657	14.8086	14.2628	14.4364	14.3699	14.4986	14.4907	14.9384	13.1092	14.9971	14.5627	14.8041	15.5791	15.7109	15.323	14.21	15.8593	15.5838
ARPC3	not-sig	not-sig	#N/A	#N/A	#N/A	#N/A	NA	16.53	15.9884	15.2122	15.8895	16.5232	15.5805	16.6047	16.3453	16.4328	15.8007	15.0698	15.6543	15.0409	15.3935	16.6704	16.0287	16.7672	16.9166	16.8438	15.8906	16.9722	16.6769	17.0686	16.3	15.3174	16.604	16.4757	17.1893	16.5602	16.5919	16.5384	16.8423	15.8043	17.0926	15.6619	16.125	15.6829	17.4954	15.8062	17.1516	16.1929	16.7805
KRT19	not-sig	not-sig	#N/A	#N/A	#N/A	#N/A	NA	20.4233	20.7322	19.9858	20.1648	18.2961	20.3745	19.8234	19.8869	20.1918	19.1912	19.914	20.0866	19.0876	20.2567	20.3864	20.4061	20.025	18.1154	18.677	20.3546	20.2987	20.4853	20.7163	19.4602	19.1894	20.4125	19.4337	18.3486	20.181	19.9891	20.4966	20.2897	19.9444	19.9696	20.7983	20.0036	19.407	20.1043	20.2944	20.8774	19.7591	19.811
RBM39	not-sig	not-sig	#N/A	#N/A	#N/A	#N/A	NA	15.7613	16.2023	16.3237	16.5534	15.8381	16.6526	16.2192	15.5814	16.5111	17.1663	16.5819	15.8345	16.8049	16.2488	16.4598	16.287	17.0281	16.5635	16.8928	16.836	16.7862	15.7745	16.0853	15.9802	16.8967	17.2454	17.1488	16.0126	16.2351	15.7178	16.4453	15.4184	16.9801	16.3396	16.4191	16.8172	16.6277	16.1886	15.9894	16.6934	15.5342	15.6122
SSRP1	not-sig	not-sig	#N/A	#N/A	#N/A	#N/A	NA	16.3067	17.2502	17.4834	16.9944	17.5765	17.3698	16.9025	16.9079	17.1851	16.8059	17.2992	16.8534	17.2745	17.7317	17.8602	15.9774	17.3425	17.5067	16.6384	16.7546	17.0556	16.8716	16.5205	17.3054	17.5799	17.1636	16.8122	16.95	17.3552	16.7365	17.1058	16.4191	15.2157	15.9255	17.2485	17.2269	16.6231	17.1637	16.5394	16.7755	16.5017	16.3921
CNBP	not-sig	not-sig	#N/A	#N/A	#N/A	#N/A	NA	12.1327	11.4608	13.7041	12.7992	10.8687	13.7984	9.70457	12.1436	13.3929	9.17198	11.6534	9.51637	11.0732	13.1038	12.7673	14.3096	13.0261	9.82228	13.0278	11.9931	14.9994	11.8315	12.6333	12.7098	13.2214	12.7888	14.0165	13.9415	13.7814	13.8957	13.0042	12.0556	16.9861	14.3944	13.2327	14.6506	12.4561	13.3377	14.3461	13.3792	13.6485	13.2889
APOOL	2	METAB	#N/A	#N/A	#N/A	#N/A	NA	13.9026	13.6413	13.0279	13.3186	13.2942	12.5154	11.4584	13.6386	12.4528	13.6985	13.4086	11.9575	12.94	12.0262	11.9713	14.019	12.4121	14.1731	12.1375	12.9568	13.2543	12.7315	12.9338	13.2028	12.702	13.0473	12.2651	12.4167	11.5008	13.3274	13.8153	13.2634	14.5151	10.734	13.8594	12.4192	13.4541	12.1192	12.6486	14.6971	13.0015	12.0611
OXSR1	not-sig	not-sig	#N/A	#N/A	#N/A	#N/A	NA	14.4189	14.951	14.6652	14.6746	14.8473	14.6438	11.4645	15.1309	14.5918	14.9989	14.8134	14.7368	15.0234	14.6754	14.8336	14.7601	14.7061	14.9986	15.0434	14.5103	15.0995	14.9591	14.602	14.7251	14.6543	14.6297	14.4908	14.5084	14.977	14.814	14.5697	14.7383	15.2275	14.821	14.6441	14.9095	14.7796	14.7106	15.0043	14.258	14.8058	14.7404
CDHR2	1	EMT	0.758404	0.0130255	1.63228	0.00825012	NA	13.4209	13.8306	12.5893	15.6192	11.6288	12.5452	13.2528	15.1243	11.4454	12.6413	11.0562	12.765	14.1563	12.6712	12.2174	12.6096	11.4067	15.2194	13.7841	12.2994	12.4506	12.5658	13.5572	12.3496	11.8798	13.4587	13.0736	13.5858	11.8124	14.6718	12.4865	12.5822	13.0329	15.5106	12.0835	12.3877	12.3882	14.5188	12.2361	12.1287	12.7775	15.1094
TRIP11	not-sig	not-sig	#N/A	#N/A	#N/A	#N/A	NA	14.1046	13.6142	13.6825	13.397	13.9294	14.0545	13.2972	13.3357	12.9326	13.4859	13.6136	14.1105	14.2178	13.5672	13.5889	12.9658	13.5349	13.6157	12.8135	13.7108	13.144	13.6237	14.0274	13.6603	12.5873	13.0164	13.226	12.9838	13.5295	15.1442	13.3303	13.3631	13.6232	13.2864	13.8611	13.6955	12.5203	13.6517	12.9952	13.0315	12.8704	12.9189
GTPBP6	not-sig	not-sig	#N/A	#N/A	#N/A	#N/A	NA	12.2166	11.9154	9.75899	13.6484	11.2893	12.7728	12.9113	10.6946	12.1039	13.4936	13.0602	12.9931	10.78	12.4722	12.6645	12.6278	12.1372	10.4745	12.1306	12.6036	12.8254	9.91787	12.1933	12.7342	12.5574	12.3801	11.7023	11.7427	11.6022	12.8353	12.5383	10.4044	12.0115	11.1792	12.75	12.1774	12.4736	10.1509	12.9744	11.399	11.7907	12.0938
SYVN1	not-sig	not-sig	#N/A	#N/A	#N/A	#N/A	NA	12.2212	11.4343	12.2365	12.1459	11.4253	12.4639	13.3751	11.9915	12.5131	11.7901	11.9804	11.9062	8.81646	12.1636	11.8814	11.9401	12.4038	11.6026	12.1499	12.3677	12.0407	12.8802	12.3729	12.989	11.1525	11.5389	11.5688	12.4042	11.9205	12.9396	12.8572	13.3783	12.0842	12.868	12.2862	10.7781	11.8955	12.1276	12.6421	12.829	12.6141	13.2279
SRI	2	METAB	#N/A	#N/A	#N/A	#N/A	NA	16.4871	15.3301	15.6223	16.0008	14.727	16.3329	15.6017	14.4673	14.7833	14.3636	14.839	14.5775	15.1135	16.8671	15.1025	17.0027	14.4699	15.9142	15.2699	16.974	15.907	14.5348	16.2975	14.6558	14.9878	15.8871	15.9011	15.389	15.2478	15.3548	16.4764	16.0493	15.9492	16.4132	15.3845	14.9937	14.9024	14.6229	16.171	15.5579	15.6276	15.86
WNK1	not-sig	not-sig	#N/A	#N/A	#N/A	#N/A	NA	14.3951	13.8853	13.9351	14.3743	13.9431	13.98	13.7782	13.5979	14.461	12.7196	14.7613	14.7453	14.2885	14.2271	14.2196	14.3491	14.284	14.0282	14.1843	14.0221	13.8403	14.0618	14.2726	14.2301	14.2256	14.245	14.0694	13.6675	14.5225	14.2321	14.4666	14.4334	12.6824	14.3717	14.1688	14.0736	13.6726	13.3771	14.1477	14.3213	14.1858	13.7464
DIABLO	not-sig	not-sig	#N/A	#N/A	#N/A	#N/A	NA	15.8256	15.5457	15.8487	15.3497	15.4574	15.5479	11.2125	15.4091	15.2954	15.2141	15.5496	15.4001	15.5658	15.514	15.3022	15.5651	15.321	14.9941	15.5167	15.5928	15.4017	15.3568	15.5411	15.4224	15.422	15.6481	15.0266	15.3346	15.5023	15.285	15.644	15.5221	16.0856	15.422	16.1249	15.2242	15.5499	14.8624	15.4146	15.3856	15.1591	15.2147
CWC22	not-sig	not-sig	#N/A	#N/A	#N/A	#N/A	NA	13.2946	13.256	13.7411	13.3434	14.1356	13.9229	13.3523	12.7652	12.2356	13.0729	12.7746	13.1106	11.5612	12.9047	13.9485	14.1743	14.3586	12.1379	13.3498	13.686	14.3257	13.8749	13.7268	13.8767	12.9888	13.4486	12.732	13.8445	13.203	13.555	14.0403	12.5732	12.7932	12.8613	12.1144	12.5677	12.4151	13.2225	13.6984	13.3322	14.0337	14.0051
HTATSF1	not-sig	not-sig	#N/A	#N/A	#N/A	#N/A	NA	13.969	13.441	13.6682	13.7364	13.1547	13.9155	15.2834	13.7073	13.2127	13.8884	12.7107	13.2262	13.6518	12.8332	13.2672	13.6747	12.9196	13.5841	14.6999	14.0994	13.8961	15.0091	13.6428	13.1504	13.6752	13.738	13.2732	13.4651	13.7862	13.7838	13.6071	14.0712	15.6279	15.3038	14.1457	14.4167	13.3814	13.4572	13.5852	13.7649	13.3069	13.169
AGO2	1	EMT	0.396881	0.0168222	2.82684	0.00901896	NA	14.7589	14.5413	14.8929	14.7701	14.697	14.9917	12.0828	15.085	15.0984	14.843	14.7042	15.3431	14.2822	14.7938	14.934	14.8781	14.9598	15.9473	15.2243	14.768	15.196	15.6959	15.0788	15.0098	14.6454	15.5594	13.7338	15.0259	15.1021	15.1787	14.7733	15.6205	15.7763	15.3168	15.0763	15.2118	14.369	14.9696	15.0773	15.8974	15.8877	15.904
PSMD7	not-sig	not-sig	#N/A	#N/A	#N/A	#N/A	NA	14.8102	14.5389	14.7808	14.0367	13.7935	14.193	16.1811	14.5552	14.5674	14.6643	14.4719	14.5491	14.6765	14.4715	14.6696	14.5921	14.4439	15.4467	14.626	14.7927	14.7974	14.2649	14.6029	14.9369	15.099	14.8152	14.6464	15.0457	14.8792	14.6419	14.7236	14.3353	14.8078	14.9417	14.3381	14.9307	14.9418	14.7064	14.7141	14.1717	14.0072	14.5414
HBG1	not-sig	not-sig	#N/A	#N/A	#N/A	#N/A	NA	12.6851	11.659	13.7133	14.0952	18.3453	12.7351	17.918	13.281	13.1671	12.4634	12.7182	14.1786	13.3449	16.5277	14.6962	17.7078	12.8016	11.0489	15.3025	13.3463	15.0009	13.6203	12.4382	13.9929	15.3549	12.1205	12.3762	12.3553	12.7135	13.5683	16.2031	13.2143	14.8931	15.2296	16.5938	13.1378	13.9514	15.1902	14.4449	13.9557	15.9929	15.7454
HEBP2	2	METAB	#N/A	#N/A	#N/A	#N/A	NA	14.0703	14.7718	14.977	13.9525	13.6975	14.2438	15.5068	13.95	14.3979	15.1562	13.9689	14.2631	15.1784	14.2526	13.7611	14.9576	14.4856	15.9012	14.7928	15.6207	14.5	14.6242	14.3191	14.5947	14.1732	14.6581	14.2257	14.8722	14.5306	14.4168	14.3006	14.6592	14.6704	14.3766	15.5181	14.9284	14.2823	14.662	13.2144	14.1229	14.4459	14.2097
HBE1	not-sig	not-sig	#N/A	#N/A	#N/A	#N/A	NA	11.7221	14.1193	13.4784	14.747	12.4051	12.5309	18.3678	13.2066	14.3256	12.4104	13.3448	12.985	11.6843	14.2694	12.1004	14.0691	13.0571	13.5713	13.4399	12.9007	12.5744	13.2733	12.1561	13.8612	14.3589	12.1787	14.3353	13.5628	12.8458	13.5606	13.6459	14.1939	16.0367	14.4791	12.7825	13.8154	14.634	15.4524	14.7253	13.2172	15.9172	15.4002
MVD	not-sig	not-sig	#N/A	#N/A	#N/A	#N/A	NA	15.7102	13.7399	14.0168	13.0882	14.5704	13.7727	11.7784	14.3203	13.9029	14.6262	13.7193	13.4135	14.8937	14.747	15.6108	14.6533	13.8042	15.1107	14.2075	14.5873	13.9121	13.5947	13.8849	12.9372	14.8536	15.3509	15.4006	14.5749	14.5318	14.4277	14.38	15.1613	14.7535	14.7015	13.7432	14.7361	14.0686	14.9368	14.9137	14.1757	14.0605	14.912
SLC1A4	not-sig	not-sig	#N/A	#N/A	#N/A	#N/A	NA	12.6608	11.9776	12.3918	12.8527	12.0163	11.892	13.7936	11.8715	12.9993	14.0494	13.5492	13.2939	13.2699	12.5985	12.7349	12.5263	11.7959	14.4913	13.2664	12.7571	12.3495	13.0429	13.2138	13.7436	14.1535	13.1967	13.9448	14.3326	13.5312	12.7859	13.2361	13.3594	12.7379	14.4738	12.0173	12.856	13.5815	11.7348	12.9381	12.6226	12.2722	12.9483
ACO2	2	METAB	#N/A	#N/A	#N/A	#N/A	NA	15.7564	16.0217	15.6278	16.414	15.7254	15.933	15.4867	16.5818	15.4296	15.6616	16.3498	15.753	15.9039	15.6557	14.6966	15.7501	14.948	16.6204	15.4288	16.0222	15.0969	14.7888	15.9699	14.9231	15.8636	14.9427	15.6566	15.3222	15.5558	16.4497	16.0004	16.0883	16.5224	15.5017	15.8291	14.9073	15.9442	15.4317	15.2742	15.1898	15.3034	15.2091
ARSB	not-sig	not-sig	#N/A	#N/A	#N/A	#N/A	NA	13.3036	12.8014	11.3185	13.7146	11.3796	11.5877	10.8608	14.5893	12.0209	10.9664	12.0512	12.0338	11.8855	10.9472	11.4301	11.7767	11.4042	10.5595	12.1096	10.1432	13.5525	11.176	12.2468	9.88976	10.9824	11.0772	10.6082	11.183	10.7295	7.56378	8.37397	11.732	11.6267	12.1032	12.8833	10.2809	12.3766	10.2835	11.7602	9.58324	13.1695	11.9552
LMTK2	not-sig	not-sig	#N/A	#N/A	#N/A	#N/A	NA	15.3763	13.2921	14.8142	16.6374	12.6184	15.3739	13.2915	12.7982	15.4588	12.7501	13.1566	16.3782	12.9052	13.9233	15.3106	13.3154	14.3346	12.9666	13.6851	17.8546	15.4903	14.9408	14.9642	14.5173	11.9438	16.6608	15.3682	14.9991	14.9315	12.2043	15.0325	14.1763	12.9818	13.3622	14.4778	16.2897	13.6252	13.901	13.6184	13.8152	15.2128	12.1235
SNX2	not-sig	not-sig	#N/A	#N/A	#N/A	#N/A	NA	14.3382	14.6929	14.45	14.73	14.4762	14.7046	13.9968	14.5666	14.5326	14.2527	14.6842	14.3864	14.4708	14.3932	14.6046	14.582	14.2565	10.9283	14.7508	14.7134	14.738	14.6069	14.616	14.5254	14.5551	14.4751	14.5224	14.5491	14.4476	14.6441	14.354	14.4112	14.5983	14.4397	14.5838	14.3783	14.5594	14.4384	14.5276	14.3255	14.3218	14.3529
RTF1	not-sig	not-sig	#N/A	#N/A	#N/A	#N/A	NA	14.8871	14.7606	15.1995	14.8979	15.199	14.6044	12.9189	14.4457	14.4093	14.9463	14.8748	14.6281	14.739	14.5989	14.806	14.3967	14.5184	15.6395	14.9155	15.1404	14.9177	14.7358	14.2087	14.9436	15.257	15.2907	14.7326	15.0442	15.0839	14.0434	14.8367	14.9862	14.1446	15.1875	14.4215	15.2957	14.7547	14.895	14.6596	14.6653	14.6489	14.7343
RPRD2	not-sig	not-sig	#N/A	#N/A	#N/A	#N/A	NA	13.1624	12.9223	12.9556	12.8417	12.0424	13.1098	14.1561	13.0937	13.1061	13.6613	13.0996	13.2509	14.2643	12.6645	12.5223	12.8591	13.4595	14.1724	13.0395	13.0859	13.8235	13.8061	12.4001	12.8402	13.3464	12.4897	12.9338	12.3995	12.6974	12.3362	13.0486	12.6533	13.6017	13.3435	13.3386	13.579	13.1103	13.4964	13.1686	13.5481	15.0177	15.6043
PLVAP	not-sig	not-sig	#N/A	#N/A	#N/A	#N/A	NA	12.3423	14.3804	14.9982	13.9958	14.4948	15.1567	13.163	14.8077	11.9052	14.0468	12.278	12.1793	15.6471	14.7093	12.3347	14.3913	12.8018	11.2287	13.5464	14.4577	16.1786	12.1625	14.9551	12.1706	14.8185	12.9125	13.2678	13.342	13.8719	16.4909	15.4666	14.1086	12.606	12.4661	12.9163	12.3754	15.2654	12.5459	14.3922	15.6879	14.192	15.116
ATP8B1	not-sig	not-sig	#N/A	#N/A	#N/A	#N/A	NA	14.2672	14.4432	13.0489	13.8008	13.4909	14.5984	11.3382	13.5156	12.9795	14.0542	14.0258	14.3201	14.6616	13.8156	13.7027	14.4221	13.3021	10.6141	12.188	14.1668	12.9433	13.5485	14.6076	14.5861	13.1018	15.0164	14.5705	14.2283	14.4162	14.154	13.9682	14.0657	14.2951	13.4532	14.1078	13.9929	14.1327	14.0004	13.7399	13.7526	14.2583	14.0143
TCERG1	not-sig	not-sig	#N/A	#N/A	#N/A	#N/A	NA	14.7694	14.9385	14.5766	14.8111	15.0607	15.1749	12.193	14.5976	15.0745	15.2171	15.1363	15.0463	14.8014	15.0125	15.4409	15.0623	15.2262	14.4124	15.4372	14.999	15.3934	15.0736	14.8908	14.7905	15.0941	14.96	14.7881	15.0614	14.7844	14.9608	14.5726	14.666	15.2574	14.9104	15.352	14.5401	14.664	14.8348	14.89	15.1319	14.5183	14.9746
UBE2D3	not-sig	not-sig	#N/A	#N/A	#N/A	#N/A	NA	12.1257	12.2459	11.3682	12.5929	12.6231	12.7697	16.4222	12.8542	11.6936	10.9816	11.7141	11.7122	13.4742	12.1558	12.3396	12.1751	11.8349	13.6559	12.9817	11.6361	12.1309	12.2296	12.139	12.0588	12.735	11.6501	12.7281	11.1292	12.0508	12.0159	12.193	12.2151	12.0132	11.7141	12.7316	12.8557	11.8001	13.1244	12.1044	12.1832	12.9187	12.1928
VPS45	not-sig	not-sig	#N/A	#N/A	#N/A	#N/A	NA	14.9136	14.3032	14.4235	14.5394	14.7603	14.6232	12.2381	14.3131	14.8795	15.3116	14.8627	14.5605	15.2677	14.0771	14.3354	14.735	14.2848	15.0457	14.6564	14.8709	14.1512	14.8798	14.7243	14.5548	14.134	13.8646	14.1874	14.5347	14.2138	14.828	14.33	14.4368	12.7811	13.5939	14.2164	14.3776	14.4336	14.292	14.439	15.0684	14.0392	14.437
TLN2	not-sig	not-sig	#N/A	#N/A	#N/A	#N/A	NA	13.666	13.4459	12.9019	13.4713	13.4084	14.0393	13.332	13.7973	12.8053	13.8796	13.4893	12.6711	14.5488	13.3448	14.0284	13.0815	12.9249	13.7409	12.7135	13.2475	13.3368	13.2446	12.503	13.2618	13.9189	13.737	12.7512	13.6374	13.9438	12.6597	13.846	14.0992	13.2664	12.9332	13.451	12.9074	13.2088	12.868	12.5975	13.4494	13.8074	13.4498
HSDL1	not-sig	not-sig	#N/A	#N/A	#N/A	#N/A	NA	15.0111	13.1054	13.652	13.5203	12.5398	13.7482	13.568	13.0971	12.8959	13.1037	14.1796	12.9787	13.9276	14.017	12.9115	13.5614	12.5773	12.2821	13.6149	13.9421	13.5839	12.7679	13.1628	13.0894	13.4252	13.1072	13.181	13.3052	12.5406	14.2871	13.6912	13.7609	12.744	13.4648	14.6387	12.9673	13.3557	13.3332	13.5445	14.3219	13.1306	14.0271
NASP	not-sig	not-sig	#N/A	#N/A	#N/A	#N/A	NA	15.2767	14.9547	15.6677	15.7771	15.5165	14.9825	15.4403	14.9586	15.8592	14.5366	15.4438	15.2231	13.7711	15.1336	16.0837	14.9449	15.6225	15.4544	15.8933	14.8943	16.0203	15.6544	15.5222	15.6611	14.6642	15.9222	15.3892	15.7692	15.9398	15.4105	15.6618	15.2165	14.7112	15.8707	14.3899	15.9465	15.0383	15.2146	15.5663	14.6685	15.1694	14.8317
PROCR	not-sig	not-sig	#N/A	#N/A	#N/A	#N/A	NA	12.8363	12.3011	12.3784	12.3339	12.7788	12.9453	12.9558	12.6593	13.0069	12.9276	12.3099	12.301	13.0188	12.4295	12.5349	13.0653	12.9319	11.9936	12.9772	12.6881	12.7839	12.7046	11.602	12.2622	12.4801	11.9715	8.93828	12.2456	12.3158	12.7076	12.8284	12.4228	12.7288	12.9095	12.6913	12.6958	13.2751	11.6496	12.53	12.6183	12.5972	12.9185
VPS39	not-sig	not-sig	#N/A	#N/A	#N/A	#N/A	NA	12.6267	12.2574	11.3834	12.3548	11.2414	11.9515	11.4437	12.209	11.7664	12.8222	12.4589	11.7424	12.2561	11.4959	12.1403	12.4328	11.8273	12.0186	12.365	11.4505	11.9633	12.7943	12.2122	12.6258	11.8398	11.4268	11.4935	12.8074	12.2652	12.4415	12.2284	12.8188	12.3053	11.8837	12.5171	7.35814	12.0734	12.2567	12.311	12.465	11.9035	12.5986
EIF3C	not-sig	not-sig	#N/A	#N/A	#N/A	#N/A	NA	15.3614	15.2068	15.3861	15.7183	14.2379	15.115	16.0583	15.2223	15.6369	15.7606	15.8104	15.9076	15.2957	16.0363	16.0473	15.7409	16.2874	14.7119	15.9481	15.3404	15.8396	15.7179	15.7496	15.8922	15.3592	16.1493	14.9744	15.7462	16.0175	15.7109	15.61	15.5419	16.2799	15.7301	16.1557	16.057	15.4395	15.4499	15.7627	15.4563	15.507	15.2434
DHX29	not-sig	not-sig	#N/A	#N/A	#N/A	#N/A	NA	14.1515	13.9518	13.5396	14.3882	13.1891	14.5455	13.598	13.6899	14.6408	13.9932	13.9976	14.2409	14.3918	13.6657	14.3998	13.041	14.2135	13.638	14.0483	14.0046	14.3825	14.6399	13.9854	14.27	13.4515	13.3448	13.4947	13.7241	13.8689	14.7646	14.4851	13.3079	13.7031	14.3408	14.0582	13.7511	14.5411	13.9264	14.2582	13.8348	14.726	13.8751
HSPA4	not-sig	not-sig	#N/A	#N/A	#N/A	#N/A	NA	16.2239	15.8908	15.5412	16.0969	16.4186	16.1626	15.3564	15.7129	16.0033	15.3027	15.8257	15.694	15.7987	15.8498	16.6835	16.2844	16.0449	14.6059	15.7575	15.7338	16.5792	15.7705	15.5936	15.1237	16.2453	15.729	15.6309	15.7072	15.8042	15.9234	15.7193	15.4171	16.0235	16.2295	15.8612	15.7516	16.0609	16.1569	15.9215	15.4734	15.791	15.687
PSMD13	not-sig	not-sig	#N/A	#N/A	#N/A	#N/A	NA	14.4919	14.2051	13.7205	14.3928	14.8072	13.9333	14.5928	14.2058	14.5838	14.3481	14.2265	14.5799	13.6631	14.0383	14.9035	14.1775	14.8772	15.2526	14.0544	13.8746	15.0329	14.5552	14.8492	14.7875	13.9629	15.154	14.6012	14.9139	14.7826	14.7646	14.7552	14.0431	14.2113	15.0386	15.0252	14.8627	13.7749	13.8974	14.646	14.2492	14.753	14.1392
TTN	not-sig	not-sig	#N/A	#N/A	#N/A	#N/A	NA	15.7932	14.8054	15.0253	15.5208	15.9371	15.6343	13.6419	15.4126	15.3658	14.447	14.8546	15.3942	14.6935	15.0094	15.6035	15.5358	15.9419	14.118	15.8715	15.7307	15.7613	15.5219	15.9245	15.9758	14.5675	15.7967	16.0115	15.7411	15.7169	15.8894	15.8851	15.7471	13.872	15.5068	15.8995	15.8723	14.6859	15.6772	15.7491	15.5426	16.1576	16.4128
TRUB1	1	EMT	0.869186	0.0160113	1.56789	0.0118648	NA	15.5198	13.6781	15.026	14.0282	14.4258	13.8113	8.25096	16.1531	15.5355	13.9348	14.2576	15.1055	13.2302	14.0356	14.8713	14.2178	15.3464	13.1908	15.7401	14.1622	15.4789	12.5826	14.1165	14.3699	14.1684	14.4305	14.7076	15.5921	15.0943	14.5031	15.1709	18.1439	13.5542	14.4946	15.4141	14.2003	15.1306	14.7163	14.3044	15.5222	14.288	16.4556
PHLDB1	not-sig	not-sig	#N/A	#N/A	#N/A	#N/A	NA	14.6246	13.4612	13.1673	14.3898	15.983	13.1958	14.976	14.7764	13.162	13.4128	13.0247	13.4011	13.6171	13.1217	12.6851	13.4426	13.5866	14.2668	12.8729	13.0965	13.318	14.4593	13.1374	13.4364	13.1883	13.4449	13.5573	13.1986	12.7299	12.7193	12.9064	13.4975	13.1095	13.4095	12.8981	13.3285	13.8615	13.4565	13.3131	12.8714	15.4277	13.1946
USP19	not-sig	not-sig	#N/A	#N/A	#N/A	#N/A	NA	13.2828	12.6824	13.1106	13.5051	13.2002	12.7983	13.2276	13.3037	11.9741	13.0828	13.0922	12.2661	14.0008	13.1449	12.8655	13.4445	12.0873	12.4023	13.2762	12.9625	13.0178	11.8926	11.873	12.6356	13.3123	13.0175	11.8332	12.9787	13.2898	12.517	11.7989	12.8648	12.7427	12.914	13.101	13.4315	12.6391	11.6567	13.0341	12.7874	12.1507	11.9277
SLC25A12	2	METAB	#N/A	#N/A	#N/A	#N/A	NA	14.8372	13.6403	14.1612	14.4653	14.2295	14.9831	11.034	14.5908	14.6273	14.6781	14.9446	14.4673	14.6486	14.2558	14.4397	14.3439	14.5042	14.997	14.5738	14.2725	14.3754	14.0743	14.5402	14.2027	14.0575	14.1599	14.0523	14.4438	13.7644	14.9301	14.8432	14.3921	14.6178	13.9468	15.2192	13.6847	14.6278	14.0589	14.5301	15.0455	14.7113	14.6792
SFXN4	not-sig	not-sig	#N/A	#N/A	#N/A	#N/A	NA	13.2236	12.4611	11.8389	13.3293	14.0117	12.8648	12.4867	13.5767	13.0797	12.5071	13.296	12.4353	11.5633	12.5127	13.1734	13.0458	13.8548	11.5927	12.2356	11.9485	12.7407	10.5956	12.8036	12.0597	12.3298	13.3727	11.0839	12.8108	13.5824	13.0511	13.5218	12.2802	11.4978	11.9152	13.4379	11.1677	12.3889	12.9385	12.7497	14.0556	13.6797	13.1833
CP	4	IMMUNE	#N/A	#N/A	#N/A	#N/A	NA	15.4684	16.7242	16.1279	15.5287	17.2952	15.1081	15.9691	17.8962	15.7761	15.251	15.3126	15.7097	16.5561	15.9466	15.4342	14.7977	15.7422	16.2034	15.2586	14.7593	15.01	16.7977	14.8773	16.2012	15.7799	15.9932	15.7763	16.4937	15.4177	15.5736	15.0549	16.1385	15.1089	16.0854	15.4885	15.7188	16.3735	17.3735	15.754	15.6425	17.6701	17.8908
LDHA	not-sig	not-sig	#N/A	#N/A	#N/A	#N/A	NA	18.985	18.5976	18.872	18.9571	19.3521	19.0309	18.8092	19.2774	19.0584	17.0887	18.2933	19.0131	17.0459	19.1139	19.3491	18.8053	19.2321	19.2543	19.004	18.5934	19.575	18.9304	19.5431	19.3674	18.3558	19.7704	18.8072	19.1053	19.4069	19.0521	19.4982	19.16	18.9664	19.3362	19.32	18.9743	17.9078	18.8821	19.4224	18.9553	19.2827	19.2266
PDCD6IP	2	METAB	#N/A	#N/A	#N/A	#N/A	NA	16.4491	16.6303	15.8254	16.4178	16.1702	15.6566	15.6857	15.9357	15.7433	16.2355	16.3805	15.8254	16.617	16.3668	15.2439	16.3363	16.1004	16.204	15.7703	15.8918	16.4863	16.0402	16.4981	16.2332	15.8368	16.0576	16.3298	15.7122	15.7185	15.8802	15.6425	15.9201	16.4872	16.0698	16.1267	15.6787	16.118	15.7172	15.8595	15.9178	15.7483	16.1594
KMT2A	not-sig	not-sig	#N/A	#N/A	#N/A	#N/A	NA	11.2799	12.8859	14.9453	12.5911	14.064	15.0546	14.0767	15.2365	14.0318	13.1773	14.1351	13.8949	5.99571	15.2206	14.4561	15.6884	14.5708	14.1511	14.7204	15.0142	15.3013	14.637	15.628	14.9187	15.5647	12.5738	14.7982	14.5572	15.5208	14.8942	14.5431	14.6719	13.7955	15.1327	14.8163	15.365	10.3445	12.7748	15.4527	13.8823	11.2155	14.2149
CLCA1	not-sig	not-sig	#N/A	#N/A	#N/A	#N/A	NA	12.7179	18.1013	12.2897	17.6509	12.4455	12.9854	16.1687	14.7089	12.6084	12.7969	14.3452	12.8996	15.6366	14.9521	12.1396	12.615	12.9306	11.7102	11.3084	12.5514	12.6577	12.749	18.8607	11.8429	13.4549	12.3554	17.4823	16.2098	13.2455	15.7034	17.0279	12.4777	15.2865	16.364	12.7683	13.196	12.4724	15.7446	16.9993	15.1242	15.5316	16.2642
KIF5B	not-sig	not-sig	#N/A	#N/A	#N/A	#N/A	NA	15.9723	15.6642	15.5537	15.3483	15.9695	15.4815	15.5442	15.3377	15.4622	15.7293	15.6068	15.4686	16.1304	15.3402	15.6174	16.3712	15.39	16.1966	16.3232	15.9492	15.1979	15.7397	15.5491	15.2485	15.5381	15.6205	15.7104	15.2573	15.5463	15.5438	15.2474	15.1558	15.893	15.3731	15.1743	15.711	15.1359	15.5818	15.1095	15.6439	15.0875	15.0044
DLD	not-sig	not-sig	#N/A	#N/A	#N/A	#N/A	NA	13.6076	14.4107	13.9136	13.8408	14.2433	14.1325	16.7073	13.9841	13.8694	13.9083	13.99	13.4912	13.697	13.7703	13.6465	13.7777	13.2562	15.0459	13.7218	13.6665	13.7131	13.8998	13.7763	13.4404	13.8925	13.4083	13.9035	13.8276	13.7285	13.816	14.0091	13.9322	14.8346	13.7487	14.0027	13.7571	14.2289	13.7813	13.7305	14.3677	14.1754	13.6807
PXN	not-sig	not-sig	#N/A	#N/A	#N/A	#N/A	NA	13.0394	12.5762	12.3776	12.1293	13.4282	13.1578	13.2008	12.461	13.505	13.0713	12.1672	13.2959	11.4268	13.2946	13.3076	13.7481	12.7658	13.4252	12.4519	12.941	12.9696	12.6599	14.0056	13.3478	12.4799	13.6329	12.227	12.6674	13.0934	13.1725	14.0039	13.3479	13.2942	12.901	12.8954	12.8712	12.9869	13.4987	12.7327	13.1097	12.7357	12.1493
SEPTIN7	2	METAB	#N/A	#N/A	#N/A	#N/A	NA	15.2948	14.3947	14.8941	14.5603	14.6761	14.4253	15.8523	14.4725	14.672	15.2256	15.0047	14.8076	14.7044	14.682	14.7413	14.5089	14.9259	15.6389	14.9741	14.9664	14.7731	14.9572	14.8673	14.5126	14.7127	15.1441	14.3909	15.2653	14.8696	14.7407	14.9522	15.2265	15.101	14.6297	14.4768	14.7957	15.0713	14.3715	15.2351	15.0281	15.1427	14.9061
URB1	not-sig	not-sig	#N/A	#N/A	#N/A	#N/A	NA	9.95371	12.0785	12.105	11.5651	12.8579	11.543	13.8022	12.1849	12.4012	12.8804	11.3096	13.1201	12.591	11.8785	11.5335	12.417	12.7707	14.2574	11.2079	11.8421	12.7567	12.5283	12.9983	12.9846	12.7943	11.5728	12.1537	12.4378	12.0483	12.6132	12.5912	13.8383	12.5958	12.0678	13.0143	11.8637	13.7473	12.9333	12.0297	12.9733	12.71	10.5348
POLR2B	not-sig	not-sig	#N/A	#N/A	#N/A	#N/A	NA	13.1006	13.7185	13.6915	12.7133	14.1272	13.9025	13.453	13.6158	13.7764	13.9467	13.9478	13.7842	12.9962	13.2588	13.5701	13.5282	13.645	13.9001	13.3144	13.6058	14.0859	12.6644	13.9299	13.3236	13.814	13.9017	13.5035	14.0583	14.1458	13.7174	14.0113	13.6468	13.9885	13.0701	13.5221	13.6899	13.4389	13.3082	13.3775	13.6908	12.7363	13.5052
CYFIP2	1	EMT	0.645793	0.0100828	1.76348	0.0130229	NA	14.9092	13.3858	13.7143	13.4439	13.1847	13.0226	15.9271	14.812	14.1868	14.0937	14.7531	13.9191	13.8165	13.2701	13.8736	14.0474	13.2878	14.9987	13.9369	13.7035	13.9482	13.906	14.6693	13.5217	14.0923	14.6822	12.7054	15.0809	12.6003	13.0203	12.5078	13.9096	14.8734	14.4587	13.8739	11.2242	12.866	13.8417	14.2255	13.4682	14.3959	14.1098
SEPTIN2	1	EMT	0.206749	0.0212966	6.10899	0.0130784	NA	16.2958	15.7765	16.0264	15.5618	16.006	16.0954	15.8882	15.2264	15.7012	16.5034	16.0502	15.6514	16.9541	15.6078	16.0169	15.8603	16.1681	17.0587	16.0872	16.3964	16.009	16.0152	15.8161	15.4603	15.9279	15.9	15.7955	15.9644	15.6173	16.0266	15.8887	16.1156	15.977	15.7284	15.2259	15.6158	16.069	15.5055	15.6883	16.2866	15.476	15.6685
SLC44A1	not-sig	not-sig	#N/A	#N/A	#N/A	#N/A	NA	14.1035	14.2077	14.4997	13.2386	14.609	14.4865	12.9781	14.2204	13.8119	13.1182	13.9411	13.4048	13.4618	14.6874	14.0511	14.6966	13.7189	12.4877	14.0206	13.7047	14.2146	13.077	14.0345	13.8785	13.4637	13.8827	13.0133	14.1268	13.9962	14.2905	13.7872	14.0457	13.5393	14.2197	14.4989	14.0067	13.774	14.0746	14.4412	14.4962	13.3646	13.2823
CAND1	not-sig	not-sig	#N/A	#N/A	#N/A	#N/A	NA	17.0931	16.5948	17.0725	16.4352	16.6819	16.5452	16.3451	15.7646	17.0059	16.6712	16.6477	17.3632	16.9097	16.4147	16.769	16.6439	16.4875	17.4294	16.8499	16.502	16.5712	16.5414	17.012	16.9479	16.4018	17.1769	16.1948	16.7569	16.7576	16.7913	16.6327	16.2874	16.9335	16.4697	17.0645	16.3172	16.1448	16.5937	16.737	17.0142	16.5305	16.5779
UGT2B17	not-sig	not-sig	#N/A	#N/A	#N/A	#N/A	NA	12.159	12.7553	15.7095	16.2203	15.1773	9.74907	13.3332	13.279	17.3878	14.9402	14.2816	16.0187	12.0396	15.6623	14.401	13.7449	15.5786	15.4104	14.5053	14.342	15.9172	14.8646	17.3788	12.5121	12.9343	13.3349	16.9961	13.3872	16.5708	14.3364	15.5998	13.6538	13.4159	16.6946	14.3258	12.8198	12.3072	14.7244	16.9203	14.7611	15.2262	17.7313
PPP4R3A	not-sig	not-sig	#N/A	#N/A	#N/A	#N/A	NA	13.6493	14.0306	13.9539	15.7454	14.3651	14.1762	16.0592	13.6864	13.9085	13.9227	13.9074	13.752	13.9318	13.6673	14.0358	13.8196	13.9349	12.9626	13.8537	13.7557	14.0679	13.8323	13.7317	13.9943	14.1247	14.0749	15.7825	13.9334	14.0848	13.8066	13.7095	13.3277	12.8247	14.0401	14.073	14.3849	14.3015	13.3348	15.4514	13.9013	13.6322	12.8758
A1BG	4	IMMUNE	#N/A	#N/A	#N/A	#N/A	NA	14.2565	14.9927	14.3846	14.6785	15.418	13.9373	15.3552	15.758	14.8749	14.9275	14.4448	14.6797	14.2386	14.452	13.7993	13.617	14.6604	15.902	14.3188	13.8677	14.0746	15.722	13.5186	15.2673	14.5067	14.4107	14.2369	14.7554	13.9603	14.7228	13.9313	15.202	11.7993	15.2476	14.761	15.06	15.2354	15.3599	14.5399	14.2065	16.0583	16.4417
PLOD3	not-sig	not-sig	#N/A	#N/A	#N/A	#N/A	YES	14.0611	13.4432	13.2556	13.2621	13.727	14.0288	17.1055	13.485	13.0906	12.5848	13.3452	13.5132	14.2495	13.1255	13.1717	13.322	13.7269	14.1322	13.2001	14.0634	13.2703	13.3078	13.2029	13.7026	13.6316	13.3202	14.6541	13.1243	13.1472	12.9267	13.1513	13.1186	14.6504	13.4524	14.0975	13.1863	14.4913	13.8693	13.3683	13.6208	14.2493	12.9699
RPS4X	not-sig	not-sig	#N/A	#N/A	#N/A	#N/A	NA	16.5827	16.6446	16.4539	16.5537	16.1837	16.2354	16.2493	16.5026	16.6731	16.9035	16.97	16.593	15.0207	16.4841	16.8033	16.489	16.7779	17.368	16.5919	16.4238	16.8644	16.2049	16.8249	16.7596	16.1577	17.0225	16.6623	16.681	16.8255	16.9219	16.796	16.2729	16.8042	16.8893	16.0518	16.4383	16.7188	16.3022	16.5489	16.5541	16.4658	16.6226
PEPD	not-sig	not-sig	#N/A	#N/A	#N/A	#N/A	NA	15.9029	15.3996	15.733	15.9538	16.7288	15.9802	16.1681	15.8237	14.9608	15.7614	15.7861	15.2788	17.433	14.6736	14.9695	14.7808	15.2873	15.9001	15.0162	15.506	14.5808	16.7374	15.2503	14.5301	15.691	14.8813	15.7581	15.2682	14.7451	14.8294	15.0125	14.8835	16.7826	14.7656	14.935	14.2296	15.888	14.5928	16.9954	14.8917	14.9183	15.1711
TOP1	3	CANONICAL	#N/A	#N/A	#N/A	#N/A	NA	14.5709	14.6873	15.7705	15.2237	13.6684	15.5625	16.1961	13.6618	15.5398	16.1235	15.1498	14.6087	15.0462	15.3842	14.9353	15.2888	15.4675	14.5642	15.1558	15.8495	15.3783	13.8835	14.6846	14.9506	15.6986	16.144	15.7028	15.2603	14.7729	14.7981	15.7364	14.3453	16.284	15.0668	14.7161	15.0628	15.1922	14.9228	14.6831	16.1226	14.4344	14.4663
DNHD1	not-sig	not-sig	#N/A	#N/A	#N/A	#N/A	NA	12.4673	14.1038	14.3961	14.9321	12.56	13.5038	14.8072	13.7656	13.4356	14.2625	14.46	15.3701	12.519	13.9312	13.8267	13.7884	14.8544	13.8151	13.731	14.3853	14.0332	14.9796	12.1111	13.4876	13.4196	13.3543	13.5358	12.5876	13.9317	13.3781	12.6949	13.1953	12.9862	12.7267	12.7797	12.4346	12.7201	13.1902	13.7162	14.7822	15.4459	14.6745
HLA-DRA	4	IMMUNE	#N/A	#N/A	#N/A	#N/A	NA	14.0476	14.6105	14.3985	15.1628	14.6784	15.3619	17.8918	14.5776	15.7297	15.272	14.371	15.8943	15.5475	14.8836	14.8919	14.928	15.6081	16.0151	15.7397	14.4744	14.6473	15.9763	15.165	15.1239	14.7297	13.4544	15.9189	17.0167	14.8111	16.4886	15.4182	16.1266	16.3142	16.2701	14.4882	14.9374	15.5481	16.7528	15.9886	15.0616	16.7801	16.2098
APCS	1	EMT	0.758238	0.00890407	1.60917	0.0143007	NA	18.0821	15.2745	15.6773	15.8599	16.4261	13.9809	13.2885	16.8103	15.7832	14.7614	15.1557	15.9332	15.9185	14.6015	14.5295	13.8434	14.9559	17.7466	15.072	14.4985	14.6072	16.3261	14.7681	15.1505	14.131	14.5263	14.0829	14.8219	15.4721	15.0358	14.2701	15.8031	13.3267	15.3517	14.3501	15.272	16.4418	16.0598	16.0424	14.6389	16.9845	17.0876
KPNA6	not-sig	not-sig	#N/A	#N/A	#N/A	#N/A	NA	14.1383	14.4964	14.4466	14.6774	14.1531	14.1116	12.3501	14.5567	14.5352	13.5892	14.4833	13.9297	14.746	14.5045	14.3797	14.556	14.7161	12.2764	14.3764	14.0299	14.8129	14.6845	14.4479	14.7572	14.43	14.1437	13.4108	14.6766	14.5358	14.7952	14.2126	14.3618	15.9142	14.3257	14.1044	14.7848	14.2071	14.7292	14.4816	14.4651	15.1324	14.5041
RPS8	not-sig	not-sig	#N/A	#N/A	#N/A	#N/A	NA	18.2011	18.1032	18.0922	17.7182	17.8703	18.0141	17.2889	17.8413	18.2007	17.9387	18.3241	18.395	17.806	17.9766	18.4141	18.2182	18.0691	16.17	18.1359	18.3739	18.21	17.8683	18.2945	18.0865	18.4795	18.156	18.3664	18.109	18.3442	18.1467	18.1612	17.942	17.1562	18.0377	18.0472	18.2832	18.1402	18.0323	17.8906	17.961	17.1936	17.4203
PGM5	not-sig	not-sig	#N/A	#N/A	#N/A	#N/A	NA	15.0312	16.1262	14.0564	14.1414	15.8668	13.3267	16.6777	14.4277	13.611	15.1567	15.5086	15.4926	15.4383	14.8616	13.8389	14.1037	13.2274	16.5831	14.0614	14.8433	13.6909	14.794	13.0668	13.7325	13.7465	12.9629	17.7312	13.6398	15.8644	15.184	14.2956	15.5005	15.2033	13.9042	14.0174	14.2748	14.7084	16.105	14.586	13.7714	16.5366	16.2432
SCAMP2	not-sig	not-sig	#N/A	#N/A	#N/A	#N/A	NA	14.6387	14.2197	14.8717	15.2202	14.1533	14.1915	13.2781	15.0228	13.6411	14.0452	13.9546	14.9421	15.2997	14.3524	14.9539	15.0092	14.5672	15.9719	14.7032	15.0209	14.5126	14.475	14.5768	14.9127	14.7205	14.6455	14.478	15.0452	14.8643	15.0159	15.0804	15.4736	13.9819	14.6064	14.6729	15.1121	15.5009	15.3315	14.5699	15.263	15.6137	14.7001
IRF6	not-sig	not-sig	#N/A	#N/A	#N/A	#N/A	NA	11.6553	11.0617	11.2794	9.84142	12.1959	11.4192	9.58801	11.0951	10.6527	11.9409	10.5084	12.907	11.7653	11.6792	11.6491	12.1349	11.5733	12.871	11.0686	12.4985	10.424	10.1692	12.3825	12.4254	11.5452	10.6406	11.703	10.8829	11.3002	10.008	12.0297	11.3765	10.9596	10.8516	11.4648	10.1521	10.451	10.8165	11.4662	11.8357	11.0031	11.6508
PTMS	not-sig	not-sig	#N/A	#N/A	#N/A	#N/A	NA	17.7663	15.3018	17.1264	16.5687	16.5548	16.1365	16.782	15.6253	16.6546	15.295	15.3208	17.5796	16.4072	16.841	16.9491	16.6214	16.4273	14.4024	17.0068	17.0544	17.498	16.6755	16.7972	16.9974	17.4569	16.372	16.9916	16.7862	16.392	16.6866	17.0693	17.351	15.7107	16.1665	17.429	16.6831	17.0339	15.7038	17.5444	17.0021	16.5598	16.4788
RPL27A	not-sig	not-sig	#N/A	#N/A	#N/A	#N/A	NA	16.3027	16.8022	16.756	16.3515	16.4682	16.5379	16.6444	16.5735	16.5961	15.8656	16.9143	16.5464	15.5791	16.3662	16.9157	16.5749	16.7322	14.0262	16.4482	16.7054	16.6938	16.55	16.7188	16.5407	16.3551	16.599	17.0371	16.5647	16.6696	16.5376	16.5844	16.2381	17.1444	16.5973	17.0558	16.9484	15.953	16.6963	16.7329	16.6982	15.9148	15.9401
AP1M1	not-sig	not-sig	#N/A	#N/A	#N/A	#N/A	NA	14.5329	14.254	14.5298	14.3886	14.6182	14.624	12.1858	14.3447	14.7188	14.6926	14.3622	14.2459	14.3043	14.3109	14.6486	13.7054	14.6209	14.3644	14.2732	14.4603	14.3091	14.5298	14.426	14.495	14.1478	14.3876	14.4127	13.8531	14.1957	14.2942	14.2617	14.101	15.0793	14.3401	14.9359	13.939	14.5659	14.5097	14.5168	14.6214	14.4313	13.7458
RAB13	not-sig	not-sig	#N/A	#N/A	#N/A	#N/A	NA	14.3545	14.007	14.2578	13.9413	14.4901	14.1686	16.8685	14.6549	13.7034	14.2845	14.3029	14.1413	14.8142	13.8483	14.0294	14.0287	14.0661	12.6642	14.1232	14.0509	14.0197	14.9707	14.1299	14.2414	14.8137	13.5102	13.7064	14.1617	13.7083	14.7522	14.1867	14.093	13.1139	14.5748	14.6422	14.5137	14.6345	14.9818	14.2191	14.3629	14.9275	15.1757
BRPF1	1	EMT	0.72266	0.013559	1.58549	0.0161899	NA	19.824	14.9582	19.3559	19.7884	18.8439	18.6164	14.2812	20.4829	18.8803	16.4591	16.5658	18.3002	17.253	18.7817	18.5995	17.9492	18.8301	17.4743	18.832	17.684	18.8376	20.1364	18.4507	18.5071	17.1786	17.4791	17.5166	19.127	19.3339	18.7815	19.5771	20.9035	15.0778	18.6476	18.567	18.661	19.8137	18.3838	18.6783	19.153	19.9833	20.106
RFC5	not-sig	not-sig	#N/A	#N/A	#N/A	#N/A	NA	14.5493	13.7739	14.1884	14.6321	14.3677	14.7782	13.8014	14.9168	14.576	14.5844	14.2387	13.8075	14.6493	13.7401	15.1849	13.7066	14.3842	14.4604	14.8409	13.6996	14.5114	13.9211	12.9064	14.3302	14.5881	13.9762	13.3896	13.7823	14.7687	14.0553	13.8126	13.9415	14.9756	14.2141	14.2853	14.592	13.6648	14.9485	13.9893	13.8697	13.9313	12.8544
TACC2	not-sig	not-sig	#N/A	#N/A	#N/A	#N/A	NA	17.7224	13.2506	17.6123	15.2024	16.4216	15.1057	15.1327	19.3551	15.8796	18.5705	17.0138	17.3027	19.1169	18.9411	17.3018	19.0868	18.9329	14.8282	19.2885	18.1301	16.5547	19.9803	17.4195	19.4492	16.3504	18.534	16.3185	18.4529	19.3888	15.3235	15.405	17.9011	14.4561	18.2136	16.8126	14.4989	18.2715	16.2273	16.8214	18.3149	15.938	16.259
TXNDC17	not-sig	not-sig	#N/A	#N/A	#N/A	#N/A	NA	13.6885	15.5203	15.2285	14.8824	14.0641	15.0883	15.2693	15.5175	15.045	15.0485	14.9091	14.4113	15.1448	15.8099	15.2559	15.3213	14.7892	14.3028	14.9246	15.44	15.1643	14.9314	15.5777	14.7972	14.6871	14.6301	14.7411	15.6477	15.5524	14.5363	14.4045	14.9036	15.2567	15.1009	15.7985	14.7491	14.0884	14.9193	15.5296	15.0397	14.8936	15.2435
TMEM50A	not-sig	not-sig	#N/A	#N/A	#N/A	#N/A	NA	13.2549	12.6775	13.2042	12.6302	13.1555	12.7464	14.759	13.1409	14.3126	12.3721	12.8766	12.8923	13.2668	12.25	12.3947	12.1638	13.3759	11.9663	12.7515	12.1109	13.174	12.362	13.4845	12.802	12.5475	12.6316	12.0729	12.6057	12.594	12.2553	12.7928	12.6985	14.7809	12.087	12.5976	12.5159	13.631	12.8784	13.2479	12.0657	13.6851	14.1072
TINAGL1	not-sig	not-sig	#N/A	#N/A	#N/A	#N/A	NA	14.1539	13.4594	14.1151	15.0665	15.3966	11.813	10.1846	15.6748	12.0513	11.8864	11.5143	12.4785	12.3201	12.1842	11.995	12.3808	12.3688	14.3819	11.7719	11.5914	12.0653	14.7124	12.3131	11.1871	10.7755	11.8966	12.5061	10.1931	12.119	12.605	12.0381	11.0948	12.9495	9.69961	12.1999	10.909	11.4833	13.3076	12.5747	13.4517	13.8224	11.2168
SPATA20	not-sig	not-sig	#N/A	#N/A	#N/A	#N/A	NA	12.4497	13.5009	12.9887	12.4048	13.3889	13.753	13.8468	12.3681	15.0642	12.3761	12.795	15.1929	11.6929	12.1795	14.4421	12.6082	15.5506	13.6722	13.3715	12.8956	14.2555	12.7716	15.3218	14.7899	12.3701	11.7284	10.7499	12.493	12.3626	15.6056	14.595	12.0353	11.9973	13.1858	13.2597	13.6675	15.0673	13.2594	12.5568	13.1872	13.2939	14.7447
COX6C	not-sig	not-sig	#N/A	#N/A	#N/A	#N/A	NA	15.3844	15.4107	15.1922	16.7867	16.4717	16.6977	16.7171	15.5825	15.6325	14.8517	13.9649	15.5312	13.4433	16.3593	15.7497	16.3438	16.7475	13.8713	15.021	15.5148	16.5227	14.433	17.1944	15.3636	15.1146	15.9702	16.1443	16.1362	16.4629	17.14	16.3859	16.333	16.8756	16.1938	14.8483	15.629	13.7093	15.2338	15.8307	17.053	17.0614	16.4144
TUT7	not-sig	not-sig	#N/A	#N/A	#N/A	#N/A	NA	13.2334	12.4493	12.8707	13.013	12.9161	13.5722	13.2638	12.792	11.4927	13.3915	13.1789	13.2816	12.8076	13.014	12.6212	13.5187	13.0069	11.7258	13.151	12.9	12.4543	13.0337	12.0864	11.1805	12.7329	12.8683	12.1401	12.2712	13.2613	11.6218	11.7271	12.4185	12.9073	12.5818	12.5298	12.4916	11.8097	11.8983	12.2159	13.4217	11.9254	11.5836
ATE1	not-sig	not-sig	#N/A	#N/A	#N/A	#N/A	NA	13.368	11.9061	12.7504	12.1506	13.9471	12.027	11.7078	13.8208	12.2291	12.9718	12.736	12.5827	13.1531	12.1543	12.1331	12.9432	13.0139	13.9672	12.6438	12.1193	12.5751	13.8831	12.1409	13.0973	12.7133	12.1497	12.341	12.6978	11.9013	13.148	12.076	13.2044	12.4083	11.8316	12.2935	13.2288	12.7203	12.9898	10.7637	12.2066	10.8359	12.595
EFTUD2	not-sig	not-sig	#N/A	#N/A	#N/A	#N/A	NA	15.9237	16.0147	16.0271	16.1327	16.2813	16.3405	15.402	15.4649	16.0486	15.7605	16.3679	16.0281	16.1127	16.0528	16.3424	15.7863	16.36	15.1961	15.7094	15.9652	16.5026	15.8795	15.796	16.0817	16.1084	16.4215	15.8045	16.1237	16.0077	15.4986	16.2737	15.4978	16.11	15.9089	16.5687	16.3424	15.999	15.8202	15.7152	16.2404	15.5004	15.5926
GSN	not-sig	not-sig	#N/A	#N/A	#N/A	#N/A	NA	16.7141	15.3327	16.32	16.4577	16.5338	16.202	17.0063	16.396	16.0166	15.8387	15.5635	16.5702	15.617	16.7378	16.0213	16.6914	16.1779	16.6461	16.6583	16.5294	16.4083	17.1428	16.7027	16.8458	15.2771	16.2241	15.928	16.721	16.1292	16.2605	16.1463	16.3788	15.2197	16.7796	16.3891	16.7848	15.502	16.6763	16.9111	16.0372	17.3647	17.033
XPO7	not-sig	not-sig	#N/A	#N/A	#N/A	#N/A	NA	14.8674	14.3925	14.4006	14.2348	15.0313	13.4361	13.4373	14.1062	13.9827	14.4496	14.3586	14.6128	13.9589	14.4569	14.9494	14.407	13.8447	14.1348	14.6276	14.5437	15.5283	14.0773	14.8908	14.9211	14.781	15.1799	14.1519	15.1508	14.8912	14.514	15.108	14.373	15.5774	14.7128	13.908	14.8749	13.6712	13.8634	14.8467	14.0248	15.0618	14.8207
COL1A2	1	EMT	0.640169	0.0145901	1.64086	0.0176174	NA	17.0236	13.4295	16.654	16.6817	17.5766	15.8375	17.5355	18.0151	16.8726	13.3764	15.6665	17.0031	15.803	15.4997	15.4878	15.9935	16.0434	14.7104	16.6447	15.7673	16.9408	17.6364	16.7155	16.0586	14.2716	15.8803	15.8019	16.641	16.4498	17.111	16.9647	18.9928	15.5663	16.3905	15.7775	16.3775	17.531	15.8808	16.5846	16.3474	17.8995	18.1266
PPIL1	not-sig	not-sig	#N/A	#N/A	#N/A	#N/A	NA	13.4019	12.3264	12.8087	13.4645	14.7619	13.3261	12.9705	13.1036	13.2859	12.2822	12.8625	13.1942	12.0027	13.1866	12.8908	13.1491	13.9244	11.9463	13.6798	13.5231	14.3226	13.0116	13.345	13.6121	13.4544	13.7498	12.6093	13.4529	13.4286	13.8082	14.3066	13.4985	13.008	13.5911	14.0787	13.7958	13.5727	13.4251	12.9437	14.0042	13.6111	13.7909
TUBG1	not-sig	not-sig	#N/A	#N/A	#N/A	#N/A	NA	14.4953	13.0927	13.0647	14.2601	13.7178	12.7156	19.5134	13.6124	13.3311	13.3665	14.4979	13.7565	11.7413	12.3169	13.6882	12.9564	13.8786	14.3523	13.02	13.4141	13.154	11.8803	12.9255	13.448	14.1127	13.9793	14.5815	12.9932	13.7034	12.7446	13.8341	12.5675	13.7156	13.568	13.2616	14.9544	13.6392	14.3201	14.3029	13.7375	13.664	14.0005
TXN	not-sig	not-sig	#N/A	#N/A	#N/A	#N/A	NA	16.4219	16.7486	15.9874	15.5939	16.8262	16.8138	16.723	15.6521	15.932	15.8031	15.8199	16.1376	16.4394	15.9842	15.7281	16.6736	16.1214	17.117	16.0949	17.0653	15.7413	15.9896	16.0868	16.3864	16.1744	16.1133	16.8999	16.5356	16.3984	15.6755	15.8734	16.363	17.043	16.1159	16.1417	16.1789	16.7479	16.484	15.6589	15.5337	16.0578	15.6143
NCAPD3	not-sig	not-sig	#N/A	#N/A	#N/A	#N/A	NA	14.7509	10.9964	13.972	14.5394	16.5586	12.3592	12.5597	12.9577	13.5312	12.5259	13.9325	13.2687	13.13	13.5599	13.4667	11.8896	12.9939	12.1613	12.7266	11.2078	12.9827	13.5932	12.4849	12.3911	12.4077	13.1417	14.2629	12.5204	13.7438	15.7397	13.3675	14.719	13.1718	12.917	10.805	14.1108	12.9775	14.0162	12.2587	13.6295	11.7922	15.5658
VAT1	1	EMT	0.281605	0.0235928	3.16496	0.0179317	NA	15.6332	15.3484	14.8799	15.5505	15.7897	14.8397	16.2123	15.9371	15.2742	15.1366	15.3131	15.1526	15.964	15.5323	15.3331	14.5895	15.1853	15.3197	15.2164	14.9331	14.7823	16.3317	14.7156	14.8014	14.9111	13.9257	14.5438	16.202	14.5186	15.5928	14.5941	15.6173	15.1692	15.1928	14.651	14.9035	16.0004	15.9169	15.5004	14.9823	15.8611	15.6231
ABRAXAS2	not-sig	not-sig	#N/A	#N/A	#N/A	#N/A	NA	13.442	12.4797	12.8704	13.293	13.4391	13.3003	13.0286	12.0692	13.2967	13.283	13.3199	13.4124	13.1402	13.0615	13.4234	13.5582	13.5196	11.6891	13.5848	13.4035	13.2225	13.0636	13.2657	13.2697	13.3464	13.8585	12.9445	13.1272	13.4882	13.0436	13.4133	13.4699	14.0461	12.9417	13.2088	13.556	12.6963	13.0024	13.1694	12.8537	12.3301	13.0338
DEFA3	4	IMMUNE	#N/A	#N/A	#N/A	#N/A	NA	11.8462	11.4657	14.1061	13.7318	14.8331	14.7724	16.3945	17.0959	14.0364	11.3313	12.317	12.4916	10.6537	13.9599	12.9175	13.1566	13.6244	12.9552	13.4504	11.6594	13.5449	15.1402	13.2191	13.4135	11.801	11.4712	13.6971	13.0845	13.8575	14.3833	14.0029	13.7866	14.2296	14.9543	13.7782	15.2421	10.73	16.3757	15.6096	13.4597	14.8757	14.5743
EXOC2	not-sig	not-sig	#N/A	#N/A	#N/A	#N/A	NA	13.9612	13.9263	13.3659	14.0791	14.113	13.9271	13.7693	13.7733	13.8656	13.7354	14.1481	13.7591	13.9114	13.7479	13.7004	13.8257	13.9028	14.9693	13.8374	13.7147	13.6208	13.8955	13.7475	13.827	14.5096	13.9824	13.7921	13.8637	13.6905	13.7724	13.8317	13.8073	12.901	13.9302	14.3306	13.4837	14.5191	13.9366	13.5036	14.0665	14.0925	13.3961
SEC22B	not-sig	not-sig	#N/A	#N/A	#N/A	#N/A	NA	16.7261	16.2179	15.8876	15.7289	17.0845	15.6746	15.8225	15.902	15.7849	16.1639	16.5672	16.7356	16.5511	16.5478	16.5239	16.7138	16.8944	15.5327	16.3251	16.4836	15.9206	16.612	16.9437	16.3676	16.2899	16.6535	15.9375	16.7361	16.4464	16.6757	16.6801	16.3279	16.8888	16.4777	16.6261	16.9259	16.79	16.3745	16.6357	17.1417	16.7466	17.2433
MAPRE1	not-sig	not-sig	#N/A	#N/A	#N/A	#N/A	NA	15.2927	15.2278	16.0881	15.4732	14.5846	16.045	15.2427	14.5093	15.6445	15.6767	15.4096	15.104	15.1452	15.4476	15.1728	15.9343	15.6729	15.3522	16.1237	16.1923	15.7208	15.6312	15.0542	15.3811	15.2735	16.2033	16.7814	15.5214	15.3401	15.3242	15.9098	15.258	15.6926	15.53	15.633	15.3025	15.2596	14.9843	15.3386	15.6554	14.59	14.6363
SNX5	not-sig	not-sig	#N/A	#N/A	#N/A	#N/A	NA	15.0564	15.0655	14.7218	14.9225	14.969	14.7089	12.3807	15.1619	14.8218	15.1659	15.0429	14.7733	14.8841	14.7681	14.8989	15.2595	14.4364	14.9251	15.3376	15.2826	14.9914	14.6724	15.0332	14.7606	14.8746	14.8243	14.9443	14.9085	14.64	14.9308	14.5884	14.641	14.9852	14.7635	15.1035	14.7898	14.6022	14.7955	14.4312	14.5357	14.6999	14.6736
NIPSNAP2	2	METAB	#N/A	#N/A	#N/A	#N/A	NA	13.5397	13.4994	12.9677	13.8179	13.6952	13.015	17.5257	12.7428	12.6617	14.3228	13.2071	12.0304	12.6558	13.2813	12.5866	12.9129	13.1334	11.867	12.284	13.5084	13.166	12.4952	13.1243	13.085	12.3126	13.4617	13.5485	13.2335	12.5331	13.6659	14.4949	12.7519	13.653	12.583	13.9552	12.4414	13.0194	12.787	13.0082	13.5714	12.5523	13.164
FNBP1L	not-sig	not-sig	#N/A	#N/A	#N/A	#N/A	NA	12.9217	12.6147	13.0774	11.7509	13.4102	10.5601	12.9457	14.0976	12.3721	13.1374	12.7005	12.8712	13.7486	12.1696	13.409	12.7839	13.0779	11.9718	13.1562	12.3404	12.5106	11.5594	13.0468	11.7663	12.6339	13.1609	14.4205	11.1136	13.414	13.5568	13.1247	11.4398	12.7949	12.3653	11.1915	12.9536	11.8664	11.2707	12.8073	11.2701	11.6521	14.6945
LSM4	not-sig	not-sig	#N/A	#N/A	#N/A	#N/A	NA	13.2007	13.2056	13.5688	14.2355	12.5044	13.2322	13.3588	12.7827	12.0109	13.0325	12.5988	12.4137	12.7114	12.9774	13.2419	13.7744	13.4251	12.5717	13.3102	14.0473	13.1487	12.7719	12.406	12.9653	13.6298	13.4524	11.6512	13.4325	13.6051	11.8148	12.6537	13.4891	15.5147	13.8378	13.6631	13.8311	12.5249	13.4618	13.3524	12.7952	12.7414	12.7606
PLEC	not-sig	not-sig	#N/A	#N/A	#N/A	#N/A	YES	17.967	15.8652	16.4361	16.8749	15.379	16.3929	17.0037	15.8624	17.0073	16.6165	16.2955	16.9224	16.0894	16.91	16.5921	16.3386	16.3758	17.8433	16.0053	16.4034	15.982	17.8101	17.1342	16.7392	16.3585	16.1373	15.9082	16.6405	16.8612	16.3231	16.2872	17.0497	16.2339	16.1892	16.5484	16.7017	17.5037	15.9638	16.5883	17.3093	16.661	16.7636
C7	4	IMMUNE	#N/A	#N/A	#N/A	#N/A	NA	14.2352	14.0148	13.4691	14.2925	15.2459	13.0213	15.0579	15.3293	14.2846	13.0858	13.9244	14.0897	13.7098	13.9971	14.1174	13.1219	13.9761	13.2798	13.2684	14.1894	13.8389	14.6208	13.6508	14.1181	13.7594	13.7981	9.08484	13.2408	13.655	13.062	13.7601	14.2899	13.6449	13.9957	14.1689	13.9708	14.488	14.614	14.9992	13.64	14.566	15.039
CDC37	not-sig	not-sig	#N/A	#N/A	#N/A	#N/A	NA	14.4263	14.628	14.5259	15.4067	15.2762	14.4913	15.4747	14.0897	14.426	15.0645	15.0284	14.1482	14.8575	15.191	14.8099	15.1253	15.192	15.8286	14.6539	15.0284	14.8931	15.6775	14.616	14.3123	14.5372	14.3423	15.5012	14.1987	14.8155	15.3203	14.2225	14.5815	15.5313	14.8538	14.3794	15.3613	14.0367	15.207	14.6955	15.2566	15.3299	13.8126
SERPINF2	4	IMMUNE	#N/A	#N/A	#N/A	#N/A	NA	13.5468	15.3408	14.5717	14.2996	15.8303	13.4768	14.97	17.1169	14.9006	12.5638	13.6864	14.2101	13.7208	13.9499	14.0764	13.1334	14.7973	14.5038	13.7803	13.7325	13.2889	15.7162	13.3747	14.8465	12.9898	14.9365	13.5652	14.5638	12.6311	14.952	13.9086	14.8204	12.3207	15.0095	14.0028	14.6316	14.0766	14.6815	14.4182	13.8037	15.8406	15.9569
H2AC8	not-sig	not-sig	#N/A	#N/A	#N/A	#N/A	NA	16.3235	16.5823	16.022	16.3889	17.162	16.9322	17.1914	15.9273	16.0005	16.0279	16.2298	15.6347	16.077	15.9219	16.5491	16.4679	15.9256	15.5657	16.8509	16.9739	16.7826	16.3453	16.0941	16.4964	16.8452	16.6132	17.4709	16.3489	16.2047	16.2409	16.5559	16.591	19.9453	16.6761	16.4973	17.4401	16.1693	16.5987	16.6266	16.9531	16.6126	16.1585
ANO6	1	EMT	0.238033	0.0366407	4.98867	0.0195067	NA	14.5462	13.9068	13.6642	13.9319	13.3455	13.6137	13.9451	14.2095	13.0946	12.951	13.2034	13.8938	14.0749	13.232	13.4588	13.4485	13.6906	12.6293	14.0679	13.3787	13.283	13.9091	13.456	14.2173	13.3605	14.4649	13.5701	13.5923	13.0268	14.1865	13.9012	13.3852	13.0968	13.8711	11.9498	13.6877	13.9069	13.2038	12.7517	13.9016	13.8314	13.954
ECE1	not-sig	not-sig	#N/A	#N/A	#N/A	#N/A	NA	13.7987	13.2329	13.6165	14.1307	12.2006	13.5788	14.1549	13.7419	13.0665	12.7062	14.1328	14.0538	13.886	13.2891	14.3786	14.0993	13.7656	14.4265	13.2365	12.9043	13.1586	13.5516	14.1741	13.4679	14.3673	13.5767	14.5458	13.2629	13.7203	13.9199	13.9856	12.7951	12.8519	13.7859	12.6419	13.8635	14.7378	14.5508	14.0054	12.7922	15.1832	13.3679
LRCH1	not-sig	not-sig	#N/A	#N/A	#N/A	#N/A	NA	14.41	15.3926	13.52	13.9984	13.9469	13.8631	13.2353	14.1519	14.4363	13.7575	14.0765	14.0343	14.9609	14.5703	13.5639	14.0503	13.909	11.0667	13.6666	13.7045	12.9507	15.1586	15.8385	14.3848	14.1854	14.142	15.8323	14.1512	14.2809	13.6446	14.6016	13.9468	14.6622	13.9598	12.412	14.3359	14.1686	14.381	14.6568	13.9795	14.615	14.7591
RAN	not-sig	not-sig	#N/A	#N/A	#N/A	#N/A	NA	17.854	17.9814	17.969	17.9283	18.0638	18.0913	17.6616	17.643	18.2211	16.6901	17.8544	17.8026	17.8735	17.6996	18.1691	17.9971	18.0289	15.8392	18.1337	17.967	18.1864	17.9065	17.9213	17.9601	18.055	18.1116	18.1646	17.9707	18.0679	18.0101	18.0201	17.7114	18.4033	18.2084	18.1601	18.3538	17.8627	18.0886	18.1072	17.6436	17.6833	17.6393
LTV1	not-sig	not-sig	#N/A	#N/A	#N/A	#N/A	NA	11.7311	13.4204	13.3371	12.7074	10.991	11.8568	12.2598	11.9119	13.3135	11.3092	12.7007	13.6961	12.2273	11.9055	13.3154	13.4107	12.746	12.5236	13.5204	13.173	13.2102	11.6971	12.0452	13.5188	13.0649	11.9602	10.6178	12.998	13.3265	12.6878	12.3159	12.2839	15.1756	12.9522	13.0977	14.2725	11.4479	12.3154	11.3446	11.2456	12.2744	11.8198
MEAK7	not-sig	not-sig	#N/A	#N/A	#N/A	#N/A	NA	14.5753	15.7442	14.5819	14.9818	15.8732	14.1071	11.4003	15.0399	15.2763	14.2799	14.6782	14.5482	15.1776	15.0173	14.3063	14.0674	14.2576	16.3118	14.8174	14.3129	12.9327	15.8625	13.618	12.4102	14.5662	13.8145	14.258	13.9431	13.6832	14.7111	13.7198	15.188	15.939	13.2258	12.4614	13.1386	11.603	16.2876	14.4489	14.9374	16.2056	14.7788
AHR	not-sig	not-sig	#N/A	#N/A	#N/A	#N/A	NA	16.4611	14.5201	13.6694	15.6658	15.988	15.2456	11.4359	13.8726	15.7297	16.0031	14.1191	15.9705	13.9532	15.7185	15.4678	16.0251	15.6774	17.1941	15.7659	15.6881	15.4834	16.4685	16.0507	15.937	13.6233	15.6886	16.0045	15.4505	16.2078	14.6053	15.3991	16.3025	15.8542	13.9124	14.7401	15.4897	13.7496	16.4066	15.5674	13.3425	13.6993	16.1177
POGLUT1	not-sig	not-sig	#N/A	#N/A	#N/A	#N/A	NA	13.6844	14.2137	13.1417	14.0666	14.6448	13.0836	13.2616	12.5291	11.731	13.9167	13.8819	13.9772	13.5649	13.009	13.8695	14.1555	13.6454	15.0329	13.4968	13.9654	14.0811	14.2607	13.1879	11.7543	13.8958	13.6851	12.5387	12.9665	12.9692	13.6497	12.2377	13.3419	14.8399	14.6158	12.8785	13.7315	11.2565	13.6246	13.0525	13.0761	11.4834	12.6752
MECP2	not-sig	not-sig	#N/A	#N/A	#N/A	#N/A	NA	14.5237	12.2552	12.6922	13.9253	13.8845	13.1655	14.7222	12.2516	12.8388	13.4625	12.8967	12.4418	13.1862	12.9636	12.2278	12.5818	12.2484	11.7359	14.2444	13.235	13.2743	13.0529	12.6414	12.6802	11.6689	11.5434	11.9804	13.5332	13.4832	13.9899	12.1237	14.5752	12.2243	13.7769	12.511	13.4003	12.8584	11.4669	14.0744	13.0335	14.4964	14.6717
PEX1	not-sig	not-sig	#N/A	#N/A	#N/A	#N/A	NA	13.0269	13.5879	13.7348	13.1551	14.1241	13.594	13.4908	12.6286	13.5108	12.8077	13.4345	12.9554	12.3962	13.1145	12.5106	12.7561	12.271	11.833	13.4838	13.6287	12.4924	12.2506	13.7604	13.0792	11.6305	13.4103	12.3061	13.2677	13.2038	13.3121	13.4115	12.602	11.7262	12.3336	12.9097	12.3049	12.7238	10.5846	13.0875	13.2913	12.6016	12.8525
FOCAD	not-sig	not-sig	#N/A	#N/A	#N/A	#N/A	NA	13.661	14.553	14.1593	13.988	13.9257	14.2266	14.5026	14.4346	14.1543	14.3471	14.4963	14.8793	13.8637	14.6087	13.6586	14.5222	14.7463	11.1653	14.5277	14.9141	13.8073	15.5845	14.7509	14.046	14.4524	12.6134	14.1135	14.2845	14.4494	14.7303	14.3633	13.8224	14.6366	14.1417	14.2397	13.9922	14.4534	13.9792	14.592	14.3891	14.1828	14.749
OCIAD2	not-sig	not-sig	#N/A	#N/A	#N/A	#N/A	NA	13.606	15.153	14.2592	14.57	14.9918	14.0784	16.216	14.1233	14.7432	13.3431	14.1307	14.3514	14.4829	14.7456	14.0327	14.6617	14.3804	15.3634	13.5728	14.347	14.6933	13.2785	14.6972	14.5281	14.239	14.1769	14.6202	14.2418	14.5555	14.4156	14.1093	14.6616	15.0212	14.4488	15.3836	15.0378	15.2491	15.0394	13.9627	15.1157	13.5399	13.658
FBLIM1	not-sig	not-sig	#N/A	#N/A	#N/A	#N/A	NA	12.4642	12.3019	13.019	12.5137	11.1449	11.8834	12.0364	13.3103	12.4612	11.9727	12.6761	12.7798	13.0265	12.8891	13.1955	12.8207	11.5963	10.7841	12.3304	12.599	12.519	13.1672	12.6858	12.4889	12.0959	11.6914	11.3369	12.7279	13.1721	12.9228	12.539	12.6852	14.8071	12.4251	12.3438	13.0018	12.8205	13.4879	12.455	13.4643	13.8577	13.2897
FAM98B	not-sig	not-sig	#N/A	#N/A	#N/A	#N/A	NA	13.4622	13.885	14.849	14.1967	14.9673	14.2997	17.5131	14.0397	13.5297	14.2817	13.3458	14.7799	13.8051	14.1996	13.5828	13.3143	13.6885	13.2938	13.7543	14.4579	13.9755	13.7893	13.6004	13.0642	15.0394	14.3162	13.5737	13.6738	14.5034	14.0372	14.6227	13.717	13.6155	14.0783	14.3445	14.736	14.6907	14.7225	13.7908	14.1127	14.3091	14.5298
ARAP1	not-sig	not-sig	#N/A	#N/A	#N/A	#N/A	NA	13.6876	14.0204	13.69	14.3473	14.5401	13.3736	14.1265	14.4292	14.3657	13.9218	13.5248	14.0442	14.4232	14.5652	13.5375	12.4582	14.3748	14.9668	13.9652	13.4094	13.5892	15.0807	13.542	13.468	14.1322	13.6004	12.9543	14.2642	13.1216	14.0427	14.0033	14.5186	13.4623	14.6346	13.1651	12.9627	14.0148	13.9774	14.2336	13.6875	14.5141	14.1802
CDC5L	not-sig	not-sig	#N/A	#N/A	#N/A	#N/A	NA	14.3693	14.7868	14.4531	14.0973	15.2605	14.5618	12.995	14.3117	14.4541	14.4279	14.57	14.2739	13.9532	13.9305	14.2548	13.982	14.6015	14.3851	14.6372	14.482	14.3178	14.2938	14.1932	13.949	14.3399	14.377	14.3812	14.307	14.4648	14.1673	14.8499	13.5635	15.0967	14.0664	14.3709	14.4563	13.8219	14.2514	13.611	14.25	13.8433	13.6927
GSTM2	not-sig	not-sig	#N/A	#N/A	#N/A	#N/A	NA	12.7171	11.9818	13.1776	12.2729	10.6442	12.7177	13.0188	13.3755	13.5798	13.4042	13.1033	12.3794	12.4091	12.8952	11.3739	12.6695	12.7992	13.4815	12.8188	12.9534	11.5599	11.2918	12.5084	11.6621	12.9478	9.58116	11.709	12.3197	12.0841	12.7636	11.5786	12.4307	13.1423	12.8372	11.9522	11.9396	12.4524	10.7313	12.342	12.2563	12.9508	12.7576
RAC2	4	IMMUNE	#N/A	#N/A	#N/A	#N/A	NA	12.0148	11.3205	12.2132	13.1524	13.9335	12.3124	13.7042	15.7622	12.8884	12.6965	12.4872	12.6109	11.5412	13.3574	12.9558	12.4566	12.4301	12.0472	14.6	12.772	12.22	14.3588	13.0729	13.3737	12.9358	10.1995	12.2866	13.7313	12.7697	11.6284	11.7771	14.1062	14.9051	14.273	13.1823	13.153	12.4448	14.0993	14.4956	11.9755	13.9926	14.3257
DENND2A	not-sig	not-sig	#N/A	#N/A	#N/A	#N/A	NA	16.9831	11.7219	17.3517	12.6885	17.0841	17.8995	17.7215	17.0632	17.2423	17.5601	17.3697	16.9245	17.8041	17.3085	17.6694	17.9389	16.9184	18.6674	17.6731	17.6208	16.949	16.5093	16.6822	15.267	18.0673	17.5261	14.8596	18.1686	17.4508	16.8526	15.2405	17.0894	17.3741	17.3667	17.4692	16.8376	17.5223	17.0397	16.9149	16.3623	15.139	17.0829
RHOA	not-sig	not-sig	#N/A	#N/A	#N/A	#N/A	NA	16.6206	16.2535	16.4413	16.4199	15.7661	16.1841	15.9577	16.869	16.5879	16.3931	16.0494	16.015	15.9895	16.4958	16.2983	16.7347	16.1847	14.7515	16.3009	16.226	16.8137	16.5863	16.3597	16.6363	16.0673	16.1765	16.5059	16.9254	16.6058	16.5984	16.6611	17.0186	16.658	16.6274	16.4031	16.4388	16.1213	16.6595	16.8116	16.4461	16.6471	16.6731
HNRNPDL	not-sig	not-sig	#N/A	#N/A	#N/A	#N/A	NA	16.9855	16.7404	16.3249	16.1937	17.0493	16.4526	16.727	16.2534	17.0593	16.5561	16.8434	16.8168	16.8471	16.1404	16.4937	16.3785	17.0419	17.2388	16.8254	16.7233	17.1563	16.8707	16.2112	16.7085	17.0418	16.5747	16.5867	16.4079	16.351	16.5186	17.0373	15.9131	16.6155	16.4545	16.6437	16.9128	16.6773	16.7694	16.6728	16.5219	16.5109	15.8804
NIBAN1	not-sig	not-sig	#N/A	#N/A	#N/A	#N/A	NA	12.7135	10.1413	12.3958	12.4111	13.0644	11.5573	12.8313	12.7227	12.5805	13.1858	12.0173	12.6236	13.4171	12.4256	12.7843	11.9808	12.6569	13.9367	12.5376	11.6717	11.7562	13.9548	11.6117	13.0436	12.7172	11.9308	10.9023	12.9354	12.4539	12.6211	12.4326	12.9737	12.3835	12.533	12.8314	11.8157	13.0257	13.3976	13.2607	11.102	14.0313	13.1622
GMPS	not-sig	not-sig	#N/A	#N/A	#N/A	#N/A	NA	13.6552	13.7494	14.3423	13.8667	13.7063	14.1317	16.6825	13.9263	14.1125	14.1444	14.1895	13.8404	13.6897	14.013	14.2898	14.2661	14.123	13.9648	14.5078	13.8042	14.4286	13.9503	13.9158	14.0924	14.2003	14.26	14.7225	14.2611	14.3274	13.9474	14.0168	13.8828	14.6836	14.5604	14.1944	13.8474	14.0227	14.1254	14.174	13.9588	13.8531	13.717
CD44	not-sig	not-sig	#N/A	#N/A	#N/A	#N/A	NA	16.6156	17.8232	17.5368	17.1218	16.3187	16.8993	17.1559	17.9182	16.9178	16.2351	17.0121	17.0567	17.1449	17.0618	17.1857	16.6376	16.6408	15.0475	17.043	16.5192	17.33	18.2694	17.1191	17.5771	16.9676	15.0283	15.722	17.36	17.4809	17.5563	16.9188	17.3567	16.8545	17.3666	17.0609	16.584	17.0167	16.9085	17.673	17.7368	18.0192	17.5014
ITIH2	4	IMMUNE	#N/A	#N/A	#N/A	#N/A	NA	14.0489	14.4282	13.0609	13.8531	14.558	12.7954	16.3208	14.3215	13.8421	13.2931	13.9121	13.7426	12.7507	14.1236	13.3858	12.8782	13.8995	14.6552	13.8173	13.5166	13.1265	14.8748	13.1508	14.4552	14.1963	13.8492	13.7604	14.1183	13.7683	14.214	13.3169	14.7571	15.575	13.6024	13.9632	14.5591	14.7757	14.4743	14.3035	13.5381	14.784	14.818
TSG101	not-sig	not-sig	#N/A	#N/A	#N/A	#N/A	NA	13.3583	13.8827	13.3268	13.0235	13.6686	13.0184	16.435	13.494	13.2223	14.0606	13.4201	13.501	13.3344	13.3995	13.2317	13.662	13.073	14.3862	13.7039	13.6229	13.187	13.614	13.4719	14.0847	13.5232	13.4465	13.4597	13.718	13.5814	12.7313	13.3664	13.8732	13.0089	13.8563	13.2427	13.9123	13.2317	13.8467	13.5097	13.5017	13.5512	13.5202
CLIP1	not-sig	not-sig	#N/A	#N/A	#N/A	#N/A	NA	13.535	12.8127	13.4758	13.3164	12.7436	11.9667	13.3246	12.9676	13.4951	13.3997	13.2753	13.7645	13.9629	13.492	13.4756	13.5219	13.4755	11.5884	13.9269	14.0247	13.5786	14.5124	13.7312	13.5382	12.6637	13.0313	12.2196	12.658	13.5869	13.9976	13.3385	13.1431	12.7642	13.6297	13.1543	13.5169	12.7056	13.5034	13.38	12.1956	13.9167	13.9893
PDS5A	not-sig	not-sig	#N/A	#N/A	#N/A	#N/A	NA	14.5862	13.8835	14.2149	14.2317	14.6925	14.4311	12.9262	14.0787	15.1492	14.7572	14.2959	15.0223	14.3319	14.5668	13.2643	14.152	15.1647	15.1125	14.4623	14.6128	13.9578	14.2514	14.6369	14.9085	15.0208	15.1374	13.7292	14.2485	14.5382	15.1504	14.5479	14.3632	14.8104	14.628	14.7465	15.1107	14.8211	15.0006	14.3674	14.1832	14.617	14.7405
TUBGCP3	not-sig	not-sig	#N/A	#N/A	#N/A	#N/A	NA	14.0177	13.7914	13.8507	14.1513	13.9916	13.8412	16.9041	13.5503	13.669	13.8764	13.8437	13.7566	14.2098	13.333	13.9236	13.6649	13.8634	14.5585	13.8152	13.4459	14.1458	15.1863	13.7945	13.727	13.9929	13.5846	13.7184	13.4659	13.7374	13.8274	13.8826	13.618	14.5337	14.1689	13.3797	13.4916	13.7346	14.6289	14.2319	13.8881	13.6804	13.8412
HPCAL1	not-sig	not-sig	#N/A	#N/A	#N/A	#N/A	NA	15.3384	14.6894	13.9736	13.6897	14.2698	13.7705	12.3858	14.3066	14.3401	14.0493	14.0549	14.4533	15.5235	14.1058	13.7402	14.5932	14.3092	15.3403	14.2362	14.4824	14.1372	13.7801	14.7299	14.6874	13.9951	15.2624	14.3401	14.2981	13.8286	13.7128	14.2858	14.4298	14.7191	14.3267	14.7504	15.9276	14.0311	14.5249	14.3889	14.2971	14.4695	14.2477
ITIH5	not-sig	not-sig	#N/A	#N/A	#N/A	#N/A	NA	13.135	12.2764	13.0921	13.795	10.7226	13.4618	12.9146	14.0853	13.393	13.0971	13.3009	13.3311	13.515	12.9336	13.5701	12.9502	13.8553	12.7819	13.8392	13.0071	13.5145	13.5576	12.741	13.0606	13.1166	11.7396	12.5619	11.5034	13.1159	14.018	13.1299	12.6162	12.3654	12.105	10.9818	10.6393	9.01969	11.6019	13.1963	13.2984	13.3747	13.8726
PTPRF	1	EMT	0.629033	0.0376822	1.54945	0.0222537	NA	18.2295	15.3828	17.8023	17.7369	17.6192	17.3186	13.3731	18.048	17.6822	16.9498	17.3584	14.8669	19.7426	15.7617	16.7004	16.9688	16.6836	17.286	17.4424	17.1032	17.0989	16.1789	16.4391	16.604	16.9229	16.4758	17.8121	17.3486	16.9009	16.3919	17.1522	18.8239	13.9361	14.8412	13.3568	17.2785	18.6317	14.1832	16.8704	17.7053	17.1755	19.4842
MBOAT7	not-sig	not-sig	#N/A	#N/A	#N/A	#N/A	NA	14.1455	13.685	13.5007	13.7755	14.5488	13.7774	13.282	14.1702	13.6989	13.6391	13.7074	14.4178	11.966	13.6729	14.8399	14.5203	13.3135	12.7009	13.6931	13.6413	13.0112	14.0081	14.3435	14.1777	13.7446	14.5823	14.0207	14.1979	14.279	12.819	14.7461	14.4328	14.586	14.6449	13.2495	14.8027	14.1012	14.0341	14.8823	15.3594	12.5826	14.632
TIMMDC1	not-sig	not-sig	#N/A	#N/A	#N/A	#N/A	NA	11.1428	12.918	12.4751	13.0697	12.9072	12.154	11.715	12.823	11.7029	11.8814	12.427	11.6893	11.7004	12.4884	11.105	11.9888	12.0375	10.8921	11.7353	12.1128	12.2187	12.2872	11.5431	11.5082	11.3568	10.3964	12.7129	12.243	11.8524	12.6694	11.6768	12.8449	12.8572	11.956	13.0641	12.0215	13.4644	11.3855	12.8028	10.528	12.5602	13.542
MYEF2	not-sig	not-sig	#N/A	#N/A	#N/A	#N/A	NA	12.2162	11.9177	13.2801	14.1583	14.6233	13.2538	17.717	12.6284	13.7548	14.0875	13.5804	13.2105	14.8447	13.1281	13.5118	13.8077	12.163	15.6038	13.5725	13.8153	13.7337	13.3236	13.3626	13.2211	14.3279	13.7677	13.1391	12.2009	12.4304	13.3589	13.5289	13.5785	12.1713	13.331	12.2538	12.2973	12.45	10.898	13.7383	12.6427	12.8058	13.5569
RABEP2	not-sig	not-sig	#N/A	#N/A	#N/A	#N/A	NA	13.3337	13.5272	12.8874	13.6719	12.6084	11.5814	12.2787	12.5049	13.1984	12.4073	13.8055	13.1352	12.1345	12.83	13.2446	13.1821	13.3856	11.7117	13.1945	13.3053	13.542	11.8077	13.8537	12.3009	13.0874	14.0939	12.3429	12.8019	12.9579	13.3464	13.1194	12.912	17.0694	12.0152	12.0702	12.8423	12.8493	11.1986	13.6245	13.1125	13.9568	13.6699
SERPING1	4	IMMUNE	#N/A	#N/A	#N/A	#N/A	YES	16.1704	17.2633	16.6321	16.6047	17.8712	16.0084	17.804	17.991	16.4887	16.2031	16.1339	16.4864	16.5315	16.268	16.0428	15.3354	16.4975	17.1652	16.5832	15.7525	16.0356	17.765	15.7012	16.7166	16.1488	16.8716	16.7847	16.4437	15.7432	16.633	15.6812	16.6657	15.8526	16.5622	16.1413	17.0277	17.1798	17.1656	16.206	16.1062	17.9533	17.8956
DYM	not-sig	not-sig	#N/A	#N/A	#N/A	#N/A	NA	14.4582	12.8788	14.197	14.8525	14.1028	14.1621	14.8274	14.0736	13.9525	13.9727	13.2556	13.6471	13.9049	13.5195	12.9546	14.1565	13.9239	12.881	12.5185	14.1331	14.3083	12.3629	13.5649	14.225	13.8137	13.6648	12.6135	13.6346	13.7699	13.7919	14.0064	14.6248	13.2353	14.0797	14.058	14.0262	13.7943	13.9678	14.1197	14.0098	14.2182	15.6997
PPP6C	not-sig	not-sig	#N/A	#N/A	#N/A	#N/A	NA	12.5272	12.7562	13.0307	12.5785	13.3422	12.8339	11.575	12.6203	13.39	12.8795	12.2886	12.5859	11.7672	12.604	12.9819	12.764	13.1116	12.4448	12.999	12.2645	12.9862	12.8835	13.379	13.1703	11.9999	13.3395	13.905	13.4826	13.2207	11.8069	13.1728	13.0085	14.354	13.3102	13.2091	13.0988	11.9726	13.0816	13.5305	12.5623	12.5229	10.9436
PRDM2	not-sig	not-sig	#N/A	#N/A	#N/A	#N/A	NA	15.0245	14.9473	13.9765	15.1814	16.1117	13.9094	17.3319	14.3718	14.7071	13.6341	14.7191	14.5377	12.0123	15.1263	14.7512	13.3711	16.7877	14.0815	13.9926	14.2212	15.5315	13.6986	16.7246	14.6228	13.6514	16.0896	16.4398	15.492	15.8877	16.5956	15.2052	14.8242	13.9386	16.3021	14.2988	16.6493	14.1503	14.085	16.5113	16.1189	14.5814	17.1098
LAMA5	not-sig	not-sig	#N/A	#N/A	#N/A	#N/A	NA	15.2703	13.3646	15.2566	14.7534	13.629	13.2418	13.7278	16.3322	13.6664	14.2526	14.5217	14.19	15.4532	14.1033	13.5407	13.4917	14.5491	15.0604	13.9433	13.6711	14.0142	14.8139	12.9057	13.6303	14.2197	13.5775	12.3386	12.7969	13.4207	15.0181	13.9553	14.5988	14.9008	12.8359	14.6432	13.8124	14.8613	13.6599	13.9341	14.1895	15.828	15.6049
NDUFS8	not-sig	not-sig	#N/A	#N/A	#N/A	#N/A	NA	13.9486	14.04	15.235	15.1959	14.4469	15.4224	13.1711	13.8704	14.2989	15.5575	13.9933	15.3227	14.7354	15.342	14.2761	14.2242	14.9839	15.1404	14.2921	15.824	14.3538	13.6427	15.0236	13.408	14.7163	14.2433	14.6383	14.865	14.6097	14.9917	14.4037	14.2402	14.431	14.43	14.7023	13.7558	15.0468	14.3164	14.1418	14.2378	14.7495	13.27
SGSH	not-sig	not-sig	#N/A	#N/A	#N/A	#N/A	NA	14.2555	14.4857	14.1659	14.5335	14.7554	14.4421	10.4241	14.0773	14.9642	15.2605	14.0184	14.4085	14.2762	14.6006	14.6077	14.8767	14.2351	12.455	14.5708	14.3646	14.66	14.7017	14.1863	15.31	14.4337	14.548	14.7826	14.4651	14.6233	14.6024	14.5102	14.5426	13.2239	13.6045	13.1437	15.0854	13.5192	12.7001	14.3865	13.9188	14.7892	14.1598
HIP1	not-sig	not-sig	#N/A	#N/A	#N/A	#N/A	NA	15.3822	13.7421	13.8061	14.7245	16.2418	15.1125	11.9803	11.7543	14.3548	13.4688	13.635	13.8325	16.5245	15.3963	15.6017	13.2557	14.589	12.7685	14.5521	14.2692	15.5721	14.4385	12.4013	13.4283	13.9914	11.7445	14.25	13.4508	13.8487	13.8367	14.8691	13.6861	12.217	12.8133	13.0533	13.4681	13.5996	15.2329	14.0869	15.9251	10.969	13.2998
IDI1	not-sig	not-sig	#N/A	#N/A	#N/A	#N/A	NA	15.3815	14.7487	14.6896	15.0283	14.9776	14.7633	12.1519	14.262	15.0572	15.3329	14.5684	14.7515	15.4489	14.6072	15.521	15.007	14.3237	16.368	15.0619	14.6546	14.6331	15.1622	14.8288	14.442	15.3211	15.7561	15.895	14.5963	15.3284	14.693	15.3571	14.8737	15.431	14.7189	14.8517	15.7461	14.7788	15.0817	15.0719	14.4239	14.2421	14.6131
LAMTOR3	not-sig	not-sig	#N/A	#N/A	#N/A	#N/A	NA	13.2392	14.7455	12.9204	13.1451	14.6402	13.4727	12.7205	14.401	13.9693	13.5439	13.8215	13.9619	14.1788	13.5741	13.6269	13.0933	13.376	14.1877	13.2821	13.7902	13.8558	13.8104	14.0191	13.6736	13.74	12.4827	15.3624	13.5671	13.2872	13.0492	13.626	14.0138	16.3742	13.3635	13.4624	13.8032	14.2837	14.9458	13.7264	14.0082	14.199	13.2742
SPTBN2	not-sig	not-sig	#N/A	#N/A	#N/A	#N/A	NA	13.494	14.3583	13.7316	13.9961	13.7754	14.0275	16.974	14.2032	14.0427	14.0459	14.6741	14.0703	14.4599	14.0589	14.336	14.2483	14.0944	14.6525	14.0964	13.8808	14.2605	14.0235	13.6998	14.7539	14.5394	13.8448	14.6887	13.8708	14.081	14.2837	13.8397	14.3815	14.8356	14.0204	13.4228	13.813	14.0841	14.2092	13.681	14.4326	13.7543	14.2656
HBB	not-sig	not-sig	#N/A	#N/A	#N/A	#N/A	NA	20.0144	20.7006	20.7847	22.0147	20.5772	20.2182	22.5048	20.6597	21.5142	18.5703	20.3998	20.8218	19.6015	21.5317	19.6077	21.2424	21.0168	18.6252	21.0566	20.4219	20.5214	20.646	20.1494	21.4728	20.9606	20.6087	21.3996	20.9136	20.2283	21.7523	21.4108	21.3019	21.1241	21.5594	20.7076	20.8873	21.2816	21.5845	21.8109	20.5131	23.1769	23.1099
RPN2	not-sig	not-sig	#N/A	#N/A	#N/A	#N/A	NA	16.0684	16.2969	16.3585	15.7806	15.9237	15.7716	17.1462	15.9432	16.1566	16.6796	16.3263	16.3479	17.0476	16.4916	15.9209	16.1799	16.6589	17.3715	15.8314	16.0945	16.2358	16.1816	16.5821	16.3554	17.0007	16.6937	16.089	16.3168	16.2419	16.245	16.664	16.5121	16.87	16.5714	16.4858	16.614	16.7738	16.2747	16.5659	16.8495	16.5317	16.8687
RRS1	not-sig	not-sig	#N/A	#N/A	#N/A	#N/A	NA	12.8768	13.5823	13.6561	13.0275	12.9816	14.6446	18.4811	12.9623	13.43	14.0388	13.0013	12.8228	12.6545	13.0146	13.0006	13.3864	12.7812	14.5248	13.4996	13.7781	13.3967	12.174	12.7601	13.0419	14.21	13.1367	12.7367	13.8706	13.7644	12.8108	13.2741	12.2398	14.7546	13.2212	13.8898	12.4019	13.269	12.8402	12.2246	12.0084	13.371	12.8472
PNKD	not-sig	not-sig	#N/A	#N/A	#N/A	#N/A	NA	13.6636	11.6315	12.6219	14.1293	11.047	12.4913	12.9566	11.651	12.0629	12.4857	11.8707	13.6466	11.5549	11.6616	13.4603	12.4938	13.221	11.9337	12.9456	13.2785	11.4464	12.9528	13.4225	13.1655	11.8497	14.0742	12.5091	12.396	13.0141	12.9367	13.4173	11.7028	12.3315	11.4771	13.0786	11.3218	12.2071	12.6546	12.9184	13.4176	11.0916	11.1052
UBQLN4	not-sig	not-sig	#N/A	#N/A	#N/A	#N/A	NA	14.4039	14.5334	14.0367	13.802	14.0213	14.1576	12.5717	13.4103	14.0849	14.4633	14.5709	14.1407	14.8011	13.6003	14.3392	13.968	14.3948	12.6316	14.603	14.5981	13.8131	14.2801	14.2836	14.4543	14.1867	14.4551	14.8622	14.0061	14.1415	13.9322	13.9527	13.8673	14.7995	14.4797	14.7133	14.4623	14.1006	14.2031	14.159	13.8991	14.6453	13.284
U2SURP	not-sig	not-sig	#N/A	#N/A	#N/A	#N/A	NA	15.1217	15.067	14.9049	15.3619	15.4778	15.3202	16.9797	15.1447	15.3373	15.4868	15.0553	15.2214	15.1925	15.3828	15.406	15.4852	15.2351	14.9147	15.49	14.9681	15.1235	15.7942	15.2299	15.4121	15.2469	15.3486	15.1549	15.5818	15.2773	15.3605	15.4815	14.799	15.5943	15.053	15.2192	14.6203	14.5338	15.2477	15.6814	15.3286	15.8647	15.1634
RFC4	not-sig	not-sig	#N/A	#N/A	#N/A	#N/A	NA	12.9526	13.3917	14.1281	13.8354	14.5694	13.8434	12.4733	13.3483	13.6827	14.0076	14.0302	13.4612	13.785	13.098	14.8057	12.9334	13.4011	14.5046	13.7627	13.3653	13.7293	13.917	13.2264	13.7067	14.3452	13.816	14.2043	13.2327	13.9683	13.0105	13.5008	12.737	15.2368	13.802	13.1219	14.7765	13.6571	14.6111	13.402	12.7941	13.1666	12.3178
SLC12A7	not-sig	not-sig	#N/A	#N/A	#N/A	#N/A	NA	14.3176	14.7438	14.2263	14.1829	14.4857	14.4595	13.4807	15.0501	14.5852	13.9076	14.434	14.3698	14.6477	13.8569	14.9463	14.9438	14.0666	13.7666	14.6752	14.2987	14.1005	13.6931	14.6212	14.5077	13.688	13.7428	12.7795	14.7558	14.3124	14.2678	13.9676	14.5625	13.2959	14.4323	14.8973	14.0152	13.5315	15.2426	14.3837	14.1385	13.3877	14.4053
TMEM126A	not-sig	not-sig	#N/A	#N/A	#N/A	#N/A	NA	11.8498	13.4754	12.5657	12.7108	13.0659	12.5307	10.4494	12.0054	12.9661	16.3757	12.7645	13.418	13.1451	12.4845	11.2024	12.6239	11.8667	15.1157	12.9114	13.3473	12.6363	11.9996	13.156	12.3456	12.9212	13.3288	12.7191	12.6188	12.5713	13.7925	13.4536	11.5981	13.2017	11.968	13.7294	11.5816	13.5831	12.3435	12.4664	12.9209	12.6483	12.0083
STK38L	not-sig	not-sig	#N/A	#N/A	#N/A	#N/A	NA	14.4841	13.5694	14.0426	13.9582	13.9019	13.75	14.2227	13.3257	14.083	13.9319	13.7757	14.0694	14.1015	13.7161	13.0707	13.4573	13.5321	15.662	13.7297	13.9863	13.0738	14.0392	13.5008	13.7707	13.9373	14.2446	14.1912	13.2023	13.2001	14.1833	14.0255	12.8478	14.8069	13.7711	13.7414	13.6381	13.2615	13.5268	13.605	14.0098	14.46	13.8256
FAH	not-sig	not-sig	#N/A	#N/A	#N/A	#N/A	NA	13.1099	13.6185	13.857	13.8032	12.286	13.0402	16.5986	14.0311	13.0584	12.8399	13.3306	13.1994	13.238	12.886	13.0474	13.2514	12.8386	13.7269	11.661	12.5112	12.8067	13.0968	12.0839	12.5519	13.387	13.4783	13.1231	13.3822	12.5468	12.8015	13.1794	12.2533	13.8935	13.3631	13.3703	11.2705	13.5786	12.3926	12.2741	12.5999	13.1182	12.4293
HSD17B2	not-sig	not-sig	#N/A	#N/A	#N/A	#N/A	NA	12.4174	13.4824	13.927	13.538	11.0121	12.7941	12.1055	10.6718	13.0564	12.8966	13.0277	12.6647	14.031	14.0351	14.5891	14.0156	13.1436	12.4592	13.8318	13.901	12.6594	15.366	14.3579	12.8303	13.6648	13.0311	12.9571	12.329	12.8629	13.2177	12.4323	14.8304	12.7801	13.8372	13.2107	13.0737	13.4319	13.9504	13.5584	13.6003	14.1036	13.8857
SNTB2	not-sig	not-sig	#N/A	#N/A	#N/A	#N/A	NA	14.6843	14.6946	15.3995	15.4581	14.6322	14.8785	16.3671	15.314	14.8241	15.8373	15.4737	15.4368	15.7499	15.2254	14.5924	14.7234	14.2166	16.4083	15.5882	15.2071	14.945	15.158	15.0168	14.7409	14.8864	15.0975	14.5846	15.1167	14.8109	14.9641	14.5503	15.2693	12.868	14.5894	14.8804	15.1573	14.7557	14.3561	14.6082	15.2879	15.8553	15.6726
SEC14L2	not-sig	not-sig	#N/A	#N/A	#N/A	#N/A	NA	11.8993	11.5517	12.7255	11.5839	11.3642	12.4131	11.4354	13.5966	13.4122	12.2659	11.944	13.9385	13.8543	11.3276	13.0629	11.2224	12.5276	13.9481	12.2131	11.4366	10.8878	12.6965	12.4277	13.5601	10.6265	11.9803	11.9881	12.4181	13.2574	13.3948	13.5407	12.0527	12.5557	12.5958	12.0412	11.7426	11.6627	12.7488	12.6251	11.0333	11.3593	13.3947
THUMPD1	not-sig	not-sig	#N/A	#N/A	#N/A	#N/A	NA	14.3362	14.3605	14.6273	13.9699	13.0649	14.251	12.7396	13.6703	14.2083	14.4338	14.6079	14.0909	14.1581	14.1148	15.23	14.2166	14.8076	14.025	14.4896	14.6913	14.5394	14.6185	14.1637	14.13	14.2413	14.6025	13.8035	14.0611	13.8548	14.0226	14.5611	13.9486	14.4703	14.1793	14.6564	14.0077	14.2721	13.8294	13.9246	13.9531	13.6939	13.9782
ROCK2	not-sig	not-sig	#N/A	#N/A	#N/A	#N/A	NA	15.6256	15.5789	15.5322	15.3915	14.2518	15.4702	13.0795	15.5007	15.235	15.2497	15.5782	15.265	15.6113	15.3035	15.3728	15.3539	15.4484	15.168	15.0505	15.3249	15.9014	15.159	15.2613	15.4485	15.6176	15.9111	15.3501	15.2483	15.4063	15.3926	15.7158	15.6527	14.7187	15.3765	15.5231	15.0181	15.3989	15.3532	15.3438	15.4718	15.3916	15.542
G3BP2	not-sig	not-sig	#N/A	#N/A	#N/A	#N/A	NA	12.6251	13.0337	12.2407	12.6537	12.8631	12.48	16.3122	12.7311	11.9444	12.9073	12.4817	12.6272	13.4639	11.7938	12.1806	11.6608	12.1621	14.2338	12.9923	12.1348	12.0007	13.2579	12.1505	12.4004	12.7622	12.079	13.1677	12.3257	11.8679	12.8074	12.9227	12.6379	12.3999	12.3464	11.6103	12.8429	12.941	13.4454	12.6841	12.8911	12.7637	11.9487
ACAT2	not-sig	not-sig	#N/A	#N/A	#N/A	#N/A	NA	13.2645	13.0309	13.986	12.7613	13.221	13.2813	14.0547	13.9068	13.7553	13.6183	13.496	12.9162	14.8605	13.1214	14.3583	13.8751	12.9742	15.6446	13.3297	13.9179	13.4098	12.5701	12.9981	13.2849	14.0434	14.1654	13.4842	13.9611	14.0321	13.1956	14.0808	14.1534	15.5634	14.2586	13.3329	14.5804	13.2774	14.1049	12.8018	13.3142	12.9373	13.6185
BAZ2A	not-sig	not-sig	#N/A	#N/A	#N/A	#N/A	NA	11.1487	9.96895	14.2869	11.3985	16.0819	11.5824	14.8301	11.5747	13.5072	11.8806	13.0333	13.6448	13.1535	10.4087	11.4976	12.2206	14.7001	12.301	10.3911	13.4566	12.1155	10.5044	13.9243	10.3592	11.7928	13.3708	15.7352	11.3709	11.7238	15.4312	11.4607	13.0507	13.7085	13.1708	11.8969	13.126	10.5451	13.951	12.6454	12.5888	11.4684	14.2701
TMCO1	not-sig	not-sig	#N/A	#N/A	#N/A	#N/A	NA	15.6147	13.8444	15.6371	13.9808	14.8682	14.5108	13.7613	14.7566	14.7425	14.9519	14.7762	15.1058	13.8405	14.8921	14.182	15.1298	16.0929	13.2374	15.7678	14.9655	15.1133	14.0109	14.4907	15.0344	14.2896	15.6139	15.31	14.918	15.0181	15.4119	14.709	14.7433	14.1062	13.711	14.742	14.2407	14.5155	14.2726	14.8409	15.0135	14.4736	15.0493
TPRG1L	not-sig	not-sig	#N/A	#N/A	#N/A	#N/A	NA	13.0172	12.808	12.6076	12.119	11.8805	11.1162	11.8801	11.4555	12.3657	12.1348	12.3365	12.7154	14.1745	10.8519	12.6869	12.7023	12.6207	11.5471	12.6771	11.4932	11.6914	13.246	10.5396	11.2377	12.9385	12.0829	11.8389	12.4363	12.5272	10.2001	10.3685	11.9418	13.5815	11.5065	12.6395	11.1465	11.4098	13.0506	12.6638	11.1874	10.7696	11.9797
BCL2L13	not-sig	not-sig	#N/A	#N/A	#N/A	#N/A	NA	14.9475	14.6456	14.3219	14.1526	14.3624	13.8287	12.4859	12.982	13.5632	13.658	14.535	12.8975	13.5189	13.372	13.8985	13.3093	13.3811	13.7788	11.9714	12.9576	13.002	13.6394	14.1717	12.6066	14.1438	13.906	14.6199	12.7413	12.7975	14.4868	13.9273	14.1378	12.4738	12.6785	14.2018	13.277	14.8117	12.9362	12.8979	14.983	14.3518	13.1811
C5	4	IMMUNE	#N/A	#N/A	#N/A	#N/A	NA	13.7218	14.3564	14.2751	14.57	15.0317	13.4472	18.2589	16.0254	14.4577	13.6032	13.1656	13.5151	13.8464	14.302	13.8019	12.7928	13.5004	14.5393	13.5567	12.9384	13.4758	15.5291	13.7563	14.6039	13.7257	14.0834	13.6272	13.9858	13.4395	13.79	13.5934	14.4577	12.721	14.0077	13.8486	14.1481	14.4995	14.5451	15.3558	13.3282	15.0929	15.1923
SLC4A1	not-sig	not-sig	#N/A	#N/A	#N/A	#N/A	NA	14.4263	16.5845	16.169	17.5345	16.2848	15.1288	13.5387	16.1204	17.2608	15.4844	15.7202	15.9267	15.8438	17.0317	14.6327	16.4871	16.343	15.0778	16.0343	15.1955	15.4536	15.6064	14.8612	16.7251	16.9946	15.3245	15.8595	15.9381	15.3783	16.4048	16.2504	16.6186	16.5178	17.1973	14.7166	15.9917	17.0805	17.2028	17.2005	15.2834	18.9309	18.5959
DHRS9	1	EMT	0.6298	0.0197704	1.69947	0.0258805	NA	17.8783	14.575	18.3399	17.1311	17.1032	17.1854	12.8934	17.7081	17.4077	15.8856	15.2293	16.9545	17.545	16.3243	17.008	16.1241	16.421	14.8735	17.2889	16.571	18.069	18.8089	16.3031	18.0434	17.4483	17.3439	16.6544	18.3905	17.0182	18.1826	17.6829	18.2641	14.7461	16.7776	18.0091	17.5079	18.5409	16.5491	16.5414	16.7017	17.3051	17.5927
NPNT	not-sig	not-sig	#N/A	#N/A	#N/A	#N/A	NA	12.0111	12.374	12.4854	11.807	12.3531	12.2602	11.6537	12.2475	12.3235	11.2107	9.28512	2.49253	11.4744	7.11741	11.9459	11.7677	10.8243	11.6421	11.3304	12.0088	12.2663	7.53438	11.195	7.22978	11.0253	11.5825	11.9511	12.1137	12.0717	12.2371	10.9178	12.2279	11.5793	11.3927	11.3419	11.5226	10.4912	12.0625	12.6002	12.8364	12.6634	12.6782
SAAL1	not-sig	not-sig	#N/A	#N/A	#N/A	#N/A	NA	12.5073	14.5122	13.7009	13.248	13.4929	13.408	13.8586	13.3603	12.9696	13.2396	12.62	13.2683	13.4063	15.0338	13.2691	12.6193	14.1363	15.0422	13.1874	12.778	13.7702	15.4603	13.0496	13.7076	13.9287	13.6407	13.0338	13.5249	12.9423	12.9341	12.813	13.3131	12.4701	13.7723	12.9078	13.7494	14.0373	14.9869	13.9312	12.3322	14.7326	13.2404
THNSL1	not-sig	not-sig	#N/A	#N/A	#N/A	#N/A	NA	13.6629	13.1415	12.8749	13.5868	13.5198	13.7613	11.2744	12.8676	12.8959	12.8087	12.7278	13.009	13.3301	12.5498	13.0153	13.2813	11.4341	11.0155	12.0988	13.0563	13.0781	13.4772	13.2921	13.6506	12.1414	13.2667	12.564	12.4357	13.3404	13.6886	13.3991	12.9411	14.1929	12.2807	14.7338	12.098	12.3089	10.8148	12.6062	12.4973	12.2402	12.9077
SLC25A4	not-sig	not-sig	#N/A	#N/A	#N/A	#N/A	NA	15.054	15.4862	15.0758	15.7338	15.6281	15.3975	17.4218	15.7554	15.6972	14.9672	15.2513	15.5323	15.7819	15.0375	15.3933	15.5629	15.0477	15.006	14.8444	14.9828	15.0777	15.0708	15.0519	15.2433	15.3959	14.7328	15.8001	14.6311	15.3252	15.44	15.5967	15.4227	16.862	15.2539	15.1674	14.7165	14.853	15.1237	15.0438	15.4495	15.6073	15.412
NSUN2	not-sig	not-sig	#N/A	#N/A	#N/A	#N/A	NA	15.7511	15.286	15.3479	15.6527	15.5235	15.5478	13.6809	15.2485	15.5439	15.4911	15.6552	15.0538	16.4021	15.1884	16.5506	15.5772	15.7416	15.3282	15.383	15.1161	15.7443	15.1577	15.1296	15.0713	15.2008	14.5453	14.9831	15.3023	15.3654	14.9934	15.3355	14.8911	15.9912	15.3541	15.5727	15.5849	15.4227	16.101	15.1292	15.5398	14.6721	12.8971
SRP54	not-sig	not-sig	#N/A	#N/A	#N/A	#N/A	NA	14.1205	13.9138	13.8643	14.4408	14.3504	13.7942	12.2545	13.9815	14.0238	14.399	14.3169	13.8029	13.7343	13.8245	13.8021	13.304	13.8924	15.0833	13.5487	14.0316	14.2922	13.8482	14.1751	14.0565	14.0846	13.9601	14.2328	14.0332	14.2987	14.3471	14.3269	14.1804	14.4977	13.9938	14.3572	14.471	14.4365	14.2822	14.4492	14.084	13.843	14.5425
MYO1A	not-sig	not-sig	#N/A	#N/A	#N/A	#N/A	NA	13.1595	13.5763	14.3892	13.3203	13.2034	14.9145	17.5668	14.0611	13.2166	14.5995	12.9926	14.6096	13.578	14.5432	13.1971	15.4722	13.2417	14.3297	13.011	14.3337	13.4357	16.0774	14.8413	13.2706	13.9284	13.4295	13.8998	13.7076	14.8308	14.8561	13.2337	14.2271	13.7529	13.8887	13.9883	12.4227	13.9267	12.5031	13.6439	14.7551	13.7228	13.78
NAXD	not-sig	not-sig	#N/A	#N/A	#N/A	#N/A	NA	12.6201	14.3167	11.6928	13.8393	12.5388	12.9209	11.8477	11.465	12.837	13.6386	13.202	11.734	13.4388	12.0708	13.8038	12.5305	13.2153	11.9036	11.7512	12.0478	13.9331	14.0559	13.2863	13.3746	13.2527	13.2997	13.4946	12.7087	13.7193	12.6296	13.7382	13.6175	14.5736	12.5922	12.3736	12.3675	10.4957	12.9401	13.0653	13.4195	12.1214	12.1078
PSMD1	not-sig	not-sig	#N/A	#N/A	#N/A	#N/A	NA	15.1932	14.9988	15.1599	14.9594	13.6791	14.3101	15.8716	14.9861	15.0692	14.507	15.0398	14.6572	14.9818	14.5945	15.2033	14.9425	15.0739	14.9529	14.2088	14.5387	15.1241	15.0212	14.4642	15.2692	15.3328	15.1843	14.7428	14.9857	15.0513	14.6339	14.9594	14.2169	14.9042	15.1042	15.4784	15.3591	15.287	14.3284	14.7912	14.548	14.3972	14.4447
NUB1	not-sig	not-sig	#N/A	#N/A	#N/A	#N/A	NA	14.4965	14.4543	14.3464	14.4073	14.1773	14.6954	13.0302	13.7295	14.1347	14.4311	14.3526	14.4561	14.3039	14.3891	14.5514	13.8423	13.9274	15.1458	13.7815	14.8992	14.4933	12.3831	13.9009	14.1593	12.7954	14.1628	13.4568	14.427	14.1716	14.0229	14.5485	14.5645	12.9137	14.8516	14.5607	14.6237	14.0998	14.4526	13.9583	14.0062	12.7623	12.5323
LYPLA2	2	METAB	#N/A	#N/A	#N/A	#N/A	NA	12.1996	10.7964	11.4528	10.5647	12.5673	9.49282	10.0108	10.5502	9.21101	12.0683	11.3926	10.1739	12.4277	11.1108	10.4014	11.4946	10.7957	11.5109	11.0301	9.58239	9.07936	10.6395	12.0404	10.5878	12.124	10.2981	13.6226	10.8908	9.64116	11.8064	10.3023	10.7375	11.9627	12.6923	12.5922	11.6267	11.6494	11.664	10.8857	9.23196	12.2659	11.2047
UBA7	not-sig	not-sig	#N/A	#N/A	#N/A	#N/A	NA	11.5677	15.213	13.4266	14.9672	12.6493	14.2264	11.5074	14.3433	14.3648	14.5401	14.8418	15.3034	13.771	14.7843	15.2347	14.682	15.2857	13.6798	14.4545	13.8079	12.579	13.6727	15.2194	13.8447	13.3214	13.4645	14.4603	15.1638	14.6533	14.3397	13.3712	14.8786	15.8879	15.0336	14.2315	14.1741	14.416	15.6399	14.6752	14.5311	14.3585	15.3506
VRK2	not-sig	not-sig	#N/A	#N/A	#N/A	#N/A	NA	14.1176	13.8919	13.2043	13.5302	14.1016	14.1391	12.7387	13.4508	13.5383	13.9147	13.9902	14.0268	13.7185	14.5212	14.0961	14.0281	13.6786	13.9919	13.447	13.4602	14.0462	12.0122	13.5202	13.5977	14.6856	13.6002	12.6236	13.706	13.5638	13.7467	13.6854	14.0884	13.4778	11.6342	13.6014	13.3394	13.3262	14.5917	13.9175	14.8572	14.7425	13.4229
ELANE	4	IMMUNE	#N/A	#N/A	#N/A	#N/A	NA	12.8899	13.6186	14.8865	14.5641	17.7202	15.8877	17.3166	17.7455	15.4539	14.3345	13.7306	14.847	13.8469	15.3931	15.1322	14.2818	15.4936	15.8443	15.2881	13.5139	14.4401	17.4502	14.281	15.3363	14.9517	11.66	14.9673	13.6053	15.397	15.2854	15.0014	14.6987	12.2245	16.4364	14.6415	16.4302	15.4454	17.2389	16.0397	13.7328	15.9661	16.0972
HRG	4	IMMUNE	#N/A	#N/A	#N/A	#N/A	NA	14.2442	16.0408	14.5312	15.9207	15.8055	14.276	16.5604	15.5507	15.1029	14.7408	14.7852	14.8616	14.2441	14.9658	14.6241	13.2262	14.5558	15.6965	14.7344	14.3282	14.8221	16.5602	14.3114	15.0556	14.6811	14.1733	14.4534	14.2125	14.1987	14.6695	14.4043	14.2419	14.2178	15.3858	13.4447	15.5809	15.028	15.5385	15.3592	15.9722	15.6903	15.2594
EIF2S3	not-sig	not-sig	#N/A	#N/A	#N/A	#N/A	NA	14.9459	15.2842	15.3343	15.0291	15.0208	14.9977	15.4472	15.2285	15.5315	15.417	15.4966	14.9399	14.8966	15.0907	15.2024	14.74	15.4835	16.1539	15.1716	14.8994	15.4314	15.2086	15.0836	15.0636	15.4578	15.3457	15.5095	15.6001	15.329	15.4533	15.3676	15.0182	16.4547	15.4976	14.9255	14.8844	15.2719	15.3168	15.3183	15.2739	15.1836	15.275
DOCK9	not-sig	not-sig	#N/A	#N/A	#N/A	#N/A	NA	14.4433	12.6202	13.4705	14.0773	14.6828	13.2323	13.2092	13.0446	12.6865	12.1914	13.6631	12.7718	13.959	13.411	13.2155	14.0137	13.2297	10.5625	13.5951	13.2551	13.7721	11.8782	13.8027	13.2853	13.2248	13.6355	12.9747	13.4492	13.4653	12.8994	13.0366	12.8204	14.5842	13.9301	13.8412	12.9446	13.8172	13.6349	12.9653	13.891	13.8797	14.1499
HARS2	not-sig	not-sig	#N/A	#N/A	#N/A	#N/A	NA	15.1498	14.3467	14.3594	14.6057	15.2204	14.515	12.4386	13.9672	14.6731	14.6877	14.7064	14.6458	13.5437	14.6107	15.2122	14.8497	14.5884	12.086	14.3011	15.0002	14.8001	14.7186	14.4873	14.6687	14.4547	14.6118	14.7751	14.8301	14.7416	15.1807	14.8131	14.752	14.1669	14.7568	14.6888	14.3738	14.8986	13.8998	14.5923	14.8227	14.8141	14.5927
ATP13A3	not-sig	not-sig	#N/A	#N/A	#N/A	#N/A	NA	11.0985	12.5683	12.6767	12.5928	12.4545	13.0864	14.2593	13.3263	13.2162	12.2704	9.59707	13.524	12.0001	12.626	12.6722	12.8921	13.1332	12.6407	12.6321	12.3683	13.2252	11.9752	13.2338	13.1517	12.5826	12.6718	13.7698	12.239	12.0594	13.5246	13.4606	13.0201	12.9812	12.7212	12.7355	12.1481	12.5666	12.521	12.6063	13.1137	12.5391	4.49972
ACTL6A	not-sig	not-sig	#N/A	#N/A	#N/A	#N/A	NA	13.4989	14.0308	14.0365	13.5072	13.9079	14.5492	16.3085	14.3029	14.3249	14.2499	13.5436	13.6547	14.3916	14.0599	13.703	14.4859	14.1137	14.3975	14.3475	13.9564	14.0249	14.01	13.8794	13.637	14.265	14.228	14.4238	13.8451	13.5639	13.1035	13.6758	13.6294	12.4653	14.0017	13.9463	14.4571	13.8817	14.3014	13.767	13.609	13.2557	13.3654
PHB2	not-sig	not-sig	#N/A	#N/A	#N/A	#N/A	NA	17.2559	17.8728	17.7441	17.8232	18.1989	17.6524	16.4254	17.6109	17.767	17.8719	17.7929	17.8222	17.6291	17.1428	18.0458	17.58	16.8583	16.8166	17.3173	17.6418	17.399	16.9172	17.8641	16.9941	17.5114	17.6461	17.9681	17.2182	17.6606	17.7204	17.5805	17.9618	17.3459	16.9306	18.126	17.1117	17.1627	17.02	16.9872	18.1287	16.1561	16.3016
SPAG9	not-sig	not-sig	#N/A	#N/A	#N/A	#N/A	NA	13.9579	14.0253	14.3449	13.89	13.5658	14.3493	16.2337	14.6035	14.6563	13.6987	14.1196	14.6083	14.4374	14.5294	13.5561	14.2284	14.4762	15.1451	13.5322	14.4351	15.0066	14.5629	14.5993	13.4112	14.4339	14.3204	13.8027	13.9765	14.5998	14.4222	14.9024	14.5848	14.0445	13.9105	14.1313	14.116	14.0349	14.247	13.7812	14.1422	13.7708	14.4719
EEA1	not-sig	not-sig	#N/A	#N/A	#N/A	#N/A	NA	14.037	14.5751	15.9455	14.8853	14.0364	14.8237	16.7043	14.1476	15.0933	14.235	14.6667	14.8282	13.8513	14.4117	14.2205	14.4812	14.1706	15.0896	14.9273	14.6992	15.0344	14.3904	14.9712	14.4335	14.248	15.3315	14.3925	14.4973	14.5456	14.8459	15.1975	14.1211	14.8369	14.5378	15.7131	14.2098	14.1156	14.1084	14.7452	14.2796	14.3713	14.4264
CORO2A	not-sig	not-sig	#N/A	#N/A	#N/A	#N/A	NA	13.9523	13.4232	13.2457	13.7359	14.3304	14.2379	11.845	13.3567	13.9129	14.1178	12.8346	11.7642	15.4417	14.4483	15.1895	14.638	14.6701	11.8513	13.2432	14.3075	12.0026	12.6706	15.603	12.0122	12.3088	14.7963	16.0491	13.3192	14.5041	12.3876	13.0414	14.1845	16.5763	14.1508	14.1581	13.3077	13.047	11.0358	14.2133	13.5332	12.8123	16.1156
IGKV1D-33	not-sig	not-sig	#N/A	#N/A	#N/A	#N/A	NA	17.2321	13.3787	13.09	13.259	13.4223	11.9146	13.6939	14.371	13.0524	12.9429	13.0649	13.1616	13.5535	13.9724	13.4308	12.421	12.1971	13.4085	13.4156	12.4099	12.0941	13.3791	13.0438	13.5137	12.4469	12.3262	12.2461	12.796	13.2406	12.8828	13.0193	15.8625	13.5978	13.4124	13.301	13.8296	13.8805	14.9613	13.6912	13.1407	14.5869	15.1798
SLC30A1	not-sig	not-sig	#N/A	#N/A	#N/A	#N/A	NA	13.4982	12.9577	13.6338	13.7142	12.361	13.0935	13.6005	12.9471	14.0969	13.8744	13.6739	13.3298	12.5936	12.4765	13.4593	13.7859	13.951	13.0146	13.6516	13.7316	13.6153	12.8285	13.5045	12.7173	12.3943	12.2826	13.5996	13.9366	13.8629	14.3349	13.0908	13.7991	13.5484	14.1311	14.9004	14.1469	13.6615	13.1519	13.8468	15.0568	13.9113	11.55
C6	4	IMMUNE	#N/A	#N/A	#N/A	#N/A	NA	12.8931	13.2566	14.0012	13.8476	15.1161	13.4291	13.6451	15.962	13.2898	13.1149	13.3629	13.1817	13.4874	13.6413	13.3582	13.1983	12.8193	14.7127	14.0313	12.3641	13.0289	14.9014	13.2007	13.3702	12.9166	12.9981	10.8838	13.4342	12.5706	13.5113	11.5385	13.4964	11.9794	14.321	12.0981	14.1429	13.5417	14.1363	14.7789	13.3527	15.0948	14.196
RARS1	not-sig	not-sig	#N/A	#N/A	#N/A	#N/A	NA	16.6243	16.3072	16.5579	15.8006	15.8925	16.3846	16.2689	16.0347	16.2331	16.8773	16.2537	16.1762	16.4804	16.2291	16.7786	16.7115	16.4348	17.1578	16.3427	15.8867	16.4325	16.3812	16.2126	16.2052	16.2115	16.401	15.7573	16.2798	16.2087	16.2215	16.012	16.2169	15.8639	15.9186	16.0976	15.9772	16.0381	15.8588	15.9159	15.9683	15.7295	15.9338
PCNA	not-sig	not-sig	#N/A	#N/A	#N/A	#N/A	NA	14.5325	14.615	15.101	14.6284	14.5775	15.0209	16.6016	14.6266	14.6739	14.3489	14.9747	14.1291	14.8468	15.4557	15.5132	14.4413	14.625	15.2646	15.4057	14.4276	15.3689	15.0259	14.3485	14.5117	15.2377	14.247	16.1003	15.3957	15.2784	14.2037	14.964	14.7553	15.4018	14.5366	14.1782	15.49	14.0552	15.0311	14.8718	14.286	14.7342	14.114
ST14	not-sig	not-sig	#N/A	#N/A	#N/A	#N/A	NA	13.8469	15.0914	14.6482	14.9392	14.5828	14.3018	12.5613	13.6541	14.7465	14.7574	14.7012	14.1398	14.2504	15.2199	14.2892	15.0055	14.8398	15.0785	14.3417	14.19	15.3675	12.8517	14.8989	14.9327	15.4846	15.3266	14.5634	14.4257	14.8321	15.0617	14.8146	14.3368	14.4156	14.8798	14.8353	13.9896	14.636	14.5413	14.2383	14.9825	14.0661	15.265
ITGA5	1	EMT	0.472872	0.0346175	1.83109	0.0289892	YES	14.4106	13.7561	12.7385	13.9359	13.652	12.0625	14.051	13.6851	13.6416	14.4174	13.6502	13.8288	13.5798	14.2765	13.1403	14.1892	12.9761	15.5893	12.9262	13.3254	13.406	14.8839	14.0465	13.1196	13.5769	13.5199	14.8732	12.4225	12.9467	12.3114	12.2729	14.4498	12.8565	14.2391	12.53	13.433	13.748	13.937	13.4453	13.0182	14.7426	13.6051
LRRC47	not-sig	not-sig	#N/A	#N/A	#N/A	#N/A	NA	16.489	15.3859	15.2469	15.6727	16.2296	15.3832	14.8645	15.4908	15.4445	14.5745	15.7883	15.5109	15.1502	15.3701	15.2642	15.7249	15.96	15.2741	15.4633	15.4628	15.3414	15.3124	15.4369	15.5382	15.2575	15.3835	14.9759	15.4449	15.4698	15.461	15.5618	14.9276	15.3178	14.8652	15.038	15.4541	15.3177	15.3209	15.2883	15.5709	15.1698	15.3035
DHCR24	not-sig	not-sig	#N/A	#N/A	#N/A	#N/A	NA	14.7871	14.1939	15.0502	14.9573	13.1894	14.8805	13.1568	14.2726	15.0186	14.7656	14.2179	14.0557	13.7098	14.7399	15.0755	14.8742	14.6609	15.2492	15.0751	13.7306	14.8143	13.522	13.9619	14.0823	14.87	14.7285	14.3368	14.6859	15.1435	14.3222	15.1875	14.5439	14.5815	14.3833	13.2828	14.9103	15.2123	14.6527	15.3123	14.1788	13.3303	14.2993
PPIF	not-sig	not-sig	#N/A	#N/A	#N/A	#N/A	NA	13.4699	13.197	15.3654	14.0222	13.3869	13.9736	18.2002	13.7018	13.7873	13.5592	13.9655	13.5827	14.8159	13.9213	13.6445	14.0539	13.7556	15.2543	13.9988	13.5578	13.7628	12.9112	13.3739	13.9031	13.7399	13.8709	14.5036	13.7883	13.6021	13.7684	13.8688	11.8191	13.755	13.8881	15.0492	13.9911	13.9978	13.508	13.6291	13.8031	13.803	13.2807
RAF1	not-sig	not-sig	#N/A	#N/A	#N/A	#N/A	NA	14.7368	13.8716	13.586	14.1413	14.595	13.5456	14.3189	14.6638	13.7816	13.1794	13.6368	14.6833	13.4158	13.98	14.354	13.7033	14.0603	13.6716	13.7563	13.5239	14.582	14.0069	14.3242	14.175	13.1189	13.8356	13.6523	13.7867	13.2922	13.9351	14.0742	13.3389	12.1991	14.0107	14.3392	14.2446	13.6006	13.8043	14.0636	14.007	14.4873	14.0743
TRMT112	not-sig	not-sig	#N/A	#N/A	#N/A	#N/A	NA	14.1133	14.4742	14.8873	14.1201	13.0746	14.3953	16.8569	13.8913	13.552	13.3399	14.275	13.7925	13.9575	13.466	14.7329	14.3983	13.8693	13.8061	14.7632	14.523	14.5943	13.7774	13.3543	14.3598	14.4314	14.5326	14.5847	14.5833	14.4236	13.2391	14.1595	14.1812	15.4052	14.5106	13.8663	14.9025	14.1625	14.2223	13.8075	13.6178	13.7096	12.1277
CMBL	not-sig	not-sig	#N/A	#N/A	#N/A	#N/A	NA	14.6919	14.9693	14.0636	15.0569	15.2888	14.5705	17.535	15.6555	13.9358	13.8549	13.9357	13.7723	14.5557	14.9475	16.1857	15.4598	12.9191	14.5735	12.7748	14.5246	13.6926	13.3436	15.5624	15.0293	12.6038	11.9096	14.5149	14.4246	13.402	13.6368	12.0897	14.6884	12.414	14.9382	14.1939	15.3608	13.5413	16.1027	14.4924	13.9052	13.8501	14.5332
RPSA	not-sig	not-sig	#N/A	#N/A	#N/A	#N/A	NA	16.5816	16.6436	16.796	15.9833	15.9735	16.4543	16.271	16.8063	16.5556	16.5506	17.0253	15.9833	17.4766	16.5812	16.5781	16.8881	16.0866	17.9517	16.5885	16.6381	16.7324	16.3481	16.0401	16.7113	16.9966	16.2885	16.0775	16.4695	16.822	15.6396	16.2446	16.5878	16.5771	17.0869	16.3205	16.3808	16.413	16.5807	16.4432	16.8353	16.5418	16.5441
USP9Y	not-sig	not-sig	#N/A	#N/A	#N/A	#N/A	NA	15.1455	15.1613	14.6715	14.758	15.3217	14.2631	13.6353	14.6313	14.7276	14.3215	14.5189	14.7116	14.6473	14.5907	14.6587	14.2335	14.7929	15.4186	14.2852	14.4041	15	14.597	15.1783	14.9895	15.4259	15.1664	14.8828	14.7057	14.482	14.5724	14.9274	14.3566	16.3364	14.8301	14.6368	15.1053	15.4938	14.0533	14.6414	14.7267	15.565	14.809
BAG3	not-sig	not-sig	#N/A	#N/A	#N/A	#N/A	NA	13.5663	13.4615	12.5353	13.9043	14.7629	12.937	15.0113	14.3931	14.1167	13.1638	13.0684	13.9012	13.9133	13.1489	13.1421	12.7855	13.2727	15.7235	13.8273	12.8191	12.7409	14.3179	13.3245	13.575	12.0986	11.779	13.8819	13.0321	13.3851	13.0838	12.2411	13.3395	10.6644	12.5233	12.5467	15.0148	12.834	14.3588	13.2209	12.8665	14.8174	14.6958
HBD	not-sig	not-sig	#N/A	#N/A	#N/A	#N/A	NA	16.575	18.5138	17.8626	19.7039	17.4646	17.1722	19.2055	17.8495	18.4664	16.9011	18.1374	17.6503	17.2513	18.72	16.2923	18.5334	18.2972	18.1699	18.3768	17.8148	17.5654	17.8728	17.0834	18.58	19.2131	17.7447	18.5967	18.0764	16.9633	19.2369	18.6437	18.6862	19.0673	18.7008	17.3091	18.007	19.0096	19.3019	18.95	17.6416	20.5712	20.3453
FUCA1	not-sig	not-sig	#N/A	#N/A	#N/A	#N/A	NA	15.7307	17.5652	15.3279	16.5465	15.3468	15.5327	15.8877	15.6506	15.3465	16.5808	16.0195	15.5885	16.2271	16.0629	15.0278	16.1731	16.3779	15.5079	15.3128	16.1868	15.8863	14.9959	16.4043	15.4752	15.8646	15.3987	16.1407	15.1361	15.603	16.2892	15.1808	15.0721	16.4907	16.0651	14.9918	13.5675	14.8824	15.5795	16.6345	15.4215	15.9084	16.2808
CTNNA2	not-sig	not-sig	#N/A	#N/A	#N/A	#N/A	NA	14.3574	15.2138	15.0877	14.7633	12.5127	14.8917	12.4993	14.0592	13.6199	15.4022	14.5658	14.5718	15.6287	14.8263	14.0226	15.3457	14.0773	15.2723	14.537	15.1445	14.5068	14.58	14.2242	15.1392	15.1287	14.5285	14.1503	14.41	14.6694	14.2083	14.0415	14.7097	13.544	14.2827	14.0815	14.1784	14.2855	14.5577	15.0099	15.6071	13.4435	14.8236
PRKAA1	not-sig	not-sig	#N/A	#N/A	#N/A	#N/A	NA	14.6553	14.3464	14.3486	14.3993	14.3143	13.9052	16.1062	14.1162	13.9809	13.5363	14.1435	14.1208	14.0625	13.8371	13.9077	14.1056	14.1281	13.1648	14.1179	14.1332	13.8378	14.2805	14.4369	13.9463	13.4361	14.2579	14.382	13.7485	13.8759	14.6091	14.0892	14.1054	12.8941	14.0692	14.6617	13.8325	13.6694	13.7976	14.1474	14.2312	14.5643	14.1376
TOR1AIP2	not-sig	not-sig	#N/A	#N/A	#N/A	#N/A	NA	13.3767	13.6771	12.9977	12.9935	11.3144	12.6483	10.9488	12.1415	12.9244	11.7019	12.9717	12.7243	11.3987	12.9199	12.7772	13.0667	12.5902	12.2517	11.9986	13.0106	13.0488	13.4335	13.3335	12.5869	6.34823	12.8387	12.7787	11.912	12.8605	11.4485	13.0174	13.0605	12.3654	13.1585	13.2001	13.0921	12.1986	12.2602	13.1152	13.3665	12.3611	12.4353
GDPGP1	not-sig	not-sig	#N/A	#N/A	#N/A	#N/A	NA	15.4478	14.257	14.6273	16.0871	15.7201	15.7828	16.3901	14.2897	16.0248	14.8373	14.1291	15.2387	11.5925	14.644	16.0036	15.2543	15.9855	13.9996	14.9762	14.8327	16.4	15.0967	15.6643	15.6502	13.8627	15.5866	15.3154	15.4213	15.3002	16.2693	16.3483	14.6579	12.8711	14.7581	14.8648	15.2361	13.6612	14.9591	15.9452	15.5963	15.0754	15.38
HADHA	2	METAB	#N/A	#N/A	#N/A	#N/A	NA	15.0325	15.6765	15.6049	15.313	15.5123	15.8455	16.8427	15.244	15.4009	15.882	16.1376	15.003	15.7779	15.6094	14.9093	15.9269	15.5274	16.1397	15.1392	15.2298	15.5485	15.0486	15.436	15.6646	15.5559	15.5891	15.4339	15.8235	14.9881	16.0355	15.5774	15.8354	15.6629	15.0543	16.3116	14.7043	15.7073	15.0576	15.4826	15.1886	15.3339	15.2416
NIT1	not-sig	not-sig	#N/A	#N/A	#N/A	#N/A	NA	14.1854	14.0601	12.8085	13.7466	14.4525	11.5029	13.4937	13.6427	12.984	13.1299	13.1743	12.7846	12.3073	13.3284	12.127	13.2159	12.7595	13.7192	12.271	13.3466	12.4083	14.1601	13.3737	12.3515	11.6045	12.2237	14.1067	12.9952	12.414	12.9022	13.2173	13.2085	9.52579	13.2647	14.4311	12.6011	12.6719	13.5854	12.7522	13.568	14.1011	13.4522
DPP7	not-sig	not-sig	#N/A	#N/A	#N/A	#N/A	YES	13.7739	14.7145	14.5536	14.0646	14.5458	15.0663	12.4641	15.7058	14.4704	15.015	14.3707	15.0547	15.5408	14.0534	14.396	14.0519	14.1655	16.0618	14.7204	15.0116	13.6973	15.0957	14.9411	14.2121	13.907	14.8633	14.645	15.5373	14.3489	15.1818	12.8577	14.7053	12.7394	15.7307	14.4229	13.539	13.6803	14.8617	15.6524	15.0371	16.231	16.6707
IRF2BP2	not-sig	not-sig	#N/A	#N/A	#N/A	#N/A	NA	13.7178	12.1954	12.2923	12.1193	10.9095	12.3302	9.3826	13.3659	12.6125	11.1551	13.015	8.96969	11.9091	11.7278	11.7592	12.4102	12.7172	10.3283	10.143	12.3219	12.966	13.7582	11.3003	10.3647	11.4378	11.4046	13.0828	11.9857	10.2497	12.9071	10.5667	10.1983	12.2514	13.0481	13.435	13.2945	12.6329	11.6174	10.9412	12.9091	12.0665	10.444
MAP1A	1	EMT	0.41028	0.0340955	2.15725	0.031024	NA	14.1052	11.427	13.4195	13.2939	12.1117	12.6744	12.2971	13.5749	13.188	11.9137	13.4769	14.194	11.6626	14.3842	12.6221	11.1971	13.3625	14.9398	14.0938	13.9203	12.094	13.2036	11.3506	13.9166	11.618	14.0786	11.3084	14.5944	12.8377	14.8502	12.6697	14.104	13.6089	12.729	13.4204	13.3683	12.7057	13.1154	11.9712	12.8445	12.5987	13.8371
STRN	not-sig	not-sig	#N/A	#N/A	#N/A	#N/A	NA	13.3026	13.4223	13.6443	13.8601	13.9826	13.931	14.5866	13.5869	13.1664	14.206	14.1258	13.8878	14.3165	13.5609	13.5102	14.4598	13.7861	14.2863	14.2102	13.7563	13.2636	14.7486	13.5181	13.2215	13.7917	13.9422	13.2193	13.4532	13.4971	12.5401	13.9101	13.0609	15.1517	13.1689	13.1909	13.7577	13.4621	13.3414	13.1823	13.1155	13.1314	13.3273
CLTB	not-sig	not-sig	#N/A	#N/A	#N/A	#N/A	NA	12.8645	14.359	12.9158	12.9651	13.2369	12.7413	12.6605	13.6766	13.0076	11.6587	13.0391	12.4706	10.3113	13.7046	13.0745	13.4839	12.3881	12.1481	12.6717	14.5343	13.2538	12.7629	14.5684	12.4423	12.2085	12.8806	13.833	13.3119	13.4258	13.501	12.6634	14.234	12.243	12.9864	13.2936	13.1462	12.4544	13.7733	13.3439	13.5639	14.1182	13.6247
RAC1	not-sig	not-sig	#N/A	#N/A	#N/A	#N/A	NA	16.6236	15.3073	16.2899	16.2641	15.8447	16.1344	15.3464	16.9513	16.3919	14.7939	15.394	15.9494	15.4635	16.4188	16.3605	16.4728	16.3814	14.19	16.4764	16.1329	16.5624	16.7065	16.4857	16.4586	15.8912	16.3491	16.2785	16.7054	16.3256	16.3935	16.4512	16.8048	16.3117	16.6291	16.6391	16.1846	15.9876	16.42	16.7333	16.2612	16.7094	16.634
GRAMD4	not-sig	not-sig	#N/A	#N/A	#N/A	#N/A	NA	14.8214	14.2938	13.0616	15.7142	9.35411	11.1695	11.0928	13.8613	11.3384	10.912	10.2877	12.7944	13.4837	10.2211	15.4647	10.3229	13.1464	10.5369	11.2029	13.3733	15.7617	13.6733	13.0062	10.7318	15.1823	13.269	13.8587	12.711	12.8713	15.0176	15.0997	10.047	11.2352	12.5937	10.8172	16.1948	10.5173	13.2439	11.2548	10.8845	11.3327	14.4082
SLC27A4	1	EMT	-0.456993	0.0204355	0.545271	0.0313871	NA	15.1912	14.7151	14.619	14.6056	13.635	14.1623	11.8738	14.7276	14.3689	13.1668	14.7907	14.7566	14.3143	14.5664	14.4105	14.0263	14.6241	13.3951	14.5705	13.3308	13.7328	15.1493	14.3006	14.0782	13.6289	14.2786	14.1754	14.4668	14.6817	13.9059	14.2337	14.7737	13.6101	14.079	13.6968	14.6684	15.5802	13.8569	14.5828	14.3014	13.964	14.6102
ERGIC1	not-sig	not-sig	#N/A	#N/A	#N/A	#N/A	NA	16.2901	16.2998	15.7397	15.6034	15.8421	15.6592	11.4929	15.5046	14.7881	16.4275	16.0174	15.9236	16.0728	16.0241	16.1787	16.3499	15.2825	15.6592	15.6533	15.9594	16.0677	15.2372	15.936	16.236	15.8317	15.9923	15.5281	15.9382	15.9307	15.3629	15.6445	16.2189	15.854	15.4933	16.1151	16.0098	15.35	16.1575	15.7287	15.8436	15.9542	16.0491
KRT18	not-sig	not-sig	#N/A	#N/A	#N/A	#N/A	NA	19.7211	19.8274	19.44	19.7653	17.1881	19.8911	19.4433	19.8731	20.0347	18.8486	17.9724	19.9946	18.603	19.3318	19.6895	19.6805	19.2269	19.8626	18.1919	19.5964	19.752	20.1588	20.702	19.2531	18.4146	19.2665	18.2029	17.3961	20.1917	19.589	19.9848	20.0028	19.9609	19.5782	20.3686	19.5256	19.0394	19.195	20.0007	20.647	19.0654	19.582
H1-0	not-sig	not-sig	#N/A	#N/A	#N/A	#N/A	NA	17.1699	16.237	15.5026	15.2776	13.5612	16.1977	16.5933	15.2649	14.5548	16.7303	15.6817	14.9521	16.9398	15.5354	13.8956	15.8988	14.6132	16.5109	15.0526	15.7365	14.7674	16.4592	14.9288	15.631	15.3873	15.303	15.8621	14.3619	14.4371	16.3164	14.8896	16.5629	15.0792	15.1593	15.1593	15.0928	17.1894	15.4634	15.2818	15.7648	15.4841	15.4302
RPL11	not-sig	not-sig	#N/A	#N/A	#N/A	#N/A	NA	17.0273	17.3116	17.0659	17.1078	17.0541	16.9588	16.4524	16.8814	17.3636	16.8111	17.5256	17.3003	16.482	17.1365	17.4964	17.1764	17.4162	16.0472	17.1457	17.1214	17.4253	16.8231	17.3271	17.2466	17.266	17.3321	17.3042	17.2307	17.2407	17.4854	17.3055	16.7432	16.8654	17.1946	17.0953	17.3318	16.8551	17.0073	17.184	17.0648	16.6491	16.8682
BRIX1	not-sig	not-sig	#N/A	#N/A	#N/A	#N/A	NA	14.0308	14.163	14.5953	13.8275	14.0428	14.5661	17.1138	14.2432	14.5159	14.2506	14.0647	14.3005	14.8846	14.1732	14.483	14.3636	14.3431	14.6877	14.5393	14.2707	14.3739	14.2289	13.8865	14.3884	14.6535	14.2271	13.9563	14.3838	14.1415	13.985	14.2937	13.7293	15.3141	14.5123	14.0501	14.3828	14.3103	14.5755	14.2931	14.398	14.1751	13.8258
RBMX	3	CANONICAL	#N/A	#N/A	#N/A	#N/A	NA	17.5649	17.6325	17.465	17.3267	17.2975	17.7684	17.3971	16.5188	17.5445	17.1772	17.5956	17.2277	17.3893	17.5606	17.4843	17.4449	17.621	16.2006	17.5248	17.7292	17.8478	16.7886	17.7668	17.0211	17.4293	17.6397	17.3133	17.2072	17.1598	17.2471	17.3978	16.9813	17.0906	17.1998	17.5386	17.5148	17.229	17.0824	17.26	17.5573	16.5707	16.5567
HSPE1	not-sig	not-sig	#N/A	#N/A	#N/A	#N/A	NA	16.0923	15.7969	16.3305	16.5765	17.2171	17.4831	16.5008	14.2936	16.2109	17.9124	17.6384	14.9534	15.1066	15.58	16.3646	16.7229	16.4069	16.1323	16.3973	16.2576	16.4349	15.1812	15.8165	15.8563	16.4746	18.1549	16.8536	17.0427	16.1121	16.0546	17.0919	15.7239	16.5232	15.8789	15.4034	15.4515	16.5285	15.112	15.8595	16.2851	15.1093	15.4894
TBC1D10B	not-sig	not-sig	#N/A	#N/A	#N/A	#N/A	YES	13.5541	11.8696	12.2703	12.9803	14.1967	12.4921	13.8832	13.2527	13.0154	12.2283	11.1437	13.2654	10.9041	13.0698	13.3908	12.9602	13.0679	12.5441	13.2323	11.34	13.0475	13.4347	12.081	10.4981	12.3072	11.9252	13.3562	13.1603	12.564	13.6475	12.7546	11.5476	12.5133	11.742	12.3132	13.3914	13.1093	11.6531	13.0801	11.982	12.9883	12.8901
DPYSL4	not-sig	not-sig	#N/A	#N/A	#N/A	#N/A	NA	13.7664	13.9524	14.1335	14.2614	12.3332	13.4878	13.1016	14.7762	13.5767	13.3924	14.4924	14.1997	14.7298	13.2629	13.2095	12.7256	13.6825	12.6406	13.4642	13.6975	14.2118	14.5938	13.8146	12.9368	13.7147	13.5723	13.6483	12.8139	12.5424	13.2238	13.5991	14.2988	15.5156	14.4347	14.2155	15.3444	14.8612	14.1713	13.8483	14.9086	13.9911	14.4036
GBE1	not-sig	not-sig	#N/A	#N/A	#N/A	#N/A	NA	11.76	12.6088	12.8503	12.1774	12.7533	12.4279	16.2074	13.5091	12.4161	13.5033	12.4514	12.7945	13.903	11.9562	12.4872	12.2929	12.0432	14.3282	12.3508	12.0746	12.6705	13.3978	12.4571	12.3926	14.1863	12.1543	11.9694	12.6221	12.4071	12.9739	12.2505	12.6381	12.459	12.8649	13.2785	12.1041	14.626	13.2308	12.2943	12.7556	13.0974	12.4125
RSRC1	not-sig	not-sig	#N/A	#N/A	#N/A	#N/A	NA	12.0161	12.5957	11.8523	12.115	13.0169	12.7294	13.4261	14.9234	11.8727	12.3832	11.2876	10.8337	12.8239	11.8237	14.4729	10.5496	12.0649	12.1399	10.6913	11.7755	12.1491	11.3616	11.5972	12.0843	12.1796	12.0618	11.8519	12.5368	11.9412	12.5182	11.3427	12.4101	12.4815	11.3681	12.4482	13.9314	12.1732	14.8697	12.2181	13.9026	12.9488	11.9206
TRIO	not-sig	not-sig	#N/A	#N/A	#N/A	#N/A	NA	12.8762	11.4665	13.483	12.3141	13.5804	12.68	12.5141	13.8621	12.5349	12.3106	12.1015	12.7279	13.2097	12.2139	11.9522	12.4506	13.0881	13.353	12.5853	12.1634	12.9111	13.9305	12.4272	12.9444	12.4144	12.2573	12.1864	11.9154	11.9329	12.5539	12.8968	12.0587	12.8651	11.9378	11.8663	12.2039	12.49	11.8925	12.4212	12.2172	14.0361	13.2176
NUDT5	not-sig	not-sig	#N/A	#N/A	#N/A	#N/A	NA	15.1937	15.1679	14.3402	14.7077	14.4718	14.6959	15.6476	14.2873	14.2676	14.9137	14.8791	13.9791	16.1416	14.5986	15.0724	15.061	14.2837	14.2041	15.1786	14.9608	14.4999	14.4691	14.3617	14.5439	14.7019	15.2407	15.6768	14.9292	14.8298	14.1338	13.9068	15.0481	15.6377	15.0398	14.7865	14.7876	14.261	14.8074	14.2774	14.3381	14.2714	14.2214
USP39	not-sig	not-sig	#N/A	#N/A	#N/A	#N/A	NA	12.934	13.4153	13.3603	13.0703	13.2995	13.5477	17.4384	13.1109	13.2438	13.5859	13.3098	13.127	13.5967	13.006	13.3606	13.1867	13.36	13.8917	13.0441	13.4085	13.4864	13.2599	13.2706	13.1311	13.4721	13.8323	13.7297	13.6122	13.298	13.0124	13.3109	13.1444	14.1017	13.2756	13.3507	13.5534	13.4592	13.2694	13.0463	13.599	12.759	13.5236
LMNA	not-sig	not-sig	#N/A	#N/A	#N/A	#N/A	NA	18.02	18.2109	17.9169	17.6468	18.001	17.3577	17.4623	17.4872	17.5857	17.1523	17.985	17.7438	18.0463	17.6864	17.9782	17.7467	17.2358	15.5774	17.3658	17.6896	17.2678	18.0066	17.3303	17.2327	17.1531	16.7668	17.0855	17.7349	17.744	17.77	17.3255	17.9095	17.5328	17.3261	17.551	18.208	18.1597	17.5229	17.5067	17.9231	17.8625	17.6869
USP15	not-sig	not-sig	#N/A	#N/A	#N/A	#N/A	NA	13.9593	13.9432	14.1329	13.7081	14.2133	13.8301	12.67	13.7185	14.3259	13.98	13.6383	14.4481	14.1306	13.833	13.8112	14.0493	14.2252	14.103	14.105	13.8617	13.5026	14.0083	14.4078	14.3065	13.96	14.0733	12.0054	14.1598	13.9542	13.8557	13.7106	13.7537	13.6251	13.7594	14.1014	13.896	13.6142	13.9469	13.9471	13.199	14.2881	13.8526
PARN	not-sig	not-sig	#N/A	#N/A	#N/A	#N/A	NA	15.6526	14.4781	15.2964	14.4596	14.6174	15.2085	10.5364	14.229	15.1498	13.7806	14.3674	14.0765	13.5584	14.2045	15.1121	14.4792	15.2033	11.3779	14.6222	13.0173	15.6901	14.0923	14.3581	14.652	14.2629	15.446	15.1977	14.8755	14.4621	13.369	14.6282	13.2471	12.0514	12.7454	13.9031	13.8529	12.6736	12.7455	12.5457	14.6055	12.8368	11.5946
TBC1D8B	not-sig	not-sig	#N/A	#N/A	#N/A	#N/A	NA	12.6289	13.7077	13.2923	14.7013	13.2569	11.5964	14.96	12.5849	13.7904	13.3328	11.6513	13.5268	11.8204	13.4452	11.8735	11.1674	12.2885	11.5044	12.448	13.2931	12.762	13.001	12.7915	14.0378	14.4052	12.4267	13.8166	12.847	12.6666	12.0387	13.2409	12.7027	12.7141	13.0499	11.8647	13.3544	11.8668	15.8313	13.3548	12.8007	12.5822	12.9775
PEX14	not-sig	not-sig	#N/A	#N/A	#N/A	#N/A	NA	12.4112	12.6284	11.8273	12.4718	13.3547	11.66	12.0294	12.613	12.4313	11.0891	12.2002	11.5428	11.7983	10.9606	11.9082	11.3269	11.8356	13.5933	12.039	11.4147	11.3489	12.8129	11.4182	10.6733	11.0016	11.0328	12.8436	10.8514	11.8322	11.4697	11.8839	12.8679	11.1228	11.7866	8.36469	12.4125	12.5215	11.1918	10.8113	11.4225	11.9231	12.98
MICAL3	not-sig	not-sig	#N/A	#N/A	#N/A	#N/A	NA	13.2026	13.3953	13.4915	13.7633	15.2499	11.5978	14.2633	16.9152	13.3078	11.8972	13.4825	13.3115	13.4445	12.8563	13.3308	12.6512	12.5396	12.9793	13.0092	12.8423	12.6643	14.7308	12.4123	13.0234	13.4009	13.4454	12.4378	13.2002	13.174	11.3328	12.456	13.2846	13.1757	12.248	12.2792	13.3723	13.1556	12.9336	13.4541	13.1025	13.3458	14.7084
GOT2	2	METAB	#N/A	#N/A	#N/A	#N/A	NA	17.2349	17.0866	17.3026	16.9206	16.6346	17.4161	17.0045	17.0343	16.6711	17.8843	17.0998	16.4105	17.2976	17.6344	16.7851	17.2421	16.0626	16.3777	16.6638	17.1723	17.3573	16.4197	16.5606	16.5548	17.0619	16.795	15.838	16.507	16.6852	16.6206	16.9669	15.8972	16.9993	16.441	17.1422	16.3211	17.1249	16.3362	17.0797	17.5198	16.1095	16.3629
CHERP	not-sig	not-sig	#N/A	#N/A	#N/A	#N/A	NA	14.2974	14.1615	14.2081	13.8216	14.0485	14.6822	11.795	14.0857	14.4144	14.1511	14.1145	14.3488	14.4647	14.1044	14.459	14.0833	14.226	14.3696	14.3537	14.1613	14.0634	14.2044	13.9832	14.4092	13.8195	14.1082	13.7427	14.1143	14.1596	14.4162	14.0774	13.8722	14.9365	14.3896	14.2884	14.0137	14.0765	14.0974	14.3758	14.3349	14.2543	14.1364
FMNL1	4	IMMUNE	#N/A	#N/A	#N/A	#N/A	NA	14.2313	14.27	14.3499	14.5562	15.9871	15.0931	13.3021	15.3597	16.7111	13.7962	13.6022	14.722	14.2676	13.8496	13.9723	13.6386	13.9995	14.6386	14.7294	14.0488	14.3734	15.4512	14.2433	13.7707	13.8458	13.2804	13.5248	15.1536	13.8275	16.5389	14.8922	14.7643	14.7074	14.8573	14.6414	14.5464	13.4355	16.1287	15.3405	15.0814	14.7789	15.057
TMEM63A	not-sig	not-sig	#N/A	#N/A	#N/A	#N/A	NA	15.2446	14.4195	14.6625	14.5883	15.0762	13.7977	14.421	14.6797	14.7907	15.1301	14.6664	14.5629	15.2873	15.0937	14.7168	14.8928	14.9899	13.7631	14.4107	13.9725	14.21	14.2421	14.629	14.9048	14.202	14.367	12.2195	14.2953	14.2915	15.233	14.8733	14.3727	14.9844	15.0304	15.9445	14.6266	15.1063	14.1058	13.886	15.6665	13.9926	14.1988
CMTR1	not-sig	not-sig	#N/A	#N/A	#N/A	#N/A	NA	13.116	13.2391	13.5898	13.6286	13.3553	13.7668	16.6618	12.8624	13.388	13.6385	13.055	13.4561	12.8578	13.2585	13.3546	13.1178	13.4772	12.3529	13.1228	13.4587	13.6242	12.8196	12.9234	13.0222	12.4949	13.5721	13.146	13.5157	13.1423	13.4079	13.2917	13.1119	12.0021	13.7601	13.8359	13.4489	13.1636	13.2164	13.1911	13.3441	13.7592	13.2893
LAMB2	1	EMT	0.566216	0.049886	1.48484	0.0352551	NA	14.947	12.3198	14.4861	14.5697	13.5123	13.6414	13.1141	16.2046	13.6561	14.5047	13.3527	12.5955	15.553	13.8396	13.0541	13.3181	13.1247	16.062	14.4941	13.104	13.974	14.746	13.0392	13.3773	13.8305	12.3211	13.4663	13.7618	13.6781	14.6427	13.4032	15.1563	15.2116	13.6177	13.0627	13.0074	14.2316	13.5454	13.398	14.5954	16.2772	16.0293
LRRC1	not-sig	not-sig	#N/A	#N/A	#N/A	#N/A	NA	11.4439	13.4503	14.5873	13.4813	14.424	13.8754	12.9667	14.043	12.7469	13.5101	14.2128	12.4629	13.2155	13.9982	14.5499	13.9203	13.3795	13.2667	12.7374	14.0887	13.501	10.6755	14.5192	12.3673	13.2493	13.1163	13.7491	12.9377	13.832	13.1684	13.6707	13.575	14.817	12.3359	13.5263	14.7059	13.1325	14.3794	13.4954	14.3836	13.0003	13.626
PPP1CA	not-sig	not-sig	#N/A	#N/A	#N/A	#N/A	NA	15.607	15.7243	15.815	15.6998	16.1895	16.0312	15.785	15.5659	15.9059	16.2168	15.6899	15.7894	15.3865	16.1078	16.2369	15.3017	16.0861	14.1562	16.0638	15.7373	15.9371	15.8918	16.0134	16.0036	15.5113	15.9332	16.0226	16.1091	15.9048	15.827	15.8773	15.6866	16.5738	15.7542	15.866	16.015	15.7114	15.6896	15.7435	15.8102	15.5283	14.9917
PABPC1	not-sig	not-sig	#N/A	#N/A	#N/A	#N/A	NA	15.9799	16.8568	16.9364	16.8862	16.6374	16.9432	15.8882	16.2671	17.111	16.9165	16.7194	16.9135	17.117	16.7376	17.1841	16.4423	17.2814	16.407	16.7285	16.3813	16.8961	16.4607	16.8448	16.6762	17.1908	16.9302	16.8399	16.8641	16.963	16.7482	16.6349	16.0299	17.2759	16.4859	16.9016	16.6932	16.4642	16.9216	16.7464	16.6884	16.5442	15.8667
AARS1	not-sig	not-sig	#N/A	#N/A	#N/A	#N/A	NA	15.3605	14.9848	15.1541	15.2346	16.1139	14.8236	16.3026	15.3623	15.3196	15.6823	15.2984	15.6222	15.38	15.1348	15.4402	14.8111	15.1304	16.1169	15.5307	15.3388	15.2667	15.817	15.4596	15.9465	15.4865	15.8166	15.5308	15.2621	15.313	15.2223	15.52	15.4348	15.335	15.1713	15.1716	15.778	15.0485	15.2517	15.5396	15.023	15.2567	15.1198
SH3PXD2B	1	EMT	0.257218	0.0357932	2.55834	0.0360009	NA	14.4343	14.0061	14.1367	14.1551	9.74215	13.2137	12.9812	14.1737	13.9993	13.8803	14.2905	14.2121	13.9156	13.7669	13.5694	13.7258	13.9408	12.9945	14.2516	13.5137	14.3878	14.3966	13.9076	13.9177	13.4639	14.1115	13.843	14.1119	13.6759	13.9093	14.1112	13.9807	13.8772	13.8787	14.2401	14.2772	14.6261	13.6645	13.6894	13.3614	14.6135	14.2153
PUM3	not-sig	not-sig	#N/A	#N/A	#N/A	#N/A	NA	14.7176	14.4231	15.2642	15.1718	14.952	15.4035	11.7722	14.7428	15.0534	14.8693	14.6525	15.5857	14.9996	14.8931	15.0474	14.6622	14.975	15.42	14.4543	15.3053	15.0677	14.6845	15.0095	14.3754	14.8597	14.5556	14.3462	14.8135	14.6821	15.2154	14.7924	14.3033	14.582	13.9857	14.1853	14.198	14.2879	14.8125	13.8891	14.5665	13.9271	14.0472
TTC27	not-sig	not-sig	#N/A	#N/A	#N/A	#N/A	NA	12.041	12.568	13.4113	14.3574	12.4736	10.6432	15.0176	10.644	15.3172	12.9288	13.0919	11.7253	13.4802	13.0373	12.5225	11.6037	11.9439	11.0545	11.5796	11.9803	11.9796	14.4853	10.3644	11.113	12.7049	12.0155	10.3911	13.331	11.5543	14.5994	11.4999	13.94	13.5583	12.1215	12.0921	12.2285	14.0607	11.9959	13.25	13.4287	11.9471	10.7735
PSPH	not-sig	not-sig	#N/A	#N/A	#N/A	#N/A	NA	14.175	14.4107	14.4077	13.8146	14.6261	14.267	10.2652	14.9918	14.7949	14.3173	14.439	12.8445	15.196	13.9017	14.7245	13.8214	16.0555	16.1332	14.6866	15.6607	13.0443	13.4077	14.2416	14.6302	13.3063	15.7703	14.9503	14.67	14.13	13.7281	13.9494	14.8756	13.13	14.0787	13.6801	15.6055	15.1188	15.1852	13.4972	15.1535	10.4014	14.1632
TCAF1	not-sig	not-sig	#N/A	#N/A	#N/A	#N/A	NA	12.3446	12.3032	12.1473	12.8645	12.5726	12.6407	12.3282	12.432	11.9888	11.1548	12.6054	12.7436	11.7335	12.9608	13.7384	12.2555	12.7232	11.5439	12.8406	13.6498	12.9137	13.6592	13.0124	13.0691	11.0304	12.8236	12.5477	13.8041	11.5098	11.8994	12.1506	11.7882	12.7995	13.5248	13.5373	13.2068	12.3137	10.8901	12.9294	11.9544	10.9936	10.7337
PURB	not-sig	not-sig	#N/A	#N/A	#N/A	#N/A	NA	13.1522	12.4448	13.5796	13.1893	12.9674	12.4015	10.8108	13.2646	12.3661	13.6958	12.9514	12.3852	14.722	12.6599	12.9614	12.5113	12.6408	14.0486	12.8208	13.6808	12.7243	12.0503	13.4879	12.4567	13.0139	13.2418	13.0566	12.1796	13.0512	12.8222	12.4291	13.361	13.6344	12.8566	12.5913	12.4697	13.0165	12.7541	13.0249	13.5044	12.7334	13.3135
SDC1	not-sig	not-sig	#N/A	#N/A	#N/A	#N/A	NA	13.6058	13.3035	14.5288	13.495	13.1289	13.8921	12.7196	13.8024	13.4868	13.7767	13.4285	14.6757	13.4821	12.7689	14.0648	14.5484	12.5966	13.2046	13.0954	14.6782	13.6798	13.1734	14.5256	14.7207	14.1179	14.4019	12.2456	14.4226	14.152	13.9461	13.7415	15.809	15.3411	14.4088	14.7656	12.4393	14.5042	13.4852	14.1731	13.4263	12.516	13.4757
ZG16B	not-sig	not-sig	#N/A	#N/A	#N/A	#N/A	NA	11.0113	12.0901	11.3105	11.2182	11.2351	11.5586	12.6537	14.7033	12.7997	12.8439	11.6296	12.4226	11.688	11.7142	12.1933	12.363	13.1291	11.027	9.90265	11.467	11.7941	16.9122	12.0854	12.8442	13.2923	12.3765	11.7031	10.4963	11.3245	13.3474	13.5325	11.9207	12.5302	11.4876	11.8546	12.6693	13.5851	14.6878	12.029	13.9295	12.075	13.8709
ACOT13	2	METAB	#N/A	#N/A	#N/A	#N/A	NA	14.9857	15.5523	16.0135	15.0962	14.1488	16.6945	16.5327	15.5082	14.84	16.6433	14.3099	14.5451	15.7764	14.8023	14.5928	15.7293	15.1503	14.4598	14.4544	15.1112	15.8665	14.4799	14.7225	14.4588	15.4271	16.1521	15.0254	14.721	14.4951	14.8577	15.1633	15.431	15.4806	15.0834	16.1644	14.5422	15.5027	14.1384	13.9041	16.4423	14.4036	14.6331
NIPSNAP3A	2	METAB	#N/A	#N/A	#N/A	#N/A	NA	13.3866	14.0366	13.5952	13.607	14.0969	14.1912	17.2824	13.0737	13.7002	14.2391	14.0922	13.3636	14.2492	13.8559	13.0765	14.3582	13.1369	14.126	13.9668	14.0026	13.2973	13.252	13.8216	13.204	13.6346	13.9475	13.9756	13.7437	13.4854	13.6452	13.8307	13.6216	12.3711	13.2838	13.5075	13.3812	13.9784	13.2424	13.499	13.6164	13.5166	13.8323
SNAPIN	not-sig	not-sig	#N/A	#N/A	#N/A	#N/A	NA	13.3471	13.7368	10.8656	13.797	14.1095	14.3367	12.2256	13.1407	13.1561	11.9376	12.1983	13.5542	11.5796	11.6972	13.1335	12.7191	14.6479	8.74489	12.4563	14.129	12.5095	13.443	11.7095	12.327	12.6312	12.8548	14.4089	12.9163	11.2975	12.4953	12.7898	12.9116	10.8859	11.7572	13.5461	11.8669	13.1559	13.1951	12.3604	12.0775	15.9148	11.945
CES1	1	EMT	0.57959	0.0358685	1.46132	0.0367949	NA	14.4025	11.5126	16.1885	14.4128	11.6106	16.1443	15.8158	13.1171	13.6578	13.4303	14.0366	13.5061	14.606	14.3067	11.7919	14.1388	15.2929	14.9679	13.364	14.6564	15.5157	14.2952	12.9351	13.8209	16.1358	17.1448	13.4809	12.8964	12.9471	14.5875	17.2649	13.2656	12.967	13.6165	14.6236	14.8194	14.112	13.6486	14.1081	15.1249	14.8981	14.8263
POLR2A	not-sig	not-sig	#N/A	#N/A	#N/A	#N/A	NA	13.1972	13.341	13.0548	13.3422	13.7041	12.7003	15.128	13.356	13.348	13.1339	13.5442	13.8496	11.8368	13.392	13.205	12.9749	13.4641	13.829	13.6681	12.8456	13.4173	13.5619	13.6694	13.846	13.4109	12.857	12.6926	12.9468	13.2026	13.4044	13.3549	13.2601	12.6512	13.2043	13.7115	13.6117	13.3614	13.2189	13.5062	13.0976	13.5688	14.3364
HLA-G	not-sig	not-sig	#N/A	#N/A	#N/A	#N/A	NA	16.9642	16.9115	17.2016	18.0246	16.9023	16.3801	18.4646	16.7418	17.4964	18.7631	17.3187	18.017	16.7552	15.0499	16.9587	17.798	16.5774	17.766	18.3117	17.5063	16.3827	17.6735	16.6179	17.7924	17.3848	16.4623	15.7277	17.9038	17.084	17.3189	17.1188	17.5031	17.1332	16.8262	17.8095	16.3211	16.4217	18.5873	17.5984	17.6507	17.9533	17.1521
COL6A2	1	EMT	0.394843	0.0471998	1.88927	0.0373453	NA	18.6908	17.3155	19.6178	19.5154	19.5103	18.8346	19.2607	20.365	17.4227	18.5898	19.0957	17.9587	19.9821	18.809	18.4793	18.3753	18.9139	20.0839	20.0018	18.3846	18.5905	20.3542	18.4673	17.9088	19.1059	17.5591	18.1384	18.0654	18.2033	18.9944	18.6659	18.5269	18.8182	18.406	18.1385	18.4765	19.9036	17.9927	18.5711	18.5747	19.5343	19.8139
B4GAT1	not-sig	not-sig	#N/A	#N/A	#N/A	#N/A	NA	12.5872	12.0878	11.0047	12.1218	11.8569	12.1415	12.524	11.6509	11.5757	11.6152	12.4984	11.0312	12.737	13.5106	11.8258	11.213	12.4743	12.2885	12.2718	12.4376	13.5374	12.4856	11.7308	11.8939	12.8841	13.2169	10.1455	12.1956	12.9552	11.1758	13.3466	12.2844	12.4319	13.2916	12.1937	12.1753	12.3525	12.5583	12.3281	12.2729	12.583	11.6918
RPL18A	not-sig	not-sig	#N/A	#N/A	#N/A	#N/A	NA	17.0107	16.8728	16.9984	16.8025	16.2693	16.6766	17.3767	17.4613	17.1009	17.0751	17.0856	16.8007	16.9905	16.9986	17.2948	17.0756	17.3327	16.8903	16.9359	16.8022	17.2	16.6262	17.0701	16.5631	17.4509	16.9838	16.8193	17.0638	17.3341	17.1824	16.9725	16.9169	17.6619	17.1003	17.1608	17.1115	17.2283	17.1408	17.0181	17.2057	16.8456	16.688
CARHSP1	not-sig	not-sig	#N/A	#N/A	#N/A	#N/A	NA	14.8858	14.6667	15.1025	14.5373	14.5369	14.4475	11.3448	14.4076	14.2908	15.1716	14.8842	14.3696	14.3141	14.3524	14.4217	14.5695	15.194	13.3314	14.5097	15.1465	15.0057	14.3437	14.8991	14.3778	14.6238	14.7215	14.7493	14.4723	14.493	14.8974	14.621	15.0327	15.4322	14.803	14.2559	14.7477	14.2172	13.8716	14.3883	14.4677	14.0075	14.2067
KLC1	not-sig	not-sig	#N/A	#N/A	#N/A	#N/A	NA	12.1225	12.6324	11.432	11.734	12.4219	11.6826	13.6925	11.8134	12.5254	12.392	12.3495	12.4716	11.6559	12.0145	12.191	10.9473	12.3063	13.3327	12.2883	12.2277	12.4032	12.8349	12.038	12.2557	12.1839	11.9092	12.0104	12.8025	11.9512	12.5623	12.3131	12.5562	12.765	13.3486	12.269	12.9829	12.1204	12.4662	12.2671	11.3896	12.927	13.323
AP4S1	not-sig	not-sig	#N/A	#N/A	#N/A	#N/A	NA	11.6901	11.7434	12.1787	11.9377	12.7318	11.0107	11.3302	12.3483	11.5579	11.4698	12.6604	11.7537	11.2867	12.1459	12.4697	11.1877	10.9338	10.9578	11.9186	11.401	12.4294	12.3686	12.6497	11.4406	11.9539	11.8193	11.5498	11.2107	11.4644	11.499	11.5174	11.7378	11.2903	11.4914	11.0348	12.2029	11.1525	10.95	11.1081	12.1869	12.1361	11.5862
PCF11	not-sig	not-sig	#N/A	#N/A	#N/A	#N/A	NA	14.5293	13.1085	14.4857	14.2308	14.6462	13.752	14.1562	12.697	14.3889	13.9695	14.0547	14.5108	15.1027	14.5855	14.202	13.6729	14.6341	14.3886	14.1606	13.9412	13.4225	15.6987	14.7195	13.8233	14.9098	13.7277	12.3313	13.8013	13.9932	14.5994	14.3733	14.7041	13.2278	12.0299	13.5791	13.4543	13.3415	12.3681	14.4442	14.7481	15.708	15.2221
EPS15	not-sig	not-sig	#N/A	#N/A	#N/A	#N/A	NA	14.2132	13.9781	13.5863	13.7388	13.4722	13.8354	12.4171	14.5321	12.4559	13.5557	13.893	13.7746	14.7544	12.7993	13.7759	14.1814	13.5546	14.0899	13.6459	13.9044	13.4105	14.5765	14.3028	13.9362	13.8294	13.5721	13.7915	14.0197	13.9738	13.5658	12.8127	14.0733	15.1262	13.8595	14.4731	13.298	13.5757	14.0163	13.4572	13.815	14.3932	13.4388
TMEM41B	not-sig	not-sig	#N/A	#N/A	#N/A	#N/A	NA	11.5565	11.8885	10.1151	11.7439	10.7423	9.3391	10.9369	9.18626	9.91974	11.3103	11.03	10.8927	10.9675	11.2243	10.4375	10.7002	10.9528	11.8276	10.2992	9.60026	10.0664	11.0048	10.9776	10.1901	11.2304	11.6964	11.9526	11.2275	10.5803	11.7159	11.7849	10.1227	11.8774	11.0319	11.7655	10.6919	10.7579	10.4328	11.2101	11.6319	10.5315	11.245
IGHV3OR16-12	not-sig	not-sig	#N/A	#N/A	#N/A	#N/A	NA	12.588	12.8902	13.7653	13.301	12.117	13.338	13.5041	14.5341	10.4402	12.4775	12.3927	12.8441	12.4521	13.7117	12.5225	13.8472	11.7469	12.9197	13.4408	13.1594	12.8351	13.321	12.1351	13.9408	11.7672	13.471	13.6373	13.1763	13.1027	13.1375	12.456	14.148	13.1594	14.0115	12.2204	13.3974	12.6351	14.7177	14.0444	14.1882	15.154	14.1529
WDR37	not-sig	not-sig	#N/A	#N/A	#N/A	#N/A	NA	13.1286	13.1404	13.2188	11.5052	11.6606	13.0374	12.4056	13.4901	14.0101	13.6288	13.5173	13.7973	14.2089	13.4384	12.9663	13.0401	12.2116	11.8828	14.571	13.416	12.917	12.804	14.0305	14.9428	10.9954	12.3171	11.9803	12.8959	12.563	12.0368	13.0958	14.3046	12.3968	13.7632	13.1504	12.1748	12.7141	14.1868	13.8775	11.7969	14.7051	14.4711
SNX12	2	METAB	#N/A	#N/A	#N/A	#N/A	NA	14.7185	13.5455	13.74	14.1007	13.1058	13.9217	16.8714	13.6438	13.5553	14.1258	13.3259	13.6037	13.2307	13.4315	13.0733	13.7795	13.4769	14.7342	13.5386	14.1765	14.0899	13.2492	13.7799	12.9225	13.0256	13.7284	14.0399	13.0864	13.0954	13.6633	13.8417	13.7468	15.0458	13.0969	13.0697	12.7362	13.3032	12.5006	13.3608	13.3569	12.7066	12.9362
GGH	2	METAB	#N/A	#N/A	#N/A	#N/A	NA	15.7328	15.4839	15.3016	15.712	15.0974	15.7033	16.8847	16.0703	15.1833	15.7289	14.1654	14.6346	15.3314	15.3284	13.6672	14.3137	15.1921	15.9065	15.0605	15.1841	14.6811	14.7282	15.6598	14.0034	15.1485	15.5451	15.1377	13.1997	13.8974	15.1392	15.1398	13.4102	14.2151	15.1558	14.2873	12.7591	16.2297	14.2021	14.3788	14.973	14.6551	14.2091
PPP1R18	1	EMT	0.374975	0.0566932	1.89554	0.0392499	YES	14.1788	11.3075	14.5352	14.4202	14.7911	14.212	14.1631	14.9087	13.6964	13.3116	13.8386	14.7483	12.8424	13.8375	14.6835	13.0002	13.9052	13.2334	14.4207	13.1661	13.5015	15.059	14.482	14.3854	14.0798	14.6406	11.6527	15.1831	14.6334	15.0679	13.9207	15.8709	12.7979	14.8564	13.6924	13.7529	15.2933	13.4752	14.6158	13.2996	14.0906	15.6445
FXN	not-sig	not-sig	#N/A	#N/A	#N/A	#N/A	NA	12.8965	13.3696	13.1978	12.615	12.5484	12.8515	11.9638	12.3409	12.0079	10.9739	13.2928	12.8825	12.0149	12.9308	12.6186	12.9854	13.1822	10.6041	12.8403	13.3396	12.454	13.3366	12.125	12.8526	12.553	12.6224	12.4254	12.5341	13.2244	13.1666	13.2413	11.9151	10.6485	12.8637	14.6782	13.0177	12.5006	11.8456	12.5568	12.3758	12.5091	12.3111
NSF	not-sig	not-sig	#N/A	#N/A	#N/A	#N/A	NA	16.2874	15.8015	15.6249	16.0483	16.1021	15.8677	18.9285	15.8555	15.9873	15.9222	15.6897	15.6956	15.4787	15.8402	15.6425	16.2216	15.9482	15.7092	15.4789	15.8567	15.9243	15.7588	15.785	15.9087	15.7557	16.0283	15.5051	15.8541	15.6305	15.9673	16.1651	15.8408	17.8686	15.8452	16.1951	15.4671	15.5283	15.7631	15.8139	16.1519	15.8923	15.9929
PI4KA	not-sig	not-sig	#N/A	#N/A	#N/A	#N/A	NA	13.4488	12.9703	13.5456	12.1527	12.3666	13.0443	12.2547	12.837	13.7442	12.398	12.8771	13.8232	13.0761	13.4828	12.42	12.7231	13.205	11.0046	13.2636	13.1341	13.1869	14.4251	13.0483	13.254	13.0718	13.5368	12.6356	12.7585	13.1629	11.9843	13.7132	13.6108	13.2148	12.9976	13.6174	12.8913	12.766	12.4179	13.2264	12.6207	13.2322	13.9148
HTRA2	not-sig	not-sig	#N/A	#N/A	#N/A	#N/A	NA	11.3572	14.9817	15.1192	14.4238	12.91	13.1521	10.2292	15.1204	13.1723	15.5646	15.3604	13.173	14.2604	13.3433	14.2971	11.7339	10.1178	15.8154	13.2156	13.4734	13.9402	15.3701	11.2613	10.256	14.5746	11.6754	13.444	15.1406	14.0821	15.1454	13.1503	15.0783	16.9099	11.2423	12.2446	13.7837	14.9126	9.20442	10.4706	10.4366	11.7766	13.4989
ALG2	not-sig	not-sig	#N/A	#N/A	#N/A	#N/A	NA	14.5356	14.9402	15.1054	14.5901	14.5841	14.6659	15.2419	15.4833	14.721	15.5468	14.3556	14.6052	15.8923	14.3407	14.8326	14.2561	14.758	15.663	14.63	14.4879	14.6655	14.8949	14.8285	14.7759	15.8785	14.4889	14.9375	14.1963	14.428	14.4847	14.6662	14.5279	13.1804	14.6381	15.7469	14.5482	15.7122	14.9707	14.4365	14.3913	15.2912	14.9999
CHP1	not-sig	not-sig	#N/A	#N/A	#N/A	#N/A	NA	14.6266	14.086	13.7888	13.7306	14.5714	13.6476	10.2755	13.184	12.7874	13.3413	14.0375	12.9294	13.5698	13.5801	13.9796	13.012	13.1294	11.1748	12.5648	13.4416	13.3219	13.4174	13.5421	13.7075	13.372	13.1283	13.091	13.0964	13.3077	13.1726	13.0368	13.277	12.5642	13.3201	13.2705	13.7711	13.3384	13.7431	13.3041	12.8709	13.3161	13.046
EIPR1	not-sig	not-sig	#N/A	#N/A	#N/A	#N/A	NA	12.6425	13.1699	12.5421	12.9474	11.4064	12.4132	12.4629	12.0201	11.5876	12.9951	12.6029	12.874	10.7331	13.0791	12.202	13.0454	11.8884	11.7961	11.9994	13.0843	11.9985	12.6795	13.1938	13.3282	13.2159	13.4023	13.6167	13.4175	12.3429	11.7916	13.2486	13.297	12.6935	13.4603	13.3418	11.2704	12.4886	12.7946	12.1033	13.3109	11.4869	11.252
NOP10	not-sig	not-sig	#N/A	#N/A	#N/A	#N/A	NA	13.3163	13.3768	12.8639	13.2215	13.2261	13.6587	20.0178	12.2313	12.9207	12.7795	13.6179	12.4605	13.3469	12.6683	12.4972	13.2192	12.4167	10.0099	12.3305	13.3149	13.1411	12.3769	11.955	12.434	13.1126	13.4144	13.202	12.7084	12.3256	12.9634	13.3744	12.2797	10.9581	12.0266	13.8085	13.2287	13.1498	11.7355	12.5987	12.8742	14.3347	12.058
RRP1B	not-sig	not-sig	#N/A	#N/A	#N/A	#N/A	NA	12.9097	13.0474	13.5374	12.8938	13.2682	13.1761	12.1024	13.5407	13.8326	11.6922	13.7399	14.1187	12.9613	12.5072	13.8959	13.0561	13.8221	13.5258	12.6937	12.3178	13.4953	13.6477	13.8361	13.342	13.0215	13.8144	13.5543	13.8528	14.0406	14.5245	14.3442	13.4686	12.3102	13.2863	13.6639	13.9784	13.8215	14.5239	13.4518	13.5951	13.1683	12.9452
AGPS	not-sig	not-sig	#N/A	#N/A	#N/A	#N/A	NA	14.2344	13.9965	13.8192	13.504	14.6397	13.9868	15.4937	13.8754	13.8271	13.6626	13.8971	13.9432	13.8025	13.8749	13.9408	14.1588	14.0105	14.2574	13.991	13.6086	14.0271	13.0161	13.8648	14.0988	14.4484	14.5565	12.8123	13.4444	14.1163	13.2373	13.9187	13.7985	16.2808	13.444	13.5012	14.2972	14.1288	13.7804	13.8537	13.7169	13.8939	14.0335
GTF3C1	not-sig	not-sig	#N/A	#N/A	#N/A	#N/A	NA	13.4099	14.0639	14.0256	13.689	14.1837	13.7575	12.0079	13.5402	13.6722	13.4755	13.5913	13.4647	13.4001	13.7328	13.6286	13.6351	13.9241	12.3059	13.5952	13.9272	13.6887	13.662	13.755	13.9342	13.8429	14.377	14.1188	13.931	13.6093	13.6975	13.779	13.7151	13.1591	14.0233	13.9419	14.1939	13.5372	14.6487	13.8418	13.8168	12.5762	13.1815
AKT1S1	not-sig	not-sig	#N/A	#N/A	#N/A	#N/A	NA	13.8298	13.5487	14.6854	13.6451	14.2204	14.099	13.7916	12.3358	14.6746	13.2644	13.9934	14.2607	15.263	14.1033	13.6122	13.442	13.3125	15.945	13.6792	14.147	14.1347	13.0138	14.2302	13.491	14.1293	13.0411	13.8636	13.2338	14.3436	14.291	13.8191	14.3062	13.0737	12.2491	11.8334	13.4713	10.7611	11.9595	13.8989	14.3353	11.5374	14.7831
STT3A	not-sig	not-sig	#N/A	#N/A	#N/A	#N/A	NA	15.2299	14.6981	15.3222	14.6474	14.3153	14.1735	16.4112	15.3984	14.5308	15.6153	14.8095	15.1687	15.4826	14.9442	14.8337	14.6392	15.1313	15.199	14.2714	14.9435	14.9248	14.7653	15.3827	14.9765	15.435	14.7789	14.2372	15.099	15.1594	15.3984	15.5935	15.6271	14.7265	15.3909	14.893	15.4257	15.5189	15.2457	14.6068	16.0757	15.6253	15.5926
CFL1	not-sig	not-sig	#N/A	#N/A	#N/A	#N/A	NA	18.3531	18.9923	18.8099	18.624	18.0875	19.3006	19.3891	18.4293	18.667	19.1222	18.809	18.3395	19.2193	18.7763	18.3189	18.7544	18.4498	19.5678	18.869	19.1703	18.6835	18.3902	18.7149	18.3389	19.1545	18.836	19.7009	18.6973	18.6507	18.0197	18.401	18.6808	19.2978	18.4625	18.29	18.9126	18.6036	18.9103	18.5749	18.7745	18.6988	18.1304
MAP1B	not-sig	not-sig	#N/A	#N/A	#N/A	#N/A	NA	12.3697	16.2878	12.0408	16.4325	13.6317	12.7813	13.2256	12.3356	11.7499	13.1155	13.1915	12.3843	12.4348	11.9841	14.737	11.773	12.3433	13.4872	12.1898	12.0528	14.3355	13.1434	11.8036	11.9933	12.3261	12.1045	17.073	13.7995	13.5629	12.1296	13.593	12.3009	14.2621	12.18	11.299	16.1502	12.5633	13.6763	14.1434	15.7872	13.0321	12.8952
THRAP3	not-sig	not-sig	#N/A	#N/A	#N/A	#N/A	NA	15.5252	15.3193	15.5734	15.3685	15.5781	15.3825	12.2792	15.0259	15.6335	15.207	15.4805	15.6716	14.7681	15.2757	15.8395	15.4793	15.6469	14.4117	15.4481	15.4512	15.7631	15.4827	15.6967	15.6911	15.8434	15.6813	15.3233	15.5997	15.818	15.7745	15.8443	15.6292	15.9732	15.5583	15.576	15.8256	15.7809	15.4836	15.6379	15.5773	15.5136	15.5786
PAF1	not-sig	not-sig	#N/A	#N/A	#N/A	#N/A	NA	14.3189	14.3679	14.3941	14.5468	14.8986	14.0006	13.1033	14.1785	14.2852	13.9501	14.44	14.2636	14.2894	14.0807	14.5652	14.2464	14.4107	13.2439	14.5803	14.2782	14.8256	14.6172	14.6843	14.3995	14.7324	14.2267	14.8678	14.1714	14.4906	14.4113	14.155	14.4552	13.55	14.2317	14.4291	15.0469	14.0599	15.233	13.7714	14.3316	13.9253	14.4549
RBM47	not-sig	not-sig	#N/A	#N/A	#N/A	#N/A	NA	13.5401	14.0655	14.0449	14.1108	14.1523	14.433	16.5498	14.0867	14.1502	14.0058	13.8526	14.2153	13.2229	14.0028	14.1879	13.9964	14.3516	14.2452	13.1455	13.9872	13.9044	13.6279	15.0191	14.2978	13.8212	14.3599	14.346	13.7293	14.2512	13.7325	14.3277	13.8556	13.2285	14.2173	14.2291	14.1877	14.3364	14.5487	14.2665	14.1072	13.9713	13.85
AOC3	1	EMT	0.586637	0.0648366	1.47495	0.0417404	YES	15.1094	14.7461	15.4813	15.429	14.1815	14.9353	17.7912	16.7668	14.9016	14.9936	14.8806	13.4363	17.6568	15.7376	15.2083	15.7081	13.8072	17.9318	15.1047	15.8722	14.4619	14.9707	14.3468	14.1524	15.1886	13.931	14.1981	13.9271	14.555	14.699	14.7812	16.8835	15.3127	15.5435	14.4845	13.5382	15.6543	14.1056	15.9682	15.4356	16.8668	17.6549
CMTR2	not-sig	not-sig	#N/A	#N/A	#N/A	#N/A	NA	10.9853	11.0774	11.6875	11.7722	13.1329	13.0035	15.0978	15.3234	12.9672	13.5304	12.7445	11.7833	12.0977	12.9587	13.2788	11.6257	11.0639	13.6903	12.4269	13.8691	13.9662	12.229	14.6786	13.6511	11.5963	16.1811	15.6704	10.9337	12.794	10.9093	11.3408	14.026	14.3391	11.1825	12.0532	13.3196	12.7683	13.3092	15.5671	13.119	15.234	11.5303
VPS50	not-sig	not-sig	#N/A	#N/A	#N/A	#N/A	NA	12.639	13.2125	14.0328	13.3605	13.423	13.4073	13.8039	13.0322	11.9048	13.7267	13.7114	13.2055	13.696	13.7629	13.0031	13.7012	13.8501	15.2986	13.5688	14.062	13.5173	12.6865	14.2226	13.3357	12.5912	13.4617	13.9651	13.368	14.3667	13.9575	13.7156	13.8871	14.389	15.1518	12.8385	13.2539	13.9013	12.4989	14.2075	14.9285	12.8941	13.8442
HNRNPA3	not-sig	not-sig	#N/A	#N/A	#N/A	#N/A	NA	15.4983	16.2004	16.3425	15.1583	15.6144	16.6787	17.3423	15.5357	15.8534	15.9762	16.6126	15.793	16.3686	15.4017	15.4384	15.9698	15.5866	16.9287	16.0639	16.1047	16.1878	15.6629	15.538	15.7012	16.4525	16.3377	16.3002	16.0809	16.1392	15.8775	16.2665	16.1719	15.609	16.0522	16.4957	16.2753	16.1102	16.1902	15.425	16.1658	15.4363	15.4752
ASCC2	not-sig	not-sig	#N/A	#N/A	#N/A	#N/A	NA	14.0568	13.9593	13.9952	13.4196	14.159	13.4986	14.4014	13.3962	13.929	13.8449	14.1129	13.8191	13.7776	13.5802	13.6582	13.1519	13.6208	12.5828	13.3661	13.6695	14.1916	11.5235	14.2419	13.9438	13.8712	13.8396	12.2051	13.7064	13.6761	14.2639	13.7117	14.1207	14.9122	14.057	14.6113	14.0302	13.8922	14.2205	13.3643	13.7931	13.712	14.4263
WIPI1	not-sig	not-sig	#N/A	#N/A	#N/A	#N/A	NA	11.776	12.1436	12.4836	11.4771	11.5922	12.9116	11.8471	12.167	12.6769	12.047	12.271	11.5412	13.1782	11.7883	10.9872	12.2749	11.1055	12.4323	11.4403	12.1957	11.9457	12.0178	11.5966	11.9781	12.3156	11.8607	7.16639	11.698	11.3211	11.0971	12.0718	11.7906	11.3751	12.3382	12.5003	11.678	12.1231	11.7023	11.8291	12.6024	12.4013	12.4957
OSBPL8	not-sig	not-sig	#N/A	#N/A	#N/A	#N/A	NA	14.4388	14.2118	14.3067	14.2815	15.0874	14.3754	16.379	14.5831	14.8545	14.6078	14.3813	14.4151	15.1093	14.4151	14.6671	14.2959	14.2985	15.0819	14.1916	14.2714	14.5386	14.9824	14.6785	14.4579	14.3085	14.2816	14.3665	14.4621	14.2792	14.6469	14.4971	14.7185	14.8006	14.5199	14.766	14.4166	14.3761	14.8146	14.0425	14.5029	14.5629	14.1778
PRXL2A	2	METAB	#N/A	#N/A	#N/A	#N/A	NA	14.2822	14.9749	14.2793	14.1488	13.672	14.4157	16	13.8665	15.3948	15.0877	14.1836	14.1413	17.6692	14.1012	13.4526	14.0916	14.4183	15.6889	13.9902	14.3682	13.7766	14.581	14.8081	14.4797	14.5577	14.6358	16.0354	14.4162	13.1354	15.0164	14.4694	14.3968	14.4917	13.9711	14.3303	14.4391	14.7457	15.0635	14.8591	14.9639	14.3989	14.2836
ZC3H15	not-sig	not-sig	#N/A	#N/A	#N/A	#N/A	NA	13.9219	15.2077	14.6662	13.6848	14.3944	14.5798	15.6838	14.6565	13.7641	13.1893	15.0478	13.6218	15.0268	13.8552	14.486	14.3081	14.5116	15.446	14.504	14.7351	14.8957	13.5551	14.0363	14.8821	15.7294	14.9864	15.3011	14.5264	14.6152	14.0885	14.5736	14.1195	14.7645	14.3721	14.2133	14.6372	14.7946	14.8378	13.8235	14.5912	12.2169	14.2974
TPRN	not-sig	not-sig	#N/A	#N/A	#N/A	#N/A	NA	12.5658	11.4444	12.6209	12.745	13.1499	12.7331	14.0301	12.8228	12.2941	11.0307	11.2792	12.8367	11.7347	13.1319	13.0299	13.5325	13.8006	11.5205	12.8188	13.2967	12.8044	12.6103	13.2768	12.8329	12.2186	13.046	12.6535	11.875	13.0962	13.4104	13.3748	13.3175	12.1562	12.69	12.8474	13.4438	12.6354	12.7389	12.2508	11.7585	14.2518	14.1719
RCC1	not-sig	not-sig	#N/A	#N/A	#N/A	#N/A	NA	13.3125	13.9573	13.8468	14.3495	14.6078	13.2851	16.8146	13.792	13.7724	13.459	13.8317	13.245	13.6866	13.4182	14.1992	13.6039	13.7872	14.3725	13.3506	13.3629	14.0939	13.69	13.8135	13.6384	13.7049	14.0523	13.906	13.7465	13.9934	13.8614	13.887	13.3023	14.7078	13.5454	13.7318	14.3093	13.724	13.7966	13.4143	13.7381	13.8599	13.8545
VPS16	not-sig	not-sig	#N/A	#N/A	#N/A	#N/A	NA	13.878	13.4822	12.9851	13.362	13.0925	12.8642	11.3319	13.4289	12.6719	13.2303	13.8982	13.7426	13.6262	13.6747	13.3127	13.1493	13.6623	13.938	13.5189	12.8707	13.7875	13.4911	13.5185	13.6101	13.5944	13.1965	13.0612	13.7822	13.3414	13.9973	13.7429	13.6015	12.5975	14.3931	14.2549	13.0672	14.0432	13.6617	12.9282	13.2986	13.926	13.6272
HEATR5A	not-sig	not-sig	#N/A	#N/A	#N/A	#N/A	NA	12.9339	13.1891	13.6642	13.2996	12.2867	13.1276	10.8726	13.3756	12.4286	13.843	13.3047	12.9276	13.8763	13.8257	13.4466	14.0662	12.8192	13.3393	14.3258	14.5394	14.3019	12.5105	13.778	13.2719	13.3019	13.713	13.005	13.8544	13.6775	11.3454	14.1424	13.5677	13.6755	13.3599	12.8264	12.7971	13.095	13.7156	12.8562	14.1749	12.2856	13.3426
PALLD	1	EMT	0.315085	0.0594652	2.1953	0.042522	NA	15.8482	14.2648	15.2855	15.7928	14.513	15.2951	15.0565	15.3029	15.2569	15.2107	15.7685	15.6964	16.5043	14.7329	15.2591	14.5465	14.2905	15.5525	15.5768	15.0343	15.4016	16.2628	14.801	15.4248	15.3365	14.571	15.4644	15.5383	16.0668	15.1762	14.3034	17.2856	14.6101	15.3083	14.3637	15.7456	15.7991	15.7859	15.8469	15.9114	15.9295	16.0618
WAS	not-sig	not-sig	#N/A	#N/A	#N/A	#N/A	NA	13.3421	12.1068	12.9204	11.4612	13.8566	13.2208	13.671	12.265	12.0432	13.3349	12.7878	13.1689	12.4397	13.0692	12.4598	12.871	12.9566	14.3171	13.8417	12.2632	14.1284	14.3133	12.6129	12.6977	13.1864	11.6217	13.2993	13.1508	12.9293	14.0038	12.1055	13.8627	13.0853	13.1089	12.8969	11.4312	13.0501	11.736	12.6327	14.3479	15.0221	15.1948
PGRMC1	not-sig	not-sig	#N/A	#N/A	#N/A	#N/A	NA	16.3077	16.4053	15.9182	16.4654	16.0225	15.8005	17.5269	15.5695	15.9666	15.8489	15.4185	15.3447	16.0168	15.0405	14.8528	15.3976	15.7559	16.5638	14.7622	15.2748	15.3499	15.0466	15.6341	14.8617	15.9836	16.5629	18.1473	14.4313	14.6795	15.6823	15.9101	14.9831	17.3164	15.038	14.977	15.1179	15.4393	16.1079	15.7195	16.0477	16.0797	16.4052
ITIH1	not-sig	not-sig	#N/A	#N/A	#N/A	#N/A	NA	13.5752	14.0851	13.2936	13.1193	14.3985	13.2179	16.7651	13.8448	13.9127	13.1854	13.3884	13.5287	14.069	13.4902	13.3116	13.1781	13.4593	15.1933	13.4581	13.3229	13.2705	13.954	12.7303	13.8667	13.7384	12.9176	13.6308	13.7302	13.6099	13.71	12.5157	13.1376	14.3175	13.7501	12.8101	13.3918	13.8906	13.543	13.8074	13.2384	14.2539	14.2296
NRDC	not-sig	not-sig	#N/A	#N/A	#N/A	#N/A	NA	14.0204	14.7069	14.5748	14.3172	13.6903	14.066	12.9493	14.0551	14.432	13.8982	14.3109	14.3701	13.6256	14.978	14.9213	14.8221	15.4203	13.2615	14.5697	14.5459	14.6835	14.382	14.8198	14.444	14.9705	15.1467	13.7796	14.293	14.2927	14.428	14.3406	14.8137	13.6629	14.4846	14.1775	14.4487	14.4195	14.4706	14.449	15.0258	14.5057	14.4128
SEC61A1	not-sig	not-sig	#N/A	#N/A	#N/A	#N/A	NA	14.5339	13.7748	14.2265	13.7151	14.0089	14.8409	17.2624	14.9075	14.3128	14.2948	14.4858	14.5055	15.1294	13.8972	14.2372	14.6041	14.451	14.9266	14.3066	14.2871	14.2903	14.4039	14.0242	14.3529	14.2303	13.899	13.6328	14.3134	14.4853	14.4274	14.3381	15.0667	13.6615	14.5174	14.181	14.1843	14.5171	13.8743	14.5402	14.5739	14.3559	14.0975
NBAS	not-sig	not-sig	#N/A	#N/A	#N/A	#N/A	NA	13.9609	13.9756	13.6259	13.78	13.0681	14.3965	12.5628	13.7752	13.5029	14.0296	14.0669	14.4935	14.1313	14.0721	13.5483	13.811	14.1081	14.1185	13.8753	14.1485	13.6688	13.5648	14.0172	14.4381	13.9168	14.5754	13.1025	14.359	13.8929	14.1677	13.5534	13.6096	12.8545	14.2296	14.0976	13.788	13.7258	13.8224	14.3201	13.4067	13.9569	14.1798
PPP1R9B	1	EMT	0.758158	0.0300899	1.42983	0.0432447	NA	17.0966	14.5021	16.7287	17.4037	17.8839	16.1438	13.5599	17.5232	16.879	15.4237	16.3715	16.1483	15.2455	16.4741	16.063	15.9226	16.2112	9.53321	17.4764	16.1489	17.248	18.1085	15.686	16.7031	16.054	16.2791	16.9426	17.9278	17.1708	16.3318	18.2937	19.2355	16.2928	17.4041	15.9066	16.4425	17.7095	17.7486	16.1651	17.0646	17.8145	17.8979
DERL1	not-sig	not-sig	#N/A	#N/A	#N/A	#N/A	NA	15.4841	15.0048	14.2296	14.9157	14.2943	14.1435	13.758	14.0959	15.0794	14.1535	14.4096	15.4334	14.7568	15.504	15.2063	14.373	14.514	14.828	14.7409	14.805	14.6158	14.605	12.7243	15.3106	15.2072	14.636	13.9076	14.5574	13.8726	14.8975	14.2763	15.4148	14.6084	15.155	14.8671	14.7914	14.0555	14.5466	14.6525	14.3385	15.0286	14.7968
GPAA1	not-sig	not-sig	#N/A	#N/A	#N/A	#N/A	NA	14.4891	15.282	14.3868	14.9746	14.717	15.2621	13.1086	15.0678	14.4858	15.3865	15.409	14.7473	14.5695	14.4767	15.0418	14.5113	14.5012	12.7629	14.8194	15.1191	15.2513	15.0439	14.3123	14.8946	15.2482	15.0583	14.6438	14.6559	14.6646	14.2477	14.5294	14.5429	15.7778	15.1491	14.6726	15.2274	14.442	14.9819	14.6	15.2827	14.9004	14.6768
MORC3	not-sig	not-sig	#N/A	#N/A	#N/A	#N/A	NA	13.2915	13.3749	14.1663	14.1104	15.0189	14.229	13.3572	13.4651	14.0917	14.5411	13.6237	14.3203	13.5585	13.9446	14.7603	14.1917	14.1405	16.0239	14.3589	14.2056	13.604	12.5113	12.8001	14.2109	14.0299	13.5871	11.1546	14.4578	14.7168	13.8314	13.8557	14.0324	16.5588	14.4631	13.3898	13.8793	14.1594	15.0478	14.6008	13.9409	14.3946	14.1517
RSRC2	not-sig	not-sig	#N/A	#N/A	#N/A	#N/A	NA	13.8791	12.3056	13.3257	13.7895	12.2758	13.2316	13.2421	13.9405	13.7824	13.0896	12.8323	13.7732	12.4327	12.7884	13.3421	13.125	13.5855	11.2193	13.5614	12.9538	13.2993	14.0835	13.3271	13.1602	13.4069	13.0531	13.1106	13.6465	14.1053	14.2977	13.2074	13.5327	13.3987	12.2296	13.9567	14.1834	13.4245	14.0265	13.4618	14.0441	14.3581	14.7655
TAP1	not-sig	not-sig	#N/A	#N/A	#N/A	#N/A	NA	14.2497	13.1843	13.6795	13.417	12.7864	13.3503	11.9516	13.5219	13.623	15.1458	13.815	14.3237	14.4012	14.1667	14.7084	14.4137	13.4128	14.8828	14.6674	13.5566	13.3479	14.6057	13.9398	13.9172	14.2448	13.49	13.9361	15.4724	14.2176	13.4876	13.7281	14.1196	14.2561	15.1399	14.0412	13.7253	14.4173	14.5367	14.1035	14.4337	14.1662	13.9905
PCYOX1	not-sig	not-sig	#N/A	#N/A	#N/A	#N/A	NA	15.2825	15.1221	15.0082	14.8311	15.9899	14.8985	15.0914	15.4407	14.9758	16.0426	15.4378	14.6074	15.9953	14.8217	14.9073	14.8733	14.4298	15.598	14.9553	14.9986	15.3033	15.0916	14.3977	15.1486	15.4256	15.6538	14.8319	15.2126	14.9677	15.1154	15.3011	15.0552	14.4494	14.8393	15.2365	14.6112	14.8229	14.5942	14.6813	15.1479	15.1511	15.3823
IK	not-sig	not-sig	#N/A	#N/A	#N/A	#N/A	NA	14.7264	15.315	15.4032	14.9993	15.1466	15.432	12.6791	14.5786	15.3171	15.3477	15.3234	15.3822	15.0894	14.9915	15.329	15.0839	15.3565	13.7262	15.4686	15.1091	15.3834	15.0264	14.9065	15.0328	15.4895	15.3244	14.9474	14.9927	15.1997	15.2336	15.1448	14.7214	15.1815	14.7496	15.2357	15.3823	14.7163	14.4024	14.7329	14.7781	15.0842	14.7366
PSMB1	not-sig	not-sig	#N/A	#N/A	#N/A	#N/A	NA	16.4456	16.5628	16.2068	16.0371	15.6553	16.7971	16.6606	15.6105	16.2992	16.6133	16.6616	16.6217	16.2066	16.612	16.6988	16.2268	16.727	17.0314	16.8239	16.5298	16.2968	16.4663	16.3259	16.4484	16.3827	16.51	16.15	17.1781	16.7191	16.8994	16.2267	16.1398	17.0449	16.4008	16.6776	16.3463	16.5468	16.4361	16.2283	15.6106	15.9864	15.9632
HLA-A	not-sig	not-sig	#N/A	#N/A	#N/A	#N/A	NA	15.691	17.9863	16.2062	16.6617	16.4888	17.2962	18.0621	16.3718	17.4222	18.4118	16.8337	16.3907	17.7873	17.3284	16.3432	17.1417	16.3629	19.5916	16.732	16.7234	17.0869	18.4742	17.4	17.2094	17.5091	15.2139	18.3526	18.0593	16.652	18.6794	16.4172	16.9352	17.526	18.4491	16.7938	16.5259	17.5023	17.5851	17.8166	18.8932	16.9181	17.5833
TUBGCP2	not-sig	not-sig	#N/A	#N/A	#N/A	#N/A	NA	13.4648	12.7977	13.1138	14.2662	13.2994	13.6941	13.8892	13.7024	13.92	14.1102	13.2073	13.026	13.5813	11.8579	12.6357	13.4641	13.0667	15.624	13.1712	13.7325	12.7952	13.0975	13.923	14.0133	13.2722	12.8343	15.194	12.5473	12.9917	12.3252	13.5659	12.8948	12.9004	13.1962	12.3459	13.3344	14.2105	13.7863	13.5205	13.4039	12.7468	13.1986
CYP27A1	not-sig	not-sig	#N/A	#N/A	#N/A	#N/A	NA	15.3774	12.9092	15.0363	14.4022	11.6417	15.0798	16.8118	14.3974	13.0101	15.3643	14.3994	13.2166	13.6309	12.9938	12.4869	14.5183	15.2994	12.9198	12.7448	14.6778	13.2172	11.7436	13.6588	13.3154	12.8949	15.7507	14.8395	15.515	12.4171	14.6661	14.6986	13.5936	13.8653	13.9212	11.7543	12.2985	14.0412	13.4742	12.9542	15.4617	13.4153	13.5371
LSM7	not-sig	not-sig	#N/A	#N/A	#N/A	#N/A	NA	13.2389	12.2115	12.9968	12.7333	13.2051	13.7758	12.538	12.1906	13.257	13.5389	13.1188	12.7908	11.7634	12.5208	13.3092	12.8888	13.3959	13.6031	13.102	13.9609	13.3901	12.3326	13.3289	13.1598	12.5375	13.592	14.8758	13.5097	13.0709	13.3926	13.7286	12.7464	15.9795	13.9893	13.8499	14.171	12.3019	12.8343	13.0002	13.3635	13.8028	12.0452
LEO1	not-sig	not-sig	#N/A	#N/A	#N/A	#N/A	NA	12.9593	13.1527	13.0113	11.0762	13.6776	12.7712	12.3242	11.2527	13.4304	13.1817	11.6369	13.0198	12.6664	12.9121	11.5351	12.5146	12.6877	13.3879	13.2396	12.8622	12.925	12.7404	12.3414	13.0612	13.6033	12.766	12.3558	12.4597	13.3327	10.9026	12.0854	13.0806	12.1336	12.3591	12.4034	13.496	13.3237	13.3315	13.225	11.7183	11.2573	11.1944
UGGT2	not-sig	not-sig	#N/A	#N/A	#N/A	#N/A	NA	13.1425	12.8554	11.6269	12.6651	12.4022	11.1069	12.4665	12.2345	12.1477	13.2659	11.9708	11.9082	12.7554	11.9252	12.6414	11.8594	11.9192	10.5647	11.4181	12.3757	12.3933	11.6875	11.2608	12.5085	11.1741	11.8889	11.1937	11.1585	11.925	13.5078	11.0868	12.4511	12.7281	11.2749	12.5281	12.2832	11.8519	12.9771	11.6647	12.8479	12.0505	12.4225
NOP14	not-sig	not-sig	#N/A	#N/A	#N/A	#N/A	NA	12.7894	12.3372	12.7904	12.578	12.154	13.1135	14.0879	11.6639	13.1418	13.4031	13.2373	12.9656	13.7384	13.6955	13.1379	12.8194	12.5529	11.1764	13.2175	11.7561	11.9952	10.3531	13.2404	13.2054	13.0414	12.3652	12.2145	13.0106	13.0504	12.9175	12.5244	12.0026	13.4452	12.3165	12.5077	13.0953	13.9411	11.1949	12.4831	11.9194	13.5138	12.2732
YBX3	not-sig	not-sig	#N/A	#N/A	#N/A	#N/A	NA	13.9586	13.3138	14.5914	14.2015	14.4313	13.3486	13.1882	13.064	14.8002	14.352	14.3798	14.9807	14.0208	14.1722	14.721	14.4288	14.6915	12.0191	15.039	14.3083	14.2216	14.6873	14.5687	14.9159	15.1631	14.3801	14.8412	14.6201	15.1491	14.066	14.5943	14.5306	15.0668	14.4537	14.5666	14.6391	14.3942	14.1275	14.49	14.0236	14.9226	14.1032
SSR3	not-sig	not-sig	#N/A	#N/A	#N/A	#N/A	NA	14.9441	15.5516	14.9262	14.9009	15.8087	14.6262	12.9377	15.4016	15.4844	16.511	15.3769	16.1235	16.1886	15.7258	15.1418	15.3937	15.648	15.9973	15.6185	16.1061	14.6431	15.1337	15.9317	16.2822	16.1848	15.5173	15.5658	15.4503	15.4796	15.7998	15.8445	15.1622	14.9694	15.6065	15.5759	15.6731	16.0807	15.2202	15.1105	15.1343	16.025	15.9586
PDLIM3	1	EMT	0.390205	0.0721973	1.77619	0.0454351	NA	13.9929	11.8585	14.3305	14.7916	12.0789	13.9056	16.3306	14.1454	14.0408	14.8164	15.106	13.1935	16.3278	14.0661	12.1993	13.6136	13.0643	16.5915	14.8429	15.0044	13.877	14.5402	13.1241	13.7676	13.7472	13.2138	13.1859	12.7667	14.1838	14.0652	12.9309	15.7459	15.0474	14.4328	12.2159	13.7487	14.6858	13.4194	14.5336	14.6542	15.4101	15.8748
RAD23A	not-sig	not-sig	#N/A	#N/A	#N/A	#N/A	NA	12.8405	13.1942	12.511	12.5552	12.8063	12.9942	16.6775	12.2179	12.464	13.4214	13.0068	12.9335	13.0022	12.4609	12.9998	12.7687	12.9112	14.1685	12.7676	12.7723	12.5582	12.7508	13.0455	13.0967	13.2547	13.0096	13.0725	13	13.0935	13.0784	12.6522	12.5778	13.6614	13.0599	12.8503	12.8593	13.6862	13.5037	12.7856	12.4693	13.2072	13.0316
VDAC2	not-sig	not-sig	#N/A	#N/A	#N/A	#N/A	NA	17.6615	17.4804	17.2898	18.0834	18.819	18.0871	17.8866	17.7823	17.7833	17.7242	17.4426	17.5068	19.301	17.6265	17.8517	17.9757	17.6616	16.579	17.685	17.4347	17.2729	17.5266	17.4888	17.5151	17.1285	17.9057	17.6348	17.2908	17.6048	17.7612	17.5145	17.6774	18.035	17.3202	18.069	17.3444	16.8649	17.295	17.436	17.6837	17.2149	17.0632
TRAPPC11	not-sig	not-sig	#N/A	#N/A	#N/A	#N/A	NA	13.5648	13.3133	11.7209	13.5768	12.0204	13.0308	13.5544	13.2574	13.9686	12.7193	13.5807	12.6524	12.8031	13.6454	12.8722	13.3014	13.1711	14.2431	13.2774	13.1445	13.244	13.1785	13.2332	13.4131	12.6061	13.1094	13.2036	12.8305	12.9843	13.9301	13.0553	12.9411	15.2451	13.2083	12.4882	12.6871	11.4147	12.521	12.9158	13.8604	12.3544	12.742
USP8	not-sig	not-sig	#N/A	#N/A	#N/A	#N/A	NA	14.0053	14.0537	13.7355	13.5949	14.1052	13.031	13.2868	13.453	13.912	13.6319	13.3264	13.4058	12.8108	13.5894	13.6491	13.8888	13.6709	13.5174	13.7926	13.4952	13.4854	14.401	13.3962	13.8438	13.6816	13.8536	14.1953	13.5476	13.667	13.4668	13.5204	13.4523	12.51	13.1829	12.7535	13.6634	12.9243	12.7264	13.4153	13.2216	12.3578	13.2475
EXOSC1	not-sig	not-sig	#N/A	#N/A	#N/A	#N/A	NA	12.8784	11.2616	11.7341	12.0075	12.5295	11.7301	12.3913	11.8464	12.706	11.4493	11.6196	12.1265	9.99439	12.2625	12.3622	11.9677	11.9966	11.987	12.464	11.7071	12.9218	12.9285	11.5205	11.9843	12.1732	12.1948	11.2341	11.8532	12.9464	12.6595	12.2099	12.6822	11.7466	12.25	13.3633	11.8654	11.7848	12.0171	12.8581	11.4094	13.1988	12.1471
AAMP	not-sig	not-sig	#N/A	#N/A	#N/A	#N/A	NA	11.6945	11.6361	12.1635	11.9214	11.5688	11.9938	12.8711	11.5023	11.9131	11.5034	11.7934	11.884	10.1491	11.7772	11.4334	12.806	12.5415	10.6833	12.3445	10.7176	12.6221	12.8612	12.37	12.2794	10.5378	12.9231	12.9414	12.5194	12.6463	11.8877	12.5735	12.1095	11.3609	12.5922	13.5475	12.8818	12.681	12.1855	12.874	11.8943	12.756	12.1452
RPS20	not-sig	not-sig	#N/A	#N/A	#N/A	#N/A	NA	15.3033	15.4968	15.0826	14.8036	15.5566	15.0577	15.118	14.96	15.0872	13.6299	15.6472	15.971	15.8049	14.7292	15.157	15.0872	15.1926	13.6414	15.9321	15.437	15.4788	15.7444	15.5191	15.9115	16.052	15.2525	15.7823	15.2779	15.9901	14.8828	15.3533	15.2473	14.6791	15.4726	15.9399	15.6703	16.178	15.4716	15.2913	15.6233	15.1504	15.3644
CPS1	not-sig	not-sig	#N/A	#N/A	#N/A	#N/A	NA	11.8906	16.3682	13.2777	9.36851	14.0656	12.2725	18.3813	12.5306	14.3832	13.0379	12.2769	12.6538	18.3846	14.067	12.6339	14.5097	13.6386	13.0405	14.2262	13.8375	12.6108	13.5826	10.6937	13.9955	14.2979	13.0148	11.6573	13.8682	13.1712	14.6262	13.5323	14.3163	12.2737	14.3737	11.6813	11.8757	14.637	14.2803	13.9286	11.2237	15.866	15.2795
PSMC3	1	EMT	0.436092	0.0821315	1.63236	0.0466585	NA	16.6927	15.1384	16.5162	16.3036	17.3925	16.239	16.5858	16.574	15.9476	16.8433	14.775	15.5897	17.1004	15.9472	16.3971	15.8558	16.1233	18.9013	16.9044	16.4379	15.5406	16.2998	15.4257	16.0951	16.7346	15.232	15.5697	17.0518	16.539	17.0673	16.9289	18.8238	17.1136	15.7834	15.9067	15.9168	17.4289	16.1979	15.464	15.3315	17.212	16.4338
COX11	not-sig	not-sig	#N/A	#N/A	#N/A	#N/A	NA	11.2708	12.5762	12.0868	11.1698	11.3866	12.5662	10.5505	12.0445	12.0188	12.8867	12.4033	11.0476	13.2243	12.2603	11.9312	12.2817	11.5054	13.2217	12.1213	11.9178	11.4373	12.1364	11.4049	12.3132	12.2312	11.5588	10.6352	11.9161	11.8692	11.7099	11.9322	12.2076	11.4165	11.943	11.7104	11.6605	11.4523	11.9137	11.8423	11.7161	11.2792	11.7732
RPS15A	not-sig	not-sig	#N/A	#N/A	#N/A	#N/A	NA	15.7636	15.6554	15.5165	15.3202	15.3037	15.4256	16.5299	16.1397	15.9576	15.1766	16.2887	16.4851	15.0829	15.8912	16.1567	15.7785	16.41	15.4005	15.9708	15.9766	16.3674	15.4014	16.4661	15.6736	16.1343	16.0012	16.2001	15.8653	16.4322	16.5497	16.1954	15.9546	15.2591	16.1421	15.9167	16.2985	16.1206	16.387	16.1254	16.3269	15.9663	16.3196
COL1A1	1	EMT	0.393933	0.0439981	1.86221	0.0470043	NA	18.9489	14.0687	17.9929	18.337	19.3474	17.0669	17.4629	19.0699	17.2557	16.3147	17.49	17.4084	17.9776	17.0212	17.4243	16.5204	17.4738	19.124	18.1892	16.3316	18.2483	18.0241	16.5582	17.1604	16.7849	16.9003	16.8818	18.8575	17.8398	17.3292	18.3141	20.4502	17.2393	17.7344	16.6236	17.1912	20.1872	16.7512	17.1812	17.1679	18.4659	18.708
CASP6	2	METAB	#N/A	#N/A	#N/A	#N/A	NA	13.7915	14.0789	14.3251	14.1354	13.2959	14.2915	17.3497	13.8668	13.8027	14.0381	13.9858	13.9162	13.9307	13.6882	13.8495	13.7582	14.0701	15.092	13.7177	13.6375	13.7682	12.2715	13.9713	14.1573	13.343	14.1077	14.2762	13.8825	13.9215	14.4159	13.622	13.7305	14.422	13.4747	13.589	13.6367	13.7671	13.0485	13.9647	13.3307	13.3335	13.4409
RPP25	not-sig	not-sig	#N/A	#N/A	#N/A	#N/A	NA	13.2541	13.1086	13.248	12.8878	12.2328	12.1381	11.4525	12.5839	12.0964	12.639	11.1011	12.1838	12.3301	12.3992	11.9103	11.9078	11.9909	11.7595	12.111	12.1417	12.3985	11.6134	12.5944	11.7157	12.0704	12.8925	12.2452	12.5844	11.8539	9.80029	12.1338	12.0218	11.3204	12.6393	13.2896	13.0503	12.0934	10.6179	11.6402	12.1034	10.7823	11.3923
RETSAT	not-sig	not-sig	#N/A	#N/A	#N/A	#N/A	NA	14.8184	14.7147	14.5287	14.8547	14.6092	14.3213	15.0705	15.0056	14.6372	14.4802	14.6818	14.9105	14.3911	15.0806	12.1451	14.6628	14.8596	14.5454	11.8781	14.626	14.3471	14.339	14.375	14.9837	15.1787	15.2033	12.5368	14.6839	14.7921	14.3175	14.687	14.8385	13.6636	15.1872	15.0838	14.8942	14.7021	14.5014	14.9682	15.2195	15.3679	15.5092
NUFIP2	not-sig	not-sig	#N/A	#N/A	#N/A	#N/A	NA	11.9575	12.3688	12.584	12.3071	13.0335	12.4179	14.628	11.7512	13.018	11.8193	12.7358	12.5137	11.5677	12.4587	11.521	12.7577	13.1141	14.2514	12.4801	12.8144	12.262	11.6771	12.2899	12.1884	12.9722	12.5391	12.5044	12.5124	12.6712	13.0488	12.4127	12.2596	10.8787	11.6508	12.8826	12.7079	12.1973	12.3854	12.1382	12.1464	11.3	13.5529
SEPTIN8	2	METAB	#N/A	#N/A	#N/A	#N/A	NA	14.6354	13.7891	13.9951	13.915	12.9833	13.9967	15.9536	13.6026	13.7759	14.2346	13.9201	14.2611	13.6936	13.9459	14.1917	14.0423	14.0565	14.6784	14.2216	14.0348	14.2319	13.7598	14.2798	13.946	13.8049	14.1404	13.52	13.9608	14.0259	14.3089	14.1225	14.1504	12.9281	14.2616	14.0444	14.0527	14.7683	13.5108	14.0324	14.1471	14.2565	13.9037
RAB3GAP2	not-sig	not-sig	#N/A	#N/A	#N/A	#N/A	NA	13.7755	13.2696	12.7733	12.6424	13.3871	12.7526	14.4254	12.7771	12.9218	13.4	12.9686	13.2238	14.1089	13.0552	12.4466	13.4825	13.5751	14.9489	13.3155	13.2212	12.6941	13.341	13.2445	12.9421	13.7632	13.3581	12.998	13.0363	12.7489	13.2458	13.1009	13.1342	14.1116	13.1468	13.6597	13.373	13.4572	12.2573	13.0218	13.1216	13.3954	12.8267
MED24	not-sig	not-sig	#N/A	#N/A	#N/A	#N/A	NA	11.937	11.8515	12.9049	12.1362	12.1097	12.024	12.0563	11.5951	12.7565	12.5929	11.0364	12.9217	12.6681	12.3303	11.7082	11.9227	12.9424	12.2609	11.0652	12.0975	12.5219	11.087	12.5631	12.1633	12.6633	13.3491	11.8914	12.0811	12.0985	11.5402	12.7087	11.4307	12.8164	11.9769	12.3287	12.3254	12.2277	11.1494	11.6549	12.0677	15.2205	10.341
CPSF6	not-sig	not-sig	#N/A	#N/A	#N/A	#N/A	NA	15.337	15.7398	15.1831	15.3304	15.9744	16.0224	15.9115	15.1677	15.8192	15.5722	15.5762	15.5646	15.5024	15.345	15.2289	15.4281	15.5617	15.8862	15.7178	15.7834	15.6271	15.4454	14.795	15.7836	15.9435	15.7105	15.7478	15.3502	15.5543	15.4918	15.5655	14.8348	15.0675	15.1455	15.7928	15.4848	15.1252	15.6494	15.526	15.8389	15.3106	15.2498
STAT5B	not-sig	not-sig	#N/A	#N/A	#N/A	#N/A	NA	12.5253	12.0116	12.5287	12.1242	13.078	12.5928	12.7184	12.724	12.9724	12.9073	12.3889	12.1869	13.0934	11.9072	12.6569	12.7239	12.7662	13.86	13.495	12.6154	13.241	12.7807	12.5486	12.6305	13.2958	12.5496	11.104	12.1126	12.669	12.386	13.1969	13.2727	12.338	12.6609	13.0637	11.7459	12.5351	10.787	13.1147	11.8752	13.3433	13.0046
ROCK1	1	EMT	0.303895	0.0512234	2.0952	0.0484284	NA	14.6458	14.227	14.1192	12.7257	13.7292	13.9067	14.3361	14.2342	14.2026	14.0526	13.9756	14.0042	13.1757	13.1959	14.4515	14.0711	12.9765	11.4246	14.4363	14.0506	14.1068	13.7112	14.6443	13.7849	14.0538	13.8937	13.4151	13.7555	14.5731	13.3282	14.0969	14.0244	13.4503	14.3271	14.4783	14.0436	14.1108	14.3295	14.4235	14.2477	14.1794	14.8237
EIF5	not-sig	not-sig	#N/A	#N/A	#N/A	#N/A	NA	15.9206	15.8396	15.9442	16.0071	16.0206	16.36	15.7819	15.8762	16.1715	15.7583	16.1295	16.1069	15.6339	15.8244	16.179	15.9698	16.0558	15.794	15.8968	16.1292	16.1842	15.7973	16.336	16.4607	16.4909	16.0574	16.0678	16.2164	16.0263	16.0988	16.3662	16.0985	13.8032	16.3527	16.0213	15.9157	15.9845	15.5387	16.0202	15.7229	15.9326	15.9427
PRPSAP1	not-sig	not-sig	#N/A	#N/A	#N/A	#N/A	NA	13.8019	13.5412	13.6871	13.3074	13.9191	13.4576	15.9703	13.6078	13.8822	13.7122	13.7072	13.867	13.6953	13.5043	14.1938	13.9472	13.7337	13.6673	13.5901	13.7284	14.0508	13.5284	13.565	14.1858	13.9441	14.2008	13.6361	13.8674	13.775	12.9686	14.2209	13.2343	13.7354	13.4706	13.7876	13.8421	13.5058	13.9036	13.5537	13.4472	13.8376	13.3854
ASMTL	not-sig	not-sig	#N/A	#N/A	#N/A	#N/A	NA	14.1564	13.8773	13.9397	14.3826	11.97	12.9664	12.2806	13.9789	13.6741	13.7565	14.1955	14.0242	12.3304	13.5242	13.7398	14.327	12.3802	14.8785	14.638	13.7244	12.6428	14.9527	13.7129	14.1771	13.2211	13.9695	14.2715	13.6917	13.9837	13.5871	11.7708	14.319	13.0011	12.6826	11.8061	13.4159	11.8724	14.4643	14.6221	13.5312	13.1532	11.2472
RFC2	not-sig	not-sig	#N/A	#N/A	#N/A	#N/A	NA	12.4417	12.0768	12.6428	12.032	13.7495	12.3345	17.6618	12.829	12.3657	12.8977	12.4072	13.2888	12.9523	12.359	13.5541	12.6074	12.5145	14.1671	12.3441	12.3403	12.1153	12.7642	11.9416	12.9968	12.9986	12.4139	13.6247	12.5934	13.2076	12.4426	13.132	12.8504	11.9592	12.8661	12.5323	13.5569	13.6421	13.9943	12.1234	12.1555	12.3744	12.8696
THEM6	not-sig	not-sig	#N/A	#N/A	#N/A	#N/A	NA	16.9358	15.7431	15.6817	16.0789	16.2164	16.9647	12.4856	15.6408	16.1278	16.1647	15.3414	15.591	15.1446	16.3068	15.968	14.7479	15.55	15.9049	15.8867	14.9813	15.09	15.0996	16.2018	15.5172	15.1411	16.5052	15.5994	15.46	15.6754	15.4184	15.5169	15.825	15.9807	16.2006	15.6127	14.62	16.3309	15.9222	15.6341	16.3122	14.8605	15.1135
ADH1C	not-sig	not-sig	#N/A	#N/A	#N/A	#N/A	NA	12.3707	14.2858	14.1375	17.1881	13.8011	15.5795	16.0461	15.6775	14.3219	14.4568	14.8656	12.548	15.4152	16.9156	12.9353	16.8436	13.361	14.4262	14.1909	16.9187	13.0057	13.7887	18.1022	13.3334	13.2649	12.4185	16.1778	15.8316	14.722	15.1372	15.0735	12.7101	15.85	15.9118	13.9315	12.7152	13.3624	15.3227	16.3197	14.5129	16.4424	16.8703
RDX	not-sig	not-sig	#N/A	#N/A	#N/A	#N/A	NA	18.6773	18.2309	18.6648	19.0099	18.5585	18.5015	18.437	19.0887	18.5725	17.809	18.4115	18.6671	18.463	18.4933	19.0702	18.431	18.5939	20.4722	18.9906	18.5489	18.8101	19.6704	18.6715	18.2275	18.3215	18.3825	18.1282	18.8003	18.4089	18.227	18.0993	18.2531	18.3867	18.5473	18.2997	18.8339	18.146	18.5516	18.4174	18.0363	18.8429	18.8283
NCAPG2	not-sig	not-sig	#N/A	#N/A	#N/A	#N/A	NA	13.1866	13.128	13.1089	11.2059	15.9328	14.0037	13.9095	11.9943	13.5707	13.0565	12.3776	13.5759	12.44	12.7272	14.9039	13.6176	11.6768	14.2218	13.3234	13.9575	12.3744	11.9942	12.8127	13.7058	13.5842	13.1429	17.5216	13.8735	14.329	8.34269	11.9992	12.3595	12.5131	13.121	15.982	13.8001	13.8832	13.8076	12.3954	13.1375	12.7466	12.447
TARBP1	not-sig	not-sig	#N/A	#N/A	#N/A	#N/A	NA	13.2058	13.494	13.4391	13.4733	13.4574	13.4596	13.7826	13.4822	13.1913	13.6028	13.3096	13.4967	13.0528	13.5948	13.4666	13.4005	13.3182	8.55928	13.2252	13.6953	13.338	12.9808	13.5561	13.3805	13.6504	13.4061	13.5412	13.4056	13.3265	13.9019	13.1063	13.0407	12.8457	13.4172	13.5858	13.5951	13.6254	13.8179	12.1691	13.7687	12.186	12.0841
SDHB	not-sig	not-sig	#N/A	#N/A	#N/A	#N/A	NA	16.0365	16.831	16.4595	17.0488	16.875	16.6807	15.4919	16.913	15.7987	16.6917	16.6912	16.2794	16.7576	16.5116	15.8788	16.5244	16.2267	16.6777	16.262	16.3773	15.8588	15.8817	16.2922	15.1461	16.3417	14.3419	15.6442	15.9216	16.5975	17.3134	15.8327	16.3898	15.851	15.6468	15.8169	15.4238	15.7208	15.9715	16.22	15.6828	15.8252	15.5623
DMAC2L	not-sig	not-sig	#N/A	#N/A	#N/A	#N/A	NA	13.0893	13.3486	12.9504	12.965	12.9698	13.8378	11.1011	12.3253	12.0256	13.9144	13.4428	12.6186	13.0946	12.829	11.7363	13.1856	13.3717	11.5627	11.791	12.9879	12.8125	12.0164	13.3576	11.9078	12.5131	13.4077	10.57	12.102	11.8137	13.8515	12.6174	11.7687	11.0723	11.8692	14.1	12.0963	14.3725	12.5971	11.741	12.0723	11.3621	12.1108
HVCN1	not-sig	not-sig	#N/A	#N/A	#N/A	#N/A	NA	12.2081	12.1588	11.822	13.1617	13.1838	10.4613	13.7803	12.7632	13.7167	12.2253	12.8545	11.8769	12.1842	11.294	11.7962	12.0262	12.712	12.8063	13.0951	11.336	11.2103	13.2451	12.5923	12.5213	12.3132	12.9573	11.471	12.6754	11.7054	12.9614	11.187	12.0857	12.8514	12.5103	13.2363	11.5305	12.1487	12.1313	13.2974	12.9418	14.0127	12.8014
GEMIN4	3	CANONICAL	#N/A	#N/A	#N/A	#N/A	NA	15.133	14.446	15.4422	15.2749	13.1368	15.2466	13.3073	14.8616	15.1744	14.7779	15.094	14.4193	13.0942	15.3878	15.1458	14.4084	15.5314	14.3208	13.5961	14.1039	15.4697	13.6588	15.0728	15.116	12.8698	15.4946	14.6592	15.2956	14.8391	14.9677	15.4432	15.6711	14.3355	14.8444	14.8863	15.0873	13.8011	14.5754	15.2306	15.8245	14.3038	15.3059
NUP54	not-sig	not-sig	#N/A	#N/A	#N/A	#N/A	NA	13.4627	13.5837	13.3049	12.6127	13.7524	13.9042	14.4402	13.261	13.5871	14.2771	13.4456	13.5324	13.5795	12.9854	13.6498	13.6571	13.1802	13.7871	13.4952	13.7225	13.7845	12.5802	13.1095	13.5396	13.7039	13.4855	13.8763	13.0395	14.0089	13.3366	13.5033	13.2497	15.2083	12.9057	13.1357	13.8865	14.1193	14.0063	12.7346	13.4067	12.7883	12.704
SERPINH1	not-sig	not-sig	#N/A	#N/A	#N/A	#N/A	NA	15.655	15.8998	17.4221	16.2881	16.4878	16.2933	16.729	16.4013	16.3829	16.4978	16.9262	17.0164	17.4234	15.7335	16.9094	15.244	17.3215	17.9642	16.4969	15.8621	17.426	17.5491	16.2206	16.1848	16.8901	16.9893	17.4376	16.8128	17.1519	16.3889	15.9506	16.1144	17.12	16.7565	16.5799	16.7881	17.4605	17.6228	16.449	17.0725	16.8449	15.9562
RDH14	not-sig	not-sig	#N/A	#N/A	#N/A	#N/A	NA	13.5976	13.2102	13.1171	12.972	13.8648	13.4798	12.1559	13.2953	12.2607	13.1873	13.4523	12.7614	10.9717	12.6943	12.4395	12.8639	13.3022	15.0395	12.9204	12.8732	12.7822	12.3402	12.9975	12.967	12.0687	13.7232	13.0387	12.5912	12.6422	13.0956	13.03	12.3456	11.2106	12.6119	13.4096	13.4446	13.2176	12.6181	12.9407	13.0208	13.5665	12.3782
DTYMK	not-sig	not-sig	#N/A	#N/A	#N/A	#N/A	NA	15.2768	14.9919	15.3161	15.2529	14.8951	15.1929	15.8917	14.9572	14.6255	14.8382	15.0906	14.6439	14.8206	14.9417	14.9164	15.0504	14.9484	12.2178	14.8549	15.0201	15.1575	15.2961	14.6062	15.3314	15.5615	14.9462	15.4479	14.897	14.9077	14.8759	15.1567	15.0594	13.4307	15.1861	14.4687	15.382	15.1147	15.0369	14.7438	14.5971	14.9432	15.1469
ALDH6A1	2	METAB	#N/A	#N/A	#N/A	#N/A	NA	13.2625	15.3496	15.1076	16.3231	15.502	15.3831	16.7587	16.8701	15.0335	13.7445	14.6834	13.7059	14.7044	14.296	14.5101	14.2256	12.9149	15.0781	12.6776	13.9258	13.518	13.8024	14.1946	14.4246	12.9807	13.1077	13.0107	13.0077	13.5849	14.4742	13.9831	13.3801	14.1029	12.8485	14.5259	13.4046	12.5328	13.5944	13.5611	13.7004	13.1807	13.8346
TCP1	not-sig	not-sig	#N/A	#N/A	#N/A	#N/A	NA	17.0034	17.5976	17.5898	16.3743	17.1224	17.2628	17.0759	17.2547	17.3426	17.542	17.3964	17.0389	17.8014	17.2566	17.5674	17.8072	17.1008	16.0099	17.4623	17.1342	16.7939	17.4898	16.9418	17.4906	17.597	17.308	17.5238	17.644	17.4696	17.1205	16.9853	17.131	17.9901	17.2338	17.3984	17.5367	17.2235	17.8727	16.7567	16.851	16.8398	16.7952
TUBA4A	not-sig	not-sig	#N/A	#N/A	#N/A	#N/A	NA	15.0715	14.3829	15.1557	14.7472	14.3678	15.1859	15.2413	15.4107	14.3486	14.4674	15.5165	14.4212	14.4387	14.2973	14.4936	14.5284	14.3655	16.4788	14.4439	14.2466	14.5275	13.5201	14.1807	14.4449	14.1747	15.4732	15.1506	14.8148	14.0928	14.1208	14.3719	14.6847	16.3279	14.4614	14.4693	15.4189	13.7527	15.3967	14.7504	14.2643	14.1305	13.6966
APOD	4	IMMUNE	#N/A	#N/A	#N/A	#N/A	NA	13.8294	14.6515	13.7497	14.7369	15.4564	13.117	16.5987	15.4526	14.7937	12.834	13.7198	14.1486	12.8899	14.5429	14.648	13.2063	14.6355	13.3555	14.2844	13.8347	13.5957	14.6137	13.6198	14.157	13.8052	13.6106	14.3706	13.7383	14.1783	14.0602	13.8813	14.6018	13.0284	14.3609	13.63	14.0494	14.1043	14.1578	14.6788	14.7887	14.9251	14.8138
UCK2	not-sig	not-sig	#N/A	#N/A	#N/A	#N/A	NA	12.6431	13.308	12.883	12.7932	13.1032	11.9996	11.4618	12.3804	12.4801	13.1796	12.9174	13.0573	11.8016	13.1023	13.1305	12.8549	13.4327	12.1347	13.0454	12.975	12.6196	11.4004	12.5787	12.4705	13.2735	12.8555	13.9835	12.7558	13.0926	13.5465	12.9639	12.2332	13.0898	13.2301	13.0819	14.3322	13.9923	13.7817	13.047	13.0049	12.6357	12.5555
COL6A1	1	EMT	0.379348	0.0575348	1.82356	0.0519677	NA	17.2362	16.0364	18.3458	17.5365	18.1253	17.2355	18.2222	19.0241	16.5057	17.837	17.5352	17.3957	18.2519	17.5415	17.0743	17.2313	17.2749	18.5862	18.4766	17.1448	17.287	19.0701	17.2012	16.8404	18.0835	16.3132	16.6308	17.0359	17.0628	17.861	17.6586	17.4997	18.2563	18.3631	16.8604	17.1117	18.7523	17.1077	17.3509	17.2477	18.5246	18.7501
LANCL1	not-sig	not-sig	#N/A	#N/A	#N/A	#N/A	NA	14.4739	14.9757	14.5653	14.731	15.0011	14.7141	13.2185	14.6553	14.616	14.3332	14.7853	14.3089	14.8398	14.6127	14.3951	14.5368	13.9139	14.8029	14.2777	14.8048	14.9262	14.687	14.2145	14.5449	14.5894	14.5153	14.8762	14.5539	14.6267	14.5487	15.1631	14.5369	16.0886	14.3166	14.2357	14.7454	14.8832	15.0856	14.5066	14.9764	14.2482	15.0329
DNAJA4	not-sig	not-sig	#N/A	#N/A	#N/A	#N/A	NA	16.0307	18.013	17.0311	17.7432	14.2075	17.4451	15.9041	12.7321	17.6105	17.2608	15.9596	16.5043	15.429	17.2707	16.9733	17.2187	17.9163	15.5294	14.9878	17.8358	18.0342	15.1163	17.5103	15.1276	18.2603	17.4407	15.3173	17.6622	17.924	17.5443	16.603	18.2254	17.6302	17.3506	15.3342	18.0333	16.6287	17.5127	15.0733	18.3903	12.8964	18.1172
ATP5F1A	not-sig	not-sig	#N/A	#N/A	#N/A	#N/A	NA	18.7669	19.0876	18.3153	19.0732	19.1511	19.138	18.9404	19.5602	18.6155	19.0127	19.1164	19.1974	18.0491	19.0248	18.8017	18.8517	18.2953	17.6487	18.0442	18.7226	18.5301	17.9974	19.1317	18.9236	18.3745	18.1756	17.8791	18.6845	18.9863	19.708	19.2563	18.5134	17.5431	18.737	20.0799	18.4073	19.0185	19.0497	18.5983	18.9505	18.87	19.339
COG6	not-sig	not-sig	#N/A	#N/A	#N/A	#N/A	NA	14.8434	14.1353	13.7855	13.7735	14.6356	14.1154	12.8289	14.2945	14.1025	14.1697	14.1896	14.1227	14.3782	14.3904	13.3089	14.555	13.9747	14.4016	13.7271	14.5799	14.2737	14.7385	14.0778	14.4874	13.7862	13.9436	13.8087	13.5011	13.8814	13.7369	14.1499	14.1665	15.0134	14.4654	14.6307	14.0787	13.9982	14.1203	13.5521	14.4773	14.4242	13.9694
LPCAT1	4	IMMUNE	#N/A	#N/A	#N/A	#N/A	NA	12.3534	13.8796	13.8537	15.1576	15.2671	15.0982	14.467	15.1286	13.6963	13.8288	14.877	14.4087	14.6391	14.392	14.1313	14.4613	13.7188	13.9709	12.9211	13.4418	13.6061	13.8603	13.2255	13.9874	13.8906	12.5132	14.7362	13.7259	14.1659	12.9494	13.9703	13.8496	13.9177	14.3912	13.8348	14.9498	13.5301	15.0485	14.6416	14.9784	15.3201	15.352
NRM	not-sig	not-sig	#N/A	#N/A	#N/A	#N/A	NA	13.0857	12.2649	12.6644	11.7648	11.8806	12.3155	12.745	12.6438	12.729	12.3266	12.317	13.9527	12.6901	12.4444	13.4886	12.7468	10.856	11.6377	12.6492	13.2394	13.9205	13.7584	13.0514	13.527	12.0156	13.481	13.2452	13.3921	13.2431	13.7661	13.663	13.7252	12.462	12.4058	13.7459	12.9969	12.2953	11.8733	11.8578	13.046	12.9141	13.2976
DOCK10	not-sig	not-sig	#N/A	#N/A	#N/A	#N/A	NA	13.6979	12.8995	12.8815	12.357	11.448	12.6438	13.2407	13.818	13.1818	11.9976	12.7051	12.9159	11.6096	13.1843	12.7168	13.8915	13.1008	11.1968	13.7413	13.1522	13.6566	12.7892	12.4404	12.699	13.1404	13.3535	12.1492	13.054	13.5817	12.8102	13.7714	13.3593	12.2999	12.4526	11.5485	12.0176	11.4279	12.688	12.951	13.4298	12.0669	11.5944
TAPBPL	not-sig	not-sig	#N/A	#N/A	#N/A	#N/A	NA	16.2237	16.03	15.7553	15.8057	13.8489	16.2564	13.6204	11.4029	11.8817	15.1327	15.0556	15.8684	15.8534	16.2511	15.985	16.2115	16.308	14.9864	15.5611	15.5589	15.7698	14.6117	16.2442	16.1784	15.5969	16.0572	15.4249	15.6819	14.7494	15.7729	15.9626	15.4116	14.3271	14.6989	15.9269	14.3278	16.4434	16.2683	15.9797	14.7301	14.7502	15.7141
MTDH	not-sig	not-sig	#N/A	#N/A	#N/A	#N/A	NA	15.6452	15.5793	15.3602	15.4679	16.1655	15.1988	14.1528	15.3165	15.4048	15.618	16.1364	15.0509	16.1072	15.1219	15.8571	15.0333	15.4049	15.6207	16.067	15.1621	15.0999	14.8474	16.0675	15.4726	15.9997	15.2591	15.5399	15.2781	15.5709	15.2656	15.207	15.1931	16.3141	16.2594	16.5735	15.5928	16.8781	15.1743	15.2195	16.1296	15.7574	15.245
ETFDH	not-sig	not-sig	#N/A	#N/A	#N/A	#N/A	NA	14.1644	13.8046	13.9213	14.5345	15.227	14.6384	12.1183	15.0559	14.2798	13.7174	14.5135	13.9846	14.2722	14.1894	13.7042	14.3567	14.5407	15.0136	13.8307	14.266	14.3706	14.9577	14.9347	14.4967	12.9841	13.5847	12.7797	14.1956	14.0689	15.1808	14.2992	14.5082	11.6641	14.0082	14.3466	14	14.004	13.8495	14.455	14.3233	14.7691	13.7551
EHMT2	not-sig	not-sig	#N/A	#N/A	#N/A	#N/A	NA	12.1	12.3992	12.523	12.9671	11.9816	12.6783	13.2191	13.1018	12.3531	11.6886	12.3839	12.5089	11.4847	12.3689	11.9883	12.7351	12.867	12.7038	12.1999	12.5486	12.4344	13.0308	12.8188	12.5983	12.6109	12.8433	10.9482	12.8197	12.4909	13.1764	12.7766	12.9442	12.6823	13.2493	11.1187	12.005	13.1326	12.5151	13.1622	13.2266	13.3777	13.0126
FANCI	not-sig	not-sig	#N/A	#N/A	#N/A	#N/A	NA	14.7454	13.1935	14.7063	12.6808	13.29	13.3222	14.0804	15.101	13.2666	13.4411	13.6498	14.131	14.1988	14.6958	13.8498	12.7689	13.8768	14.03	13.4905	13.539	13.5977	13.1116	12.0743	13.4308	14.7716	13.9734	13.3415	14.4194	13.5953	12.6172	13.8218	13.772	15.4092	14.0386	14.7236	14.2748	12.5264	12.538	14.7547	12.682	13.911	13.1171
TMEM87A	not-sig	not-sig	#N/A	#N/A	#N/A	#N/A	NA	13.6943	14.0287	13.7241	13.7477	11.8169	14.0661	13.0043	14.1397	12.6544	13.5003	13.5139	13.5322	14.3138	14.3825	13.5899	14.1241	12.6879	12.3654	13.0757	13.1498	13.6844	11.6999	13.4809	12.4426	13.6219	14.1084	13.6795	14.1875	12.223	13.8465	13.961	14.098	12.8134	13.8499	13.8789	13.6432	12.9687	12.9044	13.5489	14.4714	13.8559	13.8978
ATP1B3	not-sig	not-sig	#N/A	#N/A	#N/A	#N/A	NA	15.8141	14.9931	15.3944	16.0271	15.6305	16.1425	12.5359	14.9535	15.8205	15.6122	16.2342	15.2269	15.6703	15.5362	16.5998	15.7086	15.6844	18.1177	15.568	14.7565	15.4208	15.948	15.6258	15.6753	15.6068	15.3668	15.5564	15.598	15.2982	15.8181	16.0036	15.1341	15.7746	15.3826	15.4468	14.7902	15.5543	14.8092	15.359	14.5718	15.908	15.5443
ADGRE5	not-sig	not-sig	#N/A	#N/A	#N/A	#N/A	NA	15.3832	14.6363	15.7322	15.2066	15.2393	15.2394	16.382	16.3428	14.8595	15.5826	15.0715	14.7563	16.323	15.0973	14.4929	15.7441	15.527	15.5339	16.4989	15.0735	14.5058	16.0979	14.7743	15.3995	15.8227	14.511	15.1298	14.6208	14.677	15.4302	15.1113	15.5306	14.5615	15.6726	13.9415	14.9298	16.3298	14.1001	14.8476	14.878	15.7032	16.4751
VIM	not-sig	not-sig	#N/A	#N/A	#N/A	#N/A	NA	19.9201	18.8284	20.4971	19.9841	19.1462	19.8022	20.6425	19.7052	19.916	20.4349	19.8761	20.0899	20.9147	19.6751	19.554	19.3627	19.8252	22.1352	20.4124	20.0128	19.9997	20.7435	19.7508	19.9863	20.2826	19.3518	19.6195	20.3779	19.8749	20.2143	19.6607	20.1176	19.6788	20.0811	20.0123	19.5342	20.7774	19.7077	19.8783	19.9135	20.3227	20.3596
BCAR1	not-sig	not-sig	#N/A	#N/A	#N/A	#N/A	NA	14.3571	14.3193	13.8704	14.8885	15.0079	14.2012	12.6957	14.5492	14.001	13.1274	13.8714	13.4011	14.5171	13.853	13.7991	14.3198	13.5056	12.6526	14.1259	13.7155	14.176	15.0375	13.3472	13.086	13.8163	13.0534	14.5819	11.7937	13.017	13	12.818	14.1169	12.126	14.822	11.1476	13.9433	14.2784	14.233	13.91	16.2006	16.305	13.3773
PTPA	not-sig	not-sig	#N/A	#N/A	#N/A	#N/A	NA	16.8873	16.311	14.7866	15.9153	15.6021	16.0958	16.2554	16.4912	15.8987	15.3161	15.7438	15.786	16.3464	15.9628	16.0858	16.0227	16.1542	15.2136	15.7088	15.8522	16.0196	15.9864	16.1022	15.5859	15.7198	16.1285	15.9891	15.4444	15.9323	16.2306	15.6008	15.8865	15.8837	16.0724	16.4899	16.115	15.2065	16.1099	16.0461	15.3306	15.8135	16.1397
SCARB2	not-sig	not-sig	#N/A	#N/A	#N/A	#N/A	NA	14.7483	14.5763	13.9003	14.998	14.8571	14.3425	17.1785	15.2594	14.7064	14.5432	14.8263	14.4804	14.3141	14.7499	14.0109	14.3512	13.6998	15.7884	14.4786	14.7326	13.898	14.4048	14.5433	14.8366	14.6567	14.131	15.1082	14.4687	13.8682	14.9179	13.8736	14.4135	15.1893	14.5555	14.6803	15.112	15.4479	15.0466	14.5325	14.6826	14.8303	15.31
PPM1B	not-sig	not-sig	#N/A	#N/A	#N/A	#N/A	NA	12.0474	13.4982	12.5621	12.7908	10.7448	12.2236	14.4666	11.5412	11.7043	13.4155	13.232	12.1435	12.8117	12.6861	12.8911	12.8796	12.6505	10.8001	12.8946	12.2459	12.4466	11.8947	12.7768	12.9716	11.4816	14.3397	11.6474	13.0555	13.4831	13.5247	12.3847	12.557	12.4568	13.5056	13.3473	12.1938	10.8786	14.549	13.0133	13.4863	14.7361	12.6152
DFFA	not-sig	not-sig	#N/A	#N/A	#N/A	#N/A	NA	12.8706	13.1148	12.4319	12.8001	14.063	12.7368	12.4452	12.9755	13.4062	12.6201	13.0529	12.7423	13.4743	12.1154	13.4988	12.6187	13.1768	12.3092	12.0574	12.4824	13.5051	13.1722	12.7152	13.1653	13.1081	12.8795	13.1132	12.8897	12.593	13.669	13.479	12.9725	11.3288	12.354	12.2923	12.7341	13.7798	13.355	12.9646	12.3138	12.1215	13.7322
ARHGEF2	not-sig	not-sig	#N/A	#N/A	#N/A	#N/A	NA	14.2903	12.8488	13.5009	12.7152	14.0538	13.4124	13.2878	13.6214	13.7627	12.8973	13.0798	14.1905	14.2979	14.4471	13.9746	11.5469	14.1121	13.7458	14.4499	13.6098	14.4257	13.7182	12.834	14.3701	14.4126	12.9125	13.7962	14.3372	14.1138	14.2986	14.7444	14.1824	12.9515	12.8772	14.34	13.2176	13.4224	13.6302	14.174	12.9375	14.0367	13.9012
WDR11	not-sig	not-sig	#N/A	#N/A	#N/A	#N/A	NA	13.903	13.5383	13.7746	13.8526	14.1118	14.1952	13.2568	14.2106	13.8124	14.1459	13.5273	13.5982	14.1955	14.224	13.5287	14.296	13.6009	15.1377	13.7663	12.9154	14.1107	13.1775	13.8711	14.3161	14.2105	13.7885	13.6557	13.7287	13.6687	14.2211	13.8983	13.8647	13.1153	14.1232	13.803	14.1668	13.7756	13.9437	13.9015	14.1252	13.4391	14.2771
CDK5	not-sig	not-sig	#N/A	#N/A	#N/A	#N/A	NA	13.623	13.286	12.659	13.518	14.2694	13.1568	15.4203	13.0469	12.9353	13.0294	13.2355	13.0946	12.6515	12.7968	13.4911	12.7948	12.6324	13.1189	12.9255	13.4809	13.2684	13.3978	12.8814	13.0316	12.2879	13.705	13.6305	13.7481	13.2823	12.8298	13.2384	13.1253	12.5683	13.6657	13.2092	12.9261	13.0119	13.3838	12.9772	13.1261	12.9822	12.3423
VAMP8	not-sig	not-sig	#N/A	#N/A	#N/A	#N/A	NA	13.0474	11.6768	12.8382	11.1447	13.385	12.2023	12.4351	11.3811	13.5022	12.733	11.8026	11.7764	11.9817	11.6271	13.3984	12.5512	12.8876	12.5127	13.015	11.629	13.1529	11.0595	11.9192	13.5358	12.43	12.8003	13.3965	13.6248	12.68	10.8134	12.575	12.7813	12.2824	13.4848	13.0132	11.9458	11.3782	12.0729	11.2922	11.3349	13.0581	13.3535
PSMB10	not-sig	not-sig	#N/A	#N/A	#N/A	#N/A	NA	13.9376	13.2728	13.6755	13.2093	12.6812	13.4644	13.1331	13.1963	13.5557	14.4656	13.5194	14.2546	14.0842	13.2642	14.4562	13.0773	12.8833	14.6806	14.2922	12.959	13.631	13.6625	14.016	13.9628	13.7951	12.3894	13.1736	14.1137	13.7083	14.0939	13.6482	14.2546	13.3512	15.141	13.7321	14.164	14.4287	15.0807	13.9068	13.527	14.0662	13.9701
CTNNA1	2	METAB	#N/A	#N/A	#N/A	#N/A	NA	16.1936	16.5227	16.3089	16.2492	14.251	16.249	14.9048	15.7683	16.0152	16.6504	16.3871	16.3631	16.2469	16.7799	16.2933	16.6116	16.3283	16.4046	16.3525	16.7762	16.5017	15.3192	16.6193	16.585	16.5171	16.8131	16.4648	15.9141	16.2274	15.9823	16.3346	16.1253	16.1116	16.3179	16.4957	16.4361	16.3121	15.9748	16.1858	16.7152	15.9289	16.1647
PLEKHA5	not-sig	not-sig	#N/A	#N/A	#N/A	#N/A	NA	14.6416	14.6536	14.5952	14.2055	13.5994	12.8726	13.2592	14.7243	13.5981	12.9888	13.9272	14.2671	13.6038	13.5136	12.6759	13.3707	13.7462	12.2325	13.6062	13.75	13.3936	11.1916	14.3326	13.9661	14.045	14.3777	14.197	11.5228	11.448	14.1093	14.1569	12.6747	12.9407	13.7695	15.381	12.9573	14.0268	12.1646	13.6415	15.3343	13.4192	11.5865
EXOC8	not-sig	not-sig	#N/A	#N/A	#N/A	#N/A	NA	14.9387	10.545	13.8253	13.07	14.1142	13.8284	13.7932	14.4465	13.2646	13.7576	13.9958	14.0878	15.8285	13.8625	12.7621	13.8062	15.1796	13.5439	12.8584	14.1023	13.1667	14.6718	15.0509	13.5763	13.9302	14.6093	15.6465	13.9929	14.8491	15.4247	14.8858	14.8842	14.1979	14.5988	14.4288	13.5719	12.2325	13.6404	13.7773	14.3725	13.7838	14.8615
PHB1	not-sig	not-sig	#N/A	#N/A	#N/A	#N/A	NA	15.0428	14.7511	15.4348	15.7142	15.9543	15.3491	16.1778	15.3034	15.6539	15.5228	15.4823	15.8429	15.3287	15.3541	15.6414	15.3771	14.3264	13.1019	15.298	15.2784	15.055	14.8453	15.3253	15.1622	15.862	15.4372	15.6749	14.8085	15.2797	15.9846	15.2149	16.0093	15.3016	14.9838	16.1554	15.1057	15.35	15.2004	14.968	15.9375	14.9765	14.9472
DPYSL3	1	EMT	0.343243	0.0615298	1.86399	0.0581145	NA	16.5873	13.8864	14.9109	16.6755	14.6777	15.2702	15.3115	16.3577	15.8627	15.3831	15.9706	15.7593	16.8991	15.2578	14.8234	14.0912	14.541	18.2905	15.7588	14.9426	15.6505	16.2158	14.5227	14.8832	14.7514	14.3143	14.9278	16.0315	15.4209	16.1056	14.8658	17.4691	16.3563	15.5177	16.0688	15.7813	16.6334	15.1015	15.5708	15.731	16.9463	16.5498
ME2	not-sig	not-sig	#N/A	#N/A	#N/A	#N/A	NA	14.4553	15.2329	14.8628	15.0399	15.1083	15.1936	15.5373	15.3742	14.6265	15.3401	15.3496	15.3843	14.4475	14.5555	15.0515	14.6766	15.084	14.3225	14.5544	15.0645	14.4407	14.4991	15.6238	15.424	14.5708	14.1737	14.9508	15.7739	15.4717	15.344	14.7658	14.448	14.4287	15.063	15.4565	14.7653	14.8022	15.2684	14.7311	15.6744	14.9354	14.931
SLIT1	not-sig	not-sig	#N/A	#N/A	#N/A	#N/A	NA	16.3956	13.1637	13.9063	13.4223	14.7626	14.5455	12.9477	14.6453	14.2164	13.4245	13.6104	15.0782	12.9564	13.9635	14.926	13.4094	15.5221	13.4686	14.2623	14.2444	15.1162	14.3247	15.1996	15.4596	12.5227	14.925	13.9689	14.8681	15.3094	13.0634	15.3613	14.7323	14.1682	15.1973	14.991	13.1168	13.7645	13.8498	13.1997	15.3934	13.7533	13.1553
SLC4A2	not-sig	not-sig	#N/A	#N/A	#N/A	#N/A	NA	14.1717	12.3153	13.4776	13.0766	12.474	12.4455	12.6316	12.5478	12.0569	14.2882	12.4481	12.7755	12.3822	12.4853	15.7335	12.2592	12.3047	11.7134	11.7016	12.3987	12.6807	12.2828	12.3114	16.6054	12.0391	12.3128	12.471	12.3194	12.2671	12.235	16.0837	12.1416	12.6638	13.1937	11.3655	12.5294	13.2676	12.1669	12.645	13.1507	12.0641	13.3816
SRSF2	not-sig	not-sig	#N/A	#N/A	#N/A	#N/A	NA	15.4996	15.69	15.7753	15.5691	15.6901	16.0163	12.3004	15.4132	15.8201	16.1255	15.7543	15.6801	15.9695	15.7804	15.8228	15.6627	15.8221	15.8777	15.8408	16.0568	15.843	15.6231	15.5901	15.7377	16.1304	15.7689	15.5964	15.6562	15.8319	15.7446	15.8744	15.7354	15.8317	15.5918	15.8412	15.6591	15.9172	15.7274	15.5685	15.6548	15.5051	15.4695
BNIP1	not-sig	not-sig	#N/A	#N/A	#N/A	#N/A	NA	14.5695	14.4632	13.7645	14.1121	14.1449	14.4146	13.0496	13.8709	14.017	13.6651	14.1864	14.5284	14.1284	14.3163	14.893	14.235	14.4189	12.7053	14.1945	14.2096	14.5443	14.2552	14.7205	14.5287	14.2741	14.1581	13.7571	14.6072	14.8405	14.5826	14.4943	14.5164	13.837	14.7468	14.6673	14.748	14.1967	14.2184	14.8284	14.234	14.6585	14.6336
NUDT21	not-sig	not-sig	#N/A	#N/A	#N/A	#N/A	NA	14.9718	15.589	15.4753	15.1873	15.35	15.2551	16.4453	14.4612	15.5141	15.6151	15.6334	15.6089	15.6452	15.117	15.5794	15.0551	15.4968	15.4614	15.6095	15.542	15.7089	15.0205	15.3099	15.0605	15.8124	15.7884	15.4154	15.1476	15.1987	15.3154	15.3916	14.8653	15.5697	15.2366	15.4328	16.0651	15.3702	15.3495	14.9819	15.4733	15.055	14.7448
ARFGAP1	not-sig	not-sig	#N/A	#N/A	#N/A	#N/A	NA	13.6395	13.2365	14.9928	14.4283	12.9379	14.2925	13.2968	12.4706	14.0996	13.874	13.6993	14.2703	16.0848	12.538	12.3819	13.9157	16.6056	15.052	13.9027	15.2031	13.0565	13.1633	13.6967	14.0758	13.9502	15.5935	14.7608	13.7025	13.0818	13.2858	14.0454	13.969	16.6517	12.8744	13.5228	14.0994	14.1827	12.7885	14.1481	14.1594	12.8253	14.0343
ANP32E	not-sig	not-sig	#N/A	#N/A	#N/A	#N/A	NA	14.3774	15.1932	15.0219	15.0232	16.259	15.0452	16.4189	15.5583	15.1456	15.2553	15.0527	14.8348	15.1233	14.3997	15.8007	14.6183	16.0882	15.9001	15.5809	15.3728	14.6839	15.69	15.0674	15.6382	15.5271	14.1626	15.308	15.4348	15.3665	15.3812	14.7301	15.1279	16.8224	15.0231	15.5259	15.6037	15.1729	15.4184	14.6517	14.9996	15.5268	14.6995
WDR5	not-sig	not-sig	#N/A	#N/A	#N/A	#N/A	NA	15.8077	14.8244	14.6978	15.4205	15.4197	14.8947	15.7872	14.4597	14.693	14.6353	14.8821	15.3324	14.2125	14.5531	14.1363	14.147	14.8878	14.2062	14.183	14.9341	14.7744	14.859	15.4106	14.661	14.535	14.8691	14.9634	14.7119	14.717	15.2004	14.7731	14.1145	14.4836	15.5905	15.2402	15.0837	14.5014	15.257	15.1465	15.645	15.6356	15.6508
PSMC6	not-sig	not-sig	#N/A	#N/A	#N/A	#N/A	NA	15.1594	15.3658	15.3012	15.2508	15.1228	15.0262	14.7801	15.4565	15.4286	14.5516	15.1625	15.1632	14.8632	15.201	15.4133	15.1683	15.2011	15.6752	15.2536	15.1299	15.2073	15.3444	15.0471	15.2903	15.2115	15.2135	15.2097	15.304	15.4028	15.4131	15.0803	15.203	15.7148	15.6838	15.8777	15.9838	15.2769	15.3211	15.2693	15.0876	15.121	15.0439
MUC12	not-sig	not-sig	#N/A	#N/A	#N/A	#N/A	NA	11.6578	11.7619	10.7047	12.4491	12.6323	13.9856	12.3633	12.9041	11.8554	11.0808	12.3977	12.3889	12.9748	12.4233	13.1242	12.436	12.3618	11.9528	12.0074	13.4551	11.8532	11.6501	11.6041	12.1022	12.2801	12.1271	8.6536	10.0658	11.6203	12.4636	12.2011	13.2031	12.8877	13.7031	12.825	11.8661	13.2906	5.99297	12.1516	12.2907	11.7696	12.3898
GRIPAP1	not-sig	not-sig	#N/A	#N/A	#N/A	#N/A	NA	17.7831	15.9677	16.6976	17.0815	16.2867	15.9685	17.4382	16.2325	16.731	15.9235	15.8991	17.1986	16.3507	16.477	17.0422	16.6801	16.4533	16.8979	16.3746	16.4432	16.5457	17.5227	16.9822	16.5557	16.7161	16.8639	16.2625	16.6032	16.7269	16.5534	16.6286	17.1794	15.5223	17.2818	17.4879	16.6479	17.1182	16.7825	16.7215	16.5712	17.3415	16.793
RBBP7	not-sig	not-sig	#N/A	#N/A	#N/A	#N/A	NA	13.1054	12.9489	13.7196	13.7526	13.5615	12.1564	15.5537	13.382	12.8517	12.8145	11.4749	12.9213	14.4203	12.3738	12.9478	12.6072	12.4526	12.6538	13.1827	13.0311	12.3676	13.1189	13.4374	12.4135	13.2509	13.4035	12.8045	12.2635	13.0919	12.2188	12.8694	12.8793	11.1063	13.1755	13.5541	12.4577	14.3424	12.1102	13.0946	11.4407	14.987	14.0254
TRIM26	not-sig	not-sig	#N/A	#N/A	#N/A	#N/A	NA	12.6258	13.5854	13.6146	13.2794	13.5639	13.3317	13.043	13.29	13.6298	13.741	13.161	14.0762	12.5289	13.4388	13.9126	13.1023	13.7096	13.4868	13.7424	13.5552	13.5442	12.5733	13.9424	13.2343	13.4591	13.0423	14.0492	14.0615	13.6045	13.057	12.9116	13.0979	14.2519	13.3911	12.997	13.025	13.6046	14.078	12.9844	13.6007	13.469	12.9963
ANXA4	not-sig	not-sig	#N/A	#N/A	#N/A	#N/A	NA	16.2935	16.4757	17.0756	15.4046	16.5872	16.5522	16.4835	16.103	16.3306	17.0634	16.0097	15.635	16.6255	15.8847	15.9448	16.7585	16.5808	17.1087	15.766	16.857	16.1372	17.3796	16.4955	16.3829	15.9804	17.3238	16.2025	15.9793	16.2486	15.6701	16.23	16.1903	15.9024	16.2001	15.924	15.9894	16.1092	16.7632	15.7114	17.2292	15.0994	15.1
PARVA	1	EMT	0.300122	0.0766634	1.89746	0.0600944	NA	14.9575	14.5415	14.5759	14.4692	12.8876	14.0506	13.1379	14.7237	14.7903	14.9764	14.8997	14.4643	16.0585	14.28	14.3168	14.4458	14.2058	16.2887	14.9742	14.6448	14.3285	15.0862	13.9103	14.6424	14.5839	14.4186	14.4617	14.101	14.4397	15.0258	13.8649	15.0841	14.9883	14.6418	14.8725	15.0075	14.9001	15.3106	15.2368	15.3875	15.6452	15.2686
RBBP4	not-sig	not-sig	#N/A	#N/A	#N/A	#N/A	NA	14.7751	15.165	15.0605	15.0393	14.7006	14.3646	16.8991	14.8766	14.6754	15.0069	14.862	14.5551	15.0528	14.6089	14.8793	14.5362	14.5774	14.8139	14.5039	14.5444	14.7503	14.8483	14.5426	14.6147	15.1576	14.4917	15.0791	14.6895	14.7441	14.3241	14.6462	14.459	15.09	15.2473	15.0418	15.5442	14.8892	15.0973	14.3869	14.7796	14.2082	14.1842
IGKV3-20	not-sig	not-sig	#N/A	#N/A	#N/A	#N/A	NA	15.4493	16.2483	16.0717	16.9824	17.0129	15.4218	17.6702	17.2902	17.0344	16.027	16.5826	17.7983	15.248	17.4033	17.1119	16.2865	16.575	17.1302	16.8048	16.3501	16.0986	16.5383	16.1014	17.5428	15.7341	16.0167	16.5921	16.8634	17.3002	16.3469	17.1809	17.278	15.9028	16.9545	17.0809	16.7717	15.4537	17.7282	16.8695	16.9352	19.3865	19.6143
CUL4B	not-sig	not-sig	#N/A	#N/A	#N/A	#N/A	NA	15.5593	14.7344	15.1296	14.9267	15.0903	15.0407	12.3957	14.9706	15.2826	14.9202	15.1241	15.0227	14.6009	14.8793	15.0829	15.318	15.066	15.3568	14.9048	14.9687	15.2863	14.9835	14.6808	14.8429	15.3041	15.2121	15.0248	14.8375	14.8513	14.418	15.1777	14.5551	15.0427	14.8087	14.8886	14.2579	14.6478	14.7014	14.5691	14.9142	14.6241	14.3407
KCTD12	not-sig	not-sig	#N/A	#N/A	#N/A	#N/A	NA	14.6959	13.6407	14.5499	14.965	14.0929	14.4196	12.0237	14.505	14.7497	15.2068	14.626	14.5912	15.0437	14.4259	14.568	15.4765	14.3053	16.4682	15.2417	15.1	14.3887	15.2031	14.3795	16.1131	14.1022	14.5675	14.2193	16.3425	14.7239	15.5065	14.5721	15.5753	14.568	14.7656	14.3495	15.1516	14.965	15.2236	14.5246	14.9137	15.6719	15.3877
CAMK2G	not-sig	not-sig	#N/A	#N/A	#N/A	#N/A	NA	14.4525	14.1813	14.2301	14.0724	14.7191	13.934	14.4136	14.3079	14.4912	14.2754	13.6567	13.8952	15.5088	14.2868	14.0689	13.9623	14.1732	15.3821	13.5288	13.6255	13.5265	14.1125	13.9328	14.2092	13.9094	14.2601	14.4268	14.15	13.1617	13.3872	13.7865	14.6269	13.5181	13.7942	13.9942	12.8105	15.0563	13.6749	13.7865	14.1438	13.8318	13.8107
EEF1E1	not-sig	not-sig	#N/A	#N/A	#N/A	#N/A	NA	13.9449	14.2515	14.139	14.2294	14.1456	14.2766	17.5542	14.0839	14.4628	14.3905	13.7755	14.1677	13.0362	13.825	14.0934	14.4097	14.6006	13.9478	15.015	14.268	14.327	14.8516	13.7893	14.9283	14.1939	14.4348	14.82	15.1251	14.4922	14.8741	14.2544	14.0149	15.4698	14.2065	14.2161	14.7749	14.4549	14.2504	14.0873	14.2288	14.5093	14.3152
ESRRB	not-sig	not-sig	#N/A	#N/A	#N/A	#N/A	NA	13.5108	12.229	14.7735	13.9559	12.629	13.559	12.3303	14.9103	12.9439	14.7123	13.8802	13.5926	15.0996	14.2374	13.0612	13.8532	12.5772	13.4514	14.6862	13.8789	13.8655	12.8661	12.814	13.2998	14.3696	14.0341	13.1454	14.1928	14.1297	13.1881	12.8363	15.5671	16.1353	14.2423	14.2372	14.0116	13.0404	13.4591	12.6476	13.8547	14.0594	14.5101
RPL12	not-sig	not-sig	#N/A	#N/A	#N/A	#N/A	NA	17.863	18.026	17.697	17.6761	17.4462	17.6205	17.802	17.7387	17.9742	17.5764	18.2808	17.9956	17.0025	17.5323	18.1303	17.8033	18.0228	18.1116	17.9605	17.7477	18.2447	17.6927	17.9939	17.8615	17.3053	17.9461	17.8724	17.7562	17.8641	18.0481	17.8271	17.3915	17.149	17.6897	17.9662	17.8182	16.7856	17.2065	17.7226	17.8215	17.6328	17.4956
ALDH1A1	not-sig	not-sig	#N/A	#N/A	#N/A	#N/A	NA	17.2198	15.742	15.7512	16.4368	18.807	15.8635	15.4901	16.697	15.5703	14.943	15.697	15.2954	19.5732	15.0383	17.0143	14.4624	18.7715	17.0848	15.6944	15.6004	14.6101	14.9471	17.1942	15.6941	15.6494	16.9954	15.4077	16.2882	14.7656	16.3155	15.0598	14.8469	14.8924	16.0547	16.5142	16.0165	16.6885	15.1586	15.6548	15.2984	15.7139	15.7258
PTCD1	not-sig	not-sig	#N/A	#N/A	#N/A	#N/A	NA	11.8456	12.517	12.2135	12.5219	10.4526	12.8794	10.3794	11.1117	12.6615	11.9841	11.7205	12.337	12.4664	12.4145	12.1645	11.883	12.6627	11.8702	10.8945	12.6342	12.4066	11.0171	11.9537	12.0183	11.7214	12.5942	13.2469	12.3217	11.1646	10.6393	12.7407	11.5052	12.9605	12.7587	11.5879	11.5832	13.4242	11.076	10.7871	12.7921	10.8299	10.839
VDAC3	not-sig	not-sig	#N/A	#N/A	#N/A	#N/A	NA	16.7994	16.6075	16.4608	17.5513	15.8896	17.3168	16.4523	15.7499	16.7225	16.0977	16.2955	15.9842	16.1923	17.1393	16.3059	16.8529	15.9424	15.2747	16.3756	16.4295	16.4333	16.118	16.5081	16.1389	16.3964	16.7762	16.3409	16.6927	16.3378	16.7355	16.605	15.9542	17.202	16.3249	16.5811	16.0686	17.2588	16.3702	16.1065	16.7074	15.9792	15.947
ETFB	not-sig	not-sig	#N/A	#N/A	#N/A	#N/A	NA	16.4029	16.3902	16.6245	16.5153	16.2036	16.6643	15.8194	17.2129	14.8734	16.2158	16.2785	16.0084	16.2771	16.5939	16.3282	16.7443	15.9578	15.4099	15.7516	16.3725	16.322	15.8987	16.5373	13.827	16.2811	16.8836	15.8544	15.6214	16.2604	16.6341	16.4839	16.9248	16.6741	15.7768	17.2156	15.6332	16.4726	15.9277	15.9413	16.6832	15.8549	16.3667
ADRM1	not-sig	not-sig	#N/A	#N/A	#N/A	#N/A	NA	11.8125	12.3511	12.3602	12.3848	12.6489	12.5711	18.9476	12.0502	13.2984	13.074	11.9779	12.6531	12.1273	12.4172	13.0371	12.7234	13.4923	13.2098	13.0084	12.5212	12.5803	11.8459	13.2095	12.3764	11.8504	13.5404	13.4709	12.2831	12.8057	12.2606	12.8329	12.4692	13.332	12.0073	12.4901	12.9897	12.5068	12.8832	12.872	11.9769	12.5866	12.2357
AHCTF1	not-sig	not-sig	#N/A	#N/A	#N/A	#N/A	NA	14.105	13.172	13.1275	13.284	14.7981	12.8338	17.7261	14.1327	13.8592	13.5438	14.3588	14.3206	13.8635	13.6328	14.3792	13.5455	14.0162	14.2633	14.1336	13.8014	13.657	14.0726	14.22	13.6434	13.8986	13.6033	13.928	13.0563	13.2938	13.753	13.2622	12.9064	13.3584	13.9577	13.7285	13.0544	13.9663	12.5058	13.4857	13.5763	14.2857	15.0847
CAVIN2	not-sig	not-sig	#N/A	#N/A	#N/A	#N/A	NA	14.9684	14.1953	13.2497	13.804	14.5092	12.8562	13.8509	14.353	14.401	14.0142	14.0107	14.0367	14.6064	14.0965	14.484	14.0693	14.3717	13.7072	14.6085	14.2085	14.4987	15.0871	14.1357	13.9211	14.1585	14.0113	15.4147	14.0756	14.1425	14.0768	14.0687	14.2675	12.3015	13.3994	13.1303	15.1407	13.1325	12.5006	14.2761	13.7328	14.9105	14.7323
LCP2	4	IMMUNE	#N/A	#N/A	#N/A	#N/A	NA	12.1693	11.9291	12.8168	12.9874	13.2428	12.2854	13.513	13.0681	13.198	12.1782	13.1886	12.8149	14.2086	11.8796	12.5501	11.7148	12.0743	11.8868	13.9073	12.5717	12.3623	13.7455	12.3604	12.6395	11.9779	11.5358	12.8569	13.7569	12.8882	12.5405	12.5083	13.4493	12.5148	13.3459	12.322	12.8655	12.2628	13.8621	13.2421	11.4371	13.8042	13.1693
TUBB	not-sig	not-sig	#N/A	#N/A	#N/A	#N/A	NA	17.3936	17.7218	18.3014	17.9782	18.2248	17.482	18.7406	18.2064	18.3138	18.5613	18.5307	17.993	18.7095	17.5807	18.3853	18.0014	18.3599	19.2241	18.4688	18.36	18.7592	18.0031	18.3722	18.4502	18.6362	18.8352	19.3647	18.7515	17.9525	19.0191	18.0918	17.9393	18.1851	18.041	17.7904	18.1471	18.4276	18.5942	17.8189	18.191	17.767	17.7644
CD46	not-sig	not-sig	#N/A	#N/A	#N/A	#N/A	NA	14.2707	13.4757	14.6875	14.1723	14.052	13.5695	12.372	13.8231	14.1873	12.7203	11.7412	11.6218	11.7608	13.746	13.7423	14.8963	13.8219	12.6721	14.3832	14.0202	13.9358	11.0358	12.4521	13.9311	11.8964	13.4062	12.9473	14.2544	14.1053	14.6784	13.9386	14.3698	15.2073	12.9685	14.6298	14.4075	12.6401	13.5904	13.6524	14.2016	13.0439	12.3197
NDRG3	not-sig	not-sig	#N/A	#N/A	#N/A	#N/A	NA	13.0151	12.1551	12.371	12.4374	15.8677	13.3889	18.6279	11.5311	12.13	14.2736	12.1507	12.1326	13.7829	13.1829	11.5086	13.132	12.394	13.9523	13.1172	12.6397	12.6045	11.5295	12.2487	12.8038	13.3888	13.3569	12.6326	13.9427	12.7488	14.0478	12.978	12.7294	13.566	12.6425	12.8624	13.2023	13.5027	14.7218	13.122	12.4705	13.3298	9.59233
SRP19	not-sig	not-sig	#N/A	#N/A	#N/A	#N/A	NA	14.5437	13.0749	11.588	13.1943	12.2276	12.9481	11.5061	13.1869	12.9378	11.2724	12.4496	11.3307	12.8501	11.8395	11.5579	12.7115	11.6232	13.3098	11.0357	12.6547	11.1753	11.5701	11.5429	12.4505	10.2356	12.2038	12.9849	13.0046	13.4572	9.25572	10.6023	11.8567	12.7093	11.8987	10.8159	12.3426	11.0033	11.6689	13.5134	12.626	11.4237	10.7041
RPLP1	not-sig	not-sig	#N/A	#N/A	#N/A	#N/A	NA	13.4315	14.7858	14.9799	13.8857	15.8035	14.4951	15.1158	14.8894	16.3301	14.8953	16.061	14.7656	16.1777	16.6706	16.0399	16.6468	15.7064	19.0204	16.1708	16.9403	15.11	15.0058	16.1476	17.4284	15.6231	15.4442	16.1558	15.3208	16.338	16.694	15.7581	15.2655	14.5459	14.0508	14.0135	15.5029	14.8566	15.9699	14.3842	16.3882	14.999	13.5087
CHAMP1	not-sig	not-sig	#N/A	#N/A	#N/A	#N/A	NA	14.1592	13.8576	13.8156	13.3908	14.1612	14.4823	12.6438	13.4763	13.7547	14.4944	13.9203	14.1134	14.1056	13.5883	14.0327	13.9956	14.0289	15.1033	14.0831	14.4696	13.9303	13.6851	12.8699	14.2022	14.8496	14.7972	14.5425	13.7587	13.6792	13.6952	13.7969	13.7834	12.5465	13.53	14.5719	14.5922	13.6374	13.3751	13.8518	14.256	13.6851	13.0616
EMG1	not-sig	not-sig	#N/A	#N/A	#N/A	#N/A	NA	15.5762	15.6158	16.7181	16.6524	15.9138	16.9143	14.9911	15.8502	16.6861	16.5924	16.3806	16.4548	16.431	16.4846	16.5549	15.7435	16.5689	15.0859	16.2418	15.545	16.5714	16.0847	15.6544	16.0239	16.7786	15.9504	16.9486	16.0196	16.1277	15.2088	17.078	16.0172	18.1756	16.036	16.6794	16.4795	16.636	16.1162	15.7389	16.1413	16.0825	15.8617
CD109	not-sig	not-sig	#N/A	#N/A	#N/A	#N/A	NA	12.6598	11.9942	13.2219	13.4976	12.264	9.84775	15.4701	12.9304	14.0184	11.6553	12.2221	13.7791	12.3936	12.5843	13.1229	10.533	11.653	12.4552	12.2907	13.5453	12.8777	11.732	13.7609	12.273	11.2423	13.5124	11.1848	14.0706	13.2574	10.3001	11.9127	11.8528	12.2494	11.7762	13.6656	11.6351	12.9748	14.402	12.1591	12.6891	13.9108	12.8735
FABP3	not-sig	not-sig	#N/A	#N/A	#N/A	#N/A	NA	12.9863	12.8824	15.3766	15.5994	14.0295	13.7518	16.2897	14.9406	13.8385	14.8837	11.5785	13.2395	13.2812	13.4152	12.2047	11.7818	14.5783	11.5865	13.146	9.44066	11.5052	13.7175	12.8368	10.6823	9.68446	11.3213	14.7798	14.6172	13.368	10.5738	11.2902	13.4355	12.1508	14.8882	13.3507	11.7251	11.5029	13.6788	12.0586	11.5719	12.3371	11.8523
PSMD12	not-sig	not-sig	#N/A	#N/A	#N/A	#N/A	NA	15.1431	15.2078	14.9413	15.2648	15.0586	14.6081	15.9869	14.9757	15.5274	14.7023	15.0938	15.1309	14.7022	15.1394	15.5015	14.971	15.6102	14.7554	14.7991	14.7896	15.5266	14.8749	15.4049	15.15	15.302	15.5528	15.406	15.4179	15.3572	15.3685	15.2815	14.5153	15.2059	15.4535	15.2638	15.4077	15.3018	15.1232	15.4399	14.9272	14.8866	15.1271
ADSS2	not-sig	not-sig	#N/A	#N/A	#N/A	#N/A	NA	14.3993	14.9436	14.6745	14.4707	14.6568	14.5144	12.3226	14.9988	15.2262	15.0192	15.0251	15.0443	14.993	14.7704	14.7422	15.004	15.5713	15.6968	15.2593	14.9701	14.659	15.0723	14.8263	15.0257	15.3077	14.9007	14.8336	14.8196	14.6903	14.8511	14.7339	14.7152	14.8398	15.1093	15.473	14.9048	14.9456	14.9561	14.899	14.3763	14.7372	14.5149
CAPN1	not-sig	not-sig	#N/A	#N/A	#N/A	#N/A	NA	17.109	16.7925	16.3324	15.9555	16.7931	16.8908	15.4132	16.1881	16.7892	16.236	16.6854	16.4638	16.0139	16.5848	15.8098	16.2712	16.3631	16.3122	16.3956	16.6268	16.4486	16.4579	16.8708	16.2058	15.9746	17.0151	16.8375	16.6263	17.3454	16.3142	16.7019	16.6888	16.3394	16.8934	16.9008	15.6208	16.3486	16.8075	16.4278	16.9596	16.5202	16.46
METTL7B	not-sig	not-sig	#N/A	#N/A	#N/A	#N/A	NA	16.7031	14.4733	13.8609	15.4913	17.8331	13.4071	14.1205	12.8526	15.3036	13.754	15.862	14.9962	15.358	14.6741	13.4383	14.5598	14.8566	19.0917	17.379	14.827	13.3182	18.3175	13.3279	16.7635	17.1104	13.3638	12.2632	13.3787	13.1236	17.725	13.5357	13.456	18.1779	13.024	13.7359	15.3703	14.3969	12.4553	13.2226	13.4444	14.0087	12.9276
ERC1	not-sig	not-sig	#N/A	#N/A	#N/A	#N/A	NA	13.5105	13.6054	13.655	13.6257	12.6527	13.7301	11.2228	13.4831	13.5936	13.5826	13.8481	13.8555	13.8749	13.5233	13.8186	13.6003	13.6827	15.1169	14.1415	13.9798	13.4616	13.9524	13.6661	13.4093	13.6492	13.8107	14.271	13.9244	13.5748	13.2473	13.2729	13.4077	12.9641	13.2444	13.5641	13.7938	13.8857	13.8902	13.3527	13.9866	14.094	13.5432
ATG2B	not-sig	not-sig	#N/A	#N/A	#N/A	#N/A	NA	13.3432	13.4643	13.519	12.5782	11.4545	12.8441	12.0184	12.6246	12.9199	13.2335	12.8244	12.7417	13.8699	12.7349	12.5297	13.6664	13.3751	11.9603	13.31	12.6084	12.7885	13.9083	12.9039	13.2278	12.1588	13.3559	12.2947	13.1308	12.946	13.0122	13.0419	13.2427	13.56	12.1072	12.9628	13.4053	12.6838	12.8578	12.7904	12.6496	12.3595	12.4554
PDS5B	3	CANONICAL	#N/A	#N/A	#N/A	#N/A	NA	15.409	13.7221	15.0763	13.6049	15.8477	15.3018	13.6516	13.9121	14.7137	15.4004	14.4303	14.422	14.9012	14.6985	15.0301	15.4096	14.8532	14.2712	15.0945	14.4377	14.5659	14.5859	13.8877	14.7922	15.0729	14.8321	14.7542	14.5574	13.9117	14.343	14.7605	14.0977	15.4027	14.5729	14.7847	14.1215	14.4758	13.5911	14.4023	14.6541	13.7589	13.6811
TOMM6	not-sig	not-sig	#N/A	#N/A	#N/A	#N/A	NA	11.1715	14.4464	13.8776	13.7717	13.4423	13.7743	17.4508	13.7533	14.0527	14.6978	14.0932	13.417	14.6342	13.5753	13.5178	13.7609	13.6582	15.2102	13.4369	13.7784	13.4605	13.3164	13.7517	13.7415	14.5159	13.8225	16.022	13.0339	13.4141	13.1518	13.0879	13.0164	16.2587	13.3082	13.3488	13.5699	13.9454	14.4023	13.1734	14.2434	11.9747	14.7754
HSPA13	not-sig	not-sig	#N/A	#N/A	#N/A	#N/A	NA	13.0456	13.8594	13.344	13.5881	14.2401	13.1375	16.5699	14.4298	13.3302	13.9282	13.1604	13.978	13.3812	13.0738	13.215	13.3665	13.2015	14.1795	13.1447	13.7842	12.6585	13.5333	13.7856	13.9568	13.6445	13.0816	13.7638	12.8182	13.3119	13.1228	13.2823	13.4907	14.4848	13.754	13.4661	13.6668	12.9839	13.6735	13.2491	13.6387	13.9585	13.893
FAAH	not-sig	not-sig	#N/A	#N/A	#N/A	#N/A	NA	11.7079	13.0606	12.2965	10.7696	11.314	9.59411	10.2148	11.2639	10.6147	11.5668	11.2241	11.8932	11.9421	12.3295	10.4904	12.8188	13.6397	13.3071	11.1073	11.0008	12.0441	11.3936	10.1767	12.5479	12.1733	10.1235	12.6016	10.1074	11.9444	9.38305	10.569	11.837	12.0181	11.9538	13.6323	11.1973	11.0123	12.8554	11.1303	13.5118	11.8591	10.0285
CYP51A1	not-sig	not-sig	#N/A	#N/A	#N/A	#N/A	NA	14.793	14.4959	15.2847	14.9179	14.784	14.8705	12.5793	13.7771	15.4735	14.5788	14.8927	14.9269	13.6244	15.009	14.635	14.2093	15.3081	16.057	14.9907	14.8075	15.1827	12.2404	15.2812	15.1091	15.4191	14.4015	15.1511	14.7498	15.5215	14.4959	15.6468	15.3843	15.0609	14.5846	14.246	15.26	14.8037	14.9169	15.3336	15.0201	15.0592	15.309
IGHV5-51	not-sig	not-sig	#N/A	#N/A	#N/A	#N/A	NA	13.4909	14.3713	11.696	14.1164	15.2838	11.8274	14.522	13.3198	13.037	13.1328	11.9392	14.6222	13.6106	14.2151	13.7044	13.8022	13.9621	13.9094	13.8778	13.3849	12.3206	14.0619	12.2018	12.7148	13.2027	12.9074	11.8892	13.5868	13.9302	13.5426	14.1473	14.1188	14.2638	13.3244	14.3988	13.4794	13.6376	15.0674	13.9943	13.5134	16.6329	15.6004
SLC27A1	not-sig	not-sig	#N/A	#N/A	#N/A	#N/A	NA	13.1641	12.9626	12.8261	12.953	13.2938	14.84	13.8445	13.6773	13.1295	12.9674	12.8964	13.1888	12.9964	12.3732	12.769	12.0795	12.3737	13.0983	12.5361	12.9883	12.6127	13.1048	12.5734	12.0227	12.7053	12.8382	11.8774	13.5713	12.8349	14.0967	12.9778	12.6415	13.0237	13.1466	14.8909	13.5533	13.365	12.502	14.3511	12.2921	13.7712	13.1673
PDLIM1	not-sig	not-sig	#N/A	#N/A	#N/A	#N/A	NA	15.6216	14.6067	15.555	15.3331	14.8209	15.4715	15.3639	14.4691	15.1668	15.5607	15.7405	15.4276	15.1936	15.9168	15.3952	16.1788	15.3864	14.142	15.9498	15.8458	15.5594	15.7532	15.789	15.6568	16.0208	15.8786	15.4675	15.3845	15.7678	15.3055	15.2566	15.6959	15.5061	15.3962	15.6922	15.6164	15.6194	14.544	15.6115	15.4581	15.7921	15.804
SPINT1	not-sig	not-sig	#N/A	#N/A	#N/A	#N/A	NA	14.6511	14.7396	14.349	14.6977	15.0832	14.319	11.0128	14.6403	13.129	14.1874	14.3383	14.211	13.9758	14.5828	14.6202	14.4881	14.6245	13.8069	13.9231	14.3779	14.8412	14.1623	14.6181	14.6343	14.3625	14.5491	14.4101	14.3102	14.9607	14.7184	14.4429	14.4366	13.6481	14.5491	13.3381	14.4816	14.235	14.5758	14.6629	14.5724	14.7426	14.2257
BTF3L4	not-sig	not-sig	#N/A	#N/A	#N/A	#N/A	NA	14.0582	14.0419	14.268	13.8657	13.7169	13.6723	10.2373	13.8043	13.9921	13.8713	13.8399	13.9952	14.392	13.5003	13.7223	13.999	13.7908	14.5826	14.6251	14.0786	14.1191	14.5915	14.1399	13.9295	13.6134	13.903	13.939	13.8732	14.1161	14.4021	14.2305	14.3208	14.4096	14.4165	13.5894	14.1972	14.4873	13.7368	13.9934	13.6249	13.8337	13.9269
SH3BP1	not-sig	not-sig	#N/A	#N/A	#N/A	#N/A	NA	13.9447	13.2274	13.7581	13.4718	12.2327	11.6185	13.9463	13.1143	13.3874	13.344	13.275	13.4235	12.991	13.1411	13.8735	12.8371	13.9218	13.4051	13.4301	12.9766	13.293	13.0118	13.3157	13.4327	13.1665	14.0672	12.7997	13.5448	13.6448	13.47	13.0681	13.74	12.3624	13.4073	13.712	13.3277	13.8704	13.7552	13.2564	14.333	14.6278	13.3584
PLPBP	not-sig	not-sig	#N/A	#N/A	#N/A	#N/A	NA	13.5322	14.0618	13.5252	13.8328	14.8285	13.7381	11.6836	13.7458	13.795	13.2762	14.1154	13.1758	13.565	13.448	13.8797	14.1189	13.1446	14.9388	14.2382	13.856	14.2607	12.4892	14.322	13.7736	13.9929	14.8509	13.7284	14.1668	14.212	13.7557	13.8981	12.8517	14.7502	13.0425	13.6145	13.5997	13.7252	13.7101	13.3017	12.736	14.315	13.7482
PITPNA	not-sig	not-sig	#N/A	#N/A	#N/A	#N/A	NA	12.9226	13.1418	13.417	13.1182	13.0541	12.8981	16.9005	12.9174	12.9752	14.3668	13.2349	13.771	13.5688	13.3354	13.2194	13.4667	12.5921	13.4104	13.6939	13.0495	13.3328	13.6647	13.5932	13.7177	13.3274	12.8643	12.5529	13.587	13.3296	13.2793	13.2253	13.9309	12.1462	13.5873	13.7741	13.3139	13.0655	12.793	13.8807	13.2215	13.9738	13.527
FUT6	not-sig	not-sig	#N/A	#N/A	#N/A	#N/A	NA	13.8903	13.807	12.3213	14.3658	15.9581	12.804	13.6757	14.3092	13.5621	14.0506	13.6851	13.7263	14.0697	13.6753	11.9889	14.8258	14.6828	14.1564	12.4685	13.8626	12.3791	12.0623	14.2394	13.7997	11.8531	13.0335	13.7104	14.1224	14.4198	13.4447	8.83836	15.016	13.4829	13.9665	13.9289	14.3918	16.0807	12.4822	14.2907	14.1517	15.3903	14.6412
NUP62	not-sig	not-sig	#N/A	#N/A	#N/A	#N/A	NA	14.0241	14.0219	14.3269	13.408	14.1441	14.4896	17.5373	13.8663	13.9825	14.3495	13.6914	14.1516	14.1588	14.1241	14.0526	14.4672	13.9071	14.6798	14.5011	14.4173	14.1306	13.9965	13.843	14.0164	14.0801	14.133	14.8278	14.0956	14.1893	14.2047	13.8352	13.9626	14.4872	14.1495	14.573	14.035	14.1481	14.2237	13.7332	14.0271	13.7313	13.4638
ECI2	2	METAB	#N/A	#N/A	#N/A	#N/A	NA	12.6556	13.1014	11.9977	13.9882	13.8988	12.2196	17.5569	13.5813	12.6898	13.1289	13.1937	12.0997	14.0822	13.0373	12.7688	13.0007	13.4484	13.94	12.1357	12.8475	12.0688	13.4295	12.8496	12.907	12.416	11.0603	13.9455	12.2654	12.2308	12.526	12.5649	11.6134	14.0138	12.4894	12.2004	13.0429	12.0456	13.3811	12.8167	13.0034	12.7151	12.2641
EPS8	not-sig	not-sig	#N/A	#N/A	#N/A	#N/A	NA	13.7301	13.3612	14.1256	13.1471	14.6495	14.5517	11.7943	13.3947	14.2202	13.4413	13.9221	13.9048	13.236	12.7808	13.8293	14.0266	13.6839	14.7151	14.0269	13.8502	14.0436	14.3689	13.9851	13.451	13.3506	15.409	15.1743	13.8481	14.05	13.3094	14.5377	13.1678	15.0329	13.944	14.2911	14.106	14.4982	13.1335	13.479	13.6808	13.7688	12.8448
NDUFA6	not-sig	not-sig	#N/A	#N/A	#N/A	#N/A	NA	11.7359	12.2461	12.808	12.5101	12.3338	12.7813	11.7413	12.131	12.2179	12.7721	12.0749	12.5031	12.7784	12.7383	12.2869	11.7789	12.0876	13.165	11.7369	12.9988	11.9657	11.6911	12.2771	11.9866	12.8644	9.9693	12.3933	11.835	11.6411	13.2022	11.9117	12.457	10.021	12.2504	12.6561	11.9457	12.5364	12.4608	12.0112	12.0638	12.997	12.1039
NT5DC3	not-sig	not-sig	#N/A	#N/A	#N/A	#N/A	NA	12.8684	12.2115	12.0708	12.2513	12.6604	11.7652	12.1831	13.4219	13.0492	12.7841	12.6046	13.5392	14.1161	12.2735	13.8349	12.6733	12.1455	14.7826	12.693	12.8589	12.8249	13.9258	12.924	14.0164	11.5474	12.443	10.9128	13.0156	12.8153	10.4074	12.0902	12.8991	11.854	12.6157	12.467	13.038	13.3711	14.0961	13.5305	12.2123	14.0492	13.0413
PBK	not-sig	not-sig	#N/A	#N/A	#N/A	#N/A	NA	13.6966	13.0502	14.6098	12.7378	13.9065	10.8458	12.9413	13.9158	12.0717	12.4825	12.9406	13.1297	13.8025	10.5007	14.2227	11.3563	12.3225	11.6416	14.2448	13.6366	14.4712	13.034	13.5641	12.0733	13.0931	14.4726	14.6927	14.0245	14.2656	11.5257	12.1442	11.173	14.597	13.2948	11.3131	15.0838	9.2547	14.0497	12.4814	11.842	11.7523	10.7022
RAB8B	not-sig	not-sig	#N/A	#N/A	#N/A	#N/A	NA	15.5978	14.5796	14.5709	14.2841	14.0789	12.9276	14.0354	13.5749	14.0917	14.4449	13.8773	14.2124	15.4099	12.9991	13.1656	14.9729	14.3361	15.2919	13.8062	13.9929	13.9278	13.8723	13.4314	13.6298	14.7041	13.6296	14.4057	14.173	13.7885	15.1717	13.396	13.6048	14.7408	14.1152	13.9662	15.1638	13.9339	15.7737	14.735	13.5623	14.5285	14.5387
CAMP	4	IMMUNE	#N/A	#N/A	#N/A	#N/A	NA	12.9779	12.1083	13.4734	14.0674	16.3319	14.7413	18.0618	16.0856	15.5867	13.3808	14.178	15.2409	13.4749	14.2235	14.396	12.9313	15.1644	14.285	14.0982	12.7644	13.5174	16.4341	14.076	14.5776	14.5754	11.4639	13.9494	12.522	13.8563	15.1333	13.1012	13.2311	14.2653	15.177	14.6371	15.3781	14.78	15.7637	15.2216	12.1507	15.7116	14.5933
DDX19B	not-sig	not-sig	#N/A	#N/A	#N/A	#N/A	NA	12.4889	12.9445	13.4524	11.9421	11.5314	12.7974	12.5101	12.6602	12.4371	13.5033	12.1944	12.1462	13.4121	12.9779	12.7965	13.3831	12.6039	13.4949	12.8106	13.5017	11.9192	12.8135	10.872	12.9991	13.1194	12.9286	13.1933	13.245	12.7972	12.5126	12.9284	13.5412	13.3105	12.2498	12.0989	12.7108	13.5434	12.633	12.862	12.7308	11.6575	13.0697
TAPBP	not-sig	not-sig	#N/A	#N/A	#N/A	#N/A	NA	15.0093	12.7002	14.032	14.1755	13.0137	14.295	13.9256	14.0207	14.0975	15.0268	14.0666	14.7092	13.236	14.7216	15.156	14.7149	13.8309	13.245	15.4942	13.7637	14.4169	15.27	14.8794	14.7954	13.9489	14.4423	13.9261	16.3058	14.8169	14.828	14.4761	15.217	15.021	15.7516	14.7197	14.2661	14.2085	14.6471	15.0895	16.2194	15.0216	14.482
STOM	4	IMMUNE	#N/A	#N/A	#N/A	#N/A	NA	16.2711	15.932	16.7256	16.9543	17.7333	16.7176	16.2616	17.7107	16.5686	17.2088	16.2822	17.0061	16.7262	16.4264	16.5806	16.7485	16.6925	17.0955	16.2581	16.1156	14.7999	18.3824	15.5747	16.185	17.1702	15.2594	15.67	15.9263	16.2553	16.7594	16.4748	16.3628	16.2785	16.793	16.1984	16.1737	18.0886	17.8648	16.4699	16.1571	17.9098	16.9143
LPCAT4	not-sig	not-sig	#N/A	#N/A	#N/A	#N/A	NA	13.0222	13.3058	12.9724	13.1152	13.4578	13.1294	13.5211	12.695	12.1166	12.9646	12.369	12.5437	13.461	13.1848	13.8196	13.2921	13.239	12.2516	12.7212	12.7324	12.3642	13.9913	12.1814	13.6252	12.2525	12.9836	12.2078	12.5482	13.6253	14.077	12.9101	13.8413	14.0764	13.2392	10.8108	12.9882	13.823	13.8679	13.5367	12.6387	13.9512	13.2895
DDX20	not-sig	not-sig	#N/A	#N/A	#N/A	#N/A	NA	13.1191	12.3387	13.1695	13.0913	12.7617	13.1618	14.0124	12.5899	13.9005	13.2546	13.6734	13.4012	13.1763	12.7647	13.5114	12.8365	13.3959	12.5536	12.9653	13.4435	13.3554	13.5557	13.185	12.4344	13.6627	13.1717	11.8916	12.9896	13.1042	13.1664	13.8084	13.0003	12.6448	13.1904	12.1838	12.9377	13.2075	12.4396	13.4672	12.8939	12.489	11.787
IGHV3-7	not-sig	not-sig	#N/A	#N/A	#N/A	#N/A	NA	14.3779	14.7927	14.7565	15.2651	15.0195	14.632	11.7446	17.3714	14.8137	14.4387	14.8705	15.4791	15.4155	15.5225	15.0029	14.7292	14.8603	14.1573	15.0472	14.9012	14.804	15.2337	14.6669	15.3827	14.2935	14.7767	15.4019	15.1412	14.6949	15.0366	15.0487	15.8267	14.3261	15.4415	15.3269	15.175	14.8652	15.6045	15.5508	15.1469	16.4478	16.2366
VILL	not-sig	not-sig	#N/A	#N/A	#N/A	#N/A	NA	15.6695	14.5065	16.3048	17.2332	17.4963	16.0751	17.9535	17.8541	16.2892	16.2663	15.8143	15.511	16.6282	15.7395	15.1733	15.5319	15.6047	15.6667	17.4585	15.4497	16.1161	17.2304	15.2539	15.3119	16.4083	14.4279	15.4027	15.0335	15.1302	15.8482	15.5438	15.7408	13.1581	15.6279	15.2725	15.3394	16.6392	15.1669	15.6994	15.4757	16.9006	16.8831
PPAN	not-sig	not-sig	#N/A	#N/A	#N/A	#N/A	NA	12.0135	13.4052	12.9413	12.8109	12.0635	12.9594	12.4104	10.9058	12.9537	12.8953	12.8572	11.5945	13.5688	12.3599	12.354	12.0181	12.5394	14.4128	12.6019	12.5384	12.4447	13.5088	12.1544	12.3484	13.0647	11.5076	13.136	12.9585	12.6245	10.9856	12.1701	11.4718	12.3023	11.4852	11.2883	13.0059	13.268	14.1259	11.2368	12.1774	11.6426	10.962
TMPO	not-sig	not-sig	#N/A	#N/A	#N/A	#N/A	NA	16.0006	15.6352	16.6692	16.0761	16.6382	16.2694	15.6113	14.7704	16.5239	15.4293	15.6182	16.1184	15.7592	15.5692	16.4969	15.7799	15.648	15.0071	16.2926	16.1159	15.5942	14.9119	16.2091	14.9323	15.82	16.4007	15.6048	15.8107	16.3824	15.5433	15.8731	15.6299	16.5532	15.5781	16.0142	16.3613	15.3157	15.8393	16.0639	16.0251	15.4981	15.1307
PRUNE1	not-sig	not-sig	#N/A	#N/A	#N/A	#N/A	NA	13.5502	13.254	13.2871	13.829	13.8319	13.5745	13.3879	13.224	11.5667	13.1133	13.5929	13.3559	13.4549	13.263	13.3039	13.4458	13.0315	13.9855	12.7779	13.7119	13.4837	12.8133	13.2473	12.6281	11.7744	13.4321	10.3405	13.3785	12.6179	13.1103	12.8326	13.262	12.8522	12.1403	13.5794	12.9198	11.6729	12.0279	13.2615	13.7194	12.5199	13.4007
RPL10A	not-sig	not-sig	#N/A	#N/A	#N/A	#N/A	NA	17.1477	17.1653	16.809	17.078	17.0705	16.8598	17.0757	16.8325	17.1325	16.8797	17.1665	17.0476	16.4705	16.9957	17.4961	16.8099	17.4771	16.0362	16.9031	16.7531	17.4061	16.6069	17.4782	16.9822	16.9209	17.3427	17.1964	17.247	17.376	17.4677	17.2354	16.7589	16.8317	17.1823	16.8792	17.1963	16.7331	16.6659	17.3054	17.3052	16.7082	17.1819
CDKN2AIP	not-sig	not-sig	#N/A	#N/A	#N/A	#N/A	NA	14.2785	13.4357	14.1793	13.9233	12.6405	12.8052	13.0162	13.2568	14.4483	14.3396	14.2664	14.1877	12.69	12.831	14.5536	14.239	14.0402	13.6213	13.1098	13.9953	14.3013	13.2278	14.9366	13.8817	14.9204	14.3168	12.4337	14.3638	14.641	12.8236	14.0686	13.7449	13.3768	13.3257	13.3871	12.4736	13.1844	13.0064	14.5625	14.765	14.4634	12.0519
SRRM2	not-sig	not-sig	#N/A	#N/A	#N/A	#N/A	NA	16.8715	16.3248	16.8325	16.3918	16.5137	16.6674	13.7999	16.5235	15.6748	16.4037	16.7003	15.678	16.7999	16.6099	16.879	16.612	16.0612	16.1577	17.1476	16.9229	16.6705	16.0169	15.7765	16.5377	16.9175	16.7577	16.2021	16.6447	16.8805	14.6246	15.3174	16.6196	15.5875	16.3779	16.2543	16.643	15.9022	16.1755	16.6153	16.6403	15.5129	16.3275
MYBBP1A	not-sig	not-sig	#N/A	#N/A	#N/A	#N/A	NA	14.0326	15.4855	16.1123	15.1018	14.6856	15.9731	15.1949	14.8058	15.6286	16.0507	15.5074	15.8111	15.9513	15.64	15.6894	15.0808	15.7915	15.2477	15.3525	14.8331	16.0732	15.2117	15.39	14.41	15.9169	15.6268	15.3877	16.2375	15.9696	15.2603	15.3427	13.9211	15.4846	14.8649	15.6996	15.0617	15.8571	15.5096	15.1425	15.6152	15.0121	14.4333
ETF1	not-sig	not-sig	#N/A	#N/A	#N/A	#N/A	NA	17.1154	17.2509	16.6774	17.0787	16.2138	17.0662	16.2907	16.5148	17.2085	16.9489	16.9548	17.4367	16.3534	17.0005	17.2022	17.1004	17.0114	16.3184	17.1978	16.8503	17.1754	16.5781	16.9975	16.9419	16.9016	16.5471	16.4338	16.8684	17.0223	17.009	16.8022	15.9638	16.6721	16.9995	17.2298	16.7688	16.6241	16.7515	16.6537	15.9354	16.6982	16.7712
UGDH	2	METAB	#N/A	#N/A	#N/A	#N/A	NA	17.2823	16.4152	15.6284	15.9879	14.6624	15.2557	15.913	15.8243	15.0665	14.8101	15.5952	15.8463	15.6644	15.5832	15.3889	15.0273	16.0312	15.808	14.5568	15.3561	15.4396	14.4176	16.3614	16.3667	16.1268	15.8813	15.6243	15.1068	15.6516	15.1632	15.6038	15.6157	15.7808	15.9726	15.2359	13.6606	15.7051	15.9025	15.9667	14.9666	15.8358	16.0935
PRKRA	not-sig	not-sig	#N/A	#N/A	#N/A	#N/A	NA	13.0984	12.7103	12.8182	11.2261	12.357	12.0662	14.1202	13.325	11.66	11.269	14.0305	12.0185	11.5469	11.429	12.1505	12.618	11.9553	12.2411	12.5539	12.9113	13.1545	13.2706	12.2034	12.4459	12.1433	14.2537	14.9816	13.0261	12.728	13.3604	12.787	12.4982	12.2989	12.8073	14.0883	13.6612	13.9342	12.2976	12.6239	13.5684	12.5537	12.4253
PFDN4	not-sig	not-sig	#N/A	#N/A	#N/A	#N/A	NA	14.638	14.3817	14.7754	14.97	14.7806	14.398	15.9162	15.1139	14.8058	14.8229	14.5537	14.1536	14.8816	13.9762	13.3672	14.4836	14.8886	15.4584	14.7187	14.9003	14.41	14.7203	14.1901	14.2003	14.772	14.5369	15.3216	13.9099	14.2877	13.759	14.1654	14.4973	15.8009	14.6971	14.1582	14.1876	14.4259	14.7014	13.5799	13.9867	14.2303	14.5549
PALS2	not-sig	not-sig	#N/A	#N/A	#N/A	#N/A	NA	12.9185	11.5748	12.5562	13.4342	13.8912	13.0001	11.5092	13.1927	13.4272	14.1148	12.9413	13.9589	14.5336	12.7889	13.072	13.0912	12.9976	12.3211	12.906	14.1414	13.2342	14.8754	13.2689	12.6817	13.756	12.4785	13.3395	12.4418	13.0692	13.8906	13.5943	12.8247	13.3347	12.7572	11.2644	8.93231	13.0614	12.9986	14.0262	13.2076	12.4253	13.2633
AFAP1	not-sig	not-sig	#N/A	#N/A	#N/A	#N/A	NA	13.581	13.4733	11.916	13.7291	12.7292	13.2849	13.8712	12.0764	12.8494	12.1555	13.468	13.5053	12.986	13.1568	12.7569	12.5839	12.4508	13.2618	12.9019	12.9032	13.219	14.2517	13.1774	12.7679	13.1275	13.7536	13.7337	13.0349	12.7912	13.704	13.1389	13.6629	13.4192	13.6271	11.1612	13.9049	14.0287	13.1358	13.2373	12.9656	11.8706	13.2655
RAB23	1	EMT	0.300926	0.0717721	1.97737	0.0689074	NA	13.7645	13.724	12.7773	13.3855	14.5103	14.0917	13.0351	13.6997	13.0462	13.079	14.0881	13.6245	14.2557	13.7663	12.8393	13.0878	13.2222	12.6121	13.9452	13.0861	13.9153	14.4686	13.3541	13.0364	12.9951	12.5149	11.8	13.841	13.23	14.1115	12.0188	13.8527	14.4807	12.097	13.0584	13.7647	13.97	13.7927	13.1657	12.6317	14.2763	13.6143
GFPT1	not-sig	not-sig	#N/A	#N/A	#N/A	#N/A	NA	13.7272	15.252	14.7168	14.5025	16.135	14.0873	16.1823	15.6007	14.5781	16.8166	15.5164	15.7599	15.2736	15.5423	15.0524	15.5276	16.0907	15.4541	15.8352	15.4082	14.6459	14.5638	15.547	16.3829	15.2697	14.9358	15.5697	15.6931	16.3712	14.4471	14.7151	15.3076	15.9918	15.4765	15.2973	15.1705	15.7247	15.8777	15.0925	15.1447	15.1704	15.8227
SLC7A1	not-sig	not-sig	#N/A	#N/A	#N/A	#N/A	NA	13.9393	12.9936	14.005	14.6518	14.9997	13.2105	14.0768	14.5619	14.9404	12.6301	14.6963	14.5405	14.761	14.8181	14.8817	14.8936	14.679	12.7997	14.5699	14.1237	13.9605	14.1681	14.2745	14.5021	15.1151	13.838	14.3756	13.9271	14.1316	12.5763	14.425	14.3406	15.5108	14.4851	14.2457	14.2757	13.5745	14.0935	14.0141	14.0128	14.5508	13.8972
COBLL1	not-sig	not-sig	#N/A	#N/A	#N/A	#N/A	NA	13.7509	12.2246	13.7422	14.3457	12.145	13.3773	12.0649	13.8301	13.259	13.5214	13.5436	13.42	13.4401	13.0986	12.0451	13.6719	13.1337	14.019	13.6048	13.5673	12.8407	13.5358	12.9225	11.7361	12.818	13.7487	14.2178	12.994	13.0861	12.3149	13.1615	12.3972	13.202	12.3631	13.3188	12.1006	13.7254	11.5379	13.6187	12.8591	11.8512	10.3855
ABHD14B	not-sig	not-sig	#N/A	#N/A	#N/A	#N/A	NA	16.9576	16.3192	15.7666	16.6916	15.794	15.2774	16.4293	16.3481	15.5924	15.6952	15.4955	15.2986	16.1846	15.7218	15.4577	16.0883	14.5564	15.6494	15.1236	15.5441	15.8948	14.894	14.9401	15.572	15.342	15.2741	15.2755	14.7776	15.3924	15.3886	15.9377	15.6564	16.4374	15.3957	15.2472	14.9629	15.8833	14.5012	15.2955	15.3426	15.5353	15.9244
TATDN1	not-sig	not-sig	#N/A	#N/A	#N/A	#N/A	NA	13.6922	14.0157	12.7817	13.4318	14.1851	13.0045	13.0146	12.1307	13.4735	13.8517	13.1526	12.8903	13.6403	13.8047	13.5265	13.4797	13.186	13.1745	13.1481	13.1197	13.6221	12.8786	13.7332	13.8134	13.8297	13.6253	12.169	12.8426	13.1297	13.2172	13.7688	12.2689	12.2166	12.8689	13.05	10.1399	13.5957	9.52519	13.1803	13.2597	13.4573	13.716
TAGLN2	not-sig	not-sig	#N/A	#N/A	#N/A	#N/A	NA	16.9859	17.3616	16.8865	16.6653	15.9125	16.4848	16.4863	16.603	16.7437	17.0622	17.2695	17.041	16.5739	16.2489	16.4348	16.7706	16.6901	18.6954	17.1479	16.712	16.6354	16.9698	16.7596	17.2003	16.2498	16.0291	17.2502	16.9535	17.2661	16.7027	16.7489	17.2874	16.689	17.1523	16.79	17.1752	16.9825	17.4402	16.8487	16.8693	16.6213	16.747
ZFPL1	not-sig	not-sig	#N/A	#N/A	#N/A	#N/A	NA	11.632	12.9778	11.9441	12.5975	12.8862	12.5226	12.729	11.6068	11.3472	8.74188	12.8162	12.5117	11.3877	11.5957	12.5158	12.1473	12.6235	10.6998	11.6697	12.52	11.7414	11.9337	12.3921	11.5544	11.2644	12.5991	11.002	12.4951	12.9563	13.5501	12.9039	11.4312	11.9313	12.8093	13.4245	12.6467	11.8165	11.1076	12.4943	12.2101	10.7381	13.1795
PARK7	not-sig	not-sig	#N/A	#N/A	#N/A	#N/A	NA	17.0228	16.0251	15.7928	16.1256	15.5349	15.7953	15.2212	16.4552	16.2804	16.0496	16.0171	15.7024	16.0987	15.9925	15.9935	16.6455	16.2419	17.1713	15.8593	16.2796	16.2836	15.7215	16.0992	15.762	16.2203	16.0694	16.2338	16.1827	16.4743	16.1852	16.2745	16.7798	17.095	15.8344	15.9136	16.0722	16.7572	16.6081	16.0972	15.9633	15.8274	16.2523
AIMP1	not-sig	not-sig	#N/A	#N/A	#N/A	#N/A	NA	14.4042	14.2755	14.0405	13.9262	14.109	14.2491	15.6797	13.9932	13.8953	14.0426	13.9665	13.7641	13.8927	13.8312	14.249	14.0996	14.1392	14.2931	14.0088	14.1098	13.8496	13.2511	14.1793	13.46	14.0183	14.1053	14.4752	14.2069	14.1583	13.4945	14.0069	14.3316	15.125	14.399	14.2141	14.2487	14.0721	14.1267	14.2335	14.4348	13.1432	13.8941
FABP5	not-sig	not-sig	#N/A	#N/A	#N/A	#N/A	NA	14.3586	16.9704	16.1658	17.0615	15.7243	17.3995	16.3754	16.5675	17.2424	16.5602	15.9595	16.4259	16.7516	16.7245	17.2189	16.3219	15.8947	15.0399	16.5037	16.6396	16.9899	17.1124	17.6695	16.4646	16.5251	15.8737	16.8711	17.6512	16.7705	15.7206	16.3724	16.1516	17.0398	17.2241	16.1064	16.1736	17.1585	16.255	16.8295	15.6594	16.4897	16.7311
BCAM	not-sig	not-sig	#N/A	#N/A	#N/A	#N/A	YES	14.3885	14.5459	14.1596	14.4386	13.5869	13.2553	14.3278	14.9656	13.7501	13.8502	13.7671	13.8531	14.3172	14.1134	14.0759	14.0538	15.25	11.4959	13.3507	13.1715	14.4848	14.5107	14.1614	13.1058	13.7301	14.6876	14.2131	13.3881	13.6248	16.3519	13.7255	13.6059	15.6336	14.5907	12.3612	14.2557	13.131	12.6933	14.5768	14.1823	14.3203	14.9232
ADAR	not-sig	not-sig	#N/A	#N/A	#N/A	#N/A	NA	14.7825	14.7221	14.6367	14.993	14.6727	14.6499	15.9685	14.3589	14.7175	15.4538	14.7739	14.6593	14.6096	15.2662	15.2907	14.6027	15.3445	15.2136	14.9235	15.0184	14.5771	14.0562	14.5353	14.7448	14.7673	14.8246	14.225	15.1405	14.8405	14.4831	14.5104	14.4643	14.042	14.2833	15.6234	14.5826	14.4229	14.7209	14.395	15.3119	14.2494	13.6506
DLAT	2	METAB	#N/A	#N/A	#N/A	#N/A	NA	14.8897	14.9643	15.7225	15.5947	15.4802	14.7174	15.6817	15.803	15.3311	16.3975	15.1475	15.0158	15.7872	15.3872	14.4513	15.1572	14.799	16.0316	15.5335	15.4046	15.1478	14.8897	14.8808	15.1097	15.607	15.4191	14.3789	15.193	14.7694	14.9336	15.4203	14.7329	14.8221	14.8625	15.3001	14.537	15.3946	14.8486	14.7468	14.4967	14.8234	14.804
TCN1	not-sig	not-sig	#N/A	#N/A	#N/A	#N/A	NA	16.6026	15.6456	17.017	16.6071	16.4852	16.6379	12.7219	17.0192	16.7586	17.1206	15.2493	16.117	13.7808	16.5301	13.7574	16.8861	16.3097	14.6473	16.9905	17.0642	16.9276	15.633	16.8241	16.8018	17.3644	16.8392	9.41035	14.3147	17.0524	16.8656	16.3341	16.809	14.3856	15.7504	14.7038	15.9231	15.9426	15.3414	16.7516	13.9738	16.1958	16.6663
RIPK3	not-sig	not-sig	#N/A	#N/A	#N/A	#N/A	NA	11.6894	13.0576	12.0589	11.2992	13.7023	13.0501	11.4254	11.7721	11.8972	12.1064	11.0352	11.7954	11.7419	13.0775	12.8646	12.5359	12.4427	11.637	12.3707	12.7365	10.6299	11.3752	13.0662	11.8026	11.0698	13.1355	11.1442	12.6598	11.7384	14.6309	11.9943	11.4794	12.6627	12.2262	12.3996	12.7973	12.7617	11.7386	12.3904	13.0558	13.0028	11.3481
COL28A1	not-sig	not-sig	#N/A	#N/A	#N/A	#N/A	NA	11.2463	12.1784	11.8034	11.5958	12.9727	11.8633	11.6148	11.7055	12.6626	12.3025	11.6675	13.2463	11.3742	11.7347	12.8265	11.9303	12.7339	12.4888	11.8676	12.1244	11.5718	11.9142	12.8033	12.1478	12.6212	12.4834	12.7357	11.3543	11.5252	12.3425	11.301	10.1273	14.0675	11.4627	11.9953	10.7908	12.7185	12.598	11.3192	11.0161	13.6377	13.3138
LTF	4	IMMUNE	#N/A	#N/A	#N/A	#N/A	NA	14.4847	16.065	17.1226	16.9854	18.523	18.4175	17.2067	19.3965	18.3106	16.7684	17.2738	16.8112	15.6541	17.547	16.9786	16.6941	17.6058	18.2334	17.4408	15.9896	16.4153	19.5735	16.7945	17.4539	17.9011	14.0076	17.694	16.0572	16.998	18.0606	16.9798	16.8241	17.171	17.9224	17.656	18.2506	18.2675	19.211	18.2445	15.8919	18.4508	17.7521
U2AF1	not-sig	not-sig	#N/A	#N/A	#N/A	#N/A	NA	14.5693	14.1052	14.9541	14.2474	15.1716	15.177	15.6347	14.7667	15.2229	14.4502	14.6887	14.2822	14.3088	14.65	15.04	14.8194	14.8992	14.8171	14.8161	14.5221	15.0183	14.251	14.7126	14.5232	14.5993	15.3349	15.1072	14.7495	15.2898	14.9036	15.2637	15.1077	14.4903	14.8891	15.0737	15.1433	14.1209	14.9698	14.8255	15.9039	14.4653	14.9761
PDLIM7	1	EMT	0.340763	0.0992691	1.70051	0.0716781	NA	16.0128	14.1155	15.2535	16.0189	14.7142	14.8058	15.7987	15.3866	15.7989	14.5524	15.6892	15.2089	16.1558	15.2266	14.8717	14.7655	14.4915	15.9521	16.0562	15.4155	15.4003	16.811	14.1969	15.485	14.7773	14.9925	15.0203	15.249	15.6909	15.7261	14.6308	17.3678	15.4082	15.4342	14.4222	15.9314	15.8304	14.8411	16.0633	15.3825	17.509	17.5134
PSMB9	not-sig	not-sig	#N/A	#N/A	#N/A	#N/A	NA	16.1172	15.4178	14.7409	15.4321	14.2904	15.9305	17.1855	14.7371	15.0198	16.253	15.3505	16.1042	14.5575	15.3052	15.8394	15.4861	14.7839	16.255	16.2044	14.3432	14.7656	15.8886	15.5035	15.6713	14.6261	13.8432	15.4223	16.208	15.56	16.3327	15.8778	16.1818	16.2655	16.8085	15.5138	15.3756	16.0838	17.1265	15.0178	15.3217	15.9904	15.5688
TUBB4A	not-sig	not-sig	#N/A	#N/A	#N/A	#N/A	NA	14.8447	15.3267	15.3934	13.3874	13.9134	15.1506	16.5164	13.8739	15.2781	15.0208	15.3247	14.973	15.3453	14.7567	15.4999	15.6617	15.3344	16.5042	15.0419	15.0845	14.7933	15.4244	14.5907	15.5775	16.0087	15.6103	15.4113	15.4732	15.478	14.8837	15.0056	14.8752	14.5828	15.1964	14.8725	16.1628	15.1153	15.6974	15.0055	14.5161	14.1222	14.2292
PRTN3	4	IMMUNE	#N/A	#N/A	#N/A	#N/A	NA	14.3985	15.4645	17.5132	16.8233	19.4727	18.6405	16.722	19.3743	18.0905	16.8054	17.1526	17.043	15.2979	17.3137	17.0476	16.2339	17.1071	17.8362	17.169	15.3361	15.3806	19.272	15.9631	17.7618	17.8524	13.224	16.5959	15.5296	16.6088	17.408	17.2252	16.3938	16.5331	18.8496	17.3524	17.6537	18.1995	19.9082	17.1832	15.3558	18.9722	17.9585
TFRC	not-sig	not-sig	#N/A	#N/A	#N/A	#N/A	NA	15.6144	16.232	16.9948	16.9101	17.5039	17.3544	17.2731	17.6684	17.2923	16.4117	16.1433	16.4049	16.9092	16.6088	17.3385	16.6807	17.6037	16.183	15.4365	15.3737	17.3728	16.4275	16.8747	16.9444	17.3891	17.7744	17.3351	16.5454	15.975	15.4832	17.1755	15.6365	16.6707	17.3995	16.489	16.8437	16.7055	15.4865	17.7616	16.6371	16.7991	16.5834
DAGLB	not-sig	not-sig	#N/A	#N/A	#N/A	#N/A	NA	14.2257	13.6499	13.3759	14.021	14.2615	14.0367	14.0939	14.1249	14.0838	12.4402	13.09	14.0924	12.0912	13.6972	13.8101	13.7963	13.9363	12.7631	14.0087	13.9329	13.8382	14.2363	14.1244	13.6955	12.5884	13.5423	11.5213	13.7729	13.7824	14.4096	14.0195	13.7809	12.9003	14.0287	12.7062	13.8258	14.1475	14.2619	13.3773	14.2905	14.4824	14.6227
HSPB1	not-sig	not-sig	#N/A	#N/A	#N/A	#N/A	YES	18.5557	16.2467	16.8017	17.5419	18.4424	16.1881	18.1979	17.6529	16.7989	16.0452	16.5632	16.3922	17.2859	17.1952	17.1026	17.0658	15.75	17.1044	16.6163	16.5093	16.3447	17.0212	16.3637	16.6061	15.9469	15.9581	16.1938	16.6205	16.2062	17.106	15.8454	17.032	16.5658	16.6979	15.3304	16.6244	17.4122	16.0792	16.9112	16.4574	16.9654	16.6834
PSMG2	not-sig	not-sig	#N/A	#N/A	#N/A	#N/A	NA	13.4372	13.767	13.4213	12.7261	14.2672	13.3272	13.2162	14.2687	13.507	13.0996	13.612	13.8557	12.4992	13.3618	13.1223	13.136	13.1897	12.7563	13.8321	13.3466	13.4486	13.5207	13.2222	12.8295	13.0941	13.6501	11.5555	14.1929	14.0278	14.371	13.3289	12.1725	13.0539	13.7468	13.6828	13.7247	12.3309	12.1761	13.9078	13.5023	13.5891	14.4905
IARS1	not-sig	not-sig	#N/A	#N/A	#N/A	#N/A	NA	15.1218	15.2275	14.5703	15.1536	15.1614	15.0191	16.246	15.1659	15.1038	15.2653	15.3913	15.4052	15.3415	15.0704	15.4528	15.302	15.403	15.95	15.3855	15.0362	14.9928	15.2168	15.27	15.5371	14.8337	15.4857	15.3625	14.5041	15.4143	15.1323	15.1664	14.78	15.5515	15.5141	15.5142	15.4761	15.0999	15.0395	14.8031	14.3354	14.5766	14.5507
FMOD	1	EMT	0.38383	0.0665578	1.70838	0.0727383	NA	15.5359	12.4223	14.3127	14.7599	15.7405	12.7072	12.7019	15.1382	13.094	12.8139	14.3525	13.8733	13.176	13.9101	14.1259	13.5254	14.0334	15.1039	15.3136	14.122	13.7806	16.8994	14.1575	13.0422	13.8662	12.6131	12.1968	14.2946	14.6782	14.7746	14.6202	14.5522	13.8403	14.0978	12.9631	15.7763	15.3766	13.7757	13.6883	13.5914	15.2834	15.87
TARDBP	not-sig	not-sig	#N/A	#N/A	#N/A	#N/A	NA	15.3175	15.1913	15.6845	15.4646	15.7715	15.5211	12.5738	15.3336	15.63	15.6929	15.5114	15.6424	15.3969	15.3649	15.6884	15.4342	15.7504	15.6234	15.5561	15.7708	15.7269	15.2896	15.682	15.59	15.6485	15.8615	15.483	15.5879	15.6894	15.6181	15.751	15.3673	15.1971	15.3704	15.5185	15.7458	15.5663	15.5857	15.5492	15.6517	15.5289	15.3855
PPIA	not-sig	not-sig	#N/A	#N/A	#N/A	#N/A	NA	18.5946	17.904	17.8435	17.999	17.6895	18.2363	18.8897	17.4438	17.5882	18.129	17.8009	17.4851	18.1179	17.6551	18.0515	17.9532	18.1403	16.6588	17.9654	18.0154	18.085	17.9564	18.2065	17.6705	17.8092	17.8529	18.6492	18.0835	17.8679	17.725	17.9402	17.9836	19.6249	17.8724	17.6402	17.3632	17.6179	17.8569	18.0448	18.4985	18.4362	17.1267
FNTB	not-sig	not-sig	#N/A	#N/A	#N/A	#N/A	NA	13.1864	13.7588	12.7777	13.4926	13.8319	13.6546	13.6621	12.8651	13.5128	12.561	13.1224	12.3854	13.5885	12.9877	13.4561	13.0318	13.5872	11.3911	13.2877	12.7373	13.7238	12.3709	12.9248	13.4088	13.0553	13.253	10.93	13.1187	12.742	13.109	12.734	13.0638	13.4148	12.8778	13.3455	12.777	12.9161	13.1228	12.6278	12.7479	11.9586	12.7894
UBE2J1	not-sig	not-sig	#N/A	#N/A	#N/A	#N/A	NA	11.3043	13.6594	13.5196	13.122	12.3062	13.1028	13.4473	12.8463	12.6762	13.0489	12.5469	13.3211	13.4213	14.4218	12.827	14.1465	12.8875	12.4544	13.4991	13.8214	12.9286	12.6476	13.4159	13.4045	13.5348	13.7465	12.591	14.3414	13.4633	13.0243	12.7446	14.2738	12.8568	13.976	13.3783	13.4776	13.535	11.6836	13.6238	13.3872	13.4136	13.7293
CYCS	not-sig	not-sig	#N/A	#N/A	#N/A	#N/A	NA	16.2161	16.3971	16.5549	16.3344	17.0097	16.8849	15.5853	16.4306	15.8751	16.3365	16.1774	16.012	15.5735	16.2407	16.5222	16.4632	16.5299	13.9712	16.6534	16.4492	16.0659	15.5045	16.7865	15.6318	15.8927	15.5007	15.6682	15.8815	16.6993	16.1157	16.1889	16.4893	16.4228	16.0153	16.5808	15.5866	16.2849	15.5692	16.2761	15.8086	15.2518	15.5537
HM13	not-sig	not-sig	#N/A	#N/A	#N/A	#N/A	NA	17.444	17.2919	16.9495	17.1721	17.2948	17.3592	14.7863	17.2054	17.3065	17.584	17.1191	17.358	18.048	17.282	16.8111	16.6011	16.6966	17.0086	17.3906	16.5697	17.0893	17.577	16.6076	17.1885	17.3477	16.8641	16.9493	16.6231	16.4337	16.8805	17.2414	16.4404	17.9762	16.9834	17.0459	17.0836	17.658	17.0668	16.4648	17.5944	17.4881	16.8204
AP2A1	3	CANONICAL	#N/A	#N/A	#N/A	#N/A	NA	17.2548	17.0302	16.8235	17.4948	16.545	17.5829	16.3382	17.4025	16.7502	17.1589	17.0566	16.7113	18.0121	17.267	16.8057	17.085	17.0579	17.07	17.0582	16.6122	17.1693	16.7483	17.0028	16.4355	16.5755	17.2742	16.5535	17.2147	16.9956	16.5005	16.3916	17.2769	16.9412	17.2149	17.0239	16.6321	16.2675	16.4493	17.161	17.0573	16.4232	17.2673
ACTN1	1	EMT	0.264612	0.093359	2.01438	0.0732795	NA	16.2278	16.1766	16.1751	16.0742	16.0452	16.2767	16.595	16.5576	16.3748	16.3387	16.3585	16.1443	17.4964	16.0428	15.7083	15.8214	16.1845	18.5588	16.2937	15.9245	16.1707	17.3655	15.5929	16.5127	16.4476	16.1868	15.9848	16.26	16.2918	16.4969	15.943	16.8912	15.9658	16.3421	15.9514	17.3125	16.7072	16.8517	16.5123	16.2619	16.9087	17.0862
EIF5A	2	METAB	#N/A	#N/A	#N/A	#N/A	NA	15.131	16.9269	16.2613	15.7387	16.2873	16.381	16.5381	16.2715	15.9356	16.5299	16.3714	16.3064	16.5327	16.1635	16.6646	15.9311	16.1011	16.4557	16.0232	16.3515	16.5793	16.0856	16.3939	16.4871	16.5154	15.8848	16.7705	16.683	16.9519	15.9253	16.0099	15.8537	16.1636	16.1805	16.4794	16.8054	16.4455	17.1269	16.5885	16.4561	16.4307	16.1078
PTGES3	not-sig	not-sig	#N/A	#N/A	#N/A	#N/A	NA	17.4908	16.8578	17.7962	17.2027	16.7287	17.2915	16.0695	17.0168	17.5953	16.5902	16.602	16.7922	16.3442	16.9512	17.4384	17.3173	17.4357	16.7919	17.1512	16.7168	17.4896	16.3284	17.3875	16.6315	16.4652	17.4374	16.3002	17.4356	17.2334	16.7395	17.3621	16.8685	17.7003	17.4623	17.7426	17.0192	16.5069	17.0523	17.5377	17.4121	16.2291	16.1327
TFCP2	not-sig	not-sig	#N/A	#N/A	#N/A	#N/A	NA	14.2255	14.0112	14.0569	13.8528	11.3579	13.8015	13.826	13.5271	13.945	13.7635	13.9404	14.0378	14.5181	13.842	13.606	14.0826	14.0645	14.1359	14.2012	13.9561	13.9491	13.9547	13.3829	14.0612	14.2345	14.2773	14.0505	13.5601	13.7487	13.7606	13.8132	13.3865	14.0506	13.339	13.3774	13.6258	13.6152	14.3939	13.9587	14.4293	13.3547	14.1886
PSMB8	not-sig	not-sig	#N/A	#N/A	#N/A	#N/A	NA	15.2605	14.6469	14.7824	14.6457	14.4462	14.7485	12.0667	14.5433	14.6458	14.711	14.6839	15.1868	14.0187	14.7816	14.939	14.8807	14.6869	14.5433	14.82	14.8123	14.9067	14.8443	15.0094	14.9317	14.7463	14.7301	14.7972	15.3524	15.0739	14.9223	14.8791	15.2708	14.3643	15.2141	15.1268	14.8565	14.8855	15.0504	14.799	14.6836	14.7389	14.9111
UQCRC1	not-sig	not-sig	#N/A	#N/A	#N/A	#N/A	NA	14.6893	14.5003	15.6174	15.3245	15.6934	15.6361	16.8514	14.8711	15.3662	15.7872	14.2641	15.2753	14.6853	15.6271	14.8335	15.9679	15.0668	15.7857	14.5836	15.0462	14.853	13.9893	15.3105	14.9179	15.207	14.4898	14.08	14.9558	15.0238	15.6773	15.2361	15.2744	15.7535	14.552	15.3364	13.9047	15.1074	14.2188	14.4901	15.168	14.8989	14.6424
UBASH3B	not-sig	not-sig	#N/A	#N/A	#N/A	#N/A	NA	14.1119	13.9971	14.202	13.6147	13.9991	14.0544	12.9928	13.8341	12.1171	13.8315	13.7268	13.0219	12.4035	14.2164	13.5267	14.0012	13.8945	13.3009	14.0564	13.9533	14.9026	14.1608	14.1854	14.431	13.5207	14.7291	14.7495	13.951	14.2499	12.5435	14.5683	13.5311	13.6601	14.4532	14.259	13.6026	13.6207	11.8884	14.1892	15.108	13.6042	13.581
SNRPGP15	not-sig	not-sig	#N/A	#N/A	#N/A	#N/A	NA	14.3517	14.3879	14.4106	14.1669	12.5177	14.4096	15.8518	14.2085	14.0334	14.9338	14.4573	14.1747	15.0814	14.4288	14.2709	14.5531	14.4814	14.7285	14.671	14.8038	15.0071	10.9394	14.4501	14.0832	15.1188	15.0001	14.7131	14.4105	14.7542	14.1338	14.167	15.0145	15.7665	14.8956	14.6525	14.6365	13.8795	15.7749	14.1988	15.0412	11.6199	14.1963
PELP1	not-sig	not-sig	#N/A	#N/A	#N/A	#N/A	NA	12.2978	14.391	14.7196	14.3152	14.0626	14.7398	14.307	13.9439	14.3004	14.4257	13.767	13.9801	14.2949	13.9576	13.7016	13.8586	13.3511	14.1301	13.6329	13.9533	14.5787	13.8474	13.2445	13.6839	14.2281	13.9716	13.5134	14.1343	14.1113	14.5215	13.6804	13.3321	12.2718	13.0795	14.0447	13.7708	14.1976	13.9147	13.6224	14.3298	13.8625	14.3564
NONO	1	EMT	0.52861	0.0570766	1.554	0.0743845	NA	20.0903	15.6878	17.7391	18.6645	20.6075	18.6533	17.6685	18.7138	18.3952	17.7285	16.5188	18.2813	16.21	16.4088	18.1676	17.6105	18.2573	17.4193	19.37	17.5722	18.8208	20.1108	18.0357	18.1684	16.6448	18.1264	17.9274	19.5162	19.1462	18.7361	19.5096	20.8828	17.3922	18.8194	17.4591	17.3716	15.9829	17.7487	17.7014	18.183	17.9718	18.3169
LMF2	not-sig	not-sig	#N/A	#N/A	#N/A	#N/A	NA	13.3861	11.9219	12.7306	12.1073	13.036	12.392	13.3414	13.3137	13.6644	14.1997	12.2935	12.5776	12.3834	14.9215	14.9667	12.1152	12.978	12.69	12.3768	12.952	14.1958	12.9904	12.9577	13.0322	12.6726	12.4685	12.2867	12.8627	14.0022	12.2101	14.1537	13.6087	13.264	12.3653	13.6962	11.9693	14.4445	12.8966	12.0467	12.6248	14.2914	11.9756
ATF7IP	not-sig	not-sig	#N/A	#N/A	#N/A	#N/A	NA	12.5029	12.588	13.6218	10.4418	14.038	13.0933	13.4301	11.4369	13.39	12.2203	12.9486	13.1699	12.7607	12.4387	11.9871	12.4132	13.2562	10.9893	13.1533	12.3496	12.5767	11.1252	12.9525	12.2382	12.5562	12.4842	12.052	13.1014	12.7975	12.8158	11.9575	12.1436	12.8519	12.6859	13.1664	12.623	12.5256	12.3989	12.3287	12.5788	12.802	11.5351
ACAD9	not-sig	not-sig	#N/A	#N/A	#N/A	#N/A	NA	14.3831	14.0557	15.027	14.7299	14.7309	15.748	17.2689	15.1598	15.0864	14.9766	14.2178	14.9433	15.3094	14.7918	14.9786	15.4094	14.9207	15.3259	14.8438	14.2195	15.2757	15.4164	14.8555	14.9622	15.0274	15.0519	14.7969	15.1672	14.836	15.5053	14.9739	15.2138	16.0905	15.1161	15.0826	14.8838	15.3961	14.5729	15.3528	14.6269	15.4212	14.3711
ABCD3	not-sig	not-sig	#N/A	#N/A	#N/A	#N/A	NA	14.1892	14.6475	14.5007	13.9042	15.3389	14.2357	12.6651	14.6017	14.2746	15.3471	14.5212	14.5953	14.1846	14.2639	14.7021	14.4802	14.4099	15.3447	14.3384	14.3532	13.9639	14.6701	14.9031	14.6786	13.9711	14.4714	14.4347	14.3154	14.6852	14.5765	14.3067	14.4805	13.3124	14.0648	14.1777	14.138	14.358	14.5503	14.4191	13.9511	14.0455	13.6519
PIP4K2A	not-sig	not-sig	#N/A	#N/A	#N/A	#N/A	NA	12.9028	12.947	12.75	13.7479	13.4277	12.818	14.6191	13.762	13.7105	14.1698	13.2291	13.4721	13.893	13.3462	13.2361	13.1523	12.7029	14.8389	14.0914	13.0679	13.0065	13.5267	13.1048	13.3506	13.3386	12.5683	13.269	14.0067	13.0161	13.364	13.1463	13.7715	14.3488	13.5362	13.2021	12.7151	13.6039	13.4592	13.7868	13.0186	14.6447	14.2741
NEGR1	not-sig	not-sig	#N/A	#N/A	#N/A	#N/A	NA	15.9637	13.5949	16.7318	17.6339	17.4339	17.4394	12.3792	17.0977	15.7858	13.4716	16.289	14.5763	16.6599	14.1113	16.7419	16.6299	17.4107	16.0493	17.3582	16.1448	15.3745	18.3812	16.0428	16.6949	12.6624	16.0952	16.4854	16.5455	15.0435	17.4411	16.0281	15.6889	10.9055	11.8113	12.6625	14.1319	14.9834	16.4367	15.5924	16.4565	16.4788	17.3164
DCTN1	not-sig	not-sig	#N/A	#N/A	#N/A	#N/A	NA	15.3325	15.0766	15.0731	15.0678	15.2044	15.2363	12.7493	14.96	15.2536	15.5142	15.0569	15.1102	15.4272	15.1173	15.2091	15.3029	15.0899	15.6471	15.2066	15.2788	15.0187	15.1475	15.314	15.2396	15.3595	15.3784	15.4911	15.1606	15.2764	15.1337	15.1438	15.1762	14.3059	14.7539	15.1063	15.2333	14.9477	15.4049	15.0464	15.1297	15.2418	14.9449
STX10	not-sig	not-sig	#N/A	#N/A	#N/A	#N/A	NA	13.1738	13.0709	13.017	12.6757	13.1984	13.2854	13.1092	13.0373	12.3987	12.9485	13.4307	12.7332	13.224	13.5142	12.9174	12.9542	12.3594	13.1729	12.7565	13.6318	12.1305	13.3	13.2843	13.6113	13.3677	13.4122	12.5172	13.1293	13.1851	11.7667	12.214	12.9644	12.9201	12.6259	13.6449	12.8596	8.16748	12.3116	13.4736	12.4826	12.7069	12.4783
ACTN2	1	EMT	0.298333	0.0780395	1.80216	0.0755982	NA	15.0642	15.3397	14.7504	14.7339	15.2192	14.7088	16.866	15.1623	14.7347	15.4162	15.6862	15.1286	15.7933	14.6372	14.5022	14.3735	14.7757	16.8432	14.8516	14.5418	14.9429	16.0058	15.0305	15.0085	15.2352	14.7575	14.5939	15.0711	14.9658	15.1213	14.8546	15.2565	15.6872	15.0331	14.8295	16.4473	15.6586	15.3861	14.9561	15.1115	16.373	15.8209
IKBKB	not-sig	not-sig	#N/A	#N/A	#N/A	#N/A	NA	13.2044	12.5365	13.6742	14.4935	10.2922	13.5679	14.5037	12.4204	13.0382	13.0158	13.2337	13.168	13.1767	13.3376	12.3848	13.6956	11.813	12.4017	13.4953	13.5695	12.5722	12.5366	11.9133	13.4614	13.8579	12.8724	14.0886	12.9001	12.0925	13.3328	12.7165	12.8661	13.092	14.6362	13.7756	12.4892	15.7408	16.643	13.9909	10.3285	11.5139	11.275
ARG1	not-sig	not-sig	#N/A	#N/A	#N/A	#N/A	NA	13.1678	12.3841	12.7616	12.707	14.3842	12.1415	16.1844	13.1963	13.4562	11.7118	12.7158	13.4645	9.95714	12.2602	13.4531	12.3817	13.2994	10.7441	12.6443	11.3622	13.4702	13.6897	13.5752	13.398	12.6499	13.2196	13.8493	13.1981	13.1157	12.6255	13.2191	12.8504	12.5853	13.0142	11.9507	11.8804	12.4632	13.6558	13.2833	13.7	13.2632	13.417
C1R	not-sig	not-sig	#N/A	#N/A	#N/A	#N/A	NA	12.8442	13.702	12.0054	13.7943	14.5902	13.6808	12.7615	14.3667	14.7351	14.4953	13.8651	15.1664	13.8192	13.525	11.5675	13.2526	13.5886	14.4753	13.4059	14.4469	14.1658	14.1347	14.2161	14.5369	13.4429	14.4003	13.9255	13.5018	13.8142	15.7753	15.16	13.035	14.4162	13.2038	14.7763	13.247	13.9794	13.635	14.1582	13.5396	14.5368	14.2094
SORBS1	1	EMT	0.409424	0.118986	1.51118	0.0762961	NA	14.3359	13.352	14.7578	14.533	13.5048	15.097	12.2588	14.6031	14.1844	14.4618	15.0959	14.1027	16.2575	14.3772	13.8222	14.0671	13.4818	17.1847	15.0585	14.7598	14.5716	14.1503	14.0602	13.7915	15.1556	15.3039	13.8666	12.1177	13.3395	14.1692	14.099	15.0578	14.2001	13.1573	13.1434	14.3598	14.692	13.0158	13.9997	13.7865	16.2682	16.1953
MRPS34	not-sig	not-sig	#N/A	#N/A	#N/A	#N/A	NA	11.3209	12.2885	12.0429	11.0216	10.3502	12.0602	10.4003	10.5987	11.6343	12.3759	12.2997	12.1204	12.7666	12.0471	12.1407	12.7024	11.6959	12.2521	11.899	12.4677	12.3007	11.2256	11.6848	11.8832	12.3985	11.5173	5.80592	12.1419	12.3162	11.7687	12.1752	11.6704	11.3464	11.7809	12.0637	11.614	13.2873	12.06	11.6425	11.76	11.6409	11.36
FBN1	1	EMT	-0.422233	0.10337	0.649337	0.076612	NA	16.8388	15.5292	16.2203	16.8837	15.1391	16.3963	14.2741	17.7755	16.415	15.2204	15.9622	13.336	17.2226	15.9729	14.9067	16.1906	13.9772	17.8356	15.9029	15.2718	16.0961	16.2333	13.9528	14.4139	15.7967	14.0034	15.3897	16.207	16.2723	16.9203	15.4435	17.2946	17.6469	15.9933	15.7601	17.07	16.958	15.6533	16.5787	17.6695	17.8588	17.5815
VPS35L	not-sig	not-sig	#N/A	#N/A	#N/A	#N/A	NA	15.0784	13.9208	14.6336	13.3327	12.5633	13.5131	13.7057	11.9568	12.4796	13.4502	14.6444	13.9225	12.652	13.4092	12.0271	13.307	12.9416	13.0279	13.0963	11.1889	12.7741	13.6086	13.4188	12.7748	13.7766	12.1437	10.5993	13.5571	14.8852	13.713	13.3751	12.7484	12.1451	14.1326	15.8589	12.2793	13.5002	14.1743	14.8035	13.9281	14.709	12.8509
PLPP1	not-sig	not-sig	#N/A	#N/A	#N/A	#N/A	NA	15.5938	14.5797	15.9319	15.8747	17.7745	13.0971	12.2326	18.2381	15.757	13.4332	14.5334	15.5035	15.7884	15.7026	13.3002	15.5449	13.5427	13.0643	16.1785	15.7694	15.719	18.6075	13.1911	17.7981	15.625	17.8491	17.7381	16.4839	13.321	17.6312	15.4427	15.2537	15.9211	17.8075	18.4802	18.1062	17.7759	14.145	17.7665	15.8636	18.7733	18.0353
LARS2	not-sig	not-sig	#N/A	#N/A	#N/A	#N/A	NA	13.1982	13.496	14.7561	14.6677	13.695	14.1857	12.3879	14.5372	15.023	13.4215	14.2467	14.5184	12.8385	14.2268	14.4238	14.9281	14.9035	13.1857	14.7102	14.5325	14.9835	14.5431	14.6414	15.0506	13.9956	15.0209	14.9755	14.6539	14.8935	15.1806	15.1582	14.3577	14.4508	14.9216	13.5416	13.2187	14.3603	14.4971	15.2565	14.8567	15.0801	14.3216
ANK3	not-sig	not-sig	#N/A	#N/A	#N/A	#N/A	NA	13.9227	13.8579	13.7048	14.7174	14.6987	14.2331	14.4073	15.095	13.8694	14.5937	13.9081	14.06	14.0208	13.8742	13.7897	13.9952	13.8966	14.4764	13.9872	14.1384	13.651	11.7319	13.8618	14.2954	12.5283	13.9755	14.3945	13.509	13.5381	13.3156	13.5628	13.8082	13.06	13.723	12.5761	13.4672	12.6478	13.6438	13.5625	14.3498	13.2627	13.4005
PPP1R7	not-sig	not-sig	#N/A	#N/A	#N/A	#N/A	NA	15.1344	14.9572	14.7142	14.742	14.757	14.9503	12.0009	14.8282	14.5976	14.7028	15.087	14.6676	14.9781	14.8012	14.7681	15.0469	14.6043	14.9303	14.7366	15.0928	15.0079	14.3094	14.8686	14.8025	14.9252	14.6686	14.9817	14.8203	14.8716	14.8351	14.8486	15.0034	14.7062	14.8327	14.7215	15.132	15.0151	14.7166	14.7753	14.6914	14.8338	15.0632
MMTAG2	not-sig	not-sig	#N/A	#N/A	#N/A	#N/A	NA	11.5483	12.4962	12.4444	12.9639	13.4401	11.7835	14.3069	13.0563	13.0329	12.4877	13.0049	13.2632	12.8295	14.3492	12.9531	12.5945	10.4199	13.1811	11.7702	13.8424	12.5003	12.3981	13.1614	13.8618	14.272	12.8897	12.0046	12.2718	12.9443	11.9399	10.6005	12.5382	13.3951	12.0016	11.7709	13.2365	13.5124	13.5567	13.2732	12.6964	12.1518	11.9608
FCSK	not-sig	not-sig	#N/A	#N/A	#N/A	#N/A	NA	13.6521	13.0795	13.2532	13.7075	14.4221	12.8017	12.5453	12.8773	13.1969	13.1327	13.1207	13.852	13.7613	12.8348	12.909	13.495	12.9723	13.0401	14.4105	13.4412	12.9728	11.4473	12.9375	12.2431	13.4513	13.4788	10.9902	12.6078	13.1991	12.5165	12.1593	12.9602	12.7255	13.2713	13.7169	12.2616	13.0188	12.1572	11.5068	12.9105	13.5292	13.0363
HNRNPL	not-sig	not-sig	#N/A	#N/A	#N/A	#N/A	NA	14.0376	14.2212	14.388	14.6143	14.5981	15.0243	15.3506	14.6775	14.2996	14.9018	14.5001	14.4025	15.1721	14.7365	13.9689	14.9615	13.9941	15.5728	14.991	14.7471	14.1283	15.3892	15.2526	14.2246	14.5742	14.9896	15.3559	14.8129	14.4754	14.0075	14.8978	14.4255	15.4426	15.0209	14.2034	15.4138	15.5734	15.1538	14.7498	14.4591	14.4639	15.0433
EMC3	not-sig	not-sig	#N/A	#N/A	#N/A	#N/A	NA	11.966	12.6979	12.8864	12.2217	12.8624	12.6558	11.7039	12.5548	11.8357	13.0365	12.2248	12.3707	12.4849	12.0654	12.6093	11.6695	11.5386	12.9635	12.8082	12.8632	11.7817	12.1731	12.9747	12.0948	12.0147	12.7962	11.7001	13.1687	12.4056	12.4991	12.282	12.948	13.6707	13.1018	13.246	12.8414	13.1096	13.2026	12.4709	13.0971	12.5615	12.0323
SQLE	not-sig	not-sig	#N/A	#N/A	#N/A	#N/A	NA	13.7847	12.5457	13.5908	13.2837	14.4651	13.7021	13.6748	13.2562	12.8134	14.166	13.4283	13.8717	15.2113	13.9095	13.3185	13.6509	13.419	15.1567	13.4663	12.1789	13.5142	12.4501	13.7122	13.6803	13.3099	13.0373	12.8675	14.0029	13.3173	12.894	13.3144	13.9122	14.0722	12.4011	11.2716	13.387	14.7924	12.5136	13.9658	13.5862	12.1846	11.3898
SF1	not-sig	not-sig	#N/A	#N/A	#N/A	#N/A	NA	13.7777	14.0398	14.4182	13.9538	14.0188	14.2629	16.0456	12.976	14.2523	14.8197	14.3464	14.2326	14.2381	14.2989	14.5825	14.0814	14.3725	14.4366	14.4604	14.5104	14.3912	13.2935	14.097	14.0824	14.4639	14.4234	13.5985	14.1421	14.1768	13.7167	14.2274	13.7117	14.351	13.5374	13.9475	13.9955	13.7569	13.723	13.7925	13.9779	13.5109	13.3251
POLRMT	not-sig	not-sig	#N/A	#N/A	#N/A	#N/A	NA	12.7454	13.6136	12.9591	13.3815	13.7991	11.7419	11.9955	14.1018	13.3521	12.2974	13.2637	13.0325	12.9988	13.9799	13.1029	12.3167	13.6448	10.7471	13.7389	13.4477	12.4536	14.8831	12.7317	13.8388	13.3561	13.2577	13.2253	13.243	13.2134	12.9929	12.0237	14.1548	12.7796	14.1201	12.9394	12.5538	13.1697	14.4774	13.5968	12.9211	15.8522	13.8954
UGGT1	not-sig	not-sig	#N/A	#N/A	#N/A	#N/A	NA	17.06	16.7136	16.2504	15.7653	16.3131	16.4197	15.9926	15.9293	15.9848	16.0956	17.0604	16.5708	16.8978	15.9874	15.9777	16.3634	16.3103	16.7231	15.9766	16.6198	16.8101	15.975	16.1446	16.7337	16.7197	16.0526	16.3579	16.4818	16.4131	16.5772	16.5074	16.1395	16.3899	16.2995	16.9324	16.6036	16.0885	15.8069	16.1221	17.0302	16.328	16.6345
VPS8	not-sig	not-sig	#N/A	#N/A	#N/A	#N/A	NA	12.1561	12.5025	12.5002	13.6655	11.1403	11.5707	11.8048	12.3717	12.2523	12.6744	13.1285	12.2811	12.5083	12.651	12.3881	12.0697	12.3475	12.9556	12.4342	11.8129	12.6832	12.2955	12.2505	12.7048	11.5544	12.2547	12.3169	11.956	11.8979	12.1975	11.175	12.343	12.6002	12.6755	12.8083	11.8761	11.6104	13.2464	12.002	12.3922	12.4999	13.2483
DARS1	not-sig	not-sig	#N/A	#N/A	#N/A	#N/A	NA	17.315	16.4496	16.6961	16.541	17.1265	16.4142	16.322	16.2161	16.3699	16.5432	16.6368	16.5223	16.5323	16.5238	16.7268	16.5084	17.1864	16.1534	16.8115	16.444	17.0655	16.9233	16.2534	16.3832	16.7333	17.6556	16.6868	16.5959	16.519	16.5066	16.847	16.1335	16.1181	16.4699	17.1724	16.5867	16.8421	16.0699	16.3332	16.0685	16.0413	16.2453
CASP7	not-sig	not-sig	#N/A	#N/A	#N/A	#N/A	NA	13.4671	13.1668	12.9261	13.0836	14.7508	12.0144	15.2567	13.6426	13.6542	13.8021	13.1977	13.276	13.4789	13.8252	12.4804	14.218	13.8281	13.561	12.8122	13.7007	12.4341	13.6347	14.3695	13.6875	13.5119	13.4908	13.3272	13.6675	14.2089	13.9768	11.9651	13.8966	13.5872	13.5527	12.674	13.9334	12.0186	14.2612	13.7792	12.9711	12.5284	12.8017
HDHD2	not-sig	not-sig	#N/A	#N/A	#N/A	#N/A	NA	14.3307	14.5346	14.0772	14.5071	14.3478	13.6334	18.0646	14.2899	12.9192	13.9562	14.6076	12.9702	14.0933	13.8917	13.6679	14.1401	12.6653	12.1941	13.892	14.4183	13.7313	12.5284	13.5084	13.4554	13.7471	13.5148	14.2138	14.0622	14.116	13.2108	13.0366	13.9959	14.5937	14.0661	13.6358	14.133	13.5718	14.1692	13.7324	13.4725	12.1547	14.4201
MAP3K4	not-sig	not-sig	#N/A	#N/A	#N/A	#N/A	NA	12.6774	13.0187	13.2302	12.2341	12.5669	12.7561	13.1812	13.7486	13.1653	13.3448	9.14776	13.2427	12.1249	13.2298	12.4145	13.2935	12.932	14.6077	13.4039	13.0063	13.5094	14.0755	13.1625	12.8565	13.4526	12.872	11.8776	13.9931	13.342	13.9491	13.5518	13.2687	13.0154	12.5893	12.0528	12.4627	12.5542	12.2956	11.8685	11.9581	12.8719	13.253
GRK2	not-sig	not-sig	#N/A	#N/A	#N/A	#N/A	NA	15.0362	14.6121	15.0703	14.0819	14.6143	14.4568	12.6082	15.2219	15.0912	14.6692	14.3943	15.17	14.4221	14.6731	14.9984	14.4556	14.7533	13.1624	14.7845	14.4567	14.3389	14.7464	14.5215	14.5584	14.6343	14.6537	14.8397	14.7103	14.8838	14.6008	14.9414	14.0798	15.022	14.9991	14.924	15.4562	14.5057	14.9689	14.161	14.8901	14.6058	14.4203
USP9X	not-sig	not-sig	#N/A	#N/A	#N/A	#N/A	NA	16.2952	14.6834	14.8403	14.7073	15.4573	14.6233	15.0905	14.9124	15.1979	14.8059	14.0103	15.217	14.1753	14.9287	14.771	14.6294	15.1656	14.5115	14.8633	14.4311	14.9903	14.425	15.8948	15.333	14.5529	15.2632	14.3013	14.8284	14.8527	14.9909	15.2568	14.5528	16.3118	14.9524	15.3821	15.0073	14.8603	14.7115	15.0257	15.7865	15.8011	14.7936
AHCYL1	not-sig	not-sig	#N/A	#N/A	#N/A	#N/A	NA	14.0167	14.8427	14.6734	15.0567	14.5613	14.0804	14.9623	14.371	13.8506	14.6053	14.8729	15.0253	13.2662	15.3791	14.4329	15.3281	14.1071	13.9709	13.8703	15.2111	14.6533	15.4037	15.6341	15.0938	14.1671	13.9165	14.2471	14.7388	15.2103	14.4529	15.2086	15.2115	13.8929	15.2599	14.4686	13.8812	14.2553	14.8969	14.6803	14.86	15.6755	15.7139
SEC24C	not-sig	not-sig	#N/A	#N/A	#N/A	#N/A	NA	15.8022	15.466	15.2353	15.5703	15.3708	15.2833	12.9904	15.4471	15.0561	15.5001	15.6673	15.0935	15.9931	15.4538	15.4193	15.492	15.2407	15.5068	15.3626	15.451	15.1873	15.3599	15.121	15.4385	15.4858	15.6801	15.2727	15.5408	15.343	15.5267	14.9561	15.398	15.3809	15.4988	15.502	15.4581	15.1853	14.9686	15.4768	15.367	15.091	15.3897
MAPK14	not-sig	not-sig	#N/A	#N/A	#N/A	#N/A	NA	15.0666	14.0302	15.1099	14.0939	13.5351	13.6699	12.3025	15.4273	15.0393	14.5007	14.2613	13.9371	14.5355	14.3993	14.6604	14.6864	15.1019	15.9752	14.5277	14.5194	14.6201	13.8915	14.8776	13.5573	13.8459	15.0127	14.908	13.9912	15.3988	13.6496	14.6744	14.5907	16.9846	13.6539	11.8613	13.7763	13.2783	15.7807	14.3219	15.3434	14.3273	13.5296
F11R	not-sig	not-sig	#N/A	#N/A	#N/A	#N/A	NA	15.6872	15.4757	15.3881	15.6064	16.1905	15.3747	12.6716	15.3021	15.3381	15.3847	15.5728	15.2702	15.5735	15.7379	15.5383	16.0041	16.3799	15.6614	15.5041	15.3901	15.1205	15.4436	15.6383	15.6586	15.2575	15.6109	15.4639	15.218	15.6574	15.6502	15.5642	15.3711	15.2274	15.7106	16.0155	15.8155	15.2764	16.0534	15.8887	15.9649	15.8711	15.7039
PSMA6	not-sig	not-sig	#N/A	#N/A	#N/A	#N/A	NA	16.0506	16.239	15.8089	15.6034	15.2702	15.8612	14.8762	15.5818	15.8349	16.0239	15.9658	15.6431	15.6133	15.83	15.8965	15.8685	15.9177	15.841	15.9732	15.8309	15.6076	15.9741	15.6458	15.7604	15.9478	15.7114	15.6543	15.8899	15.7209	15.8048	15.4751	15.6336	15.3308	15.8515	15.9868	15.749	15.6863	15.8208	15.68	15.1657	15.1063	15.4333
KANK2	1	EMT	0.362538	0.098613	1.57469	0.0812713	NA	14.0318	13.1791	14.3864	14.2181	10.5957	13.6163	12.9295	14.0393	14.3038	13.0987	14.3407	14.2314	14.6728	14.2296	13.5035	13.8072	12.8927	16.1916	14.3445	13.9664	13.7158	14.0876	13.6599	13.7572	12.5681	13.8114	13.6778	14.3614	14.015	14.0467	13.7863	15.237	11.7232	13.6635	13.9297	13.518	14.5713	12.1011	14.4207	14.8244	15.6684	15.6577
TSPAN8	not-sig	not-sig	#N/A	#N/A	#N/A	#N/A	NA	15.0207	16.9891	14.2581	16.0717	15.3244	15.1601	17.0632	12.7088	15.1309	14.4784	14.9384	14.6452	15.0898	15.8522	14.4168	14.4917	16.1757	15.9379	13.2699	14.1002	16.1012	12.2731	16.5104	12.9031	14.0993	16.6694	15.8702	14.0942	16.2729	15.7847	14.9942	14.6495	17.4375	14.7033	15.6955	16.0366	15.0156	14.6152	17.091	16.9561	14.8292	17.6265
PNO1	not-sig	not-sig	#N/A	#N/A	#N/A	#N/A	NA	12.5651	12.1456	14.2115	14.2198	12.2421	13.8821	12.383	13.2808	13.7938	13.2911	14.6904	13.9538	14.6863	13.0458	15.357	14.8271	14.4761	14.9806	14.7697	14.9362	14.2401	14.9022	14.0624	13.2191	14.2877	13.0632	14.4609	14.2934	14.7112	13.3282	13.8212	12.6762	17.4773	13.3878	10.55	14.8489	14.1824	15.3042	13.7315	14.9344	12.6285	12.4676
SH3GL1	not-sig	not-sig	#N/A	#N/A	#N/A	#N/A	NA	14.0814	14.0011	13.6917	13.8168	14.4043	13.7362	13.0105	13.7849	14.5155	14.1433	13.8602	14.8838	13.8205	14.0704	14.3677	14.0672	14.2371	12.5912	14.7498	14.2256	13.7579	14.2994	14.447	14.8448	13.9856	14.891	14.0632	13.8538	13.6531	13.8724	14.1244	13.9126	12.825	13.8358	13.9246	14.006	14.2618	14.1197	13.9641	13.7427	14.7099	14.6446
STRN3	1	EMT	0.326497	0.114369	1.69785	0.0820459	NA	15.9312	14.8932	15.3938	15.8346	15.2172	15.2956	11.2761	15.1353	14.6378	16.0203	15.2003	14.9887	16.1455	14.69	14.8437	15.4371	15.2027	12.5668	15.8582	14.4484	16.0069	15.6702	14.4693	14.8355	15.4429	15.1923	12.4309	14.9612	16.0396	15.1029	14.4018	17.8086	16.3853	15.428	15.4935	16.0932	15.2902	14.6543	15.3211	14.3282	16.4189	16.4129
MT-CO2	not-sig	not-sig	#N/A	#N/A	#N/A	#N/A	NA	15.112	15.8283	15.3014	15.5292	15.3724	15.8857	16.9744	15.3337	15.0628	16.3421	14.7821	15.542	16.9958	15.5382	14.8013	16.1044	15.5426	16.0581	15.1157	15.2724	15.5282	15.2127	15.7901	15.0684	16.3038	14.9939	15.0417	15.8682	15.5404	15.6548	15.6395	15.6116	16.6705	15.3597	16.0544	14.4525	15.7953	15.2418	14.5	16.1091	15.7156	15.1759
EPHX1	not-sig	not-sig	#N/A	#N/A	#N/A	#N/A	NA	17.0599	15.5957	14.8617	15.5783	15.0067	14.5869	13.3103	15.8358	15.4536	15.1091	15.5414	15.7037	15.42	15.2195	15.2906	14.9542	15.2274	15.7957	15.0508	14.7036	14.5327	15.1685	15.2488	15.8172	14.2593	14.4677	14.3447	15.5444	15.2346	15.3646	14.8974	15.2687	15.6108	14.9097	16.1464	15.0073	15.8926	15.2683	15.5676	14.7472	15.954	15.9234
SLC9A3R2	not-sig	not-sig	#N/A	#N/A	#N/A	#N/A	NA	13.3853	12.9642	13.1516	14.3782	11.0718	12.4833	14.8556	14.3642	12.6171	13.2572	13.8476	14.182	14.4617	14.2772	13.9275	13.4853	14.4867	12.1182	14.1557	14.017	13.6661	13.8615	14.0865	13.6683	13.8175	14.3606	12.9389	14.3068	13.5509	14.1557	13.5762	13.9472	10.4482	12.3056	12.6704	13.3795	15.0675	13.9671	12.1055	13.7514	14.5088	14.0493
TP53BP1	not-sig	not-sig	#N/A	#N/A	#N/A	#N/A	NA	14.4637	14.014	13.8499	13.7746	12.5368	13.468	13.4826	13.7027	14.171	13.0385	14.8741	14.0912	13.8789	13.6681	13.8257	13.4276	13.6048	15.5111	13.3622	13.5697	14.296	13.4558	13.2777	14.0818	13.6152	13.4142	12.5112	13.4075	13.6017	14.932	14.2689	13.5905	13.2531	13.9861	14.3747	13.5436	15.0124	13.3798	13.5331	13.5873	13.6902	12.9138
DAD1	not-sig	not-sig	#N/A	#N/A	#N/A	#N/A	NA	15.3995	14.9324	15.3054	16.0819	15.1631	15.0196	13.402	15.006	14.3536	14.587	14.9792	14.2157	15.9997	15.6292	14.6994	14.5168	14.9812	14.9817	14.7448	15.7738	15.5229	15.389	14.9756	15.4126	15.4409	14.9117	14.0813	14.4865	15.3985	14.7294	15.2969	15.9229	14.825	16.2738	16.6207	14.5676	15.1854	15.0327	14.7606	15.1301	15.1929	17.0603
CBX1	not-sig	not-sig	#N/A	#N/A	#N/A	#N/A	NA	12.831	12.1313	13.4261	12.5558	13.4762	13.4032	12.8225	11.0128	13.3674	13.9652	13.3065	11.3633	14.1355	13.6687	13.1661	12.6867	11.4386	14.4733	13.1671	13.7025	13.3826	13.2686	11.0776	12.41	14.047	13.9142	11.7692	12.5429	12.4638	11.8694	12.8525	11.054	11.3917	13.3524	13.4067	13.5844	11.9835	11.8964	11.3735	13.2241	12.242	11.2532
ZCCHC8	not-sig	not-sig	#N/A	#N/A	#N/A	#N/A	NA	13.4509	13.8012	14.1693	13.3618	14.2838	13.0091	14.1627	13.079	12.5056	13.6462	14.228	13.078	12.8425	14.2674	13.9675	12.7954	12.7667	14.7678	13.2215	13.3685	13.0734	14.3664	13.1929	13.4416	13.6991	13.2931	11.4638	13.405	13.1714	13.5494	13.2941	12.4669	12.6735	13.7674	12.4083	13.8629	13.9354	11.2957	12.8277	12.5764	13.1887	13.0612
RAB34	not-sig	not-sig	#N/A	#N/A	#N/A	#N/A	NA	15.5338	17.3614	15.0932	15.2645	15.5406	15.0289	13.3532	15.714	14.826	13.746	13.8665	16.0683	13.8039	12.7797	15.3702	15.9869	16.5245	14.9699	16.1296	13.3383	15.9489	14.8458	15.6074	16.2194	14.5665	14.6343	17.8283	13.712	14.1554	13.0426	16.393	16.5336	14.005	14.412	14.4008	16.6491	17.024	16.5995	15.2329	16.2657	15.7346	18.0122
DPM1	not-sig	not-sig	#N/A	#N/A	#N/A	#N/A	NA	15.8743	15.2063	15.3384	15.293	15.1391	14.3692	15.7266	15.2871	15.0151	15.0955	14.8971	14.932	16.2203	15.035	14.9709	15.2523	14.7025	16.0145	15.33	15.5169	14.1293	15.3384	15.0131	15.2632	15.2461	15.5697	15.2478	15.0212	15.1375	14.6791	15.455	15.1319	16.891	14.9613	14.9798	15.3064	15.2233	15.3969	15.4256	15.3957	15.4088	15.148
TMEM184C	not-sig	not-sig	#N/A	#N/A	#N/A	#N/A	NA	13.875	13.5941	13.5887	12.9398	14.3286	13.5975	13.1541	12.7484	12.7048	13.8206	12.3062	12.2705	13.6926	14.4134	13.1785	13.9423	13.1699	12.9732	13.1813	14.1206	13.632	12.4415	14.1818	13.8016	13.0682	12.4448	12.1917	13.7513	13.4151	11.9789	11.91	13.8467	13.352	13.6695	13.2449	12.1476	13.2695	12.8121	13.8837	14.8986	12.393	12.2943
GRHPR	not-sig	not-sig	#N/A	#N/A	#N/A	#N/A	NA	13.3369	13.3192	12.7384	13.3377	13.2642	13.1918	15.3279	13.7539	13.5431	13.1371	12.8889	12.7701	13.2915	13.0667	13.2883	13.3718	13.0601	13.2219	12.7899	12.8518	13.3539	13.0709	13.0575	12.8981	12.5833	12.7911	13.8828	12.7535	12.9425	14.0306	13.0992	12.6246	14.5715	12.8641	13.27	12.6552	13.1666	13.0658	12.9253	12.2319	13.066	12.8257
SIN3A	not-sig	not-sig	#N/A	#N/A	#N/A	#N/A	NA	13.8151	13.6911	13.7475	14.4286	14.3252	13.8634	14.7143	13.709	13.4468	13.6289	13.1207	14.3157	12.9797	14.4798	14.3954	13.8692	14.4899	12.4453	14.4085	13.9311	14.4245	14.037	14.1646	14.4921	14.1765	14.8506	13.9444	14.2123	14.0418	14.3344	14.412	14.4018	13.0722	13.6521	14.0142	14.1499	13.8092	14.2927	14.1175	14.1297	16.1182	15.2394
GPX4	not-sig	not-sig	#N/A	#N/A	#N/A	#N/A	NA	13.9372	13.8051	14.2985	13.9521	14.6294	14.1936	13.588	14.8657	14.715	13.066	14.2376	14.0448	14.6574	14.2137	14.1673	14.65	13.6434	11.6697	14.3926	14.2293	13.4857	14.789	13.341	14.7307	13.7794	14.5764	14.5547	14.2386	14.3022	14.36	13.9113	14.4791	15.2806	13.9018	13.4698	14.2802	15.417	14.9436	14.1843	14.2002	13.9957	13.7525
GPALPP1	not-sig	not-sig	#N/A	#N/A	#N/A	#N/A	NA	15.8735	14.2789	14.6404	12.9778	15.1337	15.7413	11.8494	13.9156	14.3646	15.3527	15.1144	14.4478	14.9074	14.6573	14.1229	16.0748	14.4998	12.7072	14.9332	15.5075	14.8318	14.8297	14.1919	14.051	14.9579	14.4864	14.8021	14.0193	14.4771	14.2486	14.9782	14.8223	16.9846	14.1517	14.0972	14.8597	15.4642	12.4914	13.9791	14.5527	13.9522	15.3532
ACOT1	not-sig	not-sig	#N/A	#N/A	#N/A	#N/A	NA	13.8111	14.3156	14.7002	14.7011	12.4176	12.9934	15.6646	15.769	14.1641	14.5808	14.1145	14.1247	14.8971	14.0148	13.6645	14.0259	13.519	13.6128	14.0338	14.2462	13.5572	13.9809	13.8754	13.7246	13.8274	13.9495	13.4604	14.1549	13.8341	14.5624	13.6213	14.1246	15.0965	13.6143	15.1156	13.2939	13.562	13.7923	13.9513	14.8063	13.1473	14.0105
NOP56	not-sig	not-sig	#N/A	#N/A	#N/A	#N/A	NA	15.2399	14.9821	14.9505	15.0798	14.6814	15.6434	16.0377	14.928	15.4103	15.4542	15.391	15.367	14.7275	15.2874	15.2681	15.2754	14.8719	15.1277	15.3717	14.5497	15.7916	15.0862	14.8481	15.2408	15.1604	14.7947	14.8145	14.9736	14.9942	15.4581	15.6604	14.8518	16.3362	14.7334	16.173	14.9827	15.1416	14.3604	15.0124	14.7374	14.9021	14.9259
RBKS	not-sig	not-sig	#N/A	#N/A	#N/A	#N/A	NA	13.2212	12.6536	12.977	13.6176	13.4295	13.1973	11.5319	12.5779	12.0278	12.1137	12.0137	11.7266	12.0483	12.7052	12.9832	12.5212	12.9547	11.5061	12.3585	12.5105	12.6473	10.7237	12.4125	12.1595	11.3066	12.843	9.9323	11.4886	12.609	12.7846	12.7758	12.0823	12.9657	10.9087	12.5134	11.2094	11.5866	11.9437	11.4299	11.3082	11.8647	12.892
MED12	not-sig	not-sig	#N/A	#N/A	#N/A	#N/A	NA	13.1687	12.8085	14.0214	13.2262	12.9186	14.8579	14.082	14.7373	14.5302	13.4175	14.4668	14.0405	14.9148	13.2336	13.9266	14.8717	15.3648	13.9967	14.2231	13.8645	14.8382	13.5534	13.5229	14.5843	14.6931	14.1435	13.4381	14.7472	14.8306	15.5992	12.2062	15.0558	14.126	13.9329	13.7102	7.78167	13.2152	12.6308	13.158	14.7024	13.5787	12.6707
SYMPK	not-sig	not-sig	#N/A	#N/A	#N/A	#N/A	NA	12.4635	13.0772	12.6268	12.7495	13.2405	12.891	14.9935	12.6964	12.5419	12.8166	12.7482	12.1693	13.1277	12.5943	11.9987	12.4418	12.8773	14.0448	12.7227	12.1626	12.7146	12.3804	12.5308	12.5206	12.7786	12.8717	13.1377	12.78	12.6823	12.6432	11.9988	12.1685	13.2346	12.8188	13.0183	12.5091	12.3884	12.6894	12.5196	12.4952	12.6138	12.8047
ACADSB	not-sig	not-sig	#N/A	#N/A	#N/A	#N/A	NA	13.5651	13.7456	14.3486	15.9605	16.1939	15.0817	16.0293	16.7782	16.0878	14.8468	15.244	14.6227	13.4969	15.1194	15.0882	14.7375	15.2909	14.915	14.6416	13.9932	14.2399	14.6575	15.5857	15.4836	13.6587	15.6307	14.6611	14.8347	14.802	17.0676	14.9903	13.114	14.2162	13.9142	16.3236	13.7007	13.5386	14.8447	14.114	15.278	14.7292	15.2424
RDH11	not-sig	not-sig	#N/A	#N/A	#N/A	#N/A	NA	14.7511	15.3223	14.64	15.046	14.7256	15.1983	16.477	15.4741	14.8353	15.3905	15.0888	15.0729	15.1359	14.7941	15.3153	14.2065	14.8349	14.6497	14.2768	14.2789	14.4406	14.9036	15.1691	15.2878	14.6464	15.023	14.6868	15.2784	14.8259	15.5069	15.1234	15.2075	14.5806	14.5527	15.771	15.0935	13.8353	15.2982	15.6226	15.161	15.0643	15.2925
SLC16A1	not-sig	not-sig	#N/A	#N/A	#N/A	#N/A	NA	12.2684	12.0059	11.4031	12.0236	12.2345	12.4566	12.9911	12.5865	12.3292	12.4805	12.7328	12.0143	11.3502	10.7132	12.3685	11.3922	12.5035	12.2618	11.6499	11.5088	11.82	12.9203	12.1295	11.9194	11.2254	7.74291	8.91301	11.7204	11.4296	12.3407	12.6065	12.5864	12.4041	12.5443	11.9873	12.3342	12.2252	11.8977	7.32281	7.97475	11.6408	12.9836
MANF	not-sig	not-sig	#N/A	#N/A	#N/A	#N/A	NA	14.3723	14.3939	14.8195	14.5171	14.796	13.3015	15.9173	14.9731	13.9294	14.1853	14.3364	13.389	14.2301	15.1039	14.4623	14.4537	14.0203	11.2522	14.1525	14.5145	15.1602	14.3882	14.8068	15.1149	15.2703	13.7777	14.5233	15.2668	15.3078	15.2818	15.2928	15.1758	15.1851	15.3377	14.9109	14.9261	14.8564	15.4936	15.3691	15.2252	15.6571	15.8228
FKBP8	not-sig	not-sig	#N/A	#N/A	#N/A	#N/A	YES	13.5551	13.642	13.0207	13.5117	13.2205	13.1738	16.6775	13.9311	13.1781	13.6299	13.5782	13.1654	14.1198	13.3625	13.0652	13.5033	13.1622	14.6781	13.8075	13.5543	13.3809	13.8119	13.1696	13.2346	13.6446	13.0999	14.323	13.245	13.5765	12.9793	13.1464	13.4965	14.4096	13.5066	12.9513	13.6238	13.0712	14.0449	13.5709	13.2955	13.209	13.6236
CUL1	not-sig	not-sig	#N/A	#N/A	#N/A	#N/A	NA	13.8669	14.2931	14.0243	14.0615	14.5117	14.2625	17.6518	13.4204	14.144	14.1471	14.1874	14.1838	14.91	14.0199	14.5747	14.007	13.8378	14.8156	14.207	14.1741	13.987	13.3868	13.8663	13.9813	14.1564	14.0643	14.669	14.5692	13.9809	13.5408	14.1304	13.3909	14.4122	14.4285	13.9094	13.6916	14.0584	14.6707	13.9755	13.9198	13.7812	13.1846
LBR	not-sig	not-sig	#N/A	#N/A	#N/A	#N/A	NA	16.1025	15.5487	16.0947	15.7824	16.3867	16.2774	17.4203	15.4631	15.59	16.9439	15.9233	15.7971	16.5998	15.9118	15.9533	16.5775	16.3091	17.6508	16.5104	16.2531	15.9453	15.1425	15.4622	16.1013	16.5535	16.075	15.5536	16.7799	16.1695	15.4029	16.0086	15.5896	16.2197	16.0866	17.3137	15.3582	15.9012	15.2469	15.7475	16.3509	15.8194	15.9778
LOC102724159	not-sig	not-sig	#N/A	#N/A	#N/A	#N/A	NA	15.0324	14.6576	15.0386	14.657	14.2222	15.6871	17.2346	15.6227	14.9598	14.4426	15.361	14.9691	14.8741	15.3013	15.5241	15.1216	14.6291	15.835	14.643	14.4205	14.7381	14.9076	14.5308	15.0145	15.5752	14.595	12.9789	14.5912	15.1146	14.5263	15.2156	14.1297	14.6256	14.5942	15.2195	15.4425	15.3279	15.3053	14.3465	14.7819	14.3993	15.0678
DCK	not-sig	not-sig	#N/A	#N/A	#N/A	#N/A	NA	12.4391	11.9139	11.5111	11.989	13.5871	11.9931	11.2854	12.1329	12.4588	12.4263	11.7196	11.9629	11.4522	11.4693	12.6473	11.606	12.4117	10.9347	12.425	12.411	11.5299	11.74	11.841	12.6206	12.0571	12.4544	13.9431	12.1915	12.4213	11.4198	12.2051	11.4197	14.6309	11.4067	11.1057	11.9805	13.0572	11.4211	11.857	11.0018	12.0369	11.9418
IVD	not-sig	not-sig	#N/A	#N/A	#N/A	#N/A	NA	14.5398	15.7213	15.1089	15.6157	14.7196	15.28	16.694	15.1013	14.5761	14.4093	15.7252	14.8144	14.2627	15.1475	15.1679	14.4156	14.1294	14.3292	13.854	13.9482	14.5742	14.2778	15.0203	15.3188	14.6074	15.1539	14.2498	14.8526	14.8046	16.3595	15.4549	14.2596	14.6484	14.1394	14.2799	13.5533	14.7677	14.4723	14.8073	14.741	14.3579	14.2126
PYCARD	not-sig	not-sig	#N/A	#N/A	#N/A	#N/A	NA	16.2139	15.3753	15.6723	15.0144	13.5185	14.8766	16.0234	14.6629	14.5605	14.7768	14.7022	15.9481	14.0376	15.5858	14.4825	15.8167	15.9355	14.563	15.0259	15.6751	14.771	14.4322	15.501	14.6736	14.5056	14.5035	15.0708	15.6608	15.5804	15.0254	15.1605	15.1875	15.3062	15.9847	14.8132	15.2179	15.5101	15.2412	15.4535	15.0698	14.9212	15.2221
DPP3	2	METAB	#N/A	#N/A	#N/A	#N/A	NA	14.7979	15.3835	14.725	15.2543	14.3724	15.333	15.0798	14.4809	15.7559	15.8905	15.299	15.373	13.622	15.3548	14.8159	15.1877	15.3415	14.8819	15.7305	15.3917	15.7776	14.1915	15.3944	14.8073	14.7517	16.718	15.3458	15.3279	15.2089	15.4735	15.4828	14.3862	16.2655	14.9515	16.6762	15.1218	14.8612	14.198	15.4929	15.1197	14.4554	14.9327
DPP9	not-sig	not-sig	#N/A	#N/A	#N/A	#N/A	NA	13.7158	13.9948	13.5057	13.8479	13.7455	14.2815	17.2369	12.8683	14.2246	14.7701	13.8277	14.023	13.9924	14.0572	14.1579	14.1914	14.5142	14.5367	14.2703	14.1456	13.9021	13.9893	14.0287	14.3725	13.9488	14.1764	14.1622	14.1311	13.7807	13.9711	13.7537	13.7103	14.4927	14.3157	13.8774	14.2442	14.322	14.0187	14.1056	13.9771	14.269	15.6069
ARHGDIA	not-sig	not-sig	#N/A	#N/A	#N/A	#N/A	NA	16.4416	16.32	16.1364	16.4002	16.1445	16.2068	15.6379	16.2826	16.7452	16.5847	16.6157	16.5538	16.5169	16.3666	16.3991	16.7295	16.1632	17.7476	16.3559	17.1855	16.4994	16.2491	16.5088	16.4447	17.0913	16.3325	16.8773	16.4796	16.4283	15.8293	16.6835	16.7875	16.5403	16.1216	16.016	16.3222	16.7018	16.7452	16.1095	15.9017	16.3943	16.3754
RANGAP1	not-sig	not-sig	#N/A	#N/A	#N/A	#N/A	NA	13.9328	14.2918	14.163	14.0289	13.9443	14.3151	12.2542	14.0552	14.6539	14.6149	14.281	14.4489	13.8127	14.3857	14.8084	13.8543	14.55	14.6922	14.2417	14.2611	14.475	14.4259	14.342	14.3855	14.6369	14.4924	14.4274	14.6173	14.5177	14.2879	14.3194	14.0746	14.8715	14.6471	14.7436	14.5847	14.3361	14.5146	14.219	14.0736	14.1153	13.6185
DAB2	not-sig	not-sig	#N/A	#N/A	#N/A	#N/A	NA	11.836	13.4363	14.3472	14.6029	13.6016	13.2973	11.952	14.7734	13.9499	13.448	13.0713	13.3404	14.2865	14.2491	12.7131	12.8924	13.1971	15.1512	13.2639	13.1223	13.5744	13.2433	13.6206	12.3343	13.5972	13.121	12.3858	13.184	12.4349	9.91109	12.2404	13.5727	12.0681	12.7409	12.1941	11.8592	12.6146	12.745	12.4182	13.5738	12.4121	12.976
RPS12	not-sig	not-sig	#N/A	#N/A	#N/A	#N/A	NA	16.5986	16.0461	16.7755	16.3663	16.0755	16.4171	18.0094	16.2965	17.0527	17.1797	16.9794	17.0888	16.6825	16.6753	16.792	16.9302	17.2079	16.8461	16.8671	16.8257	16.5783	16.5486	16.763	17.1087	17.223	16.6922	16.7471	16.584	16.5449	16.3614	16.7278	15.9494	17.4694	16.2945	16.8515	16.6236	16.7827	16.4085	16.6013	16.8337	16.7646	16.358
SEC24A	not-sig	not-sig	#N/A	#N/A	#N/A	#N/A	NA	14.1194	14.0806	13.6041	13.7336	14.3698	13.2532	16.2941	13.9424	13.7859	14.167	13.7151	14.7021	13.3597	14.0388	14.3403	13.7161	14.3424	14.4469	13.9342	14.084	14.2799	13.5721	14.7241	13.9762	13.8578	13.6036	13.4538	14.2551	14.2843	13.4706	13.9998	14.3122	14.2367	14.4444	14.6798	14.5507	13.6719	14.6897	14.0802	14.4067	14.3724	14.6345
CAB39	not-sig	not-sig	#N/A	#N/A	#N/A	#N/A	NA	14.6675	13.8565	13.0356	13.3828	13.8248	13.5093	16.742	12.7125	13.207	13.6222	13.6552	13.7253	13.9791	13.1552	13.5755	13.6275	13.2593	14.3474	13.0899	13.2945	14.0279	13.8032	12.7778	13.901	13.9175	13.6901	13.8932	12.917	13.2259	14.6412	13.7077	12.6428	13.8165	13.9911	14.2796	14.6106	14.4289	13.8817	13.147	13.192	13.8775	13.1945
TSFM	not-sig	not-sig	#N/A	#N/A	#N/A	#N/A	NA	13.6574	13.9412	14.0123	13.6015	13.8572	13.688	16.3523	13.647	13.993	14.0757	14.0117	13.9445	14.1033	13.926	13.8884	13.7524	13.9473	13.6499	13.8121	13.6657	13.7322	12.471	14.3101	13.6498	13.9048	14.2735	13.1905	14.0944	14.221	14.128	13.9938	13.7492	14.3098	13.9539	14.0014	13.6138	14.2847	13.8174	14.441	14.0556	13.8082	13.7707
AKAP1	3	CANONICAL	#N/A	#N/A	#N/A	#N/A	NA	14.3504	12.8678	14.6483	13.6765	13.7879	15.5434	16.6973	13.2399	14.1978	14.4364	13.3553	14.1873	13.0324	14.825	14.5761	15.1065	14.6965	12.6621	13.2781	14.7191	15.2154	13.3506	13.9064	14.5518	14.8208	15.0773	14.6284	14.044	14.7881	13.0545	15.2282	14.2665	15.9415	14.0927	13.828	14.2423	14.0171	13.7394	13.5794	14.8349	13.826	13.3928
TMEM258	not-sig	not-sig	#N/A	#N/A	#N/A	#N/A	NA	14.1956	13.8516	14.3991	14.365	14.5743	14.5922	14.1659	14.0557	14.9182	14.5278	13.967	14.2484	14.701	14.7232	14.3454	14.6774	14.6388	13.1141	14.8076	14.2759	13.1409	14.0482	13.7292	14.9851	14.5809	14.1132	12.7013	14.3017	14.2689	13.9468	14.3461	14.7887	15.1179	14.0439	14.9332	13.8215	14.2963	14.2048	13.866	14.0615	14.7314	14.7724
CETN2	not-sig	not-sig	#N/A	#N/A	#N/A	#N/A	NA	11.8157	11.4496	11.8563	12.8264	11.7984	11.5488	11.3356	12.2074	13.0015	11.9557	11.559	11.869	12.7768	10.9012	12.0651	10.7358	10.5809	13.0098	12.1397	11.5137	12.1457	12.2656	12.7053	11.5696	11.891	11.4508	13.2725	10.7307	11.5058	9.50773	11.2389	11.3133	11.646	9.82592	9.51494	11.5183	11.3478	13.7601	11.2282	11.7367	8.42982	14.6434
LACTB	2	METAB	#N/A	#N/A	#N/A	#N/A	NA	13.0565	12.9772	12.7875	12.6086	14.1468	13.431	12.622	13.411	12.6072	13.1955	12.9372	12.6946	13.0141	12.7124	12.81	13.0163	12.6435	14.1922	12.8982	12.669	12.4961	13.2466	12.981	13.405	11.9573	12.2915	12.2915	13.3444	13.1619	13.0715	12.7527	13.4926	11.8837	13.1346	13.5337	12.9546	13.4847	13.57	12.5539	13.1218	13.0316	13.3771
GOLM1	not-sig	not-sig	#N/A	#N/A	#N/A	#N/A	NA	14.9138	14.4863	14.8857	14.5857	14.273	15.1206	11.6463	15.1524	14.0027	15.1143	14.5704	15.2012	14.316	15.6179	13.7051	15.7741	15.6424	15.1827	14.2993	15.8116	14.8853	14.0202	15.6723	14.307	14.9689	14.8648	15.5278	14.949	14.9046	14.9717	15.3971	15.9275	14.8631	14.4786	15.0003	12.4258	14.5765	15.8148	14.5846	15.5962	14.5355	15.8047
RAB12	not-sig	not-sig	#N/A	#N/A	#N/A	#N/A	NA	13.1534	12.0784	11.6135	12.8535	13.6072	12.418	11.7391	13.2136	12.1049	13.3599	12.5917	13.3921	12.5507	11.3343	13.4907	12.1159	12.1294	14.2927	12.5213	11.7302	12.3595	13.9558	12.6214	12.7861	10.0287	12.5493	12.8893	12.8503	12.7706	11.8568	12.1648	12.9135	11.898	13.2957	13.1027	11.5468	13.2266	13.499	12.1015	12.0913	12.4543	13.5145
PRPF40A	not-sig	not-sig	#N/A	#N/A	#N/A	#N/A	NA	15.6349	15.9072	16.1551	15.9604	16.9048	16.2921	15.8199	15.0239	15.9251	15.2411	15.9588	15.6378	15.4543	15.6953	16.354	15.4868	16.3642	15.2602	15.9088	15.8515	16.2923	15.9863	16.1325	15.4161	15.545	15.9977	16.0424	16.018	15.9499	16.2087	16.1264	15.5322	16.4375	15.7158	16.163	15.9582	15.2783	15.6447	15.6637	15.96	15.6101	15.6629
ITGA3	not-sig	not-sig	#N/A	#N/A	#N/A	#N/A	NA	14.6183	14.8729	15.0563	14.139	15.4306	14.2112	11.7989	15.5387	13.6786	14.8502	15.2293	14.4404	14.7484	15.4785	14.4963	15.2987	14.9091	14.3247	15.1346	14.815	15.1723	15.6372	15.5359	14.2716	15.0327	13.8679	14.9724	13.4053	14.7348	14.3328	14.8687	14.5417	13.9191	14.5173	14.0259	14.3652	14.0438	13.4481	15.153	14.6089	14.9647	15.1697
NCK1	not-sig	not-sig	#N/A	#N/A	#N/A	#N/A	NA	13.491	13.0762	13.0999	12.8385	12.8794	13.0281	11.912	13.0205	12.7855	14.0507	13.0692	12.7537	11.4954	13.3028	12.7367	13.2388	13.0144	13.7038	13.4785	12.911	12.8324	12.9154	12.1227	12.1374	13.3408	12.9857	13.6386	12.3638	12.2401	12.956	12.8214	12.1622	12.5163	12.3739	13.0769	11.8464	12.9743	10.9609	12.6337	12.4168	12.7473	12.9927
FCGBP	2	METAB	#N/A	#N/A	#N/A	#N/A	NA	13.7146	17.3771	13.1398	16.527	14.1322	15.2716	17.7474	14.3403	13.4582	13.9982	13.8142	16.9865	15.3503	16.2279	13.3634	16.6848	14.0262	14.7137	13.2431	17.0498	13.7603	13.3847	18.6658	15.4923	13.4262	15.9258	16.6814	14.0824	14.7815	15.3003	15.5843	16.8264	14.361	15.9394	13.5725	15.5804	13.3368	15.1982	16.2093	14.3843	15.9148	16.7381
GAK	2	METAB	#N/A	#N/A	#N/A	#N/A	NA	14.4865	14.6956	14.0643	14.2426	14.2134	14.3105	15.6238	14.1123	14.177	14.6217	14.3794	14.4078	13.9614	14.3092	14.1286	14.0524	14.0493	16.4497	14.0252	14.2689	14.1401	13.6884	14.4446	14.1297	13.9844	13.9836	14.4388	14.1964	14.1476	14.2945	14.1488	14.2458	14.6974	14.3844	14.2058	14.4186	14.5208	14.4062	14.5031	14.3223	13.9274	14.2914
CENPB	not-sig	not-sig	#N/A	#N/A	#N/A	#N/A	NA	13.1219	11.3282	12.4691	10.8695	13.0131	12.9243	11.6459	12.8794	11.5215	12.1828	11.4338	12.5801	11.8803	12.6566	12.7194	13.0164	11.7839	10.6872	12.7926	12.3857	12.7847	12.3173	11.8624	11.9693	12.8599	12.8584	10.7474	12.9992	10.7887	13.792	12.7335	12.4487	12.3657	11.5311	13.0156	11.9655	12.1626	12.3058	11.9748	12.7932	11.5852	13.554
MICALL2	not-sig	not-sig	#N/A	#N/A	#N/A	#N/A	NA	12.8248	12.0423	11.4883	14.1592	13.268	11.7231	13.2248	11.9451	10.5389	12.894	11.9567	12.4002	11.3381	11.8225	13.6862	13.43	14.3351	12.4958	11.4083	13.4781	11.367	11.5033	13.9634	13.7818	12.2591	11.115	9.26032	13.992	13.7598	12.0617	10.8853	13.582	12.435	14.2174	14.666	13.2796	13.6713	14.413	13.1203	13.1766	12.1607	14.3743
TUBB3	not-sig	not-sig	#N/A	#N/A	#N/A	#N/A	NA	14.9552	14.4988	14.6127	13.9824	15.532	14.0736	17.1597	14.8705	14.6276	14.5358	14.6079	14.5222	14.3026	14.8145	14.5632	13.8303	14.8251	15.6097	14.3388	14.1336	15.0782	14.4619	14.2789	14.4603	14.6511	14.6543	14.7022	14.5807	14.1449	14.5113	14.8429	14.4399	14.0924	14.6815	14.6686	13.9527	14.2757	14.4242	14.4739	14.2513	14.8038	14.1795
STAT1	not-sig	not-sig	#N/A	#N/A	#N/A	#N/A	NA	16.6012	15.8076	16.2778	17.3848	14.1739	16.3963	16.8188	16.0686	16.709	17.7494	16.7846	17.0817	15.9801	16.5118	17.4376	15.9388	16.2554	17.9828	18.068	15.9717	16.5042	17.1361	16.4236	16.7251	16.3165	16.4829	16.6608	18.2876	17.0366	16.3022	15.8636	17.0915	15.5647	17.4908	17.0107	16.7005	17.3724	17.1387	16.4194	16.4078	16.1917	16.1854
LGALS9	not-sig	not-sig	#N/A	#N/A	#N/A	#N/A	NA	13.6331	15.5418	14.5999	15.8382	13.1293	14.5812	16.9295	13.7964	15.7968	14.8256	15.3308	15.7354	15.0283	15.739	14.493	15.5311	15.1307	14.4923	14.6492	14.8535	14.1516	13.5325	15.871	15.4629	14.3025	14.1563	15.4835	16.1195	15.4009	15.8186	15.1989	14.9634	16.1849	15.6391	16.4801	14.4524	15.2033	14.6046	16.1742	16.0364	15.1659	15.3609
UBE2R2	not-sig	not-sig	#N/A	#N/A	#N/A	#N/A	NA	13.6071	13.2313	13.2742	14.5399	14.1511	13.1892	13.8261	14.3761	13.2994	13.9775	13.1237	13.4655	12.6237	13.3241	13.2137	13.1826	13.0176	11.6572	12.6351	13.0871	12.5804	13.544	13.1763	12.8978	11.3797	12.5748	12.0064	12.3145	12.3761	13.0409	13.1462	12.0816	12.7283	12.4136	13.2061	14.0284	12.2744	13.6118	12.9691	13.1087	13.6659	13.3331
XPO1	not-sig	not-sig	#N/A	#N/A	#N/A	#N/A	NA	15.5034	15.4508	16.0875	15.4376	15.841	15.7959	15.4136	15.3716	15.9862	16.072	15.6428	15.2046	15.0992	15.4065	15.7232	15.718	16.154	15.9729	15.1831	15.1788	16.1401	15.1855	15.5171	15.5638	15.3638	16.5547	15.5702	16.0693	15.8635	15.6557	15.9467	15.2809	15.8325	15.4294	15.9457	15.9744	15.1876	15.8361	15.6245	15.8223	15.3267	15.2671
PRPF4B	not-sig	not-sig	#N/A	#N/A	#N/A	#N/A	NA	15.0028	14.0485	14.4558	14.911	14.235	15.0542	15.1667	15.1421	14.3637	15.067	14.1258	14.2584	14.6229	14.0175	14.659	14.393	14.2327	15.0509	14.2622	14.5641	14.2614	14.7642	14.1901	14.0713	14.5661	14.0772	14.9314	14.4363	13.8683	13.926	14.1403	14.0386	14.5645	13.2454	14.0812	13.8007	13.9827	14.2979	14.4853	14.565	14.6629	14.367
LRCH4	not-sig	not-sig	#N/A	#N/A	#N/A	#N/A	YES	13.3368	12.076	12.5345	11.7233	12.9682	12.6165	14.4264	12.4891	13.2126	12.0597	13.2887	12.9117	12.0344	13.3169	13.4542	12.5238	14.5271	14.2179	12.7157	13.2893	12.3849	13.6671	14.1347	11.3108	12.5976	11.517	12.3949	12.5001	12.7928	12.4349	11.1367	13.2522	13.0535	13.7061	13.0444	12.8882	13.6067	13.5368	13.3968	12.8629	13.4133	13.1243
RCN1	not-sig	not-sig	#N/A	#N/A	#N/A	#N/A	NA	16.2357	16.1531	15.8743	15.246	16.0036	16.2141	15.95	14.796	15.8817	15.2167	15.3015	16.106	14.1753	15.8756	15.8352	15.9139	16.0186	15.7038	16.0444	16.4303	16.4662	15.4923	15.6747	15.7934	15.8124	16.0092	15.8966	15.4124	15.9604	17.1168	17.0336	15.3339	16.5239	15.7297	16.0236	15.7674	15.8321	15.596	16.0032	15.372	15.7293	15.6377
ECT2	not-sig	not-sig	#N/A	#N/A	#N/A	#N/A	NA	10.3928	10.0786	12.7773	10.911	15.2428	12.9853	14.2115	11.8066	13.782	11.5796	10.1199	14.979	11.2148	10.7005	13.5121	10.9277	14.5683	10.8022	11.6015	11.9813	12.0285	15.6374	14.5158	13.6167	12.2739	10.4506	10.4602	12.4392	10.2874	10.1317	15.0226	10.6871	11.3905	11.8545	11.8394	13.5734	12.5203	14.8225	12.4984	11.4012	16.7132	10.0819
RANBP6	not-sig	not-sig	#N/A	#N/A	#N/A	#N/A	NA	10.7941	13.008	11.9895	11.3657	13.6039	12.1339	12.5413	12.7552	12.9526	12.637	13.0075	11.8299	13.1216	12.3761	12.1704	13.465	13.463	15.2468	13.544	12.7045	13.0873	11.8542	13.1577	12.4906	12.7789	12.4348	14.9686	11.2335	12.6474	13.8632	12.2856	11.7324	13.9276	12.64	12.8907	13.703	12.6204	14.1417	12.7128	12.8587	12.5472	12.4732
SYAP1	not-sig	not-sig	#N/A	#N/A	#N/A	#N/A	NA	14.0024	14.9318	14.8051	13.7609	12.6297	15.263	12.7177	14.1577	14.1383	14.9644	14.8126	15.7686	14.2966	14.3051	15.1604	13.8174	14.3355	15.9936	15.2988	14.8187	14.4849	13.1631	14.9963	15.1747	13.779	14.2663	14.9083	14.1626	14.891	15.4392	14.7416	15.6396	12.8932	14.8696	13.8739	14.9357	15.1611	16.6977	14.3615	14.6436	13.0183	14.4083
PSMA2	not-sig	not-sig	#N/A	#N/A	#N/A	#N/A	NA	16.195	16.2448	15.7187	15.445	14.8676	16.0455	15.7789	15.5146	15.6335	16.0618	16.034	16.007	16.1709	15.7218	16.0092	15.4389	15.9513	16.8371	16.2382	15.766	15.8445	15.7998	16.0265	15.469	15.7987	15.681	15.5361	16.046	15.6753	15.9219	15.5114	15.524	15.6824	16.1637	15.7296	16.1024	15.8362	15.8517	15.4723	15.3937	15.3699	15.718
PHF6	not-sig	not-sig	#N/A	#N/A	#N/A	#N/A	NA	15.4621	15.8711	14.8494	15.3276	15.3758	15.6152	11.624	16.6589	15.2795	12.7628	12.5931	14.8496	15.3721	15.3146	15.4812	15.2554	15.0296	12.5295	13.6795	15.4113	16.1261	16.486	14.8706	14.6774	13.5753	13.9951	15.8349	14.4371	15.2635	14.6689	15.0628	16.1579	15.1359	14.4748	15.1031	15.7636	15.1036	16.8361	14.3171	16.8882	15.9895	16.4673
FLNA	1	EMT	0.243853	0.155347	1.86814	0.0904845	YES	18.1026	16.6782	17.8396	18.77	18.0625	17.6332	18.5715	18.0695	18.3149	17.6365	18.7292	18.2037	19.815	18.3079	17.5849	17.1832	17.4532	18.7815	18.5192	17.5898	18.159	19.3695	17.3028	17.9925	17.9406	17.7097	17.0761	18.0687	18.0938	18.4028	17.5072	19.2201	18.0413	18.0774	17.6131	18.4818	19.1753	17.6452	18.3832	18.1202	20.1023	19.8222
RPA1	not-sig	not-sig	#N/A	#N/A	#N/A	#N/A	NA	15.1299	16.2896	16.2929	15.4065	16.9362	15.972	16.4602	16.1033	16.1149	16.1871	16.0911	16.0494	16.5542	15.9864	16.5408	15.8077	15.7492	16.0784	15.8657	15.8561	15.885	16.3139	15.9302	16.3797	15.9441	15.8584	15.9762	15.9493	16.2042	15.7456	15.9391	15.9449	15.1949	15.7606	15.941	16.7954	15.6895	16.5493	15.7255	15.6954	15.4269	15.4558
TXNDC9	not-sig	not-sig	#N/A	#N/A	#N/A	#N/A	NA	12.6085	13.4212	12.6873	12.4811	9.8764	12.2093	12.8408	11.6722	12.9862	12.478	13.3797	12.586	12.3545	12.5509	12.192	13.0641	13.4611	11.9377	13.1651	12.5091	12.7055	12.7572	13.2167	12.2371	12.6101	13.7408	14.4004	12.5893	12.4122	13.1698	12.783	12.7519	12.0441	13.6085	12.6506	12.7825	12.2536	11.8535	13.2233	12.8192	11.5542	12.3294
DDX1	2	METAB	#N/A	#N/A	#N/A	#N/A	NA	13.4123	14.2178	14.2368	13.7099	13.7939	14.1439	16.4679	14.3091	14.0019	14.7716	14.2933	13.9586	14.1358	14.1748	13.9787	14.2054	13.9407	14.9003	13.6473	14.1508	14.1612	14.1596	14.1738	13.5478	14.3112	14.2261	14.1731	14.2236	14.3421	14.2014	14.3745	14.3661	14.4215	14.1346	14.2111	13.9235	14.3582	14.3696	13.7298	14.3446	14.191	14.1164
C2CD5	not-sig	not-sig	#N/A	#N/A	#N/A	#N/A	NA	13.9164	13.8286	13.4785	13.6824	13.9551	13.9691	13.989	13.5112	13.992	13.7948	14.0459	13.5105	14.0835	13.8557	13.6268	13.9676	13.5352	12.3604	13.8583	13.7139	13.6895	11.3065	13.7745	13.9628	14.3185	13.6175	14.4115	13.405	13.7623	14.0493	13.671	14.27	13.1588	13.7632	13.9593	14.9244	12.5702	12.9613	13.8901	14.1	12.9508	14.1989
SRSF11	not-sig	not-sig	#N/A	#N/A	#N/A	#N/A	NA	15.7118	15.5422	15.8645	14.8231	15.8892	15.1776	12.9323	15.561	14.9287	16.035	15.2338	14.7619	16.4962	14.391	16.2936	15.7313	15.9825	15.3543	15.6673	16.0222	15.2053	14.9451	15.5839	14.8001	15.4866	15.8483	15.0174	15.3326	15.8497	15.3674	15.0254	14.3643	16.5743	15.7564	15.9451	16.3566	15.9733	15.7805	15.8438	16.0071	15.1419	15.1
GLUD1	not-sig	not-sig	#N/A	#N/A	#N/A	#N/A	NA	16.5259	15.6397	16.1051	17.3273	16.617	16.898	16.0917	17.3481	16.6197	16.249	16.7154	15.8107	15.9628	16.9857	16.0006	16.8938	15.7636	15.8753	16.5239	16.4379	16.1407	16.443	16.6561	16.5109	15.7304	17.011	16.1154	16.6847	16.4267	16.8802	16.6819	16.2713	16.2898	16.1024	17.4838	15.3057	15.9881	15.551	15.938	16.7495	16.4802	16.4828
SNX1	not-sig	not-sig	#N/A	#N/A	#N/A	#N/A	NA	14.8166	15.3767	14.6935	14.7492	14.8229	14.4175	14.794	14.8241	14.8658	14.6806	14.8602	14.8909	13.929	13.9824	14.6357	14.787	14.0594	15.2612	14.8935	14.7215	14.7989	15.2742	14.7237	14.7056	14.7809	14.4816	14.7761	15.0069	14.6944	15.0145	14.374	14.9173	15.3886	14.4973	15.0171	14.726	14.0805	14.5658	14.6739	14.0983	14.2347	13.9413
NUDT9	not-sig	not-sig	#N/A	#N/A	#N/A	#N/A	NA	10.7306	12.1178	10.8463	12.0762	12.5458	13.1093	11.2975	10.1268	10.5631	10.148	11.9579	11.7382	9.79354	11.6584	11.8154	11.2033	12.4475	11.4427	11.1898	12.6273	11.0919	9.79506	11.4523	11.5304	11.7354	11.3669	12.9374	11.9068	11.5915	11.9336	12.134	11.4761	10.2972	11.281	11.9621	11.2908	12.1439	10.9905	12.2216	10.055	13.0267	12.7994
TOMM5	not-sig	not-sig	#N/A	#N/A	#N/A	#N/A	NA	12.4635	13.9645	13.8518	13.9914	13.7113	14.6283	16.0888	14.3644	14.2161	12.4527	13.6946	13.4442	10.7726	13.968	13.8749	13.1627	14.0233	11.3325	13.3565	13.6383	13.9061	12.9894	13.8249	13.2461	11.7594	13.5484	13.6527	12.5347	13.0658	13.5047	13.806	12.6532	12.7128	13.6139	13.6852	13.3765	13.0262	13.1742	13.4579	13.4303	12.8105	12.9887
IGKV4-1	not-sig	not-sig	#N/A	#N/A	#N/A	#N/A	NA	13.7172	14.697	14.3985	13.5503	15.3383	13.1479	16.5778	16.9449	14.6034	16.5183	15.6078	15.844	15.1595	15.6806	16.7631	13.0861	14.3187	16.7425	17.1644	15.9871	11.6195	16.5245	11.9078	17.6374	14.6537	13.3205	13.3966	15.3776	13.5825	14.9576	13.195	15.9344	15.8414	18.7157	13.606	15.9627	15.4024	14.6355	15.0701	12.9923	20.8244	20.2348
HEATR1	3	CANONICAL	#N/A	#N/A	#N/A	#N/A	NA	14.6861	14.3626	14.6367	14.8534	14.955	15.4077	12.8954	14.659	15.0268	14.7421	15.1123	14.7124	14.7781	15.1626	15.1036	14.5182	15.3359	15.0455	14.9562	14.6447	15.1579	14.7856	14.6686	15.0612	15.1773	14.5653	14.9551	14.8417	15.0243	14.1295	14.7847	14.1345	14.0396	14.2332	15.2972	15.2676	15.1594	14.9183	14.6198	14.6858	15.0126	15.0363
RTCA	not-sig	not-sig	#N/A	#N/A	#N/A	#N/A	NA	14.3147	16.1949	14.2316	13.9295	14.1561	14.5258	11.5475	17.2019	15.1552	15.3788	14.4847	14.2344	14.6918	14.3385	14.09	15.5283	14.2098	16.345	14.7731	14.1529	14.189	14.9148	15.1804	14.3566	14.4283	14.2113	14.1939	14.5723	14.0497	16.8634	15.1082	13.3218	15.2666	14.8895	14.6119	13.018	14.2648	14.8146	15.023	13.4503	14.3991	14.4539
CTSD	not-sig	not-sig	#N/A	#N/A	#N/A	#N/A	YES	18.2374	17.4039	16.6859	18.0076	16.5219	17.2783	17.054	18.1797	17.0702	17.3964	16.8756	17.272	16.5381	17.5366	16.5206	16.3992	17.3812	17.6534	17.0508	17.1656	16.8066	17.4171	17.4614	16.338	16.3227	16.8564	17.6624	18.3036	16.9387	17.9008	16.5261	17.0934	17.1726	17.6898	17.0975	16.7448	17.2998	17.0455	17.3349	17.2133	16.9828	16.9271
ARF5	not-sig	not-sig	#N/A	#N/A	#N/A	#N/A	NA	14.9204	13.8972	13.817	14.3302	15.041	14.2525	16.9368	13.3045	13.8397	14.1273	13.6821	13.9952	13.6322	14.0707	14.5391	14.0891	13.9251	14.4855	13.4329	14.098	14.4941	13.9536	14.4299	13.519	14.182	14.9674	15.1563	14.5041	14.3317	14.1965	14.3944	14.3617	15.1682	14.4443	13.6364	14.5388	13.9996	14.7971	14.5767	14.3129	13.5748	13.9618
DHRS1	not-sig	not-sig	#N/A	#N/A	#N/A	#N/A	NA	12.1021	12.4401	10.8238	11.2613	12.6032	10.9223	11.4152	12.6465	12.1131	11.2355	12.2322	11.2855	10.6362	12.307	12.1502	13.0331	11.0591	11.764	12.983	11.2328	12.6521	12.0948	12.6581	12.8918	9.19378	11.512	11.3405	13.3787	12.267	10.497	10.5955	13.5461	11.1074	12.1755	9.99966	13.4725	12.5383	12.5471	12.1807	12.1797	12.6854	12.4907
CCDC97	not-sig	not-sig	#N/A	#N/A	#N/A	#N/A	NA	14.7346	12.7569	12.2267	11.5438	13.1974	13.4564	13.63	12.5945	14.8917	13.5496	12.3335	14.9497	13.0974	14.4869	14.7896	14.1854	13.0398	11.4917	12.9506	13.5175	12.9986	12.8183	11.5637	14.7228	13.5436	12.5321	11.0997	14.931	13.3104	15.5039	13.1478	13.3271	12.0862	13.2387	12.9363	13.3275	13.2359	11.4687	12.5028	12.8662	13.4721	14.6691
SLC25A13	2	METAB	#N/A	#N/A	#N/A	#N/A	NA	16.9041	15.5752	16.1557	16.3753	15.3739	16.5481	15.49	15.9057	15.7404	15.6437	15.8001	15.4952	16.0914	16.3715	15.5245	16.1813	15.6828	15.8666	15.4241	16.0408	16.3085	15.0115	15.7224	14.5715	15.5593	15.818	15.7366	15.6795	14.9611	16.2838	16.1934	16.3022	15.3249	15.2114	16.8026	14.6536	15.7795	14.5242	15.7145	16.5098	15.1463	15.3524
MRPL13	not-sig	not-sig	#N/A	#N/A	#N/A	#N/A	NA	13.2089	13.2609	13.1497	13.4994	13.3357	14.2487	12.0141	10.8843	13.3865	14.6286	13.8919	12.8413	11.8576	13.7459	13.557	13.7664	13.9441	11.7476	12.6442	14.2117	13.0006	9.45046	13.2103	13.1201	13.437	13.68	12.1595	12.5868	13.7239	14.3607	12.3077	12.2804	16.5123	11.1673	13.6745	11.1399	12.9746	11.0792	12.1773	12.4031	11.6398	10.514
ATP2A3	4	IMMUNE	#N/A	#N/A	#N/A	#N/A	NA	13.4942	14.3833	14.1846	14.6678	14.8488	14.6064	12.3763	14.5175	14.6346	14.8705	15.1666	14.514	14.7992	15.5448	14.0175	15.7811	14.2799	14.5326	14.2724	15.61	13.7378	14.6066	15.211	14.8045	14.9699	14.3969	14.7841	14.417	14.217	13.6502	14.24	14.5642	15.1781	14.99	14.2936	15.1315	14.5289	14.8574	15.1682	15.9367	15.4784	15.5329
NABP2	not-sig	not-sig	#N/A	#N/A	#N/A	#N/A	NA	11.3995	11.7628	11.8751	12.0094	11.3439	12.6287	11.4062	11.3751	11.3795	12.4745	11.9493	11.4903	13.2657	11.8003	12.3351	12.5091	12.1728	13.0596	12.5533	10.8727	12.992	12.3938	11.4872	12.3025	13.3674	12.1943	10.9778	12.4193	12.4383	11.3245	12.9269	12.6474	12.6526	11.9415	13.1162	11.9	12.0282	13.0363	12.4557	12.1484	11.954	10.7533
ANKHD1	not-sig	not-sig	#N/A	#N/A	#N/A	#N/A	NA	12.947	13.1229	12.7965	12.5569	11.9115	12.4915	14.5671	12.6485	13.6365	13.3038	13.299	14.3147	12.7632	12.9446	12.8971	12.9399	13.5858	13.6595	13.8187	12.9494	12.8421	13.9677	13.1324	13.3988	13.1788	13.1952	14.2915	13.6921	13.1448	12.8679	12.5183	13.3435	13.9364	12.742	13.8356	12.9585	13.4318	13.9497	12.8397	13.1963	14.4864	13.6208
CTBP2	not-sig	not-sig	#N/A	#N/A	#N/A	#N/A	NA	14.3883	13.3166	14.4254	14.3454	14.9845	14.6187	12.4165	14.8627	14.5828	14.5537	14.31	14.4783	14.1628	14.7445	14.9155	14.5642	15.0756	12.5381	14.5731	14.6475	14.8927	14.613	14.747	14.6384	14.6446	14.9533	14.6499	14.5023	15.011	14.7592	14.71	14.286	13.2188	13.9184	14.6465	14.8363	14.8011	14.7629	14.6484	14.7496	15.1979	14.6389
NUP133	not-sig	not-sig	#N/A	#N/A	#N/A	#N/A	NA	13.4134	13.3809	14.2432	14.0478	14.0302	13.8051	12.3271	13.7249	13.7477	14.0703	14.3346	13.4856	14.6606	14.4807	14.3093	13.7713	14.478	14.0033	14.6093	14.5461	14.8181	14.2785	13.6425	13.6835	13.6995	14.7569	14.3337	14.1798	14.2601	12.9426	14.5113	13.4163	15.2284	14.2866	14.4048	14.6307	14.0167	13.3876	13.4699	14.74	14.6453	14.3844
DBN1	not-sig	not-sig	#N/A	#N/A	#N/A	#N/A	NA	13.9275	12.2942	13.7696	13.4184	13.9098	12.5946	12.2309	14.5324	13.0411	13.4651	14.5378	13.1341	15.0179	13.1192	15.3781	12.9545	13.4296	14.8988	14.9181	12.6413	13.6001	14.9791	13.3239	12.635	13.4856	13.0916	15.9193	12.8705	12.7687	13.6921	12.3221	13.315	13.1345	13.8674	14.6304	13.3886	14.3512	15.0109	13.9629	13.6656	14.7024	14.1807
GNPDA1	not-sig	not-sig	#N/A	#N/A	#N/A	#N/A	NA	15.1445	14.2125	14.3583	14.2344	14.0344	15.1074	16.8804	14.9725	14.91	14.8605	14.1965	14.3083	14.9031	14.4594	14.5846	14.8431	13.8928	15.1577	14.6444	14.4642	14.5564	14.9176	13.8749	14.3799	14.6212	13.7153	14.1596	14.8415	13.9311	14.4025	14.6283	14.5156	15.4612	14.5602	14.3878	13.675	14.9271	14.5397	14.0341	14.0153	14.0899	14.0664
NECTIN2	not-sig	not-sig	#N/A	#N/A	#N/A	#N/A	NA	13.0161	13.7118	13.8432	11.9576	14.0419	12.532	14.2934	13.3176	13.2902	12.0833	13.3567	13.8707	12.5768	12.691	13.6868	12.0646	13.7411	13.4676	12.5516	12.5701	13.4026	14.0779	14.5261	13.912	13.0138	13.1994	12.8386	13.1605	13.6996	13.6715	12.6382	13.2272	13.11	13.7784	13.6441	14.0102	14.2826	14.2119	13.8088	13.6605	13.3282	12.0221
NEU1	3	CANONICAL	#N/A	#N/A	#N/A	#N/A	NA	13.8888	13.3759	14.7748	14.6399	10.423	14.2391	13.4822	14.2996	14.3375	12.7294	13.0213	12.7021	13.285	13.3261	12.7052	13.1468	15.3221	10.8219	11.5738	13.9808	13.6838	13.001	12.9203	12.1424	12.6891	15.0225	14.5377	14.0967	11.9061	14.0016	14.5514	12.7906	12.6748	13.9754	11.8467	11.8728	14.414	11.0165	11.224	14.7735	12.1786	13.2492
TAP2	not-sig	not-sig	#N/A	#N/A	#N/A	#N/A	NA	14.3246	14.6254	14.0491	14.9134	12.7708	14.6001	15.6155	14.366	14.4901	16.5657	14.4841	15.2397	14.6929	15.2267	15.4665	15.0689	14.3588	15.2701	16.0161	14.1705	14.4288	15.5685	15.3432	14.1321	14.4753	14.8994	14.9643	16.7178	15.3007	15.2235	14.6431	15.767	14.4296	16.5438	14.9793	14.6791	15.4884	15.5749	15.411	16.1792	15.0534	15.2045
ARFGEF3	not-sig	not-sig	#N/A	#N/A	#N/A	#N/A	NA	12.9376	13.5312	15.619	14.2654	14.9146	12.9271	12.2351	14.2659	12.8778	14.0141	13.7735	13.5873	14.33	13.1112	13.2832	13.6871	13.407	14.3118	14.6387	13.9607	13.5539	15.0302	13.0181	13.7064	14.014	13.0133	13.3798	13.354	13.3637	13.706	13.6916	13.456	14.8421	12.427	13.4649	13.6896	15.0512	13.5338	13.6327	13.344	13.5173	14.1182
RAB27A	4	IMMUNE	#N/A	#N/A	#N/A	#N/A	NA	14.8379	13.7185	13.6797	14.7725	15.6502	14.0947	12.3887	16.1145	14.6051	14.1995	14.4474	15.008	13.3119	15.3175	14.56	14.8329	14.8547	13.6196	14.8733	14.7721	14.3145	15.6796	15.3768	15.2977	14.6503	14.2548	14.3975	14.9698	14.4634	15.0385	14.5954	14.4823	12.7441	15.3773	14.7042	15.0725	14.5661	15.3041	15.03	13.6622	15.7267	16.1315
PDPR	not-sig	not-sig	#N/A	#N/A	#N/A	#N/A	NA	14.1045	12.8084	13.5221	13.099	13.4573	13.3277	17.0496	13.1627	13.2898	14.0756	13.0098	12.7643	13.6576	13.5556	13.6692	13.4845	13.0368	13.7036	13.4556	12.8655	13.6529	12.9587	12.9227	13.573	12.9919	13.6441	12.9	13.4159	13.0759	13.8297	13.599	13.5068	12.2051	13.8201	13.8495	12.7303	13.5198	12.2248	13.3145	13.7326	12.8903	13.6386
EPCAM	not-sig	not-sig	#N/A	#N/A	#N/A	#N/A	NA	14.8814	15.7016	15.8455	15.0741	14.9197	15.7753	16.7023	15.7167	14.704	15.6907	14.8657	14.1869	16.0464	14.9637	14.4135	15.52	14.4059	15.9907	14.6111	15.148	15.3052	14.0211	14.3037	14.3998	15.5894	14.8907	15.3223	14.9603	15.2137	14.2935	14.5826	14.5139	14.7337	15.2124	14.8656	15.0999	15.1628	15.6758	15.2318	16.133	14.58	14.5155
VPS13C	not-sig	not-sig	#N/A	#N/A	#N/A	#N/A	NA	14.3569	14.5421	14.3999	14.3073	13.0546	14.4688	12.8968	14.2264	14.1799	14.7723	14.4252	14.2356	14.6108	14.2797	14.1744	14.2312	13.7152	14.8274	14.2003	14.2405	14.135	14.3817	14.222	14.5375	14.536	14.3718	13.8555	14.312	14.2802	14.1896	14.2973	14.3781	15.1455	14.2789	14.431	14.2098	14.2735	14.1706	14.1938	14.2213	14.7134	14.3562
MLKL	not-sig	not-sig	#N/A	#N/A	#N/A	#N/A	NA	13.4011	12.9265	12.5562	12.1411	9.84151	11.4181	12.4345	10.736	11.9236	12.4067	11.646	12.6867	11.3841	12.2762	12.8199	12.7248	11.5672	13.4121	12.4614	12.6184	12.5589	12.8882	12.1387	12.4502	11.6786	12.1031	12.6176	12.0513	12.6085	9.3438	11.7981	12.4816	13.7357	13.9233	13.0313	13.9506	12.4878	12.878	12.6716	12.3232	13.5635	10.4351
VAMP7	not-sig	not-sig	#N/A	#N/A	#N/A	#N/A	NA	13.7133	13.6092	13.8645	13.8931	13.7735	13.2368	14.3569	14.0084	13.6413	13.5853	12.8291	13.3797	13.2025	13.5788	13.2205	13.1971	13.3825	14.9291	13.4065	12.8877	13.5446	13.8343	13.7838	13.684	13.6034	13.7243	12.0169	13.2625	12.877	13.0096	13.2378	13.3305	13.8154	13.839	13.9587	13.6893	13.7177	12.6759	13.5307	13.5398	13.1896	14.1458
OTC	not-sig	not-sig	#N/A	#N/A	#N/A	#N/A	NA	11.5481	14.044	12.105	12.0647	14.362	12.4122	12.7562	10.3899	13.7767	12.1387	11.8523	13.6472	12.3509	10.7156	13.3197	12.1126	14.0302	13.4152	12.2877	14.2181	13.5507	11.8866	13.9093	12.589	10.7126	13.6369	11.3964	13.929	11.4079	14.6419	13.0899	15.5738	11.744	11.9775	13.2812	13.1216	13.4042	13.5583	13.3613	15.1903	13.8119	11.0417
EIF4G2	not-sig	not-sig	#N/A	#N/A	#N/A	#N/A	NA	14.5249	14.8942	14.9711	14.6007	14.2352	14.6973	15.7602	14.5703	14.3642	14.7276	14.7611	14.5377	15.167	14.4923	14.7331	14.7775	14.6242	14.9836	15.1234	14.517	14.552	14.2076	14.5059	14.4147	14.8193	15.0514	14.4693	14.7099	14.6132	13.8119	14.0827	14.256	14.7122	15.0773	14.5311	14.5769	14.0816	14.303	14.3673	14.5557	13.431	13.8149
C3	4	IMMUNE	#N/A	#N/A	#N/A	#N/A	NA	17.5487	18.1005	18.264	18.236	19.5404	17.1763	18.7198	18.9142	18.1694	17.6781	17.7882	17.8224	17.8861	18.0086	17.3708	16.564	18.2316	17.6833	17.3173	16.8081	16.87	19.5411	17.1531	18.7014	17.7254	18.2082	17.5562	18.1754	17.2533	17.9037	16.8857	17.6521	17.1126	18.2741	17.2874	18.497	18.3061	19.0948	18.7289	17.2868	20.0246	19.4179
TUFM	2	METAB	#N/A	#N/A	#N/A	#N/A	NA	16.9598	16.3627	17.4678	16.8052	16.7411	17.1818	16.4398	17.3065	16.6907	17.5998	16.8548	16.3904	16.8867	17.3638	16.7815	16.886	17.0558	17.1036	16.3933	17.0322	16.8324	15.7885	16.6455	16.0358	16.8048	16.8615	15.9985	16.3298	16.7463	16.6767	16.8812	16.7256	16.651	16.1982	17.2575	15.7207	17.4038	16.3635	16.2565	17.119	15.6089	16.2518
CCT3	not-sig	not-sig	#N/A	#N/A	#N/A	#N/A	NA	16.9192	17.3001	17.1746	16.5244	17.1028	16.8646	17.0793	17.0749	17.2297	17.5762	17.0603	16.9705	17.3609	16.8013	17.2026	17.2886	16.926	17.1203	17.0141	16.8883	16.5973	16.5481	16.7811	17.1712	17.2517	16.9676	17.2843	17.3162	17.1906	16.9316	16.8678	16.8146	17.4679	17.3199	17.1044	17.2793	16.9082	17.6481	16.4377	16.8459	16.662	16.6105
DSTN	not-sig	not-sig	#N/A	#N/A	#N/A	#N/A	NA	17.2644	16.4554	16.0909	15.7307	15.8566	15.7519	16.1852	15.7498	15.5777	15.9833	16.3737	16.1179	17.0586	16.9835	15.7353	16.5763	15.8626	16.7801	16.3764	17.088	16.6064	16.1648	16.2211	16.0408	16.4951	15.2429	17.3937	16.0802	16.485	16.4611	16.7446	16.5021	15.8748	15.7697	16.5519	16.3033	15.9779	16.4088	16.3267	15.8583	16.4301	16.3867
DMD	not-sig	not-sig	#N/A	#N/A	#N/A	#N/A	NA	12.6084	11.8736	13.5721	11.9131	11.2616	12.7124	14.004	12.8194	10.6696	12.0747	12.441	11.4033	14.142	13.5343	11.9058	12.8643	12.3464	14.5419	12.8289	12.5859	13.9645	13.1787	12.8882	12.4997	12.7876	13.3703	11.8469	12.5225	13.2427	12.2632	12.2719	11.5297	13.3418	15.0616	15.8111	12.3676	12.719	11.7891	13.898	12.2711	14.4433	14.5763
S100A14	not-sig	not-sig	#N/A	#N/A	#N/A	#N/A	NA	13.0302	13.9114	12.1589	12.6391	12.7385	12.7173	15.4858	12.674	12.5931	13.1835	12.7395	14.3407	13.4121	13.4781	13.3288	13.9889	12.8228	14.989	12.8089	13.5129	12.2255	11.4093	14.6181	13.651	13.3121	10.6012	12.6648	12.1728	14.9679	12.0331	11.6016	13.025	12.8052	12.7554	12.2906	14.2073	12.3249	15.4486	13.2888	13.5464	14.2127	13.5155
UBQLN1	not-sig	not-sig	#N/A	#N/A	#N/A	#N/A	NA	13.3002	13.7296	13.6703	13.1505	12.6831	13.2453	16.9484	12.4155	14.0983	13.3318	13.4387	13.7681	13.6096	13.5542	13.2969	13.4206	13.515	13.4105	14.0275	13.7804	12.9918	13.4615	13.2338	13.4441	13.3494	13.4525	13.6751	13.1202	13.255	13.6536	13.3612	13.0759	14.282	13.7096	13.2963	13.5259	14.0282	13.2674	13.4816	12.7317	12.8535	12.8626
ANXA8	not-sig	not-sig	#N/A	#N/A	#N/A	#N/A	NA	14.3886	14.8017	13.1175	14.2441	13.8178	14.0846	16.2375	13.8626	13.3257	12.9156	14.2514	13.2558	13.6506	13.7716	11.8787	13.902	13.6914	12.7292	13.7851	13.6449	13.9337	13.0922	13.8048	13.3954	13.6379	14.0604	14.645	14.043	13.4972	14.0917	13.1232	14.0746	12.3664	13.8624	13.746	13.6022	13.0148	12.4041	13.8014	13.9013	13.1167	13.5631
C7orf50	not-sig	not-sig	#N/A	#N/A	#N/A	#N/A	NA	13.7282	12.6951	14.4895	14.3731	13.5866	13.9106	17.2754	13.2324	13.3143	13.3342	13.3654	13.6715	13.716	13.7346	14.1474	14.1166	14.8288	14.2749	13.3181	13.3097	13.9203	14.1444	13.6183	13.0488	12.9072	14.0003	14.079	13.0707	13.0532	12.3756	13.191	13.4245	15.7967	12.2908	13.238	12.659	13.4443	13.543	13.0366	12.902	11.6898	12.3059
INPP1	not-sig	not-sig	#N/A	#N/A	#N/A	#N/A	NA	12.6723	13.3195	12.6907	12.0154	13.9189	12.8599	12.4671	13.2068	13.6506	13.2925	12.3983	13.7468	13.7867	12.6617	12.28	13.8546	12.0425	14.7976	13.3707	14.0049	13.2802	14.0608	12.81	14.0782	12.7043	10.9315	13.7961	13.7374	12.712	12.5601	13.586	13.7061	12.1758	13.5787	12.8774	14.5289	13.8804	15.0445	12.2083	12.5786	14.3008	13.4883
TTC37	not-sig	not-sig	#N/A	#N/A	#N/A	#N/A	NA	14.3538	14.0281	13.6515	14.1305	12.3246	13.8445	12.6376	13.9884	13.9632	13.9603	14.2855	14.4801	13.9003	14.0479	12.7704	14.136	13.6914	12.451	14.0346	13.6087	14.3814	14.4199	14.2398	13.6074	13.8067	13.3598	13.3455	13.8753	13.3411	14.4483	14.2814	14.7246	15.065	14.0283	14.3033	15.0371	14.0265	13.7824	13.5549	14.6295	14.0361	14.0329
MFAP2	1	EMT	-0.422789	0.129986	0.68614	0.097057	NA	14.4802	13.0448	13.9721	14.5612	13.957	14.0673	11.4093	14.9487	14.5396	12.1241	13.1727	11.7635	14.1811	13.2847	13.8549	13.7525	12.6832	13.4566	13.7524	13.672	14.482	15.0312	12.9546	13.2609	12.9383	13.4114	13.7707	14.4767	14.0977	15.599	14.1867	15.57	15.0099	14.6432	13.717	15.3675	13.1302	13.5679	14.5593	15.9667	15.8114	15.0459
HSPB11	not-sig	not-sig	#N/A	#N/A	#N/A	#N/A	NA	13.8615	13.8891	14.2168	13.7706	13.1145	13.5673	16.777	13.3216	13.9054	13.9032	13.9138	13.9216	14.1665	13.6316	13.9236	13.8382	13.4792	14.3941	14.1623	14.0922	13.8089	14.2196	13.4527	13.7686	14.0053	13.7176	13.8125	13.647	13.7396	13.5173	13.8123	13.6364	14.2969	14.0661	13.5787	13.5964	13.9876	13.8365	13.7298	13.4302	13.9412	13.9624
ZNF326	3	CANONICAL	#N/A	#N/A	#N/A	#N/A	NA	13.5724	13.4224	14.2013	13.6894	13.5871	14.0566	11.6476	13.1321	14.1967	12.4474	13.2829	13.9595	12.8835	13.3812	13.9293	13.6818	13.8628	12.5667	13.1621	13.7583	14.4773	13.6335	13.9506	13.6483	13.9324	14.3799	13.349	13.6496	13.8277	13.5999	14.4442	13.5008	12.6458	13.7694	13.6534	13.5673	13.8514	13.5231	13.9332	13.8223	12.4685	13.0216
LGALS9B	not-sig	not-sig	#N/A	#N/A	#N/A	#N/A	NA	12.3941	13.7238	13.1023	13.79	11.1925	12.7746	14.6079	13.1353	14.2381	13.5227	13.2081	13.9234	13.3135	14.418	13.1492	14.1788	13.154	14.5287	13.2155	13.3348	12.8199	12.6887	14.4271	14.0972	12.9505	12.7779	13.6129	14.7949	14.2157	14.5095	13.9185	14.1655	14.589	14.4336	15.0977	12.9064	14.0099	13.0933	14.4832	14.6883	14.2566	14.194
B4GALT4	not-sig	not-sig	#N/A	#N/A	#N/A	#N/A	NA	12.9416	13.6948	11.1717	13.4744	11.6443	13.6763	14.5427	13.0776	12.91	12.264	14.3376	13.2965	14.5856	13.7962	12.619	13.7557	12.4037	11.6783	13.1497	12.8723	12.7815	14.6193	13.7738	13.3602	13.2729	11.9093	10.7612	12.058	12.6428	13.8141	12.8327	12.0426	12.3201	11.2643	12.3516	14.3124	13.6486	14.1084	13.6378	11.4462	13.102	13.6688
HSPA1L	not-sig	not-sig	#N/A	#N/A	#N/A	#N/A	NA	17.8304	17.4834	17.584	17.6671	17.0518	17.5226	17.1454	17.4084	16.6729	18.1725	17.5992	16.6974	18.4768	17.8781	17.4234	18.0997	17.0141	18.5366	17.7331	17.8905	17.5165	17.424	16.8099	17.0567	17.8485	17.7394	17.6636	17.772	17.3651	16.2467	16.2209	17.3153	17.7362	17.4863	16.9795	17.4857	17.1701	17.2402	17.2547	17.577	16.6687	17.2863
CYP3A5	not-sig	not-sig	#N/A	#N/A	#N/A	#N/A	NA	12.151	15.4956	15.1874	16.0507	11.7208	15.5558	13.8467	11.8208	12.7112	13.6239	13.9277	13.8623	15.1323	15.7175	11.9978	15.4065	12.1023	13.6224	15.5829	13.321	13.8311	13.7905	14.867	12.7742	12.754	11.5019	12.9029	13.757	13.5022	14.7094	11.8582	14.6594	13.6966	13.2154	13.2848	14.225	13.1185	12.8636	15.2641	16.379	12.1966	16.4728
FTL	4	IMMUNE	#N/A	#N/A	#N/A	#N/A	NA	17.5745	15.9612	16.8544	16.8893	17.1041	15.6307	15.3704	17.1223	14.7524	15.7408	15.6552	16.9267	16.9572	15.7811	14.9086	14.7791	16.2515	18.4421	16.406	14.833	15.1777	17.1448	14.9966	13.9542	15.6769	14.0785	14.8163	17.2597	14.6317	15.6889	15.5733	16.8594	16.1813	15.6144	14.6148	15.8471	17.0893	16.0536	14.6446	14.4819	17.04	17.0486
POLB	not-sig	not-sig	#N/A	#N/A	#N/A	#N/A	NA	11.2453	11.6283	10.9599	11.8095	12.4237	12.1017	10.4752	10.543	11.3638	11.7521	11.6099	11.0759	12.6243	12.7926	11.5742	12.4329	11.4017	11.9655	12.7022	11.7742	11.9267	12.0561	10.9927	11.7165	10.7882	11.7417	10.4396	11.6207	12.3646	13.0583	11.9319	11.3875	10.3053	11.7331	11.9372	11.0064	11.6202	10.695	10.6099	11.6112	9.98602	11.954
EIF6	not-sig	not-sig	#N/A	#N/A	#N/A	#N/A	NA	14.9712	14.3064	15.8227	15.1552	13.7743	15.4853	16.1951	14.5442	15.5462	15.0548	14.4824	14.4904	15.1702	15.1275	14.8718	15.426	15.3281	15.0318	15.2258	15.8603	15.3337	14.5667	14.3127	14.7297	15.0567	15.3725	14.7415	15.0821	15.3244	14.7535	15.4159	14.805	16.2996	15.2927	15.0475	14.6895	15.1927	14.67	14.877	15.3003	14.471	14.4659
SNX6	not-sig	not-sig	#N/A	#N/A	#N/A	#N/A	NA	14.1074	14.7131	14.6494	14.7348	15.0667	14.8136	16.9904	14.415	14.5675	14.91	14.2065	14.347	14.4119	13.6769	14.332	14.4184	13.5084	15.5931	14.6267	14.4164	14.5537	14.828	14.3485	14.315	14.328	14.2448	14.5727	14.9477	14.5388	14.7924	14.1402	14.4481	13.9278	14.0607	14.3494	14.5009	14.4724	14.9251	14.8876	14.4421	14.7791	15.1908
SURF6	not-sig	not-sig	#N/A	#N/A	#N/A	#N/A	NA	13.154	12.85	12.6344	13.2222	13.0566	13.193	12.6792	12.567	12.9181	8.95442	12.8991	12.9281	11.3075	12.6666	12.9099	12.8862	13.3015	8.16656	13.066	12.4877	13.121	13.3003	13.244	13.1105	12.3592	13.4339	13.1328	13.2445	13.1575	13.439	13.1184	13.1099	12.7137	13.4849	13.2006	13.447	12.1259	12.7305	12.976	13.2061	12.6685	12.4876
HDAC2	not-sig	not-sig	#N/A	#N/A	#N/A	#N/A	NA	15.6802	15.6798	15.6245	15.5972	15.8572	15.8555	13.458	15.7269	15.6409	15.6804	15.6398	15.6297	15.958	15.6723	15.6953	15.585	15.6502	15.215	15.5917	15.5825	15.6701	15.6733	15.5832	15.6927	15.783	15.6811	15.6886	15.6612	15.7262	15.6181	15.6634	15.6449	15.7283	15.5765	15.6845	16.0762	15.7401	15.8625	15.6322	15.7433	15.6829	15.7631
MOB1B	not-sig	not-sig	#N/A	#N/A	#N/A	#N/A	NA	14.838	14.7759	14.7799	14.5847	14.8269	14.5471	16.7016	14.3531	14.83	15.2365	14.7235	14.8867	14.2194	13.9869	14.8767	14.5551	14.691	15.2485	14.9747	14.7096	14.7565	14.903	14.2982	15.0196	13.7733	15.0024	14.9178	15.0596	14.2802	14.5743	14.656	14.1779	15.0005	14.4845	14.5759	14.6563	13.951	14.6333	14.5011	14.2071	14.3664	14.1282
NKRF	not-sig	not-sig	#N/A	#N/A	#N/A	#N/A	NA	13.0126	12.3846	13.1644	13.9163	11.3596	12.8327	13.6163	12.8408	13.488	12.651	11.604	13.1999	11.8166	13.4105	12.9908	13.0218	13.2342	11.5231	12.5806	12.5807	13.1485	13.6856	13.7286	12.7788	13.3008	13.1861	11.4442	12.6345	12.8067	12.5313	13.2678	12.8986	12.7875	12.6458	13.5322	13.2752	11.8655	12.4214	12.6442	11.8779	14.4651	10.6271
GLRX3	not-sig	not-sig	#N/A	#N/A	#N/A	#N/A	NA	15.5124	14.6175	15.1752	15.3896	15.6747	15.2482	16.1703	15.7291	15.6775	15.8787	15.1671	15.9877	14.7958	15.7518	15.7754	15.9393	16.477	15.8454	16.6891	15.9771	15.3621	15.5002	15.4369	15.6739	15.9886	15.8807	16.2445	15.8835	15.9694	15.141	15.6196	15.464	15.9796	15.7421	15.74	15.8907	15.5254	16.0136	15.3866	15.0463	15.4499	15.3839
BRI3BP	not-sig	not-sig	#N/A	#N/A	#N/A	#N/A	NA	13.8855	14.2303	14.2607	13.1063	14.8262	13.1677	14.1181	14.5027	14.7849	14.8235	13.2093	14.4632	14.77	13.2349	14.4197	14.2988	13.6297	16.0066	14.2009	14.7781	13.7243	13.0939	13.8307	14.5827	15.0889	13.7727	15.2217	13.9003	14.1748	13.759	14.0191	14.8881	14.491	13.7211	14.0152	14.5943	14.8819	13.6031	13.7533	14.6637	13.4821	13.453
BCS1L	not-sig	not-sig	#N/A	#N/A	#N/A	#N/A	NA	14.8771	14.2371	13.9584	14.4577	14.0719	15.3395	12.2541	14.4374	14.9207	15.3937	15.0748	14.3507	15.0144	14.5801	14.2363	14.5501	14.2623	12.7411	14.5381	14.56	14.1434	14.6592	13.66	14.3139	14.7681	14.8285	11.2991	14.8593	14.2551	14.5837	14.5089	14.2191	14.53	12.6958	13.7142	13.9411	15.3258	13.7272	14.0824	14.0988	15.1937	14.5768
GC	not-sig	not-sig	#N/A	#N/A	#N/A	#N/A	NA	13.9183	14.9647	15.1002	15.1489	14.6375	14.145	16.7709	16.1699	14.9332	14.14	13.9491	14.5804	15.2723	14.9141	13.6869	14.0488	13.9625	15.4044	14.4742	14.0695	13.9002	15.6082	13.2975	14.4404	14.4425	14.7737	14.2472	14.9576	14.0255	14.1917	13.6669	15.0894	14.7951	14.8129	14.0338	14.7522	14.9415	15.7878	14.5137	14.6721	15.2582	15.6462
MRPS18A	not-sig	not-sig	#N/A	#N/A	#N/A	#N/A	NA	11.9483	12.9862	12.1999	12.9473	13.1791	12.5876	12.3623	12.285	12.3169	11.2356	12.7183	12.0289	9.88483	12.3114	12.2635	12.6515	12.6571	10.7588	12.0191	12.5975	12.1158	11.7809	12.6257	11.9445	11.7508	12.0746	13.8262	12.1577	12.6521	13.7604	12.2209	12.493	12.5297	11.8013	12.1522	11.8066	11.8057	12.3472	12.419	12.4386	12.3972	12.3576
APOL1	not-sig	not-sig	#N/A	#N/A	#N/A	#N/A	NA	11.2035	10.9386	12.4755	10.465	14.1252	9.90767	12.6287	12.9896	11.0823	12.1682	10.1062	12.2095	8.84911	11.9386	11.8072	9.92512	12.0946	12.516	12.0303	10.9821	11.0517	12.8946	12.8318	12.8839	11.4859	11.5235	9.19436	12.1826	11.715	11.7994	12.2211	13.7536	11.4658	13.0971	12.7037	13.1801	13.2175	12.8044	12.1414	10.7319	15.224	14.4982
FBP1	not-sig	not-sig	#N/A	#N/A	#N/A	#N/A	NA	14.042	14.52	13.8233	15.1149	14.1073	14.3321	16.1435	15.4521	14.1167	14.9867	14.3737	13.5744	14.5366	14.396	14.4026	14.4072	13.7412	15.1508	14.3655	14.1291	13.6271	13.7271	14.2753	14.0588	12.9686	13.7544	15.0724	14.0306	13.1275	14.2113	13.2439	14.1261	15.1517	14.1158	13.9509	13.4159	13.8911	13.1581	14.2321	14.0919	14.2515	13.5601
PSME1	2	METAB	#N/A	#N/A	#N/A	#N/A	NA	17.3223	16.9043	16.562	17.1487	16.9477	18.0107	16.6101	16.1793	16.8563	17.3049	17.0711	17.3878	16.9679	17.1	17.9088	16.66	16.8265	17.659	17.4491	16.9875	16.8168	17.1906	17.2606	17.1959	17.2803	16.6326	17.1993	18.0217	17.3721	17.3592	16.9497	17.1069	16.9931	17.2519	17.3878	17.328	17.2952	16.7943	17.0503	16.4157	16.7297	16.3403
ORM1	not-sig	not-sig	#N/A	#N/A	#N/A	#N/A	NA	16.2912	17.506	17.7362	15.8431	17.6711	16.5757	17.9129	18.1994	16.9696	16.9952	16.1758	16.8586	17.8569	16.0704	16.4066	15.395	16.3946	17.4293	15.9894	15.8017	15.5925	18.1541	15.7886	17.1826	16.4113	17.4582	16.7167	17.8482	16.0018	16.5621	16.5482	17.1269	15.6044	16.711	16.2601	16.1387	17.24	18.4298	16.1757	16.3345	19.0585	19.1499
ATP6V1C1	not-sig	not-sig	#N/A	#N/A	#N/A	#N/A	NA	13.3505	13.254	13.81	14.019	14.2584	14.111	14.9417	13.77	13.7621	13.845	13.6182	13.6788	13.9407	13.7103	13.6394	13.4406	13.5663	14.9908	13.7886	13.3239	13.581	13.6143	13.6788	13.5948	14.065	13.0423	13.2347	13.9068	13.4594	13.66	13.5104	13.7998	14.6693	13.6386	13.3845	12.8977	13.9642	13.7957	13.4519	13.3595	13.7498	13.6521
RHOC	not-sig	not-sig	#N/A	#N/A	#N/A	#N/A	NA	15.1813	15.9219	14.7	15.4175	13.8114	14.815	16.4308	15.8618	15.076	14.9707	15.5407	15.31	16.029	16.087	15.303	15.7988	15.5721	14.546	14.5674	15.9658	14.7944	15.427	16.2266	14.8421	15.5562	15.4359	16.1222	15.3241	15.8013	14.9661	14.2714	15.0155	15.346	16.0643	14.552	15.0289	15.8946	17.2719	15.5415	15.6694	15.1318	15.4556
CASP10	not-sig	not-sig	#N/A	#N/A	#N/A	#N/A	NA	13.2406	12.5788	13.0182	12.5262	15.8772	12.9115	13.8346	14.0889	12.9115	13.7169	13.0041	13.4407	12.0023	13.7609	13.4143	13.8002	13.6896	14.4481	13.0278	13.5559	13.0764	13.7855	13.5483	13.0265	12.8198	11.4295	13.4746	13.7813	12.7107	13.8533	13.3788	14.0647	12.6758	14.0791	14.2845	12.252	12.7689	13.4349	13.8847	13.3048	14.0319	13.6475
FXR1	not-sig	not-sig	#N/A	#N/A	#N/A	#N/A	NA	13.0394	13.4201	12.5847	13.402	12.2507	13.8188	16.2331	13.3375	13.2052	14.0694	13.5126	13.591	12.9659	13.9091	13.8872	13.8091	14.3375	14.3826	12.689	14.191	13.9245	13.3923	13.1095	14.1391	13.7355	13.4374	13.7334	12.3742	13.4743	13.7846	13.3607	13.1372	12.2963	13.7794	12.9836	13.6863	13.1332	13.9679	13.6383	12.9948	13.0703	12.6913
MAGT1	not-sig	not-sig	#N/A	#N/A	#N/A	#N/A	NA	14.9295	14.3189	14.3259	13.9959	14.0661	13.5059	13.8391	13.8633	14.1207	14.2406	14.2456	14.3538	13.3078	13.9635	14.0032	14.1595	14.6861	12.6261	13.7841	13.9492	14.6175	13.7158	14.939	14.0072	14.1868	14.6979	13.404	13.1727	14.2568	14.8399	14.8905	14.2233	13.6816	14.582	14.3218	14.4786	14.4334	13.3435	14.4773	14.4633	15.0504	14.4626
PCYOX1L	not-sig	not-sig	#N/A	#N/A	#N/A	#N/A	NA	12.6526	12.1322	11.9964	12.2718	12.6558	12.6256	14.6812	13.0846	13.2943	12.643	13.3115	12.3611	13.7514	12.2872	12.6473	12.948	10.9875	14.3738	11.6581	12.5082	12.32	13.8458	12.6932	13.3905	12.979	12.9598	10.9518	12.5673	13.3816	13.1366	12.6125	12.4359	12.8179	12.3654	11.4934	13.544	10.8879	11.2044	12.766	12.8943	12.4111	12.1401
HAX1	not-sig	not-sig	#N/A	#N/A	#N/A	#N/A	NA	13.7491	13.4282	13.1005	13.5673	12.9041	13.1048	10.6437	12.7757	13.3564	12.6175	13.606	13.2739	13.3768	12.6019	12.9837	13.2302	14.0536	10.9383	13.4323	13.2157	13.4594	13.4737	12.7716	13.4275	12.5336	12.3483	13.0099	12.7802	13.1347	13.1489	13.2671	11.9755	10.8542	12.672	12.8615	12.3925	12.9843	11.8372	12.9004	14.3878	13.2961	13.2804
AK1	not-sig	not-sig	#N/A	#N/A	#N/A	#N/A	NA	16.1425	16.1163	14.8141	15.099	16.7589	16.3543	15.4701	15.6785	15.5112	15.0183	14.49	16.4922	16.836	15.456	15.5777	15.9824	15.3376	15.2745	15.7446	16.1927	14.2573	15.1879	14.104	15.8169	16.1681	14.7812	15.7298	14.457	15.4574	14.7428	15.258	15.0313	13.9479	15.6954	15.8264	16.1288	15.8136	15.949	15.1417	14.9821	16.3579	16.3536
RPLP2	not-sig	not-sig	#N/A	#N/A	#N/A	#N/A	NA	15.0448	15.6757	15.4554	15.0455	14.9576	15.2263	15.3002	15.7851	15.5819	15.6798	15.8899	15.5979	15.5249	15.5014	15.9161	15.7782	15.7617	15.5634	15.3229	15.8087	15.6768	15.0757	15.5255	15.5268	16.0536	15.0382	15.6473	15.0744	15.8118	15.2029	15.6895	15.7366	17.3437	15.7224	15.4371	15.8883	15.989	15.9502	15.6463	15.633	15.1877	15.8957
NT5C2	not-sig	not-sig	#N/A	#N/A	#N/A	#N/A	NA	14.5977	12.5526	13.4399	13.4217	13.2012	13.9267	12.8382	13.3232	14.6158	13.5469	13.9051	14.2223	14.3919	14.2175	14.3987	14.3864	14.1441	14.7528	14.1784	13.9262	14.8437	13.8233	14.0853	13.9984	14.2432	13.9753	14.0338	14.3781	13.9226	13.8638	14.2265	14.7765	13.0188	14.2555	14.3719	14.0143	13.2557	14.2564	14.405	13.3059	13.8623	12.9221
TPPP3	not-sig	not-sig	#N/A	#N/A	#N/A	#N/A	NA	15.1983	12.7889	13.88	12.2373	10.4966	12.8752	15.5736	11.8246	12.2622	11.8103	11.9841	13.3177	12.9027	13.9778	12.2689	12.4691	11.9126	11.2662	12.6985	12.0454	12.2652	13.0042	11.675	12.1197	13.3952	11.6954	13.169	12.2643	12.2207	12.9912	12.4935	12.1208	11.6815	11.6085	12.3218	11.0941	12.6836	11.8491	12.4612	12.0239	12.8582	11.3428
SWAP70	not-sig	not-sig	#N/A	#N/A	#N/A	#N/A	NA	12.7202	13.7655	12.6701	13.3479	14.8465	11.9517	15.0212	13.3666	13.1491	11.961	12.3969	12.2303	13.4258	12.1671	13.3657	11.5751	13.0965	11.6553	13.2018	11.875	13.2506	13.923	12.896	12.9965	12.7165	13.9674	13.3346	13.2655	12.4797	12.5963	11.8617	13.321	12.091	12.9735	13.7848	13.4544	12.9835	13.9107	12.8321	12.7578	14.5141	14.0029
DHX16	not-sig	not-sig	#N/A	#N/A	#N/A	#N/A	NA	12.4538	13.9383	13.8673	13.5045	13.6748	14.2696	14.633	13.6142	13.9328	14.4829	12.4399	13.7278	14.4802	13.5683	12.898	13.7653	13.5815	16.0742	13.8189	13.316	13.4396	13.6658	13.6651	14.5717	13.6903	13.827	14.1277	13.7352	14.2042	14.3162	14.7258	13.5097	13.1442	13.9546	13.5604	13.3889	14.0478	13.8458	14.1484	13.7247	14.5329	14.1961
SMC2	not-sig	not-sig	#N/A	#N/A	#N/A	#N/A	NA	16.7546	16.1623	16.1735	16.4701	16.4144	16.597	13.0048	15.7334	16.6935	15.849	16.2148	16.6013	15.9794	16.6559	16.5211	16.6356	16.3143	14.7138	16.8945	16.8185	16.5418	16.4136	16.628	16.3769	16.2757	16.8394	16.7892	16.1165	16.3278	16.6816	16.4845	16.0661	15.2058	15.4892	15.0984	16.0932	14.8822	16.0387	16.5477	16.2901	14.1921	15.6565
CRYAB	1	EMT	0.301512	0.173954	1.54241	0.104589	YES	11.9759	11.0566	13.3674	13.7687	12.5873	11.3338	16.1709	13.9684	13.2505	12.5519	12.382	12.547	13.3446	12.5573	11.8085	12.0483	12.1528	13.9237	13.2347	12.5004	12.5211	12.6504	11.8033	12.5344	12.1726	12.1317	12.2343	11.8123	11.6891	12.5344	12.1664	12.7081	12.358	11.4752	11.6186	11.7461	12.4194	12.3449	12.4447	11.611	14.4261	13.7338
FTCD	not-sig	not-sig	#N/A	#N/A	#N/A	#N/A	NA	11.289	13.4093	13.0343	14.0106	12.8489	12.5692	13.7512	13.5049	13.1538	12.9129	13.0823	12.3166	12.7738	13.4027	12.1582	12.0145	12.6274	12.6643	12.7144	12.9287	12.3963	13.4781	11.146	12.7269	12.3782	12.3191	13.9477	12.9031	12.2024	13.5675	11.2699	13.0285	11.6935	13.1061	11.5419	13.0834	13.0291	13.3082	11.8171	11.9084	13.7879	14.6339
ZDHHC13	not-sig	not-sig	#N/A	#N/A	#N/A	#N/A	NA	13.3875	13.6228	13.2683	12.7647	13.9367	14.0282	14.8061	14.2663	13.1758	13.4468	13.9597	12.8668	13.5253	14.0327	12.633	14.2578	13.4454	13.4829	12.1923	13.8054	13.5004	13.3859	13.2023	14.1887	14.576	14.1923	14.4129	13.8136	14.0395	12.2339	13.0778	12.6239	12.5458	13.3386	13.8111	14.6562	12.9925	13.954	14.4731	14.3729	12.1468	15.07
HTATIP2	not-sig	not-sig	#N/A	#N/A	#N/A	#N/A	NA	15.0123	14.8053	14.2457	14.2702	13.9129	15.3753	16.6874	13.5588	13.866	14.4644	14.3875	13.7598	14.1368	14.5287	13.4424	14.4362	14.1348	12.0969	14.0827	14.6874	14.6048	14.2135	14.4879	13.8259	13.8729	13.8296	14.7904	13.8874	13.761	14.2379	14.5578	14.3648	12.4559	14.1862	14.4812	14.2055	14.8593	14.1169	13.7854	14.5697	13.2945	13.6267
EML2	not-sig	not-sig	#N/A	#N/A	#N/A	#N/A	NA	14.4375	15.14	13.8873	14.1018	15.2986	14.6336	15.8693	14.53	14.2612	14.9681	14.6315	14.4764	15.2113	14.831	14.4772	15.4627	14.0682	14.5966	14.5015	14.7197	13.7576	13.7322	15.3783	14.5945	13.8417	13.9014	14.1396	14.3578	14.3486	14.5226	14.2459	15.1207	14.0512	14.7556	14.3778	14.9018	14.9718	14.7043	14.3241	14.6635	14.7619	15.0788
CSNK1G3	not-sig	not-sig	#N/A	#N/A	#N/A	#N/A	NA	11.4172	11.6407	10.1855	12.7057	12.295	11.5942	12.5967	10.8101	11.1375	10.45	10.9677	11.5656	9.92535	11.4688	10.5642	11.9953	10.9581	10.7496	11.4292	10.5479	11.2542	10.1269	11.0838	11.5965	10.4374	11.0764	11.7957	10.9522	11.2348	11.0334	11.243	10.0194	10.6004	11.6777	11.707	10.4411	10.8929	11.9975	11.3548	10.659	10.2653	11.292
NDRG2	2	METAB	#N/A	#N/A	#N/A	#N/A	NA	13.1813	13.9195	13.7414	13.0389	12.5206	10.5897	12.0415	13.4807	13.2164	13.5905	13.8482	13.4775	13.3815	13.3303	12.6965	13.4186	13.7182	14.766	12.2786	13.0274	12.2801	11.8209	13.8375	12.8141	12.1715	13.3274	14.4698	14.6161	13.355	13.4441	13.7908	12.6485	14.8706	12.8501	13.831	11.9289	13.8349	13.3862	14.1965	13.4023	13.5495	13.2364
UCHL5	not-sig	not-sig	#N/A	#N/A	#N/A	#N/A	NA	13.7565	13.412	13.6122	13.426	13.6385	12.2801	16.0561	13.1347	13.6225	13.9823	13.5098	13.8547	12.8907	13.3271	13.8686	13.5273	14.2509	13.1537	13.695	13.5457	13.3541	12.7229	13.8703	13.7542	13.5501	13.234	13.1518	13.2919	13.8509	13.512	13.8215	13.3457	14.5449	13.5115	14.0571	13.7686	14.0213	13.4085	13.3571	13.2402	13.3623	12.4957
COA3	not-sig	not-sig	#N/A	#N/A	#N/A	#N/A	NA	13.4411	14.1506	14.1647	13.5361	14.7773	14.233	15.773	13.3751	13.8049	13.1002	13.8652	13.0409	12.7799	13.29	13.0151	13.8802	14.0715	11.9566	12.528	13.9741	14.601	12.9722	13.5745	13.3566	13.4082	13.9088	13.3714	13.2467	13.8267	13.9505	14.0196	13.2819	16.2204	13.0814	14.055	13.3375	13.2203	13.3459	13.0986	14.1874	13.1493	13.0175
RMDN1	not-sig	not-sig	#N/A	#N/A	#N/A	#N/A	NA	14.3523	14.8633	14.5336	14.5802	13.8983	14.8053	11.2326	14.2345	14.8698	15.0383	15.1049	13.7174	14.3255	14.355	14.8663	14.595	14.4777	14.956	14.4158	14.9159	14.2988	13.9024	14.7928	13.7814	13.3826	13.6053	13.6746	14.8433	14.2	14.705	14.1853	14.3371	14.3159	14.021	15.4983	14.0168	15.9377	13.5693	12.7451	14.3659	13.8831	13.3797
EIF2B5	not-sig	not-sig	#N/A	#N/A	#N/A	#N/A	NA	14.0001	13.6351	13.509	13.4803	14.0087	12.9877	13.3282	13.676	12.9849	13.2051	13.9	13.0401	13.4445	13.2938	13.0833	13.4563	12.6771	13.8964	13.5535	13.2667	13.5374	13.4085	13.2864	13.4833	13.0653	13.2238	11.6694	13.5453	13.8003	14.6761	13.2963	13.7341	14.3455	13.7036	13.0343	12.3207	12.6687	12.4139	13.432	12.6756	14.0141	13.394
TLN1	1	EMT	0.171365	0.157331	2.4022	0.106267	YES	16.7046	16.0037	16.3857	17.1753	16.3763	16.305	16.9361	17.1216	16.7175	16.3917	16.7273	16.93	17.0842	16.8043	16.5089	16.2802	16.6482	17.468	17.0213	16.3701	16.4634	17.4294	16.516	16.5792	16.4239	16.1082	16.2533	16.4984	16.6041	16.2821	15.9823	17.0905	16.7767	16.947	16.5187	16.6988	16.9461	16.7025	16.9503	16.5327	17.8337	17.8958
SERPINF1	1	EMT	0.304884	0.125915	1.5998	0.10636	NA	15.5245	14.7231	14.9984	15.4777	14.2551	14.2426	11.5752	15.76	14.4026	14.6999	15.0974	14.3271	14.9696	14.1322	13.6872	13.2724	14.2491	16.6407	14.8339	14.1066	14.1085	16.968	13.1356	14.605	14.0109	13.9099	14.3211	14.9123	14.3189	13.6555	13.6284	15.0805	14.9888	15.2869	13.1568	15.2356	15.2292	14.8677	14.1573	14.0386	15.3098	15.5684
CDC42	2	METAB	#N/A	#N/A	#N/A	#N/A	NA	16.0306	15.6241	15.8336	16.0029	15.7701	15.3285	16.4827	16.0218	15.8608	16.1843	16.0027	15.8149	15.6869	15.7359	15.8885	16.1827	15.8123	17.0506	15.6931	15.7969	15.9934	16.2652	16.2655	16.2074	15.1464	16.2976	15.7115	16.2085	16.035	16.368	16.1675	16.4101	15.8734	16.2308	15.8346	15.9921	15.9733	15.9233	16.4561	16.324	16.8171	16.9408
PLTP	not-sig	not-sig	#N/A	#N/A	#N/A	#N/A	NA	13.6031	12.0686	13.9052	13.9322	13.639	13.2324	17.3209	13.0714	13.4269	13.3772	12.538	12.8798	13.3609	12.1562	12.9908	14.0237	13.8276	11.7562	13.8429	13.2228	13.5867	13.4976	12.0655	12.2595	12.5135	13.6167	13.8758	13.2575	13.3547	14.1783	13.4566	12.6227	12.9067	13.2498	12.5117	9.53112	13.4123	12.5051	13.9265	14.0417	14.1556	13.0557
MGME1	not-sig	not-sig	#N/A	#N/A	#N/A	#N/A	NA	13.956	12.7343	13.2759	10.5007	10.986	11.8545	11.3259	13.3256	11.1028	11.2242	13.3889	12.0638	13.1293	13.794	12.7103	12.7895	11.96	9.22849	12.7938	13.2164	13.2989	12.9805	12.3083	12.1941	13.4358	9.96222	13.9671	12.1659	14.0271	12.3805	13.3749	11.7009	10.8582	13.8437	13.3583	12.9661	13.56	10.5835	13.2463	13.5871	12.5518	9.38154
APPL2	not-sig	not-sig	#N/A	#N/A	#N/A	#N/A	NA	14.1309	12.6891	13.5186	13.9255	13.0988	13.9918	14.9895	13.4665	12.9597	14.8028	13.462	13.0502	14.056	13.0589	13.0349	14.2893	13.596	12.0932	14.1853	12.9284	13.7345	14.0709	13.9069	13.0473	15.9643	13.968	13.2559	13.4232	12.5364	13.4826	13.3642	13.1255	12.8227	14.1174	13.4191	14.9452	15.0782	13.5344	14.0258	13.851	14.8435	15.3664
SOD2	not-sig	not-sig	#N/A	#N/A	#N/A	#N/A	NA	15.8862	16.6662	16.5556	16.5202	17.3257	16.8648	17.3193	17.4412	16.5718	17.6623	16.8184	16.5316	16.277	16.4766	15.6596	16.6978	16.4553	18.4507	17.3229	16.6137	16.1074	18.1468	15.9128	16.34	17.3697	15.2077	16.6442	17.4169	16.4905	17.3659	17.1166	17.4188	16.65	16.8104	16.6227	17.2239	17.4519	16.4171	16.4959	16.8093	17.6194	17.502
LRPAP1	not-sig	not-sig	#N/A	#N/A	#N/A	#N/A	NA	14.3718	15.4323	14.8228	15.1548	15.1425	14.8883	10.1624	15.3311	15.2679	14.8851	14.4284	14.3451	14.0949	15.1181	14.6581	14.6561	14.9824	13.4108	15.0412	14.4691	15.0516	15.5423	14.5653	14.6935	14.9303	14.8196	14.9247	15.7621	15.0188	15.5331	15.0175	15.6876	13.0351	14.1546	13.604	15.5178	14.7371	15.7611	15.6787	15.2484	15.7981	15.9988
SMC4	not-sig	not-sig	#N/A	#N/A	#N/A	#N/A	NA	13.2385	13.7093	14.4468	14.0214	14.0512	13.9493	11.3886	13.9934	14.4136	13.6858	13.9775	14.3046	14.051	13.7939	14.6777	14.0322	13.3069	14.1031	14.4509	13.6333	14.1382	14.5685	14.1602	14.3736	14.3963	14.1242	14.5486	14.4608	14.1949	13.7614	14.2427	13.7815	12.9096	14.4263	13.572	15.0098	13.5766	14.3543	14.0524	13.2082	13.1323	13.0283
CLUH	not-sig	not-sig	#N/A	#N/A	#N/A	#N/A	NA	14.3313	15.0413	15.1004	14.8294	14.2282	14.653	12.3489	14.4953	15.1496	14.6487	15.1836	15.6228	14.2289	15.1934	15.3623	14.4493	15.4969	14.2448	14.6004	14.1327	14.893	14.6429	15.2013	14.8344	14.77	14.814	14.9098	15.4302	15.3142	14.8177	14.7205	14.2986	13.1857	14.632	14.9739	14.6423	14.8539	15.1123	15.2439	14.6186	14.5138	14.9285
RRP12	not-sig	not-sig	#N/A	#N/A	#N/A	#N/A	NA	15.4211	14.7934	15.0065	15.2862	14.8572	15.2771	11.8507	14.8756	15.2317	14.8588	15.2405	15.2001	14.2134	15.3349	15.3444	15.2434	15.1782	14.7846	15.1402	14.921	15.399	14.919	15.1227	15.489	14.9936	15.1844	14.7383	15.5216	15.225	15.1436	15.352	14.6828	15.3652	15.1349	15.6677	14.9225	15.1755	14.9098	14.9569	14.7901	15.0193	14.8455
CA1	4	IMMUNE	#N/A	#N/A	#N/A	#N/A	NA	14.7676	17.3772	16.3526	18.1921	16.1493	16.3484	19.0758	16.4002	18.1799	16.4845	16.401	16.6792	16.5895	18.025	15.1361	17.6683	16.942	16.6303	17.0655	17.2076	15.8578	16.3896	15.4127	17.4068	16.7953	15.6389	17.1418	16.7071	15.8127	17.578	17.06	17.3385	16.4461	17.8626	15.6081	16.5874	17.5499	18.1197	17.9477	16.5269	18.8748	19.2781
ST13	not-sig	not-sig	#N/A	#N/A	#N/A	#N/A	NA	17.5996	17.1524	17.0445	17.2813	17.7397	16.6266	16.5565	17.1296	17.1113	16.5223	17.2067	17.0559	16.59	16.8604	17.2834	16.8393	17.199	15.5354	16.8617	17.4187	17.1243	17.0346	16.8339	17.1848	17.5858	17.5989	17.42	17.1622	16.9661	17.1441	17.615	17.0041	17.4077	17.1901	17.563	16.8007	17.3025	17.2473	16.6936	16.6384	16.7988	16.838
CCDC47	not-sig	not-sig	#N/A	#N/A	#N/A	#N/A	NA	14.2862	14.1142	13.9207	14.4165	13.9838	14.0052	16.7487	14.0637	14.2564	13.7731	13.9451	14.0259	13.5039	13.9474	14.1047	13.95	14.2194	12.8912	13.2367	14.4463	14.1955	13.6119	14.4618	14.314	14.4243	13.8345	14.2811	14.2889	14.0828	14.0569	13.9343	14.1685	13.4505	14.3405	13.9268	14.3193	13.8222	13.7708	14.3549	14.7767	14.2002	15.0112
SHTN1	not-sig	not-sig	#N/A	#N/A	#N/A	#N/A	NA	13.915	13.5606	13.211	13.6628	14.0288	13.0899	11.9317	13.0834	13.5201	13.6079	13.9163	13.609	13.2617	13.5405	14.061	13.8351	14.5291	12.5365	13.9598	13.7601	13.7757	13.2082	13.6869	14.0664	13.9093	14.1569	13.7602	13.8867	13.9709	13.8997	13.9007	13.8964	16.3668	13.4221	13.8609	14.1026	13.6536	13.9423	13.849	13.4868	13.1548	13.5376
FUBP3	not-sig	not-sig	#N/A	#N/A	#N/A	#N/A	NA	13.3444	12.9154	13.9379	13.3857	14.0082	13.9019	16.7667	14.1308	13.9748	13.1684	13.4014	13.9215	13.1739	13.6054	13.9784	13.5651	14.2717	17.1198	13.9545	13.5787	13.8449	13.6232	13.286	13.8005	13.4267	14.2922	13.5213	13.4058	14.0626	13.25	13.7332	12.9783	18.1351	13.6789	14.3363	13.893	13.0777	13.2618	13.1923	13.5497	13.0048	12.3026
STX6	not-sig	not-sig	#N/A	#N/A	#N/A	#N/A	NA	13.0378	13.9112	14.0109	16.7679	13.9724	15.2896	13.7448	14.3751	14.161	14.2436	14.1204	13.477	12.8435	13.5739	13.97	14.0774	14.4965	15.1239	14.1348	13.7698	13.9718	13.6601	13.4283	13.9366	15.9819	13.7531	13.8619	13.9452	12.0294	14.38	14.0705	12.8217	13.5946	12.9166	14.6596	15.6777	13.0729	15.4589	14.335	14.4754	15.1982	14.301
DDRGK1	not-sig	not-sig	#N/A	#N/A	#N/A	#N/A	NA	14.589	13.6179	14.3655	13.8843	14.9331	14.0103	13.8156	14.5068	14.1648	14.2968	13.7968	15.0823	13.7625	14.597	14.1933	14.3215	14.4964	13.5727	14.4129	14.6769	14.7991	14.433	14.8891	14.6986	14.2822	14.2311	14.5147	14.511	14.7283	15.069	15.21	13.9819	15.1275	14.5366	15.3127	14.934	15.5777	15.4024	14.3363	14.7473	15.0239	15.4398
GNB1	not-sig	not-sig	#N/A	#N/A	#N/A	#N/A	NA	13.5624	13.4871	13.7558	13.5247	14.4749	13.5631	16.9454	14.9037	13.5664	13.1951	13.2706	13.7847	13.827	13.8484	14.0688	14.559	13.853	14.0701	14.2377	13.5491	13.9744	14.7588	14.0394	14.4413	13.6274	14.3025	13.6114	14.3932	14.2871	14.1653	14.0989	14.4059	12.5268	13.7738	13.6107	13.5099	13.2597	13.7996	14.6219	14.8741	14.7042	14.2227
HNRNPH3	not-sig	not-sig	#N/A	#N/A	#N/A	#N/A	NA	14.3783	15.0566	14.9508	14.8537	15.246	15.4282	17.885	14.4121	14.6687	14.5378	14.7639	14.2215	15.8161	14.4209	14.6974	14.5855	14.9732	13.7797	14.7994	15.0982	14.8162	15.1717	14.4561	14.1535	14.9206	15.4642	15.7173	14.7071	14.6354	15.1725	14.7305	14.7142	14.6109	14.5924	15.2245	15.3393	13.9248	14.5857	14.3746	15.1397	14.668	14.5231
ATG4B	not-sig	not-sig	#N/A	#N/A	#N/A	#N/A	YES	12.1091	15.4155	12.8754	12.2024	13.9906	14.1676	14.8892	12.2858	11.9162	14.3053	14.6709	14.246	14.5774	14.7968	12.6161	15.0057	14.6493	15.4727	14.6498	14.5355	14.1422	15.5191	12.1389	14.8401	15.4437	13.7092	16.3667	14.0949	12.5551	16.1486	14.2023	15.3066	13.284	15.1197	12.135	13.581	15.6328	16.399	13.6926	15.7203	11.1594	15.6015
TCF20	not-sig	not-sig	#N/A	#N/A	#N/A	#N/A	NA	13.508	13.3885	14.2821	11.9875	12.1518	12.7659	12.6555	12.3757	12.8065	11.9809	13.0475	12.9016	12.7693	12.1216	12.719	12.9272	13.8432	11.4301	12.7056	13.2411	12.7174	12.2005	12.7457	13.0058	13.6625	13.1584	12.7253	13.5186	13.156	12.5016	12.9718	13.3172	12.2474	12.743	12.7732	13.5624	11.911	11.2483	13.1413	12.329	11.2146	11.9093
ACP1	not-sig	not-sig	#N/A	#N/A	#N/A	#N/A	NA	15.9839	15.6161	15.6296	15.3874	15.1582	15.9552	15.5839	15.504	15.105	15.028	15.8504	15.6548	15.4003	15.4848	14.9906	15.9731	15.695	15.4362	15.5795	15.9106	16.0116	15.0335	15.1041	15.3996	16.3944	16.6472	15.857	15.8861	15.5735	15.2281	15.8889	15.6548	15.3231	15.273	15.5923	16.0849	15.8794	15.7428	15.0978	15.0467	15.15	15.5635
PANK2	not-sig	not-sig	#N/A	#N/A	#N/A	#N/A	NA	12.6501	12.4275	13.7189	13.6486	13.1777	14.0846	11.9642	11.8944	9.1382	11.0449	13.6754	13.1162	12.9104	12.7487	13.4905	11.2487	13.959	12.8987	13.0698	13.8879	11.4985	13.1298	13.7662	12.8817	13.2818	12.8309	13.1562	12.0908	12.2936	14.6443	9.39229	12.4775	11.9203	10.4136	9.43364	13.7425	11.4988	13.7407	12.7646	10.6125	13.5328	13.4136
HSP90AB1	3	CANONICAL	#N/A	#N/A	#N/A	#N/A	NA	20.3613	20.3586	20.7476	20.5197	20.9948	20.511	20.0456	20.2218	20.2953	18.8181	20.2841	20.59	20.2772	20.3356	21.1935	20.4654	20.5795	19.2443	20.4586	20.2154	21.147	20.7062	20.5823	20.5052	20.134	20.7518	20.457	20.8621	20.6761	20.2686	20.5792	19.9584	20.5087	20.4944	20.6767	20.4208	20.149	20.3574	20.2062	20.4683	19.9567	19.7723
ACE	not-sig	not-sig	#N/A	#N/A	#N/A	#N/A	NA	13.8713	13.2074	12.8789	14.2986	13.893	13.3912	13.9685	13.5972	13.3837	13.7347	12.5846	12.8841	13.0731	13.2421	13.5197	11.3335	13.0067	11.5443	11.9147	12.5507	12.6461	12.3936	11.9261	12.863	11.2421	14.0269	13.0025	13.3923	12.7472	12.4106	11.4322	12.7076	12.1028	13.642	13.177	12.6369	13.812	13.1062	13.3028	12.6471	13.776	13.4805
TUBB1	not-sig	not-sig	#N/A	#N/A	#N/A	#N/A	NA	11.568	13.8742	14.6651	14.2158	13.91	13.9067	11.7771	15.002	13.7497	13.6773	14.6888	12.66	15.3141	14.9884	13.8368	13.3708	14.8876	15.7773	14.5048	14.6033	14.0791	16.3954	13.7283	12.9958	15.161	14.1619	15.9062	14.5874	13.9365	12.9295	12.777	13.8133	17.7658	14.3204	15.1474	13.9987	14.2154	15.3628	13.548	13.334	13.7495	14.7943
RB1	not-sig	not-sig	#N/A	#N/A	#N/A	#N/A	NA	14.4603	12.8515	14.3951	13.3853	14.7019	14.2098	13.5142	13.8339	14.1871	13.964	13.9928	14.1188	9.10608	13.5536	14.1156	14.458	13.8362	14.1292	14.3091	13.8332	13.9702	15.2016	13.766	14.0326	14.2593	13.9075	14.3624	13.9471	14.1172	13.6967	14.0777	13.869	14.6036	14.0633	13.8369	14.3668	13.5535	13.8373	14.7411	13.9133	13.8134	13.2232
PPP2R5C	not-sig	not-sig	#N/A	#N/A	#N/A	#N/A	NA	13.1054	12.9095	13.7025	13.1287	12.8042	13.7509	13.604	13.7977	13.5053	13.2427	12.7286	13.4386	13.9974	13.4462	13.3589	13.3494	12.8656	14.2194	13.6285	13.0369	13.1104	13.6124	13.6929	13.5407	13.6014	13.3872	12.928	13.4054	13.682	13.3407	13.4874	13.6085	13.2775	12.9088	12.8981	14.0134	11.8911	13.5702	13.3952	13.0379	12.593	13.6759
RAP1B	not-sig	not-sig	#N/A	#N/A	#N/A	#N/A	NA	17.3832	16.7716	17.0546	17.1121	17.5123	16.5559	17.8514	17.4961	17.2394	16.8909	16.7878	17.1891	16.8027	16.9148	16.8728	17.0744	17.0623	17.9826	17.1381	16.7833	16.859	17.7695	17.1133	17.3947	16.5842	17.1386	16.3698	17.3258	17.0249	17.137	16.9793	17.0951	16.3542	17.0289	17.0939	16.5731	16.517	17.04	17.3513	17.562	17.9773	17.4828
PCBP3	not-sig	not-sig	#N/A	#N/A	#N/A	#N/A	NA	13.0525	13.7697	13.9668	13.6443	10.1278	13.7068	11.6343	13.9701	11.7334	12.9913	13.4707	11.5098	14.1293	13.7898	13.8213	14.1541	12.631	12.4406	13.2404	13.9158	13.231	12.1528	11.9261	12.7801	14.092	13.5324	13.775	13.7219	13.9922	11.0004	12.4707	13.2881	12.5268	13.9962	13.2067	14.0636	10.6483	12.9129	13.3923	14.0894	11.4911	12.7359
CDK12	not-sig	not-sig	#N/A	#N/A	#N/A	#N/A	NA	12.9099	12.2257	13.496	12.8463	12.2108	13.1369	14.4784	14.0623	13.3472	14.2188	11.923	12.4805	12.9734	13.2704	12.4685	12.0643	12.8858	11.8311	12.586	13.1294	12.9914	12.7588	12.0336	12.8983	13.5244	12.4699	12.9554	13.0803	11.9662	12.8253	13.1999	12.3379	11.573	12.5254	13.1062	12.102	13.0453	10.5302	12.4159	13.2905	11.2741	12.6236
NDC1	not-sig	not-sig	#N/A	#N/A	#N/A	#N/A	NA	13.2706	13.1044	13.8986	14.1825	13.4287	13.6214	13.4378	13.8159	13.7538	12.7798	13.4093	13.7925	12.5847	13.229	13.4202	13.9491	13.844	13.4328	13.6147	14.1341	13.8582	14.8901	13.2028	13.1125	13.7254	13.2282	8.42478	13.3793	13.8653	14.1875	13.5102	14.0338	13.2035	13.4678	13.0742	13.8244	13.3046	14.7348	14.1131	14.2766	12.6526	12.6045
ATP2A2	not-sig	not-sig	#N/A	#N/A	#N/A	#N/A	NA	17.5993	17.1932	17.4699	17.2218	16.0319	17.2468	16.9191	16.9782	17.3672	17.6504	17.3701	17.8621	17.5522	17.6553	17.3418	17.6117	17.543	16.3195	17.0298	17.2786	16.8948	16.9785	18.0596	17.4856	17.4146	17.5888	16.7925	17.2834	17.5419	16.985	17.3059	17.0889	17.0832	17.6742	17.9895	17.1497	17.0483	16.8879	17.5207	18.0151	17.0756	17.4251
YES1	not-sig	not-sig	#N/A	#N/A	#N/A	#N/A	NA	13.2399	12.6099	13.2239	13.4676	13.9561	12.9892	12.6711	13.7954	13.272	12.8919	12.9525	13.6944	11.0986	13.2702	13.9211	13.8137	13.2738	12.8988	13.2408	13.248	14.0035	13.6549	13.8481	14.371	12.2656	13.8236	13.581	13.7109	13.3937	14.0679	13.7892	13.8452	12.6379	12.2083	13.7073	12.5397	12.5197	13.4308	13.9062	12.1072	13.9447	13.3734
NAA25	not-sig	not-sig	#N/A	#N/A	#N/A	#N/A	NA	15.4995	14.6435	15.6981	15.496	14.8769	15.6584	13.1643	14.9408	15.6367	14.9685	14.8174	14.5432	15.9053	15.1561	15.8178	15.2614	15.5558	13.6303	14.6078	15.7179	15.4731	13.5581	14.1074	13.3673	14.3167	15.8873	15.8044	15.702	15.5772	15.3523	15.0587	14.1753	14.5422	14.6183	14.5451	15.6622	13.4716	13.9484	15.3999	14.386	15.0063	15.1885
TDP2	2	METAB	#N/A	#N/A	#N/A	#N/A	NA	11.8978	14.2366	13.7253	13.1178	12.5339	13.8766	13.0035	13.0237	12.5932	13.3028	13.538	12.776	12.9273	13.6087	13.4732	14.1367	14.1374	11.4917	13.232	13.6343	14.2872	12.3611	14.5952	13.6752	13.7229	15.5691	14.6294	13.2403	13.9471	12.6937	13.4146	13.3724	12.6871	14.2656	13.4266	14.3124	13.1245	14.1725	13.4829	15.2824	14.4117	13.9196
DLG3	not-sig	not-sig	#N/A	#N/A	#N/A	#N/A	NA	11.6737	12.6697	12.1412	12.2334	12.8745	10.6801	12.7078	11.9377	12.2536	11.521	12.0591	12.117	11.8452	11.8021	12.1712	12.1731	12.346	11.5024	12.1771	12.1213	11.8651	11.7554	12.0153	12.3954	12.0479	12.3126	13.2887	11.8559	12.2173	12.9158	11.5806	12.017	12.3508	11.7117	11.0864	12.1879	4.72684	12.6637	12.0704	12.1536	12.576	12.1062
NUDCD3	not-sig	not-sig	#N/A	#N/A	#N/A	#N/A	NA	13.3742	12.7148	12.5558	12.8466	11.2445	12.876	13.6192	10.364	12.7353	13.0083	12.9875	12.0805	12.5283	12.9536	13.5609	12.4994	13.2985	12.6346	13.0061	12.6088	12.841	11.7223	12.4446	11.8447	12.2613	13.1027	13.8199	13.0288	12.5188	12.6955	12.632	12.8423	12.4132	12.5814	10.2687	12.5501	12.0073	11.8031	12.2654	12.9543	11.5802	12.4481
MVB12A	not-sig	not-sig	#N/A	#N/A	#N/A	#N/A	NA	14.4388	14.002	13.8702	13.1488	13.0337	13.76	12.711	14.7158	13.8618	15.4786	14.8995	13.7517	14.2533	14.7026	13.8547	14.0852	13.0779	14.8337	14.1161	13.6676	13.3408	13.6014	12.9236	15.1146	14.2005	15.2754	12.7135	13.1961	14.2442	14.297	14.1779	13.1176	14.6564	14.6035	15.5644	12.9887	13.8582	16.1614	13.0683	13.228	14.7563	13.1273
INPP5K	not-sig	not-sig	#N/A	#N/A	#N/A	#N/A	NA	11.6433	12.2348	11.2392	12.3806	12.3038	11.7814	13.2635	13.9035	12.8039	12.3621	11.9448	12.464	12.9262	13.3402	11.9783	11.8343	12.5357	12.2448	13.3038	12.0836	11.9098	13.3126	11.4264	11.967	11.4174	11.5571	12.3804	11.6895	11.8339	10.8531	11.9652	13.084	12.5691	12.0451	11.5891	11.0498	12.7739	11.98	12.8344	12.5523	13.9053	13.1721
HNRNPR	not-sig	not-sig	#N/A	#N/A	#N/A	#N/A	NA	16.5715	16.4666	16.2226	16.4044	16.2819	16.4369	16.4494	16.459	16.2	16.4977	16.5293	15.8989	16.6911	16.2008	15.8795	16.3627	15.9381	15.829	16.0902	16.3635	16.4682	15.6293	15.6328	15.9456	16.7452	16.4155	16.3036	16.1581	16.1737	15.895	16.1492	16.1884	16.4767	15.7803	15.7576	16.7714	16.5566	16.2371	16.1161	16.6724	15.9351	16.1908
CHD1	not-sig	not-sig	#N/A	#N/A	#N/A	#N/A	NA	12.7037	12.5866	12.5118	12.0972	12.2783	11.5357	13.0953	12.2314	12.7877	13.1258	12.8443	12.6683	12.7816	12.8033	13.1929	12.7829	12.5079	12.9887	13.0888	12.9161	13.2922	12.8976	12.5793	12.8214	13.0491	12.6743	8.00192	12.8284	12.7777	12.5415	12.7622	12.6279	12.7946	12.7815	12.8417	13.2613	13.383	12.727	12.8897	12.4304	12.4459	12.0736
PCCA	not-sig	not-sig	#N/A	#N/A	#N/A	#N/A	NA	13.5007	15.7002	15.1542	16.2503	15.2891	15.896	14.1863	16.2009	15.1664	15.1465	15.6136	14.1876	15.0981	15.9374	13.5702	15.7052	13.9353	14.7093	13.4368	14.7648	14.4912	13.7238	15.274	13.631	14.4837	13.8482	14.4603	14.4173	13.8421	15.0779	15.0296	13.9798	15.4719	13.8864	15.2094	12.5013	15.0734	13.8174	15.7333	16.3462	13.7778	14.1083
NUDT4	not-sig	not-sig	#N/A	#N/A	#N/A	#N/A	NA	13.0088	11.6754	13.1234	11.5592	12.4769	12.4976	11.1828	12.2827	12.8081	12.3801	12.7654	12.8364	11.9445	12.6254	12.79	11.9855	11.2996	11.6915	12.8521	11.3881	13.0294	11.5967	12.2769	10.5215	11.7313	13.1878	10.4045	9.75086	11.0391	11.5064	12.7239	11.6162	11.7845	13.1872	13.0606	12.0806	12.5721	4.15248	13.0634	11.1673	12.078	10.2657
EIF3F	not-sig	not-sig	#N/A	#N/A	#N/A	#N/A	NA	15.0504	15.2568	15.659	15.7252	15.0342	15.6518	15.5471	15.2614	15.8031	15.3223	15.6296	16.0344	15.4159	15.8773	15.6544	15.553	16.1695	14.4813	16.2191	15.6909	15.6802	15.5111	15.6189	15.7813	15.9053	15.778	15.6262	15.4694	15.8152	15.3697	15.7306	15.281	14.0681	15.3524	15.9986	15.6509	15.7216	15.5391	15.4918	15.2292	15.5396	15.3389
IST1	not-sig	not-sig	#N/A	#N/A	#N/A	#N/A	NA	14.5825	14.1737	13.8799	14.1483	14.35	13.8259	16.8426	13.6801	13.979	14.3422	13.9146	14.0774	12.5061	14.1729	13.9058	13.9021	13.7729	13.6479	13.9887	14.149	14.1502	13.4722	13.9895	13.8197	13.1691	14.2991	13.8403	14.0004	13.5755	14.1943	13.9095	13.8527	13.553	13.9221	14.3032	13.862	12.9938	13.4652	13.9598	13.6799	13.837	13.9573
KRR1	not-sig	not-sig	#N/A	#N/A	#N/A	#N/A	NA	12.6889	13.4795	12.3823	12.2553	13.1247	13.6841	14.3974	12.5802	13.1789	13.3853	12.9743	12.5932	11.4975	12.3515	13.0778	12.7138	12.2382	10.9895	13.2746	12.3061	13.1011	12.8295	12.6131	13.0043	12.8617	12.513	13.8105	12.9533	12.4671	12.8159	12.7139	11.6421	14.8388	13.045	14.1668	13.0705	12.8496	12.7026	13.1462	12.3966	13.5357	12.0543
DBT	2	METAB	#N/A	#N/A	#N/A	#N/A	NA	13.4377	14.1699	13.9712	13.4732	14.851	13.5868	14.2486	12.2092	12.6255	13.6989	13.3803	13.1107	13.5766	12.5353	12.9538	13.7948	12.9082	13.9468	12.1977	13.0799	12.1673	11.2363	14.3141	13.2924	12.7985	13.9431	13.2263	13.2692	12.566	14.1689	12.6107	12.1589	15.941	12.0633	12.5822	12.9816	12.5553	13.1599	12.288	11.2567	12.3958	12.7671
VDAC1	2	METAB	#N/A	#N/A	#N/A	#N/A	NA	18.3894	17.8514	16.7541	17.6178	17.6924	18.1067	17.6919	17.0544	17.3845	17.6047	16.9677	16.9213	17.224	17.3935	17.3079	17.9469	16.9712	17.6405	17.2126	17.6609	17.2284	16.648	17.0053	16.8833	17.2623	17.0163	17.0989	16.4704	16.7976	17.5181	17.4142	16.8999	18.4962	16.9896	17.6262	17.1031	17.7385	17.0575	16.9515	17.679	16.5372	16.4766
NMI	not-sig	not-sig	#N/A	#N/A	#N/A	#N/A	NA	13.9816	13.9479	13.6839	14.078	12.6955	13.625	11.4605	13.4134	13.188	13.3939	13.2418	13.7189	12.3858	13.2827	14.0794	13.3922	13.9757	14.5218	13.5634	13.3511	11.4021	13.8285	13.9611	13.6919	12.9885	13.6159	13.359	14.2361	13.9099	14.0001	13.6761	13.8107	12.8086	13.7109	13.9934	13.5264	13.4913	14.0576	13.9467	13.1977	13.5095	14.0369
ARID3A	not-sig	not-sig	#N/A	#N/A	#N/A	#N/A	NA	15.7675	13.3544	14.3637	14.3932	12.7219	13.4995	12.3534	15.6897	13.2502	14.8628	14.3099	14.4614	16.9154	15.3396	12.6763	12.7666	13.8729	14.8581	13.6322	14.1794	13.3057	15.5956	14.5533	13.9876	14.2148	14.2038	13.7089	12.1247	15.1522	15.6046	13.2234	15.6064	12.8385	13.6001	13.0161	15.162	14.3419	13.7766	16.1393	15.6599	9.84072	15.1236
MAOA	not-sig	not-sig	#N/A	#N/A	#N/A	#N/A	NA	15.8986	14.3371	13.7577	14.1913	15.8012	15.6615	17.8469	13.8503	13.5959	14.1463	13.8999	15.0814	14.5303	14.7919	14.1903	15.5403	14.1796	13.8873	13.1647	14.1803	13.3163	11.9007	14.7532	15.0473	13.7457	14.309	14.1456	14.5872	14.3616	14.7868	14.7884	15.1383	15.3283	13.675	14.2385	13.6403	13.8466	14.0992	14.5398	14.2358	14.9151	14.4983
PPCS	not-sig	not-sig	#N/A	#N/A	#N/A	#N/A	NA	14.2406	14.5747	13.9884	14.1002	14.531	13.7692	17.4682	14.314	14.0934	14.3976	14.1382	14.12	14.1654	14.0034	14.6087	14.2925	13.9742	14.2052	14.3578	13.8152	13.9758	14.0672	14.108	14.2917	14.1305	13.1866	12.4922	13.7378	14.3336	13.8039	13.4508	13.9833	11.768	13.8002	13.9813	14.1101	14.1401	14.1044	14.1502	13.7864	13.5305	13.4417
RBM10	not-sig	not-sig	#N/A	#N/A	#N/A	#N/A	NA	13.2794	13.4531	14.0464	13.4845	12.9492	13.521	13.6079	13.2572	13.4374	14.9395	14.0334	14.1305	13.5216	13.5896	13.5321	13.6722	13.3957	15.7514	14.0544	13.51	13.7704	13.3391	13.8948	13.856	14.3996	14.2364	12.2788	13.7255	13.7798	13.6437	13.9791	13.911	12.8336	14.1924	13.9527	13.3729	14.3864	13.6929	13.525	13.9082	13.944	15.1013
PPP2R1A	not-sig	not-sig	#N/A	#N/A	#N/A	#N/A	NA	15.8933	16.3245	15.9012	15.6487	16.3799	15.8547	15.8757	15.8297	15.949	16.2766	15.9029	15.9772	16.364	15.7138	16.1011	15.9973	15.9574	16.8507	16.3042	16.1437	16.0573	15.939	16.1319	16.0271	16.0996	16.195	16.2737	15.7857	16.0973	15.428	15.6797	15.6402	16.2494	15.8323	16.126	16.0859	15.7545	16.2082	15.792	15.5614	15.7871	15.5288
WASH6P	not-sig	not-sig	#N/A	#N/A	#N/A	#N/A	NA	13.4907	13.95	13.0832	14.0733	13.8181	13.0377	12.2013	13.793	13.7741	12.6057	14.0917	13.9005	12.4957	12.2867	13.5154	11.0884	12.2368	13.2513	11.6744	11.5724	13.2135	10.7039	13.6562	11.4549	11.9001	12.8742	12.503	11.9508	12.8753	13.6221	13.5584	12.4352	13.0788	11.9196	13.1534	13.4638	12.5344	12.706	13.0696	13.774	13.2343	14.2662
PLIN4	not-sig	not-sig	#N/A	#N/A	#N/A	#N/A	YES	15.003	11.9821	13.3024	14.1261	15.0225	11.9664	14.3087	12.2835	14.1224	12.2253	14.4557	12.3636	15.3279	13.4972	12.824	11.9932	14.3788	12.4334	15.3309	12.5865	13.1975	13.2911	11.2807	13.5073	14.7486	14.4955	13.3723	13.9132	13.3052	13.8889	14.2205	13.343	12.9032	13.1204	15.3505	12.1468	13.144	12.3528	13.015	12.4809	13.6666	14.0723
[truncated: 3,954 more rows]
[truncated: 314 more columns]
