# Supplementary material for: Proteomics of colorectal tumors identifies the role of CAVIN1 in tumor formation and progression
Source: Research Square preprint supplement (doi:10.21203/rs.3.rs-3817695/v1), 2024-01-11
Supplement: Supplementary file 2 [file 582456b5a5afd3a8519e7a0b.xlsx]

## Sheet: prot_combat_2_merged
	X1_1st	X1_2nd	X10_1st	X100_1st	X101_1st	X102_1st	X103_1st	X104_1st	X104_2nd	X105_1st	X106_1st	X106_2nd	X107_1st	X108_1st	X109_1st	X109_2nd	X11_1st	X110_1st	X112_1st	X112_2nd	X113_1st	X114_1st	X115_1st	X116_1st	X117_1st	X118_1st	X118_2nd	X119_1st	X12_1st	X120_1st	X121_1st	X122_1st	X123_1st	X124_1st	X125_1st	X125_2nd	X126_1st	X127_1st	X127_2nd	X128_1st	X129_1st	X129_2nd	X13_1st	X130_1st	X131_1st	X132_1st	X132_2nd	X133_1st	X134_1st
IGKV3-7	17.0681	19.1449	17.4803	17.9975	17.0416	17.4793	17.6055	18.4028	17.6229	17.5346	17.475	16.9914	16.5366	17.7005	18.4415	17.3227	16.0366	18.707	18.8607	15.7696	17.1622	18.7101	18.1436	18.1382	17.9206	18.1893	15.4888	18.0226	17.4353	18.673	17.6423	17.6766	17.081	17.4061	17.6256	17.0313	17.3085	17.9775	13.9126	18.7115	15.3322	16.7693	18.5685	15.5784	15.6561	18.0543	18.772	18.9559	17.3763
IGLV3-9	12.0105	14.28	13.3097	14.2445	12.7638	12.8058	14.0858	14.0468	13.6725	13.3073	12.666	13.5736	13.4064	13.3201	14.5001	13.2904	11.7562	14.595	13.925	13.1244	11.862	15.345	14.1663	14.1734	13.9157	14.4257	12.0948	12.8247	12.6913	15.3595	14.3229	14.1963	12.8764	12.928	12.6298	13.4859	12.8452	14.8451	11.0577	14.9568	12.1233	12.8207	14.6587	12.0571	12.2956	16.0276	14.5779	14.7101	12.6825
IGHV3OR16-12	12.2455	14.2824	10.084	13.8907	11.0824	13.4702	13.7505	14.4096	13.8533	13.3071	12.5842	13.7015	12.5051	12.6217	14.0682	12.4758	12.2203	13.7355	12.8292	13.1417	11.2997	13.0789	13.0804	13.6951	11.5861	12.2733	12.3893	12.6324	12.3037	14.0542	11.7765	13.2167	11.9979	12.6338	14.0508	11.357	12.4809	14.0531	12.6398	13.6056	13.1471	12.2474	12.6958	12.2759	12.3381	14.1328	13.6485	14.5063	12.8007
IGKV2-40	13.1306	13.7518	11.2395	13.2974	12.9626	12.5456	14.6839	12.7396	12.7574	11.616	11.6041	13.2133	14.4873	12.3584	12.0537	12.019	13.1413	12.1957	11.9885	11.8608	12.3961	12.601	11.9387	12.8645	11.9136	13.7441	11.9346	12.4161	12.4463	15.1755	11.3349	11.4622	12.3541	12.3179	13.0512	12.2234	12.7632	13.5996	7.40086	13.9003	12.9159	12.6849	11.6629	13.4663	13.1244	13.7211	12.7608	12.5119	11.6193
IGKV3D-11	15.4589	17.7959	16.2514	17.117	15.8606	16.6103	16.9479	17.545	16.7877	16.3896	16.3026	16.1901	15.7089	16.6268	17.1841	16.2841	14.2556	16.6776	16.7133	15.4356	15.6747	17.7238	16.916	18.1836	16.9242	16.8085	14.9439	16.7458	15.9574	17.5934	16.5197	16.4477	16.4909	16.384	16.3984	16.4441	16.5036	17.4387	12.8717	17.549	14.3296	16.0398	15.8764	14.845	14.7634	17.1268	16.2961	17.1429	16.1061
IGHV3-49	12.8803	14.0343	13.4911	13.4167	15.2488	14.0142	13.1304	15.2852	14.9007	13.4107	13.1411	13.2916	15.6247	13.5124	14.4856	14.1303	17.5044	14.2668	14.8871	14.1703	13.888	14.4049	14.5384	14.9532	14.2495	13.3975	13.3886	14.2571	15.5584	15.4013	16.1604	13.8957	13.9454	13.7201	13.4923	14.2504	13.4809	16.1182	9.41279	15.0813	14.9613	13.0959	14.8632	10.8038	14.3726	15.1635	14.914	15.8666	13.9042
IGHV3OR16-9	13.9369	16.6725	14.9045	16.4254	16.2743	15.5121	15.9405	16.5603	16.1088	16.0214	15.4367	16.1529	16.3873	15.078	15.8464	14.8918	17.2232	15.7626	15.9753	14.4019	15.2821	15.9918	14.9937	16.1823	15.5097	15.337	14.7433	15.5621	15.8286	16.9313	15.851	14.362	15.5816	14.5699	14.6471	15.5079	14.9569	16.6107	13.7795	16.1226	15.7201	16.3492	16.6154	16.3611	16.1466	17.165	15.3266	15.1184	15.1611
GATD3B	11.6211	11.9403	12.8991	12.6744	12.0858	13.7268	11.9227	11.7434	13.8639	13.1531	12.7848	13.9354	12.5397	11.6742	12.324	13.0935	13.3533	13.8349	12.9316	13.4143	13.4428	12.436	12.6328	12.8698	12.4926	12.7879	12.442	12.1548	13.9748	11.8611	12.3615	13.1832	12.9007	13.3066	12.8273	12.1202	13.5281	14.9968	9.34681	14.6006	13.9391	13.1555	11.859	12.9572	12.7803	13.4035	13.4101	12.3886	12.9391
LOC102724159	14.6862	14.6035	15.1129	15.0719	15.316	15.1095	14.9838	15.2363	14.3333	15.3142	15.7875	14.8622	15.5177	14.9859	15.2236	15.3096	14.424	14.8209	14.6193	14.5184	15.4575	15.0531	14.234	14.6878	15.0076	15.2667	14.3305	15.3845	15.6088	14.6004	15.4389	15.1728	14.9808	15.4018	15.5881	15.6419	15.9542	14.4391	16.9264	14.6873	15.3975	14.5682	14.99	14.3979	15.2136	13.5999	14.6432	14.0701	14.6343
IGHV5-51	13.357	14.1595	12.7095	14.1922	14.3416	13.7283	13.6307	14.7028	14.7626	12.469	12.8511	14.1043	14.656	13.2245	14.1613	13.5427	13.2381	13.5952	13.9111	13.621	11.3608	14.7862	13.3628	13.97	14.284	13.6506	13.8953	13.4066	12.8579	14.7469	13.8335	13.027	13.381	12.9198	13.4669	14.1093	12.9679	13.822	11.3754	13.753	14.1795	13.8424	14.0902	13.5279	13.7465	15.8261	14.9607	14.6815	12.8415
HNRNPCL4	14.5611	14.2552	14.0242	15.7713	14.9868	14.844	14.5595	13.3147	14.5382	14.2138	14.0919	14.9141	15.4881	14.5095	15.2078	14.3884	14.4295	15.0107	14.431	14.6532	14.9509	14.2527	14.8746	15.3162	14.4801	15.1218	14.4288	14.9562	14.7643	15.2108	14.766	14.6545	14.0285	14.0797	14.1794	14.6491	13.516	11.637	16.9391	13.0537	15.5788	15.5189	15.1246	15.2272	15.3559	14.9564	13.7181	13.7908	14.1799
ARHGEF5	14.8932	13.9826	13.5644	13.2459	13.9593	13.9351	13.5842	13.1441	13.6762	14.0647	13.876	12.8037	13.7056	13.7214	13.3128	11.5873	13.543	13.0933	13.929	13.8478	13.5579	13.7566	14.1532	13.8763	13.6668	13.6356	13.3925	13.4811	13.2627	12.7164	13.5435	12.9984	13.8833	14.6167	13.6289	13.421	13.8383	13.4158	10.0422	13.1915	12.1612	13.2382	13.6109	13.7418	13.8733	12.9794	13.5859	14.2713	13.7947
RBM47	13.4409	14.3864	14.1551	14.6961	13.9311	14.1111	13.8279	13.9144	13.9668	14.3238	14.3905	14.0615	14.3536	13.6193	13.9786	13.985	13.9887	14.4524	13.1713	13.7788	14.111	13.6917	14.207	13.9227	14.2246	13.558	14.4075	13.3078	13.7669	12.9909	14.0129	13.9937	13.4269	13.4063	13.792	13.9678	14.1535	12.8412	12.8028	13.3763	14.8672	14.5303	14.2123	13.9159	14.3158	13.3461	13.2685	14.1547	14.3697
UBA6	14.3726	13.4703	14.1143	13.6247	13.7527	13.7802	13.9937	14.2012	13.8464	13.8414	13.5568	12.9986	13.9298	13.6056	13.495	13.807	13.6929	13.6784	13.6881	13.2643	13.6143	13.9469	13.6942	13.6821	13.5335	13.4871	13.7786	13.5809	14.0568	13.613	13.1921	13.2717	13.8976	14.3806	13.1029	14.6358	13.4017	12.6756	13.9452	13.0643	14.4429	13.8986	13.6616	13.5905	13.9417	13.3296	13.1564	13.2666	14.2248
ESYT2	15.3014	15.2305	14.2082	14.5493	14.6367	14.9283	15.0705	14.5337	14.0332	14.9317	14.377	14.1371	14.8305	14.8066	13.9373	16.8038	14.5203	14.2153	15.0427	14.5836	14.2349	14.6999	14.6836	14.7704	14.5209	13.8704	14.7724	14.5544	16.9006	14.5949	14.4733	16.4682	15.5885	15.1176	14.4838	14.0566	14.1907	14.5615	14.1264	14.4775	14.6156	16.8771	14.6079	15.7678	14.8643	14.8815	14.3225	14.4358	14.378
SHTN1	14.0404	12.7369	13.3969	13.5343	13.2536	13.9405	13.3606	13.5163	13.5466	14.1386	13.1982	13.435	12.252	13.1613	13.9789	13.6213	13.3703	14.5696	14.0396	12.3152	13.9118	13.5607	13.8068	14.3653	13.2854	13.7946	13.3406	13.4939	14.1185	14.0821	13.3389	14.269	13.588	13.3581	13.568	13.6743	13.773	14.0142	14.1228	13.5058	12.4485	13.9121	13.627	14.159	14.6461	13.8666	13.611	14.1862	13.4865
ANO9	14.1682	13.0181	14.5629	13.9677	12.4133	13.551	14.7279	12.4183	11.3681	13.9236	13.2035	13.3356	11.9537	14.0476	14.5801	13.2001	11.2572	13.1253	13.2217	12.8277	13.3502	13.1966	12.6575	13.4229	13.5671	12.4002	13.4564	14.1158	13.7592	14.6201	14.2081	14.0889	13.3707	13.304	12.8739	12.3341	12.7717	13.872	16.529	14.3455	12.211	13.6864	13.4337	12.6808	11.6279	15.3194	12.0374	13.0193	13.729
BICDL2	16.1455	15.8483	14.2641	17.1561	15.6298	15.665	16.5893	16.0306	16.324	16.7316	16.0458	13.3162	16.586	14.8427	16.4998	15.4056	15.3967	16.0678	16.0719	16.0144	15.2459	16.9566	15.8642	15.8604	16.6265	15.517	15.3947	16.7664	15.917	16.6728	15.924	14.5491	16.8024	15.6135	15.9446	16.4135	15.8291	17.8987	8.73896	13.2759	15.1522	15.1829	13.4922	14.2874	15.7115	18.921	15.6425	14.5499	15.1223
ILVBL	12.9145	13.7548	13.957	14.1918	13.4252	13.9571	13.824	13.515	13.7842	13.7393	13.884	13.4819	14.3661	13.7969	13.6485	13.5563	14.9596	14.3974	13.5697	13.9782	13.9815	13.3404	13.4392	13.7263	13.5879	13.854	14.4668	13.2117	13.5555	13.8833	13.5329	14.3157	13.5124	13.4557	13.5527	13.8415	14.4917	13.4868	14.6773	10.429	14.1968	13.6276	13.4343	14.1533	14.8256	13.484	14.0841	14.2561	13.3889
PLEKHG3	13.2724	12.3037	13.4568	11.8299	12.8824	13.4934	14.0352	11.9714	13.411	12.6532	13.0601	12.9349	12.1293	12.5041	13.5239	11.7412	12.2775	12.4196	13.8583	12.9648	13.6345	13.4697	13.6754	13.6749	12.2069	13.3085	13.1481	12.2178	12.7457	14.1354	13.212	11.4573	14.0945	13.3131	12.9797	12.7169	13.3873	11.8014	12.6037	12.1107	12.5844	12.1646	13.8373	12.2348	13.1292	12.1425	13.7318	12.4737	13.3269
SH3PXD2B	14.5929	14.0712	14.025	12.9531	12.9629	14.0169	14.5265	14.7231	14.1202	13.0428	13.1978	13.8303	12.5946	14.2947	14.3828	14.0402	13.751	14.4509	14.6097	14.2701	13.6145	13.6505	14.0684	13.9168	14.3879	14.1827	13.7902	14.5036	14.125	15.2032	14.4599	14.4151	14.3074	14.511	14.6798	13.9271	13.2707	13.8074	9.58946	12.012	13.2624	14.373	13.9905	13.2074	13.7198	13.7912	14.5292	13.889	14.3171
NBAS	14.0971	14.045	13.622	12.8678	13.9439	14.0936	13.4623	13.5353	13.5633	13.5466	13.8696	13.3665	13.9931	13.7117	13.6119	13.8411	14.1028	13.2359	13.9268	13.1953	13.9798	13.76	13.9417	14.0831	13.5969	14.057	13.3973	13.6606	14.0121	14.5318	13.6081	13.6577	13.2696	14.0923	13.3751	13.9898	13.8483	13.991	14.1603	13.456	13.8188	13.2955	14.1338	14.1923	13.4773	13.1267	14.2092	13.692	13.6904
VWA8	13.9725	14.4928	13.8705	13.9255	13.8168	13.4638	12.4239	13.0182	12.8413	14.2223	14.0175	13.2569	13.685	12.4746	13.0575	12.863	13.9941	14.2338	13.8645	14.0173	13.5921	13.5797	14.1235	13.0635	12.993	13.4731	13.132	13.7645	14.2526	13.6128	13.2484	13.7932	13.7225	12.5579	14.2139	14.8017	14.8163	12.8595	17.6635	13.408	13.4277	12.8255	12.7761	14.1144	12.62	14.4173	14.3137	14.1029	13.2014
SBNO1	12.3502	13.7341	14.0415	13.0865	13.9973	13.0463	13.242	14.1637	12.7391	12.4551	13.963	13.9939	13.5669	14.0923	13.6625	13.6386	13.5332	13.6824	12.6291	13.9656	13.2909	13.826	13.0643	12.936	13.4172	13.5068	13.8443	13.5391	13.0519	12.2566	13.453	13.5185	14.1516	12.2993	12.9413	13.3184	13.3029	13.26	15.623	12.5781	14.3943	13.9688	13.674	13.311	13.4284	13.8388	14.1918	14.2004	13.9423
GTPBP10	11.8706	13.5665	14.2064	15.0211	16.2809	14.3552	17.4282	13.974	16.2946	16.1159	15.0543	14.5406	14.6698	15.9691	14.639	16.1049	14.6232	14.7458	15.4196	16.058	14.2001	14.8335	15.1183	12.7936	13.9548	14.5807	14.9823	14.6811	15.3125	13.6852	14.3058	15.6052	13.1844	14.077	14.9895	14.5194	14.4789	12.4299	13.9286	13.6214	15.6285	15.1372	13.9587	14.1269	14.3988	17.3022	15.4471	14.7947	14.6994
WDR91	14.0346	13.3383	13.2257	13.1419	14.0501	13.6172	13.1047	14.1033	13.1129	13.9927	12.9709	12.9596	12.9091	13.5102	13.0986	13.0596	12.1393	12.6611	13.8132	13.9183	14.0049	14.0761	13.7059	14.0372	13.6261	13.4838	13.8197	13.3955	13.3368	14.1114	13.8126	13.8167	12.5554	13.307	13.4899	13.3336	12.9817	13.1112	11.4595	13.8283	12.285	13.4862	13.5753	12.6327	12.4365	14.0563	14.1187	12.9423	13.5928
DENND11	14.3589	13.0025	13.1924	11.2811	13.3798	14.1133	12.6985	12.4367	12.8173	13.9887	13.7741	13.3026	14.1918	14.0548	11.7499	12.8871	13.226	13.6797	13.7864	12.8058	14.244	13.884	13.7915	13.708	12.8102	13.6778	14.1371	13.9879	13.6173	11.6402	13.9872	11.5803	13.9776	13.4505	13.633	13.8044	13.4369	13.8543	8.97821	12.5714	12.0101	13.1671	13.6949	13.6913	12.1936	11.6352	12.9889	13.8283	12.9319
POTEF	14.3478	15.1467	13.67	14.5253	13.2129	15.075	15.8597	14.8331	11.4365	15.4671	13.8199	14.6248	15.7227	12.7818	14.9934	15.1366	13.1503	13.5989	14.5155	15.9805	13.7407	13.3534	13.6894	14.0114	14.3879	13.5675	14.2623	14.2391	13.9158	13.7449	13.9764	13.9981	16.3278	15.142	15.1054	14.5046	15.0727	16.204	12.9847	12.9096	14.9009	13.7791	13.0898	14.5934	15.0466	16.0005	14.1561	13.7138	13.4491
CNOT1	14.6194	14.3076	14.5453	14.2573	14.521	14.4352	14.3668	14.2319	14.4589	14.2585	14.4254	14.4394	15.1866	14.1696	14.5981	14.7363	14.8596	14.3547	14.1609	13.7664	14.4015	14.1661	14.1439	14.1802	14.5644	14.6626	14.5907	14.6537	14.174	14.0727	14.6474	14.2338	14.612	14.3818	14.3405	14.7579	14.2794	14.1899	16.357	14.7143	15.0654	13.9919	14.3626	14.7558	14.7552	14.0524	13.9917	14.8889	14.4831
CCDC88B	11.737	12.7319	12.5835	13.7445	12.2391	13.7031	12.8348	13.3027	13.311	13.7287	12.4312	12.6218	11.5803	13.0297	11.6445	13.1806	12.5001	12.2078	12.6301	13.2379	13.3348	12.1775	14.1534	12.9209	12.7876	13.2323	13.8512	15.7246	12.5655	12.7218	13.9836	13.5329	13.3269	13.9047	14.0209	12.9535	12.9098	14.6215	12.7277	12.2346	11.8965	11.6876	12.8154	11.4421	11.1782	11.5979	12.9016	11.9183	11.0812
MAP1LC3B2	12.7536	11.6391	13.0494	10.0444	13.1657	11.0515	11.7994	12.4827	13.957	11.1493	11.5851	12.4679	10.8135	11.4303	11.0331	11.9299	12.6599	11.2821	12.7612	12.7854	10.2822	12.3058	11.3	10.8994	11.7641	11.4771	12.9466	11.7137	11.7625	11.5777	11.3338	11.2234	11.1283	10.9384	9.90463	10.8054	10.8926	12.9993	10.8095	11.7384	10.2042	11.5107	11.5779	11.7922	11.3678	11.402	11.4543	11.536	12.3841
PGP	13.2997	14.061	12.7732	13.757	12.7421	13.7122	13.8285	13.7562	13.3749	13.4575	13.3392	13.9223	13.2165	11.6771	12.5092	12.9729	13.3089	13.4465	12.9234	12.8833	13.6249	12.7169	13.0699	11.5651	13.0029	12.2398	13.669	13.4351	12.6822	14.5401	13.2048	10.5502	13.2639	13.8252	13.4236	12.2047	13.406	11.0179	15.1838	10.3087	13.6058	13.7086	13.0694	13.6666	13.0099	14.8089	12.652	12.6274	11.7124
RIMOC1	12.3031	11.8415	12.7934	12.9085	13.1734	12.4062	12.3992	13.1529	12.3679	12.293	12.2135	11.9162	12.4795	12.8864	12.7642	11.7171	12.3311	12.827	12.5192	11.6015	12.2026	12.0438	12.9604	12.306	12.4163	12.961	11.1909	12.1533	12.1056	12.9128	12.7597	12.0302	12.9711	12.8729	12.6106	12.053	12.2924	12.9054	11.6752	12.941	10.4023	12.1853	12.1992	12.9771	12.7988	10.8703	11.6317	12.8566	12.9498
TUBAL3	14.4998	16.4319	17.1279	17.1657	17.1767	17.4451	17.6013	17.1317	17.7327	14.4882	17.4805	15.0136	18.7127	16.4346	17.9421	17.8466	13.5132	16.716	16.4628	16.6079	17.3364	17.4259	17.4343	14.9829	17.2338	17.1508	17.6758	17.8809	15.5999	17.1889	14.6864	14.3968	17.0614	16.9568	16.9322	17.2073	16.9344	14.5953	9.8927	15.9619	17.506	16.2052	14.9283	16.9992	18.0673	17.6488	17.1725	14.6751	17.2398
FBLL1	14.6631	14.4245	14.7022	15.4486	14.7091	14.9706	14.6902	14.3583	15.651	13.911	15.0612	15.158	16.1711	14.7705	15.0373	14.2616	15.4332	14.4608	14.5595	14.3208	15.6756	15.1084	14.5007	14.5214	14.9902	15.1048	14.1538	15.5117	14.9419	15.0462	15.357	14.9087	15.2547	15.047	14.936	14.1111	15.3183	15.8408	17.1478	14.6533	15.7932	17.1262	14.4489	15.6316	16.2124	14.7172	16.421	14.9057	15.1468
SMCHD1	13.1623	13.7932	13.7019	12.8824	14.0388	13.5479	13.7497	14.2146	13.1237	13.0329	13.2044	13.4665	13.7104	13.4195	13.3693	13.362	14.4853	13.6496	12.981	13.4442	14.0715	13.9626	13.1486	13.394	13.3629	12.9307	12.8653	13.4577	13.5888	13.4763	13.462	13.7913	14.2915	12.5699	12.9688	13.9904	13.097	12.6675	11.7593	14.6672	14.6111	12.7928	14.0521	13.5235	14.9715	13.648	14.4041	13.9392	12.4502
ARHGAP32	11.8528	11.8898	11.5397	12.3973	10.7319	12.186	11.7947	11.3372	11.1119	12.1193	11.7234	11.1888	10.4598	11.9951	11.5675	11.2555	11.0953	11.8491	11.1932	11.5277	12.0141	11.7936	11.227	12.1893	11.6574	11.0695	11.2032	12.1035	12.1711	11.3772	12.0588	10.8413	11.2652	12.1393	11.2203	11.8123	11.9471	11.8882	12.4997	10.5498	10.7735	11.4885	11.6968	11.709	11.19	10.8422	12.1295	12.4614	11.5069
CLCA1	13.3254	11.7087	11.5749	13.6539	13.599	15.4011	11.7942	12.902	10.5288	13.6256	12.9995	14.3721	13.4923	12.7529	14.2718	11.9861	12.3705	12.3514	13.1711	12.5441	16.2271	14.8527	13.5721	19.2268	17.0387	12.8342	12.762	10.603	13.9827	13.6398	14.9	11.7319	12.192	10.4742	12.9539	11.3077	14.1673	11.8562	6.88694	12.1906	10.7921	12.582	12.8144	14.8237	12.2838	17.2928	13.8516	12.8803	11.3007
SNRPGP15	14.6337	14.0168	14.8677	15.163	14.7201	14.6415	14.795	15.2566	14.7201	15.3105	15.213	14.7649	15.516	15.0559	14.8019	14.7641	15.1402	14.8701	14.9187	14.8166	14.8886	15.139	14.8815	14.806	15.001	15.0121	15.0918	15.2013	14.4451	15.2148	14.7097	15.1951	14.5677	14.8226	14.9882	14.669	14.7437	14.1444	15.085	14.3317	15.5547	15.0275	14.3865	15.8734	16.0821	15.2587	14.4628	13.6232	14.2982
NUDT19	12.643	12.7869	13.2544	13.6709	13.209	13.0243	13.4648	12.2785	12.2791	12.7333	13.4282	12.8039	13.6998	12.9232	12.9892	11.6693	14.8328	12.1681	12.7913	11.4092	12.8912	12.4377	12.9008	13.4694	11.9057	12.5602	11.905	12.0535	13.0209	12.5941	12.255	13.1992	12.7951	12.3231	13.4758	12.7631	13.4059	13.5536	16.8375	12.9115	14.4972	12.899	11.5962	12.9369	14.4433	12.0933	12.4828	11.8379	13.5502
MYO1G	14.6577	17.3471	17.6175	17.4341	16.8199	17.1199	17.0542	16.0491	16.2163	16.9396	17.3379	15.4456	15.5588	17.2594	17.1688	17.2835	16.5825	17.0975	15.8896	17.5359	17.0457	17.136	16.7934	16.8918	16.9263	16.9632	17.3421	16.9863	17.7033	16.7757	16.872	17.2371	17.0159	17.2721	17.1203	17.087	17.3696	17.3923	12.5746	16.6956	16.2864	17.5464	16.6944	16.1771	15.5145	17.0696	16.9651	17.3039	17.6793
GPR89A	14.8113	14.029	14.9424	12.3301	13.7254	12.884	13.8547	12.8117	13.788	14.2377	15.0969	12.1074	14.9785	13.1653	13.8453	14.358	14.099	14.0876	13.4629	13.2369	14.3834	14.0078	14.5659	12.611	13.2125	13.2883	14.8183	14.5509	13.7182	13.5554	15.0594	14.2988	14.286	13.1734	14.7048	13.8227	14.4986	13.627	16.4585	13.9499	13.7349	13.0678	12.8068	13.5892	13.4446	14.6787	13.808	14.4064	14.5652
IGLL5	13.7433	15.9301	14.0028	15.4859	14.1597	12.1049	13.27	14.2602	15.2158	12.7493	12.655	13.7952	12.8958	14.7257	13.5387	13.7465	12.5807	15.042	15.4878	14.2363	12.8748	15.6174	15.5854	15.7855	14.9356	15.3047	12.0472	13.4906	13.2883	16.2555	11.5003	13.6011	13.8789	13.5108	14.7942	14.1732	13.1484	11.503	8.62523	16.2884	13.3825	13.5049	12.8423	13.7592	13.4233	14.3621	15.488	14.2785	13.5996
NACA	16.5394	16.7861	17.2961	16.5045	16.525	16.6159	16.5736	16.6091	16.9733	16.6242	16.8487	17.1796	16.0356	16.855	16.8992	16.8485	16.811	16.7367	16.4551	17.0617	16.8685	16.711	16.3948	16.5282	16.6337	16.9009	16.8543	16.9419	17.2289	16.2101	16.9745	16.7958	16.6368	16.7109	16.5769	16.3521	17.0745	16.6327	17.3252	16.392	15.9654	16.9417	17.2285	16.1402	16.3969	16.3478	16.4843	17.1707	17.2027
C11orf98	14.5398	14.2055	14.2578	14.7724	14.8585	14.4719	14.889	14.929	14.9194	14.3221	14.6879	14.6141	13.9359	14.1193	14.3488	14.7366	13.6885	14.4617	14.6124	14.6272	14.2604	14.4511	14.3033	14.3913	14.6481	14.4317	14.7475	14.9143	14.1239	14.8354	15.0413	14.647	14.5994	14.3928	14.5575	14.1854	14.3794	15.0739	15.526	14.7038	13.3238	14.1434	14.3538	13.0962	13.2195	14.3593	13.7263	14.4196	14.9023
SMIM22	12.3186	11.5643	12.7278	12.4987	13.3073	11.0651	11.0513	11.7761	12.8009	11.7912	12.8293	12.1213	11.7034	11.2889	12.0222	10.7531	12.5652	11.3995	11.637	11.7629	10.9335	12.7997	12.998	12.9071	12.2232	11.852	12.0801	12.3529	12.7747	12.3949	5.89154	11.1947	12.0518	12.8224	12.3334	12.7032	12.6479	11.196	8.87596	12.0964	13.3039	9.85153	13.0785	14.3517	11.2125	12.3966	11.4108	12.1164	12.3729
ASDURF	13.2878	13.0986	13.1814	10.4448	12.0477	13.9777	13.6508	13.3391	13.636	13.8262	13.925	13.6637	12.2756	13.24	13.8029	13.9335	12.2757	13.9115	13.6982	13.3319	13.8492	12.556	13.2774	13.9224	12.9486	13.6649	13.6337	13.4439	13.6033	11.044	13.2661	13.4978	13.7021	13.7763	14.2667	12.9086	13.9053	13.7754	16.2824	10.8378	12.2294	13.4638	13.3287	12.5677	12.4187	11.1981	13.5438	13.9368	14.1201
DNASE2	13.876	14.5823	13.2785	14.8484	13.1434	13.6358	13.8212	14.3221	14.5717	14.0371	13.9953	14.4148	13.091	14.4306	15.4933	14.5587	12.2956	14.3529	14.7622	13.9242	14.4367	14.7352	14.2358	14.9543	14.3071	14.4199	15.1902	14.4213	12.08	15.0214	14.6194	14.6569	13.9631	13.1967	13.6468	13.6673	14.0674	14.1242	8.42439	14.034	13.4142	14.2621	14.9027	12.2508	13.0149	14.0222	14.1609	14.8055	14.2571
AGPS	14.2761	14.1248	14.2024	14.2812	14.0764	13.9603	14.1803	13.6629	14.5088	14.1406	13.6066	14.4114	13.9568	13.931	13.9709	14.1589	13.6527	13.3285	13.7918	14.1338	13.7869	13.6146	13.3361	13.1555	13.5824	14.0701	13.2973	13.8807	14.3388	13.6822	13.6883	13.632	13.8251	13.9034	14.0052	14.1879	13.8976	13.3978	14.0031	13.8103	15.4055	13.4962	13.8584	14.0547	14.1722	14.3229	14.8248	13.6259	14.0443
KIF2A	14.2176	13.6573	14.1486	14.4259	14.5926	14.0846	14.1713	14.1476	14.2955	14.4493	14.519	14.067	14.104	14.4867	14.2806	13.9819	14.6185	14.6903	14.2206	14.201	14.0454	14.1192	14.1706	14.1301	14.1566	14.714	14.3145	14.2923	14.288	14.5277	14.4696	14.2379	13.6057	14.3178	14.3008	14.7825	14.4953	12.9699	12.2997	14.3154	14.3831	13.9908	14.2792	14.4099	14.3434	13.8667	14.6966	14.5648	14.0177
DDX39A	14.8749	15.728	16.8863	15.7059	15.2359	15.3883	15.5041	15.2424	14.8832	14.9388	15.8394	14.7756	16.8141	14.9477	16.5868	15.5406	16.2921	15.9047	14.9387	14.7287	15.6075	15.4253	14.6408	14.9191	14.8068	15.5684	16.2303	15.131	15.4316	15.9626	15.7335	16.0128	15.6649	15.3378	14.5988	16.551	15.9152	15.0488	16.4735	15.2331	16.9836	16.0961	16.0126	16.4399	16.5971	15.0723	15.566	16.0036	15.6306
PDLIM1	15.6847	15.926	15.0709	15.8639	14.6737	15.8605	16.1488	14.66	15.8174	15.4581	15.3514	15.7257	15.1497	15.394	15.6489	15.1584	15.5226	16.5156	16.1617	16.1545	15.8455	15.6021	16.3578	16.2626	15.7775	15.6089	15.98	15.6443	16.0051	15.8074	15.3087	15.845	15.8541	16.1698	15.6157	15.7743	15.708	15.3794	15.3927	14.9339	14.5945	15.4557	15.2747	14.6127	15.9154	15.4678	15.7379	15.8584	15.597
ACOT7	16.7545	16.7038	17.3407	17.0413	17.8571	16.8249	17.4352	17.2277	16.9413	16.7203	17.1969	16.9427	16.1121	17.2837	17.1705	17.0734	16.5641	16.6572	16.7795	17.6447	16.405	16.931	17.3043	16.2613	16.7278	16.8303	17.0031	16.3314	16.3632	17.0861	17.0925	17.4347	17.0608	17.2923	17.738	16.9787	17.5154	17.203	15.9078	16.8835	16.1872	16.96	17.4948	16.1873	16.4735	16.7641	16.7506	17.3666	17.1895
MYO1C	14.3624	15.8558	14.7651	15.1062	15.5439	15.7969	15.025	16.5106	15.0026	15.8846	14.8136	15.3819	15.8165	14.6948	15.4327	14.8405	16.019	15.3979	16.3012	15.2008	15.815	15.2382	15.9439	16.0471	15.8011	15.2462	14.8461	15.6557	16.1326	15.4112	15.7195	15.5337	16.1757	15.5372	15.3823	15.6032	15.607	16.427	14.9239	15.66	15.33	15.939	15.6133	15.9711	16.0457	15.5124	15.5638	14.9992	15.2507
MYO1F	13.5544	13.4405	13.194	12.6216	15.1352	12.6715	13.7302	15.5945	13.646	12.0068	12.5732	13.9072	14.466	13.1302	14.5836	12.6731	13.8177	12.8095	12.8771	14.2048	12.6046	13.2791	13.2924	12.9677	13.6251	12.3223	12.8878	13.1752	13.0219	15.4757	13.2486	13.8047	13.3176	13.0428	11.7294	14.1093	12.0306	11.937	11.3756	15.5973	14.0618	13.0466	13.5947	13.5878	13.7081	15.217	13.7677	12.8625	12.9031
SNAP23	13.4769	13.5837	13.2286	13.2681	13.8637	13.4071	12.951	13.4143	13.6868	13.0397	13.3749	14.1901	14.197	13.3656	14.0999	13.4418	14.0719	13.0111	13.6105	13.2394	13.207	13.4152	13.3604	13.5351	13.5784	13.0676	13.3116	12.9707	14.0482	14.1955	13.4891	13.7405	13.7615	12.8671	12.909	13.1814	13.1447	14.3736	14.9862	13.3663	13.8467	14.3063	13.2574	14.1282	14.0293	14.2511	12.779	12.9122	13.2388
HAX1	13.1807	12.7747	13.1579	12.513	13.5264	12.7097	12.8233	12.1955	12.7899	12.6154	13.5595	12.0945	11.7153	13.2736	13.3906	13.745	12.5141	12.5904	13.174	12.8759	14.2001	13.5832	13.175	13.0437	12.7533	12.7106	12.8685	13.6046	13.0927	11.1434	13.2207	11.4795	13.2036	12.403	12.5385	12.1373	12.6518	14.5833	11.4189	12.3495	11.6274	13.7497	13.0386	13.1447	11.6014	11.9048	13.105	13.5278	13.8056
AIP	13.7534	12.4975	13.865	13.8023	14.6115	13.4525	14.0577	13.9574	13.5631	14.5065	14.3787	14.2261	14.3182	14.0658	13.6759	14.5022	14.4778	13.6385	14.0903	14.1234	13.7907	14.05	13.8502	13.8737	14.2466	14.2873	14.487	13.9445	13.8639	13.9673	13.529	14.0326	14.4549	14.2279	14.045	14.4505	13.4855	14.1862	14.6254	13.9076	14.6158	13.3236	13.5589	13.8381	14.2218	14.1088	14.174	13.9655	13.7033
GTPBP1	13.6101	13.313	13.6045	13.4025	13.5366	13.5147	13.247	13.4409	12.5132	13.9588	12.7591	13.3603	13.4968	13.2527	13.0047	13.0843	13.298	12.6075	13.0251	13.7018	14.1248	13.7544	13.9794	14.1677	13.5967	13.0549	12.819	13.8237	13.4418	14.1205	13.12	13.0553	13.0863	13.4003	12.3389	14.0101	13.6077	13.6205	11.0076	13.9809	12.7074	12.9069	13.7916	12.3058	13.3426	13.1412	14.0379	13.6142	14.084
LGALS9	13.7336	16.3139	15.9352	15.6272	14.5651	15.5443	15.4099	15.0114	14.1879	14.713	15.4108	14.7155	15.5437	15.0642	15.2864	14.9835	14.9847	15.7221	15.2923	15.0255	15.6097	15.1571	15.9253	15.7449	15.6815	15.1051	15.5917	14.9058	15.3537	15.3546	15.7646	14.5263	14.5587	15.0034	14.798	15.5942	15.8845	13.6154	13.61	15.5202	15.2282	16.4142	15.6863	15.1678	15.7152	14.7069	15.2451	15.4197	14.9715
STXBP3	15.3327	13.3938	13.6875	13.4979	14.1048	14.5112	13.8512	14.0569	13.5693	14.6666	14.1579	13.5129	14.4932	13.3121	13.4049	14.2524	14.729	13.8531	14.3987	14.0988	14.0975	14.4296	14.6055	14.5007	14.2991	13.6404	13.9617	14.2035	14.5244	13.7233	13.9874	13.6536	13.8641	14.0781	13.7671	14.5652	14.2254	14.364	14.5775	14.2116	13.8776	14.2776	13.9949	14.367	14.4184	13.7475	15.1334	14.0281	13.7656
SMAP	11.2033	12.11	12.1001	9.55694	12.3675	12.6417	11.6554	12.7932	12.4746	12.6857	12.9954	12.3403	10.3147	12.594	13.6156	12.7134	13.0486	12.25	12.1922	12.6263	12.737	12.6865	11.7857	12.2987	12.5544	12.6582	12.3792	13.0585	12.1886	12.2443	12.6846	12.5016	12.2141	12.3712	12.2497	11.4442	12.425	13.682	15.6366	12.9888	11.1014	11.9952	13.1943	10.7478	10.897	12.3461	11.4414	13.4263	13.2245
RAB27B	15.1935	15.2207	14.9861	15.299	15.7379	15.9584	15.7293	16.1857	15.1281	14.8867	15.1823	15.4153	15.9448	14.9773	15.6854	15.0502	15.622	15.2389	14.1096	14.7446	15.431	14.7111	14.9316	15.4043	15.3194	14.6231	15.6563	13.6769	15.0742	16.5168	15.2122	14.9818	15.9465	14.6602	13.6493	15.1951	14.8431	13.4677	16.9153	16.168	16.2051	14.6634	15.7763	15.9704	15.983	16.338	13.9225	14.6605	14.7032
AP3B1	16.6155	16.7165	16.7956	16.1606	16.2215	16.4708	14.942	15.7741	16.1797	15.934	16.4567	16.2137	16.5273	16.1624	16.5185	16.0631	16.1283	15.8124	16.6741	16.0032	16.3337	16.3261	16.7653	16.6887	16.3402	16.6734	16.3609	16.2349	16.0253	15.7774	16.4856	15.7933	16.1079	16.6109	16.2522	16.2592	16.6914	15.7978	17.2852	16.2573	16.5623	16.3616	16.5522	15.2941	15.8023	15.6847	15.5457	16.0682	16.0226
SULT2B1	11.5032	13.7957	13.2545	10.6914	10.7483	12.9853	14.0314	10.6623	11.4433	10.333	11.2819	12.4711	13.0458	13.6503	10.3075	11.4296	11.4242	13.1337	13.6608	13.6519	13.4533	12.2348	14.0808	12.8265	10.6309	13.5315	12.7527	11.5718	10.8737	12.7544	12.9955	12.0848	13.0152	12.9883	10.7686	13.127	12.9125	14.2793	11.8652	14.0734	12.517	12.8555	12.7924	10.4226	13.7413	12.1973	13.5694	9.59891	12.79
LGALS8	12.655	12.2546	13.5265	12.0913	12.7336	12.6335	12.6309	12.9088	13.8347	12.802	12.6541	11.8	11.6875	12.7748	12.5902	12.7394	11.8322	12.613	12.7037	13.063	12.9649	12.8726	11.8671	12.5012	12.2995	12.6142	13.8746	12.6721	12.5782	15.0706	12.9411	12.6405	12.6715	12.3483	12.5547	12.6556	12.6957	13.0448	12.2204	13.1752	12.1053	12.8691	13.6109	12.5122	11.824	12.7047	13.8095	13.0466	12.9517
NDUFS8	13.6768	13.0355	14.5423	14.213	14.8134	14.1881	14.1526	14.7258	14.6744	14.4221	14.5465	14.7854	15.5654	14.5504	14.5626	14.7785	15.7909	15.0818	14.445	14.8993	14.3872	14.4869	14.4422	15.0936	14.9184	14.3868	15.0351	15.2554	13.752	14.7274	15.2572	14.3079	14.6841	13.9522	12.5909	14.493	14.2539	15.6352	12.6224	14.2512	15.7441	14.1229	15.1517	15.1115	14.6148	13.8119	15.2898	14.1198	15.4265
PSMD11	14.9491	14.2545	15.2686	15.2657	15.0903	14.8049	14.9357	14.7601	15.2624	14.8693	15.1633	14.7239	15.5424	15.1593	14.8038	14.9949	15.2617	15.01	14.9924	15.2519	15.088	15.0287	14.9746	14.7157	14.9061	15.1388	15.1647	15.0555	15.2037	15.0726	15.0241	14.8226	15.0389	14.6665	15.0417	15.8407	14.688	14.4607	15.5695	15.0876	15.601	14.5806	15.0773	15.2334	15.4767	14.7543	14.8239	14.9386	15.0409
PSMD12	15.0679	15.6609	15.516	15.1259	15.0062	14.9692	14.9176	15.0818	15.3611	14.8594	15.3478	15.0994	14.2743	15.3335	15.0687	15.3102	14.7124	15.2199	14.802	15.0422	14.7687	15.4032	14.9077	14.8312	14.8845	15.1882	15.5327	14.6351	15.0452	14.793	14.6963	15.0838	14.7647	15.1693	15.3999	14.9739	15.0273	14.9459	15.8004	15.1226	14.4245	15.3169	15.0698	14.7689	14.3794	15.0177	14.8837	15.3088	15.421
PSMD9	14.3282	14.0318	15.2232	14.1175	14.3325	14.4166	14.6346	14.6142	14.9264	14.52	13.8272	15.1605	14.8533	14.0109	14.3448	14.1139	14.5928	14.4133	14.1789	15.0603	13.814	14.53	14.3403	13.978	14.049	14.0639	15.1433	13.9148	14.5459	14.6766	13.8203	14.676	15.0147	14.1401	13.9929	13.9317	12.8098	14.2205	16.6568	14.2563	14.1815	14.5664	15.0212	14.9515	14.1905	15.3878	13.9243	14.6232	14.6723
PGRMC1	15.9304	16.3808	15.7048	15.6354	15.8561	15.6772	15.1775	15.7262	14.8197	15.7429	15.686	15.1083	16.2236	15.6413	15.4028	15.3832	15.6818	15.7371	15.8529	15.809	15.0745	15.7298	15.6205	16.0602	15.6577	15.5416	15.1795	15.6005	15.4339	16.0534	15.7655	16.3964	15.5332	15.3146	15.5885	15.3016	15.5883	15.2623	16.581	16.1151	16.0184	15.5532	15.4052	15.7325	16.0948	16.248	15.1631	15.6262	16.3391
SUPT5H	13.4505	13.4722	13.0491	12.3359	13.8127	12.964	13.2681	13.7055	13.5611	13.1046	13.57	12.989	13.3622	13.645	14.1334	12.6213	14.2065	14.9411	12.9067	13.3044	13.5487	13.5388	13.232	13.4227	13.4051	14.0359	12.4959	13.4308	13.4023	13.7522	13.8242	13.9211	13.214	13.0063	13.4912	13.545	13.4782	13.8136	15.4367	14.0365	13.8088	13.0521	13.3361	14.207	13.8378	13.1922	13.0836	13.1915	13.484
DFFA	13.6304	14.3192	12.9492	12.884	12.868	12.4088	12.6315	13.0928	12.6972	12.3963	12.2837	12.7474	12.3599	12.2087	12.3643	12.6644	12.3358	12.1801	12.1477	12.7144	12.4475	11.9395	12.2666	12.6453	12.2618	12.6485	12.4603	11.7784	12.3232	14.0005	12.9169	12.8303	12.8948	12.6597	13.5228	12.062	12.1395	13.6606	12.8069	12.6581	12.4851	13.391	12.3262	11.3759	12.1851	12.5608	12.9942	12.219	12.6465
HIP1	13.1218	11.5694	13.5597	15.8568	13.5626	12.9971	13.519	15.0748	14.2343	13.182	13.3248	10.8851	12.42	13.6748	13.5508	13.3416	12.4774	12.7661	13.4288	14.8956	13.9643	12.9348	13.5354	13.6935	13.0233	13.2835	12.8864	14.508	13.1863	13.6415	15.0522	13.7568	13.1697	13.3623	13.5722	14.2187	13.6976	13.8646	12.962	13.0373	12.0151	12.3978	12.8663	14.642	11.7898	12.021	12.8787	15.05	13.8368
CLIC1	17.7815	17.557	17.8145	17.7426	17.5978	17.5824	17.8596	17.4782	18.1411	17.8976	18.0254	17.2777	18.3763	18.0437	17.7211	17.527	18.6937	18.2102	17.75	17.728	17.523	18.0761	17.8674	17.669	17.6484	17.6675	17.6613	17.5811	17.8118	17.7039	17.4887	17.3298	17.4142	17.6604	17.2042	18.5081	17.9539	17.2822	17.1203	17.9384	18.2086	17.4055	17.6939	18.4177	18.2185	17.8336	17.6609	17.8117	17.9929
EIF3F	14.8469	14.6409	15.4367	15.5459	15.4716	15.4994	15.3871	15.5266	15.4992	15.3879	15.5492	14.8457	15.1686	15.5826	15.571	15.4893	15.2748	15.4716	15.3173	15.276	15.3143	15.4852	15.4055	15.3942	15.5195	15.5276	15.2993	15.4583	15.3021	15.33	15.5467	15.7136	15.274	15.381	15.3854	15.7911	15.5278	14.9222	14.6027	15.5202	14.3129	15.2385	15.9448	15.0691	14.8856	15.0782	15.3476	15.5856	15.5831
PDHX	14.1323	17.4588	12.788	13.3974	12.6121	13.6946	12.8453	13.9835	13.6114	13.1625	13.2897	13.1329	11.4272	13.0533	12.4642	13.7258	13.5123	14.4908	14.021	14.7054	13.9146	13.6416	13.6642	13.7108	13.1631	13.1164	12.8632	14.1553	14.8443	14.078	13.8493	14.0383	13.8073	14.1528	14.312	13.3029	13.3407	16.0171	10.507	14.4042	14.4888	14.1601	13.5187	12.8192	13.1891	13.7774	13.3204	14.1951	14.6236
MATN2	13.4244	12.2743	9.29211	13.6012	12.8084	13.8012	12.2447	13.362	12.349	11.9767	10.4224	11.5893	13.1373	11.5222	10.8068	11.9155	11.6797	13.2725	13.0868	13.1179	14.1193	12.7377	13.8206	13.9701	13.6919	12.7361	12.2551	13.5578	13.4453	13.1194	13.0484	11.9008	9.97388	11.8231	14.7128	13.1434	11.714	14.6665	11.8885	11.6644	11.0147	12.1803	13.0014	12.2799	12.9386	12.3412	12.0214	10.4565	10.5122
QSOX1	14.4214	15.1414	14.565	14.2487	14.1408	15.0759	15.6027	15.4219	14.7094	13.1792	13.5353	14.5484	15.5667	16.1626	15.9891	14.4631	14.5247	13.0143	15.4185	14.5043	14.2671	14.6609	14.6931	14.4951	14.072	13.6068	13.8633	13.2515	13.7691	15.3375	15.0107	14.1168	14.5069	13.7177	15.725	15.0292	14.7685	14.3703	8.20544	14.9717	14.8083	13.9804	15.2478	14.4135	14.1093	17.196	14.9492	12.6704	13.0271
WASL	13.1189	14.2838	14.1608	13.8419	13.8219	14.8058	14.8442	14.7327	13.5042	14.0274	14.2387	13.4441	13.9512	14.0651	13.2557	13.5239	14.0454	14.707	14.4033	14.3561	13.8708	13.7244	13.7675	14.1626	14.5271	13.2983	13.9143	14.711	14.1296	11.7368	14.8543	13.8515	13.6815	14.4019	14.3762	13.6911	13.7376	15.1789	13.0685	14.3968	13.6271	14.6764	14.3127	14.0142	13.9325	13.2251	13.7728	14.0382	13.5003
IPO5	16.8286	16.7541	17.1235	15.9657	16.4869	15.886	15.6168	15.8056	15.9076	16.6484	17.093	15.9667	17.1518	16.7798	16.3973	15.8917	16.3707	16.9632	15.8925	16.3552	15.9839	16.8879	16.0655	15.6311	16.2688	16.6284	16.0945	16.882	16.3569	15.5779	16.3573	16.106	15.6776	17.216	16.433	17.9116	16.7506	16.7853	18.0915	15.8627	16.5766	16.0805	16.4593	16.6889	16.9525	15.4249	16.1184	16.2905	16.83
POLRMT	12.3196	12.832	11.8485	12.2943	12.1629	12.5723	14.0012	13.5693	12.2579	11.3218	10.6994	12.938	11.815	11.7434	12.9801	11.9888	13.18	11.4978	12.6553	12.2904	12.9838	12.1923	12.529	12.0962	11.6034	11.6026	12.7272	13.1084	11.2262	11.9327	12.2695	11.3414	11.7253	12.6959	12.1091	12.5228	12.9268	13.5078	13.009	12.6477	12.9466	13.1102	11.7967	10.9889	13.0896	12.331	10.9725	11.2426	12.2398
DNM1L	15.3412	14.9454	15.4061	15.1587	14.647	14.8649	14.7008	15.4884	15.0396	15.2626	14.9255	15.2204	14.2776	15.2363	15.1387	15.0694	15.0189	15.9179	15.7977	15.0574	15.2745	15.0391	15.3001	15.6556	15.5327	15.8611	14.8945	15.1186	15.1075	14.3204	15.4288	15.0392	15.3155	15.4026	15.2472	15.4451	15.6405	15.7991	14.3706	14.5695	14.7859	14.7551	15.7998	14.3603	14.8355	14.7513	15.5527	15.3489	15.2194
RTCA	14.0542	13.2134	13.9845	14.3682	13.7434	14.0526	14.0021	14.0778	12.9727	14.2371	13.8933	13.9099	14.4157	13.7403	13.5184	13.4395	14.142	13.5155	13.7926	13.6733	13.6718	13.7453	13.7433	14.0917	13.8383	13.7236	13.6566	13.2662	14.0587	14.0346	13.4736	13.7376	13.9946	14.378	13.8913	14.2878	13.4356	13.1333	15.0541	13.1996	14.8902	14.0631	13.8426	13.7823	14.343	14.3955	14.558	13.0175	13.5132
PIK3C2A	12.3695	12.1688	12.1129	12.8298	12.6078	12.5228	12.2403	12.5869	11.9479	12.902	12.8443	11.7721	12.7742	12.9614	12.4431	12.7039	12.1427	13.2659	12.1383	12.2304	12.1868	12.5551	11.858	12.4871	12.4254	12.0199	12.5611	12.4226	12.7836	12.2738	12.8392	12.9755	12.5159	12.4809	12.8523	12.8816	12.0744	12.1916	15.2427	13.0171	12.8818	12.2022	12.7891	13.2501	12.6954	11.1733	12.4783	13.0572	12.862
GOLIM4	13.7999	14.425	13.6272	14.4919	12.118	13.1824	12.6643	13.5578	13.4788	13.8642	14.555	14.1664	13.8091	12.8198	13.3384	14.9498	13.4771	13.1848	13.7595	13.3113	12.9324	13.4431	14.8643	14.0189	14.0282	15.1728	15.1885	13.9262	13.8243	13.2611	13.8626	13.5308	14.68	13.6848	14.9942	12.9015	14.7937	14.8234	14.956	12.0243	12.6874	13.5611	13.6844	13.4087	14.691	12.9723	13.8097	14.817	13.5736
MANBA	14.5619	13.8557	13.4885	13.2028	13.9119	13.5633	14.1248	14.575	14.3114	14.1123	13.5734	14.5644	14.1711	13.5074	13.7201	14.0303	13.4457	11.7348	12.7372	14.4253	13.7237	13.9055	13.9391	13.5547	13.6488	13.8137	13.9945	14.1334	14.4918	14.6252	12.7957	12.0894	12.54	13.7133	13.6499	14.0033	13.4673	13.5562	16.0391	10.8443	11.7442	12.6938	11.9632	14.9888	11.6941	14.7562	13.5154	14.6186	12.8954
AGRN	15.5888	14.428	14.6458	14.5483	15.0322	14.9642	15.2236	15.4859	14.1372	15.308	13.8275	14.7128	14.831	14.6	15.27	14.5391	14.8984	13.5513	15.0699	14.7284	14.6124	14.9218	14.6682	14.8495	14.4689	15.3601	14.0276	14.9852	15.2647	15.3581	15.0891	15.0567	15.0445	15.4896	15.6116	14.9133	14.5905	15.2338	16.388	14.6392	15.1148	14.9071	14.4994	14.6425	13.745	14.267	14.7655	14.5204	14.5855
PLOD2	12.338	13.1828	14.0475	13.0297	12.701	12.7912	13.4295	13.1255	12.8304	12.0684	11.1031	13.2426	13.0621	13.0289	13.6402	13.6088	13.2967	12.6062	13.9788	13.966	11.1886	11.4923	11.8297	12.9013	12.492	12.9053	14.0439	13.651	12.8078	14.9046	14.1834	13.1059	14.139	13.9599	12.6878	13.2844	11.411	11.6268	10.9	14.7494	13.7364	13.0742	14.0321	13.124	14.2678	14.7184	13.6203	12.9821	13.9287
EXOC5	14.5876	14.1356	13.896	12.8404	14.4783	15.0274	14.4118	14.2231	14.2972	14.647	14.0243	15.0189	14.4358	14.6963	13.7493	13.4435	14.8581	14.3633	14.1268	15.0368	14.833	14.2568	14.5194	14.6246	14.6309	14.7093	14.2128	14.625	15.1558	13.5698	14.9378	14.4531	13.6088	13.3471	13.1289	15.1906	13.7312	14.4177	14.1124	14.5304	14.6897	13.3891	15.0038	14.1618	14.9612	14.875	15.5792	14.9272	15.0222
NDUFA4	14.495	15.3204	14.8483	14.7666	14.5953	14.3866	15.2335	15.4232	15.4245	16.682	14.8423	15.7289	15.8259	15.1788	14.6364	16.0782	14.7698	15.5026	15.7571	16.0618	13.5099	15.3143	15.7048	14.8239	15.4542	16.3109	14.9753	15.0397	14.4167	14.7668	16.0876	16.866	15.8188	15.8861	14.4488	13.9054	16.08	17.6253	14.0915	14.8056	15.1825	16.576	14.8619	15.1991	15.0298	14.8258	16.3577	14.8166	15.1617
PSMD14	15.0037	14.0424	15.5328	15.217	14.9709	14.8869	14.827	15.0714	15.2346	14.7815	15.3136	14.6406	13.7803	15.1978	14.6977	14.6648	13.9998	14.866	14.8597	15.1908	14.6337	15.1398	14.8589	14.4527	14.739	15.157	15.1304	14.2456	14.6486	14.8755	15.0389	14.8074	14.5021	15.12	15.4356	15.2942	14.8111	14.6272	16.0342	15.0669	14.0579	14.8909	15.4925	13.1582	13.8247	14.7254	14.9974	15.0681	14.8553
BIN1	12.6264	12.9927	12.0079	12.9478	12.3179	12.6934	13.7346	12.7138	10.6825	13.3326	12.219	12.2046	14.7272	12.5295	12.5345	12.3513	12.2042	12.4427	12.9544	12.1776	12.9512	12.2086	11.6848	12.2547	12.8751	12.9874	13.0479	12.9388	13.458	13.509	13.1178	13.0353	12.9585	12.0355	13.0756	12.8424	13.9376	13.5978	15.37	11.9756	13.2278	13.2234	12.7422	12.901	13.43	14.558	11.9947	12.1845	12.5844
KPNA3	12.0272	12.605	12.7876	12.2839	10.5721	12.0366	12.0068	11.3369	12.4855	12.0449	13.2715	12.4042	13.7	12.2249	12.2831	12.2065	11.9328	12.5	11.2836	12.6284	12.0797	13.5543	12.4938	10.7158	12.2202	12.9855	12.2325	12.677	12.3662	11.2213	11.87	11.2178	11.1061	12.6575	12.056	13.0359	12.8579	11.9942	9.94352	11.8109	12.2998	11.2863	12.0574	12.9437	13.1465	10.4336	12.7059	12.2246	12.3546
STK25	12.2933	13.9919	13.4831	13.5698	13.8294	13.8012	13.4117	14.1784	13.6806	13.4931	13.3421	13.7694	13.7684	13.6862	13.1733	14.1719	13.2904	12.9276	14.1169	14.0889	13.0677	13.6337	13.9169	13.4397	13.0893	13.1993	13.1649	13.8953	13.2515	13.9749	13.52	13.9194	13.6049	13.1725	14.2149	13.6509	12.9687	13.522	11.5383	13.9998	12.101	14.0516	14.0373	12.7398	13.6024	13.4581	13.6509	13.1693	13.3794
LAD1	14.5982	14.0358	13.3261	13.2654	13.3476	13.203	13.5109	13.4803	14.1303	13.4921	14.458	14.3199	14.1959	14.6719	14.3963	13.221	14.5809	14.8136	14.5078	14.7945	14.3396	13.9186	13.5766	14.2818	13.6117	13.8551	14.8125	13.8709	14.0893	11.9465	13.2394	13.8632	13.7017	13.987	13.7548	13.88	14.4913	13.1086	14.0859	13.9483	14.6073	13.6959	13.7413	14.4287	14.582	13.3983	14.0222	14.2574	13.4522
FAAH	10.8128	12.978	10.9872	13.5242	10.0642	11.6148	10.9325	10.0485	9.7349	11.0401	9.90816	9.77986	11.2786	11.6684	11.5723	11.5163	11.6607	9.98268	11.9282	11.5328	8.92633	11.8804	10.5198	11.1786	10.1233	9.30742	10.6818	12.3536	10.8401	12.609	12.4485	11.5259	11.2709	11.2317	11.6101	10.9716	13.0706	11.9079	9.2878	11.3194	10.8667	7.22491	11.6298	11.6887	11.1557	13.0131	11.4978	10.7193	10.964
VWA5A	14.1769	13.9981	13.3504	14.8283	13.2774	15.3932	13.2708	13.6195	15.1368	14.3875	13.5054	14.178	14.8589	13.639	13.5073	13.0314	14.2897	14.8594	15.2075	12.4638	14.4543	14.5531	15.4369	15.8416	15.3608	14.7119	13.1127	13.9726	15.3978	13.793	15.3824	14.834	14.795	15.2466	12.1037	14.2336	14.7724	14.7308	12.6193	12.403	13.9502	14.3616	14.9347	14.5653	14.7531	12.8182	15.0898	14.5481	12.385
PES1	12.9569	13.4073	13.2057	12.3343	12.9119	12.1031	12.574	11.7141	13.2472	12.107	13.4438	12.9244	12.8414	12.8315	12.809	13.1746	12.7562	12.3455	11.6433	12.5416	12.478	12.8089	12.4729	11.4923	13.1651	12.7329	12.5691	13.0024	12.6663	13.8591	12.8433	13.126	12.2696	12.5029	13.0869	13.3631	13.1279	13.558	14.784	13.2243	13.8587	12.8336	12.3973	13.6542	13.691	12.2038	12.7132	12.6825	12.9969
EBAG9	11.9032	12.4752	12.6587	13.0223	11.6296	12.5864	12.7369	11.416	12.0775	12.0621	12.2504	12.418	12.0153	11.2141	12.9763	13.0231	12.1078	13.1698	11.8639	12.2392	12.3716	12.261	13.1401	13.4069	12.9816	12.6056	12.7371	12.106	12.2905	14.0478	12.5672	11.512	12.5517	11.9211	11.5942	11.8622	13.2214	12.4676	15.5587	11.5772	12.7554	13.1988	13.8514	12.0969	11.6856	11.232	12.0636	11.6861	11.8678
SDCBP	13.5395	14.017	14.8997	13.3498	15.0157	12.9747	13.6446	14.2099	15.1503	13.6655	14.2213	14.0627	14.8432	13.7729	13.9827	14.4781	14.2656	13.2936	13.1306	15.2631	12.8544	14.3752	13.8218	13.003	13.8239	12.8048	13.7954	13.5731	13.0242	14.9736	13.8916	13.429	12.8726	13.2413	15.1059	14.6631	14.0948	13.1881	14.9608	14.7478	14.4454	13.1018	13.0723	14.186	13.9806	15.2066	14.7065	11.9199	13.606
NOP56	15.2266	15.4182	15.4686	14.7182	14.8905	14.7722	14.4833	14.6644	14.725	14.7702	15.1604	14.7365	15.087	15.2177	14.5193	15.3742	15.5554	14.4776	15.012	14.5859	15.5444	15.1645	14.7809	14.9234	15.1428	15.5096	14.7083	15.2229	15.5447	14.2528	14.7618	14.9359	14.9548	14.7736	15.1797	15.09	15.1961	15.081	17.2524	15.4662	15.3853	16.0407	15.395	15.1163	15.703	14.3322	15.3456	15.3546	15.1051
DDX3X	15.7751	15.1978	16.432	16.1188	16.1039	16.0519	16.5109	16.0612	15.6764	15.7341	16.1439	15.7347	16.6256	16.1799	15.9513	15.6713	16.0536	16.2644	15.5266	15.8517	15.5351	16.1856	15.851	15.7906	15.9903	16.0245	15.5766	16.4225	15.8009	15.8051	16.5767	15.8403	15.9147	15.6922	15.7437	16.2685	15.7051	15.9396	16.0173	15.9772	16.6601	15.6021	16.0696	16.3548	16.288	15.7886	15.719	15.5625	16.1524
RNASET2	13.3321	13.9459	12.4711	14.4251	13.0521	13.2384	13.3107	12.774	13.5352	13.993	13.9929	13.9752	17.0614	16.8786	14.4091	14.5679	15.5769	11.9035	13.8262	14.9875	13.382	14.4143	14.3107	14.6935	14.1844	14.5245	13.9792	14.7845	14.0958	13.3337	13.9363	13.4303	14.3103	13.7139	14.2559	13.9067	15.3754	13.6517	8.21299	13.9326	15.4142	13.3826	13.8195	14.9574	14.1258	11.8879	14.4449	12.338	14.2912
PODXL	13.4824	14.1293	14.0223	13.3244	13.4672	14.6384	14.6897	14.898	13.0299	14.6811	14.4951	14.5323	13.3855	14.2038	13.7646	14.7856	13.9006	13.9459	13.235	13.7563	13.0953	14.5373	11.5976	13.0048	14.3997	13.7813	13.5745	14.4255	13.8989	12.1172	12.9926	14.0515	13.5416	13.9226	14.1163	13.8155	14.038	12.1924	16.2224	12.4635	13.6942	14.0782	13.2185	13.4664	13.7475	13.7245	13.3846	13.3953	14.0964
KPNA4	13.6962	12.8732	12.647	12.9584	13.0388	14.032	14.1172	13.4878	13.0599	14.1497	14.2644	12.9845	14.3282	13.8058	13.266	12.6879	12.8202	13.662	13.175	13.4239	13.7528	13.6807	13.5978	13.4561	13.7503	13.7416	12.9998	14.0633	13.5145	11.8797	13.3252	12.7701	14.0012	14.2451	14.4583	13.9919	14.0449	13.8475	16.0363	11.7095	14.059	12.3787	13.1959	12.3164	14.9808	13.9131	13.2101	12.8625	13.3562
PPP6C	11.599	11.7344	12.8675	12.3697	12.5018	12.0435	11.7746	11.8315	11.9733	12.5063	12.0605	12.2659	12.9107	12.4069	11.9584	12.6301	12.1739	12.6275	11.3451	12.4645	11.5416	11.674	10.6947	11.6012	11.1298	11.6049	11.732	10.7037	11.8154	10.9743	10.5666	11.7646	11.6588	12.0098	11.3568	12.0604	11.2671	11.6594	11.4404	11.3756	13.8672	11.0251	11.5358	12.5683	11.8692	12.6839	12.6239	11.6877	12.0509
CES2	15.9939	15.8714	12.616	16.7658	13.6121	14.0835	12.1509	13.5039	12.1392	15.8071	17.9437	13.8047	16.5934	13.232	15.4455	13.9702	16.8899	14.7414	16.2479	16.3166	12.8571	14.5221	17.283	16.2896	16.7728	15.9305	15.7494	17.5659	14.353	14.4807	13.0623	17.6221	17.023	14.6957	11.1885	15.5339	18.0645	11.6382	13.3839	12.8848	15.9568	16.2243	15.202	16.792	16.9966	14.6646	12.6622	17.348	14.9677
PIK3C2B	12.8442	12.735	10.772	12.0422	11.7423	13.0636	12.5096	13.0284	13.1704	11.9852	12.8563	11.8202	12.6216	13.2739	12.7411	12.3028	12.8517	12.9388	13.0859	12.3711	13.3806	13.0996	13.2052	13.1355	12.5704	12.1024	13.6013	11.7114	12.9472	12.267	12.9084	12.2933	12.0612	12.961	12.475	12.6005	12.923	12.1766	10.9508	12.5046	12.1837	11.1219	13.0199	13.2186	11.6558	12.5722	12.8362	13.4631	12.589
MAN2B1	13.6471	13.3681	12.2532	13.8014	12.4783	14.4381	13.8344	13.9732	14.0537	13.5358	13.7528	14.0303	14.5584	13.6057	13.9525	13.4517	14.1231	13.3017	14.378	13.7797	13.8705	14.4317	14.169	14.5743	14.2415	13.9634	13.7062	14.4024	13.9247	13.823	13.4912	12.8793	14.1211	13.9277	13.936	14.8589	14.0403	12.8388	12.0171	13.5511	13.6439	13.3694	13.5902	12.5278	14.7907	15.3262	13.1784	13.4883	13.1168
FBP2	14.5887	14.8483	14.4096	13.9632	12.4985	14.4021	13.4582	14.1347	14.0982	15.9833	13.0038	11.309	13.0285	14.7494	13.6611	15.2741	14.0568	15.5888	15.1704	14.5639	14.346	14.0481	15.5633	15.3757	14.3013	11.0363	15.4537	14.7695	13.3648	13.8654	14.0088	15.9624	14.6631	14.5558	14.2871	14.7079	14.0869	15.1084	9.42778	15.7763	12.2838	13.5478	13.8639	13.5766	13.2925	14.0774	14.4049	15.4267	14.3683
PDXK	14.2625	15.0765	14.3039	14.4895	14.3912	14.944	15.161	15.5219	14.5337	14.9817	14.5926	14.9055	15.1814	13.9466	14.381	14.4029	15.2606	15.0164	15.1222	15.1416	14.1156	14.2723	14.4934	14.9359	14.733	15.0857	14.4117	14.7199	14.6423	15.1584	14.6806	14.633	15.3393	14.7587	14.1383	15.0112	15.0968	14.1925	14.8835	14.7003	15.1481	14.4155	14.5929	14.8887	14.5954	15.2669	14.496	14.2859	14.6935
SCD	14.4219	15.6457	14.3196	14.293	14.2996	13.8189	11.478	14.795	13.9273	13.273	12.2725	14.295	13.0962	13.6458	12.6866	14.2887	13.8713	12.8536	14.2225	14.9935	12.6282	13.7513	11.3968	12.2902	14.1968	13.6414	14.304	12.5186	12.8943	11.8812	13.8219	15.0919	13.3587	13.8724	14.0475	13.842	14.2855	13.2863	15.8762	13.2793	14.5298	11.9794	14.4517	14.8194	12.2352	13.3772	13.9146	14.4131	14.3557
PLPP1	17.9278	15.9055	15.049	15.9036	14.8049	15.7158	16.0057	19.1336	15.5296	15.8846	14.9953	15.0335	15.8383	15.8662	13.9428	15.6315	14.4495	15.7854	14.6939	17.6434	16.2871	14.9188	13.6622	13.5153	16.5736	16.391	15.606	15.5292	16.4853	16.6163	19.2688	14.6173	12.9948	15.3052	13.2194	17.1599	13.3876	13.9619	10.8138	15.8167	15.6642	16.6971	15.4191	17.5627	13.441	18.6915	17.8517	17.9308	17.9522
ARID1A	11.4921	10.7517	12.0983	11.7073	13.4916	12.8195	10.7624	12.3239	12.0842	12.9424	12.8981	12.4902	10.946	11.1929	13.1677	11.8185	12.8649	13.9364	12.047	13.1851	12.7775	12.1373	13.0616	12.3459	12.402	12.5746	12.2941	13.2096	12.5152	11.6835	11.8019	11.6782	12.8263	12.3449	11.8665	11.6769	12.7945	11.1055	10.1951	10.9401	11.0919	11.9969	13.1143	10.9658	13.022	11.6429	12.9381	12.3975	11.0882
TXNDC9	12.7104	12.8034	13.0813	13.0763	12.7822	11.9032	12.5592	12.1445	13.3302	12.394	13.556	12.4794	11.1919	13.4369	13.1719	13.2177	12.5412	12.844	12.6318	13.2974	12.3423	13.3776	12.9879	12.6705	12.8291	13.6218	12.2566	12.1254	13.2542	11.9118	12.0104	12.6446	12.0875	13.2162	13.1162	12.9104	12.2987	11.516	14.1542	13.3466	12.645	11.6775	12.4657	12.2626	12.9702	11.7002	11.9737	13.0332	13.1318
DPYSL4	15.1283	14.1487	13.3663	13.4951	13.2884	14.3853	14.5881	14.1089	14.1286	13.3261	13.4142	13.0667	13.1232	14.7202	13.118	13.3508	13.3383	14.4028	15.0597	14.0257	14.566	13.5075	14.6931	14.343	14.1928	14.3779	13.8353	15.0164	14.4568	15.0161	14.5349	14.0369	14.7321	14.4633	14.5826	14.063	13.8166	15.2219	11.7752	14.2248	12.1872	14.7708	14.2336	13.7766	13.7575	14.4207	14.0066	13.8873	14.0643
COX7A2L	12.6447	12.1521	12.4935	12.9446	12.3081	12.3518	12.2589	11.7943	13.0766	13.7646	11.8441	11.2155	14.0491	12.2315	11.2589	13.1887	14.3273	13.7085	13.1473	13.6535	11.9913	12.8162	13.8939	13.743	12.3831	13.346	14.3049	13.1831	11.6069	13.1395	13.4356	13.8077	13.2607	13.3846	12.8189	13.1498	13.471	14.2116	11.1307	12.9571	13.5448	13.5913	12.8091	13.3945	14.0437	12.9711	14.0541	13.427	13.4557
NDUFAB1	14.5586	13.956	13.9038	14.5748	14.2114	14.2889	13.8013	14.0105	14.5715	14.3922	14.2223	14.6339	15.0428	13.8578	14.1258	14.2413	15.0339	14.3463	14.3319	14.4615	13.899	13.7741	14.432	14.0182	14.2832	14.2466	14.6372	14.2634	13.8522	13.6499	13.7707	14.0692	14.0592	13.7608	14.2655	13.8782	15.0198	14.6094	14.901	13.3619	15.4331	14.4155	13.8009	14.5711	14.7253	14.3369	14.4194	14.2345	14.1803
UBFD1	14.7501	13.2182	12.6857	13.5663	13.7285	13.6247	13.6644	13.1447	13.6176	13.9567	13.9706	13.1449	12.8233	14.4031	14.4017	13.9073	12.463	13.9278	13.6737	14.5167	14.0166	13.6944	13.5751	13.453	13.7977	14.0172	13.8273	14.1871	13.6335	12.106	13.2403	14.1411	12.8157	13.9547	14.6697	12.0247	13.5548	13.9067	11.0678	12.4293	12.5868	13.8029	13.4629	12.7007	12.5252	11.9119	14.151	12.8644	12.6298
COPE	13.6744	14.4296	14.1029	14.5512	14.3664	15.2383	15.3064	14.7791	14.9471	14.7267	14.8024	14.7792	16.3249	15.0937	15.1203	14.3725	15.5365	14.8136	14.3342	14.8429	14.2455	14.259	14.3675	14.2021	14.7268	14.5613	14.8675	13.9903	14.3537	15.3886	15.5336	15.2175	15.1204	15.0324	14.6179	14.7369	14.7187	14.5882	12.1361	14.7073	16.0271	14.1787	15.1493	16.0254	14.9222	15.0016	14.5726	14.1204	14.2423
EIF1AY	13.5139	12.7922	13.3693	12.7544	12.5996	12.0418	12.1964	12.4207	13.1287	12.6989	13.7784	12.7676	12.4326	14.0524	12.8514	13.2011	12.2611	13.6103	12.6551	13.9105	13.4418	13.2662	13.1188	13.4901	13.0754	14.5967	12.9443	13.7752	13.4033	13.4205	13.1878	12.6661	12.7425	12.3983	13.6032	12.9091	11.939	11.5162	15.949	12.4198	13.45	13.6934	13.4392	12.7436	13.4944	11.5759	13.396	13.3854	14.1915
AP3D1	15.1699	15.7725	15.6332	14.9488	15.0534	15.1792	14.9843	14.9291	15.1823	14.7508	15.3175	15.353	15.839	14.7629	15.2145	15.157	15.8875	14.7665	15.0497	14.7698	14.8296	14.8795	15.282	15.1328	15.0262	15.2777	15.588	14.9695	14.9337	14.9293	15.1217	14.8756	14.6428	15.5012	14.9032	14.9854	15.4729	14.3565	16.5105	14.9878	15.9198	14.8998	15.39	15.8519	15.8316	15.1364	14.5759	15.1525	15.19
ABLIM1	13.3754	12.5025	10.5268	14.0176	11.8969	12.821	12.2567	11.5402	13.5667	12.6257	11.2801	12.4549	12.6984	11.865	11.9709	12.4287	12.0059	12.8782	13.282	12.1793	12.7709	12.3355	13.7568	13.1552	12.2608	12.7894	11.6282	11.1608	11.9851	12.7473	12.5368	12.9536	12.0752	12.6464	12.7374	12.246	12.4496	12.8976	11.2412	11.1327	11.9165	11.3206	12.6387	12.2488	13.2403	10.8417	13.3308	11.8756	12.2051
CHD1	13.3138	13.008	12.368	13.5177	12.7974	12.0942	14.0655	13.0148	11.8985	11.4747	12.6996	13.47	12.7683	12.1754	13.1807	13.085	13.201	12.8719	12.2307	12.6393	12.7679	12.9133	12.4345	13.372	12.8119	12.8897	13.7402	12.8063	14.0373	13.1089	13.2677	12.2769	12.7083	12.4167	12.3221	12.4088	13.1456	12.6329	15.9659	12.3631	13.9813	13.1871	12.2641	13.2515	13.0625	12.2849	11.8729	13.2647	13.0413
CHD2	13.6516	13.4406	13.7452	11.4952	12.9173	11.7438	13.0612	13.3534	12.5076	14.3072	12.5033	12.8138	11.9563	12.751	13.6648	12.756	12.4376	11.2178	13.1714	12.2023	13.9508	13.282	13.053	13.3288	13.68	12.9491	12.2778	12.0094	13.066	14.132	12.655	13.2046	13.0592	12.7176	11.7751	12.5013	12.565	14.0308	17.2328	14.1719	12.574	13.7892	13.245	11.3944	13.3893	12.458	12.0506	12.3095	13.186
GOSR2	13.9336	13.5319	12.9813	13.663	13.0539	13.4671	13.0318	13.1764	12.9438	13.1709	13.6995	13.5259	12.9629	12.9556	13.5769	13.1834	12.5782	13.085	13.5623	12.8325	13.4113	13.6331	13.1462	13.8027	13.5087	13.2773	13.5284	13.0012	12.5384	13.1998	13.4198	13.5387	12.7244	12.8982	13.5576	12.6988	13.4463	13.5155	15.1245	13.5496	13.1895	14.2828	13.6246	12.56	13.0076	13.3245	12.9761	13.313	13.689
TOR1A	12.8928	13.1567	13.882	13.9273	13.2386	14.1767	12.8953	14.1104	12.5642	13.035	12.7891	12.2557	13.0148	13.4019	13.0149	12.1827	13.2269	13.1226	13.3677	12.825	13.4333	12.9959	11.8711	12.329	13.5186	11.9708	13.18	13.5361	13.4376	13.7055	13.0984	12.6679	12.9191	12.6211	12.4278	13.4099	12.3095	14.4269	12.3009	13.4536	12.3575	13.2711	13.1689	12.3551	12.3657	16.4565	13.3395	12.9321	12.7212
TOR1B	14.189	13.9751	13.7199	15.5827	13.2917	13.8931	14.6519	11.6337	13.8828	14.2443	12.4503	15.6238	12.9277	13.3165	13.7453	13.1827	12.6779	14.1418	14.4369	14.89	14.2193	14.1022	14.2117	13.6101	12.9042	13.4319	13.8689	12.7809	12.8888	16.1287	12.4953	13.4293	13.3332	12.8264	14.257	12.3002	11.6769	13.4354	8.66334	14.4149	13.7415	13.7341	12.3542	13.9133	13.1783	15.2922	11.8329	12.6742	13.5989
STX16	12.558	12.2835	13.0985	13.88	12.2891	12.7397	13.4816	12.1805	12.8263	12.8601	13.4446	13.1098	13.9184	13.3417	12.3401	12.6757	13.8129	12.9561	13.4055	12.3589	12.9563	12.9623	12.266	12.6775	12.6652	12.8049	13.2427	13.4434	13.0773	13.4342	12.2403	12.0953	12.9123	12.4929	12.5026	12.5808	13.1646	13.405	15.8293	12.0344	14.1183	12.9683	12.3617	12.0826	13.1267	13.4315	12.6883	12.4204	12.296
ADAM10	15.0646	15.3584	14.311	14.5283	14.9719	15.7244	14.5029	15.2755	14.5695	14.5126	14.6851	14.731	15.1972	14.7928	15.055	14.955	15.0637	14.7807	14.7494	14.5748	15.2243	15.0683	14.3672	15.4478	14.9301	14.6011	15.1112	14.7017	15.086	14.95	15.1682	15.1316	15.0377	14.5856	14.6589	14.6783	14.7382	15.3589	16.1229	14.9183	15.2785	14.863	15.3282	15.0596	15.2536	15.2161	13.9165	14.8152	14.8623
ABCD4	12.9854	11.8309	11.7612	10.4707	11.6902	12.464	11.9152	12.301	12.6438	12.7527	12.3915	12.6714	11.168	11.9114	12.6264	13.9927	11.4056	12.7913	12.8657	12.4931	12.7393	12.9345	11.8435	12.4763	12.393	12.2574	13.7675	12.4307	12.6421	12.6769	12.5882	12.732	12.1959	13.0449	12.3023	11.5812	12.3844	12.3154	14.8128	11.9997	12.4608	11.8245	11.9734	11.005	10.9972	11.1676	12.1636	14.2112	14.1103
EI24	15.5531	16.1454	15.6887	15.9666	15.3848	16.1332	15.8644	15.687	15.8408	16.0727	16.0929	16.0488	16.1644	16.0284	15.8912	16.8686	15.9782	16.1013	15.2222	15.1191	15.755	16.2801	15.2903	15.7849	15.9115	14.4067	16.8873	15.1849	14.6001	15.1688	16.0226	16.0806	15.7596	16.0144	15.1067	15.5716	15.6118	14.219	16.6303	15.8148	14.9354	15.0061	15.7286	16.3445	14.1367	14.4426	15.4517	16.0803	15.9389
TP53I11	12.6249	14.7652	12.9177	13.412	13.7203	14.6086	14.8272	13.4554	13.8028	14.9237	14.5235	14.6057	14.2657	12.8404	15.5367	14.7798	14.0768	15.0936	13.318	12.4096	14.8572	14.3158	13.2135	14.7412	14.6893	13.3747	15.5693	14.4083	14.062	12.999	14.1478	14.1965	12.6263	13.9645	14.9637	14.1448	15.2569	13.8735	14.5123	13.7824	14.0369	13.5048	14.6217	14.2647	14.8619	13.4117	12.5362	15.3054	13.6016
KMT2D	9.76379	10.7342	10.4637	12.0055	10.2003	9.68918	8.61403	10.3862	10.1313	11.8833	9.80222	10.7502	10.5779	10.9445	9.65449	10.1562	10.5194	9.746	10.6508	9.32517	9.70198	10.3325	10.4003	9.75704	10.8588	10.0589	9.49943	10.5092	9.5061	11.0647	9.74842	9.86993	10.1471	9.70816	10.2027	11.0906	9.99904	10.5864	10.9556	10.7424	11.0741	11.9128	10.6301	11.2398	11.299	12.0424	10.5331	10.0311	10.5963
APAF1	12.5571	11.5895	12.0891	12.7387	12.3465	12.7836	13.2186	12.5756	12.7524	12.3365	12.1401	12.8687	13.7137	10.4889	12.8013	12.546	13.0628	12.5018	12.4591	12.2572	11.8549	12.0112	12.5594	11.9749	12.4778	11.9992	12.7886	12.349	12.6084	12.8425	11.4065	11.9696	12.256	12.2445	12.3829	12.9526	12.5554	12.2561	11.9308	13.311	13.2583	11.5863	12.3305	13.5652	12.8467	13.2654	12.8471	12.319	12.361
IMPA2	13.2078	13.3007	12.9878	12.9486	14.5624	14.1864	12.8971	12.0541	12.4587	14.2208	13.5175	13.7076	12.0637	13.3216	13.3705	11.816	12.4466	13.1892	13.3027	13.2953	14.7693	13.5794	14.1202	13.9005	13.8597	13.1872	13.403	12.961	13.8519	13.075	13.8204	13.4159	13.7936	12.7723	14.3445	13.2937	12.6654	11.9363	12.1552	13.6634	13.0089	12.1009	13.8923	12.4994	12.415	11.7953	14.0363	13.7505	12.9947
ACOT8	14.1021	14.823	13.7762	13.2595	13.2905	13.8053	12.1654	13.0475	13.2088	14.4286	15.2731	13.3474	14.1346	14.0566	13.4603	13.4398	14.3813	13.2447	13.8551	13.5197	13.2705	13.1958	13.7932	12.9386	14.2149	13.8874	13.765	14.8863	14.1837	13.9164	12.608	15.6227	14.0322	14.6606	14.629	13.807	15.2099	15.0124	14.2015	13.9222	13.8439	14.3871	13.3877	13.2894	14.7967	14.3535	13.7591	14.5675	13.667
PDCD5	13.5168	13.3811	14.9392	14.3009	14.3593	13.4126	14.543	14.3401	14.8817	14.2162	14.856	14.1554	14.734	14.6966	14.8851	14.2475	13.8497	13.9964	13.861	14.555	14.5327	14.385	14.3317	14.5	13.8498	14.572	14.2465	14.2067	14.4481	14.5225	14.1362	13.9959	13.8744	13.9467	14.2993	13.8945	13.8942	13.0581	15.5358	14.3473	14.7729	14.0158	14.187	14.1472	14.6554	13.9846	14.0589	14.4118	15.1448
PRMT5	13.0429	11.7837	12.9348	11.7379	13.2421	13.2936	12.2738	12.7353	13.5077	12.3882	13.4691	13.2542	12.9519	13.4746	12.3444	13.4003	12.3349	12.9814	12.18	13.2335	13.4839	13.4783	13.1575	12.7291	12.6364	12.8726	13.2469	12.9655	12.9276	14.0718	12.048	12.682	12.4084	11.9977	13.3525	12.5085	12.815	12.4342	15.3614	13.0971	13.5323	12.6474	12.7436	13.7919	12.9607	13.4059	13.1365	12.7314	12.6064
SLC9A3R1	14.5685	14.9955	15.9712	15.6146	15.5235	15.0334	14.8229	15.2846	14.5847	15.2671	16.0001	15.2966	14.1052	15.7258	15.9405	13.7305	14.3739	15.6246	14.7382	16.0069	14.6787	15.3598	15.1211	15.4373	15.7163	15.7681	15.0984	15.1548	14.8012	15.5547	14.7959	15.9095	15.0918	14.6924	15.0581	15.5299	15.5043	15.0398	12.9406	15.2403	14.0987	14.6367	15.2727	14.5299	14.2132	15.1848	14.3193	15.5615	15.0749
TPP1	12.4607	10.388	11.4496	14.4897	14.1835	13.2313	13.3217	12.9384	12.5821	11.779	11.5378	12.7021	14.8186	12.3866	12.6574	12.385	12.3588	12.674	13.5619	13.6142	12.7985	12.6664	12.3808	12.3125	12.3979	12.0652	12.6539	11.2558	13.1502	15.0121	11.8508	11.9404	13.4501	13.4627	12.7425	11.8742	12.4229	10.5079	16.8404	10.2242	13.9372	12.1954	12.1505	13.5568	12.5831	12.7468	13.1841	10.9594	12.7414
TCERG1	15.0142	14.5488	15.2886	15.071	15.3034	14.9003	14.7505	14.8107	15.3569	15.0615	15.1681	14.9059	14.907	14.9003	15.2147	15.0402	15.4459	15.0948	15.1504	15.1552	15.4521	15.111	15.4257	15.0126	15.1122	15.1198	15.1358	15.0837	15.3194	15.0391	15.0744	14.9607	14.6794	15.1436	14.6576	14.8439	15.1921	15.265	16.0523	15.105	14.6557	15.2891	15.221	14.8854	14.5305	13.7893	15.7892	15.6324	15.5332
TNPO2	13.9035	14.092	14.8265	14.3184	14.4386	14.6498	14.5372	14.4554	14.2109	14.3152	14.4386	13.9687	14.9444	14.42	14.7721	14.5548	14.7533	14.6862	13.8604	14.0876	14.6461	13.9423	13.5966	13.6991	14.3742	13.8007	14.5145	14.15	14.1067	14.0587	14.1684	14.6198	14.4531	14.4623	14.291	15.1137	14.3765	14.2641	16.4093	14.2968	15.1026	14.0896	14.4223	14.4679	15.1731	14.6893	14.0605	14.3949	14.639
APOL1	11.3602	12.1034	11.0986	12.4136	11.3032	11.5636	12.6503	13.7523	12.3682	11.6634	11.6027	11.7266	11.2072	12.3433	12.2562	11.8557	11.6206	11.8877	12.0188	12.2467	11.0064	11.9818	12.6412	10.4378	11.6472	12.0647	11.9905	10.5031	10.5484	13.715	13.3537	11.5848	11.2693	11.7976	9.89873	11.6857	11.9641	13.4817	12.0105	13.7152	13.0093	12.4589	12.4523	10.3201	10.9489	13.4516	10.8784	12.4924	11.641
UNC13B	14.5181	13.1653	15.1223	12.5717	13.5677	14.1701	15.2788	12.6975	13.9811	14.5677	12.9281	12.9333	13.5408	14.301	14.6637	14.7041	14.1621	13.5092	15.3357	14.4241	14.9356	14.1527	14.4373	15.2607	14.8248	15.0449	14.4006	14.1807	14.5916	13.8794	14.4448	15.9794	14.2453	14.4173	14.4038	14.0972	14.2725	12.9432	10.8226	16.5269	13.4719	13.3576	15.1699	14.0759	12.6785	12.4463	12.2466	17.45	11.1152
POLR3A	13.5092	9.15864	12.5285	12.5146	12.5944	14.1898	14.6521	12.9137	13.0278	13.1841	12.8144	13.1879	15.675	13.0665	13.171	13.9621	13.659	13.0008	14.126	13.2974	12.8042	13.5827	13.4222	13.2915	12.797	13.7039	13.3194	13.5717	12.3351	10.0221	13.1877	12.031	14.7277	13.6656	13.9987	13.8645	13.858	13.6581	10.8742	13.3843	14.4291	14.3221	13.6947	13.0928	14.2727	12.7133	13.9087	13.0343	12.5625
PSMA7	16.2759	15.2162	15.6809	16.0921	15.6856	15.7585	15.7765	15.6986	16.0406	15.8112	16.2087	16.0884	16.4202	15.7748	15.6657	16.1747	16.1548	15.9192	15.8952	16.3233	15.9576	15.8773	15.754	15.5924	15.6685	15.8802	16.1869	16.0785	15.965	15.6064	15.9949	15.6354	16.0812	15.5849	15.9116	16.0087	16.0709	15.4961	15.8963	15.4081	16.0321	15.9524	15.8054	16.0458	16.1881	15.7483	15.6561	16.176	15.9516
SCAMP3	14.6863	15.2282	14.0404	14.0891	14.4123	14.7099	14.6346	14.8734	14.6576	14.87	15.0807	14.8127	14.3647	15.1208	15.1539	15.0064	14.4636	15.0712	14.5585	14.3865	15.2154	14.9247	14.7192	14.6602	14.5246	14.2728	15.1509	14.7254	14.4238	14.5167	15.1041	14.5665	14.255	14.9616	14.6781	14.4661	15.1099	15.1342	15.5983	14.9627	14.2548	14.2521	14.7055	14.3777	14.4801	14.3157	14.5744	14.9853	14.9874
OPLAH	12.8865	13.0511	13.0944	11.8325	13.8226	13.2703	14.2459	12.7506	13.0655	14.5612	13.1122	12.5137	14.2997	13.4268	11.9692	13.4129	13.5277	14.463	12.9268	13.758	13.4091	12.5739	13.477	12.9577	13.2894	12.5698	12.5032	12.7739	13.3749	13.4613	12.9588	14.2991	13.9212	12.8644	13.1869	13.406	13.4892	14.4349	15.89	14.9222	13.2656	12.67	13.4513	13.8684	11.4754	11.6584	14.2035	12.685	14.002
BCKDK	11.1223	11.6031	11.2503	10.2408	10.7973	11.4596	11.541	11.6589	11.085	11.6825	11.3519	11.1388	10.4307	11.4946	11.627	11.8197	11.5634	10.4665	12.0074	11.4713	11.2408	11.25	11.1031	11.2747	11.3445	11.2721	10.7803	11.1798	11.8102	11.0645	9.74977	11.5078	11.265	11.4573	10.7588	11.2903	11.9173	11.788	11.5852	11.8536	11.647	11.9839	11.1242	11.2738	10.6303	11.1339	11.3197	11.9959	10.6286
MGST3	14.3315	14.0923	13.9798	14.7659	14.2922	15.1998	14.3283	14.1858	13.4192	14.4777	13.7527	12.9269	15.2563	14.221	13.754	13.6288	13.7925	14.1664	13.5648	12.1389	14.4559	12.8366	13.2751	13.361	13.6095	13.3285	13.8634	14.0726	13.4506	14.272	13.8179	13.9981	14.6469	13.6563	14.5423	12.1715	14.7928	13.874	15.5983	14.2784	14.8917	12.257	14.4446	15.5939	14.9558	14.456	14.0895	13.2031	12.6627
IRF6	11.81	10.9893	11.15	10.1649	10.8858	11.86	11.7125	10.2616	11.5488	12.1734	10.4697	11.2605	12.5432	11.6715	11.3788	11.3942	12.6561	11.8297	12.8892	12.05	13.8489	10.2401	12.1202	11.8457	10.7678	10.6673	10.8327	8.87739	9.79668	11.9117	10.48	11.8647	12.9984	11.7881	8.35595	12.4277	10.5499	10.8144	11.171	12.8817	12.0006	11.5663	12.788	12.0509	12.0109	11.1321	11.945	12.1264	10.8062
TAX1BP3	14.3307	15.35	13.9441	15.4473	14.4024	14.9718	14.9026	14.6241	14.8485	15.2284	14.7885	15.3339	15.2696	14.9807	14.8738	15.0418	15.6246	14.3231	15.5104	15.3916	15.1107	14.8597	14.5622	15.5756	15.4454	14.7845	15.1833	15.1404	15.8883	14.1293	14.7081	14.967	16.1074	15.251	15.0007	11.8363	14.8834	15.102	14.6986	13.8264	13.6489	16.4685	13.8779	14.8607	15.3044	15.5144	15.7016	14.3221	15.076
GIPC1	13.5319	14.0349	13.8942	13.125	12.1836	13.9758	13.6939	13.1424	14.6464	13.6773	14.0778	13.6903	13.7267	13.5989	14.3903	14.0428	14.1896	13.9508	13.8567	14.962	13.6344	13.9503	13.3345	13.4433	13.7068	13.8928	14.1541	13.9831	13.3262	13.9648	13.6129	13.6151	13.8952	14.0332	14.2737	13.3642	13.5104	13.3614	10.1618	12.8641	14.8709	12.9058	13.554	14.5717	13.6351	13.4663	13.1915	13.7061	12.7453
IKBKB	12.015	13.6723	11.8226	14.2399	14.0103	12.8508	15.0629	13.0907	13.4595	13.7148	13.1572	11.8703	12.4792	12.1791	14.2681	12.9605	12.623	13.4392	12.0918	13.7383	12.6404	13.4879	13.7601	13.7323	12.8743	12.5214	11.7806	12.497	12.2261	12.8881	13.1799	10.1455	12.2107	12.7898	10.5603	13.4225	13.754	13.6251	11.3041	13.0467	11.0564	13.1487	11.6051	12.3942	13.3366	14.8998	13.7322	13.2916	14.1461
HAT1	14.8104	14.7076	15.2459	15.8131	15.8052	15.3561	14.7038	15.2552	15.3021	14.2691	15.1171	15.0858	16.8448	14.7474	15.4936	14.9501	14.1036	14.8331	14.8693	15.2601	13.9105	14.0618	13.9998	13.6978	14.208	13.855	15.4852	14.6968	14.7124	14.1392	15.2721	14.3885	14.1874	14.3258	14.4575	14.9385	14.8153	15.6793	14.234	13.7651	16.2069	14.9977	14.4882	14.981	15.834	15.2055	14.7025	14.6704	14.1066
UBE2L6	12.5053	12.008	12.2836	13.425	10.989	11.6413	13.1187	13.1726	12.9893	11.4617	12.304	12.4671	13.4118	12.1738	12.45	12.378	12.5156	11.9055	12.3382	11.5043	11.9811	12.1018	12.0409	11.7236	11.9429	12.106	13.3321	12.5971	12.5759	12.1648	12.1793	12.2405	12.1863	12.4984	12.1656	12.3525	11.3211	11.0007	14.7426	13.2262	12.6689	11.9852	12.3592	12.9985	11.228	11.9836	11.6022	12.9135	11.8212
CASK	14.4696	14.2858	12.9409	13.5984	13.1212	13.5567	12.5035	12.0621	11.8529	13.9777	13.689	12.2714	13.8687	13.1924	13.2521	11.5685	14.0181	13.2348	13.8854	13.4081	12.5558	13.1147	13.4609	14.0987	13.536	13.4289	13.2544	13.3928	13.4982	13.6557	13.0765	13.6542	12.96	13.6096	13.5852	13.582	13.4297	13.2923	14.6015	13.2146	14.2009	13.9267	14.1261	13.662	13.6516	14.4791	14.2939	13.9175	13.7502
UQCRQ	13.8829	14.7788	14.5961	14.5727	14.8013	13.7879	13.8951	14.0262	13.9881	14.7026	14.8327	13.3093	12.9833	14.5589	14.2076	14.7448	13.2546	15.4358	15.0956	14.7125	15.0893	14.5884	15.8549	15.6539	14.4739	14.9965	14.9252	14.0015	13.293	13.7752	15.0405	15.5417	14.4561	14.3421	14.1954	13.4883	14.588	15.9658	7.88873	14.2403	11.992	15.0877	14.6133	14.003	13.2376	14.158	15.338	15.0176	14.702
MYL12B	16.7901	16.3554	16.6408	17.303	16.3667	17.0141	17.1947	16.4616	16.371	16.8586	16.3971	16.9613	17.4217	16.3167	16.2624	16.2123	16.7445	17.1633	16.6214	17.1085	16.5125	15.8112	16.349	16.5496	16.2758	16.0459	16.6842	16.6413	16.5825	17.3547	16.4435	16.7979	17.4076	16.4754	15.7331	16.7566	16.383	16.4691	17.7908	16.2391	16.8424	16.6593	16.45	16.7793	17.3357	17.0582	16.9973	16.0153	16.7164
HGS	12.9281	13.9241	13.7353	13.3366	13.5279	13.2092	13.4466	13.1032	13.7998	13.1603	13.0841	13.6266	13.2444	13.6015	13.4645	13.5171	13.5427	13.2223	13.6233	13.7566	12.7207	13.258	13.2467	13.4834	13.3483	13.4654	13.7678	13.3784	13.3694	13.8023	13.1528	12.7556	13.1094	13.2988	13.0942	13.7767	12.9144	13.3366	9.70441	13.3749	14.6545	13.6492	12.84	13.5987	14.1445	13.2387	13.6117	13.2543	13.2783
VPS26C	12.3059	11.2914	12.3488	12.817	10.1233	12.1321	12.4097	13.0944	13.1429	12.8755	12.2488	9.7419	14.5276	12.5881	12.0803	12.8822	12.0258	12.8647	12.553	12.0129	12.5115	10.8537	13.173	11.9017	12.198	12.2438	11.2365	12.6476	12.9932	12.6341	11.0308	12.5011	12.0875	12.9256	12.9338	12.6647	12.0897	12.6983	12.1835	12.5392	12.9502	12.3271	12.5407	13.3346	11.5915	11.5119	11.8933	12.2639	11.2185
PPP1R12A	14.6507	13.6607	13.868	13.5408	13.8678	13.8578	13.8618	14.1624	13.9345	14.0076	13.1054	14.2395	12.8506	13.7666	13.9789	12.8402	13.6024	13.7965	14.1804	13.99	13.7811	13.6	14.0813	14.0139	13.8073	14.0517	13.9846	14.1094	14.0821	14.2497	13.6874	13.847	14.0731	14.2761	14.1041	13.5759	12.9741	15.7066	14.8555	14.1934	14.9171	14.3806	14.6196	13.8817	13.8889	13.978	14.1299	14.086	13.8764
SLC27A2	13.3068	13.8226	14.087	13.1247	13.6702	13.8042	12.8706	13.3201	13.4871	13.8187	12.8758	14.0444	13.832	12.5652	11.7651	14.6657	14.6931	13.8616	12.9721	13.5582	13.4747	12.5575	13.2752	13.2656	13.3218	13.0659	14.0641	13.3115	13.5744	14.5246	13.3359	13.2366	13.6759	12.0924	12.7583	13.8742	13.3285	14.8521	16.5134	13.0035	14.1711	13.795	13.3844	14.4181	13.959	12.2037	11.8199	13.0867	13.6861
GAK	14.4915	14.2192	14.0831	14.7774	14.2416	14.4429	14.0723	13.7535	14.2391	14.9563	14.0966	13.9795	13.9525	14.1338	14.1399	14.2683	14.8388	14.4361	13.734	14.2863	13.8789	13.7141	14.5433	14.2164	13.8113	13.8347	14.6056	13.395	14.32	14.0567	14.1205	14.2847	15.3231	14.1807	14.0841	14.5035	14.5214	13.2678	15.5908	14.0566	13.9864	13.8495	14.3315	14.4844	14.2793	14.1525	14.503	14.3637	13.8878
HNRNPDL	16.277	16.264	17.1431	16.0394	16.3929	16.1005	15.9864	16.3079	16.5906	16.5037	16.5598	16.4049	16.0042	16.917	16.7275	16.5631	16.5648	16.7255	16.2254	16.9538	16.1578	16.6146	15.954	16.2392	16.2595	16.6126	16.1908	16.7005	16.6412	15.8942	16.4348	16.9466	16.761	16.9071	16.2559	16.6596	16.0965	16.7819	16.9605	16.2573	16.8492	16.3851	16.5221	16.0188	15.7141	16.4784	16.2961	16.1461	17.2836
XPO1	15.551	16.0429	16.0872	15.3375	15.7024	15.6275	15.5047	15.4926	15.8897	15.423	15.8151	15.875	15.9597	15.9183	16.1411	15.9471	15.8552	15.6614	15.1487	15.566	15.5858	15.7703	15.1347	15.1773	15.2722	15.5669	16.2703	15.6521	15.6353	15.1208	15.3558	15.5276	15.2192	15.7388	15.9015	15.172	15.2119	15.2883	16.2302	15.6863	16.3511	15.8637	15.2793	16.3578	16.1198	15.3182	15.1919	15.8136	16.0044
BTAF1	14.1014	12.7374	11.6936	11.1338	12.4669	10.5987	11.9646	11.2301	12.5342	11.8428	12.0268	12.8644	11.8408	12.404	11.886	12.1114	11.8956	12.3896	12.0401	10.8918	11.6435	12.7404	10.8529	11.5605	12.8372	12.1331	13.027	11.6422	10.9698	12.0132	11.7992	11.6288	11.8655	12.7662	11.4245	11.2283	12.556	11.9432	14.1638	14.0672	12.0724	13.0843	13.2971	11.4955	11.6386	14.1183	12.4728	12.7715	11.4841
SPTBN2	12.976	13.9027	13.7515	14.322	13.8468	14.0293	14.2747	13.9332	13.3173	14.2235	14.3912	13.5408	13.7681	13.8951	14.7426	14.4073	13.9266	14.3172	13.761	13.3511	13.7265	13.7045	13.5145	13.7943	13.7349	13.379	13.8084	13.9755	14.743	13.821	13.9976	14.0443	14.248	14.5377	14.071	14.7926	13.6649	13.4564	15.6814	13.184	14.2361	13.9929	13.868	15.1643	14.642	14.069	13.8882	13.3716	14.1011
SEC16A	14.9083	14.3169	14.4016	14.5509	14.8517	14.7718	14.3834	14.2732	14.4906	14.5977	14.2384	14.3375	14.609	14.737	14.5378	14.5849	13.6444	14.5591	14.39	14.1723	14.8425	14.7487	15.0177	14.6166	14.4261	14.2966	14.472	13.961	14.5911	14.8632	14.7373	14.3784	14.508	14.4043	14.3762	14.5824	14.5606	14.509	13.6364	14.6809	14.764	14.2009	14.8507	14.6644	13.985	14.0691	14.6265	15.0563	14.6095
PLXNB2	14.3317	15.1612	14.5987	14.3763	15.5373	14.6392	14.1959	14.0647	14.0408	14.3759	14.2203	14.7333	14.9326	13.8791	14.3445	14.5685	14.5432	14.2163	14.2598	14.0288	14.2835	14.1684	14.3603	14.7216	14.0365	13.9586	14.6817	14.1336	14.5107	13.6199	14.4608	14.7951	14.3519	14.8657	14.3407	14.2647	14.6261	14.2989	15.9358	14.1978	15.0054	14.2379	14.4564	15.1522	14.6328	14.555	14.2278	14.4575	13.6805
U2SURP	13.7888	15.4856	15.281	14.7329	15.313	14.7234	14.6358	14.5547	14.9608	15.2317	15.4604	14.9667	15.2606	15.1991	15.1829	14.9621	15.7306	14.9551	14.2177	14.7698	14.8144	14.5849	14.0394	14.6663	14.9336	14.6427	14.9432	14.7442	15.2957	14.3448	14.5396	15.2691	14.952	15.0474	14.5657	15.1378	14.9666	14.8128	16.7675	15.8618	15.8134	15.5215	14.6506	15.7009	15.5895	15.2096	14.2217	14.8113	15.3767
SETD1A	15.1305	14.3548	14.3199	14.3563	14.1564	15.14	14.801	15.0679	15.6392	13.8562	15.0399	13.7931	15.5672	15.3743	14.2375	14.873	14.474	14.8831	14.2232	15.4826	15.8178	15.6017	14.736	14.9027	14.917	14.9484	14.6131	15.2509	15.4357	13.1706	15.3192	14.9028	14.5211	14.1513	13.4968	15.9936	15.0617	15.1417	17.807	14.5926	11.4718	15.146	13.334	14.8299	15.8267	13.361	14.2772	14.9182	14.862
SYNJ2	12.1876	13.5579	13.6924	12.1947	12.8338	13.1406	13.2928	12.9596	12.1475	11.949	13.2129	11.9979	12.7508	13.1764	11.9408	14.3323	13.5831	13.0187	12.8286	13.0129	13.3676	13.7895	12.9323	12.7955	12.8678	13.173	10.9554	12.8568	13.0493	12.0968	13.4719	13.9906	13.7041	12.7328	13.4067	13.4009	12.8422	12.3951	10.5712	14.2908	7.46107	11.6753	13.8977	12.1364	12.274	12.1285	13.7894	13.4544	13.4516
SYNM	15.9144	15.9395	14.9163	15.9841	17.1193	14.798	14.9352	16.2899	15.2533	14.2367	15.9482	14.8096	14.6775	14.7571	16.038	15.8611	14.9995	15.85	15.7787	16.0915	15.0329	15.7199	16.2187	15.5994	15.8801	15.2638	15.7477	16.0544	15.4391	16.6421	16.2501	16.8457	15.8023	15.8727	16.1987	13.8761	15.0061	17.5366	16.3138	15.0347	14.3415	15.6229	14.884	13.8129	14.5627	17.3317	15.2507	13.8513	14.7352
KIF3B	12.1925	11.3937	14.117	13.4235	13.1569	13.1894	13.5097	12.3484	14.5907	13.3611	12.9251	13.4958	12.9829	13.1332	14.5163	16.983	11.532	13.7959	13.3364	13.4126	12.3284	14.4307	14.1234	12.3891	12.6786	13.3832	13.4739	12.4477	11.9847	14.807	13.5479	13.1189	12.9016	12.1995	11.5577	12.2085	13.2444	12.162	11.0835	13.8103	12.4064	13.378	13.6552	12.416	12.1052	14.7551	13.2906	14.0657	14.0341
PFAS	12.1237	12.2556	13.2065	13.8453	14.2237	13.5807	12.9832	13.6812	13.1934	13.3525	13.7335	13.8539	13.8381	13.7934	13.7247	14.3628	12.9883	13.4026	13.5245	13.1696	14.459	13.6924	13.515	13.5109	13.6152	14.4302	13.4194	13.5098	13.6501	13.229	13.4276	13.39	13.3895	12.7229	13.4969	13.6806	13.4944	13.1007	13.9687	13.4823	11.4846	14.2771	14.2381	13.5915	13.5904	13.2974	13.3589	13.4923	13.0098
ANKRD28	11.6996	11.5154	11.3601	12.513	10.4805	13.255	12.2591	12.3209	12.1197	13.3597	10.7399	11.8438	12.7863	11.9583	12.1988	11.9539	11.8142	12.6083	10.5676	11.6541	12.307	11.2563	10.5642	10.2713	12.2129	11.007	12.0773	11.3532	11.8924	12.1025	9.81384	11.1563	11.0585	11.2523	13.067	12.0375	11.7454	13.6017	13.2191	11.3057	12.5701	11.4552	11.089	12.4609	11.6811	12.6775	12.0684	11.9802	11.1395
ARHGEF11	13.7294	12.5641	12.3836	12.781	11.3946	14.152	11.4089	12.9093	11.5234	13.8554	11.9598	11.6056	12.0768	12.9829	13.363	12.8458	14.4807	12.8151	12.6808	11.2233	14.2399	12.7167	13.2478	11.8736	11.8961	12.6956	11.2913	12.1228	11.9228	11.8235	12.332	12.9135	11.7738	12.8089	13.0368	11.6443	14.3106	13.1423	11.6585	12.4202	13.4252	14.3135	12.6364	12.3697	11.9247	11.315	13.7009	13.2838	13.4307
PRORP	12.0853	11.6993	12.9765	12.1386	12.6697	13.5551	12.073	12.759	13.2824	12.274	12.1965	12.7803	13.1561	12.708	12.5353	13.2214	13.4471	12.3525	12.3053	12.5836	13.6715	13.0946	12.4585	11.9942	12.142	12.8502	13.2984	13.1154	12.9234	12.9181	12.742	12.5038	12.7882	12.4262	13.086	12.9357	13.7822	12.9337	11.9983	12.8315	13.9271	12.2037	12.374	13.3326	12.6367	11.6567	12.5683	13.1434	12.9451
CHUK	12.3761	12.6511	13.3156	11.6387	11.9555	11.7965	11.9754	11.9866	11.8532	12.2436	11.4078	10.0955	10.7699	12.1489	11.6452	11.0471	12.2893	12.0733	11.8531	12.1944	11.5346	12.1447	12.3081	11.5409	11.6366	11.9132	12.25	11.0984	11.9419	11.7465	11.1862	12.2389	11.1237	11.9305	10.8771	12.4262	11.6145	11.7877	12.4105	12.1515	12.7218	12.1847	12.3187	11.2609	11.1152	10.7173	11.5534	12.3632	12.0263
FYB1	9.97253	12.186	11.428	12.3512	10.1626	10.3766	11.0589	11.671	11.0343	11.8589	10.8841	7.72285	11.6892	10.474	11.0694	11.1232	10.9936	10.7514	12.148	10.8632	11.9433	10.9755	10.8772	11.0188	10.2631	11.0414	11.821	11.0107	11.1204	11.1937	11.3027	8.84697	8.71078	11.9982	11.5241	10.9164	10.872	10.6044	11.9765	11.1318	12.194	11.6568	11.5438	12.0481	11.0208	11.8155	11.7738	11.6585	12.2795
NPC1	14.4006	15.3282	14.6464	13.1206	14.5343	14.4383	14.9363	15.1933	12.3167	14.21	14.5622	14.9562	15.0997	13.7341	15.1835	15.015	14.3567	14.2988	14.5751	13.7173	14.5503	14.8549	14.3749	14.3722	14.7626	13.2196	15.1057	13.8308	14.5747	14.8371	15.0388	15.0524	15.0336	14.4952	15.0777	14.0837	13.2159	13.2792	15.7089	15.0733	15.5842	13.5328	14.7561	14.5768	13.6251	14.8072	14.5072	14.5944	14.7041
AGPAT2	14.8097	16.3003	13.7965	16.2362	15.3721	13.5241	15.0394	14.5813	14.9589	14.8196	16.5612	15.406	13.5652	15.2758	15.3016	15.2718	14.1453	15.975	15.5055	14.2451	14.0046	15.4529	15.821	13.4547	14.5657	17.0866	14.9109	12.7295	13.1916	13.3125	12.9633	13.3906	14.473	14.594	13.7455	14.3624	14.2666	14.3868	16.9234	16.4194	15.8246	12.7876	13.4222	15.5454	14.2981	13.7318	14.358	16.254	13.1783
SCAMP1	12.2753	14.0782	12.5628	14.072	12.9204	13.4313	13.6219	13.5972	12.5191	12.7662	12.487	13.8221	14.9654	12.468	12.9214	13.1613	12.7908	13.3761	13.42	12.2011	13.1137	12.1168	12.5244	13.6004	12.7636	13.4149	12.8584	13.9584	13.1615	13.7826	13.5679	12.5304	12.9664	12.4023	13.4762	12.2178	12.7715	12.8098	13.354	11.8054	13.5126	13.4264	12.8259	12.9228	13.975	13.6263	12.3468	12.5186	12.3626
SCAMP2	15.0248	15.2583	14.0859	15.0004	14.4612	15.009	15.111	14.8373	15.1456	14.9199	14.9704	15.5599	15.9607	14.2796	14.8468	15.198	14.5509	15.2477	14.7539	14.5646	15.0762	15.2017	14.5465	14.5585	15.0305	14.9716	14.8095	14.8893	15.0437	15.2569	15.1376	15.1173	14.916	14.9028	14.2264	14.7668	14.8999	15.3763	16.3851	14.9636	15.7637	14.4488	14.8634	15.6763	15.5286	15.5643	13.9403	15.1334	15.0045
ARPC1B	16.8036	16.017	15.8239	15.7871	15.2615	15.9172	16.2546	15.9402	15.8146	16.2551	15.7718	15.6526	15.8946	15.5006	16.2254	15.2444	15.6788	16.212	16.235	15.8519	15.8858	16.1569	16.105	15.8919	15.9093	15.8435	16.0314	15.8717	16.1031	15.9327	15.4643	15.6951	15.8714	16.4048	15.8566	16.164	15.7216	15.1143	14.9054	15.6751	16.2722	15.7779	15.6179	15.4364	16.1055	16.3764	15.9765	15.9171	15.7407
ARPC2	16.7181	16.1698	16.2107	16.0807	16.0069	16.105	16.2403	16.1711	16.4851	16.3525	16.0379	16.1211	15.9127	16.1372	16.3086	15.9551	16.7392	16.0192	16.4398	16.3579	15.9092	16.2555	16.3421	16.2137	16.1389	16.0759	16.6686	16.0317	16.0754	16.4651	15.5811	16.2128	15.8428	16.4512	16.2902	16.2522	16.0915	15.8654	15.5788	16.5346	16.3991	15.8148	16.2539	16.086	16.0858	15.9397	16.1071	16.3518	16.0655
ARPC3	16.5295	15.9169	16.4329	16.9947	16.3316	15.5262	16.1968	16.3064	16.3009	16.68	16.6878	15.6295	16.5836	16.6116	16.6559	15.126	15.8943	16.6776	16.9906	16.1766	16.0406	16.9485	17.033	16.8818	16.7681	16.8399	16.2368	16.4911	15.2221	16.6596	15.7479	16.1484	16.6007	16.8716	16.8851	17.2416	16.11	14.1326	17.497	16.6134	16.6885	16.1184	15.7411	16.0153	16.3737	16.7084	15.4441	16.6074	15.7124
POLR1C	12.8238	13.1735	12.9596	12.66	13.7638	13.2443	13.0602	13.225	12.7175	13.5549	13.8373	12.13	14.3215	13.7906	13.2743	12.6944	13.5507	13.3014	12.7907	12.8571	14.0179	14.2508	12.7373	12.5725	13.1964	13.1431	13.2575	13.3995	13.4007	11.1549	13.5067	13.3023	12.9808	12.654	13.2247	13.0688	14.217	13.9995	16.2692	12.4848	13.7019	13.0205	13.9944	13.7868	13.4915	12.4925	13.5585	13.3923	13.2423
PLSCR1	12.6417	13.578	12.6292	11.4593	12.7827	12.5173	13.8946	10.6558	12.58	12.1173	12.8232	12.4891	13.6595	13.393	13.432	12.2413	12.0778	11.836	12.7128	11.876	12.0478	11.9017	12.9583	11.9177	12.8006	12.8827	11.9121	11.6928	12.463	13.7836	11.9729	12.1158	12.6828	11.5869	13.4241	12.2966	12.8307	12.6105	16.4646	12.6845	13.0666	12.4529	12.4141	12.2999	12.663	14.1667	11.8754	12.6128	8.15439
PGRMC2	17.5391	17.2172	16.7604	16.6197	16.6081	16.7912	16.5679	16.5784	16.5448	16.8642	16.7131	16.4736	16.7443	16.8196	16.6421	16.6662	16.4711	16.9021	16.6608	16.5069	16.4872	16.8642	16.887	16.6667	16.7959	16.4541	17.1066	16.681	16.4137	16.3426	16.6533	16.6906	16.3962	16.5507	17.0917	16.2009	16.862	16.3414	17.0461	15.8253	16.9973	16.7126	16.6255	16.073	16.7543	16.1222	16.3293	17.2403	16.8796
VILL	14.7424	14.1768	14.517	13.8812	12.4584	13.4916	14.7827	14.9299	14.0171	12.917	12.9246	14.2805	17.4038	14.1883	13.5326	13.4045	14.8408	13.7101	13.4976	13.448	13.3719	13.8261	14.527	14.295	13.5979	13.602	14.8339	12.5568	14.2079	13.8657	15.9638	14.0713	14.5634	14.1756	15.1794	14.3456	13.5932	15.4577	11.3323	15.4088	14.0749	14.7731	13.5399	14.6708	14.772	14.5249	12.095	13.2716	11.6695
PFDN6	14.3754	14.1518	14.8627	14.2101	14.344	14.1131	14.4716	14.0653	15.0073	14.3985	14.879	14.7783	15.0365	14.6448	14.1239	14.6869	14.8325	14.6464	14.4262	14.8029	14.1379	14.5902	14.0519	13.9576	13.9223	14.3778	14.8451	14.5377	14.1387	14.3804	14.2112	14.0309	14.0654	14.6698	14.3899	13.8566	15.2145	14.7348	14.8639	14.2054	14.7898	14.5807	14.209	13.7773	15.131	14.2373	14.3315	14.5313	14.4269
WDR46	12.2001	12.597	13.0673	13.8219	12.4237	13.5546	13.406	12.6929	12.4734	13.0215	12.8875	14.3461	13.6865	13.3696	12.4085	12.0562	11.3177	12.8467	14.2279	12.5122	12.6307	12.211	12.3502	13.2213	13.0007	13.2768	13.3804	12.8451	12.1989	12.6448	13.6308	11.8937	12.501	12.1655	13.0352	12.5607	13.1625	13.5637	10.9711	13.1965	12.1449	13.528	12.792	11.6272	12.1706	14.5416	12.783	11.8614	12.4627
NKRF	12.5148	12.8264	12.7733	11.5847	12.7158	11.1608	13.0723	13.7596	13.0059	12.9691	13.182	13.5196	13.864	13.3385	13.4307	12.7341	12.2368	11.5732	12.9675	13.7172	12.9003	13.2883	13.2554	13.1895	13.6214	12.6618	13.0437	12.955	12.0876	11.9781	13.6863	12.5269	10.6491	11.8095	12.9428	13.3406	13.3773	13.2129	10.2552	12.7019	11.813	12.7843	12.9544	12.6441	13.3687	12.9274	12.3069	13.3726	13.6016
GNPAT	11.5896	12.927	11.1448	12.4662	11.1244	11.2145	10.9213	10.7455	11.682	11.7765	11.6019	12.9015	11.1455	12.1572	11.6112	10.7507	12.3188	12.5606	11.405	11.0095	11.536	11.9797	11.3386	11.1014	11.0228	11.9251	12.6953	11.8791	11.8419	12.0658	11.5871	11.4777	12.0184	11.8074	10.9629	11.0625	12.2487	11.1447	11.2155	12.4954	12.6656	10.8519	12.5651	11.1614	11.6708	13.0707	13.7909	10.5663	11.9859
LAMA5	16.9398	15.8573	13.3415	13.3	13.6191	14.3656	14.1019	16.1499	13.1341	13.4493	12.1421	13.9649	13.4767	13.7873	13.322	13.1651	13.7136	13.0459	15.1383	13.4563	13.9695	13.043	13.5647	13.9912	14.1212	14.1534	13.8437	14.3423	14.4056	13.6127	15.1004	13.9941	14.5495	14.0206	14.7186	12.8475	13.2385	17.7101	11.8884	14.067	13.444	16.4693	14.1841	13.7316	13.4198	13.8774	15.9029	13.2847	12.9398
ZNF185	11.5246	5.84764	10.3374	10.3713	11.1007	11.9728	11.987	12.0074	10.8358	11.5765	10.7884	12.3852	11.3605	11.9915	10.4795	11.0602	10.2072	11.2196	9.94204	12.3944	10.8826	9.9512	12.0025	10.376	11.1377	10.7771	10.3372	11.3925	11.0488	11.0941	11.2138	10.5251	12.6823	11.7412	11.7166	11.3022	9.81031	9.59922	11.0052	10.3464	10.2442	11.0463	12.0932	10.7532	11.6731	10.0959	11.7235	10.5335	10.7246
CASC3	11.2897	14.6649	3.01851	10.5592	11.8078	12.3681	12.4114	10.471	12.8845	4.24116	12.4864	12.5626	6.6714	13.8411	12.4755	12.2078	11.0959	10.6939	7.63027	12.5624	3.82055	11.1097	10.926	11.8281	11.9547	11.185	11.7485	10.6357	13.245	12.1428	11.5728	12.1105	12.1987	8.5255	11.8167	9.94289	12.3749	6.05294	12.5202	10.9281	10.924	11.3336	11.3334	12.7859	12.0865	11.3164	12.0156	12.2396	11.9302
MRPS12	14.0083	14.0638	14.1038	14.4831	14.2767	13.908	13.8239	13.5512	14.3072	14.1033	14.6349	14.7157	12.1973	14.2733	14.18	13.743	13.3299	14.797	14.0519	14.2801	14.6534	13.836	14.3565	13.8239	14.0818	14.4374	14.4766	13.8328	13.7983	13.5651	13.8891	14.4232	13.5171	14.2958	14.1377	11.306	14.4383	14.31	10.2481	14.4333	12.9287	14.3156	13.9701	13.015	12.5495	12.7464	12.6882	14.207	14.4485
CLIC2	11.8401	12.1701	11.0551	10.7376	10.7548	12.4205	12.1224	12.0433	11.6225	12.1343	10.4025	12.4804	11.0899	10.6352	11.0077	11.5938	11.8632	11.5621	11.1284	11.5549	12.5173	12.4302	12.1031	12.9095	11.9398	11.5556	10.5303	12.0823	11.9251	12.4567	12.528	13.0516	12.6422	11.5884	11.3536	12.4663	9.1339	12.8907	10.7576	12.2382	11.544	12.7799	11.3644	12.3833	11.7564	12.8346	12.3712	11.9408	11.0587
ACOX3	12.5289	13.558	11.7711	12.8269	13.4678	12.7635	12.6094	13.2392	12.2871	12.9396	11.8616	11.801	11.37	12.1618	12.1094	12.1847	12.6336	12.069	13.013	12.2941	14.2141	12.0728	12.7804	12.663	12.2179	11.8188	12.3788	11.8799	12.331	12.8153	13.3174	12.8931	13.5307	11.9996	12.5583	11.8241	12.1669	13.1981	15.752	12.6003	12.3843	13.0733	12.481	12.5368	12.6537	12.1378	12.5697	12.1674	11.7897
SURF4	16.4788	18.088	16.1549	16.496	15.6964	15.9302	16.611	16.6196	15.2333	16.4704	16.2153	16.6748	15.705	17.0195	16.7062	15.2471	15.8583	16.0884	17.0245	14.3322	16.3074	16.4942	16.3714	16.8354	16.4829	16.103	16.2694	16.7036	15.2216	16.8584	16.2809	16.1341	15.267	16.6603	16.779	14.9156	16.156	15.3057	17.8502	16.6535	15.7621	16.6119	16.4162	15.5362	15.8843	16.1001	15.9976	14.3853	14.0127
MAPK13	13.1207	13.7446	13.028	13.4981	12.844	12.6588	12.8704	12.73	13.7485	14.9727	14.6135	13.883	13.9457	12.7924	12.8594	13.3576	15.2491	13.7312	13.2155	13.8841	13.8062	15.0465	12.9268	13.4261	14.5721	13.9297	13.99	14.8993	13.9623	11.7392	13.5221	14.2308	13.5611	13.8236	14.3243	14.1896	15.0908	13.3711	9.49349	12.4903	13.8056	13.5009	13.4714	14.383	12.4901	11.6469	14.3216	14.093	14.3588
SPTLC1	14.3955	14.6721	13.7779	13.9643	13.6764	13.8791	14.2632	14.186	14.2267	14.2598	14.1318	14.4225	14.2739	14.4284	14.1969	14.5683	14.3374	13.8058	13.6798	14.1394	14.252	14.5942	14.414	14.2313	14.1207	14.0376	14.3147	14.121	14.2537	13.4882	14.3789	14.4152	13.9329	14.4841	14.1985	14.089	14.7823	14.7989	15.3861	14.0568	14.0711	14.1086	13.992	14.0049	14.1802	14.2686	13.7741	14.7784	14.4878
SPTLC2	11.8162	13.6128	13.1123	13.0004	12.9436	13.1967	13.3809	13.2761	13.496	12.7425	12.7327	13.6753	14.1616	13.0988	13.2607	13.2153	13.6282	13.0105	12.0596	13.6732	12.9221	13.3119	12.7475	12.9477	12.9046	12.2497	12.8495	12.6892	13.016	10.5597	13.4346	13.2021	13.6362	12.1724	12.3583	13.0016	12.5099	13.2255	12.1245	13.1182	14.0782	12.8365	13.4666	13.609	13.5774	12.6408	12.7901	13.2869	12.9103
OGT	13.2829	12.8417	13.6387	13.8069	13.9047	13.8194	13.6801	13.538	13.5326	13.7586	13.9799	13.599	12.2837	13.8039	14.6622	13.8431	13.3037	14.0523	13.427	13.3127	13.2018	14.2802	13.6503	13.5805	13.3914	13.4338	13.6714	13.3598	13.7006	13.024	14.0869	13.6469	13.6825	13.6646	13.5028	14.0307	13.8821	13.5158	11.8266	13.3841	12.4927	13.8009	13.5532	13.1361	12.7106	15.0994	14.1593	13.8118	14.2404
PMM2	13.8309	13.6474	13.236	14.228	10.9507	13.0681	12.8265	12.4305	12.6477	13.9472	13.7576	12.8606	13.3078	12.8121	13.9851	13.7008	14.4956	14.6594	12.9018	13.6175	13.0673	12.3592	14.262	12.9273	13.2514	12.276	13.4992	13.5718	12.6148	13.0706	12.3862	12.4198	11.5633	13.3067	12.7657	14.0432	13.0645	10.6135	13.2943	12.5979	14.1612	13.3337	13.2492	13.7747	13.1339	12.3618	12.9992	13.4739	12.7667
TM9SF1	14.8275	14.2965	14.5183	15.0312	15.1185	14.3518	14.817	14.9551	14.785	13.5902	14.4522	15.1856	15.1907	14.8402	14.5098	14.8971	13.7277	14.4536	14.4598	14.1233	14.7625	13.9978	14.5474	14.288	14.5636	14.4624	15.1047	14.3762	14.5958	15.5448	14.7181	14.9156	14.7174	14.1991	14.2433	13.0337	13.9273	14.4479	14.5984	15.4152	13.6697	13.8137	15.0913	15.0513	14.845	15.6405	14.6709	14.2743	13.6331
HMGB3	15.7834	16.2663	17.4399	15.9481	16.6353	16.0003	16.0524	16.1813	16.865	16.2299	16.505	16.7703	16.6778	16.8899	16.2383	16.5844	16.5393	15.5766	15.8652	16.412	15.9851	16.5244	16.3147	15.7574	16.8641	15.5058	16.003	17.1864	16.4222	15.8436	16.8254	16.98	16.9599	15.0921	16.3763	15.4066	16.2761	16.597	18.5068	15.8384	16.9129	17.1077	17.2418	16.5334	17.4033	15.7223	15.5599	16.5329	17.2279
PPM1G	14.6598	14.5932	14.7052	15.3708	14.275	14.7678	14.8089	14.4985	14.5559	14.6714	15.5162	14.1248	15.7506	14.9128	15.0921	14.5464	15.731	14.8891	14.8195	14.8263	14.6037	15.2391	14.6718	14.4647	14.9529	15.0123	14.7474	15.114	15.3855	14.1071	14.6831	14.5135	14.926	14.9335	15.3439	15.5852	15.0665	14.486	16.6045	13.8381	15.8084	14.9212	14.6353	15.2467	15.6974	14.9368	14.8434	14.9215	15.1751
INPPL1	13.6724	12.8122	14.7036	14.4673	13.6039	14.3871	14.2639	13.6047	12.9834	14.4251	13.6467	13.8965	12.7731	14.4828	14.4914	14.2271	13.4623	14.1828	13.7426	13.0224	14.0821	14.0926	13.4418	13.8764	14.0211	14.1955	13.6349	14.0909	13.4267	14.6053	14.1048	13.981	13.6651	13.9666	13.8284	13.9172	13.6541	13.319	11.5867	13.4172	13.7151	10.7427	13.8265	13.2384	14.0294	13.8056	14.0952	13.4182	14.0407
EIF3D	13.906	14.1076	14.3127	14.2706	14.4455	14.133	14.3581	14.3625	14.1155	14.2855	14.3246	14.5625	14.7653	14.3768	14.3609	14.6155	14.6243	14.3352	14.0034	14.344	14.2377	14.3839	14.2023	14.1838	14.1922	14.4297	14.1938	14.0746	14.6073	14.3853	14.5199	14.5168	14.4114	14.0598	14.2218	14.6873	14.2239	14.1568	15.6685	13.9582	15.0687	14.3011	14.8553	14.8798	14.6365	14.2423	14.2288	14.1449	14.538
EIF3H	14.8458	14.7313	15.1596	14.889	14.4438	15.2555	15.2299	15.3331	14.5006	15.0236	15.3737	14.2338	14.7524	15.6113	14.9851	15.1609	14.7897	15.4051	14.8741	14.7711	15.1499	14.7761	14.4342	15.2165	15.2561	14.827	14.3241	15.4547	14.9504	14.9551	15.3464	15.2305	14.2645	15.4237	15.5786	15.2545	15.5372	15.4413	15.7879	15.4811	14.6754	15.4243	15.2055	14.3992	14.7649	15.5544	15.5734	14.6177	15.3532
BCAT2	13.0179	13.0641	13.8164	12.7481	14.0853	14.2038	13.7151	14.1596	14.7729	13.9892	13.5388	13.6727	12.6975	13.4325	12.5001	13.5874	14.2574	12.8555	13.5841	13.4999	15.232	13.3876	14.3876	14.081	13.7797	12.772	13.4951	13.047	14.1191	13.8203	13.4651	13.4127	12.9785	13.2414	13.018	12.5493	14.1072	14.6107	8.38955	13.0957	12.8147	13.3442	13.6084	13.868	12.5014	13.5861	13.5785	13.7586	14.9523
TMPRSS2	13.5473	14.8265	13.9571	13.9087	12.4662	12.2492	13.3076	12.0123	13.7109	13.3959	14.4065	13.2446	12.0446	14.2451	14.0603	13.9092	13.2051	13.8848	13.5017	13.7202	13.2909	14.0299	12.9831	12.3955	13.9194	14.5159	12.6067	13.2236	12.6335	12.1264	11.9345	14.2131	12.8196	12.8566	14.3631	14.288	14.7179	12.2767	15.9802	12.4803	12.5749	11.2156	13.1481	12.3264	12.2968	12.3505	13.0989	12.7071	12.4287
IPO8	13.14	12.1332	11.5375	12.1105	12.7162	12.714	12.0655	12.6877	12.5314	12.7714	12.1268	12.631	11.9048	13.5349	11.5286	12.0672	12.5406	12.5919	12.9668	11.9784	11.6458	12.388	12.3041	11.8035	11.2659	12.3557	12.0698	10.8894	12.0633	11.7179	11.6156	11.9785	12.0563	12.492	11.7282	12.46	11.2003	12.462	15.5444	12.7593	12.4035	11.3039	11.9256	12.2114	12.8279	13.218	11.8301	11.378	11.5576
STX7	15.8142	15.9112	14.8268	14.9505	15.3588	15.3819	15.6542	15.9057	15.6397	14.5188	15.7168	15.9808	16.1322	15.7441	16.0036	15.8017	15.2688	14.6568	15.2991	15.3362	15.9633	15.5571	15.3461	15.6637	15.0767	15.1833	15.3157	15.8349	15.846	15.4143	15.1557	15.2157	16.1665	15.5622	15.1724	15.3358	15.3832	14.7217	15.7557	15.3877	15.3579	15.2175	15.0783	15.6442	14.9773	16.6873	14.9111	14.9078	15.1518
SLC16A3	12.2828	15.4153	12.9549	12.3299	13.7562	13.6857	14.7341	15.0406	13.1605	12.4332	14.1844	14.6029	13.851	11.785	15.0895	12.3338	14.0145	11.9062	12.3736	13.4978	12.0664	12.7565	12.4549	11.9984	11.3062	11.8809	14.3217	12.1177	13.6435	12.3079	13.1359	13.0984	12.2937	13.1257	12.7423	12.709	12.997	12.9404	15.8631	14.9714	12.2771	11.9927	13.6896	13.2154	11.9309	14.6459	13.1116	13.0199	13.5686
ABCC3	14.8057	14.3024	11.8664	14.7492	14.2453	15.706	14.3741	13.4712	15.1481	14.5149	14.4374	14.0666	15.3594	13.8749	14.7553	14.8558	13.9421	13.6295	15.2019	14.6857	14.7844	14.1583	14.5572	15.6758	14.7593	14.1636	14.7562	15.1381	14.5856	12.8524	14.5034	14.5947	14.6271	14.8849	13.5077	13.6456	15.5214	13.9271	13.8075	14.7484	14.8613	13.8587	15.1773	14.6544	15.606	15.1002	12.539	13.8126	14.8411
ABCC4	13.6617	14.1394	14.1787	11.9367	13.413	14.0317	13.5102	13.0647	13.7513	14.4674	14.0387	14.8087	13.554	13.6745	13.7804	12.9557	13.7515	14.8127	13.6104	13.7688	14.7398	14.4135	14.886	13.8268	13.9324	14.06	14.6027	14.3096	13.7089	15.3333	13.5885	13.3301	13.7702	13.5239	14.2526	13.4252	13.8856	12.8206	16.4688	14.2963	13.2263	14.0187	13.3718	14.4496	13.5624	14.1266	12.8546	14.1535	14.0407
POLR1G	12.655	12.0461	14.0825	13.3527	13.5665	13.2482	13.4585	13.5705	13.3048	13.5941	14.1328	13.0831	12.5539	13.6408	13.619	13.4077	13.8059	13.594	12.4969	13.5479	13.8974	13.6756	13.0214	13.345	13.5158	12.9518	13.2713	13.1715	13.1549	11.6054	13.9033	13.7277	12.9109	13.3473	13.9227	13.4821	13.6344	14.4149	15.6486	13.3628	13.8678	13.9675	13.5517	12.0906	13.6292	12.19	13.1798	13.9854	14.7008
P4HA2	11.6389	11.8025	11.7676	12.3275	12.2415	11.8265	13.0514	12.42	11.0052	11.1743	11.0148	11.4188	12.5629	11.5668	12.4909	11.3405	11.7643	11.8396	12.2149	12.2937	11.1967	11.3629	11.581	12.1923	11.9604	12.0123	12.4806	11.1951	11.8407	13.7386	12.179	10.8306	11.8819	11.5825	12.4574	11.8852	11.1243	11.5655	13.0322	13.0647	12.0375	11.9596	11.8394	11.8824	12.3822	13.5153	12.1217	10.8319	11.4401
CAPN5	12.2975	13.7186	13.742	12.4737	12.7227	13.746	12.9674	12.8924	13.1818	12.9197	13.6428	12.7683	12.5442	13.6458	12.6302	14.9697	13.0993	13.2975	12.5152	13.2973	13.6054	13.0332	14.1324	14.0924	13.5622	13.3343	13.8813	13.175	13.0908	13.6106	12.9504	13.4261	13.395	13.6844	13.5744	13.103	13.2647	11.6621	13.4665	12.737	13.0945	13.3445	12.4469	14.5251	13.2282	13.2514	13.5553	13.5998	12.9533
YKT6	13.538	13.1339	12.6329	13.7282	13.4214	14.2074	14.052	13.0574	13.8959	14.0117	14.0702	13.7825	13.8195	13.258	13.3371	13.8283	13.7865	13.3108	13.8765	13.3794	14.3328	13.5277	13.8124	13.1474	14.0086	13.6215	13.2583	13.9534	14.9236	14.6945	14.0435	13.625	13.9903	13.7536	14.3214	14.0807	14.3529	13.7363	15.2333	13.8172	13.5691	13.1226	13.343	13.6182	14.2662	12.8031	13.2748	13.4598	13.2269
ARPC5	16.6483	15.9668	15.9731	16.1411	15.3006	16.0314	16.1791	16.1269	16.2999	16.0362	15.9411	16.109	15.1966	16.0964	16.3529	15.4873	15.613	15.8464	16.5186	16.0361	16.0741	16.1524	16.2329	16.2825	16.1491	15.9509	16.2746	16.0778	16.118	16.4176	15.5168	16.2402	15.9046	16.5061	16.1107	15.4361	16.014	15.6194	16.9705	16.5427	15.6859	16.2661	16.1096	15.7605	15.4776	16.17	15.8047	16.1834	15.7987
DDX3Y	15.4429	15.4063	16.1774	15.6872	15.2839	15.4473	15.7149	15.5737	15.4523	15.4697	15.7743	15.4084	16.0736	15.8742	15.4918	15.7294	15.8812	15.8501	15.445	15.8526	15.3609	15.6366	15.4873	15.3789	15.7568	15.7062	15.2581	15.8793	15.3418	15.6996	15.9724	15.941	15.8103	15.4423	15.6817	16.2062	15.687	15.7579	14.8899	15.6883	16.4083	15.5442	15.8811	15.7608	15.7003	15.3382	15.8099	15.4805	15.8813
PDPK1	14.9629	13.9657	13.7224	12.7384	13.7315	13.3253	12.9487	13.1138	13.4221	14.0983	14.0113	13.1747	13.6386	13.963	13.7539	13.7726	14.5335	13.7204	13.8849	13.6944	13.3659	13.4272	14.1329	13.4753	13.8054	13.9026	13.74	13.8834	13.7429	12.8157	12.3484	13.5023	13.7532	13.1187	13.2721	13.9312	14.4497	13.4834	11.1823	14.3378	11.9027	12.509	13.9771	13.775	14.0955	12.9488	12.7475	14.0667	13.5935
TAPBP	14.5932	16.0669	13.8214	14.2702	13.4154	14.2633	14.6731	14.9767	14.0058	13.8316	14.1343	14.3434	14.7051	14.5065	13.8179	13.8158	14.9651	14.9103	13.3133	14.2113	14.709	14.3813	14.1984	13.6922	13.9795	14.0556	15.0698	13.7642	13.894	14.1172	14.0978	14.5887	13.9239	14.5509	13.5685	14.9772	14.3862	11.8663	11.5766	15.5251	15.0354	13.9089	14.4424	14.099	14.0913	13.9598	13.8885	14.8087	14.6408
CLDN3	15.932	16.4163	15.0353	15.3665	14.2506	14.8223	14.2285	13.7347	15.2553	15.0212	15.5246	15.3351	14.4825	15.68	15.2709	15.2922	14.5782	15.169	14.6095	14.7034	15.2565	15.4002	15.7405	15.8057	15.8582	14.865	15.8412	15.1068	14.4923	15.4904	15.1376	14.9882	14.5826	15.6171	15.186	16.2286	15.9059	15.8157	17.0638	15.6596	14.5073	15.1435	15.683	15.0459	15.4337	14.7554	15.9471	16.0003	15.0545
KCNN4	12.9839	15.5235	13.9372	14.5134	13.5287	13.9505	14.243	13.4038	14.2906	13.7134	14.8144	14.5029	12.7924	14.2049	14.8876	15.0588	13.3046	14.2686	14.4259	11.9927	10.9123	13.5884	13.2922	13.6302	13.0696	13.2202	14.8999	12.8386	13.81	15.8485	13.5286	13.8111	12.7787	13.1633	12.2259	10.57	13.902	12.0793	15.1118	14.111	14.1319	14.6644	12.0924	13.0303	13.5797	15.8089	10.9955	13.8208	14.1314
DHX15	15.3383	14.5494	15.5634	15.178	16.2288	15.3248	14.984	15.3641	15.192	15.727	15.4034	14.9434	15.5809	15.4102	16.084	15.8115	14.9714	15.3594	14.941	15.2224	15.3951	15.0869	15.1582	15.2554	15.3757	15.26	15.3485	15.7833	15.7136	15.0552	15.4899	15.7487	15.0266	15.4999	15.067	15.4245	15.8073	15.5021	15.7956	15.7466	14.4138	15.9298	15.4001	14.793	14.8646	15.0282	15.0117	15.3917	15.7745
RNMT	13.8884	13.8221	14.1076	14.4563	14.8999	14.5877	14.4339	14.4818	14.3411	13.7217	14.589	14.3768	13.7876	14.0031	13.9613	13.7578	14.448	14.2602	14.1704	14.3207	13.7828	14.5412	13.9201	14.7004	14.6702	14.1997	14.3557	14.0569	14.7085	15.0054	14.2651	14.791	14.6906	13.7447	15.3128	14.0229	14.1484	14.1518	15.0598	14.4498	13.9023	14.3437	14.1341	14.6287	13.7042	14.717	15.2089	14.736	14.3917
ZZEF1	13.5659	13.7483	12.5174	12.9132	12.3149	12.7758	13.6095	12.8594	11.5389	12.7911	12.1619	13.2513	12.8532	13.1958	13.9314	12.3407	12.7479	13.4133	13.0778	12.3641	12.4894	13.193	13.1646	12.9877	12.8656	12.7927	13.6242	12.7886	12.993	12.9025	12.6285	12.9475	13.1444	12.9231	13.0237	13.0315	12.641	11.0076	14.3448	13.6695	14.4406	12.3202	12.5855	13.1921	13.7405	12.8362	11.3969	12.4949	13.4636
SIPA1L1	13.0686	12.8938	13.5571	11.8751	13.3902	13.6101	13.7951	14.9164	14.0525	13.0359	11.2983	12.1765	10.2296	10.9833	12.2437	12.9706	13.3273	12.9012	14.7645	11.7966	13.4318	13.1814	13.385	14.0814	13.3191	13.6306	12.3853	14.8779	12.0096	10.7955	14.0266	11.8171	12.7074	13.4134	12.8853	12.7809	11.7022	13.5204	10.358	13.2547	11.6515	14.2446	13.025	13.1855	13.4067	14.0145	13.5714	11.4125	13.671
CYB5B	19.0503	17.2847	16.8881	16.725	15.6476	16.3404	16.1747	16.1022	16.5885	17.0754	16.9358	17.0645	16.4904	16.1498	15.9212	17.1397	17.4462	16.6928	17.0688	16.7408	16.4634	17.0777	16.4259	15.9527	16.8095	17.7131	17.3941	16.4442	16.0506	15.9755	16.5331	16.0429	16.1834	17.2232	16.9588	15.8275	17.6724	18.34	17.1635	17.4858	16.7649	16.7366	15.7447	16.5428	16.2152	16.2642	16.7994	16.7581	16.6283
PRPF4	13.4979	12.6757	13.0345	13.866	13.6592	13.6965	13.6551	13.5	13.3262	14.0129	14.0797	13.0934	14.5761	13.9954	14.2872	13.9251	13.8879	14.1017	13.909	13.6662	14.1332	14.1043	13.704	13.6876	13.964	13.4239	13.5787	13.676	13.6524	12.5162	12.9406	13.0234	13.847	13.8333	13.7324	14.2937	13.6443	13.7173	14.719	13.177	14.7325	13.1879	13.2734	13.2334	14.6061	14.0238	13.5193	13.5512	14.1304
PHGDH	12.7322	14.566	16.8428	14.8688	17.3673	15.4454	13.571	14.658	16.1817	18.0618	14.9	16.8501	14.4796	15.2147	15.6599	15.467	15.3256	17.5775	13.8765	14.9783	16.9524	14.9623	14.3617	13.8241	16.4527	18.562	14.1814	16.8449	17.2929	15.0531	14.824	16.3317	14.0135	13.822	18.2101	14.0752	15.3559	15.4541	16.8566	16.3125	16.6108	14.3289	16.8837	13.7364	13.4245	14.8841	14.1626	14.1167	16.858
DYNC1LI2	14.702	13.0587	13.7309	14.2754	14.4713	15.3236	15.0348	14.2496	15.3069	15.8155	13.7127	14.8158	14.9775	14.6882	14.0667	14.9309	14.5952	14.3903	15.708	15.0726	15.5536	15.1134	15.8235	15.3607	14.8544	14.1749	15.5173	14.9528	15.2466	13.8097	14.7891	14.1783	15.4855	14.8612	14.8006	14.7106	15.1941	15.6682	13.5942	13.6064	13.404	13.8529	14.5346	14.286	14.7798	15.0988	14.8103	14.8314	14.3457
PSMD3	15.7532	15.8795	16.3067	16.2983	15.9391	15.6651	15.7233	15.9916	15.891	15.7399	16.0428	15.6975	16.3038	15.7634	15.7447	15.8517	15.3992	15.8204	15.5954	15.9748	15.6417	15.8347	15.5718	15.4817	15.5668	15.8847	16.2458	15.8089	15.8222	15.9603	15.5639	15.7884	15.7236	15.8092	15.809	16.2363	15.6263	15.4627	16.6294	15.6389	16.6378	15.7307	16.0268	16.1904	15.989	15.721	15.7774	15.9123	15.9212
PAPSS1	11.8734	11.2792	12.2075	11.5178	11.0648	12.1407	12.3096	12.308	12.8741	12.8948	11.6726	12.1608	12.7113	12.4081	12.4575	13.2127	12.9024	10.8471	11.865	11.0981	11.8738	11.1126	11.8147	12.0284	11.8041	12.0712	12.4321	12.7527	12.6029	13.3146	12.5151	12.0221	13.0941	13.1606	11.6904	12.2407	12.3917	10.2854	12.1268	12.4993	14.1878	12.5765	13.7287	14.0745	11.9852	12.5856	12.246	10.5606	11.6759
ZW10	13.5581	13.5737	13.4991	13.5847	13.6093	13.8747	13.8954	13.9537	13.4515	12.9927	14.0022	12.5899	13.6645	13.0641	13.3536	13.8124	14.1417	13.2935	12.8759	13.861	13.5805	13.6271	13.686	13.871	13.652	13.6145	13.5768	13.9518	13.5084	13.1118	13.9623	13.1541	13.5902	13.56	13.4747	14.059	13.7203	12.8393	15.7663	13.571	14.1135	13.4183	14.7003	13.9375	14.003	12.3803	13.6606	13.6988	13.9063
SPINT1	14.693	14.9873	14.2407	13.9645	14.2317	14.7507	14.341	14.3472	14.7437	14.789	14.1667	15.017	13.0841	14.5898	14.8017	13.8349	13.9132	13.7605	14.3975	14.7	13.9067	13.2235	14.7497	14.7834	14.4236	14.2196	14.5395	13.6363	14.4026	13.7834	12.995	14.5734	13.9826	14.2114	14.5145	14.4948	14.3375	14.2001	15.7181	13.5237	14.4273	14.0117	13.8672	14.5312	14.2913	14.1011	13.9678	14.2417	14.2551
B4GALT5	13.9341	14.2366	11.233	14.1565	14.2846	13.2505	14.7122	13.7785	12.9936	14.6642	13.876	12.81	12.6772	12.1181	13.763	13.3892	13.5628	13.8894	14.0025	13.0783	13.2409	13.8156	15.1049	12.561	13.8609	14.0511	13.3015	11.4945	12.9245	14.9767	13.1623	11.9972	14.7903	13.6084	12.7542	13.2872	14.1911	13.2359	15.5321	13.8172	12.763	13.5287	12.7861	13.532	12.5397	13.5332	13.2005	12.2364	12.9141
SART1	13.9217	14.4616	14.3555	13.9263	15.1674	14.0278	14.0681	13.917	14.0799	13.9895	14.7997	14.5866	14.552	14.284	14.3855	14.6124	15.0459	14.2791	14.1241	14.5758	14.3753	14.2617	13.6638	14.0223	14.4905	14.2411	14.6108	14.3077	15.6332	13.7325	13.8144	14.5724	14.242	14.364	13.9266	14.0325	14.0668	14.1541	15.4612	14.2046	14.756	14.9313	14.2248	14.2825	14.7792	14.2881	14.2931	14.673	14.989
GPAA1	14.8255	16.0406	15.237	15.2889	15.4521	14.9362	15.557	15.1287	14.4683	15.3595	15.1413	15.0518	14.8701	14.9998	14.7222	15.4284	15.4017	14.9123	14.8317	14.7438	15.4096	15.2789	15.2774	15.2169	14.8709	15.0637	15.7557	15.0723	15.5415	14.9367	15.4914	14.3584	15.6518	15.0928	15.1967	14.6048	14.6272	15.5957	16.4946	15.0912	14.6299	14.4024	15.0968	14.9795	15.1066	15.6935	14.3768	14.8385	14.8051
TGFB1I1	13.0032	14.045	13.516	12.7906	13.5231	14.1443	14.5686	14.6297	12.917	13.7552	11.7526	13.2929	13.0198	13.1696	13.5517	13.107	12.6949	13.553	14.82	13.9518	13.8105	13.282	13.6451	13.6209	13.7388	13.3618	12.831	14.5601	13.7764	14.4225	14.1631	13.754	14.7367	14.4339	13.754	13.6419	12.5015	16.0212	10.4359	13.0778	13.8045	14.1375	13.1865	12.889	13.5583	13.4332	14.3694	12.5562	13.5333
AP5Z1	11.6257	11.3012	11.2024	11.972	11.4721	12.2844	10.6051	11.9105	12.2805	11.9403	12.9731	11.9278	10.9585	12.1077	11.3256	13.2823	12.0024	11.5813	11.7405	11.5434	10.7539	11.8896	11.733	12.2941	11.9406	11.1369	11.7318	12.1776	11.5639	11.7246	11.6695	11.0801	11.7469	12.0914	12.1013	11.8821	11.0781	12.9572	14.4803	11.4516	11.4886	12.471	11.4259	12.4959	12.0413	12.185	11.9975	11.9544	12.9789
HSPA12A	14.9081	12.0951	13.3657	11.4076	11.0938	12.5724	12.7126	13.3875	10.1994	12.199	11.7209	12.8549	11.689	12.5638	10.9083	10.2692	11.8828	12.1999	13.9399	11.1714	11.709	11.3361	11.4164	11.9643	12.5667	14.5895	9.87317	12.8398	12.0614	10.4975	13.0739	12.1729	13.2394	14.7398	12.7017	12.9615	12.6827	13.8207	10.2175	11.5713	12.9516	12.8301	11.9046	13.2121	12.4597	10.2968	14.3434	12.3193	12.2561
PPIP5K2	12.1991	12.4338	12.4868	13.2917	13.5565	12.9173	11.4837	11.6158	11.7614	11.9675	12.744	11.9197	13.4905	12.7255	13.459	12.4498	12.9343	13.4947	12.1416	12.3669	12.1613	11.2921	11.6847	12.1062	11.191	12.3383	12.2984	11.1947	12.5744	13.3032	11.1436	12.1532	11.694	11.8838	12.7464	12.9848	12.3685	10.8151	12.2483	13.1605	13.332	9.64199	11.8148	11.8968	12.5439	12.3505	12.586	12.5697	12.0594
MAP3K7	12.8093	10.398	12.762	14.0389	12.9335	13.1362	13.477	12.9601	13.7526	11.8826	13.7992	13.4089	12.7381	14.3501	13.3271	13.6136	12.9372	12.3483	13.4659	13.5089	14.131	13.7858	13.8861	13.7128	13.434	13.3674	13.3236	12.792	12.4772	11.8869	13.0979	13.8827	11.1889	13.8587	13.7461	13.6736	13.5559	11.3587	13.7483	11.7289	14.1305	13.2602	13.3107	13.1891	12.9565	12.9514	13.3062	13.1666	13.544
EEF1E1	13.5438	14.7555	14.5053	14.0524	14.2625	13.8849	14.2902	13.6536	14.88	14.0801	14.3663	14.3285	15.0221	14.4452	14.635	14.3545	15.256	13.9677	13.4028	14.8815	14.5259	14.5774	14.0597	13.5868	13.5442	14.4507	14.6306	14.3061	13.6384	14.2836	13.1495	13.8243	13.4118	14.3548	14.4891	14.2653	15.1761	13.306	13.1029	14.221	15.0077	14.3441	13.9298	15.0206	14.0387	13.8475	14.4459	13.9102	14.5664
HNRNPR	16.437	15.4168	16.0769	16.1611	16.3403	16.4262	15.8452	16.079	16.6313	16.6676	16.4411	16.2293	15.7523	15.8727	16.7229	16.0296	16.3835	16.6407	16.2261	16.5261	16.6077	16.5457	16.0506	16.3699	16.1732	16.3305	15.9179	16.7015	16.431	15.8275	16.1263	16.328	16.5694	16.3494	16.4843	15.742	16.0269	16.7832	15.9854	15.383	16.3597	16.5489	15.711	16.136	16.3429	16.2948	16.5108	15.7857	16.6579
PRPF3	13.5835	13.1332	14.0867	13.4205	13.6689	13.3973	13.1829	13.5901	14.2798	13.8664	13.6802	13.5913	12.8853	13.8628	13.9634	13.9698	13.2427	13.7245	13.5456	14.0199	13.7795	13.7462	13.2964	13.3748	13.4277	13.1924	13.5799	13.8629	13.2546	13.4156	13.5648	13.3552	13.6759	13.4981	13.3796	13.8061	13.74	13.3201	15.1675	13.6977	12.9101	13.0722	13.6664	12.9834	14.6036	13.3717	13.2559	13.7684	14.3719
TXNL1	16.6923	16.0764	16.1162	16.1579	16.2233	16.4945	16.2717	16.2776	15.8421	16.2805	16.4353	16.2907	15.4731	15.8486	15.9723	15.4788	15.307	15.8492	16.4486	16.1059	16.6119	16.4956	15.9556	16.5104	16.3866	16.4308	16.0352	16.1882	16.4067	16.152	16.5384	16.0882	16.0659	16.1026	15.8978	16.0406	16.1631	16.1852	17.1766	15.7994	15.5694	16.077	16.754	15.0568	16.1293	16.0364	16.7618	17.11	15.9187
TPD52L2	16.5371	15.6488	15.6461	16.1631	15.8985	15.8211	16.2794	16.1353	16.2107	16.389	16.9328	16.0591	16.2082	16.4986	15.9879	15.9832	16.025	15.2105	16.2143	16.6126	16.0151	16.1642	15.9012	15.594	16.1256	16.0977	16.4047	17.0987	16.0105	15.9197	15.6803	16.0818	16.027	16.7464	16.6053	15.8866	16.1004	17.0926	16.2611	16.0903	15.4246	16.0783	15.3734	15.8582	16.2871	16.0282	15.8516	15.8425	15.7214
EMC8	12.997	10.7472	12.2156	13.1294	12.3841	11.8633	12.5643	12.4717	13.0573	12.5661	13.0807	13.3182	11.281	13.1973	11.7174	12.5444	12.5109	12.2831	12.1045	12.8523	12.3274	13.1981	13.2309	12.5657	12.8752	12.5754	13.4065	13.0275	13.0849	10.3358	12.3727	12.8629	11.3117	12.7533	13.6858	12.9392	12.9602	13.7738	9.36525	14.1358	11.4559	13.2721	11.513	11.3321	10.8282	12.8941	12.9655	13.0895	13.059
FIBP	12.5017	10.8129	12.4606	13.0354	12.1554	12.6094	13.1165	11.7514	11.9118	12.7621	12.3889	11.3226	13.6361	12.3735	12.2184	13.045	12.62	12.5691	12.326	13.0738	11.886	12.3482	11.9388	12.1226	12.1122	12.502	12.6883	12.5502	12.2337	12.9751	12.7932	12.1268	12.0988	11.7032	11.3115	12.1466	11.9272	10.5101	11.3056	12.9101	12.7446	11.9008	11.8733	13.9164	12.7263	13.2633	12.3433	12.0594	12.113
EIF4G3	13.9638	14.5955	14.8707	13.9878	14.6119	14.1504	15.0471	15.0603	14.5901	13.8653	15.0301	14.986	13.8365	14.3233	15.2328	14.7497	15.6132	13.7392	15.481	14.2225	14.5111	14.748	14.7604	15.0103	15.2314	14.0532	13.3613	13.776	14.5919	15.221	15.081	14.5062	14.7568	14.3511	15.0541	14.6722	14.5141	14.4284	17.3861	14.1165	14.9837	14.3717	14.5808	14.791	15.4261	15.299	15.7365	14.0039	14.157
PPIH	14.7711	15.0859	14.5164	15.2083	15.2156	13.7401	14.2109	13.7425	15.2481	14.8784	15.1918	13.9264	13.4063	15.7988	14.8086	13.8454	14.3589	14.7854	15.3787	15.3465	13.9714	15.5141	16.3697	15.3219	15.0198	14.9228	14.734	14.662	14.6472	14.6571	13.8236	14.6215	14.2741	14.9018	15.0376	14.7286	14.0529	14.3492	13.1952	14.2581	14.2304	14.0201	14.3021	14.5379	13.5853	14.1317	15.852	14.5403	15.4123
MGAM	13.0814	13.8856	13.2529	12.0466	14.4635	13.4059	12.6065	13.2774	12.7265	12.9666	12.0699	13.5678	12.9449	11.5664	12.4987	10.935	12.4974	12.7678	12.6984	13.359	12.8617	13.3892	12.0158	12.1467	13.3637	12.4254	12.8645	13.1828	12.8805	15.0303	13.0918	13.3196	13.9098	13.081	13.4728	12.9703	13.3998	13.8736	13.5067	14.3001	14.6798	13.4544	11.1222	13.1936	12.9309	13.7909	12.9612	12.1767	12.7068
HTRA2	11.2496	12.8364	11.4799	13.0625	14.4028	15.5164	14.4169	12.1922	14.1386	13.4991	14.3945	13.0443	14.2807	13.1902	12.2098	14.1505	15.1556	14.2566	15.7235	12.7801	15.009	10.8199	13.0433	13.2989	13.3087	12.8662	13.3931	14.5254	15.8079	15.2218	14.1356	11.9314	14.9753	13.8146	14.6321	13.3707	12.8443	15.5733	11.935	10.2778	14.2967	14.4622	9.33032	16.3392	13.8503	13.2447	12.9363	11.126	13.4085
AKR7A2	13.5457	13.9784	13.0463	12.9422	14.525	13.9655	13.4869	13.4819	13.3756	14.3786	13.2989	13.5704	13.5973	12.4229	12.964	13.318	13.9833	13.6613	13.0897	13.9154	14.1893	13.8197	14.175	14.2251	13.565	14.0481	12.5667	13.3166	13.469	13.9959	13.7835	14.6727	13.4525	13.366	14.5953	13.1002	12.8324	13.8446	11.4192	12.9847	12.9238	14.9214	13.7552	14.5109	13.8343	13.8203	14.4278	12.613	12.5574
PROM1	13.5602	14.8052	15.2546	11.9812	11.9069	13.2054	12.753	12.4869	14.1582	13.801	13.7969	13.8805	12.3272	14.0383	14.2995	13.7822	14.7096	14.2	14.478	12.5497	12.7101	14.1669	11.8427	11.1724	14.0368	14.2639	13.566	12.5295	13.6772	14.8806	14.5357	13.9231	13.7303	13.8758	15.022	13.0944	14.0175	13.3886	17.4978	11.619	12.1137	13.5637	13.1021	10.9343	11.1902	15.7362	13.3574	13.5596	14.1643
EPB41L2	15.6208	16.5718	16.255	16.2434	15.4961	16.6507	16.2546	15.2033	15.7991	15.2934	15.8557	15.693	16.2886	14.0431	16.5964	16.7994	16.4222	15.4278	16.2634	15.5655	16.7355	16.0639	16.44	17.1314	16.2407	15.2765	15.1697	16.4487	15.7806	14.526	15.7907	15.0141	16.3443	16.0058	16.3564	16.7242	16.1005	14.8225	15.0229	14.8551	16.4484	16.4036	16.1944	16.2972	16.6222	14.7054	16.2976	16.2968	15.8614
TGOLN2	11.4458	13.8821	12.6729	13.2963	12.282	11.9233	11.0595	11.7653	12.8456	11.7821	12.6559	13.4061	12.0725	12.9794	11.9936	12.6816	12.6644	13.3906	12.3386	12.6703	12.4466	12.9249	13.5698	12.7211	12.0487	12.0412	13.6285	11.88	12.4651	12.872	12.1721	12.7006	12.5902	12.5946	12.7689	12.283	12.721	12.0138	11.1656	13.1805	12.105	12.855	12.3278	13.1014	12.693	11.4899	12.1494	13.1865	12.3067
B4GAT1	12.6676	12.1094	10.8944	11.0446	12.6582	12.7092	11.857	11.0404	12.6209	13.7649	14.3111	11.9291	12.8967	12.5096	13.3074	12.2307	11.4875	13.4925	11.9971	12.5032	13.267	12.7727	11.9909	11.3073	12.2382	13.5522	13.1156	13.6293	11.8399	12.8437	11.2795	12.7443	12.9629	12.7867	12.876	11.7898	12.3056	12.3227	9.26007	12.3156	11.6795	12.4686	11.5653	12.5511	12.1575	12.3076	11.6092	13.287	12.5079
WIPF1	12.4462	12.954	14.8434	13.556	7.998	13.8149	13.8601	14.1678	13.7997	12.8015	13.3901	14.3139	12.3402	13.8413	14.4868	13.5158	14.5307	13.9189	13.974	14.4869	13.2243	13.9775	14.2809	13.6502	13.9784	13.3522	13.8404	14.1106	13.458	14.4699	13.5119	13.7981	13.4939	13.897	13.7237	13.8061	13.0691	13.9579	11.4083	13.8933	7.07937	14.1598	13.4923	12.0925	12.4766	14.0821	13.8901	13.7578	13.4434
ATP8B1	13.8718	13.3746	13.2081	13.6108	13.24	13.9474	13.3033	13.5431	13.9456	14.0109	13.9043	13.676	13.4197	13.7141	14.1237	14.384	13.8225	14.7149	13.9753	12.5864	14.3563	13.857	13.9164	14.1954	13.9966	13.4945	14.9649	14.0712	14.0134	14.3691	14.0441	13.885	13.6822	13.9427	13.9467	13.7073	13.9251	13.9732	15.6541	12.9621	13.5812	12.8806	13.8491	14.4702	13.5121	13.3035	14.0775	14.1187	13.7997
CA12	12.2723	12.708	12.1621	11.389	11.0198	13.3498	12.527	11.4624	11.7574	13.3228	11.2016	12.1573	12.6605	11.0189	8.47512	11.4092	11.1451	13.2803	12.4654	11.3375	12.5689	11.7541	13.0578	13.5378	13.1604	13.1218	12.9045	11.479	12.0448	11.4336	13.7053	11.5087	12.1246	11.3431	12.7451	11.9774	13.1683	11.0164	10.4518	11.0588	14.1805	12.9757	12.7205	13.2732	11.4479	14.2066	11.0001	11.8384	12.4706
DENR	14.6813	13.1973	14.3667	13.2977	12.3769	14.4912	14.1136	13.9686	14.5281	14.3087	14.3861	14.575	15.1969	13.9488	14.4464	14.2666	14.7922	14.8433	14.5326	14.7826	14.0251	13.9407	13.366	13.881	14.0678	14.2304	13.4415	14.668	13.8887	13.0082	13.6683	13.7665	14.1743	14.0315	14.3842	14.0449	13.9652	14.0575	16.0533	12.8952	15.2434	13.7211	13.5166	14.8414	14.6238	13.967	13.8151	14.0366	14.3157
XPOT	14.5325	14.5212	14.7461	14.1812	14.6042	14.3465	14.3956	14.3101	14.9575	14.5747	14.3644	15.1013	14.5846	14.7527	14.6598	14.173	14.3459	14.5174	14.4318	13.875	14.3676	14.5966	14.2004	14.0493	14.3404	14.9359	14.7449	14.4384	14.2743	14.5005	14.4111	14.3803	14.0645	14.7866	14.6838	14.37	14.4671	14.2641	16.5324	14.9423	14.3316	14.2143	14.6605	14.0212	14.2031	14.214	13.7152	14.76	15.0573
DNPH1	12.2664	12.4234	11.3194	11.2389	12.3762	11.4344	11.7792	11.676	12.4653	12.2011	11.5424	11.6029	14.3839	11.1974	11.8528	11.8373	13.3781	12.4959	12.0879	12.4445	11.9687	11.7856	10.8371	11.1741	10.8473	10.9532	11.7308	10.8221	11.3536	13.8885	11.5029	11.2691	11.9047	12.4068	11.2424	12.1444	12.1169	11.9984	9.94071	11.8426	12.8396	12.0155	11.5034	11.6789	11.8121	12.7106	11.7565	11.4775	12.0845
TIMM44	13.8985	14.354	15.5952	14.3472	14.8814	15.0662	14.2336	14.5927	15.0752	15.0434	15.2255	14.9728	15.0639	14.6852	15.6511	15.78	16.1661	14.56	14.8375	14.9039	15.2663	14.7752	15.4722	15.1458	14.9772	14.8728	14.6095	14.8659	14.9807	13.9803	15.0666	15.327	14.9038	14.7093	14.7744	15.1542	16.135	16.2469	15.3341	14.6329	15.2768	14.8098	15.2024	15.1039	15.3999	14.045	15.3479	14.9976	15.308
TRAPPC3	13.0372	13.317	13.3356	13.2596	13.7775	13.1686	13.7316	13.6282	13.336	12.9078	13.0389	13.0627	13.9338	13.8327	13.3269	13.3219	13.6426	13.159	12.9948	13.5898	13.0259	13.1665	13.1406	13.0126	13.339	13.1824	13.5881	13.1375	12.8953	13.9008	12.864	12.8179	13.6916	13.1553	13.6784	13.3183	12.6191	13.6625	11.1644	13.4704	11.7852	11.4727	13.5382	13.8647	13.9021	13.9864	13.6589	13.1531	13.3791
CHMP2A	12.7559	13.1521	12.9879	12.8974	12.3997	11.5251	12.0924	12.4405	12.5273	11.8203	12.8207	13.0121	12.5418	12.8154	12.4434	11.9077	11.9582	12.7415	12.9682	12.8644	11.6863	12.5895	13.0406	13.117	12.7565	12.7177	12.9287	11.9433	12.0733	12.8059	11.5868	12.3237	12.3918	12.9133	12.7584	11.914	10.0322	11.2281	10.5478	12.5224	13.1707	12.6016	11.6293	12.7501	12.8578	13.6596	12.9567	11.7887	12.6436
NCK2	12.2279	9.53163	11.362	10.4351	11.2293	11.5239	11.3546	10.6814	11.9519	11.6995	11.0755	9.76218	11.0208	10.9311	11.5942	10.6706	11.2419	10.9346	10.9214	11.6454	10.7143	11.2211	11.0005	11.4801	11.2611	11.2203	11.7845	10.7835	12.0865	10.7627	11.2882	11.1555	11.846	11.9577	11.6319	11.616	11.131	11.9058	10.478	11.5735	12.4944	10.8006	11.562	11.2517	12.2955	11.3867	11.8381	11.3709	11.4145
PLRG1	12.7295	12.9182	14.2918	12.8327	13.2642	12.1084	12.1188	13.1935	13.8167	13.5668	13.1583	13.5158	13.6213	13.5302	15.0654	13.4021	14.1202	14.2499	12.9649	13.508	14.326	13.3601	13.158	11.6748	13.4396	14.0345	12.9207	13.7768	12.6175	11.7359	12.873	12.9769	12.6555	13.3948	13.6177	13.3149	13.4026	13.3324	13.5985	11.8902	13.7394	12.7815	13.9831	13.5061	13.3713	12.9413	13.4933	14.0525	14.0182
ZNF207	14.4673	13.3072	14.6197	13.8597	12.9446	13.2125	13.7846	13.8093	14.0959	13.6432	14.6027	14.2091	13.1668	14.7666	14.2212	14.6195	12.7397	14.1397	14.4936	14.3765	14.4045	14.0237	13.9117	14.1947	14.2465	14.3902	14.3083	14.4036	14.3993	14.3348	14.071	14.5542	13.8938	13.7974	14.137	14.085	14.5147	14.0959	11.1856	14.3105	12.2479	14.7684	14.4859	12.8016	13.1011	14.0457	14.3399	14.3868	14.3911
NDUFB5	13.1431	15.0861	15.3169	14.8548	14.9229	13.9319	14.5192	15.2042	14.7243	14.6095	14.8303	14.6462	15.7457	14.5301	14.7619	15.0805	15.9055	14.395	14.1411	14.7248	14.2258	14.2041	14.0022	14.7252	14.6921	13.8928	14.5449	14.9562	13.199	14.3778	15.2835	14.5622	14.5768	13.5835	13.0959	14.7906	14.4149	14.4016	10.5299	14.5582	15.1062	14.8303	15.1264	14.9804	13.9036	14.0373	14.4531	13.7268	13.997
NDUFB3	12.2309	13.7325	12.8425	13.5275	12.4815	12.687	12.8943	12.6508	12.5699	12.8712	13.7043	13.5885	13.2231	13.1624	12.3846	13.1702	12.3542	13.5835	13.0778	12.8683	11.6473	13.0659	12.8853	14.0713	13.5167	12.28	13.4181	13.6602	13.0747	11.7073	12.463	13.5328	13.228	12.9724	12.5382	13.0454	13.5566	12.6928	13.5468	13.1454	12.2925	13.3837	13.2977	12.7586	12.8343	11.9166	13.4924	13.2651	13.6573
GET3	14.5097	14.0784	13.8358	14.1594	15.0898	14.8511	15.0044	14.6999	14.679	14.8753	14.5785	14.1742	15.8384	14.6611	14.8451	14.994	15.3237	14.0259	14.968	14.9035	15.6513	14.7711	15.0174	15.1015	14.4415	15.3563	14.2812	13.178	15.3147	14.6689	14.9031	14.6404	13.9812	14.6127	14.9105	15.5526	15.3721	14.4045	14.2097	13.9777	15.8434	14.6621	14.515	15.2318	14.8052	14.3634	15.5688	15.6961	15.0535
BUB3	14.6552	15.7703	15.3544	15.1726	15.7526	14.8464	14.8261	15.0804	15.1254	15.0469	15.4337	15.0307	15.4432	15.69	15.5626	15.1041	15.408	15.4495	14.964	15.2619	15.0173	15.4439	14.9112	15.1084	15.1455	15.2646	14.7898	15.0699	15.2867	15.082	14.8413	15.4428	14.5246	15.2203	15.3041	15.1458	15.2673	14.7538	14.6909	15.5102	15.6404	15.6791	15.3054	15.1093	15.8031	14.5283	15.443	15.1358	15.6055
SULT1B1	13.7946	11.1368	12.4442	14.7752	11.7827	15.8563	12.2502	11.3166	13.0738	14.9027	12.5503	13.0527	11.6091	12.1856	9.35717	10.9912	12.2827	15.4205	13.8753	11.7439	12.5142	12.0715	15.8144	15.5853	14.1161	12.814	13.6019	9.91715	14.9378	12.7352	12.6043	11.0171	12.8898	14.0961	13.2107	12.3077	14.8953	12.0954	15.2364	12.1793	11.8146	9.87228	12.6485	14.7314	11.9547	13.9076	12.3642	13.9267	12.0966
ACTN4	18.4647	18.1703	18.4643	18.2665	18.2803	18.0913	18.5347	18.6545	17.9065	18.7574	18.1076	18.0305	18.4728	18.4367	18.37	17.9132	18.332	18.0028	18.6435	18.2602	18.2153	18.0841	18.5021	18.2869	18.3178	18.3782	17.7543	18.3603	18.1769	18.4344	18.521	18.0142	18.4498	18.3434	17.9107	18.434	17.5231	18.474	17.3934	17.9194	18.1929	18.225	17.7649	18.6263	18.6705	18.1912	18.5738	17.6934	18.1161
GSTZ1	12.3154	12.3724	11.1791	11.7296	12.9043	12.3354	12.3296	12.389	12.7183	13.0508	10.9315	12.1006	12.4773	12.5748	9.37608	11.5138	11.7315	11.6514	11.9017	11.8205	11.8076	12.0746	11.9988	12.1253	11.7639	11.9198	11.7284	12.4405	11.9237	10.2368	13.1339	11.7534	12.5903	12.3001	11.705	10.4984	10.6101	10.5052	9.71638	11.8553	10.7806	11.8364	11.6777	12.6661	12.5988	13.7083	13.5435	11.9328	11.2375
BUD23	11.9075	11.2272	10.2772	11.8265	12.3752	11.8547	11.2151	10.536	11.6237	11.7179	12.5982	11.6283	11.0769	11.5196	10.2674	11.5201	11.6278	11.8576	10.3582	11.8761	11.1087	10.4308	11.7811	13.8452	11.5942	12.6335	12.0149	11.5936	12.0518	10.2267	12.9153	12.2085	10.1343	11.2471	12.2158	12.1982	13.1925	10.1093	12.4306	12.7762	10.1869	12.0354	12.5631	11.5748	11.8582	11.525	11.6181	12.7096	12.2871
GATC	12.2509	11.5812	13.1869	12.4986	12.2331	12.7102	11.6539	11.8981	13.151	13.2803	13.2467	13.4014	11.2036	11.7937	12.2936	12.2869	11.9633	12.8511	13.0691	13.2359	12.8847	12.8898	12.8883	12.6609	13.2311	13.2775	13.0054	12.2991	13.6298	12.245	12.9743	12.9273	11.7553	12.8498	13.376	12.506	13.5335	12.5466	10.2517	12.0307	11.2042	13.1377	12.7983	11.3512	12.2616	11.274	12.7492	12.9877	13.2307
HTATSF1	14.4017	14.2027	13.1228	13.6339	12.7506	13.726	13.7354	13.0694	12.8072	13.2424	14.2045	13.7613	12.9174	13.1054	13.5364	12.7761	14.1956	12.7669	12.8692	13.7463	13.3882	13.5564	13.9774	12.7848	13.4431	13.143	12.6878	13.3073	12.6798	14.3345	13.7642	13.1067	14.7573	12.6875	13.0474	12.8026	12.2503	13.7417	16.617	12.9814	13.6698	13.7318	13.201	13.4895	14.062	13.3433	12.2172	12.9399	13.1739
CYTH3	14.3442	13.8252	14.8122	14.3653	15.2528	14.7029	14.5519	14.8441	14.056	14.8027	14.3049	13.8447	14.6634	14.6076	14.4105	14.0307	13.2579	13.5434	14.3875	14.1626	14.4883	14.1922	13.2371	14.5631	14.4317	14.3686	13.733	13.8785	14.1551	13.7631	14.759	14.7067	14.6565	14.6147	14.3484	14.3841	14.1363	12.9354	10.5885	15.3558	13.2001	13.8624	12.8511	14.9886	14.6968	15.1409	14.4361	13.6824	13.4909
AP1G1	14.971	14.6223	14.1555	14.6963	14.3762	14.4603	14.3127	14.0705	14.2804	14.602	14.8867	14.1547	14.4922	14.8598	14.5471	14.5077	14.9255	14.9328	15.1089	14.129	14.5498	14.9098	15.1719	14.9071	14.9697	15.068	14.8181	13.9586	14.5374	13.8712	13.9319	14.0863	14.4326	14.5064	14.7506	14.5635	14.4972	14.3421	15.6672	14.0258	14.9096	14.8156	13.7547	14.9537	14.5182	14.2359	14.5312	14.4858	14.0369
STX6	13.5808	12.6477	13.9432	13.7966	14.2502	13.9052	13.8129	15.2698	14.7965	15.4615	14.3035	13.7788	14.83	15.1673	14.7409	15.1822	14.1408	13.9537	15.1103	13.3931	14.1366	13.8914	13.8118	14.203	13.9936	14.7722	14.9875	14.9839	14.0743	12.6887	14.3412	15.1191	15.0209	14.4701	13.6263	13.5711	14.3697	14.8051	17.9816	14.0869	14.3247	13.166	15.1791	13.3433	14.6844	15.4205	14.2006	14.6938	15.7538
SYNGR2	15.4155	15.2112	15.2693	13.7267	13.8001	14.7444	13.4566	14.4049	15.388	14.7211	14.6495	15.2839	14.5094	14.2732	14.9805	15.1687	14.3013	14.5887	14.1544	14.2182	14.9353	15.2774	15.0809	15.0388	14.8782	14.5413	14.6165	14.2445	14.3362	13.959	14.8351	14.5002	13.825	14.6346	14.4496	14.5934	15.2246	13.5783	15.9953	14.5439	13.898	13.0494	15.1768	14.667	13.9641	14.3361	13.9665	14.4651	14.921
SGTA	14.3404	15.449	15.0627	13.9304	13.8998	14.0137	14.8363	13.8214	14.1468	13.1601	14.5465	14.0736	13.458	14.3895	14.7734	16.0824	14.4683	13.272	13.2698	14.2832	14.4972	14.2862	13.8494	13.9762	13.8724	14.1002	14.6781	13.6192	14.0721	13.3775	13.9741	13.1014	13.4992	14.0417	13.4841	13.6972	14.7662	15.4889	13.9661	12.8995	14.326	14.8783	14.2743	13.1389	15.1225	13.1019	15.3703	14.6856	14.9604
ENSA	13.0902	11.8695	11.5548	11.7845	11.0941	12.1129	11.8084	11.8596	12.4679	11.7845	12.1604	12.6406	10.8834	12.6956	13.1897	12.3461	10.6578	12.3533	12.8698	12.1722	12.3981	12.7241	12.7264	12.7152	11.926	11.7035	12.3276	11.9856	11.2509	12.4391	11.7148	10.5518	11.7651	11.9691	11.849	12.2002	11.8295	12.1952	12.0644	12.3766	10.2851	11.7519	12.4132	11.4315	11.1575	12.345	12.435	13.2966	12.9438
SLC25A20	14.1488	14.2595	13.1871	13.4649	13.8965	13.2225	13.2797	13.1582	13.6146	13.5079	13.256	13.5165	13.3256	13.3057	13.3615	12.9504	13.58	13.2942	13.5604	12.7263	13.3416	13.56	13.4708	13.1624	13.4381	13.3274	13.1968	13.0272	13.1908	12.2672	13.6904	13.6746	13.3072	13.5509	13.4518	12.8911	13.6456	14.0219	15.0969	10.9801	13.9852	12.9387	13.7522	13.515	12.9686	14.4236	13.4946	13.6183	13.3636
NARS1	15.1216	15.5813	15.608	15.7339	16.3514	16.0446	15.7047	15.8057	15.1131	15.652	16.1272	16.1026	16.2576	15.1743	15.0846	15.4563	16.2713	15.0016	15.2504	15.3604	15.7991	16.1745	14.9135	15.8371	15.8119	15.7701	15.1964	15.5088	16.2724	15.8171	15.6552	15.9904	15.3586	15.442	15.5149	15.6585	16.1416	15.5484	15.4046	15.4688	16.4764	15.0757	15.9657	16.427	16.5582	16.0352	16.2603	15.564	14.9693
MYO1B	14.3127	14.8088	15.3819	15.2446	14.9545	15.0821	15.48	15.0722	14.7742	14.9848	14.9328	15.0401	14.9762	14.9479	15.9252	15.603	15.2442	14.9063	14.4584	15.079	15.4203	14.9899	14.7203	15.0691	15.0044	15.08	14.9478	15.4023	15.7928	15.333	15.2943	14.9047	15.5979	14.8446	15.5697	15.12	15.1786	14.3882	15.1363	14.8955	15.1432	14.7545	15.4842	15.6255	15.4909	15.3211	15.3033	14.8913	15.5991
NUDT21	15.2868	14.7217	15.4904	15.1108	15.5118	14.9427	14.8055	14.8703	15.665	15.2082	15.6369	15.2848	15.3619	15.5549	15.24	15.7631	15.7344	15.531	15.103	15.7094	15.0388	15.3769	14.9204	15.1927	15.3707	15.4414	15.6492	15.7508	15.6326	14.9289	15.0563	15.4184	15.331	15.2538	15.2849	15.3747	14.7977	14.381	15.7542	15.313	15.6307	15.1031	15.5713	15.4501	15.1202	14.5497	14.9596	15.5626	15.6911
LANCL1	14.4337	14.6997	14.5551	14.488	15.2006	14.5977	14.3342	14.6908	14.5159	14.4466	14.9903	13.9774	14.8142	14.6432	14.214	14.8662	14.2107	14.0756	14.6078	14.0906	14.9644	14.6235	15.0337	15.2179	14.8028	14.92	14.12	14.7959	14.7152	14.75	14.154	15.1373	14.9427	14.5082	15.2368	14.4562	14.6252	15.3859	14.6298	14.7667	14.4295	13.8482	14.3742	14.2023	14.6958	14.5529	14.9201	14.1764	14.2473
STRN	13.1565	12.3875	13.2736	14.3155	14.3209	14.0835	14.1483	14.0264	14.466	13.8947	14.26	13.9435	14.5533	14.5619	13.8713	14.3026	14.3917	13.853	14.0795	14.6564	14.4863	14.39	14.297	14.0594	13.7605	14.5817	14.6943	13.9538	14.2488	15.2449	13.9122	13.5712	13.9916	14.7549	14.2589	14.7315	14.327	13.9975	10.5726	13.2868	12.4305	12.5801	13.8227	13.9227	14.8787	14.6387	12.9683	12.8352	15.2791
RRP9	14.7504	14.4201	15.1835	14.915	15.1389	14.7776	14.6164	14.8124	14.7163	14.8451	15.1479	14.6032	13.9635	15.3958	14.9002	14.8522	14.0731	14.6142	14.8418	14.5428	15.1528	14.857	15.0469	14.7874	15.0981	15.1303	15.0692	15.0174	15.0848	14.5504	14.8077	14.9093	14.0509	14.7276	15.488	15.0464	14.9954	14.7782	15.5934	14.544	14.5731	14.988	14.6792	14.7256	14.9178	13.7204	14.7766	15.07	15.2351
AKAP8	13.2531	9.51461	14.0948	14.5979	13.5007	13.3691	13.2577	12.7628	14.9366	13.7846	13.754	14.587	13.258	14.334	15.2865	14.5217	15.1458	15.8146	13.3574	14.7341	14.227	14.8794	14.6418	13.5656	15.1822	14.3337	13.8828	15.4669	13.5055	14.7398	14.1715	13.0541	13.9894	14.1981	14.0548	14.3523	14.0172	15.7828	11.3318	14.2744	15.0492	13.4605	13.4969	13.6376	13.3644	15.5586	14.9934	13.7606	13.8351
GTPBP6	12.0088	11.7883	11.7584	12.1302	10.604	12.2902	9.47855	10.0765	11.1406	12.0543	12.8483	11.1493	10.0693	12.5765	11.6138	11.9424	11.6435	12.5254	12.7325	12.2897	12.3107	11.6166	13.5302	11.8197	12.1011	13.0602	10.5296	12.4722	13.0148	11.0184	12.1783	10.8921	11.7009	12.316	13.3333	11.9724	13.8746	10.8879	11.7779	10.2474	10.6613	12.7777	12.0488	11.3774	10.6844	11.4486	12.4917	12.5967	11.0375
IDH3B	12.8092	13.13	12.4025	12.7995	12.9483	12.2576	12.2116	11.8655	12.5958	12.4352	12.8677	12.94	13.2157	12.0233	12.568	12.6894	13.6114	13.3676	12.6774	12.8467	12.2964	12.5436	12.712	12.9679	12.734	12.4434	12.3512	12.4081	12.8772	12.4396	11.9793	13.2079	12.3875	11.6087	12.7507	11.9197	12.9912	13.5309	14.2026	12.6209	13.8492	13.2649	13.0533	12.7843	12.9337	12.4678	12.5891	12.7704	12.4773
NRDC	15.641	14.7184	15.4401	14.8801	15.1654	16.4956	15.2308	15.3415	14.7928	15.286	15.1963	15.0109	14.7531	15.0835	15.3121	15.3623	15.2648	14.5892	15.4104	15.1436	14.9673	15.2916	15.8195	16.1649	15.343	14.79	15.2697	15.2231	14.9701	14.8916	15.5563	14.9991	14.4204	14.4974	14.9325	15.3986	15.1272	16.4509	16.159	13.7588	13.865	14.6442	15.4962	15.3278	14.8002	14.9222	15.3232	15.3698	15.117
CALU	16.8914	17.0468	16.0206	16.125	17.0444	16.2546	17.4316	16.1931	16.9736	16.9463	16.2693	17.0717	17.9477	16.1184	16.5043	16.5892	16.6046	16.4235	17.2038	17.2378	16.2619	15.9455	16.2167	15.8951	16.1037	16.7272	16.7856	16.9217	16.1955	17.319	16.724	16.8462	16.8406	17.4382	16.915	15.8495	16.4382	16.5953	16.6594	15.7844	17.2906	17.795	17.0249	16.5649	17.3871	16.5163	16.6806	16.4867	16.7631
AHCYL1	13.4718	14.0767	11.3483	13.2487	12.2917	13.4068	12.2686	13.5558	12.7357	12.7469	11.7012	13.3273	13.7299	12.0447	12.8021	11.8105	13.0531	12.545	12.0078	13.3948	13.2344	12.9329	13.203	12.9741	13.3845	11.6345	13.2239	12.652	12.4654	13.1806	13.6173	12.8001	13.272	12.8975	12.6823	12.8781	12.8193	13.9042	14.5186	12.3301	12.9367	13.4125	13.1462	13.8554	11.322	12.8417	13.5652	13.1357	13.5319
ORC5	16.1294	14.4538	16.5169	17.921	17.1535	15.6559	17.7005	16.9393	16.4041	17.0014	16.5062	15.6418	17.4972	15.4753	17.218	17.3253	15.0781	16.8903	16.9293	15.7579	16.9395	16.5766	16.7364	16.753	15.9037	16.7176	15.9589	15.9109	16.4368	14.746	16.3348	14.2636	17.2637	16.4481	16.0721	17.7055	15.4156	17.6978	15.5492	16.7342	16.7657	15.1815	16.9499	17.1678	17.0388	18.1623	16.1139	15.7256	16.3282
NDUFS5	12.5074	14.0502	12.8968	14.2513	13.7977	11.5141	12.4793	13.4868	13.6902	13.1433	12.6392	14.2763	14.976	14.047	12.9036	13.8643	12.623	13.5209	13.6493	14.1844	11.8345	13.2769	13.6859	14.3809	13.8803	12.0276	14.1613	14.6374	13.3626	14.0349	13.1864	13.4918	12.9446	11.5495	12.2489	13.4466	12.3588	13.0603	8.91018	14.3525	14.8309	13.9979	13.6253	13.419	11.7165	13.5508	14.0083	13.1686	13.4786
ORC4	12.4416	11.0346	11.3524	13.1561	12.9162	11.2568	12.3185	11.7608	12.116	12.1265	12.7351	11.9988	12.1556	11.3983	11.0629	12.3581	11.5901	11.7907	11.86	12.0635	12.1782	12.273	11.8792	11.284	12.2801	12.3109	11.8909	11.8208	12.5634	10.4619	12.6203	12.0216	11.7094	12.632	12.4028	12.4405	11.3921	11.9511	12.0273	12.6807	12.6318	12.0639	12.4987	12.9936	12.2051	12.2068	12.5505	11.922	12.3672
PEX1	13.6908	13.236	13.3718	13.1134	12.606	13.2965	13.1391	11.265	12.1442	13.3962	13.3695	12.5397	11.7022	13.0988	12.217	12.3084	11.9524	12.9151	12.2494	13.2329	12.0826	13.1313	13.165	13.1134	12.7653	12.9257	13.1547	13.0116	13.0667	11.7039	12.6	13.2962	13.1059	13.0164	13.7314	13.2917	13.4433	12.971	11.3576	11.0503	12.1282	13.216	12.6385	13.8473	12.4652	13.803	13.5828	13.2328	13.092
RAD21	14.8334	15.774	14.2855	14.9457	15.3164	15.2214	15.7983	15.3829	14.8131	14.8903	14.1357	14.326	15.0851	13.9643	14.8789	14.2543	14.7511	14.1989	14.6943	14.5889	14.407	14.3797	14.7869	13.5811	14.7915	14.7562	14.6615	14.9599	14.581	17.1889	15.3354	15.4216	14.7141	14.2849	14.4266	13.8432	13.5906	14.6081	14.4163	14.7808	15.4983	15.4067	14.5702	14.7886	14.9409	14.9163	14.5953	14.1956	14.4721
AKR1B10	10.9308	13.2146	12.216	15.604	10.9779	14.0075	11.842	10.779	7.44316	13.9574	15.6954	11.9592	14.2158	11.2574	10.5589	12.1879	12.0167	12.8814	10.4504	6.32916	9.68645	11.6366	14.1162	15.8132	13.9851	12.7775	12.7686	12.1871	12.8306	13.499	12.0957	12.7096	13.0307	9.93986	12.4716	12.543	17.4108	10.7444	12.5351	13.2382	15.0289	11.6285	12.7614	13.695	9.90781	13.9747	12.2913	12.4021	9.47711
TIMM8A	14.6268	14.2787	14.5442	14.5857	14.4448	14.165	14.4692	14.238	14.2836	14.1623	14.633	14.3104	14.9506	14.7235	13.971	15.0296	14.6195	14.3428	14.2407	14.4257	14.1808	14.1854	14.0139	13.5928	14.2901	13.6572	14.0816	15.1605	14.3854	14.2247	14.8957	15.0825	14.6835	14.1457	16.0619	14.2505	14.4615	15.9587	15.5331	14.0773	14.4414	15.3005	14.3333	15.1297	15.7562	14.1499	14.4078	13.5147	13.9354
KALRN	15.2694	12.5703	11.9393	13.6441	11.6383	13.3648	11.743	11.3409	11.0918	13.4355	12.4808	12.1227	11.6711	13.5678	11.7046	12.4603	12.7497	11.6472	11.4139	12.9213	11.8579	12.4283	13.2702	13.0468	13.0155	12.4788	13.218	12.5585	12.6072	11.696	11.6562	12.7391	13.7071	11.9577	13.628	13.2658	13.7126	10.9265	13.8004	12.5204	13.4663	12.5774	13.1699	13.108	12.8765	12.9205	11.6182	12.1281	12.5081
DHX16	11.9516	13.6383	13.9942	13.7269	13.8817	13.2796	13.8835	13.8871	13.4727	13.5001	13.9129	13.4271	14.4323	13.5895	13.4647	13.3716	14.0301	13.5109	13.2701	13.5291	13.5075	12.7377	12.9371	12.9809	13.3902	12.944	13.3986	13.8578	14.0941	14.1537	13.7348	13.5695	13.5215	13.0046	12.6942	13.6586	13.443	13.0537	14.1222	14.5739	14.2475	13.5188	13.4925	13.8636	13.8509	14.0017	13.2518	13.249	13.6927
MED14	11.4538	12.7758	11.8249	12.8998	12.0585	11.4309	12.5339	11.934	12.3407	11.8598	12.1331	12.4026	11.9938	12.6526	12.1531	12.716	11.5828	12.1989	11.6156	12.6998	11.7995	11.8579	11.3781	11.7462	11.9082	12.1517	12.9851	11.5312	11.0157	11.3899	12.6295	11.7493	10.6667	12.0018	10.9209	12.3164	11.3081	11.7835	9.78809	11.7443	13.6162	12.7788	11.4856	11.612	13.1865	15.2389	12.2632	12.2452	11.9115
PRPSAP2	15.6688	15.1897	14.3179	12.9177	17.0318	13.8774	17.3196	16.6855	15.1975	16.039	13.5587	15.3895	13.8682	14.8131	15.9969	14.8404	14.5351	14.9513	17.7084	15.3067	14.8966	14.953	15.204	14.0022	15.1511	15.5669	15.9178	15.4443	16.2447	13.4726	17.8985	14.8013	14.733	14.87	15.3412	14.8018	15.187	16.6084	13.1272	15.9659	12.4817	14.8279	16.3677	14.3	15.1354	17.3751	15.744	15.7511	16.4454
SMARCA5	14.8406	14.6826	15.3142	14.6703	15.3234	14.5458	14.3494	14.9216	14.8774	14.7919	14.854	14.7373	15.4268	14.7584	14.7111	14.8275	14.4839	14.8992	14.6395	14.8409	14.308	14.9673	14.5809	14.5422	14.9272	14.7021	14.9613	14.7933	14.6823	14.0895	15.1001	14.5598	14.8015	14.4302	14.4191	14.8032	14.276	14.8683	14.7019	15.0684	15.2694	14.8563	15.0411	14.6097	15.0761	14.2166	14.8228	14.8762	15.0589
SPAG9	13.5598	14.144	14.4296	14.055	13.8215	13.6285	14.0187	14.2968	13.9036	13.6213	14.1655	13.7165	14.4616	14.0579	13.7911	14.2596	14.463	14.0618	13.872	13.9651	13.1902	13.9786	13.4181	13.7453	14.1959	14.3224	14.228	14.111	14.133	13.8624	14.204	14.0648	14.2864	14.1445	13.912	14.0116	13.9592	14.6048	14.0764	14.3475	14.7148	13.6161	14.3258	13.9553	14.0627	13.7797	13.6013	13.912	13.4797
URB1	12.3382	13.0014	13.7942	13.3322	13.4691	12.2717	13.2155	13.969	12.6487	11.7258	12.9498	12.9566	13.7261	12.7646	12.5047	13.532	13.4241	13.1157	12.7472	12.5279	12.6988	12.3437	12.8826	13.924	12.3892	12.648	13.0916	12.7361	12.0253	13.1172	12.7179	12.4871	12.3072	12.5324	12.7154	12.429	13.0043	12.9784	16.3843	13.1892	13.0405	12.8411	13.331	12.214	12.8435	13.2105	12.1626	12.3519	13.5034
SIPA1L3	13.2633	13.2884	12.9887	13.5862	13.0378	12.4658	13.3653	12.182	13.4906	12.7216	13.6652	12.3049	14.0871	13.5406	13.5085	11.6914	13.3541	13.4321	14.0604	12.5899	13.6542	14.1507	13.6567	13.7099	14.0637	12.9709	13.1581	13.2002	13.4409	12.4411	12.666	13.9535	14.0684	13.8032	12.3754	13.9527	13.8981	12.9052	10.3544	13.4244	12.5414	13.9416	13.1327	11.6626	12.9156	13.1189	13.8272	13.8881	13.4765
AQR	14.2858	14.3354	14.4943	14.4892	14.7943	14.4934	14.1831	14.3196	13.942	14.374	14.8416	13.4309	14.0089	14.2821	14.5566	14.5275	14.28	14.529	13.9235	13.8243	14.4531	14.5777	14.3395	14.1432	14.6219	14.4935	13.8703	14.6284	14.3389	13.9168	14.7207	15.162	14.5399	14.0626	14.4048	14.8842	14.7911	14.9199	16.7685	14.3931	14.3625	13.4651	14.5563	14.411	14.2844	14.1799	13.4831	14.6869	14.7172
OPA1	13.2539	12.7297	12.9556	12.978	13.1771	13.4223	12.7014	12.6314	13.5171	13.6252	13.8425	13.1089	12.9067	13.0544	12.5071	13.5166	12.8789	12.784	13.0367	13.2767	14.06	13.3031	13.8931	13.2962	13.187	13.5171	12.7988	13.6215	14.012	12.4923	12.9078	13.702	13.3006	13.3285	14.208	13.1312	13.8678	14.803	15.4438	12.5766	13.4369	13.1645	12.6522	13.1031	13.5499	12.7545	13.8677	13.0875	13.2858
KIF1B	13.4446	14.0634	13.9843	14.6095	12.9502	13.7755	13.8819	12.9435	13.5366	13.4955	13.8958	11.8756	13.9576	12.6165	12.3052	12.9238	13.9076	14.2816	14.2943	14.2507	13.865	12.895	14.2359	13.8549	13.5464	12.7533	13.7915	12.9264	13.5844	14.2504	13.4299	14.3803	13.329	13.5244	12.1611	13.6428	13.9307	12.0565	10.2475	11.7239	14.0337	13.8262	13.9401	14.3161	13.971	14.0078	11.8711	13.8595	11.733
KDM1A	13.3177	13.1256	13.5018	13.7242	13.7898	13.045	12.9724	13.5423	13.8089	13.0651	13.4882	13.3034	13.6048	13.6281	12.91	13.5762	13.4923	12.9677	13.4147	13.2294	13.3973	13.5248	13.0309	13.4366	13.3342	13.5907	13.033	13.3886	13.3961	12.8208	13.0869	13.4309	13.347	13.2058	13.4931	13.8988	13.389	13.3194	14.6897	13.7654	13.8225	12.9073	12.9447	13.7381	12.7707	12.8236	13.3265	13.6364	13.8944
TBC1D4	15.042	16.6973	13.5728	15.1575	14.0201	13.4575	13.7714	15.9964	12.6113	14.7258	14.6346	14.1563	16.0374	13.7577	13.6922	14.693	14.0175	14.2883	13.8918	14.236	14.0983	14.9527	13.8355	13.6755	14.3951	14.5865	13.9223	14.1103	14.2987	17.2554	13.7212	13.4175	13.6342	14.3999	14.2313	15.8148	13.9453	15.3967	15.634	16.1956	16.9167	13.9708	15.0911	16.0435	14.2266	16.303	12.923	13.7843	14.1091
PPL	14.5134	14.5971	9.3703	12.7506	14.0237	12.2802	12.0091	13.6024	12.5024	11.3978	12.3131	13.1247	13.5064	13.1581	12.7077	8.33215	13.5314	13.1927	13.019	11.9221	14.1965	13.1097	13.1463	13.0387	12.4617	12.2869	12.1105	11.2734	12.5438	12.9738	12.7883	12.4306	13.2408	13.7722	12.4389	11.5087	11.1304	13.7301	11.827	9.49156	11.6527	14.8507	10.1586	13.8121	12.2156	10.5755	12.1224	12.7156	11.0546
LY75	14.7089	15.7702	13.5598	13.1421	13.899	13.9938	14.0988	14.322	14.09	14.5342	14.2479	14.2715	14.0312	14.3277	13.8628	14.2554	14.2947	14.2009	14.6196	13.8938	13.8933	14.4198	14.0432	14.1021	14.3597	14.2761	13.8609	14.4685	13.8249	15.212	14.4523	13.7245	14.7686	13.5796	13.9655	14.6774	14.375	13.9085	13.8213	11.8999	14.8178	14.3074	13.189	13.8145	14.2039	15.1686	13.8998	13.99	13.6286
ACSL4	15.2315	16.293	15.9594	15.0345	15.248	15.0236	15.5455	15.6838	14.1242	15.2639	15.147	15.413	15.7641	14.9746	15.0259	15.1628	15.2885	15.0761	15.1186	15.2514	14.5797	15.0927	14.5504	14.1305	14.8919	15.0907	15.6468	14.9991	14.8375	15.0521	14.8819	15.6518	14.9947	15.6159	15.6591	14.8364	15.393	15.1774	14.9065	15.201	16.2509	15.1047	15.1439	14.9526	15.2504	15.127	14.8915	14.9755	14.8783
SNX3	15.0911	14.9505	14.8289	14.6639	15.0007	14.268	14.6383	13.7632	14.9679	14.1343	14.6686	13.8709	13.4421	14.8074	14.2971	13.4083	14.0656	14.3071	14.8205	15.4514	13.7674	15.0108	14.7425	14.5227	14.5575	14.6539	14.4385	14.6755	14.6885	14.7753	13.275	14.3273	14.9171	15.3026	15.2224	13.5961	14.1907	13.1877	12.5366	15.8964	14.2126	14.7981	14.7194	14.236	14.4186	13.5006	14.9424	14.6591	14.5224
STX10	12.2537	12.9576	12.976	13.7529	13.3086	12.8981	13.647	12.254	13.4163	12.563	13.3216	13.252	13.7518	12.3957	13.1668	13.9788	13.0821	13.6678	13.9079	12.8987	13.2147	13.9953	13.5917	13.0947	12.7912	12.9023	13.584	12.4072	13.3195	13.4534	13.7448	13.7207	12.7239	13.1603	12.616	12.2918	13.7746	12.2737	16.396	12.1428	13.5431	11.9127	13	12.8442	12.75	12.8614	12.8119	13.5499	13.4192
OGA	13.3913	13.6802	12.9105	13.0377	14.2338	12.9519	13.4816	14.3865	13.6756	13.226	13.375	14.1876	14.8173	14.0674	14.4344	13.9915	14.0507	13.9581	13.43	13.9496	13.7171	13.9889	13.499	13.8089	13.665	13.6298	13.8062	13.9279	13.6875	13.7168	13.7961	14.1925	14.007	13.8064	14.216	14.1276	14.4058	14.4439	13.6797	13.1774	13.5922	13.0701	14.0229	13.7291	14.8709	13.8147	14.3454	13.9854	13.4516
SORBS3	15.8033	14.6594	13.222	14.0448	13.9188	13.5629	14.7484	13.7489	11.2903	13.7486	13.1581	13.4547	11.7158	13.607	13.5202	13.0457	12.6895	6.58651	14.1004	14.1148	13.2266	12.5409	13.398	13.5067	13.1666	12.3231	12.2423	13.3302	13.923	13.5032	16.1278	14.1037	13.3082	14.3399	14.3791	13.811	12.4514	16.5224	8.67883	12.5165	13.6167	14.4446	13.8827	8.12807	13.4637	10.516	11.0646	12.0462	13.7465
SYNCRIP	15.2645	15.7929	15.6589	15.6112	15.7625	15.4911	15.6858	15.5945	15.2828	15.297	16.2548	15.4946	16.0472	15.9377	15.7145	15.674	16.1728	15.0833	14.9702	15.4195	15.8002	15.9815	14.96	15.3061	15.6618	15.6591	14.982	16.482	15.6789	15.4436	15.4973	15.8494	15.742	15.6403	15.6237	15.387	15.8227	15.9397	16.4254	15.414	16.2176	15.9039	15.3978	15.9559	15.609	15.1686	15.2702	14.8996	16.0656
CDC40	12.5223	12.389	14.2025	13.7052	13.4289	12.9973	13.1814	12.7375	12.5315	12.6371	13.6344	13.1948	14.0755	13.8502	13.9858	13.1705	13.7533	12.8501	13.1185	13.0354	13.7785	13.6167	13.5863	12.765	13.3294	13.66	13.148	13.8187	13.3474	14.0372	14.0146	13.3	12.6595	13.1553	13.0547	13.8715	13.5363	13.5559	10.9923	13.1451	13.7478	12.6643	13.8725	13.7303	12.7081	13.251	12.5909	13.2424	13.6263
B4GALT4	12.9375	14.1121	11.2642	13.5759	11.6574	13.7103	12.8015	12.2207	12.7907	13.4665	12.4853	12.9781	12.8393	13.0524	13.0676	12.6703	12.0431	11.7508	11.2537	13.0257	14.0224	11.8257	13.1919	13.1864	13.2209	13.7852	13.2947	12.8368	13.0196	12.9113	12.5499	14.035	13.1384	12.1279	13.1325	12.6086	13.4865	11.6354	10.447	11.8749	14.4726	12.642	13.3846	14.6566	13.2171	13.0002	13.6058	13.5562	12.3465
RANBP6	11.4306	13.7229	12.6293	11.9012	14.0718	12.6345	12.7846	13.2379	12.2015	11.2702	14.1478	11.8581	12.6897	13.7925	13.0921	11.9053	12.3003	13.8306	12.0828	13.7286	10.5154	13.155	12.0267	12.0355	12.8675	13.3496	13.7474	12.696	13.8	13.2929	11.7192	13.5854	13.3052	13.1848	12.7113	12.9634	11.39	11.2374	13.8723	12.7819	14.4289	11.9715	14.8116	14.8754	14.0604	12.8493	12.5473	12.0453	13.1744
NEMF	10.9098	12.4817	13.5297	9.20586	12.3369	12.1756	12.782	11.654	12.5246	8.38539	11.6504	12.1216	10.5918	12.0517	12.6134	12.3935	12.8997	11.0871	11.2188	12.603	12.9223	13.6001	12.68	11.8011	11.4172	12.4576	12.5694	12.3403	12.169	9.11908	11.8505	11.353	12.6078	11.2929	12.0613	12.2637	11.1423	11.6482	12.6145	12.8704	12.3336	12.9788	13.3709	11.3495	11.3509	11.4267	12.7606	12.9546	12.1337
GMDS	14.2342	15.9204	15.2146	16.0534	14.9819	16.0748	15.2968	14.2141	16.4129	15.3065	15.4863	12.9772	15.2443	15.8135	15.0243	15.3901	15.3306	15.0438	14.3373	14.8469	16.7412	15.7136	16.0583	16.1377	15.405	14.364	15.7872	15.1291	15.589	13.8561	15.6351	14.9017	15.2932	15.1311	15.4685	15.4755	15.8947	15.0609	14.565	14.2486	16.107	15.726	15.6622	15.6027	14.8029	15.0043	14.8255	15.146	15.779
GREM1	14.2105	14.0352	12.5843	12.8885	13.4483	13.2083	14.4788	13.8806	12.5448	13.9806	11.8658	11.5077	13.6082	12.9391	15.1444	14.4865	13.2617	10.6139	12.4148	13.3182	13.1017	13.6114	13.36	11.0099	13.5546	12.7953	13.3432	13.4128	12.7604	13.0752	13.6434	10.3153	13.2209	12.9089	12.6753	12.6453	12.4154	14.4792	9.91981	15.6678	14.2073	14.3148	12.9882	12.74	13.2656	12.9264	14.7462	12.3921	12.8315
PLOD3	14.0577	13.9732	12.8605	13.347	13.7701	12.6736	13.5369	12.7071	13.6199	13.6787	12.9916	12.9878	13.5421	12.8864	13.7367	12.9589	12.6275	12.7159	12.9445	13.5987	13.6036	13.2227	13.6964	12.7063	12.5626	13.5114	13.6777	13.2192	13.2016	12.9519	14.0134	13.9475	13.9674	12.8214	13.2891	13.434	13.8969	13.5285	13.98	13.9948	13.9412	13.9077	13.7955	13.5497	13.3896	13.7395	13.3618	13.2394	13.5435
EIF4E2	13.4642	13.6052	12.995	10.9818	13.9171	12.8925	13.0458	13.3587	12.055	13.5167	13.6514	13.1036	13.7801	13.1257	12.8418	13.0465	13.7435	13.7789	13.5102	13.776	13.6759	12.9899	13.1947	13.5104	13.3899	13.3901	13.4131	13.2832	13.0312	13.628	13.493	12.5266	10.8027	13.0157	12.6755	13.5705	13.1135	11.7174	11.5402	13.8431	13.8811	7.02942	12.9713	12.7233	13.6673	11.59	13.2487	12.6777	13.19
DIAPH1	15.5631	14.5564	14.8315	15.044	15.1576	14.9916	15.0356	15.1154	15.4097	14.7237	14.6852	14.3374	14.7749	14.9394	15.5214	15.053	14.5837	15.2169	14.6481	15.0922	14.6362	14.3435	15.107	14.8651	14.5336	14.3836	14.9144	13.9666	15.0634	14.6086	15.0696	14.4059	14.0176	14.8713	14.743	15.3091	14.8137	13.9167	13.7505	14.9153	15.0354	14.3849	14.8036	15.4228	15.2446	15.182	16.4814	15.3864	14.7059
TSPAN1	14.0437	16.8615	14.6224	16.0314	13.8675	16.7319	16.971	15.9589	16.3981	15.3462	14.8777	15.65	17.0512	14.9238	15.1485	15.1687	15.6839	14.78	14.709	15.4207	13.4999	13.9354	15.1788	14.8753	15.296	13.1049	14.331	13.5972	14.186	16.9171	15.0584	14.5268	15.2292	14.1785	16.4405	16.4759	15.869	13.6391	15.4334	14.0619	16.8472	14.2607	15.1334	15.776	14.9138	17.7979	15.9592	13.3771	14.5122
EXOC3	14.5185	14.4092	13.8616	14.9918	13.1793	13.9781	13.8423	14.3571	13.7799	14.1069	14.0549	14.1637	13.0176	14.1808	13.9696	14.4229	12.9419	14.2354	13.8938	14.5598	14.0452	14.0053	14.6066	14.8286	13.9278	13.9717	14.2305	13.9106	13.9782	13.9064	13.4189	13.9956	13.9857	14.3331	14.254	14.6596	14.0541	13.7579	9.85327	14.6156	14.3388	14.0319	16.1588	15.085	13.3288	15.1372	15.8013	14.491	14.6332
PLIN3	15.2986	14.9221	15.308	15.2159	14.491	15.2236	15.9593	15.6118	15.3864	14.9027	15.1593	15.4754	16.1335	15.0582	16.2435	14.7192	15.5167	15.5813	15.8243	16.0167	15.3001	15.172	15.4598	15.485	15.0066	15.2924	15.3303	15.2345	15.0134	15.6397	15.5526	14.8842	15.5946	15.7391	14.7328	15.1331	15.2407	15.0411	14.0388	14.8396	15.5514	15.4895	15.3138	15.3612	15.7063	15.893	15.4767	14.8071	15.1507
PRMT3	12.2715	11.3686	12.8414	12.0805	11.3222	11.0495	11.929	11.7851	12.2174	12.1968	12.5186	11.8096	12.8971	12.2315	12.8032	12.7879	12.6854	12.3949	10.9322	11.925	12.1023	12.2645	12.6192	12.2147	11.0493	12.0302	11.9219	12.4237	12.2663	11.0244	12.1982	11.4384	11.5964	11.5833	12.2236	12.1782	11.9488	10.6671	15.4049	12.5547	12.9813	11.5698	12.3808	13.2069	11.5507	11.4961	9.97383	12.3558	12.4643
KPNA6	14.1302	14.9662	14.5747	14.4394	14.6751	14.7599	14.8066	14.7311	14.5621	14.4154	14.5647	14.1807	13.5637	14.562	14.7854	14.0655	13.7594	14.6909	14.2343	14.5844	14.5878	14.3649	14.3139	14.3097	14.4758	14.4149	13.8083	14.4658	14.3382	14.3143	14.823	14.4172	14.1389	14.6072	14.7353	14.5084	14.5654	14.8907	13.5135	14.3859	15.1712	14.7481	14.0558	13.4468	14.6667	14.9746	14.7107	14.1756	14.5849
UGDH	17.2555	14.8591	15.0761	15.4327	15.6642	16.5403	15.5437	14.9889	15.4001	15.6288	14.7564	15.1796	14.8673	15.0259	15.8386	15.1912	14.8466	15.23	14.9144	15.1662	16.196	15.1866	14.9147	15.7271	15.7486	16.915	15.0647	15.6367	15.6697	15.3896	15.7273	14.922	15.9617	15.0281	16.1783	15.5965	15.2788	14.4296	14.7143	14.8322	16.4843	14.814	15.8401	16.2733	15.1806	15.6493	17.2778	14.5344	15.1491
CTNND1	15.8314	16.8121	15.9367	16.4663	15.9785	16.5017	16.3051	15.9274	15.6392	16.67	16.4861	16.0325	16.7653	16.4408	15.8259	16.6431	15.8457	15.6039	16.0283	16.0448	16.2847	16.2665	16.1058	16.4724	16.3022	16.1102	16.445	16.2531	16.333	16.0931	15.7517	16.1077	16.1021	15.8079	15.8847	16.1198	15.5389	15.8473	16.0279	15.8997	16.7561	16.6147	15.6642	16.5557	16.5192	15.9948	16.4088	15.6217	16.3338
EIF1B	13.2516	12.9223	13.5549	13.6825	13.5411	13.0381	13.2238	13.2961	14.2291	13.5157	13.7232	14.2437	13.4403	13.3336	13.3299	14.0549	13.4251	13.7102	13.4151	14.285	13.2094	13.8808	13.262	13.2905	13.3251	13.3217	13.9427	13.8763	13.8758	13.9538	13.356	14.0318	13.4455	13.1646	13.1631	13.2196	13.4706	13.2964	14.0738	13.339	14.0682	13.2226	13.1171	13.4223	13.1906	13.5547	13.3472	13.5855	13.9118
SNX2	13.8266	13.7147	14.1813	14.0957	13.7299	14.3903	14.5106	14.3781	14.4618	13.6689	14.1545	14.0764	13.4445	14.099	14.8252	14.0064	13.2427	13.976	14.8457	14.3539	14.1726	14.151	13.565	14.581	14.3561	14.5186	14.307	14.5109	14.5458	14.3624	14.4575	14.1589	14.1131	14.4709	14.2067	14.0582	14.229	13.9501	10.547	14.0818	13.2068	14.0398	13.9334	13.4709	14.1283	14.3732	14.1066	14.2356	14.3718
DPM1	15.4197	15.3998	15.3373	16.0802	15.5118	14.8363	15.019	14.8541	15.4004	15.6903	15.2711	15.014	16.3521	15.4195	14.9539	15.5679	15.1527	14.2421	15.4166	16.025	15.1642	15.3221	15.0388	14.9115	14.9633	14.6105	15.2898	15.2243	15.2381	15.5651	15.2903	15.1043	15.3474	15.092	14.9695	15.5606	15.7141	15.6112	15.1433	14.2951	15.3104	15.3029	15.3345	15.8606	16.1406	15.5226	16.4205	14.9272	14.9126
USO1	15.2737	15.2497	14.9966	14.9089	14.5218	15.2615	14.969	14.962	15.256	15.2193	14.7866	15.0889	15.3268	14.4434	15.4666	14.8322	15.1225	15.2542	14.7805	14.7253	14.9303	15.57	15.2096	15.3139	14.87	15.0553	15.3658	15.0139	14.9762	15.7509	14.8647	14.8788	14.972	14.9706	14.5618	14.8437	14.923	14.084	15.3619	14.6661	15.3632	14.7404	15.7612	15.7253	15.287	15.21	14.6165	14.8223	14.6694
TOM1	12.2655	12.2556	13.4457	11.953	13.1401	12.2693	13.1481	12.9778	13.004	12.9062	11.9641	12.5732	14.0611	12.3992	12.283	12.5552	13.5363	12.1824	12.4045	12.702	12.6966	12.2572	12.2434	11.8521	12.3569	12.2512	13.6878	12.2323	12.4946	13.0379	13.0578	12.6134	12.6758	12.8308	11.8667	13.1109	12.5048	13.8048	11.5023	13.8923	13.4027	12.7827	13.2075	13.6154	13.0086	12.7807	13.2641	12.3057	12.3408
PFKFB2	14.1545	14.4415	13.8875	14.7633	14.2364	14.0007	13.5976	14.0126	13.8617	14.6007	14.3371	13.8915	13.6165	13.975	14.1284	13.8054	14.4363	15.1629	14.7603	14.1221	14.178	13.6258	14.5545	13.9666	14.1363	13.5633	14.283	13.7656	14.2514	13.6206	13.9182	14.9749	13.8458	12.8862	14.1961	14.1893	16.4286	14.617	11.9303	13.5002	12.1375	13.7073	13.2093	14.0013	12.9663	14.4283	14.6179	14.6393	14.0163
CCDC22	14.7259	15.252	15.0619	15.8241	14.3991	15.558	16.0939	15.1879	15.5538	14.7884	14.5281	15.4192	16.1393	15.1033	15.3259	15.1981	15.7883	15.3532	15.4799	15.7655	15.1791	14.9098	14.959	15.1267	15.022	15.0501	15.2415	16.1058	14.8671	16.1026	16.1596	14.8318	13.0784	15.2118	14.7632	15.4301	14.7612	16.4358	8.64152	14.4189	15.7753	15.3826	15.1991	15.1037	16.116	16.2037	15.3436	14.9483	15.6254
PQBP1	13.1905	11.773	13.6475	13.0536	12.4997	12.804	13.135	13.0516	13.0614	12.8723	13.1292	12.4667	13.361	12.6113	12.4578	12.1381	12.9243	13.2107	12.8136	13.0987	12.5802	13.0691	12.4292	12.7126	12.656	12.4953	13.0658	13.1166	12.4785	11.5469	12.9897	12.7193	12.9979	12.4309	12.5433	8.5154	13.2056	12.7464	13.3386	12.5545	14.4934	12.4259	12.6866	12.8695	14.0907	13.0714	12.4673	12.0422	12.4848
PRAF2	15.2445	15.8799	15.2478	14.4372	14.6112	14.9244	15.6575	15.4582	14.6265	13.8034	14.5956	15.0211	13.5944	14.9151	15.2867	14.6403	14.0851	15.4045	15.3696	14.7257	14.7987	14.8875	15.0976	14.7327	15.1015	14.8529	14.8638	13.6016	14.2876	15.8264	15.4599	15.1624	15.761	15.5261	15.3547	12.7214	14.6584	15.3688	11.6303	15.1376	13.9347	15.788	15.3847	13.2983	13.6493	15.5664	15.3655	14.1227	15.0278
DKC1	16.9905	16.4497	16.3112	16.1362	15.7511	16.1726	15.6059	15.7415	15.9605	15.5688	16.5175	15.9646	16.136	16.5936	16.0197	16.4214	15.8577	16.5162	16.0251	15.5933	16.7115	16.3173	16.1962	16.4505	16.715	16.3182	15.8624	16.4252	16.7464	15.4938	16.6853	16.7321	16.7108	16.1365	16.7197	16.0105	16.449	16.2814	18.3242	16.4538	15.9421	16.947	16.2058	15.3616	15.8148	15.7523	15.4866	16.3943	17.0079
EIF5B	14.4839	15.2325	14.5281	14.5324	13.9202	14.5199	15.0152	14.2145	14.298	14.537	15.0701	14.4007	14.5604	14.5981	14.9861	14.9835	15.3979	14.6442	13.9155	14.0919	14.6096	14.965	14.256	14.361	14.5514	14.3843	14.3304	14.5351	14.6778	14.5216	14.2154	14.6967	13.8599	14.8175	15.3833	14.9313	14.8667	14.2418	16.1748	15.0386	14.2119	15.3912	14.6844	15.0608	14.8972	13.5359	14.0082	14.902	15.3497
ZG16	11.7806	11.4153	9.94205	14.7848	12.9289	11.0717	10.688	12.2831	14.1854	13.5196	13.5824	10.9021	15.1603	11.8703	11.5054	11.4612	13.3097	13.6233	12.6115	12.731	11.6626	11.6095	12.6252	13.0224	17.0908	12.5621	12.1123	11.187	13.7201	11.0665	12.8416	11.6339	12.0001	11.6364	11.3797	11.403	11.8999	11.1364	11.5629	12.2907	11.0884	12.4227	13.4105	16.8769	13.4779	16.9484	12.573	12.7994	10.368
EDF1	14.1707	14.2164	14.164	13.5514	12.611	12.6335	13.3773	13.3981	14.7566	13.432	13.5377	14.452	10.7647	13.9145	13.6043	12.2672	10.7978	13.3399	14.0931	14.0658	14.0548	13.7039	14.2678	13.5962	13.7344	13.7969	13.9546	13.5829	11.8172	13.3554	13.4564	14.024	12.8844	14.4512	14.1281	12.3703	13.1128	13.2137	15.8833	14.3863	11.8282	13.862	14.2723	11.9077	12.3164	13.3104	13.8829	14.5662	14.4625
DIAPH2	15.4406	15.5445	14.9527	14.4156	14.2214	14.6526	14.4782	14.1564	14.7409	14.6718	15.6519	14.2477	15.1351	14.1646	16.3424	14.9308	14.7694	14.8909	15.3442	14.8329	14.4338	14.5901	15.2919	14.7741	15.0232	14.2622	13.6497	14.6943	14.6474	14.2266	15.5743	13.8775	13.917	13.7838	16.3114	14.0473	14.9197	13.4761	13.1319	14.5531	14.445	14.5298	14.779	14.9411	15.5547	14.0101	14.43	14.0942	14.5105
DNAJA2	12.3902	12.6609	12.6936	13.0573	12.2017	10.8837	12.7236	12.4403	12.9774	12.2254	12.2902	12.5672	12.7197	12.403	12.5123	12.8353	12.6565	13.0632	12.5762	12.9755	11.7193	12.6572	12.7875	12.3	12.4383	13.6839	13.1419	12.7773	12.5792	12.3529	11.4143	12.8669	12.3586	11.5844	12.1474	12.8042	12.3906	12.8985	11.031	12.3558	13.9497	12.083	12.2468	12.9476	11.8843	12.9918	12.5975	12.2519	12.9462
BRD4	13.0218	13.8211	13.0039	12.181	14.1568	12.5198	12.7008	12.9286	13.33	13.5153	13.1869	12.9893	13.0102	12.9806	13.3312	13.0153	12.8041	13.1487	13.5196	12.9065	13.2385	13.1849	13.6049	13.166	13.1572	12.9348	12.8698	12.9124	13.1974	14.1244	12.2161	14.3953	14.561	12.8596	12.5788	12.6695	13.0171	13.306	16.3379	12.9357	12.6353	13.5815	12.674	12.552	12.9139	14.8496	12.6129	13.5556	13.1843
CUTA	15.9094	15.733	15.5828	15.8252	15.6289	15.6337	15.9304	15.7268	16.0542	15.8373	16.0066	15.4175	16.4614	15.9379	15.1381	14.8705	16.7665	15.9499	15.6877	15.392	15.829	15.9814	15.6793	15.886	15.6637	15.7772	14.7199	15.9163	15.7839	16.0111	15.8103	15.7401	15.4474	15.8974	15.4196	15.8828	15.6021	15.821	16.0146	15.0409	15.1701	16.487	15.5311	16.0319	15.4544	15.3284	15.9635	15.106	15.6177
HUS1	19.2345	14.3842	17.7284	17.9007	16.6292	17.9528	18.2578	17.987	18.2256	17.5329	17.4451	18.8309	17.7087	15.4057	17.8211	18.0218	15.9895	17.5817	18.2232	17.9186	18.1413	18.177	17.3869	15.6214	17.5397	18.0221	18.2117	17.3371	17.0374	18.2352	17.7975	15.2278	14.313	17.8875	17.8327	17.2883	17.5641	18.8895	14.1728	17.3956	16.1594	14.7184	17.4255	17.3483	14.7395	18.3143	16.6258	17.186	18.2066
PFDN1	14.9326	14.7498	14.5441	14.7831	13.8735	13.9396	14.3607	13.9803	15.0427	14.1718	14.2464	14.4481	12.5985	14.6417	14.7223	13.9816	13.4872	14.0208	14.7004	14.832	14.5789	14.4589	14.4923	14.5263	14.0948	14.5497	14.7706	14.4639	14.6995	14.2485	14.3706	13.8835	14.3442	14.7669	14.2785	13.3771	15.1078	14.7854	14.8084	14.0745	13.6306	14.6361	14.7587	13.3768	13.8031	14.214	14.1184	15.0409	14.5578
NBN	13.4433	13.421	14.0256	13.0061	13.7376	13.334	12.2936	12.8388	13.6511	11.9402	14.2133	13.2104	13.1531	13.9462	11.6961	14.2176	14.5841	13.07	12.6814	13.8408	14.0983	14.1722	13.2689	13.7921	13.9189	13.8332	13.7233	14.1317	13.4498	11.9215	12.9442	13.6265	13.377	13.472	13.8035	13.7768	13.2153	13.5099	9.93369	14.2757	12.8419	13.9459	13.5403	12.819	13.0493	11.2694	14.0258	13.956	13.7683
ABCB7	14.9229	15.1833	14.9256	14.4727	14.3696	14.5196	14.2515	13.6372	14.4019	14.5822	14.7676	14.5875	15.1578	14.8777	14.2937	15.2517	15.0313	14.6086	14.6962	14.3918	14.6766	14.7069	14.9172	14.6321	14.6652	14.5619	14.5402	15.0821	15.1113	14.2905	15.1876	14.6018	14.8551	14.8699	14.7653	14.6334	14.834	15.1189	16.0606	14.2171	15.0026	15.1102	14.9754	15.1786	15.304	14.2709	14.5268	14.8	15.0014
PLXNA2	12.28	13.0565	10.3714	12.2113	13.3098	13.5168	13.5235	12.7699	12.3882	12.8567	11.599	12.8334	15.1807	12.6166	12.6731	13.9431	12.1513	12.994	12.4093	11.9487	13.8769	13.1583	14.4673	13.3578	13.6595	11.8435	13.926	13.3377	12.3841	11.9682	13.1698	15.2602	13.9768	12.5723	14.7048	12.4885	13.036	13.0607	11.4931	11.2158	12.3307	12.3548	12.5477	13.4481	14.3116	12.1314	12.6561	13.5584	12.8099
FAM20B	14.2928	13.7991	13.7752	11.0236	14.1069	13.5095	12.2282	13.1977	13.8937	13.807	13.6171	13.9083	12.6899	14.9455	14.1529	14.136	12.2062	13.374	14.1751	13.9181	14.3916	14.6767	14.4663	14.1691	13.5946	13.8602	14.4102	13.3172	13.1512	13.4631	13.1566	14.1768	11.4308	14.5993	14.2154	12.6322	14.3943	14.4433	10.6267	14.0405	12.3425	13.6666	13.9032	12.9922	13.4665	13.5074	14.0117	14.8678	11.8332
EFCAB14	12.1128	13.0785	13.1967	13.101	12.2978	12.9453	11.6305	11.6535	13.3049	12.4465	13.2773	13.3795	12.6895	13.0387	11.9112	13.8359	12.934	13.1817	11.9031	12.8555	11.9211	13.5624	13.4275	12.2326	13.3583	13.7842	12.8967	11.8893	12.3593	11.6731	11.9215	13.7135	13.4434	13.3683	12.8677	13.3387	13.6885	13.4521	15.6509	12.4507	12.5082	10.7399	13.2901	13.9312	14.1379	14.0593	13.7638	13.7012	11.7057
WDR1	17.6129	17.3177	17.174	16.952	16.6107	17.0634	16.9028	17.0746	16.2512	17.4231	16.5962	16.7851	16.5754	16.6105	16.7013	16.4108	17.2014	16.9808	16.8033	17.3751	16.4995	16.3314	16.9455	16.8341	16.7612	16.6071	17.1242	16.9359	17.1089	16.9766	17.0328	16.9225	17.124	17.0658	16.4561	17.5296	17.083	17.3002	16.8448	16.6002	16.1812	16.9725	17.3668	16.9947	16.5084	16.9984	17.0906	16.8275	16.8165
SLIT1	15.8904	15.4053	13.0336	14.0082	14.2688	14.6206	14.2947	14.2833	11.9339	14.7411	15.2551	15.1922	13.8734	15.4044	15.5934	14.0644	14.0602	15.4615	15.0412	14.4174	13.3186	14.826	13.1539	15.0272	14.7957	15.2027	14.4733	14.2767	14.6064	14.9884	13.6882	14.3408	14.1845	15.6505	15.6188	13.2985	14.4884	13.3444	13.6458	13.7213	14.6712	15.0642	15.1478	14.2933	14.412	14.6244	14.7669	14.7454	14.1647
ATP9A	12.9151	13.5864	11.8891	14.1198	11.9804	13.0168	11.9138	12.1384	12.9177	12.2128	12.6304	12.0262	12.8653	12.5065	12.0961	12.5151	13.3966	11.5922	13.7217	11.995	12.9805	12.1977	13.7741	13.2815	13.3364	13.0164	12.9166	13.1814	12.4464	12.2514	12.3297	11.9446	13.4799	13.1537	12.2331	12.8305	12.6909	13.6021	15.2442	12.4897	11.71	11.912	12.8053	11.7185	11.7539	12.6209	11.4586	12.9594	13.6117
ROCK2	15.4069	15.0958	15.0779	15.3829	15.0206	15.8708	15.3988	15.158	15.4189	15.4538	15.6439	15.1654	15.5833	16.0251	15.2935	14.7187	15.0046	15.1416	15.3567	15.428	15.8874	15.1943	15.1199	15.5501	15.2657	15.559	15.3049	15.3344	15.365	14.8661	15.2271	15.2925	15.0093	15.6904	16.1626	16.0107	15.1974	15.6885	14.8703	15.0998	16.1415	14.8456	15.0693	15.4149	16.0558	15.2373	15.5685	14.8041	14.7568
CLASP2	13.649	14.1335	12.3637	12.8994	13.0529	13.1256	12.3588	13.6513	14.3521	13.5898	12.3247	13.0703	12.086	13.265	12.6854	13.7807	13.5281	12.5507	13.704	13.522	13.1331	13.144	13.012	14.0253	13.1305	13.1155	13.522	13.4591	13.4734	12.455	13.3752	12.9872	13.9907	13.04	12.8661	13.1798	13.2552	13.669	15.8421	13.2982	15.4656	13.8184	12.9946	13.9816	13.0957	14.3477	12.369	12.8875	13.5064
PTCD1	11.2183	12.5708	11.8632	11.7433	11.6807	11.5158	11.202	10.0215	12.0386	12.3501	12.1176	12.3036	12.1246	11.5606	11.0695	11.349	10.6303	11.6524	10.8555	11.8409	11.7821	11.2272	11.4472	10.4849	11.4205	11.5224	11.8035	11.2268	11.2871	11.5697	11.544	12.2127	11.6804	11.9999	11.8718	11.6053	12.4707	11.1115	10.5288	11.0848	12.4461	12.5915	12.056	11.2248	11.5497	10.7429	11.7909	12.0044	11.5234
CPNE3	15.9431	15.5601	16.4593	15.5714	16.0979	15.8736	16.047	16.23	16.2707	15.4699	15.7598	15.5983	15.048	15.8534	15.4414	16.3613	15.8823	16.1669	15.0822	15.9667	15.7082	15.7618	15.6049	15.4364	15.6503	15.3945	15.2097	15.4594	15.6214	15.7948	15.4651	15.5979	15.6547	15.8984	15.87	15.7259	16.0775	15.691	16.162	16.2547	15.0623	15.6701	15.4893	15.4054	14.9517	16.1385	15.6581	15.4216	15.9164
HIP1R	13.312	14.2647	12.7214	13.0258	12.9568	12.6624	12.8341	12.9632	14.0051	13.0729	12.5613	13.9368	13.0571	13.0539	12.6944	12.4991	13.2492	13.3046	12.9235	12.0953	13.5624	13.3695	13.4205	13.6066	12.8525	13.2666	13.9556	12.21	13.0913	11.9362	12.9578	11.873	14.1217	12.5659	13.4132	12.7983	13.6523	15.2779	14.5421	13.4252	12.5923	12.3243	14.0053	12.6692	12.9291	13.5269	13.6888	13.1735	13.45
RNF40	13.8904	13.0652	13.8482	13.2641	13.4331	14.4537	13.714	13.1587	14.4134	14.0379	12.9685	13.6897	12.5698	13.9616	13.7849	12.9939	15.2469	14.2171	14.2855	13.4827	14.4002	13.9996	12.9399	13.4451	14.1202	14.7506	13.8073	12.8644	13.9422	11.0404	13.3883	14.3273	14.5234	14.2586	14.2166	14.4952	13.4443	12.9796	12.5987	13.021	13.0717	13.0245	15.0469	15.1291	14.9709	13.4163	13.8796	14.4895	13.9718
ZC3H11A	13.8511	12.8351	14.0261	13.4482	14.1289	13.4684	13.4263	12.9585	13.9952	13.5952	13.7986	13.4401	12.9061	14.1545	14.4119	13.3859	12.8741	14.1935	13.7396	14.1868	13.9933	14.0339	13.862	13.3394	13.5608	13.796	14.2293	13.7815	13.938	13.8993	13.7995	13.9033	13.0273	13.9033	13.566	14.1104	13.8507	14.2177	14.1968	13.8225	13.0201	13.4119	13.8412	12.527	12.9811	13.455	14.3797	14.4973	13.9376
CLUH	13.3792	14.4206	15.1603	14.543	15.23	14.7944	14.2658	14.9385	14.2484	15.1698	15.3546	15.1128	14.4659	15.0145	15.1328	15.2608	14.4786	14.4078	14.3112	14.5949	14.6133	14.8672	14.7311	14.9064	15.1267	15.0149	14.343	14.9893	15.163	14.2395	14.77	15.3466	14.9071	14.3403	14.801	14.9096	15.0798	14.392	15.526	15.1317	13.9933	14.4004	15.8623	14.3249	14.0738	13.6748	14.4158	15.0594	15.3158
DNAJC13	14.2263	15.1009	14.7646	14.2076	15.1121	14.7666	14.4238	15.0156	14.5037	14.5468	14.3499	14.6098	14.9963	14.7069	14.694	14.4616	15.1492	14.0593	14.4889	14.2201	14.6396	14.4549	14.8462	14.6078	14.3604	14.9104	14.9623	14.5777	14.5927	14.6812	14.6957	14.3954	15.0217	14.7728	14.2613	14.6974	14.2487	14.0099	15.971	15.5692	14.6559	14.4047	14.9558	15.0024	14.7371	14.9496	14.2005	14.5953	14.556
PPP6R2	12.6695	12.9568	12.7697	12.8432	12.8156	12.603	12.4533	12.7237	12.0788	13.5444	12.4296	13.1673	13.9611	11.8233	13.5544	12.4213	11.9458	11.3561	11.6351	11.7316	11.958	13.1898	12.9383	13.7565	13.038	12.5389	12.8334	11.4878	12.6416	13.2934	12.2781	12.7812	12.7235	12.9737	9.37295	11.8247	12.5102	12.3129	15.0171	12.7145	13.1203	13.4185	13.1326	12.9575	12.7306	12.3161	11.609	12.634	12.6751
ANKRD17	13.3508	14.7776	12.9575	13.0948	12.9289	14.2845	14.6681	13.2549	13.1115	14.9033	13.6377	12.4028	12.0568	14.6523	15.7438	13.3404	13.6566	15.5913	13.0795	13.2701	12.9992	14.2301	13.0153	11.6304	11.9202	13.4827	11.8493	14.0269	12.7066	14.4609	11.4953	11.7941	12.0801	13.3683	12.1317	15.6398	13.6291	11.7728	11.7317	11.9183	13.0048	13.3329	12.6964	15.0554	15.0112	11.8176	12.3197	13.7671	12.3455
COQ9	12.8516	12.647	12.8321	13.4438	13.2223	12.2245	11.8192	12.1542	13.1408	12.2055	13.08	13.0737	12.8879	12.9343	12.1013	13.4178	13.9125	13.4156	13.8933	12.9176	12.3821	12.9495	13.9493	13.8297	13.3372	13.5383	13.072	12.8451	12.9269	12.6551	11.5276	13.0483	12.9705	11.9343	13.4484	12.281	13.1508	12.7542	13.839	13.5408	13.4842	13.2012	12.3012	13.8593	12.5153	12.3393	13.0313	13.0156	12.5638
GGCT	15.2485	14.1369	14.2577	14.7224	13.5286	14.085	13.4146	13.4299	14.5217	14.2933	14.7776	13.7944	15.4853	14.1744	14.0929	15.1627	15.5705	14.9163	14.1262	14.7057	14.2263	14.1031	14.8479	14.2906	14.2928	14.3649	14.0524	14.3695	13.9008	13.5313	14.3702	14.3103	13.6436	14.1724	14.854	14.3543	14.4725	14.5216	14.6732	13.4511	14.5923	14.4323	14.0853	15.1384	15.126	13.3533	15.5546	14.8506	14.3767
NDUFS7	13.0042	12.3043	12.9769	13.8655	14.2418	12.9343	13.5535	13.4999	14.0047	12.9085	13.7488	13.9853	13.4097	13.5049	12.9029	13.3078	14.2609	14.0748	13.9442	13.8701	13.0303	13.6269	13.3528	14.4867	13.9852	12.8993	13.8347	13.9062	13.2212	14.2945	13.7188	13.8957	13.5367	12.7035	12.0684	13.0486	13.0528	14.5019	10.8012	13.3198	11.3155	12.9709	13.9263	13.5945	11.4658	14.9069	14.0206	12.9438	13.4993
NDUFS2	13.9152	13.4745	13.064	13.9776	13.7209	13.5538	13.7783	13.4605	13.3127	12.7575	14.1557	13.9017	15.2207	13.6582	13.2225	13.8531	14.6191	14.4256	14.0557	13.9087	13.5781	13.1673	13.1313	14.4779	13.9241	13.5082	14.0366	14.2853	13.1019	14.1986	14.1061	13.8899	13.9031	13.0751	13.0835	14.5084	14.1142	14.2958	13.1619	14.0363	15.2548	13.9903	14.9975	14.8528	14.1541	13.5575	14.4745	12.8214	13.5656
ZPR1	12.2885	13.2692	12.3255	13.7051	13.1981	12.9808	13.6274	13.0623	13.1266	12.7765	14.1276	13.1783	13.641	13.4254	13.4589	13.9453	13.926	12.75	12.5133	13.0379	12.8268	12.6149	13.0632	13.2422	13.1267	13.0245	13.0204	13.478	12.3904	13.714	13.4204	12.7356	12.7146	13.1241	12.4456	13.6962	12.5623	12.9883	13.0363	13.0094	14.1246	13.5644	13.0001	13.0593	13.5347	14.1452	12.3649	13.3355	12.6787
NIPSNAP2	13.3803	13.1752	12.6622	11.9389	12.7979	12.4275	10.9897	12.5287	13.6353	12.9139	12.939	12.2426	11.4455	12.8501	11.9081	13.3891	14.3615	13.1887	13.5328	12.8672	13.5236	13.1825	13.6352	13.2111	13.0604	12.4856	12.2085	13.4575	13.1256	11.8208	12.8823	12.3427	12.4367	12.2816	13.5202	11.4714	12.2519	14.484	11.7947	13.272	12.9776	13.2189	11.791	12.5978	12.3794	12.1811	13.7667	13.1122	13.5335
PDCD6	13.1068	12.9386	14.4546	13.2735	14.7381	12.3633	13.1861	13.7873	13.784	14.2134	13.3302	13.4072	15.5183	13.4785	13.5134	16.704	14.3807	13.8535	13.5219	14.3137	13.8507	13.171	11.7922	13.0227	12.5833	12.3656	14.3183	13.7289	13.0991	14.4464	13.2386	14.4733	13.6881	13.4769	13.3858	14.5673	12.645	14.4295	11.9749	14.218	15.4367	13.2346	14.4361	15.2646	15.4724	13.766	14.3378	12.207	13.4475
TBCA	15.4673	14.6065	15.0797	15.0745	15.0424	14.9049	15.2647	15.2052	15.8351	14.7167	15.1754	15.2527	13.5741	15.2215	15.5866	14.6031	14.7712	15.5692	15.2737	15.3653	15.0871	14.9387	15.2076	15.1299	14.7726	15.365	15.1294	15.0573	15.1926	14.8664	15.4891	14.882	14.5587	15.2119	15.2058	14.5526	15.326	14.9885	14.7049	15.0302	14.1741	15.2953	14.7333	14.3603	14.7181	14.8603	14.746	14.5802	15.3058
ATP6V1G1	13.6029	14.2413	13.3862	14.073	14.4384	13.8383	13.9064	14.3685	13.757	13.8918	14.1594	14.1225	13.1495	14.3706	14.0904	13.1057	13.155	13.9346	14.0087	13.7314	13.8912	13.8214	14.4306	14.0486	13.7667	13.7352	13.4453	13.6863	13.569	14.488	14.0547	13.7284	13.0901	13.7345	14.1798	13.6443	12.8151	13.4646	9.90971	14.6362	13.8767	13.9363	13.2365	13.263	13.1084	14.0911	14.5048	13.6083	13.3196
VPS4B	15.7511	14.8602	15.2606	15.6646	15.8237	15.7549	15.9731	15.8473	15.4157	15.5984	15.6149	15.2211	13.7928	15.3908	15.5444	15.0568	14.7335	15.1545	15.6718	15.4751	15.549	15.7969	15.6185	15.9063	15.7348	15.8437	15.3359	15.4746	15.6816	15.6561	15.6433	15.0404	15.5211	15.548	15.0518	15.6711	15.486	15.3702	15.7062	15.752	14.8555	15.2766	15.8153	15.3441	14.6788	15.612	16.0713	16.092	15.2628
MPDU1	13.0668	14.2136	13.1675	13.6082	14.0475	12.9121	12.4222	13.8432	13.1574	12.2406	13.5272	14.3473	13.6507	14.6881	13.7558	14.028	13.394	13.0456	14.3819	12.9824	13.643	14.2006	14.1609	14.8306	14.1689	14.3782	14.354	12.618	14.0615	13.7842	14.0201	14.2428	12.824	12.6	13.6954	13.3223	14.5282	14.1325	15.3719	15.4443	13.6717	14.0638	13.9692	14.6307	13.8342	13.8234	12.8349	14.3151	13.6508
ENTPD6	15.953	16.0961	15.3857	14.2635	12.713	12.2772	15.1738	14.1712	14.0669	11.383	13.0293	14.327	14.6287	13.1873	14.7044	12.4145	14.2656	12.2155	14.7841	14.4479	14.8857	13.4793	14.3758	11.8307	14.2302	14.1384	14.6408	14.9492	14.547	13.7948	14.129	14.5464	15.0566	13.4077	14.3361	13.4241	14.924	15.3207	12.1405	13.674	13.0954	14.6984	15.5463	12.9212	13.6707	13.5853	14.0801	14.5311	14.9334
ENTPD5	10.6327	13.3511	11.6546	14.0412	11.0237	13.4253	9.99973	10.6521	11.73	13.277	12.1596	12.4892	13.2685	10.8566	9.80547	11.4484	13.6378	13.3174	13.3451	12.5276	13.9574	11.5615	14.5853	13.8314	13.5035	13.3196	12.8022	12.5071	13.4428	11.3517	11.5494	11.6143	12.9812	11.5268	13.4963	12.0009	13.9116	10.4299	15.3802	11.1803	13.7382	12.2884	12.2127	14.1241	11.8908	12.2699	11.6276	14.4402	11.4974
BCAS1	11.6589	12.3479	10.4838	14.0687	10.6379	13.5077	10.9375	13.5987	11.6931	11.9218	12.845	12.3826	12.2238	11.322	11.3237	11.9907	11.098	11.3462	11.6655	6.00927	12.1056	11.0434	14.1284	14.3014	13.4278	14.1255	13.2439	12.2385	12.0116	13.7738	11.8881	14.9061	11.5544	11.4303	11.2731	10.6277	12.9444	13.4469	11.916	11.6613	10.8096	12.1663	11.8643	12.68	11.9298	12.8832	11.4277	12.5801	11.4859
MACROH2A1	18.0832	17.4395	17.1875	17.0049	16.7327	16.1024	16.2728	16.4087	16.1238	16.216	17.0803	17.1366	16.3388	16.7774	16.5794	17.0238	17.1166	17.236	17.7396	17.6219	16.2138	16.9656	17.3952	17.4407	17.4415	17.5691	17.1731	16.4841	17.0824	17.0773	16.2335	16.9096	16.6966	17.1446	17.4106	17.023	16.4851	16.3532	15.9669	17.5557	16.8864	17.2671	16.3923	16.627	16.9954	16.5793	19.1217	17.2312	16.7883
SH3BGRL	15.6355	15.3058	14.9723	15.0596	14.2759	15.1061	15.0105	15.4053	15.6621	14.4006	14.5216	15.4445	15.7443	15.1122	15.4667	14.8172	15.4853	14.5708	15.8891	15.5025	15.1991	14.904	15.7062	15.7446	15.6682	15.0297	14.9671	15.8932	14.7492	15.6307	15.7196	15.0306	15.2865	15.0518	15.104	14.3447	13.6311	15.4547	14.4872	14.9453	15.2566	15.3983	15.5191	14.8763	16.03	15.3046	15.1645	14.5285	14.4372
FLNB	16.1578	16.6338	15.8278	16.8508	16.358	17.2204	16.7375	16.867	16.9879	16.8785	16.255	15.9495	16.0653	16.7928	16.5919	17.4254	16.6872	16.835	16.5583	16.5855	16.681	16.1536	16.7877	16.9442	16.6484	16.0114	16.6231	16.4911	16.7514	16.6322	16.4071	16.8362	17.2273	17.3876	16.6236	17.3266	16.639	17.354	16.6789	15.564	15.9597	16.3988	16.4423	16.3498	16.7301	16.3182	16.3772	16.6416	16.7482
NCOR1	14.47	14.585	14.4093	13.6545	13.8339	13.1486	13.653	14.3139	12.246	13.954	13.5719	13.8074	14.2386	15.5019	12.1419	13.6189	14.1046	14.3505	11.3485	13.1264	14.0974	13.7557	12.5821	13.2864	14.0451	13.6087	13.1185	13.3858	13.1725	11.7832	11.5105	14.4393	12.4266	13.5378	14.7592	12.8035	14.0675	14.4366	10.2921	12.6874	13.0935	14.0625	13.5282	12.6016	14.9917	13.0475	13.09	13.2434	14.3749
NDUFS6	11.7014	12.3786	10.9926	14.1063	11.0112	12.3993	13.0902	11.9142	12.4626	3.70706	12.8308	13.8975	14.8649	11.7951	12.2528	13.2908	13.134	14.2293	12.7834	12.6377	12.7366	11.548	11.8608	13.3919	13.05	11.6178	13.5074	13.5247	11.477	12.6487	12.5568	12.6321	13.2521	12.0554	11.4231	10.9626	8.43897	12.8111	10.4014	7.77245	14.66	13.6333	11.9915	14.1007	14.3941	13.0379	12.5265	11.4799	12.9447
PEX14	12.3974	10.8457	12.3817	11.2954	12.6747	11.5042	12.6623	11.9761	12.5236	12.0817	11.9419	12.4276	10.9215	12.0506	12.0013	11.959	10.4965	11.1501	12.364	12.2644	11.9884	11.8695	12.2293	11.9902	12.0456	11.8954	12.3194	12.4533	11.9285	11.9034	12.0128	11.3374	12.1644	12.6144	12.8773	11.5385	12.0035	13.1547	12.6648	12.0733	11.7304	12.5504	12.2489	12.4286	12.1703	12.9155	12.3585	11.572	11.6964
CS	16.9502	17.3956	17.6183	16.8915	17.2359	17.035	16.961	16.7399	16.8793	17.4706	17.0095	16.9486	17.7673	17.0821	17.1107	17.1207	17.8145	17.6644	17.2512	16.9132	17.0565	17.0641	17.4392	17.2824	17.1981	17.1948	17.3991	17.0822	17.2355	16.4532	16.894	16.9428	17.1522	17.1307	17.2823	16.94	17.693	17.6425	17.8708	17.1556	18.0221	16.8921	17.3401	17.6215	17.6056	16.6609	17.075	17.3208	17.1384
SPAG7	10.7054	11.9297	12.1043	10.5149	10.6128	12.2151	11.1511	11.9957	11.687	11.7438	11.0403	11.8046	10.5506	11.2793	11.6893	11.8027	11.9759	11.7855	11.2138	11.7878	11.6454	10.6266	11.3332	11.6254	11.4571	12.8668	12.3961	12.0449	12.706	12.2835	11.6278	12.302	13.149	9.67692	13.202	8.33976	12.339	11.9213	12.2581	12.3211	10.1423	12.5819	12.204	12.2443	10.4426	12.24	11.4638	11.5481	12.5276
MRPL33	12.6169	12.0235	12.9222	11.173	11.7059	12.4878	12.3421	12.0545	12.7247	11.8578	12.7976	13.3139	10.0103	12.4675	11.8462	12.5878	12.9076	12.3424	12.6369	13.0005	12.7018	12.1785	12.0979	12.3067	12.498	12.5019	12.8322	11.7347	13.1225	12.7344	12.3768	12.2622	12.2143	11.9838	11.4777	11.1795	12.4397	12.3337	11.5225	11.7987	10.6188	12.0697	12.4654	11.8901	11.4738	11.399	12.4739	12.1562	11.9272
SEC22B	17.0001	17.3464	15.79	16.516	16.5565	16.6545	16.169	16.7597	16.2346	16.7218	16.5248	16.7152	17.0299	16.4916	16.3319	16.4788	16.3298	16.8448	16.7222	15.6834	16.625	16.5943	16.7098	16.7987	16.7236	16.8291	16.6596	16.5878	16.5745	16.8273	16.804	16.6886	16.6535	16.7871	16.7869	16.0508	16.9383	15.6379	17.0777	16.4416	16.0485	16.4856	16.7653	17.3256	16.3403	16.7088	16.3275	16.2664	16.2734
PRPF40A	15.6213	16.0504	16.0952	15.4844	16.1164	15.3567	15.4298	15.5403	16.0047	15.6243	16.0402	15.8497	15.9934	16.066	15.7713	16.1036	15.2098	15.7416	15.648	16.0673	15.883	15.8578	15.8969	15.6456	15.8019	15.8776	16.0637	16.2014	16.1672	15.663	15.4161	16.1919	15.2672	15.7668	15.5913	15.4456	16.5945	16.0585	17.4743	16.2263	15.982	16.5188	15.5397	16.1129	15.9706	15.0265	15.4899	16.465	16.0639
TACC1	11.8523	12.2471	12.2641	10.9439	13.4984	12.7261	13.6066	13.3143	11.7282	12.7243	12.3454	12.2181	12.5826	11.0991	13.0478	12.0779	11.1957	13.5161	13.7426	12.6137	13.5971	13.0449	13.6257	12.8546	12.548	12.3569	12.6145	11.7386	12.9442	13.3298	13.7474	12.0849	13.6979	12.6905	12.8971	12.3263	13.7631	13.9973	11.2381	11.4962	10.6603	13.7538	12.9527	12.1838	12.3266	12.5982	12.4868	12.8398	12.9166
LRCH4	12.7649	14.9055	11.8194	11.4463	13.0056	12.7279	13.4981	12.7759	13.1147	15.0441	11.7544	12.5158	12.5669	11.0474	12.1138	12.3875	12.7883	12.6909	11.6026	12.8416	12.417	11.5802	11.948	12.8324	13.3928	12.6494	12.8043	11.5429	13.0709	13.3477	11.1512	10.9163	11.7099	12.0475	11.6027	11.915	12.7056	12.703	12.0429	13.4954	12.9571	12.1518	13.175	12.3225	11.7636	14.2151	12.9706	12.41	11.3971
MTX2	12.3323	13.2965	13.132	13.9205	11.5057	13.4562	12.5562	12.562	12.7668	13.8398	13.2475	12.8324	13.5807	12.6127	11.8834	13.1695	12.6198	13.2028	13.1606	13.286	13.7158	12.3225	12.2402	12.8263	12.4145	13.4702	12.4364	12.3443	13.8863	14.3403	12.7286	12.6092	12.3501	12.668	13.9162	12.9541	13.5806	16.4425	15.2118	12.0332	14.2829	14.1401	11.7264	14.3109	13.468	13.8624	12.9317	13.2176	12.678
VPS26A	14.382	14.544	14.3271	14.4942	15.0826	14.359	14.0746	14.1557	14.4808	14.5925	14.3164	14.1847	14.8548	14.5479	13.9949	14.4063	14.4438	14.9031	14.4723	14.3397	14.0219	14.7462	13.9989	14.1741	14.1836	14.5434	14.6548	13.9612	15.2533	14.381	14.0169	14.3481	14.309	14.5097	14.6108	14.2511	14.4751	13.6878	16.3638	14.629	14.8089	13.7191	14.4733	14.6807	14.8618	14.513	13.9088	14.7545	14.3218
NDUFB1	13.6618	13.556	13.4849	14.4105	14.4503	13.0333	13.6729	13.6038	13.4291	13.5959	14.6078	14.2799	13.7119	14.1523	13.4312	14.0258	13.7153	14.6255	14.2289	14.389	13.141	13.799	13.6608	15.1169	14.5477	13.1471	14.0311	13.7628	12.8384	14.2371	13.9239	13.7866	13.7802	12.943	13.1067	13.5395	12.0518	12.3529	13.5396	13.7969	14.8176	14.4259	14.374	13.6852	12.7703	14.0429	14.5318	14.1177	14.2026
PMPCB	13.542	13.4248	13.6544	14.2165	13.9328	13.9813	13.5676	13.2741	13.4579	14.2598	13.509	13.5943	14.0704	13.7868	12.9195	14.3534	13.5609	13.9504	13.4592	13.8534	14.0319	13.5226	13.7305	13.6395	13.6108	13.8285	13.4583	13.4609	13.601	13.0617	13.8681	13.414	13.304	14.1341	14.3401	14.0941	14.1827	13.1704	15.1899	13.0132	13.7569	13.2212	13.5354	13.891	14.552	12.7973	13.4199	13.9064	13.871
MED24	12.1808	12.5693	13.5846	12.0916	13.9187	12.221	12.5711	12.2517	12.4043	11.8179	13.8105	13.071	14.3827	14.3367	12.8618	12.6658	12.729	12.3583	11.8124	11.4345	12.2534	12.4355	13.2894	12.5316	12.8433	13.1865	13.3475	12.2794	12.6213	12.1111	12.0685	13.5821	11.8881	11.4958	13.0193	12.0844	13.2844	11.9398	16.9248	12.998	12.1911	11.2771	13.1788	12.5053	12.4887	8.87134	11.7787	13.4664	13.2214
PSIP1	12.0817	13.2835	12.9378	12.7475	14.0906	12.1977	11.8056	13.3067	13.1355	12.6776	12.9972	13.1336	14.7389	12.6158	12.9427	13.2926	14.2204	12.3267	12.151	12.4945	12.9162	13.1511	12.7004	12.8008	13.4875	12.5186	13.428	13.2943	12.5362	12.646	12.8241	13.0178	12.2773	12.1984	12.2938	13.2344	11.8567	13.8916	16.615	12.7287	13.4236	13.8579	13.0453	13.3932	13.7477	11.9043	12.0336	13.1551	13.7096
ERLIN1	15.6508	15.7591	15.0614	15.6862	15.3267	15.5135	15.4514	15.4754	15.2579	15.6587	15.6346	15.0283	15.6033	15.7419	15.2571	14.9327	15.2413	15.8825	15.3557	15.4268	15.5407	14.7323	15.7203	15.3267	14.7608	15.5788	15.8295	14.4317	15.7579	15.37	15.1028	14.9543	14.5425	15.469	15.7432	15.5567	15.6132	14.8589	15.1303	14.9182	14.4777	14.9425	14.9252	15.5676	15.8732	15.0001	14.9268	15.3186	15.0598
GPC4	12.6796	13.6801	12.6854	12.7925	12.6211	11.8909	12.9215	12.3233	12.0074	12.331	11.9139	11.8464	11.6948	12.0279	11.7804	11.9189	13.8066	11.9624	12.6072	12.2498	12.0708	12.8079	11.3284	11.5609	12.2059	12.3855	12.5658	12.4291	12.5307	11.7942	12.0742	13.1983	12.5857	12.6622	12.8156	12.4804	11.9426	13.173	12.2093	12.1893	13.046	11.2643	13.0518	13.9722	12.9482	10.9509	11.8742	10.9063	12.5697
NDUFS3	14.2323	14.3435	15.0795	15.5219	15.1377	14.8832	15.0699	15.1075	14.9767	14.8776	15.0624	15.1961	16.2958	14.9833	15.0003	15.073	15.3532	15.4011	14.9911	14.918	14.8515	14.8478	14.4604	15.3975	15.0983	14.8451	15.5047	15.4407	14.6688	15.1631	15.5802	15.5015	15.3043	14.349	14.2104	15.478	14.734	15.4209	15.2683	14.9411	15.9851	15.0793	15.1835	15.521	15.4805	14.9964	15.371	14.8401	14.8914
SRSF10	14.8057	14.852	14.6085	14.3819	15.3867	14.441	14.2745	14.1672	14.9196	14.8077	14.9798	14.8063	15.2668	15.0498	14.9775	14.9802	14.7737	14.6553	14.5648	14.6722	14.855	15.1239	14.5425	14.8239	14.8819	15.023	14.7013	14.9473	15.1678	14.9825	14.808	14.6818	14.9138	14.4248	14.2202	14.0987	14.8389	15.1683	16.1366	14.3792	14.9519	15.347	14.7926	14.0209	16.0297	14.222	13.7165	14.8158	14.9417
HSBP1	13.4634	13.4809	13.9403	13.5134	12.9174	13.7408	13.9406	13.6367	13.8414	13.2195	13.4225	13.4858	12.4755	13.346	13.9079	13.8034	13.5512	13.0607	13.6184	14.1922	13.8894	13.6642	13.5553	13.8705	13.7736	13.704	14.2566	13.5988	13.3747	13.946	13.7573	11.6477	13.5294	12.1434	13.6026	13.3827	12.3677	14.0077	13.5739	12.441	13.7412	13.8176	13.6337	13.7667	14.1424	14.3172	13.5233	12.6457	14.1302
ECI2	13.7236	12.8248	13.5564	14.1093	13.9919	14.0958	15.0648	13.1404	14.5608	13.5393	13.3266	12.439	14.0423	13.2918	13.5222	13.1351	13.2254	13.6289	13.4945	12.8761	13.7139	11.6674	12.9342	13.5022	13.5018	13.0794	14.4127	12.6244	13.7233	13.9424	14.0377	13.7072	14.266	13.3542	13.5843	13.0697	13.3538	13.971	12.7829	14.2209	11.974	11.3882	13.6815	14.2524	14.4868	14.5356	12.4267	12.9098	13.6587
BANF1	14.3928	14.6512	14.4661	14.8665	14.9786	14.5722	14.6069	14.8853	14.8316	14.8424	14.6199	15.1936	15.2281	14.8838	14.1713	15.3057	15.3775	14.4596	14.3739	15.4897	15.3128	14.6704	14.2559	14.5571	14.7787	14.7303	15.1082	14.9872	14.7576	14.8554	14.8905	14.9609	15.7746	14.9355	15.5792	14.81	13.9961	14.8904	15.6787	14.8816	14.926	15.0653	15.0577	14.9643	14.7709	15.0427	15.1262	14.6974	15.3048
SF3B1	15.572	15.834	16.6698	15.8615	16.408	15.7404	15.1556	15.9573	15.9434	16.1123	16.4252	15.5683	16.0614	16.3009	16.0205	16.0535	16.5966	15.843	15.7387	15.7803	16.2213	16.1435	15.8374	15.798	16.0354	16.069	15.8271	16.04	16.2419	15.7979	16.0175	16.5384	16.0784	15.7724	15.8647	16.4147	16.2252	15.8585	17.5661	16.6107	16.0672	16.4302	16.2346	16.7385	16.4804	15.6045	16.0679	16.4977	16.4884
CSDE1	13.7989	15.2696	15.3285	14.5206	14.4567	14.1359	13.8143	13.6816	14.1657	13.9895	14.2419	14.4941	16.2735	14.3419	14.1748	14.2676	14.1276	14.1833	13.3863	14.5088	13.2478	13.9456	13.4161	13.8151	14.0602	13.8287	14.3999	14.4138	14.0909	14.0216	13.9183	14.5848	14.1741	14.2663	14.2638	14.6463	14.1811	12.5035	12.812	13.3602	15.4453	15.759	14.8944	14.5817	13.9322	14.5088	13.9485	14.1737	14.4129
PRKRA	12.8671	13.4617	12.1056	12.8309	12.522	12.7718	12.9534	12.1732	12.8145	12.8671	12.6982	12.2632	11.6686	13.3193	12.1809	12.535	11.4362	12.7713	12.3311	12.9052	12.8313	11.9714	12.2774	12.218	12.1175	13.2076	12.7274	12.1988	13.4153	12.7322	12.0767	12.5459	12.5566	13.0038	12.9587	11.8889	12.2944	13.2286	15.9111	10.4233	12.9903	13.029	12.2678	13.2257	13.3148	13.1054	12.8081	12.716	12.9122
MYCBP2	14.3863	12.7498	14.1381	13.9017	13.8909	14.0389	13.3234	12.7537	13.7611	13.0281	14.3225	13.2345	12.2669	13.8448	13.4828	13.4475	13.1446	14.335	14.1172	14.2435	13.5644	13.799	12.8162	14.6538	13.4919	14.1779	13.9559	14.1422	13.2076	13.9702	12.871	14.1307	13.6457	14.3788	13.6456	13.9568	13.537	13.838	13.2945	13.6435	13.0923	15.6966	12.2658	13.844	12.8523	13.9712	13.5664	13.9997	14.0054
PGLYRP1	10.3626	13.1414	13.1109	11.8282	13.8733	12.5912	14.2052	14.5224	14.1186	11.2443	13.2077	15.0514	13.9862	12.4266	14.0185	11.0291	12.6468	12.784	11.5538	14.1056	10.9985	13.4588	13.0958	11.3775	12.3836	12.7195	12.5829	10.2056	12.6433	14.6807	13.761	13.0794	12.2762	12.7391	10.8559	11.721	11.6979	10.0961	13.8617	13.896	14.3249	11.6789	12.5333	13.5322	13.6425	15.9689	12.7012	12.4745	11.9141
NPM3	11.8484	11.3341	12.2957	11.4653	11.4981	12.1918	12.515	12.0254	13.1726	10.6219	12.0415	12.6978	12.4377	11.6029	12.1071	12.6277	12.2642	12.8276	11.3651	12.6641	12.2796	11.3318	11.7638	11.2884	11.8694	11.0675	12.6952	11.2995	12.8935	11.5025	11.7844	12.2609	11.6763	11.4897	12.9642	12.1581	12.4297	11.9029	14.8648	11.7234	11.4739	12.7523	11.2014	11.5912	13.2786	13.0617	11.6509	11.5969	11.4326
LYPLA1	15.3335	15.5989	14.5061	14.6904	14.699	15.0247	15.2597	14.9661	15.1651	15.2439	15.6935	14.1802	15.7565	15.1563	14.6422	15.656	16.0883	16.4696	14.6715	15.6478	15.3903	15.2214	15.1319	15.0339	15.589	14.8682	14.8258	15.3635	13.8975	14.3946	14.8259	14.2522	14.6687	15.5201	15.8538	14.8014	16.0775	16.2759	16.5255	14.2382	15.2441	15.3385	13.9969	14.4059	15.6878	14.7622	15.499	14.6585	14.8151
SNRNP200	16.6423	16.679	16.7983	16.6678	17.3945	16.5015	16.138	16.5918	16.3019	16.5825	17.3198	16.088	16.1904	16.9503	16.8624	16.8341	17.1421	16.8729	16.6421	16.2397	16.9947	16.9595	16.5525	16.6306	17.0636	17.1386	16.3689	16.9631	16.7868	16.4349	17.0715	17.2506	16.7358	16.4193	16.4734	16.8227	16.8731	17.0456	17.4216	16.6496	16.2901	16.6748	17.1247	16.8925	16.4798	16.1687	16.574	16.9301	17.2323
TIPRL	13.9581	14.6033	15.1419	13.7524	13.125	13.4321	14.0924	13.0938	14.251	13.879	14.0491	14.3064	14.0417	15.1786	14.9335	14.0735	13.8743	14.7048	14.3531	14.2313	14.3185	14.2508	14.6434	13.3249	13.4246	14.2269	13.7569	13.5964	12.9075	12.9208	13.6209	13.5686	13.7752	13.412	13.9668	13.8219	13.0634	12.7922	10.1198	13.4671	14.0833	15.1201	14.6884	13.947	13.5452	13.8431	14.598	14.3238	13.6268
RPS6KA4	12.8644	13.5947	11.9159	13.2887	13.2033	12.9498	13.0261	13.2541	13.1236	13.6457	13.3613	12.3884	7.65998	12.8155	13.1501	14.7824	13.2549	13.1127	13.264	13.5647	12.7492	13.0563	13.0347	13.2368	13.1391	12.7333	13.7623	13.2079	13.6959	11.519	13.408	13.6592	13.7316	13.2998	13.6358	13.5834	13.018	12.0827	11.8793	12.3851	13.6105	13.5513	13.1211	13.5514	12.0678	14.0779	13.2866	14.0672	13.3786
SURF6	13.0858	13.2383	12.8819	12.8862	12.4734	12.215	12.8333	12.4654	12.8275	12.7714	13.0544	11.5154	12.2841	13.0173	12.8725	12.4426	11.6536	12.8989	12.9502	11.7239	12.967	13.1582	13.1736	12.8864	12.9952	13.4591	11.838	12.2445	12.1147	13.3033	11.6728	13.1051	11.9081	12.6522	13.2174	11.8496	12.1846	11.8967	17.4418	13.3987	11.7471	12.6216	12.6485	11.7915	11.5444	12.6019	12.5826	13.2726	13.5136
PPM1B	12.5073	12.5878	12.0576	11.6553	11.8026	12.4615	11.6599	11.5904	11.7946	11.5964	12.3953	11.8774	12.4725	12.4984	12.3944	11.6872	11.2548	12.5582	11.4615	11.864	12.0839	12.5531	12.7735	12.8949	11.6264	12.826	12.2708	10.0717	11.6472	11.5969	11.4971	12.4925	12.6271	11.6956	11.879	11.6444	12.6699	12.8592	15.9006	12.1445	12.0569	10.581	12.3529	12.7468	12.4639	12.8212	12.7055	12.9245	12.2095
UTP20	14.898	15.0315	15.519	15.5033	14.3638	13.6576	14.9172	14.5158	15.4191	14.2038	16.1355	15.8592	15.227	14.8214	13.5647	14.825	15.0306	15.0025	13.6849	14.75	13.629	14.3801	12.5639	13.5347	15.119	14.1108	15.1091	15.116	15.699	14.241	14.3782	15.7361	13.5066	14.7109	16.1109	14.9638	15.847	13.5538	14.8882	15.0706	14.5636	15.1129	15.1721	14.7263	15.4895	13.1857	15.1069	14.7537	15.7248
NUP155	14.7423	14.968	15.1258	15.7803	15.5166	15.2065	15.5696	14.6547	14.9993	15.4725	15.4705	14.4535	15.7583	15.6617	15.5541	15.3668	15.1268	15.6208	14.7663	14.8142	15.1654	15.0245	14.9264	15.0625	15.1733	15.5882	14.9983	15.39	15.3564	14.6069	15.4609	15.2263	15.0469	15.3854	15.3701	15.7311	15.7032	14.5479	16.599	15.2217	15.4087	15.4461	15.2385	15.5962	15.127	15.512	15.2944	15.2121	15.3959
RP2	15.2879	15.8514	14.895	14.8763	15.0581	14.2468	14.4316	14.5529	14.0354	14.6212	14.6551	14.1463	13.2581	14.3123	14.2031	13.7455	14.0151	14.0798	14.7076	14.5393	13.6235	14.381	14.8507	14.2026	14.2573	13.9422	14.9397	14.6953	14.2922	14.868	13.8392	14.7874	14.631	15.0414	15.0047	14.5331	14.8058	13.896	12.3612	15.0395	13.9508	14.3386	15.0566	13.9473	14.2231	14.8905	14.4985	14.9372	13.8368
CRTAP	13.1297	12.3153	12.4769	11.3434	11.1368	12.0019	13.1283	9.93418	11.8518	11.3366	11.4417	12.7974	11.3084	12.0557	12.7943	12.7131	11.7462	12.0745	12.5608	13.1127	10.9817	12.3274	11.9123	11.2935	11.4553	12.064	11.7758	11.8115	11.5151	14.0761	11.7664	12.6777	11.4312	12.3597	12.1793	12.3516	12.1339	12.1804	11.6438	12.7013	13.1585	12.4815	12.2956	13.0435	11.3463	13.8797	12.6542	11.7745	12.2327
SLC25A12	15.4274	14.2727	14.3526	13.7626	14.0984	14.545	13.7629	13.9814	14.3891	14.369	14.2274	13.5471	13.8775	14.1525	13.2131	14.4889	14.6492	14.2856	14.021	13.7797	14.0042	12.7265	15.1921	14.3411	14.2087	14.5666	14.1958	14.4392	15.1434	13.511	14.0173	14.498	13.7342	14.3798	14.9372	13.9884	14.7838	15.8682	12.8782	14.165	14.0822	14.2583	14.0977	14.7153	14.8106	13.089	14.8533	14.6787	13.0454
ATP6AP2	14.4593	13.3412	13.6929	13.3334	14.5656	13.7097	14.2118	14.0833	14.1153	13.7955	14.6231	13.6847	14.9024	13.2765	13.5443	13.8242	14.056	13.106	14.102	13.9794	12.287	14.071	14.3191	11.9448	13.4988	13.3574	13.9511	13.9837	12.9473	13.2588	14.6088	12.8167	13.4063	13.0555	14.096	12.0925	13.8281	14.4901	16.6259	14.2313	14.4133	13.2027	14.2906	12.2751	14.7628	12.5531	13.6147	13.8163	13.4083
RNASEH2A	12.721	11.3121	13.3628	14.1275	13.9465	12.8107	13.1696	12.8624	13.6248	13.0577	14.1635	13.4369	12.8219	12.7642	13.1691	13.6245	13.8416	13.6077	13.8725	13.3854	13.5143	13.8664	12.0436	12.6205	13.4805	13.8557	13.2844	13.7792	13.7705	11.89	13.1525	13.5994	13.1752	12.9215	13.3254	13.8105	12.9847	11.7496	10.1272	13.224	11.1487	13.0615	13.2984	12.8758	13.8009	11.0163	13.4208	13.5539	14.0211
CDC123	12.9985	13.8123	14.2042	14.1643	13.7994	12.1652	13.6353	13.2967	13.5244	13.7271	14.7046	13.4068	10.4457	13.6125	13.5885	13.4608	13.8409	12.7529	13.1772	13.6788	12.5072	13.5265	13.3961	12.9691	13.209	13.4958	14.2141	12.3937	13.2964	11.7699	12.5849	13.6393	13.2438	13.7116	13.6418	14.4966	12.7322	12.6946	15.3825	14.5488	14.0505	13.3457	13.8941	14.0002	12.6012	11.237	13.7985	13.5565	13.6398
UGT2B17	15.3633	15.1415	11.0737	11.5086	11.8274	15.3767	19.8703	15.0573	11.4486	15.4268	12.353	14.4163	13.4341	11.0699	11.987	13.1496	13.1979	11.3496	15.9758	11.4371	17.5342	15.8477	14.6918	17.2734	12.5419	15.1345	14.3253	18.6733	12.9696	15.3428	12.3149	13.0653	16.0669	12.1928	14.7192	12.2085	14.8537	15.6639	10.6951	11.4941	13.5747	11.4613	15.8116	14.7689	16.1169	16.0486	13.8967	14.0861	11.8877
EIF3G	14.8618	15.2197	15.7382	15.5363	14.9189	15.4599	15.3738	15.2276	15.6262	15.4069	15.6565	15.7252	15.4152	15.5497	15.6854	15.8507	15.6405	15.4729	15.1928	15.6245	15.3519	15.406	15.2821	15.3826	15.2865	15.4101	15.4446	15.5075	15.61	14.785	15.3491	15.6922	15.2188	15.5055	15.246	15.375	15.6539	15.0307	14.9582	14.6068	15.2194	15.525	15.6555	14.5247	15.4563	15.0906	15.4919	15.7817	15.8229
EIF3J	14.4604	14.932	14.4004	14.3886	14.3129	14.3551	14.4327	13.8963	14.5006	14.025	14.4966	14.4389	14.0616	14.2957	14.6126	15.1035	13.8363	14.7627	14.0988	14.7016	14.3578	14.2332	14.1798	14.3067	14.2871	14.3459	13.9027	14.3653	14.2539	14.3372	14.2257	14.5741	14.2233	14.4245	14.6196	14.4599	14.5261	14.5089	15.8527	15.1066	14.1627	14.829	14.6491	13.6692	14.3302	14.2087	14.3372	14.6111	15.2191
CBR3	16.6929	15.7821	16.105	15.7555	16.0496	16.0337	15.8886	15.5612	15.7525	16.1618	16.28	15.8115	15.6478	14.8738	15.5117	13.0835	15.3823	16.4262	16.083	15.6351	15.9423	16.2602	16.4797	16.2578	15.9927	16.1696	15.5388	15.976	15.4287	15.9792	16.027	16.8628	14.6861	16.0751	16.7784	15.934	16.4757	16.4679	14.7248	15.0163	14.954	15.35	16.5099	14.9025	15.322	14.8222	19.6018	15.8241	15.0302
PSMD10	14.7679	15.4711	14.1683	14.4834	13.9135	14.6103	14.0613	13.6832	14.0455	15.2846	14.2945	13.7689	13.5613	14.2751	14.6191	14.7683	14.0617	14.5714	15.1625	14.6878	13.2451	14.7538	14.8846	14.3919	14.5402	14.8974	15.3508	14.0776	13.7325	14.1924	13.8198	14.3818	13.2195	13.9044	15.3356	15.5807	14.7586	14.3042	10.4415	14.5109	13.4736	14.4221	15.0937	13.9107	14.3209	14.1662	14.5557	15.1201	13.252
AP1G2	15.7411	14.6417	14.8704	14.1841	15.2502	14.594	14.6879	15.3435	14.4413	14.8612	15.0414	14.6205	14.8878	14.8025	14.7134	15.156	15.6137	14.6191	15.3323	15.0836	14.7836	15.0381	15.189	15.2178	15.6985	15.1513	14.932	15.7563	14.9343	14.9754	15.138	15.3115	14.4882	14.2051	14.8135	14.9597	14.5797	14.8236	14.5561	14.3199	15.3647	15.2633	15.1527	14.964	14.7491	14.8999	14.96	15.4317	14.7397
ZMPSTE24	13.1404	13.6783	12.5624	12.5903	12.4789	12.6901	13.2026	12.467	12.3107	12.6364	12.2454	12.5446	12.6884	11.8883	12.7548	12.8024	12.5337	12.5309	12.2659	12.31	12.5218	12.7732	12.3029	12.4225	12.5727	12.2463	13.1042	12.8437	12.3407	12.7488	12.8554	12.715	13.1812	12.7595	12.4388	12.5684	12.8869	13.2211	16.2862	12.3895	13.219	12.5434	12.7019	12.931	12.2736	12.3134	12.1341	12.6985	12.4673
IDH1	16.8552	16.069	16.2017	16.7488	16.0669	16.9521	16.1027	15.9668	16.8077	17.0873	16.5118	16.0419	17.3306	16.8537	16.8132	17.1382	17.4998	16.5226	16.4558	16.693	16.9868	16.6031	16.7843	16.5463	16.6111	16.9643	16.7511	16.4532	16.8976	16.3886	16.4619	16.5663	16.7575	16.8324	17.7153	16.5509	16.8837	16.0405	17.1218	16.0294	17.591	16.1777	16.7891	17.623	17.009	16.3315	16.3234	16.9725	16.0705
SCO1	12.9014	11.6901	12.9565	12.2764	12.7261	12.8421	11.8729	13.3307	13.0385	12.3603	12.4493	13.6075	10.9804	12.4916	11.8862	12.9627	11.0127	12.4821	12.7145	12.7193	13.661	12.6759	13.4821	13.1474	12.4299	14.0436	12.5083	12.6424	12.6872	11.4154	13.3491	12.9204	13.7086	12.9975	13.0628	12.4819	13.6746	13.6073	9.35787	14.1614	9.98593	14.0367	12.7473	11.8448	10.4112	12.6616	12.5782	13.1023	11.3704
ATRN	14.5998	13.315	16.1711	13.5498	16.2746	15.9614	15.4117	15.1148	13.9023	12.3111	15.5634	14.1674	17.038	16.2355	16.4781	14.2914	16.2788	15.7801	15.1691	14.4006	14.4043	15.8265	16.0832	16.5444	15.8194	16.6053	15.508	15.9902	15.9136	15.569	15.9731	13.7211	14.4808	11.7966	15.8289	15.3705	15.2686	16.3551	16.0072	15.6852	13.5426	15.1932	13.8958	14.7061	16.0951	15.582	14.5807	14.9429	15.2611
STAM2	14.5023	13.5069	13.8495	13.4649	13.3546	13.8136	13.4716	13.9935	13.9136	13.2604	13.1541	13.8154	12.2904	13.632	13.2083	13.8718	13.5879	13.0859	13.404	14.1539	13.493	13.3885	13.6159	13.7083	13.3091	13.3484	13.7988	13.452	13.5322	13.1647	13.3826	13.623	13.1672	13.9236	13.5445	14.3597	13.84	14.1915	11.2299	13.7652	12.2091	13.7537	13.4658	13.623	13.4463	13.8772	14.3494	13.6758	13.3145
ALDH1L1	12.0572	12.5313	14.0212	14.6598	9.38564	12.8768	12.8304	10.385	11.6963	12.0859	10.9557	11.5322	14.5147	12.98	11.4578	12.7176	11.143	10.284	12.3526	12.4426	16.0443	12.2212	11.9213	14.5994	13.357	12.8026	11.8836	11.691	12.9807	14.2246	12.7588	13.1784	10.8631	12.1132	12.6007	13.9111	12.7951	12.5373	8.17576	11.446	9.85692	9.85329	13.9969	14.9463	10.1217	13.0772	12.9052	12.3241	11.6785
CCNK	12.9806	12.1828	11.4372	13.3595	11.363	12.025	10.2693	11.8413	11.8375	13.5003	11.6464	13.1474	12.4657	9.27608	11.5575	12.6273	11.6341	11.563	12.0409	10.7381	11.2193	11.8173	11.9572	11.6437	12.4928	12.1936	11.2289	11.6802	11.2273	11.054	12.5676	11.0588	12.016	10.8291	11.5192	9.45484	12.4935	11.3935	10.5151	9.68317	12.0247	11.7769	10.5991	11.2231	12.7108	11.6917	12.5672	11.8877	11.82
DHRS3	12.9664	11.6818	12.6218	10.8066	13.014	13.0795	11.8035	11.626	12.333	13.1267	12.4009	12.6643	13.3796	12.1921	11.6177	11.7036	12.3152	12.7029	12.5119	12.6665	13.0633	12.651	12.3787	13.0725	12.5458	12.9789	11.8909	12.4973	12.3729	10.475	11.2423	11.2138	12.4699	12.7831	12.8749	12.7111	12.2727	11.2551	14.2592	11.7241	10.8838	11.7311	11.558	12.8743	12.6632	12.2189	11.9655	12.0461	12.0534
ARL6IP5	14.7179	16.8581	13.7086	14.4333	13.952	15.43	15.1619	15.831	14.0541	16.3245	14.4255	14.6733	15.9918	15.4152	13.4254	15.2761	15.001	14.6169	14.7864	13.9726	14.5448	15.0078	15.088	14.7871	14.2093	14.6713	15.0019	14.003	15.4396	15.0842	16.2709	14.7204	15.5627	14.8689	15.117	14.0829	15.1584	15.9561	16.906	14.8083	16.2846	13.6391	15.357	16.0483	16.2254	15.4395	13.6006	13.3948	13.7388
DYSF	15.264	14.6059	13.6552	14.1521	14.9081	13.5329	14.276	14.6733	14.3618	13.0603	14.053	14.7463	14.8432	14.1642	14.3564	14.2723	13.5551	14.4343	14.5064	14.6114	14.2259	14.1996	13.3003	13.0513	13.9398	13.4032	14.2016	14.1978	13.6423	15.1608	14.488	14.1474	14.0127	13.5607	13.8636	14.0869	14.0214	13.7699	9.42758	15.6067	14.2954	14.2976	14.2939	15.0014	14.928	15.2074	14.4162	13.7414	14.4865
BCAS2	14.3817	13.0265	12.4719	13.3154	14.2642	13.2422	13.2238	13.5758	13.6965	12.4471	12.5696	13.8775	15.0785	12.7333	12.8518	13.0318	13.4892	13.1358	13.545	13.0376	13.8518	13.5975	13.8208	14.0591	13.7319	12.8241	12.1081	13.8712	10.8582	13.0538	12.8638	13.4818	12.677	12.9957	12.5945	12.9085	13.7774	13.3874	14.7096	13.9551	14.4174	12.8778	13.2416	13.2431	11.631	11.7618	12.7894	12.2988	12.8938
DCTN3	14.5489	13.7392	13.3554	13.6404	12.4791	13.561	13.6529	13.5717	14.0218	13.6105	12.9548	14.2628	11.704	13.8519	12.8378	13.6369	13.0526	14.3856	14.0744	14.0806	13.6068	13.5252	14.4515	14.2891	13.3022	14.007	13.5754	13.7916	14.2425	14.1673	13.5774	13.6464	13.7509	13.9903	13.641	13.3206	13.4706	14.0418	9.21486	13.9007	11.6732	13.1322	13.4338	12.0492	11.8359	14.2317	13.8475	13.6715	13.4245
DNAJC8	14.7503	14.0361	14.6728	14.386	14.4207	13.9452	13.892	14.0608	14.7335	14.3276	14.6575	14.5963	14.6651	14.1075	14.1246	15.1342	14.3624	14.1946	14.3405	14.921	13.5741	14.684	14.6173	14.5309	14.3416	14.542	14.6839	14.2244	14.1817	14.9068	14.2086	14.9077	14.8528	14.5718	14.2344	14.0786	14.7074	14.3248	15.524	14.7782	15.1231	14.6096	13.7907	15.1284	14.2055	14.4915	13.9224	14.4673	14.0942
ATP5PD	14.6183	15.0985	15.3077	15.0334	14.858	15.8099	14.9328	15.0253	15.8015	15.5155	14.4951	16.1964	14.4657	14.3402	15.2972	15.678	15.5934	15.0574	15.9774	15.4143	16.045	15.3466	15.4369	16.2152	15.6993	15.854	15.5581	15.3312	16.2983	15.1464	14.7476	15.2417	15.172	14.7003	15.604	15.2647	15.9213	16.5635	13.1214	15.5289	15.8569	15.55	15.8967	15.6709	15.466	15.2786	16.265	15.8807	14.8502
FLOT1	15.3819	14.7762	14.9511	14.8673	15.873	14.9855	14.9013	15.8081	15.4349	15.4037	15.2862	14.8586	15.1142	15.1533	15.2543	15.3217	14.7572	14.9258	14.1332	14.9694	15.1613	15.6569	14.8034	15.3696	15.2671	14.9231	15.3684	15.0234	15.0137	15.3034	15.2715	15.0392	14.8164	15.4051	14.9827	14.9738	15.2101	15.7191	13.9875	16.5105	15.2619	15.061	15.2482	15.4163	15.2484	15.6273	15.3664	15.0065	15.1133
TRIO	11.6627	7.08709	11.2932	12.0959	11.1357	11.5373	11.5443	11.7994	13.168	12.147	12.7851	11.7814	12.388	11.6182	11.1601	12.3589	11.7835	11.6447	12.1539	12.5533	13.0446	10.9762	10.843	11.4941	12.6058	11.2656	12.6588	12.0597	12.1587	14.0382	12.438	12.5924	12.7358	12.0706	11.3344	12.28	11.1435	12.2065	11.2417	10.9311	13.5535	12.7008	13.2981	12.513	12.9566	11.7159	11.3044	11.9569	12.0164
ATP5MG	16.1707	17.0682	17.0433	17.1654	17.4376	17.5733	16.4487	16.8497	17.2657	17.3402	16.3034	17.5174	16.18	16.5556	16.7825	16.9517	17.0485	16.6642	17.736	16.9921	17.6634	17.0311	17.184	17.9153	17.4145	17.3724	17.1449	16.6945	18.0409	16.8662	16.2524	16.8444	16.9498	16.4954	16.964	16.528	17.4416	18.2634	17.1983	17.14	16.4794	16.8165	16.9074	17.8617	17.007	16.9995	17.4792	17.2308	16.5317
CPD	13.873	14.0804	13.7623	13.7352	14.8027	14.4135	13.3145	13.5919	13.5943	13.9667	14.2307	13.1049	13.0619	13.9997	13.5111	14.1293	13.6006	14.4461	14.3477	13.781	13.8739	14.1457	13.924	14.0017	14.0146	13.7564	14.5517	14.0071	13.5393	13.252	14.0207	14.903	13.2315	14.3813	14.3986	13.0909	14.4337	15.1701	15.2134	14.6174	15.0033	14.5381	14.2921	13.6373	14.4779	13.8419	13.3385	14.129	13.5127
GLRX3	15.5234	15.434	15.6928	16.2589	15.7228	15.5397	16.078	15.8489	16.2769	16.0064	15.8742	15.7441	15.3517	15.9251	15.8589	15.6466	16.1443	16.3142	15.7015	15.2842	15.0018	15.5206	15.5751	15.2057	15.674	16.2727	15.2528	15.3535	15.2286	15.5125	15.8222	15.9705	15.4772	16.2472	16.1535	16.3675	16.5901	15.605	15.6396	16.2111	16.3235	15.3478	16.0124	15.2754	15.3253	15.3265	15.8378	16.2038	15.738
RSL1D1	14.8793	14.6788	14.9822	14.7806	14.6067	14.3792	14.7964	14.3375	15.0641	14.4688	15.3454	14.6764	14.5128	15.0013	14.7113	15.1292	14.5482	15.0702	14.3929	15.0319	14.7323	14.9364	14.8025	14.5462	14.7855	14.783	14.4503	14.9406	14.525	14.5389	14.257	14.9695	14.6224	14.5507	15.3765	14.65	15.0377	14.6029	16.6366	15.0653	15.8025	15.3683	14.9325	14.669	14.4913	14.1645	14.7947	15.0784	15.2615
WFS1	14.9796	14.2716	14.0401	13.4032	13.9368	14.5311	13.8174	13.7493	12.8901	15.6225	13.4853	13.9431	14.1202	14.5446	13.2595	13.1735	14.6644	12.6631	14.3734	14.4338	13.6628	13.2827	13.0144	14.0102	13.5806	14.7171	13.3652	13.5988	13.4213	14.2755	13.6843	12.714	13.383	14.3718	13.46	12.8602	13.6349	15.0803	15.9636	13.9091	14.0006	13.3992	13.8676	13.9623	11.8105	12.4585	14.0624	13.0589	14.2359
CLPX	14.0648	14.3181	15.1681	14.3741	14.7286	14.1099	13.9317	14.0265	14.4822	14.1461	14.9729	14.3793	13.9549	14.7079	14.4897	14.5598	14.4441	14.232	14.1349	15.0209	14.1568	14.6934	14.0823	14.3148	14.4256	14.8706	13.8933	14.4963	15.2259	13.1948	13.8615	14.8983	14.3055	14.3385	15.0927	14.9242	14.8107	14.2575	14.5352	15.0599	14.2296	14.3953	14.909	14.6567	14.7933	13.7481	14.5018	14.6275	15.0349
SEC14L2	12.6137	11.9018	13.8386	10.7194	12.9452	12.4922	12.791	12.5709	11.2025	12.0288	11.8801	12.1751	11.5521	12.4637	11.2487	11.485	11.4162	12.4691	12.3267	13.1285	11.4916	11.8235	11.4981	12.0602	12.3459	12.6719	10.1627	13.4279	11.6765	12.2524	13.3353	12.3563	12.6906	11.6692	11.5087	12.4177	12.9331	12.9977	10.5498	11.4719	12.6354	13.2422	13.8934	11.6568	12.8994	11.3121	13.3564	12.5408	12.0088
SRP72	14.8489	14.1068	14.424	14.3744	14.6002	13.9957	14.3027	13.97	14.2089	13.9617	14.2523	14.4285	14.3251	14.3418	14.2315	14.2358	14.4848	14.2345	13.8206	14.4459	14.1449	13.9862	14.0794	13.7966	13.8449	14.3982	14.318	14.1709	14.3412	14.5419	14.228	14.3589	14.2505	14.0229	14.1245	14.4142	14.2199	14.0219	14.9819	14.3289	14.8885	14.2759	14.6517	14.4591	14.3758	14.156	14.4839	14.273	14.3053
DDAH1	16.2971	15.0221	15.1275	15.4176	14.9547	15.7446	14.2075	14.7413	14.4735	16.5179	15.745	14.8186	15.204	14.1586	14.4211	14.4543	15.0365	14.8527	15.1128	15.8263	16.1951	14.9918	15.6215	16.019	15.5062	15.0777	15.6739	16.3769	15.1332	14.4646	14.8416	15.2156	15.4036	15.6854	15.2839	15.5961	16.0717	14.5989	14.5637	14.0072	14.3425	15.3916	14.619	15.6574	15.254	14.7059	15.5537	15.3431	15.0051
URI1	15.6222	12.2078	16.2718	17.1288	12.6411	15.8533	13.6213	14.1259	14.4624	16.4314	16.0838	18.393	16.6773	16.0888	16.397	15.0871	14.7628	15.4776	15.0506	16.8697	15.6608	15.491	15.4217	15.609	12.0921	15.7618	14.4043	12.4253	12.8953	15.6021	15.8356	15.9331	15.1811	12.9275	15.8431	16.7	12.0463	13.1765	13.3072	16.2307	13.2733	16.501	9.66496	12.6374	16.1062	15.6859	14.5354	15.1118	13.0396
MTA2	14.1643	12.7196	15.1788	13.9716	15.5625	13.9749	14.1383	14.3228	14.0021	13.7507	15.5536	14.731	14.1197	14.6096	14.6987	14.7791	14.4329	13.615	14.2117	14.6632	14.2716	15.3661	13.8924	14.8031	15.245	14.2967	14.0361	14.484	13.8601	14.1739	13.9054	14.6473	14.303	14.6099	14.0346	14.5863	14.8977	13.3427	12.5223	14.9539	15.2691	13.2443	14.7092	13.5502	13.2672	14.4757	14.3269	15.4086	15.1938
STK10	14.3126	13.2953	12.3381	13.7411	13.7956	13.4616	14.3156	14.7828	13.8192	13.5401	13.4913	14.2439	14.7528	13.3223	14.3631	13.899	13.9817	13.3292	14.2496	14.2457	13.3543	13.37	13.4099	14.0986	13.6363	14.0173	13.8133	13.7065	13.2149	15.1461	13.9449	13.9834	13.9934	13.6986	13.4416	14.4742	13.3659	13.4328	11.258	14.3751	14.5092	13.3311	13.8174	14.8931	14.343	14.7241	13.9644	13.5644	14.6338
KBTBD11	13.7656	13.8476	13.4937	13.3792	14.2711	12.5638	12.8617	13.9325	11.6458	13.1465	13.5971	13.367	14.3847	12.7346	12.2521	12.1684	14.017	13.7482	13.9128	13.7828	13.5555	12.1229	13.8791	14.046	13.9125	12.3463	13.6208	13.7052	13.6044	14.5529	12.5221	13.5205	12.4124	12.4544	11.8411	13.413	12.7339	12.9237	10.7025	13.6752	12.6236	13.7475	14.0436	13.0222	13.8017	14.4727	12.4416	13.6688	13.524
LTN1	12.9836	13.4764	14.03	12.9449	14.0725	14.1302	12.482	13.1636	13.8548	12.8381	14.0756	14.1284	14.1713	13.9166	13.6408	13.5991	13.7983	14.0527	13.3254	13.1928	13.4465	13.5884	13.5754	13.4824	12.9127	12.8056	13.5727	13.6268	13.145	13.5237	13.5944	12.4158	12.6551	13.5369	13.6185	13.7884	13.5139	14.0593	14.8856	14.7242	14.1774	12.8912	14.2907	13.4239	13.8007	13.2367	13.0637	13.1981	12.6406
TOMM70	14.2407	15.1809	14.9779	15.2519	14.9587	14.8698	14.8754	14.1969	15.0391	15.0536	15.4753	14.5554	14.7203	15.4467	14.7976	15.0031	14.8631	15.0787	14.9108	14.9459	15.082	14.7835	15.4511	15.1884	15.1875	15.4791	15.4366	15.0168	14.9199	14.7967	14.3939	14.9376	15.0821	14.7212	15.4637	15.045	15.4977	15.0579	14.8134	14.946	15.0625	15.3184	14.4234	15.1449	15.3056	14.3569	15.0649	14.7139	15.3473
MYO1D	16.1663	15.2107	15.3183	16.4007	15.4394	16.1899	15.0531	14.73	16.3321	15.0838	16.6751	15.1088	16.7138	14.8218	14.5192	15.2202	16.7	15.4678	15.5968	15.42	15.8366	15.1024	16.0318	16.1487	16.612	15.0085	15.7948	15.941	15.6106	15.393	15.4335	15.3766	15.673	15.9618	15.4178	16.1534	16.7041	14.6676	14.7388	14.507	16.4728	15.8241	15.4392	16.5891	16.6457	15.9409	16.0772	14.7504	15.0453
MICAL2	13.182	15.7627	14.3237	14.3822	13.5644	13.8562	14.4644	14.5103	12.5945	13.9178	14.2031	13.5988	13.0143	13.9809	14.6531	13.8579	13.5511	14.3961	14.1686	14.364	14.4182	14.2343	13.6954	13.7188	14.0764	14.4821	14.4595	13.8755	13.4394	15.3059	14.0553	14.269	13.9597	14.2442	13.7254	13.6506	14.3522	13.4884	15.4302	13.9871	14.1486	13.8756	13.9638	14.4625	13.8186	14.8885	13.1476	13.8733	14.2976
SEC24D	13.7827	13.7049	13.7763	13.3386	13.9785	13.469	13.7921	13.5312	13.6977	13.2874	13.2872	13.7886	14.2056	13.5675	13.4057	13.1821	13.8077	13.4447	13.5303	13.9374	13.5808	13.3281	13.3355	13.0638	13.2979	13.7224	13.5999	12.8826	13.6184	14.6357	13.4098	14.0189	14.3542	13.3639	13.0653	13.7729	13.6301	14.4215	14.5814	13.8711	14.602	13.3292	13.9406	13.9945	13.6949	13.7327	14.0717	13.4381	13.4649
UFL1	15.4616	14.7629	14.3416	15.3671	14.8103	15.0632	15.1173	15.1758	14.6775	14.6244	15.1776	14.7398	15.7481	15.2082	14.4246	14.1444	15.684	14.7525	15.0381	14.7863	15.643	15.3409	14.9526	15.0368	15.3037	15.3499	14.2523	15.2462	15.4426	14.4033	15.0377	14.59	15.165	15.1748	15.1455	15.2388	15.2892	14.9666	15.3376	14.3994	15.3347	15.2075	14.7174	15.1378	15.1836	14.671	15.4064	14.6729	15.1769
SORBS2	13.2358	13.7433	12.5546	6.06877	12.7809	14.4589	13.4035	13.6406	11.7699	13.7996	12.0901	8.33942	12.3272	12.492	12.612	13.1627	13.6025	13.1115	13.7112	12.4911	14.9066	10.8981	14.3025	14.7803	13.0404	13.3614	12.4883	15.2629	14.046	11.9185	13.7128	13.0356	12.5185	13.106	13.0498	12.3524	13.5655	15.3439	15.9981	12.0406	1.70123	14.124	13.7853	11.9887	12.3273	13.6987	13.3993	12.0497	13.2521
PHF14	13.3434	14.6669	13.1931	11.8117	11.823	12.3809	13.0281	11.9791	12.1929	11.8436	12.7235	12.1467	12.0763	12.1496	11.527	13.2534	12.3944	11.4715	12.119	12.8717	11.9586	11.2578	11.9444	12.8293	12.6829	11.9901	11.95	12.2532	13.6595	11.8948	11.9669	12.6405	11.8425	11.8306	9.26896	13.0363	11.536	12.1457	16.2318	12.1426	14.8207	13.9633	12.1686	14.7898	12.792	14.8193	12.4932	13.1748	13.6139
TMEM63A	15.6469	15.3175	14.7463	15.0345	14.9482	14.8375	14.6727	14.737	15.3273	15.4249	15.1645	14.7758	13.9567	15.6804	15.8275	15.1997	15.2516	15.2374	15.7485	14.2794	15.1874	15.1999	14.8863	14.834	14.8312	14.6607	15.8447	14.5903	14.735	14.9261	15.2287	15.0024	14.8057	14.9637	14.8233	14.2064	15.2998	13.1701	16.2288	15.0366	14.6574	14.8729	14.5648	14.5513	13.8504	15.4111	14.0183	14.6493	14.7128
FARP2	13.2986	13.1694	11.9978	11.8791	12.739	13.3264	12.3089	12.703	11.337	13.42	12.2525	12.6977	13.0109	11.5487	12.1373	12.3798	12.546	12.7492	12.8838	11.6347	12.9637	12.3635	13.2721	12.8702	12.5781	12.9621	13.2808	14.3571	13.2807	12.4646	12.7509	12.6803	12.3585	12.7293	12.937	12.8339	12.925	11.9217	15.3403	12.0678	12.0908	12.4538	12.7209	12.4405	13.2035	12.5088	12.2139	13.0196	12.6124
UBXN7	14.2673	14.2755	14.1462	14.1762	14.5788	14.7471	14.0022	14.7935	14.595	14.3661	14.4587	14.1305	14.171	14.1286	14.8431	14.4392	14.7885	14.0668	14.3865	14.2964	14.8946	14.1455	14.2489	14.5548	14.4525	14.6179	14.2843	14.5965	14.514	14.499	15.4218	14.9513	15.1655	14.0009	14.5883	14.855	13.9039	15.5814	15.9941	14.6592	14.4142	14.9282	13.7495	14.5845	15.2965	14.3955	14.5579	14.2203	14.7948
SUN1	12.9498	13.9486	12.337	13.2184	13.8121	12.3761	13.5304	12.9333	13.3174	13.5178	12.897	13.0765	13.8611	13.111	13.0723	14.0783	13.8874	12.8068	13.0722	13.1156	13.6745	13.3694	13.8668	13.5258	12.8772	12.9023	13.067	12.8643	12.9972	13.5019	12.5218	13.5669	13.7937	13.8299	13.6025	12.5259	13.2046	14.1658	15.4819	12.2322	13.7312	13.1733	13.0582	13.4246	13.6672	12.7426	12.7307	12.9219	12.9131
PLPBP	13.3846	13.3444	13.6521	13.5761	14.6222	13.7395	13.2971	13.3573	12.8464	12.9671	14.3326	13.112	14.3883	14.4863	12.8633	12.1917	13.2751	14.46	13.5191	14.1781	14.0751	12.5348	14.16	13.8108	12.8629	13.0715	13.33	13.5813	14.08	13.5376	12.537	13.4389	12.1631	13.7582	13.7253	12.9655	13.5191	13.1401	15.4867	13.3648	14.7636	13.8081	13.1207	14.7383	14.3992	13.3337	13.4087	13.5192	13.4311
ERLIN2	16.151	15.6152	15.7433	15.5349	15.7525	15.502	15.462	15.5716	14.8914	15.4328	15.7517	15.0115	16.4416	15.8079	14.8753	14.9751	14.4865	15.6177	15.2367	15.6998	15.8457	14.7242	15.5802	15.3157	14.7713	15.4178	15.5446	14.8817	15.7594	15.9547	15.5119	15.5433	14.6807	15.6969	15.981	15.1471	15.7029	15.6923	16.3614	15.8066	15.1926	15.1807	15.2684	16.0121	15.1923	15.2915	15.2717	15.0937	15.2013
PRPF6	14.6287	14.6147	14.8807	14.6088	15.1431	13.9793	13.9098	14.3831	14.7936	14.0916	15.5451	14.6645	14.2985	14.7528	15.0026	14.98	14.5657	14.1853	14.7456	15.1539	14.9287	14.7889	14.403	14.4345	15.0635	15.112	14.9012	15.3093	15.3283	14.2892	14.7544	15.0973	14.7153	14.4428	14.2799	14.3725	14.9395	15.4722	12.8841	14.8704	14.5298	14.9064	14.7293	13.9887	13.9158	14.2663	15.0606	15.3713	15.7012
PCF11	14.0936	14.0134	13.4591	11.9028	13.2372	13.3178	10.4359	14.117	13.8739	14.712	14.9631	14.0563	12.2898	11.929	13.2696	13.9697	13.6526	11.5371	14.6913	13.6809	12.2865	14.9968	12.8599	11.7228	14.4978	12.7017	12.9727	14.4809	13.6216	11.5917	14.5494	13.9192	14.9189	14.1737	14.1335	14.3594	15.2095	13.0267	11.7582	13.3928	11.7097	14.0318	13.7687	12.3398	14.3897	13.9836	14.5961	14.3792	14.0555
FRYL	12.8124	13.1598	13.0527	13.2474	12.718	13.2071	11.9897	12.6969	13.1862	12.4269	12.4461	13.3236	12.9716	12.9312	12.1104	12.9888	13.3489	13.3647	12.066	11.9031	12.991	12.8355	12.995	12.8968	12.9291	12.4872	13.0311	13.1881	12.3157	12.3618	12.9264	13.2879	12.9317	12.6373	12.1321	12.3945	13.1162	14.0195	15.4474	12.4944	13.8684	12.712	13.1613	13.6554	13.9592	12.6143	11.6725	12.6354	12.3524
ENDOD1	15.1619	14.9351	14.5061	14.3441	14.3019	15.3533	14.9796	14.7412	13.4423	14.8048	14.2268	15.1364	14.6088	14.5316	14.2773	15.3378	14.6389	14.3936	14.6246	13.9939	14.4707	13.6304	14.2656	14.6888	14.2975	14.3245	15.4153	14.5386	14.3569	14.1418	14.0685	14.164	14.9535	14.6171	14.3884	15.0721	13.6192	14.3095	15.009	14.2053	14.7865	14.4617	14.4149	14.6205	14.633	14.8776	14.4106	14.3689	14.1577
GLCE	14.5952	14.2315	13.2426	13.014	13.7613	12.5712	12.3434	13.2658	12.2817	12.8941	13.3322	13.9305	11.6802	13.5112	12.7513	14.7439	13.8134	13.2081	12.9353	12.7722	12.8668	13.313	13.7565	13.6998	13.0076	13.3163	13.087	12.882	12.9364	12.9017	13.1553	13.0521	13.0598	12.9976	13.4287	13.0975	13.7739	13.3887	15.462	14.3393	14.4136	13.1858	13.5519	13.8174	14.0837	12.6117	12.7303	13.553	13.345
GLS	13.7301	14.8889	14.2669	13.2443	12.7053	13.2132	13.9733	13.7714	13.9011	14.4194	14.4566	13.9648	14.9659	14.4806	13.3407	13.1352	14.0751	12.9163	14.233	13.9727	13.023	14.3777	12.151	13.5639	13.6636	14.9084	14.6628	14.111	14.6883	13.7731	13.7874	13.1746	13.8897	15.0864	14.6958	13.194	14.4704	13.581	10.2328	13.562	14.0713	13.4667	13.181	14.478	13.6735	15.0511	13.8758	13.8201	14.693
USP19	13.3807	12.5276	11.7189	13.0896	14.1834	13.3948	13.0377	13.1386	13.0749	13.5753	13.2433	13.0231	13.3115	13.525	12.6707	13.557	13.3049	12.8781	13.159	13.1611	14.266	13.0102	13.5499	13.5724	13.5581	13.37	13.0968	13.6085	13.4626	12.555	13.215	11.9986	13.5165	13.4051	13.4493	13.6107	13.2939	13.6023	8.75447	12.4237	10.8273	12.9469	13.2112	12.0356	12.4786	12.2463	13.3347	12.8901	13.2974
AP2A2	15.3774	15.5706	15.2317	15.0225	15.3061	15.4519	15.3138	15.1599	15.5539	15.4557	15.4216	15.3514	15.0609	15.4239	15.4498	15.4857	14.9505	15.6216	15.2302	15.32	15.2579	15.5231	15.2098	15.1846	15.3418	15.2734	15.2478	15.322	15.2224	15.0303	14.8677	15.165	15.3113	16.0292	15.4599	15.1749	15.1706	15.188	15.6258	14.7263	14.4589	15.6064	15.2939	14.8913	14.9555	15.2181	14.2922	15.4879	15.5304
SEC31A	14.982	15.4997	14.7826	15.1771	14.7108	15.3496	15.3717	15.0233	15.0446	15.2489	14.9059	15.0002	14.821	15.0572	15.4063	14.4628	14.8133	15.3271	15.2399	14.9883	15.2565	15.0489	15.2492	15.1718	15.2879	15.2245	14.9777	15.0098	15.2319	15.6404	15.1918	15.6953	15.5669	15.2994	15.0476	15.2292	15.1728	14.9561	13.8825	14.9361	14.4623	15.2199	15.3236	15.1764	14.4275	15.5138	15.4507	15.035	15.2717
CLSTN1	13.3615	10.8771	13.6146	13.6352	14.3079	13.7919	13.4653	12.9136	12.2717	13.5701	13.5195	11.989	14.2287	11.8917	12.4706	13.826	13.4142	13.0553	12.7664	13.4925	12.0134	13.9574	13.8291	12.6983	12.8805	13.5963	13.3278	11.45	12.7077	12.9505	11.4948	13.2209	12.7262	12.2006	14.9705	11.4782	13.3909	11.788	11.8797	12.3948	13.3056	13.6686	13.1189	13.5302	12.6463	10.7382	13.0381	13.2708	12.741
HEXIM1	9.33404	11.7276	13.3403	11.7301	11.7586	11.5596	11.3971	12.9559	12.6564	11.6043	11.8051	12.7804	12.2985	11.8621	12.907	11.4114	11.968	12.6751	11.0948	12.0238	12.4351	11.3554	11.8697	12.0426	12.4332	12.5697	12.2907	11.7276	11.4324	12.0341	12.7297	12.9127	11.6884	10.9293	11.4138	12.1671	12.6303	11.8939	15.2018	13.4853	14.0086	10.7261	13.5598	10.5617	12.271	11.688	11.421	12.3211	12.3856
TJP3	13.773	13.8768	13.2305	13.8451	15.1	14.2545	14.253	12.5078	14.9622	13.2085	14.1203	14.8805	13.6291	14.4244	15.0957	15.0269	12.8804	15.1171	14.1314	13.8916	13.4169	14.9565	14.3659	15.4072	14.0582	14.0418	15.0138	13.8122	13.7309	14.2548	13.6362	14.0908	13.6043	13.6485	12.3271	13.9186	14.6091	12.0841	13.738	13.1353	13.2683	14.3022	13.1471	14.802	14.0938	13.2725	13.7849	14.3281	13.9803
UBR5	13.9886	13.3935	14.0735	13.5574	14.3133	13.3696	13.4202	13.3525	13.5457	14.0015	14.2975	13.475	13.1334	14.2849	13.9724	13.7936	13.8893	14.2544	13.0043	13.9111	13.1784	13.8551	13.7673	13.5586	13.5807	13.4236	13.4904	13.8946	13.3641	13.0858	13.2212	13.4507	13.2077	13.7175	13.1413	13.9761	13.5896	12.7838	14.9093	13.862	13.8868	13.7936	13.7634	13.4483	13.1233	11.4531	13.7688	14.2206	14.0666
SCAF4	14.4252	13.7965	14.3517	13.5644	15.2645	14.7928	13.7709	14.5804	14.2967	14.7329	14.9837	13.7873	15.3738	14.5629	14.9597	14.3428	15.2396	14.3813	14.5056	14.4017	14.704	15.0671	14.2662	14.2095	14.6523	14.9098	13.4352	14.5918	14.4249	13.8243	14.3421	14.0789	14.697	14.6587	14.6509	14.866	14.5932	14.2748	16.1423	14.5792	15.1239	14.2745	14.1813	14.2847	14.8242	14.8855	14.05	14.3351	14.6938
NDUFB6	12.7893	12.6653	11.8426	12.5748	13.9545	12.9677	12.7363	13.9925	12.916	13.3146	13.25	13.5015	11.2951	13.3852	11.3076	13.194	13.5748	13.8057	12.0402	12.9437	13.133	12.7555	12.8803	13.6229	13.1036	12.0707	13.2419	13.5939	11.7512	11.5991	13.5116	13.4149	11.1698	12.623	12.4184	12.148	12.8134	11.8659	10.7599	12.4921	12.862	12.0502	12.492	11.823	13.0739	12.1699	12.9879	13.2831	12.7131
MFN2	13.4266	14.0782	14.3606	13.6841	13.5951	13.8815	13.6355	13.0995	13.5805	13.7201	13.7565	14.077	13.5575	13.2119	13.1784	13.6111	13.8729	13.7857	13.9021	13.0676	13.5321	13.4383	13.6291	13.9054	13.8841	13.4693	14.3379	13.8036	13.7544	14.7049	12.8142	13.4919	13.3278	14.4594	13.5125	13.549	13.8537	13.6115	16.1596	14.3856	12.3831	13.7067	14.6893	14.1694	13.6928	13.8417	13.926	14.0309	15.611
AKR7A3	13.2801	12.0278	13.613	14.0762	14.1022	14.2218	14.719	13.0356	13.9079	14.545	14.1384	13.9278	14.6229	12.1571	11.2362	13.5652	14.0709	14.5713	13.2736	12.9057	14.7363	14.0002	14.3964	14.4399	13.7909	13.4181	13.1704	12.1318	12.0588	13.7653	14.0863	15.0639	14.0995	13.0196	11.7046	13.3747	14.3076	14.284	9.65779	12.567	13.4097	14.1914	12.7456	13.2199	13.8102	13.3684	13.5656	13.6358	12.8889
UBE4B	13.5901	13.4711	13.6181	13.4984	13.4882	13.3646	13.3684	12.1425	13.4453	13.1637	13.0722	13.2288	13.5114	13.6035	12.6818	13.8925	13.0297	13.3576	12.8667	13.041	13.4601	12.7396	13.0937	12.8455	13.3107	13.0968	13.1802	12.4382	13.0467	12.8472	13.1082	13.4419	13.4715	13.4146	13.6743	12.6177	13.3478	13.7753	14.5402	12.7482	12.888	12.4546	12.9891	12.5528	13.0075	12.1983	12.9571	13.0579	12.375
ZFPL1	12.6515	13.4196	12.7446	12.7405	13.2768	12.0264	13.3332	11.3835	13.2922	13.8759	13.5929	13.5564	12.4952	13.0735	13.1594	13.7521	12.7847	13.9422	12.2345	11.5148	12.1443	12.5807	13.4681	13.7063	13.418	14.1092	13.7975	12.3312	13.3134	11.7548	12.2396	13.0244	11.6621	13.1723	13.4483	12.5249	12.5633	11.9946	7.40957	12.808	12.5571	12.7124	13.0597	12.0174	11.9109	12.6486	12.9592	13.8906	13.0457
ELP1	14.1082	13.7404	13.9244	14.0993	14.5623	13.8995	14.0026	14.0538	13.6111	13.4418	14.0749	13.9132	14.876	14.1147	13.5742	14.0694	14.1302	14.267	13.5609	13.9327	14.2006	13.782	14.1666	13.9613	13.7997	13.7699	13.9652	13.6647	13.8594	13.7368	14.2678	14.2152	13.7587	13.8905	13.5627	14.4154	13.9569	14.0001	14.5809	14.1851	14.217	13.7827	14.6826	14.8444	14.5389	13.8036	14.119	14.318	13.7721
NDUFB4	13.359	13.9941	14.1457	15.061	15.0864	14.0554	14.0995	14.4014	14.5779	14.0511	14.6926	14.1218	15.0977	13.8988	14.0519	13.9542	12.6548	14.9506	14.0393	13.8903	13.9573	14.1297	14.0244	15.6069	14.7758	13.4158	14.1836	14.409	13.6361	14.6651	14.6148	14.5762	13.9779	13.8516	13.6073	14.6334	14.0072	13.7931	10.0816	14.6077	13.0419	14.2787	15.0215	12.8851	12.8704	14.1851	13.9078	13.9329	13.8938
NDUFB8	13.343	15.2823	14.4909	14.7606	13.2292	13.2222	13.1291	14.9289	13.474	13.1789	14.643	14.4774	13.7756	14.6688	14.0486	14.4888	14.5739	14.8596	13.7853	13.9072	13.0268	13.8876	14.0695	14.7354	15.3306	13.0238	14.2883	15.1594	13.4464	12.8508	14.8783	15.0918	15.0988	15.7141	13.5382	14.115	13.3606	13.0389	8.35214	12.4944	15.0499	14.3711	14.8068	14.4262	14.4546	12.0869	14.2681	14.4541	14.8083
RTN3	14.6859	14.8941	14.8341	14.0985	14.2573	14.5455	14.1511	14.0379	14.4725	14.5818	14.3042	15.4452	14.6556	14.3263	14.5061	15.4011	15.0818	14.3417	12.8374	13.6056	14.9142	14.1839	13.8437	14.144	13.9062	14.0099	15.1619	14.1827	14.3775	14.5749	14.1205	14.3951	15.0075	14.2819	14.4074	14.0877	14.0883	15.0564	16.4221	14.1143	14.7073	14.6173	13.3304	15.0143	14.9942	14.9602	14.2048	14.3828	14.7947
LETM1	16.0135	16.6263	16.3416	16.1468	15.9892	16.5417	16.1058	16.0139	15.5513	16.6985	16.0664	16.2241	14.9782	16.0913	16.004	16.5742	16.8194	15.9186	16.1902	16.0703	16.3931	15.7591	16.8343	16.1443	16.0689	15.9666	16.1525	15.7945	16.4626	15.8623	16.3817	16.4122	16.0171	16.3087	16.2849	15.9145	17.2131	17.2871	17.5704	15.7645	16.324	16.4415	16.3047	15.7858	15.7018	15.7843	16.0674	16.3665	16.4622
STBD1	13.2372	14.5416	10.7707	13.0151	12.5687	12.7203	12.9409	13.1701	10.7943	12.9905	12.6613	11.2094	12.7055	12.7286	12.5361	13.2322	12.2885	12.913	12.8054	10.2246	12.1054	11.7181	12.6384	12.6304	12.2504	11.435	14.1381	12.7217	9.31586	12.6504	11.4442	12.2015	12.8403	12.5981	12.9312	12.1201	11.9766	13.5137	11.2702	14.8022	12.6326	12.3161	12.2699	11.8312	12.2975	13.6389	9.51856	12.6114	10.4549
ZRANB2	12.1128	11.3225	13.1127	7.66297	11.8633	11.0907	10.8088	10.776	12.3621	11.6021	12.4792	14.0629	11.3679	12.6676	12.4398	12.9967	8.45213	12.631	12.0046	12.4009	12.1011	12.0791	12.472	12.5994	12.2983	11.9958	12.3702	11.9581	12.6854	11.4925	11.5459	11.5357	11.5254	11.7474	12.2794	11.8971	12.4445	12.7247	17.0931	12.7762	10.0457	12.3128	12.8251	12.3325	13.368	10.0118	12.2666	13.1469	13.6185
SNX4	14.8188	15.0087	13.477	13.648	12.9458	14.6274	13.2838	13.7882	14.4598	15.0477	14.2008	13.378	14.5275	13.7143	13.2549	12.9391	13.5797	13.4963	14.6065	13.6806	13.584	13.6487	14.253	14.5281	14.0653	14.0364	13.8257	13.8656	14.0849	13.7351	14.3059	12.3879	13.7401	14.4739	13.9299	13.6675	14.3723	13.259	14.1768	13.0733	13.8849	13.7362	13.7684	14.435	14.9866	13.3135	13.4412	13.3248	13.3674
LUC7L3	15.1548	15.6847	15.8629	15.5281	15.694	15.4697	15.3619	15.7295	15.1001	15.535	15.8887	15.4318	15.7857	15.751	15.7525	15.5989	16.2123	15.6311	15.4821	14.9696	15.4673	15.6412	15.3306	15.5881	15.6665	15.699	15.4022	15.7342	15.4401	15.5629	15.7201	15.2504	15.6503	15.3285	15.7076	15.603	15.4161	15.9452	17.4696	15.3653	16.6541	15.9932	15.3069	15.7483	16.2276	14.4448	14.3096	15.4354	15.6057
KIF4A	14.2707	13.3111	14.8325	13.9928	15.0303	12.0308	14.2831	13.5918	13.8754	14.5693	14.6139	14.0609	13.1129	14.3038	14.5124	14.507	12.4986	14.0514	13.6803	14.5914	13.4934	13.9314	14.4231	13.7319	14.2026	14.0802	13.8845	14.4831	14.2186	11.4703	14.076	14.2732	14.0896	13.4772	14.5823	14.4361	13.9322	12.068	10.5985	11.8721	13.139	13.8309	14.4161	14.1949	13.6509	15.7357	14.0762	14.5973	14.8212
SBF1	13.7976	13.579	12.6461	12.0325	12.8053	13.9747	13.1518	12.7922	12.8471	13.5237	13.2519	13.2221	13.7727	13.8386	13.4432	12.6632	13.6181	11.5327	13.1389	13.5897	13.4721	12.9141	13.5	13.2317	12.9283	12.379	12.8915	13.1321	13.5811	12.0506	13.5792	13.0946	13.2466	13.2276	12.4274	13.641	12.6397	14.4722	13.3801	11.803	13.166	12.3984	13.0871	12.406	13.4383	13.9536	13.3445	13.639	12.6577
GOSR1	13.4735	13.4078	12.5977	12.8574	13.961	12.4565	12.2265	12.9057	11.893	13.1757	12.9402	12.5608	13.1702	13.9765	12.4095	13.5685	12.409	13.1383	13.1191	13.0318	13.0404	12.715	13.0255	13.2087	12.7051	13.0496	13.1986	11.9407	12.7512	14.1075	12.1085	12.6197	11.574	12.7487	13.2435	13.2404	12.7264	12.5192	7.27714	13.1591	12.3975	12.7294	11.9237	13.4185	13.103	12.6801	12.8758	12.4165	12.7197
KAT7	11.574	11.9187	12.0263	11.3962	12.128	11.9678	11.2012	11.6661	11.4783	11.4476	11.6494	11.6802	12.0348	12.5529	12.5285	11.3138	11.826	12.0143	11.5969	11.4878	12.1647	11.4835	11.6191	10.8394	11.7439	12.2131	11.6254	12.7493	11.4515	11.6123	12.1777	12.2913	11.6576	11.5114	12.215	11.5893	11.6814	12.3717	11.5339	11.2066	11.6228	12.6409	11.9836	10.4645	11.9957	11.4927	11.9578	11.9229	11.9723
ATE1	13.0052	13.0054	12.477	11.352	12.2349	13.305	12.9352	14.0348	12.3972	12.2933	11.5068	12.073	14.2806	12.392	11.3836	12.2759	12.5823	12.5687	12.8097	12.0151	13.1674	11.9454	13.0233	11.6458	12.4348	12.9386	12.4497	12.6264	12.175	12.7567	12.7221	12.1169	13.723	12.3764	12.193	12.4102	10.6082	12.64	13.6182	13.1151	10.8286	12.0641	13.0342	13.3683	11.2714	11.5953	12.7129	13.0196	12.1922
VAPB	16.1713	16.0843	15.5103	15.908	15.5094	15.8221	15.7922	15.5415	15.419	15.9659	15.9915	16.0153	15.1453	14.7867	15.2882	15.6612	15.9597	15.7532	15.8201	15.1836	15.6387	15.7672	15.6038	15.312	15.9579	15.8102	16.095	16.2145	15.8721	15.2985	15.7148	15.8134	15.8965	16.0673	15.9774	15.0814	16.2524	16.7043	16.4857	15.6575	14.9156	15.8283	15.4272	15.3027	15.2625	15.8881	15.622	16.1749	15.9067
SNAPIN	13.7417	13.5311	13.2556	12.7572	12.1024	13.3937	13.1932	13.2503	13.9271	13.5374	13.0779	13.8904	10.8296	13.1363	12.7113	13.0319	12.6096	13.1353	13.2477	13.9207	13.3678	13.3461	13.6385	13.0955	12.7599	13.3117	13.5729	12.879	12.941	13.6551	13.1666	13.603	13.4516	13.8423	13.368	13.3028	13.3672	13.5724	12.2866	14.4212	11.5673	13.6548	13.6469	12.8952	11.668	13.882	13.3085	13.2641	13.3069
NDUFA10	14.3798	14.754	14.0234	14.9922	13.9687	14.6087	15.1147	14.6252	14.5214	14.3963	14.6946	15.1272	13.4346	15.0501	13.6999	14.6918	14.15	14.8812	14.9114	15.0094	11.7437	14.3243	14.2942	15.8344	15.3005	14.4706	14.8889	14.8	13.7773	14.5631	14.7576	14.5792	14.9057	14.5472	14.82	14.7226	14.5803	13.0281	8.2409	15.08	14.1405	15.421	15.2792	13.2471	13.6144	13.2585	14.5849	14.2013	14.6192
FKBP9	14.1063	13.6174	12.2419	14.6068	14.0962	12.4117	13.9889	13.7335	13.372	13.4293	13.0714	13.5427	14.8357	12.8618	12.6034	14.1251	13.6094	13.4331	13.7061	14.2814	12.8166	13.1324	13.3959	11.9105	12.3942	13.2904	13.4287	12.7571	13.8553	14.4831	13.5445	13.6675	14.5902	13.5161	12.9743	14.0356	13.0696	13.4107	15.8859	12.7515	14.5444	13.5614	13.4159	14.9299	13.3014	14.4345	13.9478	13.2793	13.6401
CELF2	12.9829	11.9301	13.7243	14.2214	13.6717	13.1312	13.857	13.2109	14.3286	13.2313	13.7142	13.3573	14.1048	13.4907	12.9869	13.0041	12.5172	13.8706	13.2794	13.8854	12.9505	13.9583	12.4002	12.9343	13.1138	12.0894	14.483	12.8786	13.3299	12.565	13.3498	12.8608	13.6007	12.64	11.5921	13.9075	12.1624	12.888	12.492	13.3207	11.9862	12.2801	11.8384	13.9453	12.9927	14.7553	12.3762	12.6483	13.4375
PGLS	15.8789	14.7597	15.4088	15.4352	14.9247	15.815	15.5524	15.4568	16.1768	15.1004	15.6582	15.1264	14.9002	15.241	16.2127	15.475	15.4807	15.3042	15.921	15.404	15.6268	15.6543	16.316	16.1264	15.8167	16.0046	15.4512	15.3977	15.3132	15.7273	15.4406	16.0829	15.759	16.1226	15.5326	15.6015	16.1689	15.8863	15.6999	14.5811	15.5546	15.6108	15.4847	14.6665	15.1938	16.094	15.4617	15.2597	15.4697
PAPSS2	14.8545	15.1837	15.9155	16.7188	16.3999	16.284	16.2516	14.9525	16.1956	16.5563	16.2558	15.7174	16.0516	16.1949	16.4997	16.524	14.5777	16.3711	15.8507	16.4899	16.2384	16.0594	15.9143	16.1466	16.1497	16.2683	15.7964	16.5576	16.0797	16.3103	15.4008	16.4144	16.2467	15.9699	15.8857	16.6036	16.4106	12.5121	12.9449	15.5107	15.0569	15.2034	16.0205	15.974	15.4701	16.4281	15.8758	16.0528	16.181
SMC2	16.7383	16.2843	16.6481	16.4736	16.0502	16.4319	16.0729	16.007	15.3758	16.7923	16.806	16.3238	14.6587	16.9432	16.5237	16.6509	15.3704	16.7639	15.9741	16.8229	16.2284	16.3857	16.8555	15.9658	16.4551	16.6912	15.7459	16.6018	16.1183	14.4685	16.1724	16.5171	16.5011	16.4221	16.3722	16.4716	16.974	15.7526	14.9801	15.5292	15.6187	16.6236	16.5628	15.2992	15.6991	14.5466	16.0733	16.7393	16.6444
ATG7	13.7399	13.3413	13.2346	13.5465	11.9961	13.3395	13.2578	14.2735	13.5172	12.8805	12.849	13.8002	13.6963	13.7837	13.707	14.1914	13.5877	13.0076	12.9666	13.4106	13.7244	13.244	13.5154	12.9787	13.653	13.3229	13.2468	13.4605	13.6274	14.144	14.2985	13.4436	13.2793	13.6566	13.1818	14.1671	13.2285	13.5169	10.8918	14.2026	13.3976	14.0697	13.8118	13.0207	13.3328	14.4322	13.8281	13.7224	12.7298
TACC2	19.6685	22.0696	16.1726	17.2563	17.4246	18.8853	19.3727	19.6637	16.8392	18.5545	18.6768	18.5544	17.4233	16.9451	17.9862	14.3385	18.7099	17.2247	18.8954	18.7586	19.012	17.8758	17.7759	17.9248	19.0451	17.5588	16.2733	17.2171	16.9373	18.3459	19.5298	17.6269	17.1687	18.4539	17.4857	17.6875	17.6498	19.7714	7.70778	17.634	17.6454	20.9875	17.2187	14.4034	17.4005	16.1744	18.766	18.4653	17.9301
TRIM16	14.3462	13.5943	13.6031	13.5272	14.5085	13.6541	13.9082	13.4692	13.4818	13.8088	13.3144	13.2735	14.2897	13.3822	13.5162	13.5641	13.8471	13.7701	13.7899	13.7711	12.8888	13.984	13.3055	13.8106	13.1537	13.7122	13.6018	14.2566	13.2273	13.5899	15.1573	12.7669	14.0886	13.6026	14.2925	13.3653	13.194	14.8921	15.9035	14.5155	13.6794	14.5141	13.1557	14.2537	14.503	13.9295	14.3321	12.8635	13.2648
LYPLA2	11.4377	11.8442	9.05671	10.7091	8.85249	10.0116	10.1247	9.98855	11.2199	11.2203	9.83714	11.7253	10.7572	9.07636	9.37387	11.3705	12.2521	9.84756	9.54439	11.5431	10.0103	9.74778	10.847	10.4231	10.2301	10.5606	11.5956	9.45669	11.1556	9.61045	11.1597	10.5093	11.7585	12.5317	12.0629	11.2246	11.5459	12.8039	11.3959	8.81707	11.0807	11.6604	9.56248	13.6525	10.8415	11.1368	11.2189	8.68978	10.5565
IPO7	15.726	16.0813	15.6031	15.7099	15.7844	15.4223	15.3555	15.4557	15.0405	15.9584	16.2101	15.3781	15.7047	16.283	16.0308	16.1025	15.7737	16.2909	14.9829	15.2446	15.4546	16.1748	15.2994	15.5346	16.1546	15.3692	15.9059	16.4837	15.8077	15.1466	15.2707	15.4189	15.6584	16.2416	16.6833	15.7029	15.6596	15.2698	17.6427	14.3466	15.8263	15.6352	15.5186	15.8293	15.8926	15.1979	14.8712	16.2113	16.1143
SLU7	12.2429	9.03101	12.8628	13.1717	12.0879	12.3308	12.1719	11.6102	13.2492	12.6131	12.0406	12.3145	11.9546	13.1851	12.6761	12.1685	12.38	13.007	12.2173	12.6159	12.5394	12.7993	12.3549	12.4653	11.811	12.4491	12.1434	12.8988	12.1641	12.0774	12.5836	12.4395	12.309	11.8718	11.2037	12.8497	11.1802	11.4843	11.0535	13.2159	13.6453	12.2607	13.069	12.0951	13.2055	12.2631	13.1794	12.8284	12.6476
PGM3	12.4924	12.7957	14.8629	14.0064	14.3242	13.852	14.3732	14.0225	14.3899	13.5433	14.6503	14.0626	15.154	14.5113	14.2834	14.3059	14.4565	14.0883	13.1106	13.6378	14.5897	15.011	14.3276	13.9425	14.0439	14.0289	14.4288	13.7631	13.6347	14.5512	13.7564	13.4363	13.7264	14.0255	13.911	14.144	14.5682	13.1788	13.6302	13.3562	14.2671	13.6471	14.1493	14.7833	13.7849	14.6641	14.5945	13.7114	14.1484
GCNT3	11.397	12.3836	10.1959	13.362	11.8665	11.3082	12.3977	11.882	11.7697	13.3388	11.6318	6.83322	13.7532	10.9862	12.6919	12.5441	12.2711	12.3843	12.2798	11.5953	13.6341	12.455	11.9922	12.0825	11.8436	10.7576	12.7605	5.05697	12.5173	11.6406	12.791	14.6595	11.5435	12.3075	12.3029	12.1388	12.3284	12.2204	10.2731	11.9379	13.2706	12.8314	12.5022	13.2103	11.0476	11.9173	11.871	11.4927	10.9416
MOCS3	13.2698	12.4765	13.2376	13.5034	12.3792	13.2251	13.7171	12.7705	12.6434	12.8898	13.7196	12.9562	13.8791	12.896	12.9028	12.6404	13.515	11.1926	13.0475	12.4153	13.4684	13.6188	13.5392	13.8938	13.3193	12.7585	12.2897	13.9101	12.9809	11.5399	11.904	13.5104	11.4891	13.2193	13.4135	13.0819	13.1308	14.5251	12.4181	13.6387	12.2519	12.8752	13.5332	13.2584	13.5804	11.1384	13.2079	12.9008	13.0665
CD2BP2	13.1867	13.5718	13.876	12.7989	12.1075	12.9679	12.9355	13.1271	13.622	12.6105	13.3749	13.7464	13.9105	13.1607	13.7835	13.7092	13.6162	13.364	13.6567	12.5793	12.7733	13.1762	13.2364	13.1414	13.5055	13.804	12.8209	13.2982	12.9634	13.701	12.5451	12.8761	13.6301	13.2386	13.1081	12.6104	13.1936	13.8249	10.8873	13.5225	13.4926	14.127	13.2945	13.9571	13.6613	11.3834	13.5119	13.7759	13.5925
SVIL	13.2242	12.6256	12.4646	11.5991	13.2527	12.818	13.0889	13.2212	12.7367	13.3139	11.7771	13.5323	13.0802	11.5388	12.5739	12.7764	12.7362	12.216	13.3393	12.9393	12.8318	12.4586	12.9859	12.7045	12.8281	11.8581	12.8572	13.3186	13.0212	12.2055	13.282	12.4249	13.5046	13.0285	13.0241	12.5843	12.0518	14.5238	11.3047	13.1484	12.9598	13.1938	13.2433	13.4436	13.1151	12.4969	12.8019	12.0411	12.5398
PIGN	12.7243	13.0597	11.8983	12.5468	11.9795	13.4625	11.6207	13.2488	13.0461	12.2331	12.8247	12.9058	12.3199	12.475	13.2708	12.471	13.0785	12.9498	13.2911	12.0537	13.6797	12.3253	11.1459	13.3468	11.9124	14.3579	12.3172	12.0997	12.5281	11.9228	13.1862	12.0509	12.9927	13.2463	13.3249	12.3169	12.5212	12.9033	14.4004	12.7047	12.7866	11.7543	11.9015	12.8993	12.4322	13.332	12.3573	13.7786	12.3336
AHSA1	14.8369	14.6573	15.5043	15.5405	15.7297	15.4117	16.1694	15.5185	15.809	14.9755	15.427	15.6393	15.9147	16.3103	15.2079	15.6851	15.4693	15.3803	14.7641	16.2419	16.0739	15.9259	15.2773	15.0213	15.2114	15.5925	15.333	15.7823	15.5103	15.3066	15.3321	15.5754	15.8831	14.5643	15.6995	15.481	15.1242	15.266	15.8994	16.1071	15.2952	15.1787	15.6109	15.6043	15.695	14.8562	15.4502	15.6532	15.4072
APOM	14.2697	14.349	14.8119	14.4527	15.8034	13.5593	14.6214	14.649	14.9866	14.4391	14.4532	13.7615	12.9573	14.0024	14.6441	14.8696	13.7039	14.2405	14.6332	13.6833	12.3731	14.9059	14.3146	15.03	14.562	14.0368	14.8619	14.2062	14.2645	16.1129	14.5024	14.1605	13.2952	14.054	12.8435	13.1052	13.802	14.1954	14.4444	15.9016	13.5384	14.7002	14.8131	13.9338	13.9291	15.3897	13.8442	14.7247	12.8912
PARN	15.3288	14.722	14.604	14.5205	13.795	14.1512	14.1252	13.8204	14.022	13.4215	14.3041	14.6239	11.767	14.7683	13.7091	13.9385	14.2573	13.6498	14.062	14.803	14.6299	14.3537	14.2167	14.4593	14.3044	14.1986	13.8402	14.7744	15.3804	11.3229	14.5218	14.3958	13.2822	14.5144	13.9279	14.26	13.8984	15.8646	10.6687	14.6335	14.9793	15.0906	14.5154	12.5885	12.582	13.9438	16.8873	14.7767	15.2576
PSMG1	13.6502	12.6387	13.9406	13.3499	13.7318	13.9625	13.3182	13.8702	12.6221	13.8514	14.1893	13.7553	14.2795	12.9554	12.2902	14.1233	15.0283	14.2663	13.2728	14.1175	13.0458	14.6061	12.5715	13.1535	13.6513	13.5411	13.1426	13.7433	13.8247	13.7512	14.6984	14.0851	13.5357	13.7395	15.3382	14.599	13.4294	13.6273	14.804	12.4647	14.1777	13.1851	14.2577	13.7073	13.5926	12.7958	14.111	14.0459	13.6852
FMNL1	14.2447	14.8018	15.2731	14.2466	15.5573	14.2002	14.6666	15.8317	13.6941	14.5312	13.4516	14.9427	14.5311	14.5905	14.8658	14.7002	14.0566	13.8658	13.8871	13.9648	13.6616	13.8306	13.6883	13.6914	14.2207	13.3856	14.1519	13.6447	13.3766	16.1378	14.2841	14.0321	14.0713	13.985	13.6495	15.4582	14.0598	12.0439	11.1259	15.8221	14.9092	14.7124	14.4097	15.2257	14.3042	15.0877	14.9126	14.4817	13.7702
SGPL1	15.03	14.9628	14.9113	14.2983	13.8428	14.203	14.3898	14.2364	14.239	14.2596	13.9023	14.3016	14.2746	14.6379	14.7505	14.2813	14.291	14.6631	14.5652	14.5576	14.0968	14.2238	14.1953	14.3035	14.1895	14.5575	14.775	14.0858	14.5075	14.5301	14.071	14.983	14.687	14.4715	14.5151	14.7433	14.357	14.4326	15.2993	15.7188	14.2602	14.3401	14.7392	14.4379	14.3309	14.2561	14.3567	14.5213	14.0461
NSA2	12.1521	12.9539	13.0779	13.7464	12.4986	13.9069	13.5582	12.6238	13.0576	14.0101	13.2453	12.6782	13.9802	12.0129	13.1182	13.1761	13.376	13.0683	11.7155	13.117	13.6273	12.3928	12.0701	11.2009	12.417	12.8884	13.6582	13.0006	12.8335	12.322	13.3858	14.0884	13.7732	13.7635	13.0868	13.1427	13.7087	13.8049	16.7324	13.986	14.211	13.0641	12.7371	13.0013	13.1136	12.8229	11.8719	12.2381	13.728
H6PD	15.1617	13.3378	13.5363	12.1709	12.2078	13.6305	13.4303	14.0784	13.3366	14.0321	13.1466	13.4436	14.0373	13.4592	12.9937	13.7435	13.8398	13.1105	14.2993	14.4014	14.5582	13.7974	14.5658	13.8011	13.6297	13.8842	13.1345	12.9342	13.9054	13.5933	14.6909	13.836	13.4871	14.5559	14.1615	13.0616	13.7215	14.2167	10.4169	14.0033	12.7285	14.0658	13.993	13.6576	13.2209	14.4262	14.2907	12.5562	13.002
SEC24A	14.3793	14.1518	13.496	14.5469	14.6977	13.8426	13.4301	13.5632	13.7172	13.0839	14.0267	14.0236	14.3631	14.0542	14.9919	14.4173	14.6672	14.273	13.8395	14.0977	13.4402	13.9467	14.6333	13.8244	13.9144	14.4123	14.2247	12.9844	13.8253	14.9137	14.1522	14.2917	13.4691	14.3351	14.0086	14.3275	14.5814	13.7783	9.63911	14.5002	14.5217	13.9219	14.9483	13.8712	13.6048	14.1827	14.2936	14.6416	13.3734
SEC24B	13.3537	14.057	13.3383	12.9721	13.8368	13.4819	13.6462	14.2098	13.1415	13.5741	13.4338	12.7636	13.4076	14.4585	13.6426	13.8836	13.6585	13.6033	14.2777	13.4675	14.423	13.5403	13.5576	13.7388	13.3126	13.3666	13.7498	13.449	13.246	13.3809	14.3998	13.6727	13.4262	13.1724	13.0692	14.2801	14.1895	14.2049	14.1683	12.988	14.1055	13.0052	13.4219	14.1721	14.0648	14.3458	12.6097	13.7472	13.8816
TDP2	11.5112	13.8022	12.9791	14.5229	13.2621	14.4563	12.2482	12.7684	13.131	13.4554	13.5453	12.7915	12.6886	13.3404	12.8127	12.3879	13.3875	13.0858	13.2603	13.4417	13.4027	13.1567	14.1563	14.0454	13.4956	13.2936	14.4291	13.7309	13.3665	12.8121	12.8706	13.1202	13.5249	13.1091	13.6492	14.006	14.0226	11.8326	13.5788	13.4902	12.4303	12.7377	13.0488	13.3194	12.6613	14.3207	12.4197	13.9127	13.4179
MPC2	11.5631	13.2847	12.8171	12.9545	14.2978	13.221	13.0641	11.2645	13.4132	13.008	13.1665	12.7997	13.8802	13.1358	14.2556	13.8236	13.6888	13.7634	13.0591	13.6716	13.9812	13.3898	13.7192	13.6167	13.384	12.8204	13.1062	13.6448	13.8925	11.2397	13.019	13.3317	12.1738	12.669	13.5385	12.7001	14.1118	14.582	8.21068	12.816	10.0472	12.623	12.7003	13.6165	12.4765	12.7474	14.0683	13.42	13.3787
ETHE1	15.9503	17.3566	16.5959	17.3345	16.5166	17.6798	16.4477	16.3487	17.5029	16.3927	17.1955	16.2644	16.7273	16.9405	16.2794	15.7706	15.7047	16.9002	17.665	17.2744	16.9627	17.1138	17.7258	17.6589	17.1541	17.0527	16.7972	16.3215	16.3785	16.5836	16.656	17.3811	16.829	16.8198	16.9117	15.4465	17.9537	17.119	16.2222	15.4424	15.8342	16.6057	16.0501	16.5127	16.0773	16.8696	15.6035	16.5974	16.8239
ACSL3	14.9268	16.3954	14.5485	15.1384	15.7629	15.22	15.5146	15.2218	14.2515	15.618	14.7903	15.1958	15.9773	15.1786	15.3772	15.1742	15.5741	14.7286	15.1274	15.1945	14.862	15.0781	14.8184	13.9021	14.6774	15.0132	15.9176	14.9454	15.0279	14.6709	14.8949	15.338	14.5613	15.048	14.9184	14.627	15.6655	14.9738	16.1464	15.0638	15.6873	15.3253	15.0599	15.5488	15.4084	14.8871	14.5463	15.9209	14.928
POLR1A	12.2806	13.7564	13.0526	12.848	13.1012	12.8388	12.2879	11.836	12.5601	12.606	14.0483	13.2747	14.34	12.8701	13.4296	13.5124	13.3344	13.3589	12.6375	12.7198	13.0124	12.6422	12.7277	12.5039	13.0372	12.0214	13.327	12.5416	12.443	11.1686	13.2069	12.4957	12.4377	13.0157	13.7632	13.5475	13.3298	13.2113	11.8436	12.0954	13.8476	12.731	11.9975	11.639	13.3633	12.6218	12.8653	13.8311	13.635
STAMBP	13.5593	14.1404	13.2643	13.5407	13.3078	13.27	13.1935	12.6466	12.6812	13.2474	13.8996	12.6608	12.6185	13.1869	12.9065	12.4331	13.035	14.1132	13.0249	13.0186	12.8771	13.3644	13.4027	13.4618	13.128	13.3059	12.2921	12.6325	11.7133	11.7239	12.2656	12.6439	12.2137	13.4588	13.5207	13.4177	13.8056	11.8795	8.7719	11.3032	12.2814	13.3529	12.7717	12.3633	12.9531	13.1101	13.7077	14.2151	13.6278
CPSF4	14.0409	12.7576	13.7157	13.9361	14.1334	13.1475	12.6349	12.9312	14.0027	13.0593	13.4079	14.0083	10.5539	13.5759	13.219	14.6034	13.4243	13.1173	11.1782	13.9093	12.7768	13.1488	12.2887	12.1409	12.8466	12.5871	14.4251	13.0732	13.3576	11.431	13.3097	14.1178	13.7129	13.5117	13.3411	12.4525	13.782	13.9909	10.4082	13.7757	9.15884	14.2264	13.2385	14.3233	11.8752	11.3109	13.8431	13.2522	13.9626
ASMTL	13.3836	13.7633	12.578	12.8587	12.1497	13.5463	13.4308	13.5604	12.0317	14.1291	12.0574	13.2046	14.053	13.2281	11.7174	12.7744	11.7745	12.6128	12.4162	13.0292	12.9435	12.859	12.6457	11.8051	12.8368	13.4889	12.1193	12.0313	13.8008	12.1339	13.0817	11.4231	13.1517	13.5143	13.6458	12.8747	13.242	13.3896	13.4223	9.98315	13.1955	13.4323	12.995	13.8717	12.6463	12.8261	13.6569	13.0985	11.9951
BRD1	12.3875	12.0204	11.0949	11.5306	12.6082	12.6629	10.8461	11.0558	11.8993	11.6088	12.573	12.1469	11.1053	12.3054	11.8549	11.8714	11.5993	13.1917	11.3961	12.1395	12.2598	13.0728	11.9945	12.4241	13.6018	12.8114	11.6161	12.2446	12.798	11.6239	11.4388	11.2653	12.5084	12.7592	11.9674	13.177	11.3583	12.8517	11.4646	11.1917	10.7264	11.9686	10.7365	11.4179	11.5471	11.5517	12.1558	12.0567	12.8855
HERC2	12.6862	13.7495	13.0062	13.6571	13.3932	11.9807	13.057	12.2391	13.404	14.0962	13.0391	12.455	12.9638	14.2142	13.3054	12.4917	11.7081	13.8884	11.8619	13.0748	12.1495	13.5989	15.2407	12.2473	11.4324	13.7196	12.3025	14.195	12.288	13.5553	11.4233	13.3128	10.8459	12.8885	14.5539	12.7796	11.6295	10.3545	11.2486	15.038	13.2178	13.1546	14.1801	12.9983	13.406	13.2889	12.9559	12.0749	13.3143
RAB3D	15.8814	16.1362	15.7704	15.8811	16.415	16.3198	15.984	16.3088	16.394	16.2394	15.7783	16.2571	16.1445	16.0521	16.2854	15.7981	15.0884	16.0397	15.5161	15.5198	16.5664	15.9871	16.3884	16.4035	15.8235	15.7832	16.1688	15.9975	15.804	16.5824	15.7989	16.0398	15.1192	15.1455	16.0773	16.0636	16.0086	16.0361	16.7723	17.0789	16.3023	16.0422	16.4997	15.9077	15.7787	16.2707	15.78	16.0935	15.8006
ESRRB	13.2532	12.6956	12.506	12.8106	14.5291	13.7283	14.4663	14.4819	13.9389	14.0095	13.0112	13.2391	13.6991	13.1038	13.8574	13.9809	14.0178	14.0721	15.0839	12.8787	14.0721	14.4124	14.0368	14.0939	14.5641	14.2359	12.7968	15.0677	13.6624	14.1052	14.7193	13.305	14.83	15.038	14.6541	13.5907	13.2253	16.2218	12.2461	12.685	12.2747	12.7051	13.2735	13.0479	14.7053	15.425	15.5997	12.615	13.3018
SNAP29	13.6147	12.7991	13.6365	13.3488	12.5763	12.9094	13.3872	13.6678	13.4781	13.3902	13.1626	13.8008	14.4074	13.5535	13.5145	13.4142	12.3234	13.2167	13.5727	13.8355	13.1852	13.527	13.7454	13.4831	13.3984	13.6596	13.459	13.3548	13.4463	13.841	13.2481	13.2702	13.4479	13.6351	13.7516	13.4765	12.3259	13.4209	10.904	13.6688	12.5112	12.6092	13.6186	12.6639	12.7744	13.5907	14.0339	13.4537	13.3843
OXSR1	14.1233	14.1432	14.1772	14.0687	15.2369	14.6872	13.9964	14.8386	14.8249	14.645	14.3162	14.2365	14.0986	14.9669	14.303	14.6254	15.1971	14.5753	14.0212	14.439	15.1018	14.1887	14.161	14.3143	14.7036	14.3902	14.5985	14.3676	14.7305	15.1761	14.725	14.3335	14.8313	14.3352	14.6387	14.6527	14.197	14.6742	15.5637	14.8764	14.5929	14.7058	14.2382	14.6824	14.7608	15.2414	14.51	14.5041	14.4867
HSPA4L	16.6154	16.6221	16.7644	16.5993	16.6562	15.9186	16.4075	16.1759	15.2743	16.463	16.5873	16.2665	16.2684	16.4918	16.1872	16.0644	16.2753	16.2012	15.8606	16.771	16.042	16.4664	15.7219	15.6236	16.1748	16.5485	16.1461	16.1354	16.0904	15.5982	15.9414	15.7253	15.7129	16.7007	16.8903	16.7793	16.8988	16.1227	15.8453	15.4054	15.2048	16.4345	15.5076	15.953	16.3313	15.6944	16.3012	16.7043	16.2729
PTBP3	14.7626	14.3045	14.6012	14.3127	14.2971	13.758	13.775	13.8088	14.1172	13.5859	13.9793	14.1428	14.2114	14.2557	14.134	14.4092	13.6916	14.245	13.8702	14.5892	13.8783	14.2794	13.9711	13.9468	14.0669	13.9984	14.4763	13.5741	14.3437	13.5561	13.7758	13.9288	14.2755	14.5449	13.9745	13.4456	14.078	13.681	15.0627	14.4378	14.2832	14.5081	13.9602	14.6332	14.2413	14.4792	14.5028	14.4464	14.5762
LSM8	14.1555	14.3308	14.5934	14.923	14.7962	14.8116	14.5742	14.412	15.4037	14.9081	15.0349	14.6616	15.3826	14.4919	14.9323	13.7015	15.5032	15.2375	14.9272	15.0261	15.4357	15.1199	14.828	14.9247	14.9527	14.8733	14.9782	15.2971	14.5781	14.7664	15.0687	13.3835	14.3428	14.3534	14.1973	14.8949	14.6578	14.0132	13.9736	13.8727	15.297	14.0351	14.0739	15.287	15.4746	14.7939	14.4586	14.0359	14.7438
AP2A1	17.2522	17.0604	16.7871	16.8989	16.9245	17.3956	17.1679	16.699	16.768	16.6693	17.067	16.4048	16.9507	17.121	17.2072	17.0678	17.1808	16.9231	17.3451	16.6558	17.3089	16.8508	17.0321	17.1594	17.1948	17.2234	16.9688	17.3743	17.0556	16.8852	17.3724	17.2497	17.4026	17.4047	17.3243	17.1757	16.77	17.0924	17.801	16.5393	17.2712	16.9072	16.7038	16.9181	17.5784	17.3123	17.1063	16.912	17.0089
DDX58	13.3221	13.7767	11.8723	12.901	13.0915	12.433	14.142	12.9376	13.4487	13.8814	13.7617	12.4586	13.0211	13.5347	13.2932	12.4511	13.7782	13.1716	13.5231	13.3375	12.8084	12.7455	13.8318	12.7784	13.0258	12.5674	12.9252	13.6011	11.9647	13.9297	12.978	13.0489	14.1444	12.4966	13.6211	12.8102	13.8303	12.148	12.3135	14.6641	11.3703	12.9914	12.3248	12.9057	12.6506	13.2293	13.6041	13.1771	12.7087
STAU1	13.2082	13.3412	13.9164	13.8464	12.9862	12.8463	13.1606	12.6735	12.3355	13.3178	15.2253	13.0549	13.9668	14.1317	13.982	12.8906	14.301	11.4592	13.6588	13.7868	12.7261	13.5698	13.1924	12.8562	13.775	13.5262	13.7698	13.252	13.5997	12.8393	12.3295	13.4568	13.6391	14.005	13.0146	13.0407	13.8454	13.5683	15.0972	13.4787	13.5569	13.249	12.8226	13.6446	14.3371	12.517	13.1522	14.1492	13.9244
TMEM50A	14.2929	12.9725	12.2624	12.5991	12.8259	13.5663	13.6018	13.5189	12.7071	13.7514	12.9688	13.2547	13.293	13.3019	12.6745	12.4378	12.0357	13.3628	12.1182	12.0777	12.7865	12.3397	13.2628	11.4155	12.6867	12.1864	12.5544	10.9507	12.673	12.2837	12.6355	13.067	12.2281	13.4949	13.0524	12.2776	13.1028	12.6861	11.8875	11.7253	13.4469	12.0644	12.7339	13.7291	12.4819	14.398	13.766	13.1145	12.8176
CAVIN2	9.92231	14.3379	14.4253	12.4813	10.8443	14.2556	14.6562	14.8408	14.0095	14.3165	13.6648	14.3492	15.4073	13.4602	14.9614	13.6053	13.6875	13.375	13.1182	14.3209	14.3802	12.4586	14.4392	14.5926	14.8034	14.3223	13.9485	14.613	12.9401	14.4537	15.0137	13.0922	15.3243	14.6438	14.1	14.2875	13.3387	17.2222	11.0002	13.6029	13.8328	14.4839	14.0269	13.5775	14.8452	15.2794	13.7795	12.5707	13.1339
BAG2	10.8659	13.2342	13.1872	14.5658	14.4564	13.819	14.9194	15.2715	13.4833	13.6149	10.8603	15.2496	9.81596	14.7931	9.15717	16.1087	14.1889	12.4716	13.8228	15.1219	14.0359	14.3917	11.7972	13.9904	13.89	13.1479	13.0097	14.0831	13.2848	15.1081	14.9078	13.8395	15.1054	14.3196	14.2776	15.4644	10.2393	15.3429	11.8683	14.2214	13.5743	14.7039	14.6226	11.5753	12.2287	13.9436	13.9043	11.1427	13.7031
BAG3	13.7731	13.1424	10.5891	13.3848	14.3588	13.1277	13.5951	14.5293	13.7423	13.0924	11.2556	13.7233	11.7746	13.2153	12.4804	13.7248	13.6584	13.8602	14.241	13.5161	13.0056	12.9856	14.1874	13.2928	13.1197	13.3583	12.0277	13.8653	12.6368	14.6176	13.4871	12.9068	12.1016	12.1982	12.7222	12.9909	12.6956	14.9027	12.2257	13.3846	11.1199	13.5466	13.3934	13.3888	12.5108	12.5653	13.7942	12.9025	12.1999
MAP4K4	13.4745	12.3645	13.428	13.3013	13.304	13.2383	13.1702	12.5307	12.3459	13.4932	11.4156	12.8704	12.1859	11.8995	12.5105	12.4735	13.1907	12.5237	11.8322	12.4285	12.6372	13.24	12.5916	13.0139	13.8302	13.5776	12.6291	12.576	13.0373	13.6199	11.5497	12.6428	12.4657	12.0213	12.6475	12.4005	11.3799	12.4059	11.7227	12.941	11.9446	12.7926	12.8997	12.5356	12.9521	12.372	12.0812	12.5996	13.0486
MLYCD	13.0831	13.2918	12.393	12.6851	13.3596	13.4095	13.8062	14.3099	12.8386	13.1035	12.2426	13.3448	11.9718	13.1933	13.2444	13.3462	13.0354	12.8702	13.9511	13.123	13.7753	12.8507	13.5604	13.5999	13.1393	13.869	12.7437	13.4901	14.2608	14.0899	13.1564	13.4385	13.6173	13.5504	13.605	13.2313	12.6223	14.9554	9.17257	13.0059	11.9769	13.1834	12.3364	12.413	13.561	13.5704	13.7397	12.9364	13.3233
AIFM1	16.5797	16.3501	17.1838	16.2129	15.6041	15.7561	15.383	15.4908	15.6506	16.4055	16.3128	16.4012	16.0631	16.1368	15.5899	16.4082	16.2339	16.5319	16.6964	16.4657	15.8559	16.379	15.8557	16.1376	16.3026	15.9314	15.252	16.6088	15.8707	15.6245	16.8401	16.313	16.5339	16.265	16.9852	15.56	17.0727	17.7389	15.4486	15.693	15.9515	16.4883	16.7162	16.3301	16.4093	15.1619	16.4915	16.299	16.2352
EML2	14.1281	14.1207	14.0213	14.0752	14.5956	15.5594	15.1852	14.3752	15.2919	15.2291	13.443	14.341	15.3573	14.5914	13.5956	14.5506	14.6672	14.3964	14.6545	14.4709	16.0407	14.8832	16.1036	15.6138	14.5187	14.8137	14.2798	13.8093	14.429	14.4662	14.3119	13.4761	15.2834	15.1587	14.8165	14.8095	15.1508	15.2913	11.6241	14.5882	13.1102	14.3267	14.2462	15.2521	14.3849	15.4313	14.2965	14.0091	13.636
BPNT1	15.0783	14.4587	14.0836	14.9916	13.8478	14.8501	14.179	13.4889	14.2808	15.0995	14.2452	14.0359	13.5957	15.0532	15.4078	13.1499	14.8646	15.5302	15.2301	14.2377	15.0356	14.2668	14.6909	15.1843	14.2837	14.0012	15.8753	13.745	14.0405	13.6649	13.3034	14.7332	13.2767	15.2138	14.7699	13.9517	15.5209	14.1013	14.6968	13.4533	14.3304	13.6082	13.9744	13.5202	13.2975	13.9513	14.2466	15.2059	13.4147
DDAH2	14.0375	13.627	13.8235	13.8702	13.0036	13.5891	13.7706	13.3111	14.936	13.7246	12.6649	13.5201	14.6224	14.3307	13.7152	13.2604	14.5465	14.8588	14.3541	12.9464	13.2796	13.7963	14.3787	14.7018	14.2744	13.5423	13.7369	14.3958	13.5078	13.8	13.3488	13.7173	13.2312	13.9191	13.6266	13.2922	13.505	14.0022	10.3151	14.3854	12.8555	14.0952	13.8486	13.9749	13.8596	13.5372	14.1787	13.7366	14.137
ABHD16A	14.2306	14.1955	13.4611	13.3833	13.9609	14.1755	13.2412	12.5126	14.3307	13.7989	13.6661	12.9032	13.0322	14.0735	13.4976	13.2647	14.0987	14.5914	13.7541	13.1982	14.4636	14.2704	14.0975	13.7328	13.8598	13.2789	14.4679	13.7208	13.5653	13.0103	13.3263	13.9155	13.9474	13.6465	13.9322	12.8707	14.2849	13.6668	14.6787	13.8359	12.8736	13.1197	13.4964	13.1292	13.567	14.4117	13.5933	13.9441	13.3962
TXNDC12	15.7941	14.6881	14.4336	15.0322	15.214	14.8863	14.899	14.2624	15.2974	15.2941	14.9703	14.0707	14.7742	14.8508	14.7	14.4221	14.7533	14.46	15.1404	15.2587	15.4016	15.0807	15.3992	14.8773	14.7643	14.9464	14.663	14.1718	14.7016	14.717	14.7767	14.7331	14.5214	15.4805	14.6865	14.6134	15.1905	14.4692	15.35	14.0147	14.895	15.175	14.7538	14.6451	14.4509	14.9206	14.7494	14.6656	14.7649
FTCD	12.1255	12.3131	13.2688	12.6376	11.4031	12.5966	13.7577	14.7074	13.3646	12.2544	12.6445	13.2038	11.2704	12.3441	13.2267	14.4753	12.0302	10.6759	12.8149	14.559	12.9162	13.3824	12.7545	13.4087	14.0905	12.4392	12.4639	13.1701	12.5442	16.0823	14.8868	13.7132	12.6114	14.1431	12.3976	13.2074	13.8695	15.2736	12.0468	13.754	11.5507	16.4107	14.0418	10.7613	11.5296	15.8757	16.531	13.6901	14.1097
EFEMP2	13.6645	14.0198	12.7084	12.7087	12.4341	13.1685	13.5452	12.8282	12.4534	13.2264	9.35272	12.258	12.1654	12.8681	12.4028	11.8897	12.1184	12.6764	13.6942	13.0937	13.2755	12.967	13.506	12.4341	12.7484	13.3435	12.0779	13.6907	12.9028	12.2624	13.6428	13.6885	14.2149	13.5021	13.4887	13.2629	11.6229	13.7204	10.546	12.5484	12.0246	14.1406	13.0717	11.086	13.8214	13.5207	13.3331	12.8973	13.3734
AGR2	15.7615	15.8781	14.3835	17.0761	18.91	18.0871	16.3208	14.153	18.641	16.8384	15.8214	16.6575	18.4482	16.256	17.508	15.9907	16.1511	16.6516	16.1609	15.4745	18.7507	17.2935	17.3776	17.5031	16.8599	16.8913	17.4492	16.0136	16.1171	18.4927	16.9721	17.7036	16.9778	14.9729	16.0607	15.9987	17.0336	15.2103	14.8318	15.2288	16.7143	15.7969	17.8306	17.342	17.2149	16.3762	14.1306	16.54	14.7753
BCL10	12.6518	13.6219	12.1574	12.4013	12.191	13.8199	12.9893	12.5443	12.4813	13.4337	12.3448	12.9051	12.1979	11.7019	12.6991	12.6525	12.5406	12.4023	12.475	13.1475	12.7393	13.4968	12.8982	12.8974	12.8452	12.8435	13.3223	13.1298	13.8031	11.8115	12.8835	12.5022	12.8525	13.0327	12.4418	13.026	13.2684	13.2855	11.7536	12.944	10.893	12.1741	11.8772	12.9044	11.5858	14.0543	12.1744	12.5387	13.1412
NDUFB10	14.7632	14.8134	14.8456	14.1275	13.5976	13.8325	13.4826	14.1216	13.7101	13.6916	14.791	14.1171	13.5506	14.7214	14.2366	14.5454	13.9629	14.5161	13.0688	13.9958	13.9229	13.8927	14.1447	14.9604	14.3269	14.4449	13.8604	14.6337	13.5327	14.0351	14.0092	14.4659	13.8284	14.671	14.5184	14.0982	14.0897	14.7942	10.9788	14.4048	13.3819	13.6905	14.1152	13.3971	13.7227	13.9401	14.2191	14.2057	13.6918
CLPTM1	13.2073	13.8119	14.0715	12.7609	13.2402	13.2516	13.9644	13.5241	13.3765	13.0705	13.4965	14.0177	12.2494	12.6736	13.776	14.1337	13.747	12.9433	12.9989	13.8035	12.4946	13.8505	13.1721	13.2113	13.4253	12.8977	14.1285	12.8128	13.499	13.7753	13.2821	13.7435	13.3077	13.6351	13.8133	13.6351	13.7444	14.0911	15.5283	12.9777	14.4181	11.5654	13.4277	12.8859	14.0658	13.5088	13.0684	12.9547	13.6121
MOCS2	14.3811	11.7464	12.3646	13.1379	14.1576	12.4871	14.28	12.081	14.0411	13.1132	13.3056	14.3952	13.0863	12.1868	13.9066	13.6845	13.1561	12.9369	14.0632	13.4293	14.4473	12.8389	13.9663	13.7804	12.9666	13.2687	13.1064	12.9846	13.6327	11.5164	12.8131	10.9668	14.0526	14.0222	13.9098	13.5173	13.2233	13.7984	11.1147	11.2847	12.4915	11.5935	11.1344	11.0853	12.9629	13.1057	13.1335	13.5446	12.1236
TOMM40	14.5951	15.1792	15.3637	15.0962	15.3662	14.8846	14.8056	14.9106	14.6763	14.8056	15.3411	15.0927	14.6019	15.3233	14.8775	14.9711	15.6597	14.7651	15.1008	15.6043	14.9499	15.0196	14.7274	15.0648	15.1426	14.7877	15.3734	14.7651	14.9747	14.6017	15.2315	15.6992	14.7116	15.1431	15.4854	15.2653	15.7066	15.7996	15.4363	15.1188	15.6205	15.318	14.6221	15.0326	15.2543	14.8675	15.3196	14.8816	15.3169
PEX11B	14.4579	14.6355	13.2738	13.4448	13.6537	14.3529	13.7807	13.9596	13.9154	13.9881	14.4092	13.431	13.4349	13.8563	14.9032	14.1271	14.1224	14.0746	14.1958	12.2904	14.1872	14.014	13.7953	13.7073	14.4835	14.4069	14.2432	13.3788	13.1354	13.7733	14.5527	13.2986	13.9956	13.1373	13.2779	12.7089	13.801	13.3157	16.9739	13.4185	13.0268	13.9939	13.1141	13.4777	13.8481	14.4527	13.7652	13.4098	14.0125
PAK4	14.508	15.3461	15.5411	16.198	16.0674	15.8467	15.7465	16.2469	15.4985	15.4947	15.5586	15.4654	14.4251	16.0194	16.053	15.08	14.7814	16.1977	15.8511	15.8714	15.3362	15.5032	15.3938	15.7195	15.7056	15.7881	15.5483	13.5784	15.0069	16.2167	16.1776	15.8141	15.7595	15.527	15.289	15.8038	14.6483	16.6361	9.95241	16.513	14.0006	15.2451	15.0244	14.1072	14.4153	16.4798	15.1909	15.4408	15.7495
ACTL6A	13.2694	13.7149	14.4624	13.9562	14.1876	13.7038	13.6895	14.0734	14.139	13.8983	14.3427	13.9663	14.8696	14.2327	14.305	14.3062	14.5765	13.6791	13.6043	14.131	13.9588	14.2453	13.3384	13.6542	14.1254	14.2552	13.8746	13.9214	13.5374	13.8406	13.7257	14.0253	14.0272	13.9462	13.7866	14.4606	13.8085	13.9681	12.493	13.3546	15.0924	13.4852	13.7028	14.556	15.1813	14.0534	14.1295	13.9174	14.5799
CYB5A	12.9318	12.9073	13.5157	11.4979	11.8014	12.9839	13.3247	13.0587	12.9896	13.1959	12.3023	14.3824	12.4988	11.0333	11.1103	13.626	12.6747	12.0041	12.8267	12.9878	13.6552	13.5008	11.8669	13.2099	12.6484	13.3854	13.0407	12.4453	14.0358	11.4193	12.3757	12.0172	13.534	12.0094	11.8774	11.6275	13.2309	12.944	12.7366	11.3095	11.9091	13.4509	13.4147	11.6359	10.8827	12.1586	13.6272	13.9959	11.6625
ADH1B	10.6511	14.6653	12.8208	12.6046	11.0627	14.8456	12.6863	14.3001	12.1215	13.1752	11.664	11.9664	9.67553	12.2654	12.5518	13.6581	12.8484	13.0922	11.2581	12.2634	14.5679	14.7597	14.1858	15.8263	16.1009	12.4084	13.1402	13.827	12.4277	13.608	14.269	13.2882	12.5364	10.7228	12.7507	13.1774	12.371	16.1562	12.5337	11.4795	10.012	11.9934	12.7588	13.7251	12.4577	13.9208	12.4946	13.6557	10.55
ADH1C	12.4159	15.425	13.8533	14.0662	13.6148	15.0491	13.419	14.7439	13.3739	15.4573	13.0394	13.9229	14.5049	13.2444	13.2859	14.9029	14.5228	14.818	12.9285	13.9378	14.3903	14.8966	13.4496	16.6772	17.0106	13.8458	14.785	13.8061	14.6573	11.3031	14.9462	15.2717	12.7823	14.15	13.4808	13.7245	15.7015	16.8235	10.1256	13.0532	12.8052	12.3415	12.7236	15.0219	13.9764	15.2141	14.4563	14.3332	11.8954
LDHA	19.0634	19.6076	19.135	19.403	19.0811	19.2551	18.7041	18.9243	18.0929	18.9152	18.9264	18.0753	17.5995	19.5592	19.3709	19.465	17.3943	19.6091	18.7531	18.9193	18.8238	19.2934	19.2671	19.4758	18.8644	19.1855	19.8853	19.1945	18.3298	19.0387	18.6094	18.5761	18.4373	19.1818	19.4454	19.5619	18.3493	18.6707	18.5146	19.4683	18.6318	18.1798	19.0681	18.1392	18.537	18.4938	19.2957	19.5056	18.923
ALDH1A1	17.0838	14.2949	15.4572	15.1408	14.271	17.1017	15.2905	15.586	14.4293	15.408	14.4599	15.5902	16.7084	15.0018	15.4224	14.1911	14.7687	14.081	17.1799	15.7027	18.1621	15.2177	15.4354	16.1911	16.8939	16.7239	14.6813	16.2854	15.5458	15.9719	16.2815	15.2417	17.201	14.6115	17.4705	15.5146	14.5233	16.6198	16.5564	16.3519	16.7522	16.1093	14.9813	15.192	15.45	16.1025	15.9979	14.1544	14.124
GLUD1	16.4151	16.1291	16.5145	16.2004	15.9718	16.8124	16.1944	16.055	16.2458	16.6794	16.148	15.6751	15.2096	16.5217	15.9754	15.6329	16.2826	17.0518	17.2017	16.282	16.7508	16.3412	16.9351	16.7891	16.4214	17.0689	16.1508	16.3375	16.6067	16.102	16.2937	16.7106	16.5312	16.8863	16.6492	15.9768	16.7421	16.6264	15.9182	16.5034	16.1682	16.3266	15.7254	15.8345	15.8545	15.9452	16.7448	16.809	16.2631
CYB5R3	17.7303	17.4427	17.1877	16.3547	17.2248	17.0368	17.0622	17.1193	16.3781	17.2498	16.4486	17.4045	17.558	17.1479	16.5131	16.7404	17.3719	16.7758	17.2774	16.7318	16.6473	17.0187	16.859	17.0951	17.0156	17.1834	16.7755	16.9794	16.7141	17.417	16.997	17.1941	17.4488	18.004	17.2384	16.9287	16.9677	17.4123	17.0392	17.1525	17.3522	17.6542	17.1262	17.3993	17.2075	16.9324	17.0566	16.3626	16.9859
GSR	16.2388	16.2713	15.9836	15.955	15.6777	15.8782	15.6008	15.3324	14.9393	15.6608	15.8164	15.7779	15.5026	15.6083	15.392	14.9129	14.9771	17.0156	15.396	15.3108	15.747	14.8856	15.843	15.5587	15.2572	15.1637	15.8715	15.1259	15.7058	15.6394	15.3039	15.2341	14.6934	15.5213	15.3102	15.4831	15.3055	16.0505	14.5209	15.2448	15.7672	15.2238	15.7341	16.1168	16.0331	15.7784	14.9381	15.7431	15.5082
MT-CO2	15.1882	16.5956	15.6618	15.7787	15.5534	15.5705	15.4223	15.1496	15.3902	16.4423	15.1494	16.633	16.4755	14.8746	15.4337	16.2016	16.3999	15.9802	15.3958	14.8989	14.6723	15.1664	16.1099	16.027	15.9976	15.8807	16.3485	15.2078	15.949	15.2317	16.1614	16.6423	16.0166	15.2305	14.3894	15.4375	15.7033	17.4256	15.0463	15.1476	15.9446	16.722	15.5732	16.5658	15.8832	16.0307	16.4793	15.7813	16.4455
SOD1	17.1701	17.106	17.465	17.2667	16.952	17.0217	16.6595	17.0794	17.7702	17.521	17.5061	16.7591	17.7699	16.9682	16.7312	17.5297	17.9483	17.3188	16.9571	17.2937	17.2235	17.2984	17.5287	17.2325	16.7837	17.1372	17.1884	16.9012	16.9641	16.8243	17.4323	17.7561	17.1461	17.2631	17.4266	17.4403	17.7641	17.5416	17.501	16.2639	17.2749	16.7624	17.0034	17.5244	17.1018	17.0019	17.6333	17.1802	17.535
CP	15.2936	16.3397	15.6797	15.6572	16.7859	16.0686	16.1852	17.491	16.3825	14.937	15.0016	15.1783	16.049	14.9334	15.6053	15.0353	15.1135	14.8643	15.1682	15.4891	14.7842	16.5471	15.3494	15.5703	15.1642	15.4102	15.0351	15.2773	15.2039	18.0153	16.5013	15.3206	15.3895	14.872	15.0462	15.2405	15.7456	17.1862	14.7323	17.8636	15.7578	14.968	15.5864	15.657	15.8055	17.7305	15.967	15.1491	14.8922
OTC	15.1585	13.3618	14.6685	14.8211	14.5523	13.8212	14.084	14.6715	15.0304	13.9402	13.0678	15.3491	12.261	14.422	14.5863	14.3005	12.3127	13.6882	14.8753	13.9472	14.7123	14.5833	14.2353	14.2735	14.2628	14.407	14.4335	14.8541	12.7715	16.0955	14.7998	14.7398	15.5676	14.5215	14.4252	13.81	13.5305	15.1305	12.4113	14.8723	13.016	14.8779	15.1519	13.6124	12.5689	15.9927	14.643	14.5825	14.5863
F13A1	13.7948	14.6586	14.3484	13.1263	15.8935	14.0671	13.2458	16.8216	14.4	12.8968	12.8924	14.0035	13.3535	13.398	14.2065	13.8625	14.3095	12.9878	14.3411	14.1625	16.2942	15.4325	13.6409	14.6527	15.1058	13.8162	13.9165	14.7776	13.7596	15.7065	15.5883	13.5697	14.2588	13.7386	13.3034	14.2809	13.0218	15.0798	9.05023	15.644	14.2265	14.2577	13.7041	13.5959	13.5807	16.6949	14.6142	13.4169	12.9716
PNP	15.9039	15.1129	16.6219	15.8592	16.3542	16.1622	16.2422	15.8255	16.3786	15.6966	15.9428	15.9586	16.3858	16.2786	16.3029	16.5728	15.5478	16.1354	15.5109	16.4108	15.9571	16.0711	15.6919	15.9664	15.8242	15.8479	16.3052	15.82	15.6253	16.3598	16.121	16.1274	15.5419	14.7982	16.063	15.856	16.1589	14.8718	14.4632	15.8469	16.8237	15.848	15.5853	15.9157	15.9624	16.3077	15.5803	15.9205	15.5143
HPRT1	15.1531	14.1414	15.1781	14.7308	14.2642	14.1056	14.7684	14.7242	14.7726	14.1375	14.8824	14.5272	14.7916	14.7642	14.4432	15.6276	15.0732	14.6387	14.3122	14.8035	14.7968	15.1892	14.4797	14.0571	14.5603	14.286	14.6807	14.7041	14.059	14.5849	15.596	15.0905	15.6301	13.9931	15.2494	14.3022	14.2345	14.5953	15.137	14.3954	15.0712	15.8179	15.2259	14.3091	14.88	14.3117	14.7453	15.0858	14.9234
GOT2	17.0577	16.5187	16.7	16.8862	16.0573	16.084	16.2564	15.6825	16.2933	16.6218	16.9175	16.6188	16.8651	16.6486	16.0137	17.3612	17.7651	16.7487	17.1059	16.363	16.7621	16.4027	16.898	16.7256	16.7334	17.3714	16.1947	16.8483	16.8076	15.999	16.2774	16.3322	16.3608	16.5802	16.9722	16.4769	17.5937	17.9385	16.1646	15.3918	16.7177	17.6359	16.441	17.1319	17.0353	15.8586	17.1013	16.8229	16.4523
EGFR	13.3391	13.9552	12.5399	14.1429	12.6561	12.8089	12.8194	12.4667	13.6899	12.3988	12.7904	12.6518	12.178	13.9081	13.1819	14.6836	12.958	13.4115	13.2616	12.1911	13.136	14.4651	13.4466	13.0139	13.309	13.5432	13.457	14.1553	12.6475	13.9624	11.3346	12.391	13.448	13.7545	13.3545	13.829	13.126	13.9239	10.7006	14.0813	13.7193	11.5804	14.4527	14.546	14.2485	12.3731	13.274	14.2888	12.2201
PGK1	18.1389	17.7422	18.0058	17.7008	17.3356	17.5602	17.3525	17.311	17.4926	17.3379	17.6368	17.62	17.0255	17.5073	16.815	17.2766	17.4044	17.6404	17.8015	18.2059	16.6491	17.2805	17.0889	16.8424	17.2502	16.604	17.8046	17.1804	16.655	16.9214	18.0098	16.983	16.747	16.8051	17.6812	16.9985	17.4291	17.5151	16.3385	17.4681	17.3611	17.3593	17.6402	16.9462	17.2014	17.5966	17.7449	17.7397	17.5562
AK1	16.2329	14.5333	15.8942	16.0859	16.1279	14.5023	16.4214	16.1744	15.9459	16.0739	15.3959	15.4795	14.7619	16.9264	16.7258	15.5782	15.3386	16.5356	16.7425	14.7444	16.1619	15.5334	16.2585	16.3653	14.9706	14.6021	16.1857	15.4623	14.7063	15.7911	17.1803	16.0316	15.4746	16.3102	15.5877	16.171	17.1659	17.7469	15.9534	15.5528	14.9865	15.1787	16.7556	15.5591	15.0399	15.8309	15.9149	15.5328	16.5862
F2	13.5821	14.4563	14.4541	14.0413	16.4897	14.2193	14.8852	15.497	14.9928	14.1137	13.912	14.6964	13.5162	13.6645	14.2255	13.9746	13.6213	13.7099	13.8203	14.5569	12.584	14.523	14.0694	13.8788	13.9304	14.1645	14.43	13.7702	14.2421	15.9083	13.9923	14.2802	14.3896	14.2089	13.4681	13.7994	14.0412	14.3836	13.2373	16.3586	14.5475	14.3607	13.9722	14.0415	14.3933	16.6428	14.324	13.8034	13.912
C1R	12.6546	13.469	12.7442	12.2721	13.5004	12.1652	13.302	13.6879	13.7123	12.3438	11.1094	12.9593	12.6392	12.1609	12.2684	12.5066	13.2552	12.3746	12.8359	13.212	12.1398	12.5766	11.9017	12.2437	12.128	12.1603	11.9922	12.3629	12.6073	13.6424	14.15	12.7154	12.9395	12.8674	12.1865	13.1528	11.979	13.1483	9.57146	13.8135	13.9445	13.3708	15.4836	12.1596	13.1986	13.7998	12.9573	12.2647	12.4713
HP	17.0683	18.7274	16.8072	17.3803	18.233	18.2004	17.9759	17.8844	18.9627	16.1065	16.5598	17.2741	18.0121	16.5423	17.1207	17.1047	17.6376	16.269	16.6383	18.0248	15.9259	18.3574	16.9274	16.613	16.2494	17.3179	16.4574	16.0339	17.328	18.6776	16.5207	16.1446	17.2311	16.4389	16.3551	15.6891	17.6411	18.8373	16.6731	17.0938	17.6659	16.888	16.479	17.7058	17.0746	19.3494	17.1478	17.2798	16.9845
HPR	9.89125	12.962	11.8551	11.9805	13.5893	11.5205	12.6661	13.0888	12.7506	10.606	11.7815	12.2903	11.0644	11.4321	11.7546	11.8936	11.8238	11.2112	11.7049	12.8543	9.95256	12.1119	11.7018	12.2484	10.3935	11.7515	11.6951	10.3688	11.3398	14.8415	12.3046	12.6044	12.2809	11.7512	11.0446	11.8917	12.2365	13.4876	12.017	13.4722	10.4427	8.08695	12.5258	5.61719	11.656	14.765	11.9103	12.0166	11.58
F9	14.5071	13.7473	14.5755	12.959	16.845	14.3492	14.591	15.2924	14.0602	14.2184	12.3272	14.6033	13.2181	12.1237	13.9135	12.879	11.9394	13.7817	14.0868	13.9618	13.8825	13.8467	14.2848	13.8061	14.0951	13.0599	13.8606	13.8662	13.9165	15.6737	13.9047	14.3922	14.3689	14.694	14.4868	13.517	12.792	15.2146	9.36185	16.6592	13.0842	13.999	13.2881	13.9899	12.5971	15.6968	13.9389	12.658	13.0735
PLG	14.4102	15.0029	15.3884	14.8016	17.1809	14.0884	15.0915	15.4644	15.5189	14.1987	14.4183	14.6161	13.8966	14.1937	14.9389	14.515	14.5381	14.4883	14.1916	14.4643	12.9753	15.5057	14.7171	14.1011	14.3242	14.6932	14.5375	14.1477	14.1648	16.6661	13.7582	14.3404	15.1375	15.01	14.1041	14.0732	13.9951	14.9835	14.0732	18.5271	14.9585	14.526	14.3783	14.3829	14.4097	16.1063	14.6586	14.3662	14.3706
CFB	15.6941	16.3366	16.0521	15.9589	16.3534	15.7638	16.6826	16.6249	16.3929	15.0086	14.7569	15.6508	15.1707	15.5578	16.0762	15.7305	15.5859	15.7222	16.029	16.0141	15.0093	16.6502	16.186	15.4939	15.4307	15.6394	14.8051	15.5954	15.2454	17.8356	15.9513	15.7176	15.7027	15.5166	15.6879	15.5681	15.5847	16.0822	15.5198	17.4297	15.6124	15.3334	16.1609	15.4804	15.4636	17.204	16.4536	15.9123	15.7548
CA1	14.6901	14.7078	18.1434	16.986	17.5228	16.7178	16.7931	15.8661	17.4567	17.111	16.9822	17.0849	17.198	15.9937	17.7809	17.3798	16.4096	16.9876	16.3824	15.9821	13.9175	17.8521	16.5723	16.9772	16.2704	16.4945	17.6923	15.7637	16.3186	17.4868	15.8396	16.2721	16.2503	15.518	14.7925	15.9944	16.7415	14.8611	16.6324	15.8804	17.4448	17.229	16.6033	17.6415	16.8805	18.1916	17.2155	16.7869	16.9647
CA2	13.6467	13.3466	14.9456	15.5809	15.5614	14.003	15.1265	15.1085	15.5341	14.6795	14.6883	14.9112	14.5391	14.2328	14.6025	15.5505	13.444	14.1097	14.268	13.7952	13.7579	14.7632	15.7108	14.6913	14.9101	14.1753	15.9456	14.3237	14.8413	14.8602	14.7752	15.5486	14.7673	13.7055	13.9833	13.8114	14.8992	14.2924	13.9846	14.5775	15.275	14.7684	15.6112	15.329	14.4328	15.936	14.8295	14.6476	15.4938
ASS1	14.5217	16.1485	16.9225	17.1902	14.1984	17.134	17.4725	15.48	15.8245	16.0709	17.01	17.2739	17.437	15.1658	18.2227	17.2153	17.0431	17.5664	15.4145	16.0199	16.1419	17.1206	16.851	16.25	16.6741	15.6993	16.9874	15.2631	15.6691	15.2856	15.9479	17.9952	15.6698	14.2134	16.8161	16.4511	15.9707	16.0339	15.546	15.4292	16.2897	15.1741	16.7458	16.9549	17.7992	17.0593	16.0199	15.004	14.8953
OAS1	12.4926	14.1282	13.5551	14.687	12.1961	14.7047	14.3195	12.2972	13.7801	12.754	13.1847	12.9891	14.2272	13.4948	13.784	12.8775	15.0754	13.8255	14.1188	13.4039	14.0821	10.786	11.1457	10.956	14.1104	14.1549	12.192	9.37789	12.0196	11.7362	11.9825	11.2054	11.303	11.1238	13.2429	12.4823	12.6362	11.2323	8.18418	14.2068	17.288	13.93	11.4379	11.6987	13.5135	14.6424	14.3049	10.9643	13.0786
SERPINC1	16.5628	16.1	15.9178	15.9052	18.3767	16.0219	16.1813	16.7251	17.5006	15.7726	15.6891	15.8923	14.6465	15.4611	16.5489	15.4737	15.5531	15.8643	15.8798	15.5645	15.8627	16.43	16.3643	16.8745	16.0178	15.878	16.1421	15.6949	16.2355	17.7429	16.3661	16.2275	16.0756	16.0209	15.8067	15.9255	16.2438	16.9033	15.6142	18.6083	15.097	15.2742	15.9006	15.2411	14.8896	17.7009	16.0067	16.1117	15.456
SERPINA1	14.7969	16.7276	16.6354	16.2686	17.6763	16.9512	16.8936	16.9296	18.1099	15.5748	15.5232	16.3536	17.1704	13.8477	16.483	15.4132	15.7349	15.9962	16.0623	16.3499	15.9655	16.7093	15.967	15.9727	14.9863	16.0474	15.4704	16.164	15.346	18.2852	17.1976	15.6355	15.298	15.0063	15.2014	15.368	15.426	17.6582	16.0682	17.1452	15.9576	13.896	16.1781	15.9082	16.4728	18.1983	16.2084	15.6334	15.0184
SERPINA3	15.594	15.6387	16.416	15.7994	17.7855	17.037	16.0334	16.8008	16.5097	15.2297	14.516	14.6208	15.6195	15.3083	15.4895	15.7232	15.5603	14.8436	15.4606	15.0501	15.5638	16.6333	15.8813	15.4222	15.229	15.959	15.046	15.8963	15.4202	17.6841	16.5202	14.8965	15.3856	15.2757	15.0483	14.8347	15.0405	17.5545	16.2593	17.5948	15.456	14.9461	15.8388	15.6656	16.7921	17.7507	15.138	15.6384	15.0521
AGT	12.9616	13.4667	14.9058	13.5816	14.309	12.3177	13.4498	14.2079	14.4608	13.5874	13.68	14.4073	13.42	13.9511	13.2843	13.8306	13.312	12.6085	12.9265	13.9932	11.1125	13.7294	13.7383	13.657	13.9009	13.4651	13.3817	12.8392	14.1196	14.877	13.482	14.0623	12.4795	12.6871	13.0632	13.7752	12.9522	14.6879	14.485	15.2789	15.6452	11.9021	13.5402	14.4425	13.5774	15.9861	13.1375	14.2616	13.1909
A2M	16.4634	17.5872	16.9984	16.1888	16.8406	16.3429	16.9464	18.1376	17.0434	16.1415	16.248	16.8062	17.3053	16.4574	17.4678	16.4562	15.0412	16.3251	15.964	17.0802	16.0054	17.8015	16.4871	16.114	16.4475	16.4111	17.1445	16.2884	16.3382	18.9636	17.5907	16.508	16.1521	15.8229	15.6996	16.1322	17.3345	17.8704	15.693	17.2667	16.2412	16.2556	16.3979	16.766	16.2186	18.3166	16.8107	16.839	15.7545
C3	17.5155	18.6508	18.1914	17.1828	19.839	17.7602	18.0063	18.9785	18.1674	17.3262	17.1572	17.6228	17.9583	17.7165	18.2967	17.2096	17.5758	17.1126	17.5132	17.5219	16.9862	18.4675	17.9336	17.2065	17.5041	17.8217	17.4956	17.4407	17.7142	20.0653	18.5789	18.047	17.5405	17.5447	16.7444	17.6591	17.8001	19.0909	17.2668	19.8238	17.1886	17.8933	17.7795	18.0795	17.5567	19.1902	18.0347	17.6567	17.1509
C5	14.1368	15.0832	14.642	13.4308	17.1972	14.5087	14.8969	15.8128	14.8216	13.3297	13.2124	14.2251	13.9816	13.8623	14.6131	13.9623	13.5613	13.5684	13.1555	14.0686	13.4076	14.7428	13.9204	13.729	13.6711	14.1295	14.426	13.4411	13.5036	16.648	14.4154	14.2701	14.2429	14.6896	13.6026	13.6115	14.2423	14.7904	13.979	17.7202	14.6505	14.3698	14.0859	14.4751	14.4298	16.3497	14.2288	14.0823	13.7738
TIMP1	14.3013	14.8624	13.9176	13.7402	14.0789	13.1115	14.7102	15.213	13.6533	12.7618	12.3361	12.503	14.4533	13.3986	13.6041	12.7116	13.0838	13.1174	14.0952	13.3337	13.1338	13.3311	13.1753	13.2198	13.179	13.5652	13.1287	13.7324	12.2954	15.8602	14.538	14.0575	13.5676	13.0917	14.4079	13.9407	12.3298	13.3071	10.1961	15.0255	14.2962	13.5091	14.5488	13.593	13.0482	15.2116	13.3918	11.4856	12.7561
CST3	15.2492	15.352	14.2034	14.9895	15.3295	14.6352	14.9895	14.9279	15.0859	14.3195	14.6573	14.3734	14.2049	15.3162	14.7417	15.0091	14.2709	14.4379	15.145	14.5048	14.4128	14.751	14.9782	14.9127	14.4939	15.1561	14.226	14.969	14.0594	15.5721	15.2501	15.2327	14.4344	14.1001	13.9871	14.9346	14.7011	14.6859	13.7301	13.7325	14.2149	14.6058	14.5534	14.0235	13.5132	15.6802	14.4829	13.8252	14.0207
KNG1	14.6205	15.5394	15.4046	15.2407	16.2746	15.3881	15.882	16.1307	16.0913	14.7931	14.6091	15.3364	15.0979	14.7543	15.6489	14.9653	14.8085	14.9581	14.6287	15.392	13.715	15.4942	14.7748	15.0819	14.5925	14.4046	14.7986	14.9175	15.1736	16.6742	15.789	14.7941	14.9042	14.5231	14.3928	14.8652	15.1018	16.0023	13.9955	16.2107	15.1112	14.9069	14.6498	15.0096	15.2932	17.2945	15.399	14.9036	14.9724
NRAS	15.8434	15.7422	14.8169	15.5649	15.6032	15.723	15.181	15.4824	14.9618	16.0283	15.0076	15.0433	15.7359	14.6987	15.1537	15.2868	15.7146	15.942	16.1548	15.3319	15.4008	15.724	16.2089	16.4237	15.6097	15.1581	15.697	15.9921	15.2276	15.3262	15.2228	15.0721	15.8708	16.1128	15.6331	15.6046	15.6271	15.4725	14.8086	15.2036	14.9149	15.2565	15.3872	15.5841	15.5678	15.401	16.0497	14.6644	15.3263
HRAS	14.1778	14.5571	15.3049	15.4613	13.2461	14.804	14.6824	13.5303	14.6577	14.6614	14.7641	13.6529	14.9779	14.537	13.0945	13.6984	13.9873	14.8399	14.5182	14.5702	14.0195	15.3409	14.2743	14.5193	14.5535	14.1324	14.7696	14.5691	14.6701	14.2052	12.8611	12.7545	14.6432	14.5894	14.0434	14.5188	14.3802	13.0747	13.294	13.555	14.4362	13.2282	13.9129	11.7859	14.9941	15.5249	11.8814	14.43	14.5805
KRAS	12.6483	10.412	12.7071	9.69668	11.1667	12.3152	9.71659	13.253	12.8404	11.4685	12.9895	12.9523	10.2798	10.9392	10.3278	12.5529	11.219	11.1598	12.7473	13.0557	12.2947	11.7197	10.4579	12.1952	11.7467	10.6347	11.954	9.06223	11.6313	12.0074	11.4993	11.662	11.6329	11.5468	12.4201	11.5665	12.6778	9.14295	10.1391	11.7832	11.3767	10.3278	13.1029	10.8109	10.5665	12.3575	13.2134	15.2298	13.2855
LDLR	11.4462	14.8558	14.4166	11.5275	15.04	11.7529	13.9673	14.3409	13.1456	13.3879	14.2404	13.9973	13.4619	12.7009	13.9117	12.6438	12.9683	12.439	12.0308	13.0075	12.0355	13.8319	10.8369	13.4803	12.3815	12.4636	12.7104	11.6131	12.0029	13.5165	13.8147	12.3078	11.2228	13.8019	12.3539	11.4759	12.4127	14.5072	10.7949	13.4117	10.9974	7.97145	11.5085	10.8737	12.7559	12.0305	11.7663	12.959	11.8475
JCHAIN	13.2461	15.7331	13.1972	16.6796	13.7036	14.2489	13.6077	15.1853	16.8095	14.5549	13.8534	14.6488	13.279	14.2862	14.7011	14.1952	15.0694	15.2741	14.9363	14.5886	14.2231	14.8197	15.9015	16.7814	15.3113	15.0223	13.9631	14.3625	14.1344	15.3504	14.7407	14.0921	13.2332	13.7167	15.9676	13.9107	14.6638	15.0909	15.548	15.2375	13.1086	14.1198	15.2928	14.8404	14.3284	16.4979	14.7309	15.86	13.2866
IGKV1D-33	16.7733	13.3751	12.893	13.7973	13.7391	12.8245	13.771	14.7638	13.6903	12.798	12.9478	13.1749	14.5792	13.1154	14.2997	14.3384	13.0364	13.1459	14.1554	12.6825	12.9027	14.5308	13.115	13.1604	13.7309	13.6418	11.8619	13.8078	12.5713	15.2722	14.5219	12.5368	13.7291	13.4123	13.216	13.7044	12.5966	14.09	13.2197	14.6498	13.3935	12.4651	12.9531	13.4567	12.9936	14.8917	13.1471	12.4845	13.1559
IGKV3-20	15.3961	18.3864	16.9502	17.3095	16.915	16.7321	16.6946	17.3524	16.9149	17.0366	16.7383	16.6362	17.4013	16.9061	17.3136	16.4748	16.2096	16.992	17.1876	15.6133	16.4057	17.5455	17.1837	17.5901	16.9596	17.0886	15.563	17.2404	16.7257	17.4907	17.8428	15.8622	16.6373	15.876	17.5346	16.8499	16.1351	16.834	14.2738	18.0035	16.8979	16.0782	18.0175	15.9634	17.2551	18.2064	18.3203	17.1916	15.6224
IGLV1-47	12.9163	14.2986	12.3855	15.1369	13.0866	13.2294	13.6871	13.5001	14.1157	12.6195	12.1176	12.9044	11.9169	13.1348	13.3654	14.0503	12.0762	13.4872	13.4024	14.0527	11.5207	14.0736	13.3567	13.2398	13.2071	13.0113	11.3114	13.1169	13.0852	15.1611	11.3806	10.4749	13.2852	11.9025	13.9058	14.0016	12.2522	14.5828	10.299	13.7408	12.3179	11.8912	12.0892	12.7218	12.4139	15.6247	13.8826	12.5771	10.9995
IGHV1-69	11.0002	14.2011	13.1783	14.1404	13.7926	13.5322	13.2565	13.9836	13.694	10.9429	11.4684	13.961	12.9683	13.2925	13.2929	12.7262	12.2203	13.0088	12.2402	12.1517	12.1013	14.3491	12.3945	13.7642	13.0624	13.3158	10.7833	13.4748	12.0169	12.6977	10.955	11.6405	13.7311	12.2398	11.2701	12.5957	11.0365	13.669	11.6308	13.3356	11.6941	13.2775	12.4917	10.7303	12.4342	15.0763	13.7872	13.7126	12.7326
IGHV3-7	13.779	16.2329	14.597	15.5105	15.5571	15.1182	15.3629	15.4966	15.6407	14.6646	14.3835	15.2944	13.6399	14.7935	14.4994	14.3968	14.1132	15.0263	15.0608	14.9673	14.0001	15.6975	15.2248	15.7146	14.9324	14.8814	14.1004	15.0438	14.8018	16.2037	14.4315	14.604	14.9807	14.6685	15.0905	14.4953	14.459	15.5882	12.8689	15.8843	13.723	14.4925	15.1838	14.3039	14.0912	16.2412	15.4715	15.3019	14.679
IGHV4-39	10.5736	13.3173	12.3165	13.6928	13.9544	11.4748	12.6977	14.1544	14.3165	12.2166	10.3995	13.2531	12.6846	10.9836	12.3626	13.8807	12.484	12.0778	12.786	13.4263	11.5206	14.2208	12.5008	14.4521	12.8925	13.2302	13.5754	12.0306	12.5414	15.9849	14.2017	11.1821	11.8777	12.1498	11.433	9.90931	11.2296	15.2721	13.0094	15.2456	11.8144	13.2417	14.3628	13.3455	12.2654	16.0192	13.2229	12.7621	11.1445
PIGR	14.5773	17.7412	13.4821	17.5959	14.0902	16.1442	14.6001	14.4062	16.8721	14.4582	17.3343	16.9244	15.8716	14.367	14.2086	18.0381	17.7469	17.9737	14.6185	16.2996	13.6348	14.949	14.3291	16.8037	15.6117	14.5987	16.7789	14.0605	15.4672	16.0048	16.1437	15.9049	15.6799	13.7172	18.6269	16.6119	14.6941	15.1731	15.5898	15.359	17.6388	14.4295	16.7295	17.7666	18.0972	15.5924	14.4456	16.1013	13.6608
IGKC	17.6714	18.8893	17.8334	18.9062	18.0808	17.4819	17.6167	18.5509	18.6214	17.6542	17.4031	18.0462	19.7331	17.449	18.2401	17.9705	18.4264	18.2529	18.3756	17.3887	17.1685	18.3002	17.872	18.1089	17.7888	17.7107	17.0845	18.0005	18.268	19.1321	17.8882	17.0642	18.1674	17.5091	17.6459	18.2465	17.1761	18.3326	17.467	18.0984	18.7278	17.8067	17.8657	18.5276	18.756	19.3306	18.6103	17.6756	17.5386
IGHG1	17.1833	18.5953	17.3977	17.7287	17.5186	17.1748	17.6433	18.5494	17.8876	17.2819	16.9524	17.4543	19.1353	17.5436	17.6377	17.5868	16.9185	17.8556	17.9922	17.2805	16.6512	19.0686	17.5726	17.3412	17.4349	17.452	16.9804	16.6294	17.65	18.8189	18.0968	17.4586	17.5461	17.4903	18.1276	17.8128	16.7837	18.1489	16.7721	19.0079	18.3399	17.6908	17.8053	17.6911	17.6741	19.2509	19.0302	18.1689	17.6736
IGHG2	17.0276	19.5489	17.5675	18.7919	17.8566	16.9819	16.9533	17.6893	18.6234	17.4037	17.5942	18.1017	17.4314	17.1837	17.4007	17.4724	16.9229	17.5727	18.275	18.2782	15.998	17.7528	17.5695	17.7341	17.1627	17.3425	16.5152	17.7117	17.5928	19.3252	15.1818	16.7194	17.9797	17.4661	17.4971	17.6907	16.8949	17.3521	16.5926	18.9324	17.4961	18.4095	18.1212	17.7294	17.9667	18.7819	18.1822	17.7604	16.8601
IGHG3	19.4767	21.9316	19.7924	20.3356	19.7076	19.7136	19.6348	19.8727	20.8706	19.8817	19.2506	20.014	18.9751	19.3257	19.5999	19.5504	17.9715	19.8537	19.5559	19.9529	18.9099	20.3342	19.3586	19.2858	19.122	19.3653	19.0208	19.4651	20.0352	19.6825	18.9657	19.0172	19.8398	19.7015	19.7188	19.525	19.5283	20.5374	18.3355	20.1342	19.2253	20.3069	19.2896	18.6421	18.9485	21.3845	20.7534	19.9716	19.9405
IGHG4	12.525	14.5416	14.38	12.4594	14.2472	13.1397	12.5749	15.5538	15.2699	13.6801	13.3716	14.1024	15.1494	13.1372	13.4644	14.717	13.8137	12.5245	14.3399	14.7354	13.4198	15.0126	13.337	13.1883	12.8225	13.2441	13.3534	14.5266	13.9494	15.1999	13.6567	12.5704	16.0407	13.4554	13.2221	14.1667	13.9774	15.5185	9.30752	15.3363	13.0233	14.5469	13.9251	13.679	13.6774	15.3437	14.9267	15.4246	13.0049
IGHM	14.0773	17.3488	15.3157	15.8874	18.1125	14.9394	14.7667	19.0068	17.0698	15.5195	16.2938	15.4011	16.7234	16.1102	15.837	16.458	16.7569	16.6156	14.8424	15.9484	14.1946	17.1033	16.0444	17.5716	15.9757	16.5677	16.1861	15.9668	16.4163	18.6571	17.2115	15.3792	15.8836	14.5727	15.9891	16.6566	15.8434	17.5804	14.5637	18.7887	15.8629	15.0845	16.1188	16.3557	16.2765	16.6831	15.8524	16.7295	15.2672
IGHA1	17.8441	18.6886	15.956	19.2332	17.559	17.012	16.554	17.8625	18.9981	16.9794	16.6843	17.6682	18.1523	16.4215	18.4732	18.2394	19.6338	18.5745	17.3663	17.7075	15.9196	17.8931	18.5532	18.2665	17.0302	17.9761	16.7831	16.6676	17.374	17.642	18.105	16.5918	16.9058	16.7904	18.1973	17.9409	16.8844	17.8937	15.3104	17.7718	16.9431	17.0133	17.3735	18.4456	18.3398	20.4753	18.4875	18.5615	16.1512
IGHA2	14.978	18.0213	13.7885	18.4699	15.7271	15.5153	14.5214	16.478	17.8423	15.8167	14.7871	16.3794	16.0776	15.5522	17.4496	17.1433	17.6316	17.0979	16.5203	16.0563	14.421	16.6198	17.9181	19.2064	16.6864	16.9137	15.1151	15.1621	15.8034	16.6723	16.847	16.2666	15.2872	15.1035	17.5174	16.4086	16.4644	16.8561	13.7048	16.6649	15.1101	15.0756	16.641	16.4427	17.367	20.2182	17.627	17.3405	14.1926
HLA-B	12.1629	14.3198	13.5473	14.7024	12.9497	15.4954	14.5286	16.056	15.3624	14.3325	13.7786	15.2241	14.9129	14.1584	14.0267	14.0966	15.9984	14.5394	12.9746	14.9647	15.2227	14.5244	14.7777	13.703	14.9167	13.3333	16.591	14.9232	12.4572	15.5624	15.0621	14.492	13.7852	13.7496	13.1951	15.572	14.8754	13.4978	12.9733	16.8001	15.3448	15.0269	15.0912	14.9038	12.1666	15.8503	13.5143	13.833	13.7567
HLA-H	17.234	19.586	17.6707	17.9335	17.7012	17.846	18.6396	18.0243	18.3363	17.187	18.0007	18.555	18.5462	18.0474	17.6627	18.2175	18.4094	18.0852	17.4929	16.8698	18.1476	18.1482	17.9358	17.5233	17.6416	17.6307	19.8861	17.855	17.1274	18.0038	17.8314	17.979	18.8759	17.7332	16.6153	19.0825	17.7542	15.9696	16.9799	19.0828	17.8112	17.7354	18.1364	17.4716	17.222	17.7525	16.9236	17.6508	17.4665
HLA-DRA	14.549	15.7768	15.2429	15.3809	14.3257	14.5299	14.9192	16.6336	16.456	14.7725	15.1477	15.4759	15.0597	15.1108	14.4072	17.7191	15.9509	16.7348	15.2409	14.338	14.3267	15.1457	14.8646	15.1237	14.7522	14.9312	16.8365	14.699	14.6805	16.3441	15.8921	15.2903	15.2865	14.1141	14.2734	16.3024	13.8977	13.8622	14.5713	16.0485	15.9891	15.7091	15.9788	15.3246	15.0911	16.2904	15.3515	15.3356	15.064
HLA-DRB1	14.5367	14.3451	13.8122	14.4512	13.4366	13.8415	14.4473	14.884	15.9657	14.0083	14.0265	15.1439	14.229	13.5625	13.9164	16.5782	15.091	15.2983	14.6004	14.3397	14.5487	14.5158	14.3284	14.8535	14.0768	14.4397	15.6931	13.996	14.6118	14.6927	14.1369	14.7838	14.6271	14.1215	13.408	15.6688	14.4494	13.3917	15.2278	14.8626	15.1213	14.8748	14.4569	14.5415	13.6191	15.3165	15.4372	14.5039	14.1186
HBD	16.5367	16.0962	18.5406	18.7168	18.1316	18.2241	18.234	17.3488	18.8503	18.5892	18.8579	18.2983	19.0295	17.7291	19.25	19.1743	16.867	18.7026	18.3285	17.6526	15.9325	18.9427	18.2024	18.6101	17.7572	17.9879	18.9939	17.2896	18.0113	19.0928	17.4686	17.6113	17.8948	17.075	15.5615	17.3242	18.0536	16.3484	17.9605	17.3921	18.8891	18.7172	17.6337	18.1727	18.1296	19.5196	18.6492	18.308	18.5565
HBE1	10.9153	9.50081	14.2644	14.071	12.6337	13.1188	13.7769	12.6518	14.6036	13.1133	14.2766	14.2899	14.4244	12.0969	14.1119	13.6363	11.7464	14.0652	12.9584	13.1079	10.4633	14.5697	12.5402	13.1084	12.0447	12.1191	14.4032	11.155	13.0105	14.4586	10.6655	12.6301	13.3053	11.3491	11.1421	12.1207	13.6586	11.7451	12.8116	10.9888	14.9302	14.2189	12.3522	12.2302	12.4104	14.9232	13.8872	12.2232	14.1538
COL1A1	18.9765	20.8357	17.3421	16.6966	17.9632	18.7643	19.4831	19.8235	16.9103	17.9002	16.4148	17.7981	16.2422	17.3121	18.5057	16.8307	16.1522	16.542	19.0472	18.2138	18.6683	17.5589	17.7264	18.2457	18.8473	17.3298	16.5826	19.6047	17.5655	18.8108	20.1031	18.2676	18.6424	18.7087	18.0977	17.0757	16.3143	19.1152	16.4919	18.7675	16.7579	19.8783	17.4319	16.3739	18.4362	18.2527	18.6078	16.8929	17.8852
COL3A1	15.2947	17.0472	13.8375	13.7106	13.8609	14.2477	15.1673	15.8775	13.0399	14.8432	12.7975	14.5931	13.325	13.6878	14.5943	15.1843	13.7378	12.8755	14.7036	13.8344	14.1857	13.9038	15.0196	14.8067	15.0694	13.2216	14.9577	14.2442	14.6924	15.5407	15.0915	14.4401	15.4244	15.7159	15.0363	12.8775	13.2263	15.2448	10.3767	14.209	12.9135	14.3841	15.0718	13.552	14.9525	16.53	13.8985	13.6231	14.52
COL4A1	15.9341	15.4344	13.7075	14.846	14.7494	13.8643	14.6988	16.2817	14.3435	14.8296	12.9841	15.328	15.4292	13.4273	14.4767	14.4742	15.7197	14.0137	14.4842	15.0344	13.4883	14.1265	14.4367	14.7417	14.8875	14.2297	14.7486	14.4003	14.917	14.6328	15.1774	15.6717	15.4414	13.8425	13.7078	15.1164	15.4585	16.0317	11.4104	13.7462	15.9626	14.937	14.7398	14.9162	14.495	15.8811	15.8461	13.6187	14.353
CRYAB	14.1271	14.4036	16.8932	11.6348	14.8966	15.1022	15.3309	17.643	14.7617	16.0148	10.4981	16.7556	14.9867	13.1427	13.3341	15.3827	15.0193	13.0786	16.3733	14.3665	15.0392	14.3201	14.3459	15.1268	15.5324	13.7768	15.7141	16.8691	14.33	13.7505	16.847	14.7014	15.7031	15.2615	14.6805	13.1142	13.2694	20.6297	10.9492	14.734	13.5214	15.5159	14.1965	13.7615	15.2766	13.342	16.6835	13.8375	14.3788
LMNA	17.8422	17.4539	17.4783	16.967	17.9043	17.6681	17.8279	17.3894	17.9112	17.4289	16.421	17.9876	16.1451	17.5416	17.5831	17.6556	17.0181	16.7539	18.1977	17.9618	17.916	17.5396	17.8606	17.7437	17.3693	17.069	17.1141	17.715	17.702	17.7956	17.8371	17.847	18.147	17.8956	17.3731	16.7664	17.1862	18.0765	16.762	17.4126	15.7336	17.7696	17.6138	17.0838	16.5515	17.607	17.9054	17.4877	17.8205
SPTA1	11.5743	12.6106	13.6214	12.991	13.2694	13.018	12.8223	14.2037	13.9064	13.4537	12.6351	11.4521	13.6875	11.5407	13.5246	13.5718	12.1055	12.4928	13.7269	11.0046	11.4354	13.3307	12.7429	12.3254	12.1224	11.6043	13.5337	12.3271	12.6141	15.0762	12.3751	13.6365	14.4765	11.4453	11.7328	12.8536	12.4078	12.446	8.15528	12.3863	13.5285	13.0981	12.4693	12.2754	12.9271	14.1393	14.0144	12.6194	13.1504
APOA1	17.5481	18.6283	18.4516	18.1184	17.9002	17.3222	18.3661	18.806	19.4567	18.1759	18.0462	18.8036	18.9837	17.6509	18.2528	18.3247	18.322	18.0625	18.0602	18.3682	16.5937	18.2968	18.0243	18.3374	17.8317	17.9497	18.1591	18.1776	17.795	19.7257	19.1627	18.3404	17.9995	17.4567	17.1396	17.0033	18.1406	19.7303	18.3613	18.7676	19.0363	18.3682	17.7164	18.507	18.4761	19.8231	17.919	18.0814	17.7845
APOE	13.0888	13.371	12.0436	11.9892	14.8742	12.0324	12.856	14.5191	13.4757	12.4643	11.8665	13.5896	12.8122	12.2176	13.1184	12.1981	12.8448	12.2132	12.7787	13.1065	11.6343	12.691	12.1098	13.2172	12.3971	12.1666	12.873	12.4157	13.084	14.4263	12.8153	12.4874	11.889	12.7194	11.5658	11.7976	11.9345	14.3984	12.3449	15.5438	13.4908	13.4476	12.2892	12.6565	12.5446	14.6142	12.1062	12.2623	12.6678
APOA2	10.3443	13.4003	12.5401	12.5298	12.0656	10.1648	12.4842	12.6648	14.1247	11.273	11.5458	11.9876	13.2578	10.676	12.1417	12.1877	12.0518	11.4146	11.7099	12.5437	10.3782	12.3878	12.1834	12.2493	12.0043	11.9073	12.7147	11.8585	11.8687	14.5172	13.9785	13.0674	12.9482	11.195	10.3772	12.0537	12.8243	15.5293	13.6154	12.8237	12.6544	10.6902	11.1741	12.1769	12.4979	15.8445	12.5739	11.2644	12.4972
APOC2	11.1391	13.432	11.191	11.8878	11.7149	11.9054	12.1869	12.4094	12.805	12.2592	11.1331	12.7892	11.9404	11.2092	12.2485	12.9774	12.0379	11.4455	11.4699	12.2525	11.3856	12.6551	10.9207	12.6554	11.931	11.722	12.7643	13.6583	13.1315	13.3239	12.323	12.2922	12.3944	11.4795	9.5802	11.5927	11.1345	14.0648	10.8524	13.5072	12.7087	12.6808	11.7678	12.4473	12.3236	14.243	12.22	11.0285	12.442
APOC3	12.3777	14.4049	14.3541	14.4338	16.7885	12.8913	14.7609	14.8278	15.3197	13.2022	13.8282	15.2463	14.2435	12.7623	14.9686	14.3086	14.8195	13.8342	13.4245	14.3546	11.9074	14.521	13.1621	14.7258	13.3021	13.4649	14.6462	13.2172	14.2781	18.0252	14.9919	14.4611	13.7594	12.7913	11.316	12.0736	13.1665	15.3345	9.24753	15.5486	14.7236	14.6983	13.2859	14.6298	14.3035	17.0676	14.8724	13.5256	14.2507
FGA	16.5424	17.7544	18.8118	17.204	21.7038	17.3583	17.4463	18.5636	17.7042	16.7416	16.5728	18.1907	17.3651	17.6147	17.45	18.1724	17.1348	17.1571	16.9792	17.2562	15.8338	18.8834	17.5682	16.7122	16.5979	17.5775	17.69	16.4195	17.7728	20.0094	17.2365	18.6489	18.4428	18.6733	16.0726	17.0317	17.3199	17.3717	18.3026	21.237	20.076	18.3831	17.1998	17.6551	17.8373	20.836	17.3003	17.1416	17.791
FGB	15.9159	16.9497	17.9993	16.1625	20.5322	16.6267	16.7544	17.5864	16.9425	15.8554	15.5877	17.3373	16.1008	16.8408	16.8982	17.0402	16.9417	16.5674	15.8771	16.6339	15.2331	17.7903	16.1679	15.6086	15.464	16.8015	16.609	15.6424	16.8254	19.0332	16.3853	17.7861	17.4329	17.8696	14.5728	16.1995	16.9513	16.7617	18.7686	20.5743	18.9571	16.8234	16.6335	16.8298	16.7015	20.0311	16.9534	16.5537	17.3807
FGG	16.5957	17.223	18.2815	17.0389	21.9094	17.6467	17.6922	18.6368	17.082	16.5696	16.774	17.8015	16.9589	18.073	17.9912	17.6243	16.4456	17.345	16.9835	16.9165	16.015	18.9439	17.6508	16.7705	16.5815	17.7848	17.235	16.4793	16.8778	20.3581	17.175	19.0801	18.3929	18.9035	15.7723	16.8799	17.8381	17.577	17.8431	21.459	18.397	18.1519	17.5184	16.8934	17.3197	21.1595	17.8585	17.0461	17.8501
SLC4A1	14.1706	14.6629	17.4954	16.4882	16.9229	16.459	16.5713	16.1222	16.9878	16.491	16.829	16.3612	16.8216	16.2023	17.1195	17.4443	15.334	16.6516	16.4334	14.6439	15.1299	17.2367	16.2415	16.5121	16.1401	16.3056	17.4096	15.5573	15.6523	16.9375	16.2828	15.6235	15.6729	15.1675	13.5894	15.0017	16.5766	14.4143	16.8639	15.6665	16.9613	17.0727	16.0448	16.2503	15.6652	17.5263	16.7626	16.2228	16.7691
APCS	17.9887	16.987	15.748	14.3884	16.0054	16.0072	15.8107	17.316	15.8639	14.7735	13.2008	15.2469	15.1552	14.1171	14.9919	14.7224	14.6355	13.9671	16.3486	15.6001	15.8514	15.0554	14.6541	14.0642	14.5264	14.9551	14.2318	15.2855	15.1535	16.7405	16.2155	15.1441	16.9589	15.6753	14.6445	13.7549	14.7436	18.2133	13.7927	17.6467	15.2016	16.3813	15.8841	14.9945	15.2096	16.8457	16.7433	14.3541	14.7618
C1QA	14.698	15.4483	14.2881	13.9149	15.4011	13.6204	15.3629	15.094	14.626	12.9416	13.4649	13.8997	14.1431	13.7964	14.1505	13.7589	14.1866	13.8269	14.1612	13.9507	14.3215	13.6963	13.5839	13.4901	14.0158	14.4034	13.5602	13.6695	13.842	16.126	13.6128	14.3621	14.8086	14.2387	13.2693	14.2235	12.8633	14.2128	14.5953	16.219	14.5463	14.1657	13.6669	14.2499	14.6885	15.5531	13.6292	13.4251	13.6338
C1QB	14.7688	14.895	14.6948	13.7906	16.0225	13.493	15.2488	15.4711	14.9535	13.6291	13.3178	14.4595	12.3123	14.2362	14.3274	14.7179	14.6227	13.4782	14.5327	14.4205	13.4006	14.7974	13.2323	13.3389	13.8909	14.0298	14.5425	13.0306	14.8203	16.1707	14.0889	14.4145	14.9352	14.1403	13.2605	14.1892	12.8826	15.1967	16.2743	15.9925	15.4302	14.7401	13.2705	13.5668	14.9693	15.7057	14.4509	13.2847	14.5336
C1QC	15.1387	15.2416	14.8995	14.6431	15.5283	14.2007	15.1472	15.2653	14.927	14.7074	14.2558	14.6502	13.6828	14.3194	14.771	14.303	13.9808	14.3813	15.0956	14.1583	14.7365	15.0035	14.8155	14.8351	14.6288	14.7397	13.7713	14.4581	14.4991	15.9916	14.7728	14.2094	14.8304	14.1148	13.6614	14.6789	12.9348	13.253	13.181	16.2608	13.4808	15.3658	14.754	14.231	14.0929	15.4512	14.4708	14.3209	14.5332
C9	15.6242	15.3775	15.3365	17.3884	17.8916	14.7442	15.1846	16.6682	15.5592	14.5362	13.6733	14.6276	15.57	14.8625	14.8292	14.7826	14.3466	14.2842	14.5211	14.8609	15.1009	15.128	14.7978	13.9205	14.0986	14.7671	15.4541	15.0591	14.5629	16.9492	15.1135	14.9163	15.1817	15.0619	14.3849	15.077	14.674	16.2697	15.9109	18.5574	15.5006	15.3849	15.069	14.8249	14.8273	17.6268	15.2386	14.8308	14.7034
APOH	13.9242	14.8398	14.2566	13.6014	15.6196	12.9007	14.3543	14.3112	14.7663	13.4104	13.349	14.3178	14.1075	13.6937	13.9929	13.8618	13.9596	13.492	13.9509	14.3259	12.8033	14.4263	14.9847	14.4598	13.6944	14.3614	13.6181	14.0529	13.6072	15.7829	13.4327	13.5754	14.1524	13.9287	12.8212	13.739	13.5481	14.4612	9.46892	15.1724	14.172	14.0604	13.2666	14.6808	13.3291	15.1487	14.2408	13.7719	14.4818
LRG1	14.7291	15.7937	15.2258	14.2739	16.4182	16.0368	14.7889	15.4095	15.2577	14.0281	14.3926	14.5684	15.1334	14.8564	15.8553	14.5018	14.2572	14.0898	14.8819	14.4504	14.1164	15.6941	15.1883	14.8414	13.9004	14.8187	14.5417	14.5609	14.1111	17.3908	15.7024	14.5	13.7735	14.0408	14.6435	15.1652	15.7768	16.3764	12.0489	16.3457	13.6126	14.3091	15.2829	14.2783	15.2156	17.1689	15.5837	14.6722	14.3589
FN1	17.8014	18.8001	17.5608	16.7867	19.3419	16.8246	18.4991	19.0176	16.2792	16.7611	16.2068	17.0468	16.2057	17.578	18.2534	16.8267	16.6079	17.3573	18.7893	18.2371	15.9722	17.2054	17.4423	16.4306	16.9007	17.8008	15.8406	17.6235	18.3342	19.5961	18.2591	17.5528	18.3144	18.5476	17.9228	17.123	16.1038	18.3814	16.2647	19.0346	15.1871	18.0066	17.1263	16.7393	17.2662	19.9099	18.2794	17.0878	18.3057
AMBP	13.8015	14.6713	14.3483	15.295	13.9757	14.437	15.2237	14.1591	13.776	14.6434	11.975	14.9417	15.8104	16.1203	14.1574	14.9428	14.744	14.6858	12.6901	14.0786	14.6223	12.8805	14.4223	14.353	13.3992	13.6392	14.7234	13.6805	12.9056	14.6318	14.3155	13.7283	13.7339	14.8178	12.9375	15.7142	14.1141	14.6576	15.5257	14.9901	14.1899	14.7911	12.8944	14.2538	15.0882	16.0221	14.3262	12.6611	12.8932
ORM1	16.0179	17.4786	16.7817	15.7545	17.8549	17.5988	16.5253	17.081	17.5538	15.8711	15.3014	15.9644	17.1677	16.2694	15.9023	16.4168	16.7247	15.3666	15.2934	16.2863	15.1944	16.9386	15.6011	15.9522	15.8485	16.4071	14.7337	15.969	16.0555	18.7984	16.4839	15.8023	15.6833	15.5391	15.4527	16.2365	16.1444	17.6255	16.4246	17.8286	17.0781	15.8198	16.6113	17.0063	17.6644	18.5996	15.9719	15.9246	15.6997
AHSG	13.7036	14.8887	14.8026	15.0079	14.1522	13.8967	14.7748	14.7069	15.2455	14.2708	13.5728	14.1943	14.9781	13.8855	14.4762	13.8769	14.1352	13.8606	13.8485	14.7642	12.852	13.8101	13.7894	13.9079	13.5467	13.519	13.9029	13.8531	14.2423	15.1756	14.6346	13.8534	13.8769	13.3596	13.6508	14.1972	14.4547	15.6429	15.3272	14.2682	14.8424	13.9461	13.4351	14.0412	14.683	16.1821	14.2976	13.7638	13.8638
TTR	14.4346	16.2007	15.2684	15.1934	15.5702	14.7861	15.0459	14.8392	16.7723	15.0472	14.6975	15.3967	15.5123	13.9976	15.7508	14.6329	14.8166	13.9909	15.4859	15.8305	11.7921	15.2969	14.5349	15.5624	14.7598	14.4701	14.2972	14.5289	15.4915	16.8574	16.403	15.2762	14.2803	14.305	14.0134	14.1815	14.6238	16.3164	13.5037	15.4668	14.274	14.7927	13.6506	13.4964	14.8843	18.1298	15.2725	14.7036	14.448
GC	12.9563	14.1771	13.7318	13.6963	14.1851	13.9591	14.1354	14.5145	14.0332	12.9814	12.6545	13.1208	14.3265	12.9474	13.7188	12.8206	13.653	12.8965	12.7817	13.5042	12.977	13.9279	13.5312	13.4144	13.2436	13.2883	12.1952	13.4163	13.3787	14.6453	13.7359	12.7176	13.5669	13.2613	13.4115	14.6914	13.3816	14.4131	12.3548	14.1244	13.8426	14.1158	13.8844	13.3536	14.249	16.0052	13.8737	12.7642	13.2709
TFRC	15.8071	18.1969	17.4378	16.5949	17.11	16.5725	16.0898	16.0541	15.7634	16.5983	17.6023	17.073	16.4087	17.2023	16.4158	17.8105	16.5428	16.6678	15.6968	16.3895	15.4679	16.9691	16.611	16.1272	16.2314	16.5034	16.9441	16.8132	16.1752	16.0259	16.1849	16.7963	16.1277	15.8762	17.8598	17.1024	16.2015	16.2423	17.8109	17.115	16.7992	15.9192	16.5479	16.4864	18.1846	15.716	16.3279	17.0163	17.5717
TF	16.8839	18.952	18.0245	18.0098	16.8606	17.4255	18.277	17.431	17.9637	17.3779	17.1875	17.4946	17.5897	17.0889	17.5587	17.4699	16.9743	17.1629	16.9794	17.4768	15.6038	17.3538	16.7003	16.8207	16.7195	16.6715	16.8844	16.8344	17.1386	18.9997	17.4666	17.2704	16.8832	16.8798	17.3202	17.1737	17.0696	18.7709	16.821	17.8125	17.6357	16.9968	16.5253	16.9612	17.4726	19.1352	17.7465	17.2414	17.3751
LTF	14.999	17.5575	18.7882	16.8286	18.678	16.986	18.5851	19.4022	18.1322	16.05	18.0367	19.1085	18.8946	17.7044	19.2217	16.8877	17.2486	17.2833	15.4669	18.5099	14.4512	16.7353	16.55	15.2035	15.5097	16.063	17.0243	15.4413	17.7845	19.4781	16.6569	18.4764	17.4053	18.0336	15.79	17.9534	17.4652	14.5501	17.5381	19.6788	19.2446	16.8485	17.6112	17.8424	17.3471	19.9934	17.2882	16.9155	17.2133
HPX	15.0756	16.7579	16.5083	16.5227	15.885	16.1151	16.5328	15.7281	17.712	15.9752	15.1196	16.132	16.5958	15.3232	15.7485	15.425	15.8342	15.5043	15.0449	16.6511	13.9357	16.0132	15.4948	15.3102	14.788	15.4022	15.3548	15.238	15.8206	17.5341	15.5578	15.0786	15.666	15.5039	15.1828	15.4207	15.6184	16.6456	15.3799	16.1379	16.4804	15.3342	14.9749	16.3223	16.872	18.6531	16.0363	15.2944	15.2837
FTL	17.2399	15.5072	14.6622	16.1958	16.3816	15.1149	16.0727	16.8882	16.268	14.5228	15.1475	15.494	16.2525	14.7113	16.2102	15.5231	15.5396	15.0171	16.7527	16.1314	15.1533	15.3251	15.4458	15.8327	16.1478	15.352	15.8336	15.8556	15.4242	16.7061	17.4031	15.8756	16.5664	15.1367	13.4586	15.5872	15.3497	14.8457	16.0767	17.0094	16.1254	16.272	16.6482	15.6256	15.1563	17.0824	16.2258	15.2629	16.1569
FTH1	16.5867	16.6091	16.2092	16.1663	17.2068	15.6527	17.2502	17.6116	17.1233	15.3115	16.0132	17.5642	16.6814	15.3692	17.1487	16.729	15.9779	16.0531	17.3056	16.7628	16.0026	15.7617	15.7762	15.747	16.769	16.0407	17.1569	16.7575	16.8378	18.646	18.0672	17.2419	17.0142	17.0612	14.5637	16.2653	16.13	15.588	17.8838	17.7092	17.4853	17.3128	17.734	16.0935	15.8966	18.0718	16.9877	16.1051	16.7972
MT-ND1	14.6119	13.2227	14.7809	12.9154	13.4647	14.2468	14.777	14.148	14.2297	14.7619	13.5147	15.3183	13.9328	13.6657	12.3607	14.7248	13.5272	13.3166	14.9424	14.227	14.6699	14.2502	13.6387	15.2252	14.5361	14.078	15.2121	13.9213	13.8247	14.4325	15.1913	13.7307	14.2835	15.1536	15.3202	13.3929	13.9998	17.059	14.0164	13.8492	15.5421	14.5847	14.267	14.6022	14.1391	13.6462	15.1811	13.5198	13.4473
MT-ATP8	15.3512	15.2049	14.8576	14.6548	13.093	14.853	12.7755	14.8816	15.205	14.5514	14.523	16.1051	12.5491	14.3215	14.9714	14.5151	12.65	14.8703	15.4556	15.2606	16.0547	14.9334	15.2262	15.7544	15.5039	15.4796	14.8312	14.4773	12.4316	14.4588	14.5344	15.1937	13.8891	15.2098	15.4562	8.31717	15.8083	16.4307	11.4547	15.2461	13.5587	14.6652	15.7567	12.8782	13.6291	13.9069	16.4362	15.4648	15.2333
KLKB1	11.631	12.3107	12.4777	12.119	12.2211	12.0177	12.7581	13.1334	12.2125	10.886	12.244	12.007	11.7931	12.0704	11.7558	11.1478	11.2635	11.0279	11.8718	11.7896	10.9399	12.248	11.8854	11.1275	11.2099	11.9543	13.0077	12.5279	11.9923	13.2031	13.0867	11.2427	11.1621	11.0981	12.6288	10.7002	11.9897	13.1081	11.8306	13.8457	10.9409	11.1491	11.1847	10.4402	10.8528	14.1353	11.9301	12.1392	11.5622
C4BPA	14.6014	16.1037	15.4481	14.9013	17.3418	14.7543	15.436	17.0971	16.1199	14.2934	14.9034	14.7547	15.4876	14.8795	15.4361	14.5997	14.3988	14.8558	14.8285	14.6476	13.8166	15.641	15.3526	14.3454	14.6529	14.9192	15.248	14.2389	14.7188	16.8896	15.3263	15.3734	15.3485	14.9652	13.7716	14.9245	15.1406	15.5696	13.9572	18.0946	16.3364	15.6165	14.7685	15.2285	15.0434	17.2747	14.9637	14.9063	14.8616
VTN	16.369	16.0721	15.587	15.334	18.1585	16.1807	15.7347	17.2171	15.8319	15.2205	14.6602	15.5164	15.6804	15.1845	15.4172	14.2772	14.3291	14.9741	15.6542	14.8171	15.0406	15.4962	15.1751	15.419	14.925	15.0431	15.4913	15.4868	14.852	17.7777	15.1914	15.4818	14.915	15.2652	14.0742	14.8099	14.3467	16.1682	13.7059	19.9108	16.5699	15.1063	14.8436	15.523	15.1833	18.4209	16.0118	14.407	14.5933
CAT	15.513	15.6735	16.1054	15.5709	15.4653	15.7515	15.7517	16.4193	16.155	16.3047	16.1104	15.9404	15.5291	15.6508	16.5943	17.0049	15.2414	16.0278	15.2653	15.6158	14.5951	16.0039	15.7792	16.0048	15.5766	15.8764	15.934	15.7418	15.4624	16.6093	15.7641	15.8405	14.4263	15.4025	15.9036	15.4135	15.6719	15.8576	15.0413	16.4387	15.9264	15.679	15.8424	15.3451	15.3769	16.6271	15.8575	16.0063	15.954
RAF1	14.6177	14.7536	13.6788	14.181	14.0726	13.6511	13.6212	13.3077	13.707	14.0121	13.6625	13.7447	12.7028	13.5051	13.7977	13.9919	13.0745	14.0193	13.626	13.8408	13.6121	13.5352	13.6815	13.5939	13.6219	13.3785	13.8098	13.636	13.6878	14.2693	13.8677	13.8584	13.8311	13.8141	14.1361	14.2907	14.3782	13.7766	10.2417	14.3938	14.0653	14.2782	14.5839	13.0399	13.0481	14.0149	13.6437	14.1237	14.3544
GBA	13.3389	12.493	13.5698	13.3566	13.672	12.7219	13.3047	12.5197	11.9102	11.9663	12.9658	12.9101	14.2706	12.6482	13.0836	12.9418	13.7885	12.8585	12.7413	12.3412	12.389	12.9497	12.5755	13.4437	12.6931	11.927	13.6587	12.5444	13.623	13.9488	13.5765	12.945	13.1324	12.7961	12.0298	13.5876	13.133	12.0212	10.5091	13.313	13.39	13.0762	12.3009	13.8397	13.8359	13.6478	12.9714	12.1857	12.4611
FUCA1	15.7411	15.6664	15.3265	15.9317	15.5126	16.8749	15.4268	15.5172	16.1785	16.5699	15.5733	15.4303	15.8188	15.3988	15.5944	16.029	16.4203	15.5465	16.3079	15.432	15.6571	15.9745	16.7667	16.874	16	15.6081	16.1222	15.2252	16.0994	15.7457	16.5926	15.4285	15.4591	15.4228	15.2125	15.5966	16.3073	15.3293	12.6669	14.8563	14.7199	15.4148	15.6212	16.5523	15.6873	16.1201	16.4941	15.639	15.4012
ALDOA	19.1615	19.1714	19.0903	19.1006	18.134	19.0923	18.5684	18.8336	18.638	18.7099	18.6974	18.2298	18.1902	18.7859	19.1749	19.0288	17.5508	19.0592	19.0742	19.0872	18.4734	18.7802	19.2274	18.9399	18.6661	18.7069	19.611	18.7138	18.2921	18.7069	19.066	18.8412	18.6544	18.6058	18.8677	19.0046	19.1867	19.4014	17.5628	19.054	18.3614	18.2098	18.8876	17.784	18.2655	18.8654	18.9293	19.3876	18.8334
CSTB	15.9735	15.888	15.1402	15.9323	15.15	15.9784	16.136	16.3015	16.1546	15.6815	15.506	15.911	15.0889	15.8714	15.3426	15.5571	15.8255	15.7877	16.6736	16.6428	14.9293	16.1998	16.6658	16.5218	15.232	15.2368	16.0966	15.2788	15.6209	15.6589	15.4579	15.6554	16.2661	15.6806	16.0128	15.461	15.2062	15.2357	15.7405	15.2423	14.8064	15.502	15.4176	15.1468	15.0476	15.6631	16.0678	15.8565	15.7747
ANXA1	16.0082	16.2058	16.1788	15.9776	16.93	16.84	17.6502	18.0015	16.3826	15.6847	15.3908	16.8386	16.7975	16.5564	17.1076	15.6946	16.1837	15.623	16.2539	16.9649	15.446	15.6547	16.1815	15.9456	16.1523	15.5054	15.7129	16.4369	15.9655	17.7447	16.5073	16.4825	16.7586	16.7644	15.4282	16.3486	15.3113	16.024	16.2211	17.5035	17.289	16.3812	16.6715	15.6827	16.2198	17.523	16.0796	15.6048	15.7905
APOB	15.3572	16.2198	16.6725	15.668	17.7727	15.5539	15.3088	16.2598	16.7477	14.2693	16.0889	15.8038	14.6855	15.5034	15.601	16.2225	15.1752	15.3852	15.2252	15.8424	14.4319	16.6801	15.6803	15.1427	15.4282	15.0851	16.3268	14.5859	15.3899	17.3426	15.6294	16.1316	15.8325	14.7908	14.078	15.1741	15.7234	16.6074	16.2525	17.7976	16.4326	15.9657	16.4549	14.4898	15.3385	17.2466	14.6873	15.747	15.1016
SOD2	15.991	16.275	16.6755	16.4108	16.2469	15.7409	16.8541	17.5894	18.0079	16.1195	16.4681	17.5927	17.5972	16.5268	16.817	17.221	17.6866	17.0091	17.1299	16.7985	17.2311	16.8596	17.5873	16.561	17.0604	16.5384	17.2718	16.6768	16.8697	17.6217	16.3586	16.7639	16.8199	17.6225	16.9978	16.6916	16.6382	16.4086	17.1769	17.9065	17.6586	17.1933	16.6108	17.1033	16.7271	16.6708	17.5441	16.4955	16.7005
OAT	11.2482	12.6002	16.9432	14.1823	13.8302	10.1178	14.1249	14.8615	14.9424	15.8859	13.8002	16.0387	13.3231	16.2222	13.6502	13.5207	14.3071	16.3556	14.6192	13.6385	12.2683	13.5478	12.1062	11.9572	14.3122	16.177	13.8069	12.0525	13.7811	14.6963	13.7774	15.8631	15.0452	14.3675	17.5246	13.5859	15.6096	16.4887	11.8848	15.3475	14.7724	14.2006	15.5648	12.8387	11.9867	11.4265	13.7407	13.7105	13.3225
HRG	14.0513	15.7406	15.0116	14.4025	16.3173	13.9334	14.9379	15.5169	14.9355	14.4176	14.7705	14.8751	14.1436	14.3064	14.8188	14.1158	14.6004	14.0599	14.9633	14.6313	13.1272	14.9775	14.6197	14.2452	14.4953	14.4571	13.4359	14.2605	14.683	15.9917	15.4357	14.4004	14.2273	14.2824	13.7226	13.8507	14.4541	15.2662	14.962	16.0956	15.5356	14.0281	14.7711	14.7784	14.3489	16.446	14.7752	13.7057	13.912
THY1	17.0123	17.4802	16.6041	16.0075	15.9865	16.5776	17.2515	16.835	16.3647	16.7262	15.6289	18.0052	15.6289	15.6794	16.588	17.033	16.5937	16.3808	16.9559	17.0592	16.54	16.4431	16.1638	16.0899	16.8542	16.5678	16.4728	17.0709	17.0922	17.3434	16.7614	17.1679	17.3901	17.7383	16.6902	16.4525	16.2771	16.2902	16.6772	15.9727	16.476	17.6868	16.9113	16.91	16.21	17.863	17.1394	15.8853	17.1727
A1BG	14.039	14.7005	14.6649	13.8678	15.5616	14.7367	14.9254	15.7511	15.7974	14.0187	13.893	14.7983	14.67	14.3153	14.8618	14.4861	15.0773	14.2818	13.8077	14.6958	13.7165	15.2935	14.9748	14.8791	14.341	14.2415	13.8836	13.9645	14.1108	17.443	16.0451	14.6306	14.1576	14.0769	13.4853	14.162	14.9017	16.6051	12.3385	16.0303	13.6518	13.8346	14.5883	13.2804	14.4663	17.4559	14.3955	14.8391	13.9063
CD74	15.3152	15.3335	15.1764	15.581	13.258	14.7254	15.0956	15.6525	16.4302	14.2482	14.8642	16.1171	14.8947	14.8656	15.3844	17.0902	16.1205	15.5264	14.6325	13.6284	15.08	14.7801	15.0982	15.5188	14.6676	14.8071	16.202	14.9412	14.8826	15.3145	15.9044	15.0825	14.6215	13.4071	14.0332	16.2074	13.9063	13.4061	13.5195	15.5223	13.8325	14.0076	15.6515	15.4978	15.1304	14.9792	18.5436	17.0283	14.8582
KRT6B	14.6935	15.6287	15.198	15.9357	14.8627	15.6086	15.799	14.7985	14.2942	15.1323	14.4319	15.5935	15.7787	16.6654	14.4697	14.7314	14.7811	14.917	15.1103	14.6457	14.4684	14.3847	14.4935	14.896	14.9346	15.2002	13.8249	14.7913	14.6243	15.1683	14.6489	15.1148	15.21	14.7647	15.3901	14.5475	15.0681	13.8606	15.9064	15.0209	16.8301	17.4771	15.7867	16.3417	14.6501	15.6431	14.5014	14.3967	14.8211
KRT1	16.2019	17.0478	16.3289	18.6253	17.1291	17.5958	17.6074	17.0991	16.1809	17.7091	16.6257	16.739	18.4358	16.0718	15.5361	16.3937	16.603	17.4275	15.9951	16.493	15.7001	15.174	15.868	15.6862	16.2834	16.1056	15.9501	16.5402	16.8448	17.0854	16.1537	16.4797	17.0899	15.7028	16.7161	16.4868	16.8688	16.4415	17.4	16.3923	18.3598	17.8528	16.0296	18.3008	16.8391	18.4718	15.9371	16.0264	15.7152
VWF	13.7406	13.8414	14.1764	13.838	15.2682	13.9741	14.6357	14.8169	14.334	13.2486	12.4906	14.8018	12.2778	13.7008	14.6714	14.0612	14.1302	13.7387	13.6405	14.5003	13.8571	14.4111	14.1501	14.0718	14.6219	13.5508	13.9748	13.9993	14.0744	15.3859	14.9906	14.4522	14.6938	14.8929	13.4203	14.0601	13.4525	14.1865	10.8763	14.8088	15.1139	14.5599	15.256	13.8573	13.8052	15.1147	15.0643	14.7783	14.2059
TUBB4A	14.6371	13.4021	15.0741	15.1093	15.1468	15.4245	15.3706	14.9219	15.3634	15.0159	14.8245	15.0348	15.3526	15.029	15.379	15.7201	14.9805	15.6532	15.2371	14.941	15.1568	14.6517	14.3756	14.8243	14.3171	14.6715	15.244	14.8488	15.1563	14.8424	15.413	14.3969	15.0136	14.5157	14.695	15.5828	14.6941	14.7756	12.4934	14.4883	14.8295	14.4225	14.798	15.0814	15.8875	15.2498	14.7308	14.8773	15.0338
GAPDH	20.01	19.8601	19.9084	19.9705	19.9351	19.923	19.8389	20.0328	19.3617	19.9075	19.5088	19.8305	19.9619	20.0083	19.8311	19.8851	19.5388	20.208	20.081	19.8905	19.7724	19.4441	19.6139	19.777	19.5926	19.9778	20.1844	19.5762	19.668	19.7648	20.1556	19.5946	19.8586	19.7336	19.5944	19.6471	19.8871	20.3512	19.1508	19.4419	19.8477	19.3339	19.6593	19.4108	19.7286	20.0633	19.5644	19.9479	19.7572
ASL	14.475	14.7651	13.9081	15.2268	13.8675	14.197	13.9485	13.1783	14.2048	14.3931	14.5149	13.2058	15.0679	13.8017	14.8322	13.6942	12.8726	14.072	14.6054	13.261	14.6849	14.4109	15.0277	14.8076	14.4056	14.6735	14.8423	13.6169	14.104	14.0688	14.2053	14.0206	13.4567	14.3151	14.8284	14.4805	15.6088	13.4479	14.5747	13.0774	13.8739	14.7439	13.8247	13.5767	14.0088	13.7207	13.2648	14.9437	13.7723
HLA-A	16.6627	17.2305	17.5404	18.0604	17.5364	16.9534	17.8416	17.1095	18.113	16.9931	17.7158	18.3582	18.2455	18.2331	17.4687	17.7301	18.521	17.5827	17.3797	17.3018	17.3947	17.701	17.5203	17.1603	17.0646	17.4768	17.3758	17.433	16.7895	17.5509	17.4939	15.9439	18.2423	17.4	16.5786	18.4817	17.0171	15.8574	17.2669	17.5403	18.6074	16.8079	16.2854	17.8623	17.4293	18.2138	17.0898	16.22	17.4275
ERBB2	13.936	13.7473	13.0338	13.5693	14.5217	13.749	14.0764	13.369	13.6159	13.3997	13.3994	14.0333	13.7855	14.2397	13.6301	13.6179	13.083	12.8086	13.3085	13.9748	14.0185	13.6103	14.1532	14.0685	13.5516	13.5	14.0681	12.4461	13.7346	11.9842	14.0526	13.8831	13.3231	14.1691	14.0331	13.4379	13.8527	13.6358	14.9538	11.8982	13.633	13.4372	14.3674	13.7095	13.652	13.2633	13.5606	13.3184	13.6345
CAPNS1	16.7531	16.3582	16.4872	16.2036	15.8513	16.4521	17.009	16.5423	15.9262	16.5546	16.3809	16.3624	16.432	16.4714	15.7971	15.9003	16.7645	16.2343	16.2589	16.8049	15.8832	16.3011	16.6885	16.4887	16.337	16.0374	16.6447	16.1685	15.8778	16.0032	16.1732	16.4341	16.343	17.0041	16.5003	16.4761	16.3121	16.5089	14.2555	16.1634	16.5395	15.9837	16.37	16.1759	16.3441	15.9968	15.9381	16.3972	16.3201
HSPB1	18.6742	16.4212	16.8907	16.2368	16.9667	16.5708	18.3971	17.2717	16.226	17.7224	15.1611	16.7266	17.0306	16.2288	16.7882	16.5368	16.1309	16.5611	17.1357	17.6264	16.8483	16.796	17.985	17.3874	16.7786	17.8908	17.2148	17.0507	16.613	16.997	17.2162	16.3716	17.4086	17.276	16.8445	16.1621	16.3757	18.447	16.4913	16.7003	16.2901	17.5965	16.4584	16.5141	17.5465	16.2689	17.4656	17.7861	16.5567
CYBB	14.0849	15.2487	14.9088	14.312	15.3394	14.1192	15.0364	15.9159	14.5557	12.9839	14.0955	15.5793	15.518	13.7162	15.5168	14.2981	14.5461	13.9676	14.2301	14.829	14.1407	14.4136	13.8959	13.3462	14.1582	14.3158	14.3737	13.6914	14.0147	15.6934	15.2306	14.5345	14.1102	13.9496	14.249	14.6028	14.3172	14.7966	15.1551	15.9632	15.4932	14.6505	14.3732	14.3609	14.7777	16.1471	14.0175	13.7785	13.5986
RPN1	17.1166	17.5888	16.8691	17.3083	16.7881	17.293	17.0596	16.8153	17.4265	17.1808	17.1825	17.5778	17.663	17.0979	17.0282	17.6559	17.5709	16.978	16.9364	16.9891	17.1931	17.055	16.8712	16.8072	17.0056	17.2734	17.8444	17.1879	17.0731	17.0867	17.3129	17.1666	17.4072	17.3537	17.1108	17.2224	17.287	17.1905	17.3853	16.9032	18.1862	16.434	17.1499	17.8195	17.5287	17.3489	17.4736	17.1197	17.1792
RPN2	15.8482	15.0581	15.5555	15.7552	15.4544	16.2352	15.8366	15.607	15.9997	15.7657	15.6432	16.1233	16.9515	15.6038	15.9862	16.2623	16.1554	15.7498	15.528	15.6969	15.915	15.7385	15.6392	15.6238	15.8118	15.964	16.5215	15.9449	15.6751	15.972	16.2372	15.9909	16.056	15.8812	15.6681	15.6365	16.2407	15.9745	15.7607	15.0664	16.6623	14.4386	15.8512	16.4152	16.3185	15.975	15.6035	15.6727	15.7895
GNAI2	15.2657	16.4768	15.7462	15.0982	16.1262	15.9125	15.9051	16.5963	15.5121	15.437	14.9337	15.7928	15.1825	15.3574	15.629	15.4919	15.8985	15.2724	15.4401	15.7487	15.4988	15.4796	15.1895	15.3835	15.4539	15.1639	15.4486	15.4758	15.4677	16.4539	15.8158	15.9127	15.6501	15.5665	15.1413	15.5555	15.0025	16.0453	16.3387	16.8298	15.489	15.294	15.8989	15.4127	15.6389	16.8441	15.5609	15.227	15.1266
H2AC8	16.7666	16.9707	16.2713	17.19	17.6817	16.7886	16.5584	16.9809	16.1097	17.3972	17.1236	17.3232	16.3724	16.4774	17.0565	16.7516	16.4116	17.1825	17.4367	16.2989	17.4782	17.8907	17.1543	17.2589	17.4686	16.8687	16.3934	17.1728	16.5989	16.8378	15.7731	16.9431	16.8811	16.4608	16.3119	16.3281	16.0642	15.7643	17.8154	16.9917	15.6415	17.6038	15.6529	14.9919	16.4856	17.0824	17.2029	16.8742	17.3508
SLC4A2	12.5287	16.1473	11.5133	8.88019	12.5773	12.1325	12.8547	12.903	12.9869	12.6211	12.8778	13.3432	12.792	12.5727	12.8174	14.0146	12.3721	12.5865	12.9473	13.0976	12.9032	13.2069	12.9845	12.9868	9.91265	12.6801	12.1773	13.1599	12.3338	12.8809	12.1364	13.8435	13.2478	12.4005	12.7653	13.1126	14.1354	13.3182	15.5997	13.0699	12.6759	13.4958	12.1529	13.2429	13.8087	12.5917	13.2224	14.2228	13.258
ATP1A1	19.1641	19.969	19.0488	19.293	18.6142	19.2628	18.5449	18.3796	18.4801	19.6173	19.3725	19.0628	19.3519	18.7254	18.278	19.3299	18.9093	19.0022	19.3363	18.3475	19.5454	19.5417	19.6082	19.3574	19.2934	18.9772	19.7808	19.0805	19.2963	18.2712	19.0659	18.9525	19.3053	19.1003	19.4782	18.3909	20.2886	19.3628	19.3797	17.96	19.6842	18.769	18.6595	19.0581	19.197	18.3602	18.5008	19.3058	19.2326
ATP1B1	16.89	18.4824	17.9447	17.7666	17.8993	18.3098	16.9524	16.018	17.8211	18.6186	17.8123	17.8286	19.0551	17.2916	16.6241	17.9695	18.7628	17.9459	18.3482	17.1627	18.6352	18.3828	18.6907	18.3431	17.8817	17.5637	18.57	17.4304	17.6071	16.8114	17.9265	17.3898	18.2254	17.886	18.5468	17.3427	19.3673	18.1458	18.0903	16.9216	19.3704	17.4312	17.8039	18.9799	18.683	17.3758	16.8801	17.9821	17.6911
ALDOB	10.6248	12.8348	16.4044	14.5785	11.0828	12.6171	11.8687	12.64	13.8344	13.0422	13.5247	14.5245	13.8607	11.7234	11.0472	12.2941	11.3191	12.8258	11.1744	13.6059	13.6188	12.7494	13.7086	13.1265	12.3668	13.1748	12.8405	11.791	12.592	13.4921	11.7153	15.2201	12.8302	12.9603	11.4666	12.1337	13.9705	12.0488	10.7905	14.7387	13.9802	12.5834	12.9947	14.1274	5.09993	12.6915	13.2028	12.7524	12.587
APP	14.7035	14.3796	14.5646	13.995	14.9139	14.7279	13.7836	14.5631	14.8648	14.5813	14.9445	14.8127	14.6597	15.1824	15.4235	15.1612	14.1842	13.7065	14.9596	14.8706	14.9247	15.8017	14.984	15.1187	14.3247	15.5932	14.9444	14.8687	14.8562	13.0736	15.114	15.0747	14.2238	14.8807	15.4339	14.9493	15.4513	14.5798	13.8056	13.2177	14.0393	13.8731	15.8174	13.8621	14.2877	14.3297	14.8382	14.7583	14.773
ARG1	13.6425	9.81969	13.264	10.1507	13.8597	12.3495	12.7167	13.3884	13.233	12.5282	12.3525	13.4839	11.1313	13.416	13.6798	12.0016	11.5232	12.3567	12.5761	12.8938	9.59317	12.6763	12.4983	14.2401	12.8212	14.4185	12.74	12.7272	12.7671	14.9802	10.8461	13.1305	11.761	12.4166	13.3539	11.0276	11.4412	10.687	12.094	14.2537	12.1927	12.1515	13.5144	12.3715	11.6346	14.3274	11.8081	12.5731	12.2014
APOD	14.4133	15.039	15.1172	14.4249	14.3765	13.3617	14.5976	14.8793	15.5105	14.2249	14.3984	14.0448	12.8888	15.0574	14.694	14.7945	13.4459	14.7417	14.7425	14.2542	14.2395	15.3422	14.6	15.2471	14.4207	15.0185	13.9391	14.1638	14.4603	15.8633	14.4136	14.9136	13.8789	14.2681	13.6952	14.198	14.432	14.6164	14.9325	15.0007	13.4937	14.065	14.2584	13.0179	13.6709	15.8312	15.002	14.6499	14.521
ALDH2	17.5151	17.1645	18.0593	17.8497	16.93	17.5782	16.6845	16.492	16.7442	18.138	17.7439	17.3399	18.3298	17.0689	16.7933	17.2008	17.9076	17.5534	17.6324	16.6495	17.2338	16.9955	17.6118	17.7167	17.7262	18.2914	17.0025	17.4962	17.7528	16.2189	17.4652	16.7399	17.3576	17.6841	17.9442	18.0585	17.7419	16.7494	16.553	17.4565	18.5854	16.7674	17.1649	18.3188	17.9304	16.9384	17.1386	17.2874	17.8267
ITGB3	12.4824	13.9933	13.0333	11.8649	13.9163	13.4619	15.0513	12.6512	11.7351	11.8708	12.3355	13.828	12.999	11.6177	12.6973	14.1293	13.9504	12.0141	11.7848	12.555	12.0825	12.3914	13.6883	13.4854	11.3349	10.966	14.7293	13.0586	14.1769	12.5993	12.454	13.4571	12.1779	13.5588	12.7013	10.8097	12.8592	13.5433	13.2469	13.5785	13.9041	14.4978	10.1767	13.7759	12.7348	14.0866	13.512	7.75406	12.4948
ITGB2	15.4115	16.0381	15.5162	14.32	16.5408	14.4524	15.5101	17.0183	15.3071	14.3898	14.6407	16.1775	14.8001	14.5361	16.4284	15.3921	15.1662	14.5649	14.9571	15.1257	13.7902	15.2066	14.7478	14.5834	14.8045	14.1683	15.1129	13.7581	14.9518	16.8178	14.5021	15.8167	14.9214	15.0731	13.9821	15.3053	14.2715	14.3374	14.709	17.5505	15.4533	15.4479	15.2209	14.5611	14.3632	16.9888	14.7444	15.053	14.6702
S100A8	17.4129	18.4976	18.5569	17.9366	19.3169	18.1378	18.8152	19.6608	18.9701	17.0619	19.0183	19.4609	17.6189	18.7042	19.3857	17.7204	16.9888	18.3077	17.1625	18.9283	16.3005	18.1317	18.1462	16.7769	17.0795	17.4785	17.6361	16.6875	18.3009	20.1477	18.277	18.9057	18.3964	18.2681	17.3669	17.3701	18.5982	16.2894	17.9111	19.6063	17.6004	17.2695	18.622	17.644	17.1069	19.7183	17.3115	17.9319	18.2368
SLC25A5	18.1189	19.0121	18.8883	18.4719	17.7855	17.7804	17.7682	17.7451	17.5451	17.943	17.816	17.8122	18.571	17.7771	17.4362	18.6257	18.8029	18.139	18.0955	18.3721	17.5997	18.0352	17.9801	17.5556	17.8168	17.6505	18.0031	17.7736	17.8996	17.4546	18.2394	17.9361	18.3722	17.4318	18.2912	17.808	18.4153	18.8183	18.3692	17.4786	19.5897	18.5754	18.2243	18.8329	19.1236	17.6775	18.2091	18.2659	17.7717
SERPING1	15.9404	17.0296	16.1605	16.2746	17.4918	16.1369	16.6054	17.3173	16.8738	15.6954	15.7038	16.1059	16.1453	15.8903	16.2954	16.0018	15.9086	15.6967	16.1471	16.2403	14.8536	16.7164	16.0999	16.168	15.824	16.0139	15.412	15.8286	15.8313	18.2075	16.7506	15.7596	16	15.6357	15.2112	15.8414	16.0455	17.2807	15.7899	17.8023	16.2641	15.6521	16.1858	16.0517	16.3626	18.1754	16.0093	16.1347	15.9045
CFI	12.2196	13.7812	12.395	12.4757	14.0841	13.1169	13.6962	14.2212	13.2712	12.6208	12.0533	12.4381	13.0409	11.1309	12.0811	12.4432	12.2963	10.4959	12.591	12.8533	11.5685	13.5723	12.3337	12.1084	11.8308	12.7065	12.4442	13.3233	12.1464	14.971	12.7262	12.5919	13.6886	12.5877	11.9606	13.3529	12.3196	13.1651	9.65054	14.1244	13.0491	11.7449	13.3281	12.6328	13.6042	14.2352	13.0427	11.5259	11.818
ISG15	12.4296	12.971	10.1254	13.2201	12.0273	9.08337	14.1315	12.1416	11.5857	11.7562	10.9242	11.8095	4.71449	13.4272	11.6306	10.1794	12.8792	12.3966	11.7276	10.2029	11.3652	12.0982	12.6085	11.9922	12.8587	13.0054	9.01467	11.3389	9.7354	14.0517	3.09891	12.751	12.0628	12.3279	13.2788	12.8549	11.9992	11.9383	17.0505	14.4681	13.0877	12.9791	10.0216	11.9299	10.9425	6.85721	12.6886	12.0508	6.60839
MPO	12.3994	16.1747	15.8929	14.4643	17.099	14.7154	16.6384	17.1903	16.0397	13.7916	16.1315	16.7728	16.7531	15.8472	17.3129	14.8524	15.7168	15.2071	13.828	15.8091	14.2417	14.7916	14.5742	13.7591	14.0199	14.3787	14.189	14.1452	14.5689	17.4027	14.7544	16.1339	14.837	15.8134	13.7485	14.9579	15.3574	15.5026	14.1928	17.8699	16.7831	14.9531	15.5168	15.6314	14.9542	17.7959	15.0297	14.1464	14.6975
PCCA	12.7997	15.2828	15.0592	15.2018	12.8587	15.055	13.5266	13.6394	14.544	15.5415	15.7286	14.5981	13.7914	14.0294	12.9758	14.6589	15.2259	15.4104	15.5586	14.3425	15.5425	14.086	15.5695	15.4518	15.5491	15.8565	14.3807	15.6708	15.6483	13.5539	14.0177	14.9675	15.4708	14.8743	16.4152	14.6304	16.7039	15.3491	14.1751	13.6397	13.5213	14.9051	13.9543	15.3591	14.2712	13.0308	14.576	14.2574	14.0483
PCCB	12.6442	15.0048	14.3643	14.6311	14.0178	14.7808	12.7827	13.3547	14.6235	15.1422	15.391	14.6162	13.4695	13.3434	12.7225	14.6101	14.723	15.1785	15.0593	14.421	15.4136	13.5366	15.1062	14.9886	14.9844	15.6143	14.2506	15.0152	15.2203	13.923	13.5647	14.409	15.3702	14.5105	16.5814	14.7235	16.3494	15.2371	9.41211	13.4516	13.2263	14.5484	13.855	14.8469	14.2658	12.7843	14.2184	14.1799	13.9471
ALPL	12.1451	11.7003	11.1073	13.0369	13.261	13.4846	10.7594	12.4584	10.9221	11.4083	11.1107	12.4532	11.5819	11.1915	12.4323	11.9318	11.2597	12.0646	12.9855	11.8914	11.3391	11.6534	13.7796	12.4532	11.6064	10.546	11.6657	12.5179	11.5578	14.1248	10.8977	11.3551	10.9149	10.331	10.9853	11.3943	11.1185	11.6542	10.3742	12.604	11.8696	11.1631	10.7429	11.275	11.1263	13.7704	10.8965	11.3721	11.3089
EIF2S1	15.7561	15.9442	16.0957	16.0224	15.9165	15.8081	16.2395	15.8891	15.9939	15.6799	16.3027	16.0202	16.0275	16.3732	16.1798	16.1186	15.6611	15.9431	15.7035	16.4212	16.3225	16.2089	16.031	15.817	15.8889	16.072	15.8674	16.1955	15.2973	15.8469	15.7719	16.1769	15.458	15.6185	15.8663	15.6799	15.9079	15.8286	14.9581	16.5821	15.6753	15.5466	16.1013	15.4371	15.9418	15.3336	16.1979	16.3642	16.1501
ICAM1	13.5868	13.9198	14.5611	13.984	14.3694	13.7723	14.928	14.9135	13.2652	13.6214	13.5481	14.1084	14.1254	13.7956	14.3153	13.4335	13.9511	14.1987	14.0844	13.8095	13.787	13.8158	13.8976	13.8009	14.3345	13.8927	14.0284	13.9756	14.4595	14.851	13.8736	13.7833	13.188	13.8758	13.0284	14.8676	12.371	13.7966	15.1539	14.5976	14.5144	13.9434	13.2883	14.0657	14.0387	14.6438	14.8165	13.6999	14.2537
RPLP1	13.7962	13.2851	16.0688	15.8219	16.3642	15.2744	16.4624	15.5587	15.9126	15.4222	15.4162	15.6503	17.2832	16.2235	14.6821	15.6174	15.7704	15.1532	15.9024	15.9914	16.242	14.9257	14.5792	15.2058	15.3009	16.9573	15.8296	15.1732	15.76	17.3012	14.8551	15.1226	15.5284	15.7443	15.2865	15.5377	14.543	15.1729	15.1923	16.208	16.6242	13.8625	14.5456	16.217	16.4405	16.4511	14.6402	14.1369	16.0366
RPLP2	15.0305	16.5518	15.4306	15.4885	15.9554	15.6746	15.5016	15.5893	15.6311	15.7033	15.5992	15.6974	15.6588	15.5279	15.5427	16.1719	15.8136	15.4148	15.4235	15.7284	15.5791	15.4695	15.0956	15.3362	15.3695	15.513	15.2873	15.6946	15.948	15.6166	15.6907	15.7942	15.7606	15.7958	15.7112	15.0407	16.3541	16.1164	17.312	15.5481	14.9723	15.8404	15.8173	15.4149	16.2459	15.8814	15.143	15.2015	15.2631
RPLP0	17.4369	17.2182	18.1166	17.4314	17.6367	17.4595	17.3218	17.4521	17.7003	17.5934	17.4551	18.2012	17.837	17.6467	17.4329	17.7858	17.8086	17.3421	17.3132	17.9005	17.5147	17.5139	17.0104	17.3414	17.3489	17.4292	17.7355	17.2466	18.1286	17.326	17.224	17.5181	17.3098	17.3846	17.2462	17.7651	17.5357	17.0129	17.8933	17.3954	17.9517	17.7133	17.654	18.1115	17.7043	17.5064	17.5629	17.3968	17.7508
FABP3	14.04	13.6331	14.7774	13.9012	9.47677	12.6446	13.5919	13.8148	12.2276	13.6804	10.4201	11.9208	12.2137	12.4741	12.1388	11.9832	15.3113	15.245	14.047	12.6628	14.1698	13.7411	13.2101	13.4404	13.9757	12.5041	13.0121	14.543	12.6679	11.9	13.9694	13.3818	13.9128	11.6223	17.3827	12.4343	13.8081	15.1533	13.9441	12.1433	13.8983	16.7276	13.4647	10.6664	13.3673	12.5139	13.6004	12.2439	13.6798
CLEC3B	12.0654	12.3633	11.747	11.7493	11.63	10.2485	11.941	13.2594	11.2414	11.5074	11.3513	11.795	10.7709	11.3473	11.829	11.9362	11.2195	10.9319	12.4561	12.323	10.924	11.4944	11.989	11.6068	11.4097	11.8267	10.0901	11.5254	12.1736	13.3077	11.9669	10.887	12.4413	12.198	10.8913	12.9187	11.3185	12.521	9.45736	10.0463	11.9652	13.1983	9.47567	10.8904	11.4643	14.2438	11.6306	11.1591	11.867
SSB	16.0581	16.4298	16.0111	16.486	16.3891	16.2504	16.4811	15.9202	16.8917	16.2882	16.9921	16.5617	16.7232	17.1626	16.3639	17.0279	16.9111	16.4536	16.3668	16.9052	16.6575	16.6318	16.3609	16.4708	16.4746	17.0842	16.5376	16.9761	16.8928	16.4824	16.0249	16.4475	16.6353	16.4312	16.8015	16.5462	16.4021	16.587	17.8147	17.3475	17.0835	16.7562	16.105	17.3161	16.4488	16.0162	16.036	16.6018	17.24
SERPINA7	14.5575	13.059	15.13	15.9026	12.9195	11.5867	11.8927	12.3359	13.08	13.044	11.0199	12.3659	12.7387	13.0741	11.9552	12.0426	12.1519	10.9141	11.8182	12.4493	10.3955	11.7623	11.8506	11.6215	11.4131	11.7618	12.6638	11.4408	10.998	14.2931	12.7893	11.3431	13.7585	13.2569	11.2977	13.9568	11.7844	12.5797	11.5229	12.5712	11.9711	11.8809	11.3994	12.0447	12.196	13.8275	13.7591	11.6718	12.6952
SERPIND1	13.452	14.5989	14.5486	13.8956	15.1614	13.9083	14.2639	14.4784	15.2718	13.2655	13.628	14.1648	14.2869	13.8792	14.198	13.686	13.8402	13.3036	13.6187	14.3005	12.822	14.7909	14.2087	13.8639	13.6598	14.1542	13.3254	13.3905	13.5682	16.4173	13.4366	14.001	13.7124	14.0922	13.1658	13.3827	13.9578	14.3357	13.4596	16.6958	14.9311	13.6315	14.1339	14.2295	14.0348	15.7257	13.9928	14.0535	13.3549
ITGB1	16.0817	17.1724	15.2868	15.3901	15.3204	15.7381	16.012	16.0835	15.6186	15.7379	15.3668	15.7932	15.6698	15.419	15.7844	15.887	15.8702	15.5659	16.016	15.4261	15.5997	15.4247	15.3872	15.4049	15.3085	15.7485	15.8803	15.855	16.0956	15.7345	15.769	15.6247	16.184	16.3591	15.9663	15.781	15.3741	16.9532	16.2531	15.5836	15.993	16.208	15.6871	15.7204	15.7723	15.7466	15.6719	15.5532	15.5399
KRT18	19.7408	20.5009	20.0425	19.665	18.9205	19.5438	20.1901	19.6946	19.2448	19.7796	19.5098	21.4449	19.4832	19.9279	19.0865	18.6622	18.8726	19.5533	20.1221	20.4164	19.6219	19.7355	19.8535	20.0747	20.102	20.3376	19.3319	19.7792	18.283	19.9865	19.3363	19.6152	19.5385	19.7472	20.2396	17.6602	19.7443	19.4634	18.7973	20.0627	19.9501	19.465	19.9517	18.0077	19.3788	18.5068	19.473	19.4266	19.6816
COL5A2	15.9666	18.3772	15.2765	13.2177	14.3992	13.8324	15.7635	17.0447	15.0313	15.9352	14.3737	14.8515	13.2954	14.6161	15.9829	14.9019	14.3915	14.6455	15.8259	15.3202	15.5805	14.3656	15.0938	15.2482	15.3311	14.0759	14.5485	15.8805	14.9761	16.7855	18.1547	14.0586	16.3106	15.97	15.5882	14.4285	15.0168	17.4239	14.1718	15.5124	12.7414	16.8013	15.0686	12.9777	14.2346	15.7378	16.7613	15.4372	15.3834
UROD	11.5963	13.2607	11.2159	12.0536	12.5884	11.1463	11.7579	11.7491	13.0824	12.6369	10.7149	12.6758	12.7166	10.8814	11.3214	12.2046	11.1367	10.2531	11.043	12.498	11.5561	11.6717	11.6732	11.7943	11.6189	11.749	12.5525	12.0217	12.7673	13.022	11.2686	12.1056	12.2276	11.9032	12.1765	12.1231	11.0336	12.8314	11.1701	8.87658	12.1243	12.0235	10.4666	12.5127	11.8106	13.535	11.9682	10.2255	10.8384
INSR	12.6694	12.8097	13.3503	12.6602	13.3574	12.482	12.5698	13.4934	13.9393	13.4028	12.4808	10.6534	12.6828	12.4642	14.0302	13.228	12.3833	13.4482	12.3107	11.2966	13.5365	12.5317	13.6603	13.2113	12.9279	12.5909	12.5335	11.4235	12.6111	14.2014	12.7204	13.2149	11.8733	13.4283	13.3202	12.1154	13.8774	12.9316	10.9313	12.8262	12.4572	12.3247	13.1916	13.2173	13.3345	11.3295	11.6388	13.4122	13.1998
GLA	13.9933	13.2552	13.4239	12.8726	13.2225	11.6132	13.1691	12.3665	12.9233	11.7004	13.1184	12.5683	10.7074	12.8897	13.1671	13.1678	13.56	12.1494	12.8502	13.3111	11.4354	11.6818	11.2942	12.4868	13.0993	12.6474	13.2894	12.3914	12.6288	12.4897	13.2432	13.0183	12.7066	11.989	12.5771	13.1754	11.8305	12.5037	10.2951	12.8961	14.7279	13.5444	13.1684	12.9171	13.2748	12.1543	13.4812	13.0985	13.0685
IGKV4-1	14.5177	16.9341	14.1951	15.6617	16.4126	15.4857	15.4173	16.856	15.9376	15.0634	14.8757	15.2554	16.9929	16.0688	16.2625	15.4992	16.0839	15.6018	16.0458	14.8962	14.9282	16.5884	15.5473	16.5245	16.278	15.4181	14.5959	16.0404	14.8581	17.2466	16.011	13.7297	16.149	13.9232	14.0475	16.1635	14.2058	16.786	11.3279	16.39	15.5135	15.4253	15.4673	15.4983	16.5924	18.4579	16.5437	14.1066	14.113
GSN	16.4693	16.4597	15.783	16.1301	15.8105	16.5321	16.5297	15.9719	16.3679	15.651	14.8835	15.4255	16.8077	16.4999	16.665	15.4905	16.2388	15.7441	16.7731	16.213	16.5235	16.2284	16.8571	16.8725	16.6749	16.1335	15.5877	16.4475	15.2738	17.0633	15.787	15.6839	16.4979	16.4926	15.8616	15.9734	14.8069	16.6358	15.0907	16.9525	16.001	16.0523	16.3294	15.7567	16.2053	16.5366	16.459	15.8896	15.573
RB1	14.88	14.1203	14.2423	13.3572	14.7006	13.3248	13.1686	13.5905	13.8095	14.3099	15.0033	14.3161	15.3752	14.0465	14.0034	14.197	14.0874	13.7779	13.6268	14.0585	13.6749	14.6506	13.5195	13.2939	13.9272	14.3425	14.6868	14.3822	14.2245	12.559	12.9532	14.0778	14.101	14.7269	13.7063	15.1525	14.5334	13.2513	14.687	13.8588	14.4935	13.1731	13.96	14.4827	14.6921	14.3465	13.358	13.987	14.3126
PTMA	15.5774	13.2332	13.1484	13.6614	13.1519	14.4808	14.0153	13.6807	14.1304	14.6746	14.805	14.38	12.7356	14.7036	14.8863	13.9241	14.2579	13.2066	14.2721	14.6313	14.2119	14.649	13.7109	14.5026	14.4645	13.7878	12.7087	14.4408	13.4778	14.2585	14.2135	14.8865	14.4564	13.275	13.6653	14.0443	14.7201	15.1631	13.7738	13.2168	12.2663	14.6584	13.8121	12.5297	12.2298	14.1958	13.4727	14.8137	15.2252
CDK1	10.9983	12.9599	13.1987	13.7057	13.1547	12.8894	10.5134	11.8034	11.7018	10.9946	11.2372	12.148	10.9132	11.4641	12.494	12.1111	10.5432	11.3746	11.4254	11.963	10.3402	11.2749	9.92692	10.3239	11.0249	12.1987	12.1051	11.0651	11.2233	12.2141	11.1392	12.5665	11.1938	11.6861	11.8498	11.9799	11.6881	9.34455	10.462	12.8746	11.9486	12.6862	11.4949	12.2002	11.5845	11.4894	11.8082	12.0049	11.8164
ATP5F1B	19.1369	18.8757	19.1118	18.6758	18.9846	19.2984	18.4587	18.8417	19.1523	19.2092	18.3423	19.6561	18.3154	18.226	18.7191	18.8407	19.0108	18.4719	19.3887	18.8725	19.7722	18.8263	19.0716	19.6073	19.1809	19.3836	19.2015	18.7552	19.5998	18.2731	18.9924	19.1491	19.2305	18.9434	19.4222	18.3109	19.9132	20.7424	18.6507	18.99	18.4878	19.1095	19.2885	19.041	19.0619	18.467	20.2508	19.566	18.3876
C2	14.3644	14.2568	13.5029	13.7561	14.273	13.6985	14.107	14.1218	14.5326	12.8265	13.7195	13.8482	13.9563	13.0851	13.3446	13.7232	14.2374	13.6877	13.1751	14.2464	14.0017	14.3338	13.4245	12.8754	13.6223	14.2944	13.6413	14.0538	13.1723	14.6979	14.474	13.6335	13.6535	13.1282	13.2858	13.7431	13.5515	14.052	11.6454	14.419	14.8053	13.2123	13.9368	14.0063	14.4561	15.0623	14.7498	13.6995	13.9783
S100A9	18.1434	19.2375	19.7026	18.3339	19.8525	18.2908	19.4037	20.17	19.5439	17.9657	19.5102	19.7584	18.382	19.3718	20.2382	18.7758	18.0526	18.6851	18.0867	19.3532	16.8139	18.7254	18.6417	17.5506	17.9789	17.9797	18.8709	17.5649	18.6764	20.5455	18.8193	19.8883	18.6914	19.4081	17.9996	18.4126	19.4332	16.5095	19.4011	20.8166	18.5356	18.3918	19.4186	18.5205	17.7609	20.2395	18.7903	18.8603	18.7311
S100A6	14.4334	14.6505	14.5624	13.0933	12.8006	13.6697	12.7342	13.7214	15.7142	12.4351	13.3772	13.1409	13.906	13.7435	13.7628	12.8842	13.4269	13.8448	13.9981	14.6501	13.7146	13.6511	14.3616	14.8542	12.7848	12.8742	15.3923	12.4224	13.8027	15.1337	13.6506	11.7005	14.697	14.1109	12.5605	14.0913	13.0272	14.7181	10.2656	13.4149	14.5914	12.496	14.253	14.656	14.6367	14.2407	15.7506	14.4481	14.0022
APOA4	14.5641	15.4079	15.1814	14.3126	15.08	14.4658	15.4194	15.1619	14.604	14.2768	13.6752	14.4148	14.2207	14.1424	14.6771	14.1834	13.7732	14.2171	14.3455	14.6388	13.4247	14.5138	14.4682	15.4762	14.642	13.7067	13.6906	14.564	13.4863	16.6556	15.6385	14.3738	13.9706	14.2588	14.2878	12.5211	14.3503	15.4665	12.8605	16.516	13.3308	14.4405	13.2935	13.9581	14.1171	15.879	14.3521	15.3966	14.0586
EIF4E	13.6859	14.7223	14.7509	13.5916	14.1763	14.0375	14.3432	14.034	14.6758	14.4624	14.2653	14.8277	11.6591	14.2354	14.5305	14.405	13.3098	14.6643	13.508	15.0379	14.2953	14.1401	14.0868	14.107	13.7679	14.2447	14.4902	13.8424	13.8896	13.5128	13.7223	14.1623	13.8708	14.3142	14.5158	13.943	14.3025	14.2825	14.1636	13.4358	12.5374	14.4064	14.5078	11.889	13.1242	13.9457	12.71	14.3345	14.7918
CEACAM5	16.6937	20.2636	18.6894	19.2249	16.2566	17.9356	17.238	15.568	18.0663	18.1661	19.4274	17.8548	18.04	19.3434	16.5045	16.2959	19.4255	18.1693	19.5817	18.286	17.9274	17.3634	19.0387	17.7631	18.8272	18.6571	17.1063	18.6413	17.4759	19.2825	18.5126	18.8193	18.6899	17.6433	20.4151	19.9727	20.2083	15.9865	19.4428	17.0148	17.535	19.3483	17.3294	18.0533	17.9961	18.6386	19.1867	17.641	18.9415
ENO1	17.897	16.9206	17.895	17.921	17.7914	17.4942	17.9731	17.6247	17.6084	17.675	16.9691	17.7282	17.8549	17.5332	17.7156	18.1794	17.3864	17.6402	17.4745	18.0557	17.4163	17.1955	17.5605	17.5069	17.3346	17.3488	17.4182	17.322	17.2751	17.7676	17.7267	17.1674	17.4116	17.3226	17.6546	17.5152	17.3526	17.8298	17.396	17.3957	18.0422	17.3739	17.6655	18.0662	17.72	17.7457	17.6282	17.5793	17.3731
PYGL	17.9988	17.1005	16.2366	18.3462	16.8345	16.7891	16.9338	17.514	17.1508	16.9302	16.9597	15.9124	16.9367	17.7425	17.1009	17.3975	17.8074	16.4945	18.3857	15.9691	16.2296	16.6972	17.7079	17.0199	16.8044	16.5361	18.663	17.5711	16.5999	17.324	17.1186	17.4691	16.0347	15.8506	17.0445	16.008	17.7638	16.2727	16.1029	17.7098	16.1118	16.3445	16.7109	17.637	16.7583	17.2372	17.2591	17.2059	17.0451
GPI	16.1528	16.5396	16.6598	16.6913	16.8249	16.5661	16.3926	16.7751	16.3951	16.9332	16.9442	16.4762	17.3669	16.4165	16.9431	16.4182	16.8191	16.6416	16.7464	16.605	16.6609	16.6805	16.5583	16.8177	16.4048	16.1648	16.6363	15.9839	16.6636	16.4373	16.7449	16.4244	16.2338	16.0802	16.5501	16.898	16.6446	16.9689	16.4978	16.534	17.2066	16.0846	16.7128	16.8294	17.3292	16.5883	16.704	16.7884	16.5278
NPM1	15.8803	14.9728	16.9047	16.179	16.0743	15.9854	16.0399	16.3057	17.1474	15.7094	16.0156	15.6951	16.7015	16.0148	16.3442	16.8761	16.4526	16.1464	15.7426	16.5002	16.1912	15.759	15.3978	15.724	15.9377	16.3522	15.9873	16.0805	16.1226	15.7266	16.8143	15.9952	15.9064	15.1994	16.3118	16.1943	16.1561	16.1199	17.2664	16.0244	16.6729	15.8059	16.2492	16.3951	16.76	15.8765	16.1308	16.1762	16.159
TPM3	17.795	17.6707	17.5715	18.1574	18.2545	18.2032	18.2945	18.1217	17.742	18.2509	18.0891	17.7691	18.7361	18.2933	18.5795	18.3194	18.829	18.2619	18.1952	17.7512	18.0922	18.1949	18.2034	18.1257	18.0626	17.8858	17.6455	18.4584	17.7609	18.3758	18.2629	17.7218	18.0917	17.8727	17.4916	18.0238	18.3429	17.7655	18.739	17.9904	18.7169	17.6429	17.7988	18.5983	18.0229	18.5971	17.5517	17.4658	17.7017
ITGAV	13.6751	14.6182	13.7235	13.9753	13.7992	13.7177	14.4763	14.4006	13.7253	14.1032	13.2416	14.1146	14.3207	13.6412	13.9192	14.243	13.9545	13.5526	14.4898	14.2694	13.9405	13.2287	14.0125	13.8634	13.9238	13.9458	14.2131	14.0496	14.1368	14.3809	14.2931	13.7236	14.6872	14.5021	13.9902	14.0721	13.4133	14.6439	15.4606	13.6393	14.8296	13.989	13.7926	14.3748	14.8566	14.6789	14.3605	13.6621	13.8469
HEXA	14.8093	13.8511	13.4384	13.7156	13.7877	14.3368	14.0054	13.8186	14.6695	13.6432	13.6397	13.9425	14.1578	13.4743	13.5236	14.2442	13.8985	13.8271	13.7242	14.5384	13.7412	14.0658	13.7909	14.3644	13.9211	14.2783	14.0748	13.5761	13.9226	14.7102	14.4596	14.8746	13.5087	12.7479	14.5205	14.6391	13.1262	13.5075	10.9729	13.624	14.4354	13.8727	13.9758	14.5856	14.4835	14.849	14.6528	13.1562	13.5694
SERPINE2	15.1848	12.8514	12.2556	13.1171	11.4757	13.6388	13.6525	13.7882	13.1725	13.1288	11.9681	13.3633	13.5273	13.1933	12.5867	11.5717	12.8092	12.3231	13.9078	12.6398	12.6752	11.7161	12.4727	13.3872	13.0437	12.9717	13.0061	13.8569	12.1246	11.3065	13.4772	11.5727	13.5723	14.469	12.5215	13.1948	13.0755	13.9299	7.64997	10.9469	14.0101	13.545	13.1323	12.099	13.2061	10.7769	13.7136	12.3837	11.9431
EPHX1	17.8342	16.7472	16.6378	15.065	16.6198	16.1754	16.5626	16.329	15.4352	17.9509	15.8905	16.0227	16.5153	15.9782	15.3005	16.5857	15.4693	14.9747	16.1018	15.5068	17.241	15.8884	15.6378	16.0798	15.9617	16.6291	17.0127	15.8602	16.4718	15.9925	16.4637	15.7193	15.8612	17.1466	15.5467	15.5929	16.3285	17.0597	16.7326	16.76	15.3136	16.0899	16.4919	15.6762	15.7175	16.4228	16.5097	17.3212	16.187
DBI	13.8875	15.0091	14.8569	14.1996	14.099	14.2756	13.9926	13.489	15.1134	14.7238	14.9822	15.124	13.9952	14.8554	15.0622	15.0519	16.0043	15.2605	15.3522	15.2596	13.6292	14.7319	14.9194	15.0202	14.6416	14.5278	15.5557	14.9798	15.3446	13.9518	13.7155	14.2713	14.394	14.7779	15.1527	14.6872	14.714	13.2359	11.3455	13.1764	14.4339	15.222	14.5814	14.783	15.6462	14.3581	15.285	16.0466	15.205
FABP1	14.0668	19.6279	15.2404	21.3738	16.2633	19.8331	15.0645	14.7436	18.0225	16.7615	18.7549	18.851	18.148	16.7906	16.2986	16.7953	19.6724	20.216	19.4538	20.0632	14.5535	17.4577	21.3887	20.5796	19.8697	17.2994	20.2428	19.2543	17.518	16.9371	17.192	17.0571	17.1576	15.124	20.9091	18.3608	18.7594	14.9939	17.5195	15.6329	19.7264	15.1793	18.1954	19.4053	19.6722	18.7025	17.1954	19.246	16.0764
LDHB	14.4795	16.5344	17.2244	17.4377	16.3285	16.4888	16.6025	17.4808	16.2037	16.9205	17.0938	16.6003	17.1829	17.8173	16.5045	18.2786	16.6359	18.0142	15.7714	16.3126	15.47	15.6462	15.8013	16.5026	16.9671	16.8375	17.0683	16.9128	16.516	17.0918	16.3477	16.1618	15.7851	15.9295	17.5073	17.4582	15.9147	16.2786	17.4411	17.3682	16.0687	16.7045	17.4423	16.829	16.8171	16.5873	15.8743	16.816	17.0037
CENPB	12.1759	12.7194	11.3187	11.1239	11.9858	12.5992	12.0026	11.2596	11.8465	12.1486	10.0198	12.6071	11.0187	12.7271	11.4291	11.7707	11.5709	11.0154	11.407	11.6735	12.1681	12.4377	11.5963	12.5504	12.5276	12.0563	11.8822	11.9435	11.317	10.5724	11.001	10.2212	11.7304	11.021	11.6605	11.1344	12.6859	11.1031	10.6896	12.1737	10.6739	13.0837	12.1071	11.3406	11.7191	11.1155	11.967	13.4879	11.4505
GPX1	14.0876	14.0193	13.446	13.0617	13.5131	13.9952	13.9242	14.5387	14.3574	14.3216	13.5913	13.7479	13.7035	14.0867	13.0738	13.0143	14.6034	13.6951	14.6919	14.2926	13.6742	14.2794	13.6176	14.0157	13.7505	13.9037	14.2173	14.1609	13.7739	14.6714	13.6523	13.7271	13.9627	13.9107	14.2587	14.2426	12.8869	15.169	15.4312	13.88	11.3724	13.7539	13.3969	14.035	13.9142	14.2937	14.2308	13.8308	13.1771
PGK2	15.1735	14.9696	14.8052	14.4642	14.401	14.9471	14.7041	14.8867	14.4652	14.518	14.4655	15.0569	15.033	14.2526	14.2651	14.962	14.9043	14.5517	15.1505	15.2722	14.2269	14.5996	14.1418	14.1463	14.262	13.8592	15.1016	14.3353	14.0846	14.7008	15.46	14.1277	14.2997	13.9101	14.5737	14.4297	14.4083	14.8067	13.3836	14.5166	14.9251	14.4684	15.0284	14.3947	14.7145	14.558	15.553	14.7833	14.6068
PROS1	14.8813	15.3044	14.9374	12.7766	16.1692	14.5311	14.7416	15.5904	14.9759	13.0179	14.9509	15.2478	14.2739	15.9023	15.6056	14.9028	13.5886	13.1473	14.4995	15.2646	12.4646	15.8574	15.8231	15.1079	13.9488	15.5314	14.8343	14.8716	13.6931	13.8887	16.3564	15.2169	15.6745	15.4952	14.9398	15.1182	15.1042	16.1703	10.0338	16.1542	15.6214	14.7645	14.4418	13.3619	14.3333	15.1089	14.6099	13.9947	14.9308
P4HB	17.8733	17.0557	17.4899	17.5663	17.4486	17.5784	17.4642	17.1005	17.5373	17.8308	17.5994	17.8886	17.3229	17.2569	18.2743	17.3037	17.6512	17.7119	17.2085	17.7533	17.3449	17.3918	17.2781	17.5659	17.2382	17.6813	17.682	16.9423	17.2732	17.7858	17.7381	17.4279	17.4537	17.0332	17.2542	17.5294	17.4632	17.1308	17.196	18.0018	18.0321	17.2503	18.1715	17.7113	17.6296	17.7063	17.6299	17.7474	17.1051
H1-0	17.4292	17.1139	14.7434	15.8553	15.9708	16.1948	16.1576	16.695	15.9208	15.3786	15.1041	16.188	16.9019	15.5612	15.5264	16.0167	16.9963	15.6438	16.9986	15.1494	16.5288	14.2213	14.9717	16.0268	16.0914	14.7233	14.97	16.7919	15.8295	15.8407	15.5294	15.5632	17.3824	15.4663	14.5943	15.6818	14.2974	17.4635	18.4836	15.2678	15.9945	17.5138	15.1403	15.7817	16.344	17.0115	16.1102	15.9541	15.536
CTSD	18.1972	17.268	17.0643	17.1975	16.374	17.0165	17.0938	16.6271	17.0599	16.5868	16.8178	17.3769	16.6	16.9576	17.3714	17.2756	17.3612	17.0634	17.2931	17.2121	16.6086	16.9716	16.6805	17.0937	17.108	16.973	17.439	17.093	16.8262	17.1012	17.449	17.477	17.0725	17.5873	17.1065	17.7556	16.416	17.8311	16.433	17.1418	16.9845	16.4538	17.2258	17.0077	16.6123	17.0181	18.4568	17.113	17.0217
ANXA2	17.5507	16.2426	16.4507	17.086	16.5337	17.7319	17.401	17.5618	16.638	16.8952	16.7059	16.5368	17.8369	17.1828	17.1235	17.3557	17.3055	16.9264	17.0087	17.9246	16.7507	16.8291	16.5434	16.955	16.8735	16.3244	16.9614	16.6888	17.232	16.7012	17.2283	16.3143	17.7978	17.4356	16.8338	17.625	17.0291	17.7546	16.9613	15.9724	18.0254	15.4804	16.165	17.0774	17.8972	17.5507	17.0655	16.2432	17.1307
C8A	12.6494	14.0507	12.32	12.4355	16.4952	12.1278	13.5394	15.3242	12.8217	10.9409	11.3527	12.3122	11.1653	10.9754	13.0313	12.4292	10.6893	12.765	12.4004	13.2564	10.8571	12.8242	13.0935	9.80482	11.8693	11.498	12.8865	12.3847	12.495	15.426	14.166	11.0972	11.9182	11.5869	11.5284	4.80435	11.5976	14.1838	12.3143	16.6139	13.306	11.7213	12.2116	10.8764	12.3934	15.4979	12.6759	12.0984	12.087
C8B	13.4864	12.1095	13.22	13.5417	15.6318	13.9529	14.2646	14.6119	13.8016	14.2675	13.9399	13.7209	14.8755	13.7603	13.4989	12.7151	12.7037	13.4256	13.3571	13.9751	13.6139	13.9187	12.6865	12.8427	13.5825	13.64	13.4441	13.8023	13.941	15.1694	14.1468	13.7644	13.6238	13.5211	13.7726	13.5829	13.6413	13.363	10.6901	16.0766	14.2429	13.7283	13.4992	13.2092	13.9657	15.0409	13.6608	12.7579	13.3367
C8G	11.992	16.3513	12.2249	12.3842	16.67	13.7492	14.5281	14.9715	13.914	13.9042	14.0038	13.2297	11.6862	13.7377	13.9572	13.273	13.9069	14.0394	13.6916	13.6781	11.6893	14.3931	13.5409	12.9864	13.1723	13.9289	13.2755	13.6936	14.2686	16.2952	13.8789	14.0399	12.444	13.5092	13.7623	12.5274	13.0714	14.3336	8.32618	16.4869	14.1226	13.1335	11.7821	14.7361	14.852	15.556	15.3254	12.1247	13.7065
CAPN1	17.3346	17.445	17.0517	16.8934	16.4242	17.0593	17.179	17.0617	15.5677	17.1607	17.0088	16.3917	16.6488	16.9141	16.4908	16.8403	16.8674	16.7929	16.614	16.8409	16.7889	16.8988	16.7393	16.9013	16.9655	16.9058	17.0132	16.9002	17.0167	16.4822	17.004	16.6882	17.0875	17.4194	16.807	17.2924	16.7159	17.0748	16.8958	16.2651	16.5312	16.4086	16.5162	16.7685	16.0759	16.8452	16.6301	16.946	16.8935
TUBB	17.575	17.6957	18.2993	18.3407	18.2066	18.2131	18.3789	18.3361	18.2984	18.297	18.3722	17.5123	18.6671	18.6535	18.5163	18.0156	18.479	18.1476	18.2111	18.1295	18.3364	18.5054	18.2854	18.2442	18.3234	18.3832	17.8067	18.5317	18.4434	18.3917	18.3453	17.4423	17.6953	18.0358	18.3115	18.7009	17.628	17.6773	18.1582	18.5603	18.5334	17.5263	18.0455	18.818	17.9117	18.3571	17.781	17.4938	18.157
DCN	17.8564	19.8628	17.5975	16.9046	17.5934	17.9973	18.3818	19.1233	16.3374	18.4019	15.5219	16.9723	16.7423	16.4158	17.2073	16.8809	16.952	16.7584	18.4108	17.7641	18.1031	17.4791	17.2271	18.4051	18.4432	17.2968	16.3202	18.7459	17.9905	18.4789	18.9849	17.8575	17.7496	17.5189	17.5821	17.8682	17.0892	19.3745	18.4752	18.3922	16.3356	18.9606	17.1245	16.8089	17.2584	18.0604	17.7195	17.5004	17.5955
PSAP	15.87	16.5279	15.1583	14.8433	15.1585	15.0502	15.2686	15.0553	15.9108	15.205	14.6931	16.2322	14.6581	14.6784	14.8543	15.6237	16.2043	14.6443	14.9109	15.7295	14.8794	15.1448	14.6307	14.6304	14.9761	15.0942	15.6417	14.6435	14.7417	15.1666	15.1665	15.5233	15.043	15.1474	14.6325	15.6606	15.0772	15.5507	15.0031	15.7014	15.5268	15.8656	15.4031	14.697	14.8743	16.1783	15.9234	15.1421	15.7812
HEXB	16.6445	15.7588	15.3494	15.8909	15.7654	16.1654	15.5258	15.4933	16.4722	15.4138	15.4255	15.1577	15.7263	15.1214	15.6474	16.2393	16.3364	16.0569	15.8883	16.2428	15.6345	15.5422	15.9708	15.8628	15.7037	16.2593	16.2513	16.1984	15.4605	16.2961	15.9907	15.7778	15.6774	15.3672	16.0728	16.3648	15.7702	14.979	14.6415	15.3843	16.2881	15.8179	15.4962	16.179	16.1697	15.9624	16.2137	15.8235	15.1994
PFN1	18.5182	18.467	19.3298	19.0679	19.122	19.3982	19.222	19.6779	19.0747	19.1516	19.0652	19.4083	20.2451	18.8023	19.265	19.3287	19.9621	19.0485	19.0583	19.1711	19.1601	18.8984	18.887	19.1093	19.1238	19.2005	20.1196	19.2031	19.2517	19.5076	19.105	19.2323	19.3975	18.9627	18.991	19.5188	19.1044	19.4841	18.5954	19.5101	20.0976	19.3056	19.3709	19.8782	19.8248	19.6381	18.8977	18.9839	19.0843
BPGM	13.2192	12.4949	14.637	14.0971	14.2625	13.3865	14.1602	13.7483	14.7044	13.1588	14.2501	14.0896	13.1667	13.6858	15.1142	14.1452	12.5599	14.407	13.5633	13.8021	12.6998	14.9052	14.0675	14.1037	13.1343	13.7118	14.4726	12.5903	13.4088	15.0266	13.5183	13.8461	13.8037	12.6851	12.4868	12.78	13.6791	13.5429	11.3334	13.3888	12.5446	14.2038	13.9855	12.7698	12.6155	15.0497	14.0583	13.5677	14.1897
APRT	17.9134	16.4507	15.9443	16.9896	17.0172	16.8435	16.4492	16.7184	17.673	16.45	17.1002	16.7369	16.8922	16.6732	16.3513	16.7324	17.3971	16.8966	17.0407	16.6621	16.4192	16.8617	17.1882	16.8956	16.5877	17.5218	17.1503	16.8351	16.5651	16.6882	16.6665	16.1944	16.4069	16.3098	16.7809	16.8481	17.2857	16.1725	16.7403	17.0755	17.0647	17.1635	16.2084	17.0921	16.4994	16.4875	16.5148	17.486	16.3822
EPRS1	15.5388	15.0613	14.9667	15.1058	14.8423	14.7747	15.0355	14.9585	15.0462	15.7948	15.4229	14.9297	15.2974	15.3922	15.625	15.0222	15.2973	15.7713	15.2042	15.0787	15.666	15.4513	15.6303	15.1728	14.9308	15.1618	15.0476	14.8944	14.9304	14.9186	14.9753	14.8333	14.7943	15.175	15.1131	15.4049	15.5211	14.5179	14.7101	14.9992	15.2456	15.0566	15.4106	15.1197	15.0809	14.739	15.2372	15.612	15.1873
CTSB	14.1935	14.9779	13.8335	14.1918	13.6405	14.2545	14.3096	14.0617	13.3958	13.4484	13.5448	14.7307	13.0825	14.1336	14.4059	13.6238	13.4762	13.763	14.1267	14.2707	13.3178	13.2872	13.8011	13.7639	13.5555	13.6765	14.7692	13.4589	13.9931	13.8716	13.7606	13.6821	13.8071	14.3372	13.0598	14.3164	12.5931	14.4004	13.4907	13.9225	14.9614	14.2068	14.3667	14.2089	14.6969	15.557	13.8194	14.5454	13.8095
HSP90AA1	17.9486	17.4309	18.0937	17.8604	18.0605	18.0826	18.1572	18.1287	17.6353	18.2955	18.0975	17.7595	18.3341	18.864	17.5057	18.1324	17.2942	17.6413	17.4762	17.8079	18.7401	18.1525	18.0416	17.784	17.8405	18.4725	17.7444	18.2376	17.4226	17.6885	17.84	18.3021	17.5119	17.324	17.6828	17.8513	18.2099	18.1622	19.0873	17.4042	17.8399	18.3126	18.0907	17.6907	18.4767	16.9287	17.5784	18.134	17.6756
HNRNPC	16.6348	16.8619	17.5595	17.2241	17.3999	17.2805	17.072	17.1211	17.7123	17.2295	17.1383	17.3564	17.6059	17.4069	17.4176	17.5204	17.3293	17.3814	16.8475	17.3763	17.6064	17.1409	16.9963	17.2104	17.0463	17.3635	17.3719	17.532	17.3619	16.954	17.0592	17.3886	17.4054	16.9034	17.1813	17.0157	17.2529	17.1714	18.6837	17.309	18.4348	17.8292	17.3443	17.4957	18.2861	17.1798	16.7998	16.9949	17.5636
UQCRH	13.6999	13.8407	12.9295	14.3499	14.3043	13.7137	14.0201	13.3679	14.1295	13.7285	13.6794	14.3792	14.2906	13.7449	13.5284	13.6557	12.8781	14.0425	13.706	14.2919	13.7372	13.586	14.0157	13.6846	13.7811	13.9215	13.7021	13.7733	12.7427	13.3554	13.3206	13.5486	13.6372	12.5314	12.0174	11.1873	14.1442	14.143	15.1802	13.1973	14.9801	14.3653	13.0554	13.9099	13.6967	13.3959	15.3878	12.3501	13.2046
LAMB1	15.9955	15.3108	15.44	15.433	16.4477	15.4718	16.4951	16.4463	15.3816	15.7358	14.9911	15.7298	15.389	15.5292	16.0999	15.7486	15.8331	15.2221	15.8174	15.8546	14.9592	15.4463	14.4074	14.5215	15.5153	15.7939	15.3359	15.9692	16.0271	16.9981	16.1445	15.6991	16.2361	15.726	15.7754	15.4792	15.8467	16.5318	14.4829	15.7279	15.9378	16.4268	15.9389	15.9285	15.885	16.6606	16.51	15.4815	15.7374
YES1	13.2796	14.1472	13.2235	12.4415	13.3864	13.9127	13.6606	12.128	13.6972	12.717	13.4418	13.6134	12.8199	13.5044	13.5448	13.7793	12.476	13.6009	11.6619	13.2349	13.4105	13.995	13.8175	13.9838	13.7495	12.7695	13.5456	13.2153	12.6456	12.6215	12.8047	13.1344	12.7583	13.0313	14.3326	12.2125	12.9204	12.0174	12.8843	13.1012	11.5948	11.7204	13.6552	13.0646	12.7413	12.6588	12.5931	14.1755	12.752
LYN	12.9933	14.4725	14.2472	13.4646	14.6669	13.9279	14.1885	14.4397	13.8357	13.5089	13.904	14.1651	14.935	13.8037	13.9922	14.4836	14.5137	14.7846	13.9888	14.9433	13.6106	14.0197	13.8527	13.9599	13.7867	13.7777	13.8762	13.5631	13.4306	14.4947	13.551	14.4171	13.801	13.7258	13.9053	13.9208	13.3926	13.3225	15.5045	14.9179	14.6526	13.6129	13.9494	14.2527	14.2301	14.6876	13.87	13.3887	13.378
TPM2	18.3744	19.0635	18.7727	18.6531	18.7531	18.865	19.1543	19.617	18.1726	19.1714	18.4271	18.1457	17.7041	19.0366	19.1135	18.2442	17.4129	18.6413	19.4148	18.8466	18.8861	18.7727	19.2151	19.0397	18.9206	18.7627	18.103	19.8462	18.8021	19.2371	19.3556	19.0824	19.5964	19.3818	19.2493	17.9002	18.5292	20.7886	17.5807	18.5609	18.6003	19.4434	18.481	18.0998	18.8434	19.0989	18.5072	18.1736	18.478
FH	14.2617	14.2124	15.2127	15.4346	14.8016	15.2975	14.7279	14.8729	15.2455	15.5159	15.2195	15.2258	15.2512	15.171	15.5895	14.762	15.3171	15.9594	15.5711	15.0968	15.2732	14.3337	15.2696	15.3336	14.8239	14.6892	15.3831	14.7799	15.2097	15.0572	15.0656	14.7801	15.1	14.6787	15.3343	15.042	15.911	15.5446	15.2993	14.2792	15.663	14.9008	14.8656	15.6378	15.0282	15.5477	15.5889	15.0682	14.6567
THBS1	17.5855	15.6265	15.9376	15.3612	17.6487	15.439	17.1462	17.9763	14.937	15.631	15.0176	16.0141	15.4634	16.2781	16.7644	17.56	16.538	16.059	18.3829	15.9914	15.4207	15.7926	15.8669	14.7433	16.2642	16.2117	15.5929	16.7713	16.4586	18.4489	17.7985	16.2859	17.2031	17.1261	15.8902	17.2251	15.2354	15.9189	15.4008	17.4649	16.5508	16.7292	15.9136	15.854	17.5927	18.3865	18.1552	15.1454	16.8657
SP1	10.8658	10.1608	11.985	10.1822	12.2207	11.377	11.5562	11.3629	11.5231	11.9557	11.3351	11.8039	11.1728	11.2318	11.5387	10.421	11.1492	12.6903	10.787	11.1438	10.9712	11.8571	11.6221	11.4534	11.5712	10.9294	11.0701	12.0725	11.9161	10.6463	11.4219	11.1592	11.1513	11.4284	11.2902	10.7858	10.8686	11.0683	7.1231	11.1998	10.8583	11.0499	9.18145	6.57717	11.446	10.9087	10.4781	10.8605	11.4923
COL1A2	17.2116	20.8212	16.6504	16.4479	16.8205	17.4272	18.1024	18.0356	15.5155	17.2057	15.8852	16.8446	15.2783	16.7283	17.1523	14.8609	13.6385	16.4989	17.071	16.719	17.6346	16.8545	16.8964	17.6394	17.5947	16.7598	14.8455	17.9604	15.5408	17.7543	18.2605	17.3361	16.986	17.6936	17.0253	16.1119	15.952	18.1199	15.5434	17.9249	14.2264	19.4093	17.0391	14.9525	16.3366	17.0806	18.3508	16.3988	16.8393
ANXA6	18.1352	17.2962	17.7818	17.2156	17.8842	17.3533	17.8942	18.3316	17.8619	17.6595	16.7817	17.5291	17.0799	17.4386	17.5518	17.3419	18.0603	17.4483	18.3976	17.8867	17.8646	17.737	17.6393	17.7173	17.9717	17.9117	17.1418	18.0593	17.7847	18.1384	18.0685	17.5872	18.3231	18.0794	17.7946	17.6911	16.9639	19.127	16.2072	18.2048	16.63	17.7958	18.0212	17.6998	17.164	18.0533	19.3988	17.1157	17.674
RHOC	15.1714	16.2978	15.0137	16.028	15.5805	16.0075	16.1576	15.858	14.8929	15.9718	15.5864	15.7013	15.9384	15.8115	15.9038	15.1685	15.0303	15.6833	15.6876	16.4836	15.1762	15.7361	15.9801	15.8735	15.5647	15.5327	16.5857	15.5831	15.2769	16.122	15.6017	14.5646	16.0409	15.5743	15.1938	15.6058	15.7814	14.839	12.9957	14.7584	15.2294	15.5941	15.2851	16.0801	16.4996	16.1835	15.6264	14.4692	14.8741
CD55	15.7125	17.6315	15.3954	14.8096	14.665	15.2694	16.4222	15.3656	16.1335	14.9496	14.228	15.0497	14.4623	13.8319	14.8878	14.3679	14.3278	14.6832	15.6182	14.9169	15.7281	14.0613	15.2915	13.5416	14.7768	13.9718	15.3238	15.1871	14.5005	16.9354	13.7035	16.4848	16.5035	15.8443	15.2548	15.444	14.0629	15.1528	14.334	14.7108	13.884	15.878	13.3479	14.5166	14.3476	17.1194	15.8079	14.4542	14.1091
ABCB1	13.2914	13.354	11.8802	14.6591	11.0789	14.0669	9.8235	11.5933	10.8081	13.1799	10.963	12.9846	11.5981	11.169	12.1455	12.6613	11.1265	13.0224	11.3054	12.2438	12.8221	13.7791	10.9998	12.711	12.7547	13.2271	11.6605	13.2466	11.2385	11.2906	11.6962	12.5627	14.2921	12.6018	12.1578	12.6064	10.7969	11.1436	16.758	11.6517	10.6869	13.9092	13.2127	15.4418	11.7241	11.5494	12.2511	12.0155	11.551
SLC3A2	16.1265	15.4489	15.7722	15.3608	15.4209	14.5675	16.0131	15.7985	15.2165	15.5794	15.6451	16.4017	15.8932	15.0846	15.8877	16.0197	15.0746	14.9259	14.6309	15.951	14.4742	16.0672	14.893	14.5288	15.2972	16.8555	15.274	15.5769	15.7292	15.0064	14.9937	15.1909	14.9038	15.2866	15.5384	15.5938	16.3869	16.9311	17.1889	15.1567	15.8865	15.2652	14.7872	14.513	15.3915	15.4233	15.5879	15.3102	15.3752
GUSB	15.9999	14.4239	14.0027	12.7889	14.9104	15.1949	14.7325	13.3633	14.668	15.2481	14.2805	13.4149	14.9013	11.8964	13.0131	13.6313	15.3258	12.1445	15.072	14.8495	18.4005	15.4842	13.969	15.3479	14.7114	14.0427	13.7583	14.6975	14.0527	13.8675	16.6921	13.9033	14.3233	12.8599	16.3727	15.1794	14.2456	13.9903	10.2286	14.0948	13.2384	14.7932	14.0944	14.5592	13.5855	16.2752	15.173	15.0951	12.4864
PFKM	14.5342	14.2744	15.9274	14.9851	14.6905	14.5469	15.5706	15.4171	14.7072	15.6739	15.2249	15.6851	14.7708	15.6117	15.0355	14.9499	14.3794	16.2281	14.8198	14.6546	15.1803	14.0654	14.1672	14.8234	15.0291	15.3223	15.1856	15.1272	15.1491	15.9484	14.4818	14.5164	14.8557	14.7731	15.9117	14.9724	15.1531	15.4006	16.0303	15.8525	14.8222	15.6158	15.2646	15.3615	14.5587	14.7566	14.3022	15.2446	15.3075
HSP90AB1	20.4447	20.2711	20.3643	20.6221	20.658	20.2716	20.5771	20.3076	20.0128	20.6103	20.7006	19.466	19.3294	21.029	20.453	19.5821	19.1467	20.7598	20.0877	20.0159	20.6816	20.4577	20.2337	20.231	20.5017	20.8413	20.595	20.5829	20.2978	20.2133	20.2512	20.6447	20.4075	20.6273	20.7782	21.4218	20.6837	20.3217	22.4363	20.7504	19.5489	20.3351	20.567	19.8295	19.6075	20.393	19.7193	20.7282	20.613
SRPRA	14.7261	14.3516	14.718	14.5046	14.6342	14.9282	14.3172	14.6333	14.806	15.0399	14.5742	14.5783	15.2412	14.3526	14.0855	14.8733	14.6858	15.1278	14.4305	14.5005	14.632	14.1484	14.1997	14.3629	14.4364	14.6919	14.1428	14.6918	14.6091	14.0334	14.4055	13.9972	14.792	14.7885	14.3612	15.1285	14.6859	14.4245	14.0836	14.2205	14.7919	13.9553	14.7945	14.6383	14.3787	14.9379	14.4669	14.9276	15.0142
ASNS	11.5823	12.6464	13.2663	12.7457	12.7899	12.5082	13.3973	12.6918	13.1082	13.9434	12.9442	13.3754	13.4254	12.5778	12.6325	13.2487	12.4656	12.7203	11.7929	12.1819	12.5886	13.3266	12.5085	12.5008	12.5567	13.426	12.4034	12.709	13.0023	13.7813	12.9408	13.3056	13.1816	12.5427	12.5382	12.9803	13.2877	12.954	15.7756	13.4638	13.1277	12.8856	13.6291	13.405	12.456	12.5316	13.0518	12.1699	12.62
ELANE	12.9823	14.3547	15.4068	14.8001	16.1121	14.2725	16.1356	16.5117	15.7727	13.509	15.5865	16.4632	16.8874	16.047	16.8612	13.5322	14.3799	15.1328	13.2606	16.0254	12.2504	14.6991	14.6102	13.4485	13.7142	14.167	14.0457	13.1408	13.8339	17.4806	13.8008	15.3685	14.5844	15.2273	12.8267	14.3493	14.6056	11.5343	14.7317	17.4504	16.815	13.9821	14.8243	14.6311	14.6692	17.5963	14.2263	13.6536	14.2731
SOD3	12.9593	14.5896	13.2702	14.5454	15.2219	13.341	12.686	13.7668	13.7309	12.6023	13.2906	12.9442	12.2498	13.0241	12.6587	11.9856	14.3266	13.157	14.4955	12.3505	13.0048	13.6363	13.0549	15.1869	13.5077	13.3169	14.0476	13.2968	13.1526	13.2383	13.8724	15.6658	12.8637	12.1867	14.5258	11.6791	11.7704	16.6905	7.29279	11.0419	14.045	13.3012	12.5702	13.2843	12.5967	14.1548	12.3249	11.1866	11.7558
CTSG	14.7075	17.2869	18.117	16.3235	19.0749	16.4998	18.1874	19.3751	17.255	15.6859	18.0573	18.3495	18.0249	17.9361	19.2752	16.3382	16.2981	16.8126	15.6426	17.9477	13.1626	16.9558	16.4143	16.0086	17.1373	16.3461	16.3473	16.7137	17.0224	19.4769	17.3969	18.4712	16.3464	17.5607	13.9958	16.8709	16.8538	13.5698	15.9252	20.2085	18.079	16.5981	17.4869	16.4178	15.9296	19.1495	16.6896	16.3728	16.497
HMBS	13.9428	11.2278	12.1206	12.0393	12.9454	10.294	13.2701	11.5862	12.5726	11.8659	12.6488	12.736	13.2642	12.1663	12.5264	13.0981	12.5949	11.0951	12.8396	12.0773	12.2822	11.0494	11.2252	11.6317	11.9915	12.6787	12.7629	12.3416	11.3244	13.604	13.0166	13.0677	12.6244	11.6812	11.7818	12.3087	12.2236	12.5209	10.8059	10.2221	12.605	12.0454	12.3547	12.6597	12.0499	12.8721	12.5167	11.493	11.3334
MME	15.3258	11.934	13.953	14.7374	13.6674	13.59	12.2027	13.6859	13.4238	12.6059	13.1354	13.6085	14.7	17.1714	14.5413	14.0673	12.9265	12.3641	11.3461	15.9797	10.9922	12.8495	13.3003	11.3103	12.0773	13.4807	13.4869	12.7795	11.8117	13.6722	12.2367	14.3372	14.2509	13.6195	10.7356	13.0018	13.1235	12.2389	16.7923	14.5871	12.9861	12.963	13.3556	12.4009	12.8722	14.572	15.1243	12.6771	12.4184
ITGA2B	10.5203	12.0054	13.0644	12.4657	16.2747	10.1321	13.1537	12.3466	12.2488	11.9999	11.6906	12.1973	12.6272	13.3448	14.0165	13.6342	12.8182	13.07	10.9152	12.0574	10.7522	12.7098	13.0535	10.7712	11.1346	12.3199	14.4682	12.1558	12.6395	14.388	12.536	13.1077	12.8585	14.0411	10.3962	12.9954	13.268	10.9706	13.8821	14.4703	13.2649	14.1074	13.407	11.5495	11.6944	15.3334	14.0239	12.1784	12.6022
PDHA1	15.0055	15.0008	15.9221	16.0961	15.3249	16.1191	15.3224	15.4905	15.5779	16.5433	16.2161	15.5729	15.4475	15.9507	15.5828	16.2772	16.0778	16.2007	15.8243	15.7856	16.2524	15.6576	16.1928	15.9007	16.0099	15.7391	15.6014	16.4069	15.9855	15.1151	16.005	16.2553	16.1903	16.2406	16.8755	15.5895	16.2795	17.0551	15.9472	15.4621	15.7063	15.9257	15.4255	15.6404	15.9348	15.6653	16.2327	15.5364	15.6607
PLEK	12.1932	13.2847	13.1086	9.75464	13.3666	12.9471	13.5576	14.3789	13.014	11.3262	13.157	13.4033	12.3947	12.6692	14.1684	14.4177	13.9427	13.2961	12.017	12.5482	11.6723	13.496	12.9622	13.8476	12.389	12.6308	15.2402	12.578	12.1715	15.1331	10.7625	13.5215	11.726	13.3932	13.2988	13.2627	12.0314	12.7105	10.8926	15.0942	12.7048	13.8355	12.5746	14.4056	12.0467	15.8318	12.9495	13.384	12.8132
CD14	13.1997	12.8895	12.0515	12.7573	12.0464	12.3714	12.9099	13.6461	12.283	11.9784	12.2264	13.288	13.2668	11.5401	12.9412	12.5088	12.3788	11.7839	12.8641	11.6136	12.7212	12.8791	12.4848	12.7477	12.7589	12.4769	12.4462	12.65	12.4546	13.0318	12.7024	11.678	13.107	12.4932	13.1907	12.2406	12.5336	13.1925	14.307	12.7004	12.0969	13.0622	12.2407	11.7828	12.891	14.3531	13.0722	11.876	12.5356
COL4A2	18.7481	19.2241	17.9017	17.4273	18.2571	17.6007	17.9884	18.5358	16.5393	17.8745	16.7081	17.6231	17.0816	17.4534	17.9147	16.8396	17.2513	17.4048	17.7004	17.4433	17.735	17.6825	18.2181	17.7937	17.8774	17.3911	17.1564	18.4659	17.2539	18.6034	18.0057	17.8061	17.4465	18.3452	17.8943	18.1914	17.4802	19.427	16.6436	17.8816	17.6146	17.9499	17.9793	17.0298	16.7901	18.1077	18.9929	17.6844	17.5332
CYC1	13.5577	14.1293	14.6919	13.2733	14.0392	13.8714	13.6656	13.4553	14.0425	15.0348	13.845	13.487	13.7202	14.0678	13.1635	14.9681	15.6764	14.2916	14.0944	14.2432	14.5048	13.3644	15.3735	14.6675	14.0003	14.0225	14.2605	14.2744	13.6352	13.9623	14.969	14.7671	14.2365	13.5919	13.772	14.871	14.8899	16.4435	14.5881	15.514	13.6394	13.9921	14.6009	14.0255	13.0058	12.9912	15.4155	14.8782	14.6252
PTPRC	14.8193	15.3709	14.7429	14.9221	14.873	14.7414	14.5529	15.3423	14.8054	14.5969	14.3197	15.6319	15.1647	14.3395	14.4887	14.8319	14.9001	14.3484	14.4874	14.2895	14.808	14.8617	15.2697	14.8168	14.4778	15.295	14.9779	14.9742	14.676	15.0312	15.3576	15.3612	14.6437	14.5526	14.4575	14.6986	14.1146	12.9494	15.8637	16.0612	14.8893	15.347	15.0646	14.1948	14.3232	15.5003	14.1703	14.8331	14.2887
MET	13.0309	13.1073	13.2466	13.3772	12.5808	13.136	13.8441	14.0422	12.4246	13.3406	12.6555	12.5954	12.9339	10.6055	11.8477	11.2953	12.6801	12.8794	13.4371	12.4357	13.5008	12.0654	12.6216	13.4416	12.3351	12.9913	13.4509	13.6397	12.6843	11.9291	13.2853	12.44	13.6606	12.7613	13.1426	13.1644	14.1987	12.3643	14.9581	13.0481	12.7962	13.1257	13.2753	12.2182	13.8998	12.285	11.9153	13.4772	13.3085
MYL3	14.1292	16.1369	15.1073	15.8022	14.3961	14.148	14.9558	13.9096	13.3953	14.8721	13.0623	14.0266	13.1914	15.5449	14.5461	14.066	14.2711	15.7889	14.9364	15.0541	15.9069	15.465	15.9228	15.6565	15.5098	14.2074	13.638	15.5506	12.9226	15.914	15.8218	15.7868	13.8864	14.1138	15.0444	13.9368	14.0167	13.8054	13.7621	15.4438	14.6222	15.9632	14.752	14.4982	14.7371	13.8803	16.0967	13.9909	14.0553
CFH	13.7387	14.4748	14.08	14.1236	15.0503	13.5698	14.7847	14.7753	14.5182	13.43	12.3678	14.0151	13.942	15.4996	15.4699	13.4127	12.987	12.914	15.1751	14.4646	17.3065	14.3682	14.0776	11.4763	15.8455	13.0103	13.715	13.3045	14.4243	14.7381	16.5235	15.8801	15.5704	13.8304	13.485	15.4665	14.9187	15.0437	14.8338	15.309	14.761	14.1659	13.0652	13.3934	13.9675	17.1008	13.7956	13.4592	13.865
SNRNP70	14.7874	14.9502	14.6135	14.3593	15.0042	14.161	14.1838	14.7347	14.052	14.1913	15.1224	14.3518	14.1251	14.8276	14.7528	14.4512	13.0519	14.335	14.1016	14.0351	14.9207	14.7499	14.4226	14.7999	14.9424	14.9162	14.3011	14.8855	14.2033	14.3405	14.9338	14.7506	14.6184	14.698	14.7137	14.6461	14.8717	15.3106	16.9069	14.994	13.9916	15.0756	14.6577	14.5992	14.691	14.8462	13.9507	15.1297	14.5605
HCK	12.5303	13.819	12.0273	10.1077	13.8834	12.2636	12.7083	14.4327	11.7794	12.0238	11.6772	12.9336	13.1628	12.0751	13.5321	12.3065	12.9749	11.7209	13.1921	13.082	11.7362	12.4795	12.0937	12.7235	12.1312	12.0841	11.8538	12.4812	11.5236	14.9061	12.8757	13.0864	12.8395	12.6374	11.5064	13.5099	11.5528	12.1957	12.217	14.9614	13.3882	12.3272	12.5217	11.5724	11.4487	14.8821	12.893	12.1283	11.9367
FCGR3A	13.0156	12.4446	13.4875	13.4013	12.7411	12.326	13.9372	15.0202	12.4869	11.5495	12.444	12.6015	14.7121	13.1192	14.6099	12.6259	12.4201	13.0486	13.5128	12.5612	12.3974	13.3286	12.6043	12.7784	11.8546	12.7569	12.3259	12.9252	13.1459	16.4495	13.4483	12.8026	13.8345	12.6089	11.2089	13.7011	10.636	12.884	14.0966	14.5564	14.1608	13.7306	13.3562	13.9078	13.4288	15.6934	12.7882	12.7052	11.9941
ITGA5	13.1284	14.8126	13.229	13.2397	14.7149	13.7599	14.5868	16.1195	12.9372	12.9817	12.7781	14.0071	12.6504	13.5125	14.0123	13.3833	13.8162	12.528	14.2157	13.9405	12.8446	11.9523	12.1784	12.4965	13.4307	13.417	13.5642	14.6214	13.3249	15.2534	14.9233	13.6435	14.5418	14.728	13.2611	13.3818	13.275	16.1317	10.1109	15.121	14.4788	14.7618	13.1334	13.1008	13.7659	14.6147	13.4624	12.2726	13.4805
NFIC	11.5983	12.7287	11.9576	6.24264	11.605	12.0059	11.518	11.9985	11.1454	11.3259	11.9055	12.6218	13.4064	11.7562	12.3697	11.8726	11.7453	11.4999	11.3086	11.4227	11.8207	11.4139	11.3414	11.9688	12.048	11.7611	10.5632	10.9895	11.9406	12.2854	11.8958	9.53451	10.1426	11.2909	11.5079	11.4206	12.034	13.1731	11.4599	11.5293	10.8506	11.3158	12.6024	11.5282	12.1691	10.7099	11.2926	11.3198	12.2527
VIM	19.8693	20.0109	19.8507	19.3112	19.5633	19.4767	19.9201	19.7834	19.4835	19.445	18.5572	20.6128	20.1061	19.3436	19.792	19.5788	20.3539	19.0673	19.9059	20.749	19.5391	19.4215	19.6801	19.6051	19.9386	19.4416	19.3165	20.1735	19.6536	20.7683	20.171	19.9299	20.4234	19.935	19.7926	19.6065	19.1781	19.9513	19.2408	19.9678	20.9379	20.3853	19.9719	19.8185	20.3757	20.447	19.8054	19.6282	19.786
SERPINF2	13.3432	14.5878	14.8544	14.1339	16.624	13.9531	14.3238	14.7002	14.6401	13.6385	13.153	14.1764	12.9111	13.0154	13.5346	13.9467	12.9985	13.1506	14.4116	14.1031	11.7782	14.3819	13.7163	14.5668	13.971	13.8193	13.874	14.0733	13.6679	16.1863	14.3749	13.8077	13.8971	14.1672	12.4481	13.7399	13.9373	14.7174	6.49471	17.7017	14.5594	14.2789	13.5697	12.8014	14.341	15.8597	13.0923	13.9172	13.5476
RPS17	15.4382	15.4363	15.5381	15.5588	14.6235	15.196	15.4763	15.2354	15.9407	15.0286	15.212	15.8987	15.5862	15.4505	15.3053	15.784	15.5147	15.1267	15.0835	15.7299	15.3981	15.1491	14.6794	14.8978	15.095	15.1947	15.9127	15.4476	15.589	15.1661	15.2864	15.4939	15.1105	15.5636	15.1826	14.9727	15.5198	15.2335	16.089	14.6577	15.7059	15.673	15.5418	15.3607	16.0789	15.4998	15.5107	15.7259	15.7105
KRT19	20.8455	21.0633	20.4894	20.677	19.1862	20.7507	20.7153	20.5435	20.0264	20.4725	20.4657	21.4267	19.7984	20.6836	19.9537	19.4862	19.0612	20.3351	20.8037	20.6648	20.4369	20.3988	20.3236	20.7888	20.8302	20.904	19.9584	20.2472	20.0588	20.357	20.2929	20.4991	20.2316	20.7338	21.0566	18.2892	20.5671	20.6251	20.3951	20.6979	19.3386	20.4906	20.2523	19.8674	18.8239	19.2238	19.9864	20.1404	20.0628
GNAI3	13.4251	10.3732	10.7365	11.9945	11.0186	12.3383	12.8332	11.3135	11.7292	11.0122	11.5661	12.021	13.2134	10.8015	10.6858	13.1215	12.0042	12.0836	11.9895	11.4171	12.1246	12.1913	12.1203	11.6572	12.2811	11.6949	12.9035	12.3864	12.0938	7.27146	11.3182	12.0245	13.8714	11.7975	11.9187	11.4059	11.7115	11.0292	14.3798	10.6371	12.61	10.9873	11.8717	12.9371	12.3241	12.42	11.2351	11.6464	11.5728
ANXA5	18.4854	18.3334	18.9261	18.2852	18.748	18.4825	18.9581	19.2103	18.6037	19.0683	18.525	18.8594	18.2081	18.6446	18.8278	18.056	18.3776	18.7214	19.1956	19.466	18.8691	18.5171	18.8227	18.7099	18.9541	18.957	18.6805	18.896	18.6163	19.0878	19.0432	19.4165	19.8193	19.0637	18.7076	18.8583	17.8662	18.9584	17.8366	18.9756	18.6105	19.0643	19.1686	18.6431	18.5312	18.8922	18.4945	17.9897	18.7275
RPSA	16.1999	15.7702	16.2053	16.0521	16.3779	15.9592	15.9528	15.7651	16.4086	16.1419	16.1983	16.4866	16.7753	16.2556	16.0457	16.5519	16.228	15.8992	15.8815	16.4028	16.0715	16.1555	15.9573	16.0269	16.0085	16.0697	16.4227	16.2396	16.2688	15.8437	15.6418	16.1649	16.1119	16.1216	16.1462	16.6728	16.0069	15.4028	17.6708	15.9988	16.768	16.4462	16.2529	16.8116	17.2391	16.5978	15.5883	15.8976	16.1573
MRPL3	13.1732	12.7779	13.3877	14.0599	13.0223	13.5292	13.1671	12.0603	12.628	12.8943	14.026	12.9346	14.1744	14.4319	13.8592	13.0835	13.4713	13.3645	13.669	13.0191	14.3265	13.3013	13.4819	13.752	13.5769	13.9715	14.0581	12.8887	14.0013	13.0307	12.8934	12.9237	13.1889	12.7223	13.3365	12.9303	14.201	13.3414	15.2701	13.1046	13.8559	13.4687	12.6052	13.8781	13.5832	13.8565	13.6618	12.8968	13.2786
SNRPA	12.7143	13.3978	16.6182	14.5299	14.8077	14.224	13.7651	14.6429	14.632	15.13	14.1366	14.0081	15.0146	13.7876	14.3303	14.1176	15.1597	14.0006	14.1707	14.4846	14.2522	14.2136	14.1402	13.6415	14.0157	13.7183	14.4021	14.1536	13.278	13.5459	15.6199	13.8034	12.5315	13.4023	13.8525	11.3367	15.1781	13.7007	14.7729	13.2628	13.9166	13.5863	14.5799	15.1678	13.9284	13.2067	14.885	15.7988	14.4412
CELA3A	13.5695	12.2553	16.044	15.9327	15.2551	16.3519	14.1087	16.163	15.2833	13.9681	11.5796	15.5783	13.5889	13.6423	14.7065	15.1971	13.5927	15.9919	15.5695	13.1126	11.7834	14.5026	15.9192	14.5918	16.143	15.4365	15.7267	13.9965	12.9183	15.7518	13.46	16.1357	15.8959	13.8193	11.9256	14.7137	14.189	13.0967	12.5298	14.3671	14.8486	12.6834	11.3109	14.3448	14.9464	12.5043	15.4145	14.3229	14.3051
ENO2	16.6592	14.4271	13.6251	14.1076	15.6761	16.0486	15.7959	17.2332	15.7645	12.7112	13.0736	15.3023	14.7397	14.5728	12.5673	16.156	16.0218	16.0337	16.6589	14.6448	14.192	14.6696	15.8359	16.2524	15.0623	14.8771	15.9797	15.4744	14.0465	15.8767	16.2587	14.1762	15.9387	14.991	14.3787	13.204	13.0817	16.8937	8.86643	15.6758	14.8475	15.0293	14.9012	13.4878	13.3947	15.4428	15.7195	14.4723	13.6568
ACAA1	13.7011	12.2535	14.5373	14.8735	14.5151	15.3337	14.5783	14.3978	14.1168	15.4455	14.4402	14.9455	15.149	15.2479	14.0548	14.7883	14.5044	14.5206	14.3165	14.5566	14.2012	14.2194	14.4287	14.3308	14.5689	14.8965	14.0714	13.8588	14.2647	13.3635	14.1292	12.861	14.6299	15.7105	15.9525	14.2877	14.5269	14.449	14.9849	13.539	14.5077	13.5921	13.1092	14.1465	14.1833	14.4623	14.1186	15.0402	13.2455
SRP19	12.2127	12.0761	13.3531	13.2065	11.2293	13.8808	14.9101	12.8234	11.0549	12.1833	12.8949	14.1868	12.8671	12.3091	13.035	10.7826	12.6436	13.8309	11.9536	15.0958	12.9453	13.6233	12.3723	11.6052	13.8841	14.0669	13.2055	14.1396	14.1749	12.4441	12.8339	13.3335	14.587	13.8627	12.8827	10.7972	12.2154	11.2606	6.55847	11.1792	12.7052	13.6341	12.4121	11.834	14.7658	11.4267	13.4246	12.1788	13.9645
GSTP1	16.8264	17.0475	16.6092	16.7853	16.5428	16.8603	16.6262	16.3941	16.6926	17.2883	16.2854	16.6921	17.032	16.9027	16.2586	18.2119	17.1567	16.2584	16.4792	18.0747	16.2176	16.5357	17.473	16.2103	16.3577	16.3089	17.4486	17.6088	17.0187	17.1836	16.1083	16.5357	17.0325	16.7278	16.2627	17.5211	17.3623	16.9861	16.1747	17.9189	17.6949	16.0615	16.1529	16.9554	17.3009	16.3222	17.6207	16.2323	16.4776
VIL1	16.4019	16.5392	16.7225	16.5747	15.6797	16.291	16.5227	14.2191	15.411	16.5076	16.8486	16.0868	16.2839	16.9627	15.8832	15.1998	16.3745	16.4957	16.3226	16.1749	15.7894	16.2475	14.9126	16.2915	16.4595	16.9032	15.7047	16.4098	16.8264	16.117	16.2529	14.6132	16.0839	15.9699	16.2806	17.61	16.7034	14.5672	16.1895	16.3364	16.575	15.339	17.0667	16.7985	16.7557	14.7402	15.8557	16.9377	16.2289
LGALS1	14.7033	15.5546	14.6645	14.4503	14.8363	14.4417	15.716	15.161	14.7956	14.4889	14.1475	15.707	14.5634	14.5605	15.3556	14.5443	15.2585	14.8105	15.2884	15.9546	14.5672	14.4102	14.4083	14.3422	14.7031	14.5344	14.642	15.1297	15.1463	15.3654	14.5689	14.5739	15.171	15.6282	14.6878	14.5747	13.4615	15.5262	15.5784	15.0348	15.5278	15.729	15.3599	14.1418	15.768	15.5092	14.9101	14.7304	15.2516
QDPR	15.3897	14.0266	15.0695	14.1082	14.5166	14.4835	14.2508	14.1214	14.2771	14.9898	14.3525	14.1094	13.9489	14.4515	13.8923	13.9649	14.5846	14.7945	14.5721	14.554	14.8508	14.3255	14.4381	15.0394	14.595	14.5696	14.6044	14.1354	14.6149	14.065	14.1287	13.998	14.3698	15.1729	14.6206	14.1758	14.6139	14.9845	16.0738	13.7408	13.5922	14.795	14.448	13.9974	13.4066	14.2313	14.6689	14.8676	14.4477
HMGB1	18.7618	18.8872	18.0692	17.5015	18.5788	17.5987	17.3349	17.6007	17.7618	18.688	18.9741	17.9587	19.7525	17.8059	17.8035	17.7383	19.0227	18.2495	18.1019	17.8964	18.5074	18.9088	18.3455	17.7352	18.2703	18.3045	17.6962	18.8294	18.5166	17.2263	17.2851	18.0781	18.106	18.4523	17.7244	18.4132	18.3064	18.2484	20.0375	17.8441	18.7211	19.2017	17.4448	19.0482	19.2683	17.6022	17.575	18.717	18.3902
RBP1	11.0732	12.071	12.9631	12.2491	10.9292	10.2959	12.0158	12.2595	14.7932	12.8472	13.2761	13.8395	10.2268	14.2199	12.3593	13.0867	12.3486	12.0534	13.9462	14.3446	12.5648	12.5865	12.7946	12.3688	13.7313	16.2367	11.9696	12.5603	14.5897	13.8593	12.3613	11.6878	12.6271	10.4401	12.4074	11.8485	12.4826	12.8777	11.9772	14.4163	11.3165	12.6168	12.2591	12.7849	12.2137	11.629	14.2562	11.5049	13.1759
FBP1	13.6977	13.534	14.2365	13.9757	12.6604	13.1612	13.1442	13.4059	13.6518	15.3581	12.6761	12.7763	14.3671	13.4858	13.0237	14.5427	15.1308	14.8331	14.4556	13.8247	13.53	13.5007	14.1755	14.496	13.6812	13.3254	14.932	13.3981	14.0216	14.3186	13.185	14.5772	14.2748	13.204	12.9345	14.1449	13.5788	13.8743	12.1706	13.9655	13.2872	13.6064	13.6274	14.4768	14.193	14.5108	13.8193	13.6909	13.5036
GNAO1	16.074	16.191	16.8775	12.8255	13.1576	16.056	15.681	15.2789	17.7229	13.5667	13.7191	16.4244	13.8029	13.0163	14.0838	14.9416	11.4854	15.6975	15.9687	15.6198	15.0146	15.643	14.1087	14.1383	15.6627	16.5321	14.984	15.8498	14.3174	10.7139	13.5313	13.5207	15.7886	16.3537	15.9182	15.1328	13.9919	15.9818	9.99265	14.4025	9.95929	15.914	13.118	13.01	11.7301	13.5851	16.4311	13.7579	13.269
SPARC	10.932	12.2965	11.604	10.5703	10.7729	11.1958	14.2667	12.2727	12.9232	10.4559	9.57215	12.585	9.86364	10.1494	11.5701	12.1769	12.0283	10.3951	11.7042	12.5286	9.81768	10.1024	9.39732	9.03713	9.73536	10.059	11.5269	10.9976	11.4788	13.7296	11.4047	11.7445	12.5937	12.6	11.2418	11.8537	10.5676	11.256	12.249	10.6278	13.6349	12.8769	11.7551	12.9569	13.267	14.2421	12.6649	10.5283	12.9467
TPM1	17.1901	19.4493	18.3349	18.2876	18.5017	19.1933	18.8679	19.6902	18.1321	18.8175	17.3497	17.4835	16.989	18.1579	17.1715	17.8272	18.8307	18.4332	19.5004	18.5568	19.3066	18.0639	19.3733	19.1595	18.8095	18.4889	17.9545	20.7532	18.7894	19.1293	19.6886	18.5478	19.2433	18.7689	18.787	18.1107	17.6678	21.6665	17.8603	17.9026	17.9384	19.6697	18.1264	18.1879	18.5199	18.1331	18.3027	17.426	18.3478
CLTB	12.8691	13.898	12.8923	14.0317	11.8927	14.3294	14.0708	13.8266	13.357	13.7292	12.6772	13.4373	11.769	13.5386	13.4663	13.1245	11.8331	13.0844	14.1412	13.3305	12.4363	12.5299	14.1601	14.2333	13.3593	13.104	13.7739	13.2597	13.1817	14.0893	13.2788	13.8696	12.4848	13.3644	13.1725	11.9752	13.475	14.2896	10.095	13.5769	12.946	14.1015	12.6126	12.8629	12.4489	12.5039	13.2967	13.8265	13.6798
ANXA4	16.1523	15.2832	16.2109	16.4789	14.3525	16.4747	16.4672	15.6582	16.3809	15.8508	16.4461	15.4906	17.3777	15.3938	16.3735	15.2037	16.952	16.4396	16.6166	16.3294	16.8694	16.2215	15.8929	15.9789	15.9417	16.6658	15.7515	16.1262	15.8563	15.1859	16.3551	16.0241	16.6334	15.9131	16.1798	16.046	16.9599	16.2495	17.0302	15.9124	16.9217	16.3903	15.4534	16.7215	17.0969	15.8651	15.6372	15.7693	15.768
CNP	15.3682	15.1277	14.6457	14.4442	13.6006	14.7603	14.7254	14.8589	14.5747	14.0733	14.9206	13.7323	14.5584	14.5961	14.559	14.3075	15.3591	14.4981	14.6958	14.6669	14.4931	14.507	13.7146	14.2953	14.5169	15.3155	14.1008	14.5535	13.6104	14.8214	14.8439	14.5905	14.1358	14.6207	14.4721	14.0819	14.4727	15.5403	15.6813	15.5365	15.7925	14.4205	14.7587	14.8933	14.8838	14.7988	15.5207	14.6872	13.857
HMOX1	13.6965	12.3385	13.2112	12.7297	11.9139	13.6551	13.4153	13.7529	13.736	13.0661	12.5937	13.478	13.7738	13.2596	14.2611	14.0376	13.0857	13.3022	13.3532	13.4793	12.3295	13.3658	13.5006	13.5396	13.5623	13.7682	14.1511	13.2906	13.4343	14.1234	13.5343	12.9631	13.3063	12.6427	14.1463	13.746	13.665	12.454	11.6629	11.5316	14.287	15.3158	14.1047	11.6974	12.3615	14.3408	13.2947	13.2914	13.5316
PDGFRB	14.5567	14.269	14.4297	11.9662	12.7251	13.6655	14.9834	13.8449	13.2058	13.5205	11.7747	14.3544	12.4868	14.4278	14.8262	13.7109	14.687	14.6554	13.795	14.303	12.8419	12.6829	13.4728	12.0676	13.2577	13.6548	14.0289	14.3464	14.4545	12.0106	14.5514	13.2493	15.3345	15.0398	13.3998	13.4887	12.4554	12.857	7.77906	12.3619	13.331	14.8014	12.173	12.6416	14.2163	13.5186	14.4229	12.9792	14.1078
DLD	13.756	14.499	13.9458	14.1764	13.9959	14.1865	13.8174	13.8016	13.371	13.5943	14.0022	14.4931	15.2303	13.8005	13.6376	13.615	14.5661	14.5954	14.1082	14.1578	13.7901	13.8864	13.8819	13.6251	13.7968	13.1594	13.5298	13.7949	14.2214	13.7132	14.0291	13.895	13.5692	13.5009	14.8459	13.6181	14.1419	13.4189	14.1547	14.0894	15.186	13.9488	13.6659	13.7318	15.0866	13.8657	14.8928	13.9604	13.7313
HNRNPA1	16.669	16.8451	17.3215	16.6513	17.003	17.0924	16.8766	16.9826	16.8307	16.9369	17.2392	16.5693	17.434	17.0463	17.3126	16.4743	17.6722	16.8967	16.861	16.7615	16.9031	17.2848	16.862	16.8665	17.1744	17.2517	16.6587	17.1285	16.7841	16.6603	17.2123	16.7637	17.286	16.5212	16.7702	16.5753	16.9017	16.5465	18.0118	16.8531	17.9945	16.9769	17.0436	17.3074	17.6114	16.805	16.5965	16.7811	17.0092
SNRPA1	15.5043	15.1048	15.4573	15.5598	15.6938	15.429	15.337	15.5985	15.8942	15.3983	15.8432	15.7513	15.1816	16.0131	15.5138	15.73	15.368	15.109	15.3419	15.9467	16.0903	15.6113	15.389	15.4597	15.7889	15.7192	15.5961	16.4187	15.6743	15.0945	15.6301	15.9383	15.7024	15.4487	15.7437	15.5478	15.5801	16.0592	15.7977	15.9343	15.5519	15.7428	15.6352	15.6357	15.6327	14.8914	15.3903	15.5944	15.8997
CTSH	13.7449	13.4983	14.1795	10.8416	12.214	13.4577	13.2797	13.1971	13.5147	12.7838	13.3487	13.2916	10.8687	13.3265	13.6709	12.6314	12.7784	12.7507	13.0346	13.4796	12.3402	13.2521	12.0711	13.9602	13.8953	13.5325	13.6711	13.372	13.2476	13.5935	13.9818	13.934	13.3472	14.1517	13.9591	13.3702	13.6242	14.3627	12.5869	13.4594	11.951	13.2066	13.7405	12.5872	12.4825	13.6997	13.4498	14.2427	13.7099
COX6C	15.3367	16.1137	15.6506	16.1918	15.0187	14.3994	14.7186	14.542	15.527	15.1298	15.7784	17.0877	14.0189	15.973	14.6979	16.2757	14.8736	16.4967	16.416	15.8361	13.5983	16.1524	16.7878	16.8057	16.4627	16.603	16.4493	15.4554	13.9995	15.6357	13.5387	15.4131	14.7291	15.9022	15.7989	14.6341	14.6642	15.1252	14.2187	16.5016	15.1978	17.2995	15.5931	15.0403	14.5977	14.7721	16.4322	15.6539	15.7437
C1S	13.5278	13.8963	12.3797	12.6417	13.9179	13.468	13.9253	14.1268	13.475	12.5086	10.7972	13.0879	13.5595	11.4162	13.3818	13.1695	13.8864	11.8889	13.6429	13.2193	11.985	12.7623	13.5104	12.1913	12.9295	12.061	12.6713	13.9856	12.7841	13.6932	12.9572	12.9534	13.9448	13.0814	13.3057	13.5458	12.3958	15.0444	12.2922	13.6096	12.6707	13.3923	13.1058	11.5918	13.9044	14.1396	13.3396	12.8078	13.7569
PARP1	14.6077	14.385	15.2975	14.4803	15.3747	14.6048	14.2596	14.599	15.5013	14.5057	15.1591	14.5983	14.904	15.1618	15.0285	15.0129	15.414	15.2991	15.2289	14.9464	14.941	14.5304	15.0006	14.7379	14.5379	14.8124	15.0101	14.9289	15.2868	14.9197	14.2655	15.2764	14.6074	14.4984	15.3455	15.4651	14.7894	14.0191	14.7345	14.7283	15.2434	14.7844	14.6783	14.7354	15.2959	14.4184	15.1791	14.8468	14.9273
POLA1	13.1287	11.9805	13.8182	13.2545	13.9298	11.7482	12.1845	12.5363	12.2532	12.0932	13.6667	12.0322	12.9563	13.1666	11.7202	13.1866	13.0309	12.0316	11.7375	13.3496	12.2135	13.0573	12.3857	12.4319	12.9526	12.1032	12.8045	13.3097	12.7361	12.3397	13.355	13.0635	11.732	12.0249	12.8861	13.3545	12.514	12.626	11.8678	12.0542	13.5141	13.0227	14.1028	13.4064	12.6237	11.3055	11.9871	13.1889	13.3143
ALOX5	12.3782	13.4852	13.5794	11.8419	16.1472	14.2464	14.0851	15.627	13.8591	12.5879	11.847	13.0127	13.7109	11.8168	13.6928	11.9557	13.2764	12.664	12.7335	13.1115	13.1802	12.4693	12.3165	12.17	12.746	10.2615	12.8595	12.43	11.7711	14.332	13.0033	13.5294	13.5101	12.6244	12.1631	13.4173	12.8063	11.5993	11.7727	16.6775	13.8293	12.9058	13.2186	13.0113	12.5625	16.1268	12.9904	12.0384	12.3786
LTA4H	15.5227	15.4085	15.3543	15.0473	15.2897	15.3231	15.315	15.8831	15.5141	14.7289	15.13	15.6687	15.7423	15.3238	15.6825	15.2085	15.8213	15.8127	14.9387	15.3426	15.2566	14.835	15.0875	15.343	15.0747	15.1405	15.1885	15.1875	15.1949	15.7594	15.2732	15.7683	14.9956	14.9278	15.2051	14.4826	15.0637	15.3128	15.2238	15.8128	15.9753	15.0938	16.072	15.3622	15.0648	16.2295	15.2287	15.085	15.1153
ALDOC	14.4178	13.9086	14.336	14.1266	15.8146	14.0839	16.9748	16.0682	15.473	15.3659	14.7661	15.1619	15.9967	15.0134	17.1082	14.3966	15.5634	14.6279	14.5785	15.006	15.194	14.8057	14.9957	14.3756	15.2412	13.1581	15.0936	14.0378	16.5689	14.2975	14.6214	15.3129	16.8635	13.9017	15.1572	15.0384	14.3066	16.8076	15.723	14.2781	15.8395	17.035	16.8114	15.3752	16.0929	16.8327	14.8231	14.9455	15.374
C4A	15.2888	16.5403	15.5573	15.5171	16.5419	15.6877	16.1911	15.9887	16.1588	14.5119	14.3824	15.5469	14.836	15.3347	15.6566	15.1027	15.3445	15.2723	14.9063	15.633	14.0232	15.9479	14.9067	15.0532	14.2944	14.8708	14.8515	14.3718	15.8497	17.2266	15.4565	15.9227	15.5353	15.4152	14.346	14.7939	15.4152	16.2055	14.1056	17.5634	15.5362	15.7293	14.6892	14.9653	15.9023	17.6102	15.768	14.7765	15.0143
C4B_2	13.1299	13.896	13.8111	13.8127	16.0807	13.5596	14.6761	15.0623	14.1237	13.3652	13.2164	13.4715	11.9225	13.3128	13.9801	13.6087	12.8007	13.1182	13.1943	13.7537	12.9221	13.6867	12.6954	13.5456	11.9825	13.2164	13.7626	13.2489	14.0504	16.0044	14.5935	14.1109	14.0141	13.1295	11.9117	13.7933	12.3625	14.5005	11.2186	16.8265	13.9422	13.3235	11.8446	13.6381	13.5364	15.9068	13.2961	12.8399	12.2359
H2AZ1	15.8902	15.0662	15.7677	16.0151	16.9606	16.1676	15.8462	16.5037	17.3627	16.703	16.1088	16.4968	15.4595	16.2137	16.3776	16.1381	16.9022	16.0911	16.4567	16.4568	16.5117	16.2844	16.4264	16.4443	16.3197	16.0639	16.8453	16.8058	15.6408	16.5796	16.6089	16.3451	16.4516	16.082	15.8752	14.5435	16.1985	16.9063	14.8729	16.5587	15.6055	16.1719	16.0236	15.9215	15.6837	16.5512	15.6795	15.5218	15.8775
GSTT2	16.7886	16.9198	14.2996	17.0155	17.5059	17.3239	17.9026	17.7713	14.5138	16.8135	16.3191	14.6385	17.4476	14.6367	17.2731	14.9061	14.8909	17.0544	16.0624	17.5024	14.2077	13.1388	15.0676	16.8732	13.284	17.1892	12.2547	18.0019	17.0318	12.0767	15.0788	14.0085	15.3793	14.1554	13.3378	14.8433	11.6152	15.0961	11.0198	16.9236	13.7473	15.1667	14.1821	15.7368	16.328	14.7331	14.203	10.5716	17.3241
POTEI	17.411	17.0507	17.0484	18.1289	16.7921	17.5785	17.7886	17.4485	17.6386	16.8668	16.8256	17.3578	18.6208	16.3624	17.1111	17.0239	16.809	17.4701	17.0634	17.6234	17.0479	16.4417	16.4455	16.5916	16.9866	16.7402	17.4744	16.8479	17.7058	17.3741	16.9379	17.0567	17.8018	17.4637	17.3854	17.2478	17.4713	17.5238	18.7193	16.2905	18.5278	17.2755	16.816	17.6838	18.0044	18.2405	16.9809	16.7984	16.923
SULT1A3	13.4351	13.3458	11.9839	13.9906	12.119	12.2446	13.2877	14.1984	14.088	12.4753	14.5224	14.5265	15.4922	14.3575	13.1566	13.411	14.4123	14.541	14.3858	13.8039	12.6955	13.112	14.2973	13.5602	13.3004	13.8719	13.1649	13.9981	12.9324	12.38	13.0783	14.1051	13.0581	12.8186	14.0793	13.9538	14.5006	11.4595	15.1573	11.2053	14.8934	12.258	14.6668	13.6726	15.0368	13.4977	11.4822	13.6161	12.8389
HSPA1A	16.9015	16.6195	16.0354	16.3997	16.294	16.6796	16.5568	16.6918	16.7146	16.4653	16.7984	15.515	16.534	17.3766	16.4485	15.9686	15.8599	17.8742	16.8241	16.4108	16.8248	17.1005	17.3282	16.7346	16.9381	16.9365	16.9721	17.0028	16.0081	16.8003	15.9485	16.7437	16.4194	16.5516	16.8249	16.4207	16.8241	17.1089	15.6395	17.2336	16.4534	16.198	16.2566	15.5976	15.1037	16.4613	16.8163	16.4505	16.4897
IGLC2	12.7257	17.7402	15.3752	16.6766	17.3798	14.9568	16.1897	16.8561	17.496	15.5854	16.0056	16.065	18.1709	15.968	16.0174	15.752	16.3881	16.558	16.9591	17.0334	14.7341	18.2804	16.8204	16.3769	15.6316	16.3335	15.4932	15.7031	16.6377	18.3776	15.6498	15.4312	16.2786	15.2637	15.7106	16.2356	14.5736	16.0619	14.4949	17.0742	17.6578	15.7334	16.3719	17.4541	16.7484	17.9761	16.6238	16.7066	15.8471
CALM1	17.3504	17.6242	18.0154	17.9707	17.9769	17.8978	18.0054	17.5433	18.3055	17.7809	17.7792	18.0531	18.6009	18.3151	17.7262	18.4323	18.2901	18.5595	17.672	18.1092	17.97	17.3086	18.1693	18.4442	17.0984	17.5247	17.8974	17.6009	18.3109	18.3722	17.8744	17.5552	18.5889	17.4801	17.6798	17.1219	18.184	17.6459	18.2208	17.7931	18.8345	17.8761	17.5311	18.6889	18.5609	18.1133	17.3584	16.7242	18.3019
POLR1D	14.1134	14.0112	13.7404	14.8014	14.2492	13.8185	13.8595	14.1147	14.3071	14.0759	14.7286	13.6742	12.5534	14.785	14.0112	13.8714	12.2623	13.9324	13.3335	14.077	13.9765	14.5832	13.6475	13.11	13.7901	13.5367	14.3198	13.8633	14.1924	14.4294	13.2811	13.3913	13.7816	13.7119	13.9572	14.1983	14.2183	13.5329	14.1859	14.1383	13.647	14.502	13.43	12.9012	12.4092	14.1029	14.5026	14.0813	14.2168
FDX1	13.9129	13.7625	13.598	13.6937	11.9753	12.9503	13.1298	13.0431	13.5059	13.4459	13.2479	14.0029	13.5972	13.6029	14.1184	13.337	13.4628	13.4452	13.7219	13.7029	13.6375	13.4775	13.5283	13.7398	13.8073	13.275	13.8255	13.9085	13.3792	13.3065	14.1418	13.2331	13.9199	12.9599	12.4967	13.5606	13.1361	12.9604	12.0468	13.1418	13.6267	13.7225	13.485	13.4423	13.7553	14.1864	13.2457	13.7107	13.7464
RNASE2	15.1252	14.1923	14.1418	15.1725	13.1778	14.8526	14.2465	15.8891	15.0421	14.6722	14.2397	14.5443	14.491	14.3652	14.6747	14.6394	13.8008	14.9418	14.7032	15.8368	14.1157	15.7429	15.7888	14.2125	15.8575	15.0082	13.4495	14.8442	14.5745	15.2915	14.4533	14.2878	14.1817	14.1947	15.2698	14.6996	14.2525	12.1826	10.4829	13.8925	12.4475	14.3719	13.5444	14.6441	13.5405	17.899	14.5931	14.6464	14.1328
RO60	14.2983	12.3312	13.6898	11.5341	13.4931	13.9771	14.0451	13.9329	14.231	13.2582	13.2382	13.1787	15.0166	14.1495	13.853	13.2114	14.1383	13.6516	13.9182	13.8299	15.0691	14.042	13.1929	13.6235	13.6762	13.4498	13.6553	13.1318	13.8888	12.9907	14.0439	13.2059	13.7346	13.563	13.1497	13.6648	13.3011	15.5537	14.7396	12.8664	14.0067	13.4966	13.3522	13.9859	14.0358	14.1826	13.8262	13.5757	13.7553
GAA	13.7878	13.9374	13.4436	13.9894	14.2486	14.9089	15.2442	14.4236	15.7209	13.8506	14.189	14.2863	14.3331	14.0751	15.3005	13.9422	13.6927	14.211	14.0549	14.0892	14.3276	14.5742	14.1236	14.1106	14.2828	14.6764	14.8573	14.0912	14.0969	14.8632	14.4373	14.695	14.1601	14.0533	15.3331	14.9241	14.5874	13.5677	14.6837	14.4742	13.6326	14.5637	13.4858	13.6973	13.8775	14.7384	14.0664	14.3742	13.6358
RRAS	14.1394	14.5364	13.7805	14.0374	13.8565	14.8084	14.4391	14.6474	14.4024	13.7786	13.6739	14.1025	14.4892	13.6157	13.8214	13.4163	14.3133	13.8377	14.3764	13.8427	14.2145	13.9857	14.2412	14.649	14.1182	13.682	14.5238	14.3407	14.0232	14.6783	14.2507	13.7865	14.7408	14.4335	14.2035	13.7744	13.946	15.9851	13.6058	13.7761	14.3118	14.4923	14.1451	13.9181	14.6193	14.3183	13.8869	13.7178	13.9274
HLA-C	15.1419	15.6895	13.2	16.5619	16.772	14.8862	17.077	16.1713	16.0026	16.2178	14.6258	16.7515	15.5767	13.5771	15.005	14.8884	15.2746	14.1442	15.068	16.0159	16.4873	11.7602	13.7196	13.2573	14.1628	16.4058	16.435	14.8228	14.8581	14.6479	16.4772	16.4822	17.1318	12.9067	14.0002	16.8068	15.3537	13.0817	14.4504	16.5375	15.4666	14.2743	14.281	18.1129	15.6027	18.0139	12.5678	13.597	16.0509
H1-4	19.0624	19.9649	18.8232	18.7131	17.329	18.7795	18.7112	18.9131	18.3902	18.882	19.5426	18.35	16.9985	18.5643	18.796	18.5453	18.0873	18.6113	18.7551	18.13	19.2879	18.8828	18.8137	18.953	18.9341	18.5726	18.4562	19.0095	17.3612	19.0721	18.6974	19.4286	19.152	19.0075	19.0553	18.8038	19.1765	19.6735	21.2482	19.1187	17.3035	19.859	18.6939	17.7118	17.462	18.8985	17.8494	19.1038	19.7127
DLAT	14.85	14.7016	15.3384	14.5719	14.4871	15.6291	15.2764	15.0971	14.8384	15.5898	15.3154	15.1839	15.4065	14.8663	14.4819	16.3194	16.4305	15.2613	15.1532	15.3782	15.4255	14.804	14.9833	14.9729	15.2713	14.7889	14.9137	15.5701	15.1602	14.3713	15.4795	15.1736	15.1826	15.2505	15.4464	15.3161	15.5231	16.2896	15.4642	14.9071	15.4759	15.3486	15.0143	15.3664	15.4184	14.6884	15.5923	15.0371	15.1357
PTPRF	18.2402	20.4738	17.0855	16.4837	17.7349	18.3118	19.6842	19.043	15.9319	18.072	14.8761	15.7936	16.3525	16.4051	17.261	16.4654	15.1687	16.5193	18.721	16.9441	18.5714	16.9311	17.5197	18.4325	18.1829	17.0482	16.4151	18.7248	17.2975	19.1251	19.6074	17.0989	18.5779	17.6677	16.7933	17.0435	14.666	19.6972	15.4857	17.1544	16.4394	17.8992	14.7041	16.7583	16.2642	18.1008	17.2111	14.8315	17.8864
TXN	16.5667	15.8143	16.1023	16.3999	16.536	15.7937	16.3219	15.8608	16.4174	16.5798	15.9502	16.3609	16.256	15.6245	15.6843	16.4205	15.4896	15.8358	15.8864	16.3268	16.1223	16.1626	16.0349	15.9784	15.4732	15.7137	16.5749	15.4596	15.637	15.6868	15.9547	15.962	17.3956	16.2617	15.7408	16.1463	16.0145	16.4108	16.3049	15.9101	15.7882	16.4663	15.9808	16.4499	16.0301	16.2126	16.1319	16.1635	17.0629
COX5B	16.982	17.5874	17.6175	17.8693	16.9256	16.6045	16.8183	16.4587	17.4517	17.6952	17.027	18.1845	16.7041	17.5115	16.9287	17.5644	16.9987	18.2054	17.8627	17.5527	15.9	17.4956	18.2316	18.3468	17.962	18.1686	18.1758	17.5342	16.5064	17.0763	17.2501	18.0841	17.5671	17.7301	17.5524	17.1125	17.7673	18.4182	16.6071	17.6958	17.3051	18.6982	17.2839	17.1674	16.8063	16.8284	18.1115	18.2056	17.5809
CTSA	14.1348	14.0864	13.7457	14.3534	13.97	13.2013	13.48	13.862	13.8498	13.4833	13.9004	13.9775	12.5605	13.5295	13.6048	13.9253	13.8711	13.7585	13.8494	14.2901	12.9705	13.5482	13.316	14.0558	13.6123	13.5383	14.1354	14.3056	14.2242	14.0996	14.1669	15.0377	14.1367	13.7641	14.0222	14.335	13.7825	13.4439	13.4766	13.4531	13.4714	14.2169	13.2223	13.4783	12.8404	14.6836	14.0419	13.6881	13.4231
MGST1	15.6936	16.8517	16.2305	15.7221	15.6786	16.1929	15.6298	16.6844	15.8982	16.3286	16.2347	16.3945	16.646	15.5636	15.1368	16.7507	16.3067	15.6176	15.2245	16.3877	16.2866	16.2414	15.8882	15.4688	15.8872	16.2745	17.161	15.1308	16.1089	14.9456	16.507	16.1475	16.2289	16.5743	16.6456	16.3492	17.0773	15.3878	16.7519	15.7937	16.1006	15.9727	17.1604	16.5432	16.4612	16.0219	15.6317	17.1152	16.1643
C7	13.4591	14.0853	13.7518	13.7657	16.2064	12.6725	13.3704	14.4806	14.088	12.8352	12.9132	12.1148	13.5499	13.3265	13.8522	12.897	12.7224	12.8481	13.2772	12.8556	12.536	13.5401	12.7017	13.1682	12.9114	13.1989	13.7002	13.3739	13.2815	15.0572	14.0396	13.8283	12.6222	13.4414	12.9887	12.9622	12.1754	14.5493	12.0511	16.8614	13.3169	13.2239	13.6214	13.6811	13.3905	15.1996	13.9836	12.9589	13.2762
PRKAR1A	14.4936	13.1139	14.2379	13.8799	14.3518	14.6746	14.423	14.44	14.8797	13.9694	14.0825	14.8562	14.9369	14.1374	15.2709	13.884	15.0836	14.3027	13.8691	15.0465	14.2814	14.3141	13.8525	14.3578	14.2765	14.4803	14.9064	14.3205	13.9392	14.1628	14.4615	14.1273	14.5336	14.3467	13.6029	14.1349	14.8201	15.1064	13.1621	14.3327	15.5068	15.312	14.1657	14.4494	14.6184	14.4237	14.4424	14.3484	14.0303
CHGA	12.0641	14.616	11.5978	18.1489	13.6582	16.3414	12.3615	12.7849	15.6629	14.6314	15.7846	16.6464	12.4956	12.7902	12.7092	13.8903	18.3838	17.6838	16.4335	16.0708	10.9393	13.7523	17.6738	17.7176	15.5408	13.6347	15.0736	16.9752	13.6417	14.9442	14.5455	14.2067	14.4185	12.0482	16.3567	12.5454	13.3873	11.286	10.8164	10.9179	18.1551	11.7747	15.0529	16.3562	18.0282	15.87	15.1701	16.055	13.5269
ESD	15.5784	15.0645	15.3562	14.7591	13.3459	14.7031	14.8718	14.9846	15.1949	15.343	15.7818	14.9883	15.5474	15.7254	14.7561	14.8966	15.2091	15.4598	15.3282	15.4539	15.2439	15.7888	15.7409	15.2588	15.3454	15.9708	14.2623	14.7332	14.5461	14.7224	14.3787	15.021	14.5675	15.5607	15.5271	15.781	14.6111	15.7312	15.4239	15.2496	15.0447	14.9339	14.9168	15.0904	15.3758	14.5829	15.6395	13.9505	15.0808
HSPD1	17.3333	17.9755	17.768	17.8745	17.7315	17.673	17.91	17.5097	17.327	17.9732	18.0218	17.8265	18.284	17.7957	17.5158	18.1909	18.6273	17.7324	17.584	18.0214	17.9819	17.7273	17.3084	17.2964	17.5835	17.7966	18.1131	18.0447	18.3556	17.0473	17.2905	17.3496	17.45	17.6268	18.3261	17.8232	18.1529	17.9403	19.2446	17.9238	18.5676	18.2543	17.6437	18.5574	18.3492	16.7474	17.983	17.6513	18.132
CLU	16.6701	15.8335	16.0602	15.3015	18.8977	16.0698	16.0018	16.8751	16.18	15.6871	14.9718	16.007	15.6209	14.9544	15.467	15.4272	15.482	15.0218	16.246	15.8431	15.2301	15.948	15.1062	15.3906	15.2988	15.1744	15.869	16.0209	15.8112	18.1635	16.1973	15.9885	15.8966	16.0302	14.9236	15.4898	15.1219	17.5063	15.1732	19.3094	16.2047	16.1499	15.4649	15.3725	16.0478	18.315	16.4659	15.6288	15.4724
HSPA5	18.0865	17.2901	17.2877	18.0667	18.7788	17.7021	18.8099	17.7247	18.3578	17.4492	17.9257	17.9127	17.4975	17.8809	18.2314	18.323	17.9595	17.9749	17.9358	17.9415	18.3004	18.0558	18.1246	17.9742	17.713	17.8644	18.0815	17.628	18.0979	17.7139	18.1144	18.0677	18.2284	18.0101	18.2238	17.8195	18.068	17.9854	17.6853	17.7362	17.4713	17.8152	17.7485	17.8602	17.8986	18.414	18.0439	17.7924	17.7981
LAMC1	16.559	17.0996	15.3421	14.9122	16.5331	15.8178	16.7719	17.9811	15.5903	16.2735	14.771	15.9988	15.8191	15.7494	16.4003	15.6563	16.3331	15.2249	16.2024	15.7629	15.7918	15.8792	15.5575	15.5957	16.3733	15.98	15.7449	16.6555	15.903	16.8372	16.9912	16.2836	16.2087	16.0779	16.1212	15.851	15.811	18.1089	14.4765	15.8523	16.5014	16.7825	15.9755	15.9013	16.4407	16.7192	16.8006	15.6694	15.4441
ACP2	14.6324	15.434	14.9362	14.8147	14.2489	14.4883	14.8821	14.6297	15.4646	14.0059	14.1928	15.224	14.9435	14.5326	14.415	16.0329	14.1401	14.6438	14.5572	14.7451	14.5901	14.8666	14.0583	14.5919	14.8487	14.8069	15.2487	14.697	15.0404	15.176	15.1245	15.2203	14.9373	14.8879	14.9287	15.0009	14.3881	12.8505	15.4724	15.2248	13.6015	14.9155	14.9604	14.2932	15.1609	15.1611	14.7402	14.7775	14.9816
HSPA8	18.0399	17.8245	17.9662	17.698	17.7786	17.4544	17.7801	17.7259	17.5161	17.7174	17.9937	17.9442	17.8563	17.9956	17.8687	17.9413	18.0856	17.4785	17.4756	18.2324	17.428	17.8289	17.3995	17.5783	17.8232	17.8173	17.7056	18.0127	17.9547	17.3243	17.8424	17.655	17.6531	17.7534	17.7923	18.1839	17.8838	17.8413	17.2983	17.5026	18.0136	17.6137	17.9718	17.6424	18.0586	17.4913	18.0612	18.0605	17.842
SLC2A1	14.9965	16.2102	14.3805	13.9441	15.1842	16.6001	14.4745	16.0319	14.9812	14.8498	14.9526	16.181	14.7251	15.1754	17.3594	14.761	15.403	13.8354	14.4882	16.3319	15.459	15.0248	14.5184	13.9623	14.897	15.6371	16.0691	14.6609	15.0112	14.9139	15.3645	13.9731	14.4743	14.7921	14.8865	14.7513	15.1023	15.7249	16.5383	15.2517	15.9322	13.7015	14.2271	16.9467	14.1446	14.5293	17.1585	15.6847	14.0247
EPB41	14.3576	12.5502	14.1198	15.0058	13.5956	13.6792	13.0164	13.5288	14.1271	14.0593	14.2866	13.6814	14.2205	13.7578	14.3782	13.9391	13.3699	12.9592	13.477	13.6793	12.9239	13.4261	13.3389	13.6622	13.0882	13.6414	13.8128	13.6072	13.632	13.7363	13.3174	13.1729	13.1912	13.4779	12.409	13.6321	14.2883	13.0578	11.0959	13.6243	14.2925	14.2344	13.8763	14.5268	12.4824	14.4002	14.3998	13.8647	13.6737
UMPS	16.0982	15.6225	14.3254	14.6455	15.6528	16.3769	15.8073	17.3261	15.7402	16.0724	15.5984	14.9594	16.5492	16.6506	15.1668	15.47	15.5834	14.519	15.1541	16.4668	15.4423	14.9839	15.2428	15.8078	15.3115	14.9034	15.2067	15.5026	15.1642	16.1229	17.0535	15.2606	16.0242	16.0404	15.6439	16.1543	15.6477	16.2366	14.2811	15.6994	16.5406	15.4482	15.9132	16.3377	16.8156	15.7243	14.8049	14.5234	14.8615
PDHB	13.1865	13.326	13.9311	14.5222	14.0369	13.8459	13.0441	13.4463	13.9626	14.75	14.3476	14.2002	14.0282	14.0537	13.6896	14.5209	15.065	14.5765	14.3314	13.9826	14.5405	13.8106	14.902	14.2281	14.2797	13.805	13.9408	14.8429	15.0204	13.9177	13.4246	14.0919	14.4281	13.9398	15.013	14.2105	13.9867	14.8214	15.2528	14.035	14.736	14.7111	13.5385	15.1935	14.9274	13.481	14.8193	14.175	14.5666
DBT	14.508	13.9048	12.5702	13.1637	14.1144	14.6807	12.0417	13.2111	13.3798	14.409	13.0452	12.6045	14.7971	13.3184	12.1789	14.1416	14.0458	13.6723	13.9474	13.426	13.6829	13.0319	14.4705	14.1446	13.418	12.2416	13.1829	12.9249	13.6301	13.0962	13.3762	13.6862	13.2949	14.0212	14.9351	14.5477	14.0896	13.8956	16.1454	11.3897	13.9533	12.7847	13.1657	14.0082	13.8027	11.6826	13.8341	13.5228	13.1306
ITGAM	14.3848	15.0387	15.5129	13.6582	16.5638	14.3382	15.4736	17.1519	15.1482	13.6426	14.5678	15.4569	15.3474	14.1542	16.6346	14.7301	14.4963	14.2007	14.0697	15.3358	13.1265	14.5789	14.1557	13.308	14.1865	13.5208	15.0103	14.0446	14.5748	16.9604	14.7443	15.8428	14.7955	14.7742	13.1954	14.9939	14.2652	13.2832	10.7997	17.4412	15.4013	14.6637	15.1868	14.1341	14.0622	17.224	14.7585	14.6135	14.3756
PYGB	16.1321	15.4145	14.7998	16.9798	14.5275	15.0284	14.9503	15.081	15.7998	15.3549	15.0926	14.2236	16.1725	15.2926	14.8925	16.1171	16.4266	14.4512	16.564	13.8159	13.8903	14.4406	15.6102	14.936	14.4056	14.2853	17.2943	15.3143	14.7144	15.2479	15.0452	15.8374	14.7719	14.033	15.6349	14.4815	16.5852	15.3491	13.8206	15.7147	17.1134	14.761	14.8938	16.4708	16.5703	14.6681	15.5501	15.4521	15.0325
RALA	15.1487	14.9771	13.7062	14.6592	14.5722	14.2545	15.3894	14.3841	14.7553	14.9765	14.6197	13.9527	15.083	12.4463	14.1626	14.3602	15.6641	13.1788	15.7252	14.5599	13.9585	13.6249	14.1148	13.8711	15.0473	14.0036	14.1404	14.8845	13.4048	14.1697	14.8627	14.5369	15.4013	14.6363	14.9217	14.5692	15.3017	15.6211	13.3428	14.5781	12.8501	15.0739	14.8569	15.0012	14.3936	14.7113	15.8407	14.1088	14.5027
RALB	15.5662	15.2994	14.3233	14.9246	14.6261	14.446	14.6797	14.4904	14.8686	14.8132	14.4911	14.6714	15.3044	14.1453	14.8908	14.9292	15.7768	14.2592	15.158	14.8444	14.1949	14.0421	15.2776	14.9971	14.8082	14.6726	15.3057	15.5097	14.3746	14.9171	14.0655	14.2269	15.4138	15.2275	15.1909	14.3257	14.8876	15.4744	15.5588	15.398	15.6398	14.7893	14.1209	14.8503	15.045	14.9142	14.7628	14.6208	14.3636
BCR	13.7381	13.4472	10.8855	13.7425	11.3434	14.0622	13.6449	14.0454	13.0837	13.4556	12.6612	12.6793	12.3451	13.4617	13.7541	13.3455	12.1303	13.6339	14.7874	13.6617	14.2921	12.8237	12.6735	14.445	13.6395	13.8872	13.4891	13.0912	14.2807	13.911	11.75	12.9956	14.116	13.7722	13.3828	13.5203	13.567	12.784	11.7192	14.2686	10.6629	13.4917	13.8313	12.9575	12.5527	12.0434	13.8163	13.652	14.0758
SPTB	12.7843	14.8509	13.8865	12.8795	13.2986	12.8146	12.9146	15.416	14.1394	13.0056	13.1839	12.9058	13.1104	12.8544	13.696	14.0129	12.9492	13.1892	12.8124	11.8949	13.6482	13.5193	12.7633	13.1739	12.7919	12.5049	13.6189	14.1996	12.8043	13.654	13.2805	12.5868	12.6111	12.6467	13.4636	12.6556	13.585	17.224	15.77	13.3075	15.521	13.4064	13.8263	12.6854	12.18	13.8826	13.6562	13.5992	13.3827
LAMP1	16.7628	17.4524	16.6641	16.115	16.1826	15.6067	16.0074	15.7007	16.6005	16.3123	16.5388	16.1641	15.5467	16.1354	16.0333	15.9072	15.5591	16.3019	16.5354	16.4126	15.7167	16.6903	16.0961	15.6991	16.6147	16.7198	16.6702	16.1356	15.8711	16.1786	15.3979	16.3065	16.2422	16.6084	16.5997	16.4892	16.4807	15.5123	17.4405	16.6181	15.0162	16.0538	16.0403	16.0418	15.0125	16.3155	17.042	16.1915	16.564
ACADM	15.5905	15.3347	16.4365	15.914	16.4957	15.7677	15.3497	15.8842	15.8154	16.5402	15.372	16.9758	15.8501	15.2045	15.2944	16.0717	14.4549	15.9757	15.837	15.2414	16.2849	15.6274	15.258	16.6376	16.032	15.7695	13.9533	16.3182	16.6278	16.5461	15.9962	16.0839	15.7979	16.3337	17.1536	15.2246	16.3277	16.6179	14.7996	15.2742	15.8289	15.7177	15.2614	15.3264	15.7689	16.0809	16.6218	15.4627	15.009
TOP1	14.6574	15.6596	15.7467	15.3981	15.4092	14.192	14.9979	14.6703	14.5093	15.3125	16.7864	14.9636	15.633	15.2068	15.3661	14.8791	16.1751	14.0051	14.6024	14.7498	14.4164	15.5963	13.836	13.9039	15.6436	15.4259	14.9695	14.733	15.1938	13.6319	13.6157	14.9322	14.4006	14.8779	14.3527	15.2506	15.3865	14.8139	17.2215	15.0872	16.1417	16.001	14.7254	15.4648	16.1382	13.8783	13.7252	15.6437	15.7255
TOP2A	13.2131	13.8973	14.3069	13.2212	14.3744	12.7055	12.9387	12.9963	13.3381	12.9276	13.893	12.8435	13.3337	15.3366	13.4258	12.8197	13.1171	13.051	12.7772	13.8861	12.7871	13.3364	12.5029	12.8832	12.8885	13.2706	13.5467	13.1984	13.1894	12.9684	12.6026	13.6974	12.7805	12.7295	13.3688	13.2575	13.1892	12.818	15.7829	13.815	14.419	13.2742	12.997	13.354	13.4181	13.8757	13.3598	13.6273	13.8409
G6PD	16.7109	15.3864	15.7311	15.4192	15.917	14.9868	16.0075	16.6821	14.8915	15.572	15.4377	15.428	15.3186	15.6455	16.0305	15.198	14.6806	14.7682	14.7367	15.7753	14.3262	15.9861	15.2312	14.287	15.4073	15.2637	14.8124	14.895	14.9591	16.1771	15.8524	15.8633	15.2723	15.6018	15.4217	15.296	15.2365	15.3787	14.5889	16.4897	15.9372	14.9982	15.4382	15.4551	15.2157	16.3491	15.4563	15.4813	14.8402
UBL4A	14.1069	13.5246	13.3831	13.3772	12.5748	12.3165	12.7925	12.8008	13.9286	13.1852	13.0791	13.558	11.36	12.9585	12.8265	13.8446	11.6483	12.7502	12.9877	13.3769	12.4466	13.262	13.0769	12.8957	13.0433	12.5668	13.4728	12.7117	12.4335	12.4928	12.8905	13.5059	12.6013	13.276	12.7769	13.0322	12.8927	13.3002	11.1342	13.2738	11.9459	13.4672	13.4743	11.4976	11.4799	12.0175	12.965	13.121	13.059
PC	8.77812	12.7668	13.3341	13.0784	11.7621	11.1293	12.7995	12.625	13.1549	12.9033	13.0456	12.1849	12.8582	13.5013	12.4756	12.2076	11.9716	11.705	11.5229	11.8726	11.2516	11.5569	12.3677	12.1877	12.8635	12.4591	12.0723	12.6935	12.6246	11.2798	12.6878	12.0046	12.3229	12.8136	13.0838	12.6355	12.9115	14.3173	12.3889	10.6868	11.3634	13.4512	11.8773	13.2326	12.1803	11.8745	11.9344	12.43	13.1708
MTHFD1	16.3479	14.9687	16.2335	15.8688	16.6894	16.3599	16.4173	16.0607	16.4114	16.0254	16.3551	16.0312	15.0944	16.3011	16.0234	16.5847	15.3855	16.247	15.4005	16.3503	17.3308	16.9851	16.5412	16.4235	16.1932	16.0455	15.7268	16.4228	16.2267	15.7439	16.1284	16.5494	16.3351	16.0267	16.4802	16.2849	16.1811	16.0418	15.9315	16.5685	16.5377	16.2377	15.9365	15.4416	15.3458	16.2345	16.1128	16.5574	16.2138
EPX	17.6016	16.1447	16.3785	16.7687	14.5673	16.0556	14.8601	17.8001	16.6932	15.7969	15.3647	16.5968	17.2785	15.8977	16.1	16.4422	16.8943	15.8373	16.3178	18.3905	15.4331	16.9325	16.6832	15.7132	17.0848	15.4032	13.8179	15.8677	16.48	16.644	16.6767	16.0352	14.7455	13.9759	14.5291	15.0735	14.7713	13.0743	15.5076	14.884	17.2667	16.1931	15.3088	17.7429	16.7443	19.2697	16.5016	16.4417	15.6385
IGF2R	14.9582	15.4154	14.5128	14.8887	14.5091	14.2787	14.5041	14.7569	14.7214	14.1059	14.3992	15.3294	15.0713	15.2645	14.5648	16.344	14.7651	14.3845	14.1945	15.3236	14.0546	14.6173	14.5219	14.3685	14.141	14.449	14.6147	14.5046	14.6274	14.821	14.7048	13.922	14.0277	15.1383	13.422	15.0857	14.992	14.8929	14.7496	15.0686	15.0435	13.8214	15.1214	15.7137	15.0028	14.6819	14.3187	14.2124	14.6855
ADH5	15.9432	15.5818	15.6958	15.6661	15.7521	15.2997	15.1588	16.4168	16.0256	16.0745	15.5193	15.1511	16.2183	16.1268	15.4708	15.6362	15.5508	15.8892	15.5516	16.1098	15.467	15.8131	15.9084	15.8443	15.8208	15.9108	15.2704	15.6698	16.3537	15.9219	15.8579	15.7962	15.5291	15.8587	15.609	16.4064	15.143	16.0564	15.3202	15.9273	16.0883	16.277	16.3875	16.4676	16.3109	16.221	15.0529	15.9546	15.712
PRPS2	15.7329	14.999	15.6877	15.8284	15.7853	15.3387	15.2374	15.1604	15.6427	14.9993	16.2579	15.0625	15.4729	15.8262	14.9678	14.9332	15.1482	15.7913	14.754	16.0512	15.2608	14.874	15.4224	14.7172	15.3494	14.7003	15.6093	15.5025	15.2327	14.7804	15.0342	14.9824	14.6349	14.7665	15.8128	15.256	15.0883	14.9262	15.3094	14.464	15.4419	15.7528	15.0185	15.3266	16.2847	15.5464	14.8058	15.6232	15.334
PABPC1	15.9266	16.347	17.0576	16.625	16.6705	16.2152	16.4848	16.5203	17.0479	16.346	16.7901	16.7568	16.5058	16.6608	16.7995	16.8998	16.8412	16.6324	16.2243	17.1472	16.2047	16.6378	16.3237	16.3172	16.4776	16.3598	16.8623	16.3575	16.6419	16.3196	16.4833	16.9464	16.6838	16.3043	16.4124	16.737	16.5399	16.1813	16.5564	16.2826	16.7851	16.8837	16.8326	16.5819	16.9157	16.3123	17.0043	16.9204	17.1147
PCNA	14.5339	14.9319	14.7666	15.2778	15.8944	14.1828	15.4182	14.435	15.1883	14.4958	14.9787	15.237	14.3739	15.1145	14.8509	15.4861	14.3591	14.3961	14.4275	15.5602	14.4201	15.1707	14.057	14.1037	14.5473	14.8102	15.8253	15.6376	15.1294	14.2812	14.3838	15.2449	15.3631	13.6482	14.3981	15.4518	15.2475	13.7299	15.5829	14.3022	15.6946	15.6495	14.0642	14.4075	15.5368	14.5023	15.0536	15.5123	15.096
COX6A1	13.0459	12.8435	12.6139	14.9842	12.2686	12.9172	13.512	12.6287	13.6886	14.1718	13.7012	15.4172	14.1434	13.0541	12.8845	14.2599	13.3732	14.2233	14.3682	13.2326	13.7911	13.6477	14.9919	15.3609	14.5455	14.5663	14.7863	13.9244	13.6504	15.3692	13.6909	13.5449	13.6895	13.9233	12.6234	11.4258	13.4822	15.6921	15.5689	12.925	12.92	15.3031	12.8489	13.4842	13.553	12.9216	13.7333	13.9612	12.8186
HARS1	15.2254	14.9719	15.5172	15.4993	14.9017	14.9452	15.0227	14.7634	15.4588	14.9856	14.8433	14.9716	14.2399	14.8165	15.4702	15.6601	14.4472	14.6382	15.0631	15.0245	14.6512	14.6286	15.1518	14.8688	14.9438	15.1128	15.2802	14.6982	15.0854	15.2495	15.0868	15.1423	14.6156	15.2631	15.0439	15.3439	15.6018	15.088	14.6787	15.1432	14.6868	15.0145	15.4072	14.7722	14.6816	14.5505	14.7952	15.7135	15.1348
COL6A1	18.3518	19.0709	17.4224	17.9324	18.9586	18.2961	19.5233	20.268	17.6622	18.1314	16.3157	18.2805	17.016	17.5792	18.6429	18.5212	18.2969	18.333	18.2673	17.7387	18.8708	18.2972	19.1068	19.1308	19.4364	17.9409	18.2915	19.3424	18.2603	19.7264	19.6386	18.4024	18.6475	18.1699	18.6005	18.5229	17.6775	20.5288	17.3666	19.1725	18.4435	19.593	18.5206	17.8453	18.3926	19.3059	19.6514	18.6713	18.644
COL6A2	18.611	19.2844	17.3254	18.2022	19.6831	18.3945	19.6057	20.4363	17.9148	18.4673	16.9919	18.4432	18.4107	18.03	18.3936	18.8922	18.4778	18.4785	18.5259	17.9895	18.8651	18.4419	19.3089	19.2669	19.6763	18.2653	18.556	19.6564	18.9959	19.7681	19.7248	18.5976	19.1683	18.5676	18.853	18.8496	17.8936	20.6364	18.4122	19.0399	19.1503	19.832	17.8181	18.584	19.1523	19.9684	19.6889	18.2042	18.5249
COL6A3	17.543	18.3036	16.2675	17.1828	18.2004	17.3539	18.3778	18.7541	16.9779	17.241	16.1742	17.5541	15.9227	16.7793	17.4808	17.1925	16.8926	17.1919	17.513	17.4282	17.6916	17.6065	17.9219	18.0169	18.1408	17.1232	17.3684	18.2945	18.0541	18.1896	18.3015	17.5325	18.0032	17.7765	17.9684	17.7226	17.2538	19.1035	16.2242	17.8496	16.1752	19.0653	16.964	16.5101	16.877	18.6614	18.8494	17.4537	17.8296
SLC25A4	14.8241	15.4821	15.6145	14.9751	15.5747	15.5289	15.0495	15.3091	15.4506	14.1394	14.8259	14.7454	15.3915	15.5896	14.8128	14.9143	15.1009	15.516	15.2132	14.4637	15.5878	14.3808	15.1375	15.3479	14.6772	14.7887	15.0902	15.0876	15.1359	15.1801	15.5312	15.1378	14.7612	14.7381	15.2024	14.6286	15.2875	16.8428	16.0426	14.703	15.1689	15.3381	15.4674	15.1181	14.8113	14.8832	15.2868	14.982	15.2729
SLC25A6	17.4861	18.2845	17.7603	17.475	16.8009	17.2951	17.3218	16.9458	16.1416	17.5651	17.9682	17.2161	17.6501	17.5451	16.6087	17.3787	18.3403	17.7431	17.8559	17.6331	17.1091	17.4783	17.2719	17.2571	17.3911	17.7189	16.9671	17.6442	17.7765	16.7842	17.2605	17.5443	18.0355	17.4526	17.7509	17.5711	18.5647	18.3185	18.3162	16.3919	18.854	18.2054	17.6695	17.4506	17.4454	17.1652	17.5115	17.3798	17.2849
IMPDH2	13.6187	12.9828	14.1625	13.1312	14.8095	13.5182	13.4141	13.7062	14.0504	13.4879	13.4579	13.8706	13.0877	14.5593	13.483	14.2151	13.2564	13.8013	13.3696	14.6691	13.1659	13.9087	13.402	13.0853	13.7122	13.8127	13.9297	13.2462	13.9682	13.9221	13.8649	14.4929	13.4585	13.2758	13.3889	13.719	13.432	13.7943	15.7495	14.0926	13.2052	13.3959	13.3977	13.6614	13.0749	14.0791	13.8354	13.792	14.4971
TPR	14.7914	14.0969	15.0644	14.4603	15.5676	14.8729	14.767	14.951	15.4814	14.9888	15.3905	15.0895	15.9093	15.483	14.9656	15.264	14.9252	14.8707	14.8587	15.1709	15.3699	15.0245	14.8461	14.8153	14.8776	14.9664	14.9686	15.094	15.2097	14.7358	15.1493	15.3718	14.9033	15.1111	15.028	15.0409	15.2364	15.2657	14.1403	15.1797	15.8199	15.4303	15.0383	14.9998	15.685	14.6158	15.3732	15.1602	15.5282
CKB	13.8937	16.0832	14.6867	18.5409	14.6357	20.0529	15.5357	17.0408	14.7883	17.612	15.0399	16.9881	19.1024	18.3762	14.7015	14.321	17.9296	17.4613	16.708	13.7585	15.1838	14.4774	19.6349	19.7761	17.3674	15.6375	19.543	17.7536	16.5416	15.1845	16.3571	15.092	15.4356	14.4853	17.7757	15.2799	16.9271	19.4614	18.1774	14.5915	15.6551	14.9719	14.1311	18.6434	16.7272	18.0219	15.6838	16.4553	13.6013
ANXA3	17.2339	16.7525	16.7486	16.2855	18.021	17.4991	17.495	18.2407	17.557	17.6294	17.1626	16.9571	16.9576	17.6618	17.8428	15.5101	16.3865	17.2413	17.1523	17.6524	16.9596	17.0607	17.312	17.2482	16.4265	16.675	16.9983	16.582	17.3245	17.9218	16.8235	17.2426	17.0716	17.567	16.485	16.8423	16.8975	17.0062	16.8152	18.1426	16.0311	16.5005	16.9182	17.0516	16.2123	17.9054	15.6345	15.6313	17.2485
CKMT1B	15.38	17.9816	14.8474	16.9959	15.9831	17.3463	15.7936	15.6348	15.8957	16.8593	16.6418	17.6287	16.5443	15.2993	16.2731	17.3925	16.8929	17.3391	16.9914	16.8688	16.4989	15.4908	17.2105	17.6249	17.4776	16.0176	15.8989	16.3518	16.5176	15.1469	15.7236	17.4975	16.049	16.3152	16.6948	16.8471	17.5417	16.671	16.6255	16.0878	16.4024	17.4254	16.5482	17.2559	17.1237	14.9963	15.9845	16.5992	16.4584
BCKDHA	12.2792	12.6799	12.4369	12.0268	12.8864	13.2733	12.4135	12.0435	12.9564	12.6037	13.0719	13.067	13.2923	12.6466	12.5232	12.8074	12.8819	12.1608	12.4815	12.7406	14.0129	13.1587	13.6154	13.9821	13.071	13.2758	12.0615	12.3997	13.3481	11.5724	12.5281	12.7486	12.6233	13.7777	13.8114	13.1567	12.8009	13.0736	12.2921	12.3828	12.5854	13.0192	12.9287	12.104	12.8651	12.3714	13.3803	13.036	12.9821
RNASE3	17.1667	16.0705	15.7151	16.8851	16.3191	16.7413	16.0881	17.8884	17.0871	15.8889	16.0925	16.9985	17.7196	16.1838	16.9116	15.9733	17.338	16.4614	16.6984	18.1278	15.9023	17.0105	16.9183	16.2958	17.3796	15.82	14.2822	16.3878	16.2897	16.3336	16.5155	15.9886	15.145	15.9221	15.3941	15.3848	15.5235	14.1536	15.3258	15.5803	17.403	16.0209	14.0501	16.5665	17.2099	19.5081	15.5707	15.9256	15.653
ACTN1	16.3321	16.599	16.4659	15.8029	16.6479	16.293	17.05	17.3525	16.3969	16.2293	15.2403	16.237	16.1782	16.0675	16.3248	16.2068	16.4437	15.9295	17.1194	16.6492	16.6473	16.2273	16.5697	15.9527	16.3057	16.3263	15.8195	17.1694	16.4752	17.1691	16.6485	16.4243	17.4713	16.8436	16.5917	16.4314	15.5836	17.9053	15.6355	16.4261	16.1918	17.1131	16.0952	16.3149	16.1176	16.8955	16.6833	16.0441	16.8294
ACE	13.311	14.219	13.1371	12.9629	12.979	11.7653	13.1603	13.9419	12.5055	12.2537	12.2772	12.5366	12.2765	13.0801	13.249	12.8536	13.5234	12.2253	12.3191	12.7487	12.6561	13.2936	12.4812	12.5005	12.7746	14.2128	12.8885	12.7587	12.1752	14.3674	13.4838	12.8018	13.6242	12.3405	14.1512	13.0035	12.865	11.4898	10.6031	13.6442	12.6357	13.227	12.3594	11.6763	11.311	13.3302	13.7191	13.2607	12.724
CDH1	16.7225	15.8676	15.8104	16.4406	15.6056	16.7036	16.2238	15.1706	16.3125	16.752	16.7619	16.5981	16.8619	16.5466	15.7883	16.9876	16.5518	15.6355	16.2192	15.9731	16.1201	16.1958	16.2264	16.7	16.3654	16.2979	16.9019	16.4204	16.0369	15.309	15.6941	15.476	16.0524	16.4494	16.6202	16.5493	16.2747	15.9493	16.8637	15.8384	16.6697	15.9181	15.9113	16.7247	16.3609	15.47	15.931	15.8909	16.096
SRC	15.1854	15.0001	15.2544	14.587	15.2057	15.0864	14.9234	15.4708	15.2251	14.8794	15.5817	14.7803	15.6988	14.3848	15.1265	15.0696	16.327	14.4433	14.5754	15.0148	15.0368	15.0928	14.6418	15.0913	15.3183	14.6073	15.2688	14.1433	14.9609	15.4639	14.355	15.129	14.6205	14.4267	14.9866	14.9753	15.3215	13.9958	15.4944	16.2456	15.5247	14.5416	15.2911	15.6564	14.9172	15.4907	15.0879	15.0081	14.7262
PEPD	15.9281	14.6285	15.426	14.9632	15.1665	15.2428	15.7555	15.4214	14.8162	15.2362	15.82	14.59	15.4823	15.2042	15.3538	14.5839	15.839	15.0743	15.4623	15.9631	15.7253	15.439	14.9855	15.1702	15.6176	15.3993	14.9639	15.3958	15.439	15.3245	16.6002	15.4632	17.087	14.8256	15.3827	16.3914	15.1328	15.6655	14.1583	14.5434	17.1652	16.3746	15.0675	14.9408	14.891	15.2829	16.2393	14.9223	15.6237
XRCC6	16.043	15.91	16.4377	16.305	16.2081	15.8532	15.6156	15.7368	16.1509	16.2194	16.4356	16.0575	16.1163	16.614	16.1499	16.001	16.1635	16.1643	16.1753	16.3538	16.2657	16.324	15.9776	16.3574	16.4349	16.7702	15.7581	16.3361	16.4853	16.0207	15.7162	16.2786	16.2221	16.3896	16.3806	16.5518	15.7482	15.8383	17.3649	16.3544	16.1312	15.9332	15.9892	16.4441	16.3506	16.0392	15.8877	16.3169	16.3425
XRCC5	16.9153	16.7012	17.1416	17.0281	16.9229	16.694	16.2586	16.3616	16.442	16.6099	17.1797	16.6304	17.3077	16.9031	16.5091	16.8044	17.4082	16.7485	16.7572	16.6192	16.6798	16.8369	16.3128	16.7062	16.8308	17.1893	16.4943	16.8797	17.0563	16.4687	16.3792	16.7077	16.8887	16.7508	16.768	17.3637	16.2564	16.6323	17.8504	16.5979	17.1642	17.2518	16.4661	17.2021	17.6064	16.7642	17.1523	16.0414	16.6317
COX4I1	15.7577	16.7526	16.4846	16.6315	16.1001	15.9665	15.8423	15.718	16.4727	16.6267	16.1579	17.2225	15.9969	16.3367	16.018	16.9985	16.1478	17.0738	16.7121	16.4914	15.1364	16.37	16.9688	17.0709	16.8784	16.8312	17.2036	16.5058	16.2284	16.0276	16.5526	17.1712	16.6718	16.3498	15.9082	16.1823	17.5867	18.1069	16.0727	16.5016	16.2239	17.1059	16.3016	16.5487	16.3886	16.0164	17.027	17.1385	16.5736
IFI30	12.2679	11.6794	11.9033	12.4161	11.9319	10.4006	12.7705	11.1927	11.1073	9.90376	10.4182	12.6751	11.4559	11.9998	10.453	11.1059	11.2434	11.7562	12.3484	12.6003	9.65303	13.4704	12.2559	12.4032	11.4004	11.5219	11.5976	11.7119	11.098	13.1196	9.29919	11.1058	11.7094	10.994	11.3787	12.2911	10.9538	10.4707	12.2836	13.6068	11.9128	10.9182	10.9676	11.3167	11.3155	13.5969	12.4275	10.9116	12.0028
LAMP2	15.866	13.8397	15.1812	14.4777	13.8782	15.4679	15.3656	15.0135	15.2795	14.6163	14.8471	14.2601	16.0372	14.299	14.4011	15.7353	14.252	14.3502	14.2903	14.7477	14.8039	14.6518	14.0881	14.3661	14.5864	14.8155	15.3473	14.7137	14.0493	14.4545	15.0868	14.7264	15.3327	14.4646	15.1419	14.8557	15.0519	14.9239	15.8332	13.6758	15.1964	14.1217	14.8472	15.05	15.4565	15.4238	14.018	14.508	14.3385
RNH1	15.5915	15.75	15.8521	15.8837	15.8614	16.046	16.2394	16.2966	15.9759	16.0321	15.8779	16.1825	15.6517	15.9277	16.1276	16.1558	15.3176	16.3105	15.6147	16.2171	16.1053	15.5895	15.3892	15.5424	15.8862	15.7121	16.1942	15.6854	15.7731	15.9758	16.0244	16.0247	16.2032	16.4266	16.1882	15.7135	15.7047	16.3638	15.0311	15.872	15.7426	15.0462	15.6806	15.4615	15.4832	16.7389	15.8337	15.8649	16.0771
CYBA	15.628	15.8111	15.0605	16.2331	16.1604	15.4597	15.8334	15.7266	13.9839	14.8702	13.4785	16.1363	13.96	15.1478	16.0046	13.8803	15.1699	15.1338	14.875	14.4488	13.6636	13.3839	15.2246	14.848	13.394	14.4054	14.3431	15.5158	15.9639	15.5733	9.12248	14.4388	15.2073	12.8058	12.6192	14.9268	14.9452	14.4884	15.2778	15.744	9.82888	14.9008	15.2037	15.2669	15.2178	14.143	13.9211	13.4063	15.1329
CFTR	14.5565	14.9545	16.7956	16.0707	16.3608	16.1829	16.2074	15.2153	16.5485	15.9914	16.3693	15.9833	16.4116	15.2373	16.4736	16.6183	16.2752	16.2902	16.0366	16.0779	14.2723	16.7443	15.6892	16.1634	15.4204	15.6798	16.9271	15.1187	16.097	17.0141	15.0612	15.418	13.7796	14.612	14.2806	15.7296	14.8424	14.9256	14.5788	15.7185	16.8606	16.9393	16.4489	16.2798	14.811	17.2383	16.4753	14.6871	16.202
VCAN	17.0469	15.5898	14.8316	14.1072	14.5959	14.1504	16.1333	16.0277	15.0712	16.1198	13.0803	14.9155	14.2038	13.7054	14.6227	15.3167	14.6142	13.9924	16.5904	17.2232	14.8507	14.2587	15.3895	13.4892	14.8658	15.1728	14.2188	16.7807	15.6807	14.9567	15.7328	14.8647	16.7317	16.1517	15.3538	15.1144	14.9572	15.9949	15.6755	14.7384	15.1162	17.2463	15.1181	15.4239	16.5588	15.2754	15.8633	14.1926	15.0442
EEF2	18.1423	18.2609	18.6769	18.1772	18.2039	18.0749	18.373	17.9573	17.677	18.0713	18.2132	17.9578	18.7406	18.3302	18.7561	18.7563	18.2435	18.2147	17.9538	18.3174	18.1733	18.2268	18.0795	18.1076	18.0847	18.2217	18.1277	17.756	18.1582	17.9341	17.7852	18.0161	17.9521	18.3499	18.1542	18.7782	18.5353	18.0229	18.4466	18.0377	17.0607	17.8449	18.4217	18.5305	18.7698	17.8455	18.1349	18.6491	18.4053
PDIA4	17.972	16.4083	15.7979	16.9577	17.1349	17.1705	17.6217	16.009	16.7805	16.6976	17.0379	16.9085	17.3651	16.5968	16.6578	16.5232	16.9213	16.4282	17.0249	16.9619	17.3309	16.651	16.6561	16.8095	16.225	17.3229	16.7491	16.786	16.4239	16.8245	16.7178	16.5273	16.552	17.0099	16.9501	16.7288	16.6433	15.6117	17.1024	16.6007	17.7783	17.2306	17.3959	17.2472	17.4423	16.9209	16.76	17.4683	16.3741
C6	12.1073	13.7566	12.7268	11.9943	15.6234	12.3797	13.3778	14.172	13.8389	11.8828	11.7465	12.8596	11.3778	11.4221	13.0519	12.0494	13.3717	11.8439	12.1817	13.5402	11.3678	13.1703	12.2597	12.5865	12.8116	12.3303	12.6272	12.445	12.2383	14.7421	13.1973	13.1416	12.3624	12.5359	11.9226	12.585	12.6327	13.7611	11.5796	16.0768	13.1516	12.4635	13.084	12.3342	12.7274	15.504	13.3904	13.0687	12.4293
P4HA1	13.9501	13.5696	12.7602	13.6927	14.66	13.2461	14.3453	14.3262	13.8746	13.0432	12.5216	13.5469	14.4793	13.8779	13.8602	13.2606	13.3057	13.4599	14.1682	14.0185	12.4664	13.6108	13.1881	13.2907	13.0606	13.1745	14.2954	12.7764	12.849	14.6751	14.0523	13.4641	14.1697	13.0612	13.1093	13.0636	12.7922	13.1255	9.32777	15.4345	14.8151	13.4338	13.8871	13.6405	14.1131	14.6381	13.4613	13.735	13.7668
CEACAM1	15.714	16.5197	13.8862	15.097	15.1756	15.6481	15.9982	14.9522	16.6897	14.7392	14.8271	14.9675	16.5728	14.7969	15.5796	14.1342	15.7801	14.2891	15.5822	15.8064	17.4323	14.8493	15.429	15.1871	15.4375	15.3817	15.4942	15.9345	15.2681	15.4057	15.0059	15.1227	16.4219	15.3832	15.1374	16.1231	15.6212	16.8193	15.8141	15.0977	15.6591	15.031	13.4461	15.0496	16.0264	15.0603	16.7369	15.0878	15.1608
TPT1	15.676	14.982	14.9868	14.4152	14.5192	13.674	14.3597	14.2485	14.7302	14.9843	15.1485	14.7363	15.4461	14.9474	14.9117	14.5614	15.0217	14.3217	14.7616	15.2341	13.9903	15.6352	15.1209	14.081	14.6807	14.9027	14.7563	14.6403	14.3584	13.9664	14.2721	14.6967	14.3797	15.3734	14.2543	15.4732	15.3475	14.2298	14.9703	13.8916	14.5952	13.6839	14.8844	14.6712	15.4434	14.0049	14.6739	14.9331	14.4806
ALAD	13.4017	12.0378	13.5285	12.9582	12.8828	13.3552	13.9831	13.5022	13.7245	13.4472	12.8122	13.0946	12.2623	13.2697	13.6993	12.9887	11.5131	14.4462	13.9213	12.3427	14.0337	13.5548	13.548	13.6528	13.2229	13.0195	13.7624	12.9412	13.2143	14.4118	13.3091	13.3522	14.0393	13.684	12.5852	11.7443	12.0651	14.109	13.9287	12.3514	11.2771	13.8964	12.5602	12.8167	13.2276	14.3822	12.8203	12.6239	12.6805
F3	11.0888	12.7637	12.0074	12.3377	11.7528	13.4456	13.7022	14.5148	12.6589	12.7834	11.6432	13.7928	12.7152	11.8615	10.7584	13.1797	14.0172	12.8776	12.1098	12.5303	11.6427	12.6758	12.3608	12.9218	12.3078	13.1504	13.2596	13.9923	11.8314	12.8799	11.7042	13.7007	13.7339	11.9771	11.6232	12.0081	13.6987	12.9017	13.285	12.2345	13.0457	13.4387	11.422	12.0027	13.3931	13.7157	11.6162	11.9461	12.0225
PRG2	19.1372	17.6402	18.3732	18.2366	15.1277	17.6443	16.2059	18.6755	18.2327	17.1355	17.1259	18.4374	17.8546	16.7431	16.876	17.8527	17.4635	17.501	17.6924	20.0717	16.6238	17.7396	17.7981	16.8187	18.5668	16.512	15.0657	17.143	17.7674	17.3395	16.645	17.2633	15.0548	15.3518	15.4001	15.8786	15.6946	12.6228	16.1765	14.4909	17.8465	17.5338	15.7227	18.3128	17.0199	20.892	17.0876	18.1211	17.105
HLA-E	11.7795	12.1512	10.7376	10.6139	13.1238	12.1197	14.7324	15.192	13.6287	10.3357	11.7481	13.7786	11.3668	12.5698	12.3829	11.5526	13.4959	12.3473	10.4986	12.5402	11.2682	11.6517	11.5963	12.6442	14.5112	12.9304	13.0893	11.7247	10.7711	12.8098	14.8724	12.9589	11.1523	13.0578	11.6912	11.662	9.45386	13.1822	12.7062	14.1499	11.7571	7.8956	13.948	11.715	12.223	12.7112	12.2515	12.9456	13.4526
LCP1	17.4637	17.5589	18.4041	17.9669	18.3717	17.7659	18.1408	18.7652	17.5825	17.7276	17.9281	17.7764	18.1638	18.1317	18.786	17.73	18.4813	17.9491	17.8911	17.9312	17.6431	18.1148	18.1974	17.9643	18.2531	17.6501	17.3948	17.7023	17.6874	18.85	18.2211	18.2122	18.0268	17.6803	17.1608	19.0626	17.2085	16.3776	16.8226	18.6712	17.68	17.3339	18.173	18.2865	17.9255	19.2342	18.121	17.5772	17.6753
PLS3	15.9346	16.4068	15.5604	15.8754	14.9236	15.7101	16.1636	15.6096	15.3821	15.8037	15.6261	15.1734	15.4144	15.6497	15.8149	15.177	15.2445	15.6345	15.9144	15.8543	15.2432	15.5815	15.99	15.4507	15.6255	15.1333	15.3942	15.6919	15.5089	15.3993	15.7512	15.4189	16.1461	16.3588	15.7127	15.6856	15.6734	15.4164	14.7955	14.5594	14.9229	15.6236	15.7112	15.1117	15.7982	15.7228	15.8379	15.7252	16.0348
APEH	15.1773	14.9214	15.4417	16.0684	15.5584	15.3759	14.9348	15.3609	15.5298	15.9135	15.4107	15.3019	14.8028	15.8244	14.4797	15.631	15.0439	15.5391	15.1313	15.5844	15.4642	15.2665	15.5372	15.4914	15.1175	15.6289	15.665	14.8637	14.7798	15.4431	15.4249	15.2481	15.1218	15.2509	15.7834	15.8254	15.332	14.9893	14.0048	14.3762	15.5633	14.8532	15.3399	14.6241	14.7362	15.1745	15.3812	16.0335	15.3716
ETFA	15.7217	15.9518	14.0524	15.5175	15.1455	16.2069	15.2397	15.0374	15.6711	15.1493	15.6026	15.9806	15.0443	15.5384	15.0206	15.7924	14.647	15.5786	15.7913	15.2212	16.1531	15.2567	15.3106	16.2516	15.6814	15.7644	15.3574	15.1701	15.5801	14.6326	15.2175	15.5754	15.2208	15.3531	16.1702	14.3457	15.6834	16.7502	15.4361	15.2844	15.4892	16.0392	15.0433	14.2411	15.4262	15.2971	14.789	15.9326	15.6033
GYS1	12.4323	14.1675	14.4481	13.0755	14.5765	14.0538	13.5996	14.6241	13.85	13.2308	13.8841	13.3557	14.3162	13.882	14.0199	13.6913	15.03	12.8002	12.7782	13.7975	14	13.3017	12.9979	13.6576	13.1842	14.0411	13.6483	12.6768	14.0299	14.3461	13.6046	14.0329	12.3984	13.9355	14.0453	14.1659	14.081	13.4723	14.5246	15.1769	14.667	13.2778	14.2746	14.2206	14.4943	14.6544	13.4485	14.1863	13.4622
PRKAR2A	14.397	13.8563	13.5453	14.5838	13.7493	13.836	13.6339	13.785	14.1881	14.162	14.0723	13.8086	14.0844	14.0974	13.2444	14.4485	14.6597	14.0685	14.4371	14.2062	13.8783	14.081	14.5886	14.5007	14.5464	14.3794	13.9111	14.2717	14.4093	13.7554	13.8191	14.0766	14.563	14.1159	14.6366	14.3537	14.1249	14.2291	13.815	13.3893	14.2972	14.2672	13.5447	14.8678	14.4287	13.4644	14.5495	14.2194	14.3073
SLC5A1	13.5723	15.6399	13.1464	11.3728	14.6534	11.8048	13.4912	13.3188	12.4917	13.3026	12.1268	12.7899	12.8264	13.5389	13.1079	12.294	12.9542	13.1431	13.1637	13.3916	11.9085	13.0068	12.2869	11.8002	12.0054	12.6617	12.5724	12.5728	11.7073	11.5421	14.4466	12.3097	14.1921	14.0132	14.3618	12.9341	13.441	11.58	16.2734	12.2787	13.6199	13.1487	11.9188	13.7689	14.03	12.0244	13.6934	11.654	11.6895
ENO3	18.5026	16.8813	17.6604	17.9583	18.3028	18.4248	18.7477	18.6623	18.6397	17.9669	18.3869	18.6429	17.9921	17.5709	18.4854	19.0082	17.6334	18.5157	17.6227	19.1753	18.2034	17.5573	18.124	17.8964	17.4831	16.8878	18.3125	17.4193	18.3266	17.849	17.7234	17.196	18.2647	18.3039	18.6121	17.2563	18.2556	18.3618	18.1851	17.0952	17.9883	18.1205	17.4043	17.9704	18.3048	18.0139	17.5016	16.9933	16.7139
GTF2F2	14.0807	14.1351	14.5315	14.5455	14.4764	14.4173	14.3036	14.298	14.4805	14.7685	15.1645	14.3781	14.9756	14.616	14.5493	14.6064	15.2811	14.5189	14.823	14.7624	14.5634	14.8854	14.4719	14.1981	14.6973	14.9051	14.4358	14.7138	14.2324	14.227	14.6429	13.7565	14.9751	14.5024	14.4246	14.6467	15.114	13.8428	15.585	13.7652	14.3891	13.9671	14.3831	14.9557	14.8058	14.0041	14.8867	14.4807	14.9334
CD59	12.8475	14.2168	13.1595	13.9879	12.5801	13.1645	14.1366	14.0286	12.7635	12.8722	12.4641	13.5492	12.9335	12.3144	14.21	11.5292	11.3374	13.1214	11.8654	12.7026	13.4188	11.9314	12.1123	12.5267	13.1674	12.4053	12.5644	12.5944	11.941	11.6832	12.2225	12.0182	12.8135	12.9913	11.6443	12.214	13.0178	13.3427	14.0992	12.4597	13.3784	13.5144	12.1777	13.268	13.2172	12.7907	12.629	12.3793	12.2722
[truncated: 3,891 more rows]
[truncated: 357 more columns]
