# Supplementary material for: Proteomics of colorectal tumors identifies the role of CAVIN1 in tumor formation and progression
Source: Research Square preprint supplement (doi:10.21203/rs.3.rs-3817695/v1), 2024-01-11
Supplement: Supplementary file 3 [file 62387bf0e18728e877f5487a.xlsx]

## Sheet: 1st COHORT
ID	OrderID	Biopsies_ID	Digestion	Batch	Cohort	num_biopsies	Gender	Age	MSI	Stage	Tumour_loc	RFS	RFStime
X354_1st	354		PAC	8	1st	1	0	36	MSI	III	8	0	4604
X219_1st	219		PAC	5	1st	1	0	55	MSS	III	3	0	6638
X1_1st	1		In-sol	1	1st	1	1	89	MSS	III	7	1	1040
X335_1st	335		PAC	8	1st	1	1	65	MSS	II	8	0	4312
X332_1st	332		PAC	8	1st	1	1	59	MSS	II	9	0	4240
X179_1st	179		PAC	4	1st	1	0	56	MSS	II	6	1	581
X13_1st	13		In-sol	1	1st	1	1	72	MSS	II	7	0	4086
X14_1st	14		In-sol	1	1st	1	1	53	MSS	II	7	0	4068
X218_1st	218		PAC	5	1st	1	0	73	MSI	III	3	Exclude	Exclude
X62_1st	62		In-sol	2	1st	1	1	64	MSS	II	5	0	3885
X181_1st	181		PAC	4	1st	1	1	85	MSS	III	7	1	1568
X15_1st	15		In-sol	1	1st	1	0	53	MSS	III	7	0	3732
X220_1st	220		PAC	5	1st	1	0	57	MSS	III	7	0	5755
X16_1st	16		In-sol	1	1st	1	1	41	MSI	III	2	0	3620
X221_1st	221		PAC	5	1st	1	0	55	MSI	III	7	0	5677
X50_1st	50		In-sol	2	1st	1	0	80	MSS	III	2	0	4635
X17_1st	17		In-sol	1	1st	1	0	58	MSS	II	7	0	3568
X51_1st	51		In-sol	2	1st	1	1	43	MSI	II	7	0	3567
X213_1st	213		PAC	5	1st	1	0	63	MSS	II	7	1	848
X223_1st	223		PAC	5	1st	1	0	58	MSI	III	1	0	5592
X183_1st	183		PAC	4	1st	1	1	68	MSS	III	1	1	421
X2_1st	2		In-sol	1	1st	1	1	66	MSS	II	1	1	1685
X167_1st	167		PAC	4	1st	1	0	80	MSI	III	2	1	228
X178_1st	178		PAC	4	1st	1	1	79	MSS	II	2	1	1150
X224_1st	224		PAC	5	1st	1	0	71	MSS	III	7	0	5521
X52_1st	52		In-sol	2	1st	1	0	63	MSI	II	4	0	3422
X222_1st	222		PAC	5	1st	1	0	76	MSI	III	1	0	1388
X363_1st	363		PAC	8	1st	1	1	68	MSS	II	8	0	4423
X347_1st	347		PAC	8	1st	1	0	64	MSS	III	9	0	3351
X3_1st	3		In-sol	1	1st	1	1	64	MSS	III	7	1	1465
X365_1st	365		PAC	8	1st	1	1	57	MSS	II	8	0	3282
X4_1st	4		In-sol	1	1st	1	1	57	MSS	II	7	1	1101
X338_1st	338		PAC	8	1st	1	1	68	MSS	II	9	0	3253
X59_1st	59		In-sol	2	1st	1	1	58	MSS	II	5	0	3248
X63_1st	63		In-sol	2	1st	1	0	59	MSI	II	6	0	3202
X367_1st	367		PAC	8	1st	1	0	60	MSS	III	10	1	776
X18_1st	18		In-sol	1	1st	1	0	71	MSS	III	7	Exclude	Exclude
X358_1st	358		PAC	8	1st	1	0	62	MSS	III	11	0	1519
X359_1st	359		PAC	8	1st	1	0	69	MSS	II	10	0	3156
X353_1st	353		PAC	8	1st	1	1	63	MSS	II	8	0	3150
X368_1st	368		PAC	8	1st	1	0	65	MSS	III	9	0	3155
X369_1st	369		PAC	8	1st	1	1	69	MSS	III	8	0	3390
X19_1st	19		In-sol	1	1st	1	1	55	MSS	II	7	0	3142
X65_1st	65		In-sol	2	1st	1	1	67	MSS	II	1	0	3126
X64_1st	64		In-sol	2	1st	1	1	79	MSS	II	4	0	3508
X66_1st	66		In-sol	2	1st	1	0	71	MSI	II	3	0	3092
X227_1st	227		PAC	5	1st	1	0	68	MSS	III	6	0	1092
X69_1st	69		In-sol	2	1st	1	0	77	MSS	II	7	0	2328
X20_1st	20		In-sol	1	1st	1	0	44	MSS	III	3	0	3021
X68_1st	68		In-sol	2	1st	1	1	94	MSS	II	7	0	1031
X21_1st	21		In-sol	1	1st	1	1	81	MSS	II	7	0	4585
X370_1st	370		PAC	8	1st	1	1	70	MSS	II	8	0	3018
X67_1st	67		In-sol	2	1st	1	0	75	MSS	II	1	0	2188
X22_1st	22		In-sol	1	1st	1	1	62	MSS	III	7	0	2931
X76_1st	76		In-sol	2	1st	1	1	84	MSS	II	7	0	3843
X173_1st	173		PAC	4	1st	1	1	77	MSS	II	7	0	2917
X23_1st	23		In-sol	1	1st	1	0	69	MSS	III	7	0	2906
X361_1st	361		PAC	8	1st	1	1	81	MSS	III	10	0	2911
X357_1st	357		PAC	8	1st	1	0	69	MSS	II	10	0	3787
X24_1st	24		In-sol	1	1st	1	1	56	MSS	II	2	0	2896
X25_1st	25		In-sol	1	1st	1	1	53	MSS	III	1	0	2862
X342_1st	342		PAC	8	1st	1	1	57	MSS	III	8	0	2855
X26_1st	26		In-sol	1	1st	1	0	75	MSI	II	2	0	2856
X71_1st	71		In-sol	2	1st	1	0	83	MSS	III	7	0	2331
X27_1st	27		In-sol	1	1st	1	0	87	MSS	II	7	0	3433
X28_1st	28		In-sol	1	1st	1	1	39	MSS	II	7	0	2832
X29_1st	29		In-sol	1	1st	1	0	74	MSS	III	4	0	4776
X30_1st	30		In-sol	1	1st	1	1	53	MSI	II	4	0	2764
X31_1st	31		In-sol	1	1st	1	1	77	MSS	II	1	0	2771
X32_1st	32		In-sol	1	1st	1	0	72	MSS	II	4	0	2792
X56_1st	56		In-sol	2	1st	1	0	62	MSS	II	7	0	2705
X5_1st	5		In-sol	1	1st	1	1	61	MSS	III	1	1	291
X33_1st	33		In-sol	1	1st	1	1	75	MSS	II	7	0	3092
X34_1st	34		In-sol	1	1st	1	1	70	MSS	II	7	0	2692
X70_1st	70		In-sol	2	1st	1	1	52	MSI	III	1	0	2667
X348_1st	348		PAC	8	1st	1	1	77	MSS	II	9	0	3638
X94_1st	94		In-sol	2	1st	1	0	64	MSI	III	2	0	2659
X6_1st	6		In-sol	1	1st	1	0	64	MSI	II	5	1	251
X184_1st	184		PAC	4	1st	1	0	55	MSS	II	7	Exclude	Exclude
X85_1st	85		In-sol	2	1st	1	0	87	MSS	III	4	0	937
X333_1st	333		PAC	8	1st	1	0	83	MSS	III	9	0	3661
X330_1st	330		PAC	8	1st	1	0	65	MSS	III	8	1	573
X212_1st	212		PAC	5	1st	1	1	74	MSS	II	6	0	2584
X35_1st	35		In-sol	1	1st	1	1	69	MSS	II	7	0	2579
X225_1st	225		PAC	5	1st	1	0	86	MSS	III	5	0	2670
X36_1st	36		In-sol	1	1st	1	0	71	MSS	III	4	0	2567
X336_1st	336		PAC	8	1st	1	1	69	MSS	II	8	0	2542
X53_1st	53		In-sol	2	1st	1	1	30	MSS	III	7	0	2540
X37_1st	37		In-sol	1	1st	1	0	56	MSS	II	2	0	2533
X86_1st	86		In-sol	2	1st	1	1	58	MSS	II	7	0	2505
X331_1st	331		PAC	8	1st	1	1	74	MSS	II	9	0	4174
X334_1st	334		PAC	8	1st	1	1	73	MSS	II	9	0	2472
X7_1st	7		In-sol	1	1st	1	0	73	MSS	III	7	1	49
X182_1st	182		PAC	4	1st	1	0	65	MSS	III	1	1	1420
X174_1st	174		PAC	4	1st	1	1	88	MSS	II	7	0	1948
X38_1st	38		In-sol	1	1st	1	0	76	MSI	III	3	0	3960
X57_1st	57		In-sol	2	1st	1	1	47	MSS	II	7	0	4604
X337_1st	337		PAC	8	1st	1	0	47	MSS	III	8	1	895
X373_1st	373		PAC	8	1st	1	1	73	MSS	II	9	0	2352
X339_1st	339		PAC	8	1st	1	0	56	MSS	II	8	1	369
X54_1st	54		In-sol	2	1st	1	0	76	MSI	II	2	0	2293
X366_1st	366		PAC	8	1st	1	0	61	MSS	II	9	0	2302
X55_1st	55		In-sol	2	1st	1	1	73	MSI	III	3	0	2277
X364_1st	364		PAC	8	1st	1	1	54	MSS	II	9	0	2274
X39_1st	39		In-sol	1	1st	1	1	67	MSS	III	7	0	2226
X40_1st	40		In-sol	1	1st	1	0	74	MSI	II	2	0	2212
X374_1st	374		PAC	8	1st	1	0	37	MSS	III	8	1	1141
X352_1st	352		PAC	8	1st	1	1	69	MSS	III	8	1	1996
X75_1st	75		In-sol	2	1st	1	0	85	MSS	III	7	0	3393
X371_1st	371		PAC	8	1st	1	1	71	MSS	II	9	0	2283
X74_1st	74		In-sol	2	1st	1	1	63	MSS	II	7	0	2105
X41_1st	41		In-sol	1	1st	1	1	71	MSS	III	1	0	2059
X87_1st	87		In-sol	2	1st	1	0	67	MSI	II	3	0	2068
X42_1st	42		In-sol	1	1st	1	0	56	MSS	II	4	0	2003
X73_1st	73		In-sol	2	1st	1	1	60	MSS	III	7	0	1967
X43_1st	43		In-sol	1	1st	1	1	79	MSS	II	6	0	1533
X44_1st	44		In-sol	1	1st	1	0	69	MSI	II	3	0	1971
X45_1st	45		In-sol	1	1st	1	0	64	MSS	III	7	0	1939
X46_1st	46		In-sol	1	1st	1	1	71	MSS	II	7	0	1931
X88_1st	88		In-sol	2	1st	1	0	74	MSI	III	2	0	1888
X180_1st	180		PAC	4	1st	1	1	86	MSS	II	1	1	311
X226_1st	226		PAC	5	1st	1	0	74	MSI	III	5	0	2853
X95_1st	95		In-sol	2	1st	1	1	87	MSS	II	1	0	2236
X8_1st	8		In-sol	1	1st	1	0	60	MSS	II	2	1	121
X89_1st	89		In-sol	2	1st	1	0	59	MSS	III	4	0	1720
X168_1st	168		PAC	4	1st	1	0	70	MSS	II	7	Exclude	Exclude
X81_1st	81		In-sol	2	1st	1	1	56	MSI	II	7	0	2901
X80_1st	80		In-sol	2	1st	1	1	63	MSS	II	1	0	2999
X349_1st	349		PAC	8	1st	1	1	74	MSS	III	8	0	3249
X79_1st	79		In-sol	2	1st	1	1	57	MSS	II	2	0	2887
X82_1st	82		In-sol	2	1st	1	1	71	MSI	III	2	0	2513
X229_1st	229		PAC	5	1st	1	0	73	MSS	III	4	0	2339
X228_1st	228		PAC	5	1st	1	1	70	MSS	II	4	1	359
X350_1st	350		PAC	8	1st	1	1	62	MSS	II	8	0	3164
X78_1st	78		In-sol	2	1st	1	1	75	MSS	II	7	0	3568
X230_1st	230		PAC	5	1st	1	0	54	MSS	III	7	0	2317
X346_1st	346		PAC	8	1st	1	1	59	MSS	II	8	0	3376
X47_1st	47		In-sol	1	1st	1	1	74	MSS	II	7	0	1664
X360_1st	360		PAC	8	1st	1	1	75	MSS	III	8	1	709
X345_1st	345		PAC	8	1st	1	0	69	MSS	III	9	0	1659
X48_1st	48		In-sol	1	1st	1	1	73	MSS	II	6	0	2575
X49_1st	49		In-sol	1	1st	1	0	62	MSS	III	2	0	1628
X9_1st	9		In-sol	1	1st	1	0	70	MSI	II	4	1	112
X231_1st	231		PAC	5	1st	1	0	77	MSS	III	4	0	2240
X344_1st	344		PAC	8	1st	1	1	39	MSS	II	8	0	1590
X166_1st	166		PAC	4	1st	1	1	71	MSI	II	1	1	376
X77_1st	77		In-sol	2	1st	1	1	63	MSS	III	7	0	2212
X72_1st	72		In-sol	2	1st	1	1	62	MSS	II	7	0	2022
X351_1st	351		PAC	8	1st	1	0	47	MSS	II	10	0	2401
X214_1st	214		PAC	5	1st	1	1	64	MSS	III	1	1	560
X343_1st	343		PAC	8	1st	1	1	61	MSS	III	9	0	1516
X131_1st	131		In-sol	3	1st	1	0	70	MSS	II	7	1	1189
X58_1st	58		In-sol	2	1st	1	1	79	MSS	III	4	0	1482
X155_1st	155		In-sol	3	1st	1	1	82	MSS	IV	2	Exclude	Exclude
X372_1st	372		PAC	8	1st	1	1	81	MSS	III	8	0	1442
X60_1st	60		In-sol	2	1st	1	0	71	MSI	III	1	0	1442
X175_1st	175		PAC	4	1st	1	1	45	MSS	III	1	0	1435
X90_1st	90		In-sol	2	1st	1	1	67	MSS	III	7	0	1399
X97_1st	97		In-sol	2	1st	1	0	68	MSS	III	1	0	1393
X91_1st	91		In-sol	2	1st	1	1	70	MSI	III	4	0	1322
X61_1st	61		In-sol	2	1st	1	0	75	MSI	III	3	0	1303
X215_1st	215		PAC	5	1st	1	0	49	MSS	III	1	1	371
X10_1st	10		In-sol	1	1st	1	1	75	MSS	II	1	1	385
X11_1st	11		In-sol	1	1st	1	1	53	MSS	II	7	1	398
X340_1st	340		PAC	8	1st	1	0	74	MSS	III	9	0	1212
X356_1st	356		PAC	8	1st	1	1	56	MSS	II	9	0	1177
X92_1st	92		In-sol	2	1st	1	1	66	MSS	II	7	0	1184
X156_1st	156		In-sol	3	1st	1	1	80	MSS	IV	7	Exclude	Exclude
X93_1st	93		In-sol	2	1st	1	0	62	MSS	II	7	0	1160
X341_1st	341		PAC	8	1st	1	1	55	MSS	II	9	0	1160
X157_1st	157		In-sol	3	1st	1	1	76	MSS	IV	2	Exclude	Exclude
X96_1st	96		In-sol	2	1st	1	1	68	MSS	II	7	0	3419
X355_1st	355		PAC	8	1st	1	0	57	MSS	III	8	0	3402
X158_1st	158		In-sol	3	1st	1	0	92	MSS	II	1	1	12
X128_1st	128		In-sol	3	1st	1	0	59	MSS	II	3	0	2046
X159_1st	159		In-sol	3	1st	1	0	78	MSS	IV	7	Exclude	Exclude
X129_1st	129		In-sol	3	1st	1	0	66	MSS	II	1	0	1967
X105_1st	105		In-sol	2	1st	1	1	70	MSS	III	7	0	1921
X130_1st	130		In-sol	3	1st	1	1	63	MSS	II	7	0	2597
X12_1st	12		In-sol	1	1st	1	0	70	MSS	II	7	0	3258
X194_1st	194		PAC	4	1st	1	1	66	MSS	II	7	0	1888
X84_1st	84		In-sol	2	1st	1	1	74	MSS	III	7	0	1863
X362_1st	362		PAC	8	1st	1	0	63	MSS	II	9	0	1890
X83_1st	83		In-sol	2	1st	1	1	67	MSS	II	7	0	1525
X132_1st	132		In-sol	3	1st	1	1	62	MSS	II	7	0	1792
X107_1st	107		In-sol	2	1st	1	0	71	MSS	III	7	0	1715
X133_1st	133		In-sol	3	1st	1	1	79	MSS	II	7	0	1714
X134_1st	134		In-sol	3	1st	1	1	71	MSS	II	1	0	1606
X135_1st	135		In-sol	3	1st	1	0	58	MSI	II	1	0	1497
X136_1st	136		In-sol	3	1st	3	1	68	MSS	II	7	0	1389
X137_1st	137		In-sol	3	1st	1	1	70	MSS	II	7	0	1382
X138_1st	138		In-sol	3	1st	1	1	60	MSS	III	5	1	433
X110_1st	110	Biopsy_1_1	In-sol	2	1st	3	0	67	MSS	II	7	0	1154
X232_1st	232	Biopsy_1_2	PAC	6	1st	3	0	67	MSS	II	7	0	1154
X233_1st	233	Biopsy_1_3	PAC	6	1st	3	0	67	MSS	II	7	0	1154
X102_1st	102		In-sol	2	1st	1	0	76	MSS	II	7	0	1334
X122_1st	122	Biopsy_2_1	In-sol	3	1st	3	1	64	MSS	III	3	0	1303
X234_1st	234	Biopsy_2_2	PAC	6	1st	3	1	64	MSS	III	3	0	1303
X235_1st	235	Biopsy_2_3	PAC	6	1st	3	1	64	MSS	III	3	0	1303
X139_1st	139		In-sol	3	1st	1	0	83	MSI	II	4	0	1958
X120_1st	120		In-sol	2	1st	1	0	78	MSI	II	2	1	720
X101_1st	101		In-sol	2	1st	1	0	72	MSI	III	2	0	1268
X160_1st	160	Biopsy_3_1	In-sol	3	1st	2	0	83	MSS	III	3	1	211
X236_1st	236	Biopsy_3_2	PAC	6	1st	2	0	83	MSS	III	3	1	211
X257_1st	257	Biopsy_4_1	PAC	6	1st	3	0	84	MSS	II	2	0	2109
X258_1st	258	Biopsy_4_2	PAC	6	1st	3	0	84	MSS	II	2	0	2109
X259_1st	259	Biopsy_4_3	PAC	6	1st	3	0	84	MSS	II	2	0	2109
X140_1st	140		In-sol	3	1st	1	0	73	MSS	II	1	0	1923
X141_1st	141	Biopsy_5_1	In-sol	3	1st	3	1	77	MSS	II	7	0	1235
X237_1st	237	Biopsy_5_2	PAC	6	1st	3	1	77	MSS	II	7	0	1235
X238_1st	238	Biopsy_5_3	PAC	6	1st	3	1	77	MSS	II	7	0	1235
X260_1st	260	Biopsy_6_1	PAC	6	1st	3	0	84	MSS	II	1	0	2074
X261_1st	261	Biopsy_6_2	PAC	6	1st	3	0	84	MSS	II	1	0	2074
X262_1st	262	Biopsy_6_3	PAC	6	1st	3	0	84	MSS	II	1	0	2074
X263_1st	263	Biopsy_7_1	PAC	6	1st	4	1	81	MSS	I	7	Exclude	Exclude
X264_1st	264	Biopsy_7_2	PAC	6	1st	4	1	81	MSS	I	7	Exclude	Exclude
X265_1st	265	Biopsy_7_3	PAC	6	1st	4	1	81	MSS	I	7	Exclude	Exclude
X266_1st	266	Biopsy_7_4	PAC	6	1st	4	1	81	MSS	I	7	Exclude	Exclude
X161_1st	161	Biopsy_8_1	In-sol	3	1st	3	1	75	MSS	II	1	0	1200
X239_1st	239	Biopsy_8_2	PAC	6	1st	3	1	75	MSS	II	1	0	1200
X240_1st	240	Biopsy_8_3	PAC	6	1st	3	1	75	MSS	II	1	0	1200
X142_1st	142		In-sol	3	1st	1	1	70	MSS	II	2	0	1151
X106_1st	106		In-sol	2	1st	1	0	65	MSS	III	7	0	1144
X143_1st	143		In-sol	3	1st	1	0	67	MSS	II	4	Exclude	Exclude
X144_1st	144		In-sol	3	1st	1	0	66	MSS	II	7	0	1687
X145_1st	145		In-sol	3	1st	3	0	68	MSI	II	1	0	2318
X241_1st	241	Biopsy_9_1	PAC	6	1st	3	0	68	MSI	II	1	0	2318
X242_1st	242	Biopsy_9_2	PAC	6	1st	3	0	68	MSI	II	1	0	2318
X123_1st	123		In-sol	3	1st	1	1	54	MSS	III	6	0	1113
X146_1st	146		In-sol	3	1st	1	1	82	MSI	III	3	0	2284
X267_1st	267	Biopsy_10_1	PAC	6	1st	3	1	59	MSS	III	7	0	1885
X268_1st	268	Biopsy_10_2	PAC	6	1st	3	1	59	MSS	III	7	0	1885
X269_1st	269	Biopsy_10_3	PAC	6	1st	3	1	59	MSS	III	7	0	1885
X124_1st	124		In-sol	3	1st	1	0	71	MSS	III	7	0	1709
X147_1st	147		In-sol	3	1st	1	0	68	MSS	II	7	0	1617
X125_1st	125		In-sol	3	1st	3	1	67	MSS	III	1	1	357
X243_1st	243	Biopsy_11_1	PAC	6	1st	3	1	67	MSS	III	1	1	357
X244_1st	244	Biopsy_11_2	PAC	6	1st	3	1	67	MSS	III	1	1	357
X153_1st	153		In-sol	3	1st	1	1	72	MSS	III	1	0	1688
X111_1st	111		In-sol	2	1st	1	1	71	MSS	III	7	0	1684
X148_1st	148	Biopsy_12_1	In-sol	3	1st	3	0	69	MSI	II	1	0	1650
X245_1st	245	Biopsy_12_2	PAC	6	1st	3	0	69	MSI	II	1	0	1650
X246_1st	246	Biopsy_12_3	PAC	6	1st	3	0	69	MSI	II	1	0	1650
X154_1st	154	Biopsy_13_1	In-sol	3	1st	3	1	68	MSS	III	7	0	1649
X247_1st	247	Biopsy_13_2	PAC	6	1st	3	1	68	MSS	III	7	0	1649
X248_1st	248	Biopsy_13_3	PAC	6	1st	3	1	68	MSS	III	7	0	1649
X216_1st	216		PAC	5	1st	1	0	83	MSS	III	7	1	391
X112_1st	112		In-sol	2	1st	1	1	61	MSS	III	1	0	1652
X126_1st	126	Biopsy_14_1	In-sol	3	1st	3	1	82	MSS	III	3	1	381
X249_1st	249	Biopsy_14_2	PAC	6	1st	3	1	82	MSS	III	3	1	381
X250_1st	250	Biopsy_14_3	PAC	6	1st	3	1	82	MSS	III	3	1	381
X104_1st	104		In-sol	2	1st	1	1	77	MSI	III	1	0	1576
X98_1st	98		In-sol	2	1st	1	0	49	MSS	III	1	0	1829
X99_1st	99		In-sol	2	1st	1	0	43	MSS	III	2	0	1545
X282_1st	282	Biopsy_15_1	PAC	6	1st	2	0	75	MSS	II	7	0	1709
X283_1st	283	Biopsy_15_2	PAC	6	1st	2	0	75	MSS	II	7	0	1709
X115_1st	115		In-sol	2	1st	1	0	46	MSS	III	7	1	932
X100_1st	100		In-sol	2	1st	1	1	72	MSS	III	6	0	1527
X103_1st	103		In-sol	2	1st	1	0	81	MSI	III	2	0	1520
X108_1st	108		In-sol	2	1st	1	0	48	MSS	III	2	1	339
X109_1st	109		In-sol	2	1st	1	1	75	MSS	III	7	0	1484
X149_1st	149	Biopsy_16_1	In-sol	3	1st	3	1	69	MSS	II	5	1	917
X251_1st	251	Biopsy_16_2	PAC	6	1st	3	1	69	MSS	II	5	1	917
X252_1st	252	Biopsy_16_3	PAC	6	1st	3	1	69	MSS	II	5	1	917
X270_1st	270	Biopsy_17_1	PAC	6	1st	3	0	90	MSS	II	1	0	1602
X271_1st	271	Biopsy_17_2	PAC	6	1st	3	0	90	MSS	II	1	0	1602
X272_1st	272	Biopsy_17_3	PAC	6	1st	3	0	90	MSS	II	1	0	1602
X114_1st	114		In-sol	2	1st	1	1	78	MSS	III	1	0	1415
X273_1st	273	Biopsy_18_1	PAC	6	1st	3	1	77	MSS	II	7	0	1580
X274_1st	274	Biopsy_18_2	PAC	6	1st	3	1	77	MSS	III	7	0	1580
X275_1st	275	Biopsy_18_3	PAC	6	1st	3	1	77	MSS	II	7	0	1580
X276_1st	276	Biopsy_19_1	PAC	6	1st	3	0	76	MSI	II	1	0	1582
X277_1st	277	Biopsy_19_2	PAC	6	1st	3	0	76	MSI	II	1	0	1582
X278_1st	278	Biopsy_19_3	PAC	6	1st	3	0	76	MSI	II	1	0	1582
X187_1st	187		PAC	4	1st	1	1	70	MSS	III	7	0	1393
X163_1st	163		In-sol	3	1st	1	1	70	MSS	III	7	0	1377
X150_1st	150	Biopsy_20_1	In-sol	3	1st	3	1	75	MSS	II	7	1	176
X253_1st	253	Biopsy_20_2	PAC	6	1st	3	1	75	MSS	II	7	1	176
X254_1st	254	Biopsy_20_3	PAC	6	1st	3	1	75	MSS	II	7	1	176
X113_1st	113		In-sol	2	1st	1	1	75	MSS	III	2	1	515
X204_1st	204		PAC	5	1st	1	0	64	MSS	III	6	0	1352
X119_1st	119		In-sol	2	1st	1	0	50	MSS	III	5	1	464
X162_1st	162		In-sol	3	1st	1	0	73	MSS	III	1	0	1314
X169_1st	169		PAC	4	1st	1	0	58	MSS	III	7	1	1081
X117_1st	117		In-sol	2	1st	1	0	50	MSS	III	7	1	343
X165_1st	165		PAC	4	1st	1	1	69	MSS	III	7	0	1282
X279_1st	279	Biopsy_21_1	PAC	6	1st	3	1	80	MSS	III	1	0	1449
X280_1st	280	Biopsy_21_2	PAC	6	1st	3	1	80	MSS	III	1	0	1449
X281_1st	281	Biopsy_21_3	PAC	6	1st	3	1	80	MSS	III	1	0	1449
X170_1st	170		PAC	4	1st	1	1	69	MSI	III	4	0	1271
X171_1st	171		PAC	4	1st	1	0	65	MSS	III	6	0	1259
X172_1st	172		PAC	4	1st	1	1	81	MSS	III	2	0	1238
X208_1st	208	Biopsy_22_1	PAC	5	1st	3	1	66	MSS	III	2	0	1215
X255_1st	255	Biopsy_22_2	PAC	6	1st	3	1	66	MSS	III	2	0	1215
X256_1st	256	Biopsy_22_3	PAC	6	1st	3	1	66	MSS	III	2	0	1215
X164_1st	164		In-sol	3	1st	1	1	63	MSS	II	7	0	1201
X206_1st	206		PAC	5	1st	1	1	58	MSI	II	1	0	1201
X118_1st	118		In-sol	2	1st	1	0	78	MSS	II	1	1	367
X116_1st	116		In-sol	2	1st	1	0	61	MSS	III	4	1	323
X205_1st	205		PAC	5	1st	1	0	61	MSI	III	4	0	1160
X207_1st	207		PAC	5	1st	1	0	59	MSS	II	1	0	974
X209_1st	209		PAC	5	1st	1	1	50	MSS	II	2	1	1078
X217_1st	217		PAC	5	1st	1	1	77	MSI	II	2	1	704
X210_1st	210		PAC	5	1st	1	1	76	MSS	III	2	1	559
X151_1st	151		In-sol	3	1st	1	1	69	MSS	III	1	1	351
X152_1st	152		In-sol	3	1st	1	1	50	MSS	III	7	1	366
X211_1st	211		PAC	5	1st	1	1	72	MSS	II	3	0	1126
X203_1st	203		PAC	5	1st	1	1	67	MSS	II	7	0	1125
X127_1st	127		In-sol	3	1st	1	0	71	MSS	III	1	1	356
X121_1st	121		In-sol	2	1st	1	0	72	MSS	II	1	1	371
X292_1st	292		PAC	7	1st	1	1	68	MSS	II	7	0	1106
X293_1st	293		PAC	7	1st	1	1	64	MSS	II	7	1	377
X284_1st	284		PAC	7	1st	1	0	63	MSI	II	7	0	1295
X329_1st	329		PAC	7	1st	1	0	88	MSS	III	2	0	1190
X315_1st	315		PAC	7	1st	1	1	82	MSS	II	7	0	1634
X294_1st	294		PAC	7	1st	1	1	59	MSS	II	7	0	1627
X291_1st	291		PAC	7	1st	1	1	81	MSI	III	1	0	1275
X297_1st	297		PAC	7	1st	1	1	57	MSS	II	7	0	1269
X327_1st	327		PAC	7	1st	1	1	72	MSS	III	7	0	1269
X296_1st	296		PAC	7	1st	1	1	62	MSS	II	1	0	1261
X325_1st	325		PAC	7	1st	1	0	69	MSS	II	2	0	1255
X295_1st	295		PAC	7	1st	1	1	63	MSS	II	7	0	1254
X290_1st	290		PAC	7	1st	1	1	77	MSI	II	2	0	1247
X324_1st	324		PAC	7	1st	1	0	54	MSS	III	7	0	1205
X289_1st	289		PAC	7	1st	1	1	72	MSS	III	2	1	654
X299_1st	299		PAC	7	1st	1	0	70	MSS	III	1	0	1219
X300_1st	300		PAC	7	1st	1	1	59	MSS	II	5	0	1211
X288_1st	288		PAC	7	1st	1	0	49	MSS	III	7	0	1177
X301_1st	301		PAC	7	1st	1	1	67	MSI	II	3	0	622
X287_1st	287		PAC	7	1st	1	1	70	MSI	III	3	0	1127
X318_1st	318		PAC	7	1st	1	0	77	MSS	II	1	0	1141
X302_1st	302		PAC	7	1st	1	1	57	MSI	III	2	0	1115
X303_1st	303		PAC	7	1st	1	1	74	MSS	III	7	0	1136
X304_1st	304		PAC	7	1st	1	1	65	MSS	III	1	0	1472
X285_1st	285		PAC	7	1st	1	0	78	MSS	II	2	0	1122
X317_1st	317		PAC	7	1st	1	1	83	MSI	II	1	0	1125
X305_1st	305		PAC	7	1st	1	1	70	MSS	III	7	1	1148
X298_1st	298		PAC	7	1st	1	1	71	MSS	III	7	0	1459
X313_1st	313		PAC	7	1st	1	1	74	MSS	II	7	0	1444
X312_1st	312		PAC	7	1st	1	0	67	MSS	II	4	0	1443
X322_1st	322		PAC	7	1st	1	0	87	MSS	II	1	0	1430
X311_1st	311		PAC	7	1st	1	0	67	MSS	III	2	0	1408
X310_1st	310		PAC	7	1st	1	0	79	MSI	II	2	0	899
X320_1st	320		PAC	7	1st	1	1	75	MSI	II	1	0	1380
X309_1st	309		PAC	7	1st	1	0	74	MSS	III	7	1	793
X308_1st	308		PAC	7	1st	1	0	60	MSS	II	7	0	1358
X326_1st	326		PAC	7	1st	1	0	78	MSI	II	2	0	1360
X307_1st	307		PAC	7	1st	1	1	64	MSS	III	2	1	1037
X306_1st	306		PAC	7	1st	1	0	65	MSS	II	1	1	283
X286_1st	286		PAC	7	1st	1	1	66	MSI	III	2	0	1347
X323_1st	323		PAC	7	1st	1	1	64	MSS	II	7	1	336
X319_1st	319		PAC	7	1st	1	1	72	MSS	III	7	0	1340
X321_1st	321		PAC	7	1st	1	1	78	MSI	II	6	0	1324
X314_1st	314		PAC	7	1st	1	0	48	MSS	III	1	0	1108
X328_1st	328		PAC	7	1st	1	0	57	MSI	II	7	0	1319
X316_1st	316		PAC	7	1st	1	1	66	MSS	II	1	0	1319
X195_1st	195		PAC	4	1st	1	1	58	MSS	III	7	1	432
X196_1st	196		PAC	4	1st	1	0	90	MSS	III	7	1	672
X197_1st	197		PAC	4	1st	1	1	78	MSS	II	7	1	556
X198_1st	198		PAC	4	1st	1	1	94	MSS	III	7	1	471
X199_1st	199		PAC	4	1st	1	1	69	MSS	III	7	1	489
X200_1st	200		PAC	4	1st	1	0	62	MSS	III	Colon, tumor affecting multiple region	0	2644
X189_1st	189		PAC	4	1st	1	1	48	MSI	II	4	0	2481
X201_1st	201		PAC	4	1st	1	0	79	MSI	II	2	0	2482
X185_1st	185		PAC	4	1st	1	1	79	MSI	II	1	0	1794
X202_1st	202		PAC	4	1st	1	1	80	MSS	II	6	0	2354
X186_1st	186		PAC	4	1st	1	1	73	MSS	III	7	0	2299
X190_1st	190		PAC	4	1st	1	1	79	MSS	II	7	0	2469
X191_1st	191		PAC	4	1st	1	1	88	MSS	II	7	0	1353
X192_1st	192		PAC	4	1st	1	0	91	MSS	II	2	0	2578
X188_1st	188		PAC	4	1st	1	0	74	MSI	II	4	0	1433
X193_1st	193		PAC	4	1st	1	0	62	MSS	II	7	0	2210
X176_1st	176		PAC	4	1st	1	0	79	MSS	II	5	0	2129
X177_1st	177		PAC	4	1st	1	1	70	MSS	II	7	0	1997

## Sheet: 2nd COHORT
ID	OrderID	Biopsies_ID	Digestion	Batch	Cohort	num_biopsies	Gender	Age	MSI	Stage	Tumour_loc	RFS	RFStime
X48_2nd	48		PAC	9	2nd	1	0	85	MSS	II	2	1	1193
X50_2nd	50		PAC	9	2nd	1	1	77	MSS	II	4	1	240
X53_2nd	53		PAC	9	2nd	1	1	75	MSS	II	1	1	406
X54_2nd	54		PAC	9	2nd	1	0	52	MSS	II	9	1	1096
X1_2nd	1		PAC	9	2nd	1	0	67	MSS	II	2	1	953
X56_2nd	56		PAC	9	2nd	1	1	83	MSS	II	9	1	1129
X142_2nd	142		PAC	9	2nd	1	0	70	MSS	III	7	1	1744
X147_2nd	147		PAC	9	2nd	1	1	73	MSS	II	9	1	368
X98_2nd	98		PAC	9	2nd	1	1	77	MSS	II	7	Exclude	Exclude
X100_2nd	100		PAC	9	2nd	1	1	68	MSS	III	8	Exclude	Exclude
X176_2nd	176		PAC	9	2nd	1	1	75	MSS	II	1	1	392
X104_2nd	104		PAC	9	2nd	1	1	77	MSS	III	7	1	715
X106_2nd	106		PAC	9	2nd	1	0	73	MSS	II	7	1	1200
X3_2nd	3		PAC	9	2nd	1	0	73	MSS	III	9	1	354
X109_2nd	109		PAC	9	2nd	1	1	69	MSS	III	8	0	1634
X112_2nd	112		PAC	9	2nd	1	1	68	MSS	III	8	0	1540
X152_2nd	152		PAC	9	2nd	1	0	60	MSI	II	2	1	380
X14_2nd	14		PAC	9	2nd	1	1	59	MSS	III	5	0	2123
X155_2nd	155		PAC	9	2nd	1	0	61	MSS	III	7	0	2051
X118_2nd	118		PAC	9	2nd	1	0	76	MSS	II	7	0	1822
X125_2nd	125		PAC	9	2nd	1	0	44	MSS	III	8	0	1716
X18_2nd	18		PAC	9	2nd	1	0	74	MSS	III	10	Exclude	1636
X22_2nd	22	Biopsy_1_1	PAC	9	2nd	2	0	79	MSS	III	1	1	151
X179_2nd	179	Biopsy_1_2	PAC	9	2nd	2	0	79	MSS	III	1	1	151
X21_2nd	21		PAC	9	2nd	1	0	52	MSS	III	9	1	1224
X127_2nd	127		PAC	9	2nd	1	1	54	MSS	II	8	0	1703
X160_2nd	160		PAC	9	2nd	1	1	73	MSS	III	7	0	1700
X180_2nd	180		PAC	9	2nd	1	0	81	MSS	III	4	Exclude	Exclude
X161_2nd	161		PAC	9	2nd	1	1	62	MSS	III	8	0	1902
X73_2nd	73		PAC	9	2nd	1	0	57	MSS	III	9	0	1673
X129_2nd	129		PAC	9	2nd	1	1	80	MSS	III	8	0	1877
X132_2nd	132		PAC	9	2nd	1	1	76	MSS	II	9	0	1596
X164_2nd	164		PAC	9	2nd	1	0	67	MSS	III	7	0	1800
X135_2nd	135		PAC	9	2nd	1	0	51	MSS	II	9	0	1793
X28_2nd	28		PAC	9	2nd	1	1	65	MSS	III	9	1	820
X136_2nd	136		PAC	9	2nd	1	1	67	MSS	II	9	0	1543
X75_2nd	75		PAC	9	2nd	1	1	53	MSS	II	7	0	1523
X33_2nd	33		PAC	9	2nd	1	0	77	MSS	II	2	0	1499
X167_2nd	167		PAC	9	2nd	1	1	45	MSS	III	4	1	332
X169_2nd	169		PAC	9	2nd	1	0	48	MSS	II	2	1	399
X171_2nd	171		PAC	9	2nd	1	0	62	MSI	III	7	0	2064
X35_2nd	35		PAC	9	2nd	1	0	72	MSS	III	2	0	1699
X37_2nd	37		PAC	9	2nd	1	1	70	MSS	III	1	0	1339
X172_2nd	172		PAC	9	2nd	1	1	80	MSS	II	7	0	1465
X79_2nd	79		PAC	9	2nd	1	1	55	MSS	III	7	0	1332
X80_2nd	80		PAC	9	2nd	1	1	72	MSS	II	8	0	1446
X38_2nd	38		PAC	9	2nd	1	0	74	MSI	II	1	0	1452
X40_2nd	40		PAC	9	2nd	1	0	63	MSS	III	1	0	1311
X42_2nd	42		PAC	9	2nd	1	1	60	MSS	II	1	0	1415
X83_2nd	83		PAC	9	2nd	1	0	57	MSS	III	7	0	1247
X85_2nd	85		PAC	9	2nd	1	0	64	MSS	II	8	0	1334
X86_2nd	86		PAC	9	2nd	1	1	77	MSS	II	7	0	1306
X44_2nd	44		PAC	9	2nd	1	0	77	MSS	II	2	0	1291
X90_2nd	90		PAC	9	2nd	1	1	85	MSS	III	1	1	397

## Sheet: Legend
Column name	Description
ID	proteomics analysis identifier (including cohort)
OrderID	proteomics analysis identifier
Biopsies_ID	samples from the same patient, only one should be used when doing RFS analysis
Digestion	In-sol: digestion in solution; PAC: digestion using protein aggregation capture
Batch	experimental batch
Cohort	1st or 2nd cohort
num_biopsies	number of biopsies from the same patient
Gender	0=female, 1=male
Age	Age at surgery
MSI	MSI status: Stability status according to original Suraweera criteria; two categories (MSS/MSI-L (0-2 unstable markers), 1=MSI high (>2 unstable markers); based on PMID: 12454837
Stage	UICC_stage (updated_dec2021)
Tumour_loc	Tumor location: 1=Coecum; 2=Asendens; 3=Right Flexur; 4=Transversum; 5=left Flexur; 6=Descendens; 7=Sigmoideum; 8= Upper Rectum, 10-15 cm; 9=Middle Rectum, 5-10 cm
RFS	Relapse free survival event: 1=recurrence or crc-related death, 0=no CRC relapse or no CRC related death, exclude=do not use in the analysis due to protocol violation
RFStime	Relapse Free Survival analysis time (days; for events: time to recurrence or crc-related death; for non-event: time to death of CRC non-related/unknown causes or time to last follow-up for alive patients)
