# Supplementary material for: Proteomics of colorectal tumors identifies the role of CAVIN1 in tumor formation and progression
Source: Research Square preprint supplement (doi:10.21203/rs.3.rs-3817695/v1), 2024-01-11
Supplement: Supplementary file 4 [file a5e3d6609e5247b34032d822.xlsx]

## Sheet: limma_MSSvsMSI
Gene.name	log2 fold.change (MSS vs MSI)	adj.P.Val	SIG
C4BPA	-1.13262	1.13402e-15	UP in MSI
CP	-0.848847	1.68669e-14	UP in MSI
ITGB2	-0.988203	1.32265e-12	UP in MSI
ITGAM	-1.02632	1.56732e-12	UP in MSI
FGB	-1.36098	2.95461e-12	UP in MSI
ORM2	-0.8256	5.83337e-12	UP in MSI
CD55	-1.09804	6.51272e-12	UP in MSI
ORM1	-0.885329	1.1405e-11	UP in MSI
FGA	-1.2785	1.66208e-11	UP in MSI
PLG	-1.03811	1.86107e-11	UP in MSI
C6	-0.960518	2.1773e-11	UP in MSI
RAB27B	-0.7821	2.72628e-11	UP in MSI
AGR2	-1.15069	3.99412e-11	UP in MSI
MRE11	1.13627	2.22096e-34	UP in MSS
HSPH1	1.23868	5.53896e-26	UP in MSS
RAD50	0.808129	1.47691e-22	UP in MSS
MLH1	1.30213	4.07477e-22	UP in MSS
EPDR1	1.35618	3.53576e-19	UP in MSS
NBN	0.801842	6.11116e-19	UP in MSS
ACSL5	1.02703	2.64824e-17	UP in MSS
PRDX5	0.941661	2.25998e-15	UP in MSS
AMACR	1.633	2.5047e-15	UP in MSS
EPB41L1	0.980854	5.97146e-15	UP in MSS
TMCC3	1.101	3.02623e-14	UP in MSS
SSBP1	0.763293	3.02623e-14	UP in MSS
GGH	0.945965	9.05509e-14	UP in MSS
GPX2	1.00581	5.05378e-13	UP in MSS
ALDH1B1	0.956916	9.38433e-13	UP in MSS
NUDT4	1.45709	2.19532e-12	UP in MSS
MYH14	0.788997	2.95461e-12	UP in MSS
COBLL1	0.791508	7.97108e-12	UP in MSS
SMAP1	0.862661	1.30785e-11	UP in MSS
CKB	1.69804	3.37092e-11	UP in MSS
SLC25A13	0.717808	3.07274e-20
UBA2	0.478759	2.78868e-18
RPL22	0.632995	2.64824e-17
AHCY	0.597826	1.83012e-13
CHMP4B	0.615237	2.5939e-13
TXNDC9	0.686481	2.95461e-12
HSD17B10	0.596016	2.95461e-12
SEC24D	-0.549116	3.06453e-12
PFKP	-0.556453	5.30031e-12
SUCLA2	0.612511	2.03623e-11
SERPINC1	-0.671516	2.03623e-11
HIBADH	0.649816	2.1773e-11
CASK	0.617645	2.43332e-11
RPIA	0.718161	2.49765e-11
RALY	0.681141	2.58715e-11
SMCHD1	-0.538224	2.72628e-11
PTPRE	-0.544628	2.97273e-11
CDCP1	-0.533743	3.73026e-11
AIFM1	0.533755	6.80595e-11
DPEP1	1.90428	1.16152e-10
DDAH2	0.729055	1.44025e-10
SELENBP1	1.04466	2.35811e-10
DDX27	0.604449	2.55308e-10
ENTPD5	1.09584	3.05321e-10
MTCH2	0.56357	3.85533e-10
SYTL4	-0.762259	4.09437e-10
PDHA1	0.520261	4.22413e-10
LTN1	0.780088	4.40327e-10
C5	-0.905938	4.40327e-10
PTCD3	0.496221	4.63322e-10
NUDC	-0.42527	4.99458e-10
NIT2	0.424718	7.77479e-10
C4A	-0.658031	8.31335e-10
GALNT1	-0.474011	8.7715e-10
SRI	0.696359	9.53088e-10
C3	-0.701413	1.10635e-09
UGT8	-0.933776	1.12337e-09
DDX28	0.783656	1.12772e-09
CTNNB1	0.539264	1.13572e-09
NARS1	-0.455981	1.39644e-09
HP	-0.790213	1.69365e-09
MSH2	0.660993	2.01765e-09
ANP32E	-0.554948	2.40157e-09
ALOX5	-0.87185	2.92449e-09
F2	-0.674131	4.12995e-09
SKIV2L	0.525799	5.14323e-09
NT5E	-0.772086	6.68592e-09
S100A8	-0.85438	6.68592e-09
YWHAB	0.340782	7.3217e-09
LRPPRC	0.445338	8.34184e-09
MNDA	-0.909474	8.34184e-09
OAS2	-1.03511	8.34184e-09
PGLS	0.396752	8.97795e-09
FGG	-1.17644	8.97795e-09
LIN7C	1.00453	9.01983e-09
CLU	-0.764664	1.15728e-08
SYNC	1.08616	1.16365e-08
ALDH2	0.584451	1.24269e-08
MUC5AC	-1.87776	1.31149e-08
SERPING1	-0.558308	1.36035e-08
CYBB	-0.712914	1.45324e-08
FABP1	1.40928	1.48848e-08
CPNE1	0.731172	1.654e-08
NCOA5	0.544895	1.80986e-08
S100A9	-0.927534	1.91447e-08
ACOT8	1.00511	2.13996e-08
A1BG	-0.675994	2.1643e-08
PTPRC	-0.534835	2.18589e-08
IQGAP2	-0.828631	2.37369e-08
VIL1	0.675491	2.58932e-08
QPRT	1.01585	2.69612e-08
APOB	-0.715346	2.69612e-08
ELF1	0.752814	2.95499e-08
TRIP6	0.895804	3.11293e-08
CMAS	0.606101	3.21475e-08
NUCB2	-0.765881	3.22124e-08
NCF4	-0.719578	3.27909e-08
MCM4	-0.944303	3.75611e-08
CFB	-0.547795	3.78269e-08
NAXE	0.519476	3.80103e-08
HSDL2	0.537971	3.81796e-08
BLVRA	-0.520359	3.8192e-08
SLK	-0.40737	3.85436e-08
KNG1	-0.529332	3.85436e-08
AK3	0.686507	4.27443e-08
ELAC2	-0.604908	4.75478e-08
DIAPH2	0.422595	4.79481e-08
HADH	0.525897	4.79977e-08
ABAT	1.1685	5.02223e-08
APOE	-0.720948	5.30213e-08
SEC31A	0.329773	5.48845e-08
C9	-0.747494	5.56252e-08
HMGCS2	1.27952	5.74975e-08
CDH17	0.826611	5.98085e-08
MMP8	-0.944193	6.35886e-08
LBP	-0.785562	6.96453e-08
IFIT5	-0.836135	6.96453e-08
NMI	-0.546994	7.41516e-08
GGCT	0.550025	7.60581e-08
SPTLC2	-0.493958	7.87315e-08
HSD11B2	1.26606	7.93201e-08
TPD52L2	0.369992	8.17138e-08
PCCA	0.740187	8.2204e-08
MSH3	0.679302	8.34726e-08
INPP1	-0.680482	8.34726e-08
PNPT1	0.444371	8.72873e-08
SERPINF2	-0.842053	9.37284e-08
S100A12	-1.17804	9.91735e-08
GOT2	0.411325	1.00809e-07
C7	-0.854709	1.00867e-07
WARS1	-0.536462	1.06941e-07
HUWE1	0.399181	1.17128e-07
BPI	-0.94557	1.17128e-07
SATB2	0.993545	1.22686e-07
PTCD1	0.597772	1.36237e-07
PLA2G4A	-0.989975	1.41112e-07
TMX1	-0.365967	1.41815e-07
PAF1	-0.435454	1.41815e-07
MEP1A	1.25397	1.52755e-07
ERMP1	0.643367	1.52755e-07
MKI67	-0.627298	1.5466e-07
UBR5	0.557369	1.56648e-07
ENGASE	0.932384	1.73617e-07
SERPIND1	-0.760463	1.7536e-07
CEACAM5	0.907867	1.81348e-07
MMP9	-0.88238	1.83641e-07
MAPK13	0.591307	1.88801e-07
CARS2	0.744694	1.9187e-07
MPO	-0.935721	1.9187e-07
MAPRE2	-0.687156	2.02395e-07
CYP27A1	0.886089	2.11695e-07
EIF6	0.459758	2.11695e-07
SUCLG1	0.587061	2.21561e-07
MAP1LC3B2	-0.617848	2.24198e-07
UQCC2	0.769868	2.33257e-07
PYGL	-0.682908	2.34969e-07
MARCKS	0.522009	2.36581e-07
RFC4	-0.455085	2.48445e-07
AHSA1	-0.30891	2.50211e-07
GBP1	-0.723688	2.51822e-07
EIF5A	-0.326398	2.55732e-07
SERPINE2	0.893328	2.69491e-07
GOLM2	-0.601081	2.72676e-07
SNX12	0.64123	2.73844e-07
CAMP	-1.09232	2.73844e-07
HTATIP2	0.580941	2.92498e-07
RPA1	-0.300009	2.92498e-07
PCK2	0.562157	2.92787e-07
ZMYND8	0.504313	2.99266e-07
FSCN1	-0.651391	2.99266e-07
OXCT1	-0.8097	2.99266e-07
XPNPEP1	-0.532631	2.99862e-07
SEPHS2	0.624937	3.11623e-07
ACOT13	0.538889	3.12184e-07
TMEM214	-0.413771	3.1621e-07
STAT1	-0.578742	3.19946e-07
RAB27A	-0.655971	3.31838e-07
GC	-0.560103	3.78665e-07
ELN	1.15166	3.98062e-07
MDH2	0.43727	3.98062e-07
RRM1	-0.617559	4.14536e-07
IYD	0.768384	4.2727e-07
PRKAR2A	0.356523	4.46084e-07
LTF	-0.985848	4.75358e-07
HNF4A	0.665429	5.20641e-07
CEMIP2	-0.567996	5.20713e-07
GPD1L	0.475626	5.57346e-07
SEPTIN2	0.321686	5.57346e-07
NCF2	-0.633146	5.65327e-07
C4BPB	-1.23978	5.65327e-07
NOX1	0.752922	5.65594e-07
DARS2	0.493759	5.68153e-07
GNAI2	-0.367331	5.70924e-07
LYZ	-0.760224	5.70924e-07
GYS1	-0.456417	6.11585e-07
ANXA1	-0.509044	6.67302e-07
RPRD1B	0.436456	7.03008e-07
SERPINA1	-0.693752	7.08285e-07
HCK	-0.760191	7.85892e-07
SERPINA7	-0.540821	7.94004e-07
SEPTIN8	0.444425	9.02421e-07
GCA	-0.617373	9.17961e-07
BST1	-0.737398	9.33263e-07
MYEF2	0.914466	9.72726e-07
TTC37	0.464758	9.94963e-07
ETFB	0.428648	1.00676e-06
FIS1	0.503795	1.01751e-06
LY75	0.51038	1.02544e-06
TMED7	-0.312156	1.06546e-06
RUVBL2	0.27461	1.07491e-06
ALDH4A1	1.03134	1.09285e-06
ACAA2	0.512097	1.16105e-06
S100A16	-0.752461	1.16941e-06
GTPBP6	0.626304	1.21889e-06
CTR9	-0.439639	1.22466e-06
C8B	-0.609994	1.22679e-06
ITGB5	-0.657176	1.23468e-06
CDC73	-0.434403	1.32704e-06
CTSG	-1.04863	1.43984e-06
USP48	-0.453042	1.50832e-06
IMMT	0.352548	1.63836e-06
HRG	-0.546163	1.72922e-06
DNAJC19	0.574024	1.75548e-06
ATP6V0D1	-0.405928	1.75548e-06
TCIRG1	-0.630402	1.99446e-06
PPA1	0.354113	2.04945e-06
PPP1R7	0.365902	2.08561e-06
SLC25A6	0.435052	2.12415e-06
FMNL1	-0.617569	2.24616e-06
VTN	-1.01274	2.24616e-06
LYN	-0.482574	2.27653e-06
MYDGF	-0.330318	2.27981e-06
PCCB	0.612307	2.28926e-06
MRPL42	-1.49217	2.33859e-06
SERPINB10	-0.752222	2.3419e-06
CTPS2	0.403602	2.44081e-06
DLAT	0.371449	2.51251e-06
TATDN1	0.609906	2.70788e-06
HSP90AB4P	-0.725616	2.83574e-06
SPPL2A	-0.459764	2.87097e-06
BAG2	-0.908784	2.90328e-06
SERPINB1	-0.404257	2.9423e-06
GUCY2C	0.600944	3.02749e-06
F9	-0.658509	3.06051e-06
LDLR	-0.676496	3.08639e-06
HLA-E	-0.846408	3.72342e-06
GBP2	-0.599737	3.80694e-06
MAVS	0.619966	3.88963e-06
FCGRT	0.597997	3.88963e-06
UGT1A10	1.09737	3.89756e-06
PRKDC	0.365035	3.89947e-06
CFH	-0.668135	3.89977e-06
IVNS1ABP	-0.683208	3.95013e-06
C8A	-0.645073	3.96226e-06
ROCK2	0.344763	4.01508e-06
PADI4	-1.21305	4.03373e-06
HSPA1A	0.324671	4.17001e-06
P4HB	-0.322123	4.3376e-06
VDAC1	0.352166	4.54623e-06
BCS1L	0.611564	4.5758e-06
NEU1	0.808843	4.87605e-06
RAB32	0.471707	4.89107e-06
GLRX	-0.490638	4.98818e-06
ITIH4	-0.491905	5.38551e-06
HPX	-0.564963	5.44521e-06
CSK	-0.328492	5.61941e-06
STK38	0.491291	5.64099e-06
KLC4	0.433588	6.06795e-06
STAU2	-1.22538	6.23656e-06
TIMP1	-0.605529	6.37829e-06
GPALPP1	0.622697	7.62266e-06
ELANE	-1.02121	7.62266e-06
ATG3	-0.307863	7.78079e-06
VAPA	-0.380974	8.19833e-06
BSG	-0.514863	8.84776e-06
C1S	-0.668562	8.84776e-06
NT5DC3	-0.617828	8.85362e-06
DPP4	-0.918195	9.06452e-06
MEST	0.479407	9.16245e-06
MUC5B	-1.38848	9.16434e-06
USP7	0.341246	9.22464e-06
MACC1	0.711497	9.29141e-06
IGHM	-0.760155	9.35156e-06
UQCRFS1	0.405972	9.96615e-06
ACBD5	-0.596257	1.01967e-05
OAS3	-0.544793	1.02479e-05
TUFM	0.368315	1.0406e-05
FHL1	0.706958	1.06126e-05
CYP4F3	-0.874636	1.07675e-05
POFUT1	0.626594	1.07894e-05
HID1	-0.7104	1.07894e-05
ABCB7	0.38091	1.07931e-05
EZR	-0.352142	1.08941e-05
RGS19	-0.83114	1.11431e-05
NUDCD3	0.478284	1.13506e-05
MEMO1	-0.674001	1.16654e-05
ATP6V1B2	-0.298446	1.18388e-05
FERMT3	-0.478222	1.21765e-05
RHOG	-0.470855	1.25052e-05
ARFGEF2	0.349855	1.25706e-05
ATP6V1E1	-0.36067	1.28819e-05
CADPS	0.854449	1.35577e-05
EEA1	0.424554	1.35746e-05
RIDA	0.632157	1.3645e-05
ATP6V1H	-0.359553	1.47742e-05
PARP14	-0.412855	1.5194e-05
SAE1	0.401459	1.53221e-05
LAP3	-0.373268	1.55575e-05
SEC63	0.416548	1.56489e-05
ADAM17	0.416333	1.60209e-05
DECR1	0.363558	1.60209e-05
ALDH1A3	0.916907	1.65612e-05
TIMM8A	0.544259	1.6979e-05
PTPRJ	-0.480705	1.75327e-05
ETFA	0.382337	1.7956e-05
PFN1	-0.328244	1.81376e-05
FUT8	-0.690002	1.90951e-05
CD14	-0.449132	2.07569e-05
NMD3	-0.406743	2.10568e-05
HEPH	0.541669	2.11828e-05
FUNDC2	0.872125	2.25727e-05
AZU1	-0.781881	2.25727e-05
ENO1	-0.296971	2.37239e-05
MYO1F	-0.58081	2.39202e-05
MCCC2	0.37289	2.39802e-05
ATIC	0.294693	2.41513e-05
PDS5B	0.368687	2.50004e-05
DKC1	0.323297	2.50004e-05
GSS	0.441557	2.50553e-05
RTF2	0.615711	2.51448e-05
SSR4	-0.340682	2.51537e-05
GADD45GIP1	0.760637	2.52643e-05
COPG1	-0.248224	2.52643e-05
DMAC2L	0.55362	2.59097e-05
HNRNPUL1	0.266397	2.60747e-05
PDLIM1	0.289047	2.61677e-05
SSR3	-0.475765	2.61677e-05
P4HA1	-0.499057	2.61677e-05
ANTXR2	-0.680241	2.61677e-05
C1QA	-0.695186	2.63158e-05
TMED10	-0.258116	2.64287e-05
MRPL19	0.473027	2.81258e-05
PPP2R5E	-0.432302	2.93851e-05
NFKB2	-0.401324	2.94761e-05
S100P	-0.72467	2.94761e-05
MOCS3	0.655924	2.96407e-05
GBF1	-0.509979	2.97877e-05
PLEK	-0.744478	2.97877e-05
RAE1	0.447543	3.0255e-05
NARS2	0.525968	3.19889e-05
HEXIM1	-0.564767	3.19889e-05
ABCF1	0.329797	3.22108e-05
ANXA7	0.283184	3.32327e-05
CHMP3	0.590159	3.45443e-05
VCP	0.296541	3.48719e-05
CHDH	0.643514	3.62429e-05
YARS1	-0.27465	3.98199e-05
AUH	0.548753	4.03647e-05
GUF1	0.680035	4.03656e-05
SMIM20	0.687607	4.05649e-05
GALNT7	-0.467861	4.12295e-05
DOCK5	-0.724099	4.42076e-05
POFUT2	0.622495	4.4249e-05
PUS7	0.559619	4.46248e-05
LRG1	-0.691614	4.46248e-05
CRYL1	0.625617	4.4791e-05
CUL4B	0.316761	4.51827e-05
TRMT10C	0.340374	4.54245e-05
ANXA8	0.477286	4.54353e-05
ILF2	0.320424	4.54353e-05
AZGP1	-0.422576	4.54353e-05
MUC2	-1.23522	4.73084e-05
ALDH7A1	0.361918	4.75104e-05
BCKDHB	0.543416	4.87109e-05
CRELD2	-0.455146	4.8809e-05
LRP1	0.451128	4.96903e-05
HAT1	-0.316418	5.0113e-05
TSPAN1	-0.774914	5.0113e-05
PRTN3	-0.998794	5.0113e-05
ME2	-0.320378	5.05973e-05
RABEP2	0.636958	5.12217e-05
BAG3	-0.573448	5.14179e-05
B3GNT3	0.703676	5.18393e-05
OPA1	0.419893	5.30554e-05
MIA3	-0.370432	5.30554e-05
UQCRC2	0.351273	5.38109e-05
AVL9	0.338327	5.38109e-05
CC2D1A	0.475094	5.44559e-05
MAPRE3	0.496207	5.55306e-05
A2M	-0.472736	5.6381e-05
FRYL	0.443006	5.81646e-05
TYMP	-0.47742	5.97242e-05
TGM2	0.411759	6.13083e-05
CENPV	-0.443365	6.35085e-05
NUDT19	0.55966	6.85632e-05
VPS36	0.385996	7.02643e-05
RAC2	-0.68316	7.13509e-05
CES2	1.04211	7.14341e-05
BRI3BP	-0.458705	7.24012e-05
GRIPAP1	-0.322966	7.36376e-05
SPG11	-0.682636	7.38218e-05
ITIH3	-0.641201	7.92368e-05
TPPP3	0.707225	8.08928e-05
PRPSAP2	-0.399478	8.27514e-05
CANT1	-0.40285	8.27514e-05
CTSZ	0.459142	8.65307e-05
GALNT6	0.666151	8.69502e-05
ACOT11	0.561019	9.07047e-05
UQCRQ	0.632929	9.25304e-05
RETN	-0.645394	9.25304e-05
PDZD11	0.514134	9.64695e-05
LYPLA1	0.388183	9.66402e-05
IGHG1	-0.421092	9.88081e-05
PRKG1	0.472911	0.000103087
PTBP3	0.355843	0.000107042
SERPINA3	-0.504284	0.00011115
EVI2B	-0.538475	0.000112915
KLKB1	-0.543019	0.000114361
CSNK1G1	-0.380622	0.000114472
PTGR1	0.358352	0.000114599
METTL7A	0.456328	0.000114961
DPP3	0.3597	0.000116802
GCDH	0.654085	0.000116878
APOH	-0.445773	0.000116878
PAM16	0.461653	0.000119702
OXR1	0.353977	0.000120394
GAL3ST2	0.613207	0.000120842
TBCE	0.497701	0.000120842
SNX4	0.428308	0.000120842
HK3	-0.501394	0.000120842
ALOX5AP	-0.628637	0.000120842
TFAM	0.382647	0.000120874
PPP2R2A	-0.389818	0.000120874
USO1	-0.263696	0.000125655
SEC14L2	-0.548971	0.000128406
PGD	-0.268406	0.00013248
OCRL	0.422686	0.000133325
SAA4	-0.589179	0.000134649
ITIH5	0.601669	0.000138901
FN1	-0.60009	0.000147304
XRN2	0.438447	0.000147493
SLC25A12	0.421185	0.000147493
MAPRE1	0.292569	0.000153653
ORC2	0.704744	0.000154635
TCAF1	-0.47823	0.000161124
SSR1	-0.363344	0.000161257
AGMAT	0.483713	0.000165199
AOC1	0.577571	0.000166191
MACROH2A2	0.486925	0.000166191
PRG3	0.743991	0.000167185
CERT1	-0.434773	0.000172286
RBM15B	0.439992	0.000172557
STXBP1	-0.496427	0.000173298
HLA-DRA	-0.511799	0.000176341
SLC27A2	-0.427342	0.000176533
ERO1A	-0.296804	0.000180104
CHORDC1	-0.463522	0.00018109
MGAM	-0.627545	0.000183559
FKBP11	-0.363025	0.00018596
SEC24A	-0.324513	0.00018705
DUOX2	0.794202	0.000192934
ELP1	-0.281433	0.000192934
WLS	0.433176	0.00019478
H6PD	0.389836	0.000196783
SCYL1	-0.383478	0.000200032
HNRNPA2B1	0.325845	0.000201771
SNTB2	0.398388	0.000206397
APOL2	-0.618449	0.000207048
FAM3D	0.699638	0.000212576
DNM1L	0.282395	0.000212576
CHCHD3	0.339584	0.000212777
PIGT	0.334153	0.000216515
DEFA3	-0.902811	0.000217791
ALCAM	-0.775594	0.000219032
MRPS35	0.49885	0.000226335
AGT	-0.542239	0.00022668
TF	-0.371727	0.000236759
DCTPP1	0.581488	0.000244399
SEPTIN7	0.29161	0.000245787
GALNT5	-0.490574	0.000256243
SH3BGRL	0.314837	0.000262877
CDC16	0.414357	0.000265368
NCAPG	-0.403539	0.000265368
UBE3B	-1.18997	0.000268474
EHD1	-0.369838	0.000274483
EIF4EBP1	-0.618405	0.000278484
APOA1	-0.382944	0.000279645
NUTF2	0.289739	0.000285351
CLDN3	0.598586	0.000293104
ACO2	0.331644	0.000296315
MFN2	0.312382	0.000296505
NUP35	0.637544	0.00030673
DYM	-0.386817	0.000307143
MICAL3	-0.528614	0.000310293
SFN	-0.432125	0.00032717
USH1C	0.477001	0.000327271
CTNNA2	0.440579	0.000336647
RUVBL1	0.214769	0.000356065
RFC3	-0.323242	0.000356065
EPS8L3	0.664388	0.000363078
SBDS	0.362358	0.000363078
EPX	0.713188	0.000366613
PDHB	0.319149	0.000366613
TM9SF4	0.331361	0.000378763
TOMM70	0.238835	0.000378763
PON1	-0.452389	0.00037905
THSD4	0.675051	0.000385151
SEPTIN9	0.222759	0.000388448
SULT1B1	0.804743	0.000395332
ARFGEF1	0.392245	0.00040097
MCM3	-0.333374	0.000404542
ANKFY1	-0.306493	0.000408282
PROS1	-0.630532	0.000408282
RFC5	-0.309651	0.000412084
C1QC	-0.535719	0.000414158
LARP7	0.338198	0.000415674
ITGB6	0.55762	0.000415898
ATRX	0.389201	0.00042864
SNF8	0.489809	0.00042946
EBNA1BP2	-0.499912	0.000437511
EPB41L5	0.487474	0.000443353
SPINT1	-0.341018	0.000443399
AGL	-0.365819	0.000443399
RABGGTA	-0.339468	0.000447194
CLEC3B	-0.496046	0.000454275
RRM2	-0.397951	0.000458922
CPT1A	0.374982	0.000460752
STOM	-0.447937	0.000462334
POR	0.259348	0.00047349
CASP4	-0.369477	0.00047349
PAICS	-0.271467	0.000475742
OC90	0.446033	0.000485681
DARS1	0.220064	0.000495599
GLCE	0.33735	0.000510572
HDGF	0.260489	0.000510572
PREP	0.284857	0.000512794
PARP9	-0.356928	0.000516316
SLC16A3	-0.581367	0.000517926
CPB2	-0.617763	0.000519493
AGK	0.400266	0.000521548
CTNNA1	0.264375	0.000526159
ASPH	-0.340452	0.000526159
ECM1	-0.441605	0.000526159
ACP2	-0.329343	0.000526431
S100A14	-0.581462	0.000526431
GNE	-0.651104	0.000526611
ASNS	-0.487673	0.00053003
PLEKHA5	0.555089	0.000533544
PBXIP1	0.377101	0.000541975
MRPL41	0.373239	0.00054324
ARRB2	-0.32768	0.000552037
ACSL3	-0.301302	0.000557929
DOCK2	-0.411067	0.000563395
DHRS7	-0.297478	0.000571993
MRPS23	0.409405	0.000578535
CES1	0.686835	0.000581348
SEC61B	-0.461824	0.000586992
NCK2	0.445585	0.000599875
DLD	0.376841	0.000604983
KATNAL2	0.491343	0.00061489
ARMC10	0.441092	0.00061489
DOCK6	0.337058	0.00061489
FAH	0.447826	0.000626361
RHOT1	0.399553	0.000626361
ACAD9	0.340086	0.000629799
YIPF5	-0.495949	0.000630936
ATP6V1A	-0.353297	0.000635718
ARG1	-0.528939	0.000635718
ITGAL	-0.525975	0.000637949
OGDH	0.318804	0.000639234
MYO5C	-0.516872	0.000641417
ISG15	-0.595285	0.000642178
VAT1	-0.293954	0.000660956
SUCLG2	0.316534	0.000669856
FBLN5	0.566683	0.000677753
NHP2	0.500667	0.000689678
RAB12	-0.412242	0.0007015
COX7A2L	0.403545	0.00071227
RELCH	-0.368587	0.000716653
CYCS	0.339612	0.00073488
TFCP2	0.243166	0.000739638
GLG1	-0.263634	0.000739638
HSPA5	-0.263474	0.000742848
TP53BP1	0.35525	0.000751822
EIF2B5	0.268665	0.000751822
APOD	-0.413497	0.000751822
CYB5A	-0.544311	0.000751822
GANAB	0.214574	0.00077544
PLXNA2	0.402305	0.000781576
STK38L	0.224742	0.000781576
RFC1	-0.414863	0.000791125
IGHV1-69	-0.600211	0.000800275
DDX58	-0.482372	0.000800724
LMNB2	0.223066	0.000805807
ALDH5A1	0.571205	0.000808239
TXNRD2	0.405992	0.00081272
RBM22	-0.433627	0.000813864
VEZF1	0.41259	0.000814226
PKM	-0.300273	0.000840251
CMBL	-0.636521	0.000840251
TBC1D1	-0.625272	0.000841768
C6orf132	-0.527098	0.00084323
IFI35	-0.44002	0.000858775
PKP3	0.394237	0.000867859
IGHG3	-0.494812	0.000871447
MCM6	-0.388739	0.000885288
ATL3	-0.308411	0.000887717
IPO4	-0.336944	0.000888889
GALNT4	0.399055	0.00089048
MRPL3	0.289169	0.000897246
CYGB	0.407492	0.000908981
OCLN	-0.349201	0.000919837
NRAS	0.243347	0.000924445
TST	0.397662	0.000929553
AK4	0.719797	0.000933372
RARS2	0.522664	0.000955231
BRD2	-0.381578	0.000955231
PFDN5	0.30721	0.000964542
ATP2B1	-0.292469	0.000964542
HSD17B4	0.316248	0.000973029
NIPSNAP3A	0.418506	0.000984265
PPIB	-0.225716	0.000984265
KIF11	-0.508546	0.000984265
ITIH2	-0.3996	0.00100962
MRPL11	0.329102	0.00101141
VPS25	0.622016	0.00101266
BCL2L13	0.446049	0.00103091
HSPA4L	0.344386	0.00103799
PARVG	-0.492308	0.0010381
PLEKHA6	0.367446	0.00106138
TGFBI	0.414074	0.00109535
TMED9	-0.266357	0.00110294
SLC25A5	0.352831	0.00110613
OSTF1	-0.26202	0.00112008
ARMC8	-0.381133	0.00112008
CHGA	0.980604	0.00112113
CACYBP	-0.245473	0.00112543
PBLD	0.590529	0.00113767
HSD17B8	0.609293	0.00114166
NDUFB3	0.470601	0.00114911
CYRIB	-0.281334	0.00114956
DYSF	-0.353843	0.00115081
LPCAT1	-0.426056	0.00115522
APOM	-0.517766	0.00119349
CYB5B	0.29827	0.00120288
CAPZA1	-0.179005	0.00120288
MACF1	-0.291678	0.00120288
ERCC5	0.388107	0.00121252
MOXD1	0.575793	0.00123695
NUP210	-0.345158	0.00123695
NCKAP1L	-0.468366	0.0012584
B4GALT1	-0.30001	0.00127473
PMPCA	0.29539	0.00128443
LACTB	-0.278674	0.00128778
PYCR1	0.313881	0.00128794
PSAP	-0.388639	0.00128794
UQCC1	0.498257	0.00129471
PGM3	-0.352584	0.00129471
IRAG1	0.616484	0.00129927
MTERF3	0.370942	0.00131379
LRRC40	0.458581	0.0013186
NKIRAS2	0.387799	0.00132975
ZC3H4	0.30127	0.00133058
AFM	-0.352472	0.00133058
CS	0.229911	0.00133201
BPNT2	-0.430186	0.00133633
FMR1	0.371943	0.00135873
PARP1	-0.235674	0.0013697
HADHB	0.381728	0.00141236
TNC	-0.543284	0.00141961
HADHA	0.247457	0.00142255
PLOD1	-0.354843	0.00144128
SPAG1	0.910413	0.00144938
CORO1A	-0.328323	0.0014538
MRPL37	0.407469	0.00145915
PRPS1	-0.388083	0.00146797
DNAJC9	-0.252026	0.00148742
STAT3	-0.23383	0.0014889
LRRFIP1	-0.287601	0.0014989
MRPS12	0.426299	0.00150739
C8G	-0.464412	0.00151193
CFI	-0.538619	0.00151193
FCSK	0.38921	0.001523
ICAM1	-0.348307	0.00154249
ECH1	0.340483	0.00154628
NNT	0.284347	0.00156708
LCP2	-0.395017	0.00157497
HLA-DRB5	-0.774459	0.00158782
CLYBL	0.57267	0.00160735
FTCD	-0.435747	0.00160735
TNS3	0.287461	0.00160958
SERPINB9	-0.352577	0.00163495
HNRNPH3	0.408244	0.00164047
MRPS15	0.385881	0.00165063
GNAQ	-0.288806	0.00165564
MFAP4	0.727023	0.00166812
DAP3	0.444933	0.00170082
DAB2	0.407453	0.00170082
XPO7	-0.279049	0.00170762
DDX60	-0.393753	0.00172623
C8orf82	0.350233	0.00173025
ADAM10	-0.275469	0.00175336
ARSB	0.609196	0.00175796
AARS2	0.336191	0.00176689
INTS13	0.376121	0.00176842
ATP6V1B1	-0.396035	0.00180262
ADK	0.306334	0.00180951
THBS1	-0.522929	0.0018129
APOOL	0.421059	0.00182312
UBA5	-0.283554	0.00182781
SAAL1	-0.419927	0.00183238
SLC38A10	-0.603213	0.00183524
SLC5A6	0.565494	0.00185505
TKT	0.240075	0.00188606
RNASET2	0.486552	0.00189787
FARP2	0.392369	0.00190441
CLMN	0.377607	0.00190627
NCK1	0.29925	0.00190627
MMP12	-0.64446	0.00191726
MRPL23	0.368301	0.00193173
DNAJA3	0.32385	0.00194266
TK1	-0.420915	0.00194266
GCHFR	-0.50886	0.00194462
PDF	0.587977	0.00201326
CUL3	-0.241196	0.00201326
HMCN1	-0.582486	0.0020554
HMGCL	0.349704	0.00206732
ACOX2	0.517251	0.00207681
UBASH3B	0.369637	0.00207681
HSDL1	0.325942	0.00207681
MGAT1	-0.258855	0.00209512
USP5	0.186834	0.0021163
SDC4	0.587263	0.00213691
GLUD1	0.273883	0.00213691
LPCAT4	-0.368203	0.00218054
CTPS1	-0.285601	0.00218399
SUPT16H	-0.305763	0.00218496
SIDT2	-0.358793	0.00219918
PBK	-0.586536	0.00224891
CHID1	0.508022	0.00226819
MANF	-0.416502	0.00228081
TSR1	-0.306182	0.00230632
EPHA2	-0.449602	0.00230651
HNRNPM	0.20914	0.00234475
PTGR2	0.390071	0.00236668
CUX1	0.410259	0.00237831
MRPS31	0.296677	0.00238156
TCERG1	0.267742	0.00238212
SOD1	-0.233666	0.00238212
CDA	-0.495255	0.00238212
MTHFD2	-0.410558	0.00246256
FARSB	0.289969	0.00247214
GTF2I	0.271375	0.00248635
GOLT1B	-0.353489	0.0024877
ACSF3	0.385088	0.0025088
MARK2	-0.327901	0.002535
IGHV4-39	-0.569279	0.00253891
SHC1	0.671897	0.00256257
NMES1	0.571807	0.00258117
SCAF11	-0.680373	0.00258117
TAPBPL	0.592709	0.00259888
LNPK	0.325367	0.00260022
TES	0.367033	0.00262526
STX5	-0.27723	0.00264859
ATP8A1	-0.399269	0.00267401
CAVIN1	0.317693	0.00271824
NSDHL	0.336801	0.0027183
LIG3	0.303368	0.00272308
HMGB1	0.292996	0.00272308
XPOT	0.30022	0.00272911
IARS2	0.210222	0.00272911
STAT2	-0.293349	0.00272911
MRI1	0.406389	0.00273181
NCOR2	0.349258	0.00275502
PLAA	0.263694	0.00282164
AP2B1	0.137663	0.00284149
PLXNB2	-0.246897	0.00284149
UGGT2	0.360369	0.00284698
FANCD2	-0.544784	0.00287781
ILVBL	0.37777	0.00289646
TUBA1C	0.286539	0.00289646
IPO7	0.227546	0.00289646
GOLPH3	-0.306759	0.00289646
CIP2A	-0.5052	0.00289646
MRPS25	0.657038	0.00298433
PPP3CA	-0.223145	0.00298433
COL12A1	-0.390584	0.00299142
RIPK1	-0.244543	0.00302376
UQCRC1	0.299371	0.00304681
LCP1	-0.307266	0.00304681
LRPAP1	-0.486932	0.00304681
NIPSNAP2	0.465523	0.00304707
PCYT1A	0.281489	0.00306748
CLIC6	0.5477	0.00307812
GLIPR2	-0.370004	0.0031031
ATP6V1G1	-0.36402	0.00318147
NHLRC2	-0.268662	0.0031918
TBK1	-0.453484	0.00319273
WNK1	0.271676	0.00319967
FLII	-0.28254	0.00320664
C1R	-0.482451	0.00320664
SMAP2	-0.275772	0.00321169
CEP131	0.611042	0.00322866
COQ9	0.413366	0.00322908
ST6GAL1	0.606173	0.00324953
AP2A2	0.250287	0.0032866
RAB1A	-0.222518	0.00328855
MRPS7	0.377511	0.00330202
SMTN	0.504182	0.00335268
ANAPC5	0.268212	0.00335268
IKBIP	-0.344036	0.00335268
MECP2	0.525869	0.00338826
CRMP1	-0.366611	0.00338826
JUP	0.292746	0.00342541
ALDH18A1	0.241191	0.00342541
EMD	0.290397	0.00345382
TRIM28	0.213507	0.00345382
EFEMP2	0.475717	0.00346379
NOP56	0.213054	0.00346392
PPP2R5C	-0.229485	0.00347775
NCAPG2	-0.679758	0.00347775
OSBPL8	-0.233119	0.00347801
SOD3	0.511692	0.00350026
TIMM22	0.341191	0.00351936
TNXB	0.464684	0.00358074
EIF3L	-0.250845	0.0036244
RDX	-0.219649	0.00364489
PRG2	0.709197	0.00368983
ARHGDIB	-0.248049	0.00373763
SRP72	-0.223267	0.00375678
EXOC6	-0.255022	0.00375678
COX6B1	0.555643	0.0037969
HCFC1	0.254949	0.00380501
SFXN1	-0.390817	0.00382102
LARS2	0.368711	0.00383114
TM9SF1	-0.272278	0.00383744
GNS	-0.279402	0.00386995
RAB3B	-0.475501	0.00387907
CD109	-0.545965	0.00388
MRPS16	0.543462	0.00388865
SDCBP	-0.397727	0.0039395
SCPEP1	-0.618355	0.00405349
SPG7	0.323531	0.00405658
TELO2	0.374726	0.00408037
TMLHE	0.500216	0.00408119
BOLA2B	0.359957	0.00410259
SLC1A5	-0.436444	0.00411558
DHX9	0.21186	0.00418924
EIPR1	0.321023	0.00421549
REEP4	-0.310862	0.00423768
MBOAT7	-0.34565	0.00424154
SORBS1	0.485596	0.00427403
PTPN6	-0.256622	0.00429054
ZFR	0.245647	0.00429114
TJP1	-0.282253	0.00430537
SELENOI	-0.372986	0.00435671
PSAT1	-0.506151	0.00435872
DDX51	0.270662	0.00436169
MYO15B	0.589546	0.00439783
C1QB	-0.266553	0.00439985
DYNC1I2	0.248989	0.00441151
PSME1	-0.218407	0.00441151
DUT	-0.263036	0.00446089
PRRC1	-0.305492	0.00446089
PPP2R1A	-0.153544	0.00451375
TPP2	0.253499	0.00453645
SLC30A9	0.404359	0.00462259
RAB3GAP2	0.250189	0.00462654
DNAJC1	-0.540445	0.00466745
DIABLO	0.359065	0.00467662
DCUN1D5	-0.39785	0.00467939
LIPA	-0.430517	0.00470485
MRTO4	-0.286894	0.00473083
RAB35	-0.284835	0.00474424
ACTN4	0.208884	0.00476665
TBL1XR1	0.289668	0.00477618
KPNB1	-0.163661	0.00479783
ACAD10	0.715605	0.00481166
PAXBP1	-0.482991	0.00485899
NDUFA13	0.412799	0.00487242
RBBP5	0.273769	0.00494436
XRN1	-0.298777	0.00494436
SDCBP2	-0.522503	0.00494436
MTAP	-0.353828	0.00495947
DCXR	0.351933	0.00496191
FERMT1	0.313778	0.00500628
THEMIS2	-0.39256	0.00502271
MRPL21	0.242562	0.00508028
LUZP1	-0.257909	0.0052857
GSR	-0.246506	0.00531747
MAP4	0.226639	0.00536344
THEM6	0.378387	0.00538928
BAP18	-0.312581	0.00539632
FXR2	0.288232	0.00541669
ATP9A	0.317052	0.00542973
MYO1E	-0.23162	0.00547077
NABP2	0.327624	0.00547273
CLCC1	-0.548058	0.00551657
GLUL	-0.349498	0.00552738
MRPS27	0.249216	0.00557617
EHD2	0.326731	0.00562715
MCM2	-0.321344	0.00562715
PSIP1	-0.324611	0.00563602
MYO1D	0.292105	0.00569054
OTULINL	0.424135	0.00569919
MAD2L1	-0.334345	0.00569919
KIF4A	-0.467526	0.00569919
FAP	-0.530917	0.00571638
CDK2	-0.273295	0.00573312
NDUFAF3	0.382155	0.00574722
ESD	0.254684	0.00590015
ESRP2	0.501844	0.00592706
ENO2	-0.444934	0.00592706
SAR1B	-0.476253	0.00592706
PPP2CA	-0.177488	0.00592816
ARHGAP12	-0.341337	0.00593589
DHTKD1	0.331141	0.00593731
MRPL12	0.225386	0.00604615
FUBP1	0.26861	0.00606412
KLC2	-0.37406	0.00611495
UBE2H	-0.326675	0.00615603
ARHGDIA	-0.16469	0.00617315
QSOX1	-0.431218	0.00619209
RABGGTB	-0.421382	0.00620443
EMILIN2	-0.383666	0.00640043
OPLAH	0.398444	0.00645776
GTPBP1	-0.22919	0.00645776
SIL1	-0.321005	0.00645937
TMSB10	-0.252851	0.00648966
GPA33	0.520163	0.00652252
GALM	0.355634	0.00652252
MRPL38	0.373924	0.00667056
EMC2	0.2341	0.00668656
MANBA	-0.507483	0.0066934
HSPA9	0.249036	0.00675078
LEO1	-0.335798	0.00680031
TXNRD1	-0.240864	0.00681523
NPEPL1	0.493505	0.00681709
GSTO1	-0.23614	0.00681883
ILF3	0.18816	0.00684041
DDX56	0.298634	0.00684782
MCM7	-0.284637	0.00687148
CASP6	0.33752	0.00695607
HDHD3	0.450546	0.00696335
SLC27A1	-0.316961	0.00696775
ARHGEF6	-0.395347	0.00698747
HSPA13	-0.292703	0.00703719
MPI	-0.356465	0.00703719
NT5DC1	-0.407962	0.00703719
USP13	0.386538	0.00704167
PCBP1	0.242119	0.00716333
PARD3	0.532166	0.007211
SHMT1	-0.30036	0.0072422
TMEM106B	-0.327516	0.00729988
POLR1E	0.853682	0.00730985
TARBP1	0.349301	0.0073363
PNP	-0.234606	0.00745895
ATP1A1	0.275778	0.00746109
SPATS2L	-0.388928	0.00746109
EIF3E	-0.195678	0.00748589
C4B_2	-0.559083	0.00749921
GPI	-0.202555	0.0075035
GNA13	-0.254988	0.00758217
OLFM4	0.788733	0.00758657
ITGA2B	-0.606666	0.00758657
PDIA3	-0.183801	0.00768465
TXNIP	-0.37794	0.00775868
RAB18	-0.206005	0.00777898
SERPINF1	-0.434431	0.00778919
SYNE2	0.2172	0.00779918
CAMK1D	0.31573	0.0078053
TMTC3	0.29505	0.00784688
ACOT1	0.333966	0.00785329
SAMD9	-0.404528	0.00793479
UGDH	-0.270225	0.00794828
EFHD2	-0.186863	0.00795738
THADA	0.368928	0.00802299
MACROH2A1	0.25676	0.00802299
TFB2M	0.36733	0.00806227
PPID	-0.208405	0.00808656
CTHRC1	-0.573103	0.00808656
ABCB8	0.423662	0.00815964
DNPEP	0.362275	0.00822598
IPO9	-0.222059	0.00822598
AHSG	-0.307355	0.00822598
TPRG1L	0.44172	0.00822918
POLB	0.33801	0.00822918
PGAM1	-0.195204	0.00823367
SH3BGRL2	0.240123	0.00835623
PEX1	0.285077	0.00837544
SFXN3	0.27202	0.00838009
LARP4B	0.283106	0.00845334
ASAH1	-0.19571	0.00846939
ANXA2	-0.224216	0.00853469
F13A1	-0.399987	0.00853469
PRUNE1	0.312391	0.00854282
KANK2	0.464295	0.00857775
EIF1B	-0.245553	0.00859178
PGRMC2	0.263909	0.0085938
YWHAQ	0.16981	0.0085938
LPCAT3	0.45146	0.00860022
RPL17	-0.214922	0.00862303
FEN1	-0.551191	0.00863562
PTBP2	0.225771	0.00866257
GOT1	-0.32381	0.00875057
PC	0.422278	0.00878405
FAM114A2	-0.530021	0.00893093
KIF1B	-0.34101	0.00895335
SSRP1	-0.230929	0.00897545
TRIM47	-0.35913	0.00898847
HNRNPF	-0.18565	0.00904569
RAB13	-0.266014	0.00907062
FHOD1	-0.381448	0.00909535
TMEM126B	0.361672	0.00911132
TRMT61A	0.401581	0.00912274
ATP5ME	-0.256344	0.00912274
H1-10	-0.278522	0.00912274
PPP4R1	-0.326394	0.00912274
MUC12	0.65128	0.00915148
YARS2	0.40175	0.00916376
LASP1	0.148093	0.00933347
ZC3HAV1L	0.632192	0.0094334
ICAM3	-0.455776	0.0094334
COPS2	-0.201823	0.00943944
CHUK	-0.333478	0.00966416
GSTK1	0.25243	0.00967224
RDH11	-0.217122	0.00970415
ACE	-0.320517	0.00976487
ITIH1	-0.351452	0.00986596
GDA	-0.575662	0.00992592
MRPS2	0.30784	0.00993701
PIK3C2B	0.328964	0.010013
PTK6	0.35016	0.0100506
CDC42BPB	-0.189174	0.0101824
RANGAP1	-0.192696	0.0101824
NAPG	-0.300139	0.0101875
NKRF	0.320021	0.0102731
USP14	-0.177815	0.0103206
TIA1	0.337921	0.0103733
BZW2	0.292308	0.0104179
TUBA1A	0.348634	0.0104316
RAB3GAP1	0.255698	0.0104316
COPG2	0.271868	0.0104503
WDR6	-0.412005	0.0104805
MACROD1	0.359572	0.0106323
HNRNPL	0.209598	0.0106323
YTHDF1	0.726543	0.0106607
RFC2	-0.371858	0.0106796
TAF9	0.347797	0.0107001
PCIF1	0.561147	0.0107094
COPZ1	-0.157744	0.0108111
ZG16	0.738744	0.0108807
IGHV3-7	-0.349083	0.0109015
NDUFS3	0.224674	0.0110995
VPS26C	0.451733	0.011152
RPL11	-0.148523	0.0111798
RAB3D	-0.201784	0.0111849
TARS2	0.485864	0.0111892
NDUFS8	0.363094	0.0112179
NDUFS1	0.236845	0.0112351
PDCD6IP	0.146475	0.0113086
SLC39A14	-0.330846	0.0113507
PSME2	-0.260064	0.0113761
HARS2	0.267755	0.0114117
SUPV3L1	0.275503	0.0114242
TXNDC17	-0.193631	0.0114242
GPNMB	-0.418943	0.011439
EMILIN1	0.356463	0.0114539
PDK1	-0.371185	0.0115283
PM20D2	0.426756	0.011565
MICAL2	-0.343461	0.011688
PPP3R1	-0.272785	0.01173
NAF1	0.324193	0.011744
MRPL43	0.34346	0.0117587
MRPL22	0.309796	0.0117587
NAT10	0.251999	0.0117587
PDCD10	0.165193	0.0117587
DERA	-0.321141	0.0117587
IGHV5-51	-0.442232	0.0117587
APCS	-0.466435	0.0117587
NDUFS7	0.348195	0.0117793
IMPDH2	-0.234818	0.0118622
ENO3	-0.195634	0.0119415
MINPP1	-0.333103	0.0120797
SMARCE1	0.174289	0.0121697
HYOU1	-0.196997	0.0121826
LAMTOR1	-0.196525	0.0122611
HINT3	-0.501768	0.0122611
CFHR1	-0.44233	0.0123252
ABHD16A	0.236881	0.0123769
ATAD2	-0.319508	0.0123769
STK24	0.140806	0.0125216
PFAS	-0.316749	0.0125439
ESRP1	0.54224	0.0125815
SLIRP	0.375315	0.0126451
SUDS3	-0.253649	0.0126657
ITFG1	0.291184	0.0127518
OSBPL2	0.24198	0.0127694
ARID1B	0.345118	0.012785
GTPBP10	0.31161	0.0128102
MMP14	-0.312351	0.0128102
VRK1	-0.25994	0.0128309
AGA	0.390466	0.0128466
FKBP4	-0.227733	0.0128466
REEP5	-0.317803	0.0129068
MAP4K4	-0.446123	0.0129068
QARS1	0.153363	0.012915
SP100	-0.278145	0.012915
ABCB10	0.243547	0.0129192
EIF2B4	0.226182	0.0129192
BTAF1	-0.353999	0.0129192
CYP4F2	-0.442304	0.0129192
SERPINB5	-0.529831	0.0130512
STMN1	-0.228863	0.0130703
FARP1	0.236271	0.0131205
DNAJC13	-0.218465	0.0131766
RPS6KA1	-0.376136	0.0131924
ELMO2	-0.279718	0.0133177
RHOB	0.392214	0.0133286
ITSN1	0.394	0.0133625
HSPA6	0.273707	0.013379
RPP30	0.253767	0.0134508
MKKS	0.354534	0.0136122
MLYCD	0.333611	0.0136122
PDLIM3	0.465763	0.0136609
PITRM1	0.264307	0.0136609
NIBAN1	-0.345112	0.0136948
NUMA1	0.192946	0.0137187
ANAPC1	0.204754	0.014051
LGALS3BP	-0.265266	0.0140735
KCNAB2	-0.307832	0.0140735
PDIA5	0.258952	0.0141503
NUDT2	0.47903	0.0142025
MYLK	0.387162	0.0143363
TMEM30A	-0.258235	0.0144553
PARP12	-0.283261	0.0145645
STING1	-0.487091	0.0145857
NPEPPS	0.138427	0.01493
ME1	-0.349225	0.01493
ACSS1	0.304907	0.0150449
CPEB4	-0.262979	0.0150449
TCF20	0.287375	0.01515
PFN2	0.393788	0.0151708
CTSB	-0.269918	0.0154216
ALDH1L1	-0.499163	0.0155804
CKAP4	-0.227659	0.0158787
ANXA4	0.247327	0.0158804
PELP1	-0.245412	0.0158804
RBP1	0.504327	0.0159287
MX1	-0.490159	0.0160341
CPSF7	0.181367	0.0160539
ACOT7	-0.205174	0.0160717
CBR4	0.498195	0.0161059
PLD1	-0.277175	0.0161059
AAMP	-0.28898	0.0161059
PTK2B	-0.293156	0.0161059
ISG20	-0.399237	0.0161367
DENR	0.270552	0.0161799
PTK2	0.181347	0.0161799
NDUFAF7	0.515824	0.0161919
DUS3L	0.30226	0.0161919
SERPINB6	-0.208322	0.0161919
GPX8	-0.432424	0.0162937
OTC	-0.50441	0.0162937
DDX18	0.183591	0.0162951
GBA	-0.283749	0.0162951
PMPCB	0.287441	0.0163824
ARSL	0.416232	0.0163898
PLS3	0.160254	0.0164131
POLR1G	0.290833	0.0165132
SDF4	-0.364459	0.0165132
IFNGR1	-0.336791	0.0165332
SEC24B	0.295414	0.0165382
MRPS30	0.347556	0.0168393
HNRNPK	0.15183	0.0168395
PRXL2A	0.302281	0.0168402
HNRNPA3	0.2097	0.0168402
CTSC	-0.230229	0.0171247
RNASE2	0.440063	0.0171769
FANCI	-0.338128	0.0172748
IGLV1-47	-0.432249	0.0173351
NFS1	0.514993	0.0175359
SPON1	-0.468237	0.0175784
MRPS9	0.332303	0.0177512
PUS1	0.260459	0.0178073
ACSL4	-0.178282	0.0178397
AMPD2	-0.524501	0.0178397
TAP1	-0.294098	0.0179086
VTA1	-0.168337	0.0179334
TPBG	-0.422129	0.0180523
OLA1	0.148263	0.0180884
HS1BP3	0.269411	0.0181323
VCPIP1	0.326986	0.0182506
MAGEB3	-0.497899	0.0182506
DHCR7	0.409286	0.0182625
FBL	0.199679	0.0183832
BCAM	0.383824	0.0184915
DDX19B	0.276125	0.0184915
STMN2	-0.27473	0.0184915
ENOPH1	-0.242591	0.0185084
PHAX	-0.309906	0.0185443
MFN1	0.221888	0.0185942
COL5A2	-0.357764	0.0186718
STIP1	-0.241867	0.0186992
ADIRF	0.456494	0.0187007
CLP1	0.280888	0.0187031
HPR	-0.812916	0.0187031
CLASP1	-0.172243	0.0187211
MOB3A	-0.397721	0.0187211
PDP1	0.253663	0.01913
NDUFA11	0.331147	0.0195031
CRNKL1	-0.195139	0.0195553
TRMT1L	-0.28726	0.0195752
GFM1	0.181829	0.0196932
SCRN1	0.391292	0.0201525
RPS6KA3	0.168997	0.020189
SRPRB	-0.229035	0.020214
SH3PXD2B	0.260025	0.0202156
DSTN	0.202384	0.0202987
PCNA	-0.226541	0.0202987
ITGB3	-0.448663	0.0203361
IGKC	-0.256725	0.020344
CFL1	0.160823	0.0205112
NCF1	-0.401435	0.0205756
MTDH	-0.214145	0.0205991
SEC23B	-0.203171	0.0207755
CSTF2	0.3187	0.0208109
NUDT16	-0.448951	0.0208608
CAPN2	-0.175291	0.0211466
NDUFS2	0.228229	0.0212209
PDSS2	0.316699	0.0213245
GTF2F2	0.206382	0.0213245
GRK2	-0.216641	0.0213534
POLR1D	0.293128	0.0214616
ADH1B	0.642084	0.021582
HDAC1	-0.255718	0.0216061
B4GALT5	-0.307904	0.0217225
UTP14A	0.217542	0.0217843
FLAD1	0.234039	0.0219068
XPO4	0.269147	0.0219377
KCTD12	-0.334944	0.0220538
AOC3	0.454019	0.022109
CDH1	0.217034	0.0223914
HCCS	0.512164	0.0224181
CNOT2	0.268569	0.0224181
CPSF3	0.195501	0.0224181
DCAF1	0.236941	0.0226641
IQGAP3	-0.437579	0.0226641
STOML2	0.221708	0.022728
ALG11	0.296971	0.022803
GSTM3	0.390261	0.0228677
ATPAF1	0.2835	0.022896
GOLIM4	0.245426	0.0229234
ARFGAP3	-0.360762	0.0229948
PFDN1	0.248743	0.0230317
UBR4	-0.162303	0.0230451
G6PD	-0.209122	0.0233145
ACTN1	-0.206111	0.0234678
VPS4B	-0.142581	0.0235291
PYCARD	0.217785	0.0236441
DPYSL4	0.290252	0.0237592
NES	0.224775	0.0237592
UBE2N	0.185325	0.0237592
RPL10A	-0.12242	0.0237592
ATP5PD	-0.206047	0.0237592
PAPSS1	-0.266991	0.0237592
AMPD3	-0.309659	0.0237592
LCN2	-0.462537	0.0237592
CLK2	-0.281539	0.023783
MPST	0.293999	0.0238088
SULT2B1	0.468854	0.0238379
HVCN1	-0.319996	0.02386
NIF3L1	0.314399	0.0240861
REPS1	0.284257	0.0240861
MYO18A	-0.192752	0.0240861
PAFAH1B3	0.318838	0.0241412
AHR	-0.497971	0.0241467
COQ5	0.440102	0.0242205
PSMD3	-0.121708	0.0243003
SURF1	0.400161	0.0243648
MRPL53	0.280591	0.0244084
FTSJ3	-0.643844	0.0244636
APOBR	0.315591	0.0244775
PSMA6	-0.127846	0.0246551
MMUT	0.280487	0.0247955
AKAP8	0.296945	0.0248029
WDR44	-0.206398	0.0249455
AKR1C3	0.424698	0.0249985
RRAGC	-0.176095	0.0250196
GNB2	-0.19636	0.0250374
IPO8	-0.317612	0.025062
RRM2B	-0.30531	0.0252424
PLEKHO2	-0.255107	0.0255509
ADNP	0.339398	0.0255712
STUB1	-0.288125	0.0256331
ORC3	0.321658	0.025641
NUP188	-0.408997	0.025641
MRPL20	0.290556	0.0256461
HNRNPCL4	-0.150581	0.0257773
HMGB3	0.236406	0.0257899
TIMM50	-0.295273	0.0257899
APOC3	-0.389037	0.0257899
ALDOC	-0.408348	0.0257899
MRPL39	0.226229	0.0260282
BLMH	-0.246599	0.0260282
TIAL1	0.29835	0.0260609
INTS4	0.209571	0.0260609
ATP5PO	-0.167767	0.0260609
RBMX	0.145226	0.0261503
VWF	-0.279662	0.0261503
PCYOX1L	-0.319828	0.0264262
FOXRED1	0.550259	0.0264458
DBT	0.330818	0.0265594
DHX30	0.179127	0.0267741
LTA4H	-0.154761	0.0267929
RCN1	0.197375	0.0268314
NCAPH	-0.312122	0.0268406
PHB2	0.186481	0.0268666
GON7	-0.567417	0.0268666
LGMN	-0.284413	0.0269558
NDUFA12	0.29856	0.0269645
TM9SF3	-0.227357	0.0276005
ERGIC3	0.174734	0.0276121
SND1	0.122312	0.0276121
SCARB2	-0.248738	0.0276692
FAHD1	0.270185	0.0277262
APOA2	-0.51432	0.0277368
CDK7	-0.24367	0.0277614
PGM2L1	0.219133	0.0278383
AIMP2	0.183828	0.0282968
TP53RK	0.230588	0.0285979
GRB2	-0.235293	0.0286632
NOC2L	-0.19733	0.0287749
NEMF	-0.277327	0.0289483
ZG16B	-0.464103	0.0289647
HAX1	0.291252	0.0290159
TGOLN2	0.375671	0.0290246
SMC4	-0.232343	0.0290446
DPYD	-0.369551	0.0290765
ATP6V1C1	-0.179098	0.0291563
NECTIN2	-0.245925	0.0291563
TEP1	-0.382926	0.0291741
CNDP2	-0.197987	0.0293372
STXBP2	-0.309168	0.0294637
FARSA	0.238691	0.0294672
KTN1	0.178548	0.0294754
TPT1	0.239706	0.0295358
DNAJC2	0.242589	0.0297347
TTC38	0.256144	0.029744
NNMT	-0.344455	0.0297848
VAC14	-0.19654	0.0297875
DNAJC11	0.167479	0.0298095
SRP54	-0.189897	0.0298257
SETD7	-0.447277	0.0298257
PPIP5K2	-0.226997	0.0299187
SERPINH1	-0.243598	0.0301195
ATP6V1F	-0.300672	0.0303366
TRABD	0.390002	0.0304663
GMIP	-0.36415	0.0304663
ITGA5	-0.343105	0.0305512
H3C13	0.761856	0.0306287
FKBP2	-0.197723	0.0309069
ACTA1	-0.244247	0.0311208
GNPNAT1	-0.295534	0.0311208
TMED2	-0.240589	0.0313793
SIRT5	0.255987	0.0314218
TXN	-0.183043	0.0314995
PIGN	0.327608	0.0315614
RBM3	0.314608	0.0315614
TRIM16	-0.299725	0.031804
FBXO7	-0.247942	0.0320606
ECT2	-0.519672	0.0321464
SART3	0.313	0.0321908
ARHGAP17	0.247662	0.0322338
KIF5B	0.135565	0.0322338
PAPOLA	-0.152862	0.0322338
MGST3	0.296878	0.0327765
POLR3A	0.375731	0.0330967
ACTB	0.153195	0.0330967
USP10	0.201868	0.033136
H4-16	0.224764	0.0331953
CWC22	-0.238415	0.0333195
DMAP1	0.262118	0.0333682
MRPL13	0.388538	0.0334389
SAFB2	0.228159	0.0334389
SLC9A1	-0.30099	0.0334389
ELAVL1	0.157164	0.0334651
BTF3L4	0.228429	0.033496
MRPL24	0.282558	0.0339575
COG2	0.327862	0.0340326
CCDC88B	0.432538	0.0342727
PHF5A	-0.278974	0.0342816
USP19	-0.203684	0.0343862
CCNK	0.297315	0.0344089
DDX19A	0.173975	0.0344626
BUD23	-0.303465	0.0347333
EIF4A1	-0.123552	0.0347777
BTN2A1	-0.250607	0.0347777
MGME1	0.418112	0.0348914
OTUD4	-0.1828	0.0349568
LIMK2	-0.410557	0.0349568
CYBA	-0.541268	0.0349941
NUP214	0.23555	0.0351531
MAT2B	-0.161766	0.0352627
DDX54	-0.213851	0.0354285
IGLC2	-0.350612	0.0355211
ASCC2	-0.191022	0.0356423
ETHE1	0.363156	0.0357371
THNSL1	0.269034	0.0357371
TGFB1I1	0.403181	0.0357702
LPP	0.262531	0.0358166
NACC1	0.208664	0.0358166
PRKAG1	0.147343	0.0358166
BAX	0.238717	0.036001
SLC27A3	-0.296878	0.036001
COQ7	0.29494	0.0360572
SSB	0.150092	0.036112
CASC3	-0.792677	0.0362555
CHD4	0.195115	0.0364485
UBXN4	0.225242	0.0365779
MRC1	-0.320462	0.0368041
MPDU1	-0.249438	0.0368596
GCLC	0.212672	0.0368864
C7orf50	0.366872	0.036895
STK10	-0.274711	0.0369288
PARP4	0.167772	0.0369347
ECHDC1	0.259507	0.0369512
FBLN2	-0.504718	0.036961
FILIP1L	0.309475	0.0369739
AP3S1	-0.195476	0.0369739
RPS12	-0.153674	0.0371381
THBS2	-0.554458	0.0371381
FAM3C	-0.245767	0.037346
MTA2	-0.200378	0.0373948
TBRG4	0.208737	0.0374306
ACSS2	0.202922	0.0378121
PPP4R3A	-0.24819	0.03801
ADD1	0.162956	0.0380572
PRPF3	0.228961	0.0382832
IFIH1	-0.317849	0.038376
KALRN	0.27463	0.0383913
GNPAT	-0.260923	0.0384119
EBAG9	0.263377	0.0384756
TMEM50A	-0.225394	0.0391542
MRPS28	0.368094	0.0392088
MROH1	0.340921	0.0392088
HNMT	0.266896	0.039384
POF1B	0.21416	0.039384
WDR7	-0.307211	0.039384
SEC16A	-0.161231	0.0393847
TOP2B	0.198095	0.0394952
RIC8A	0.195787	0.039696
NDUFAF4	0.352611	0.0397413
RAB23	0.267105	0.0397413
FCGR3A	-0.379717	0.0399079
CANX	-0.160651	0.0399167
SLU7	-0.250381	0.0399167
SUN1	0.251248	0.0399254
S100A13	-0.267175	0.0402214
LSM6	-0.283428	0.0405684
CHD1L	-0.263719	0.0405702
HACD3	-0.19251	0.0405953
KIF22	-0.263527	0.0406116
BLOC1S3	0.252019	0.0407339
ABCB1	0.35193	0.0407532
CEACAM6	0.384655	0.0410701
UBE2V1	0.185513	0.0411209
HDGFL3	0.369589	0.0413627
ITCH	0.196263	0.0414527
STAU1	0.26539	0.041639
RDH14	0.272562	0.0417604
TPI1	0.13799	0.0417604
RNF114	0.30191	0.0417913
HCLS1	-0.28317	0.0417989
RTF1	-0.178882	0.0418403
FRG1	-0.258786	0.0420251
NOSIP	-0.244216	0.0423866
WASL	0.213008	0.04267
RBBP4	-0.168107	0.0427696
BAG5	-0.33199	0.0428249
ACOX1	0.238858	0.0430564
FTH1	-0.308997	0.0430564
PTPN23	0.226031	0.0431258
TAX1BP3	0.26734	0.0432022
LEMD2	0.206833	0.0432022
DPY19L1	-0.277843	0.0432022
PECAM1	-0.202484	0.0433724
RAB14	-0.131607	0.0436177
BNIP1	-0.178313	0.044162
SNX6	-0.19483	0.044162
UTP20	-0.225157	0.044162
IMPACT	-0.319044	0.044162
SCARB1	0.295308	0.0443701
MT-CO2	0.278136	0.0444125
FAM111A	-0.265499	0.0444803
IPO11	-0.256314	0.0446159
LIG1	-0.219014	0.0446988
PSMC2	-0.175238	0.0447373
SNRNP27	-0.198707	0.0447373
NPM3	-0.245559	0.0447448
MESD	-0.242505	0.044793
PFDN6	0.19733	0.0448943
DECR2	0.470677	0.0449641
ETFDH	0.264656	0.0453183
MMAA	0.302604	0.0457398
YIPF4	-0.219019	0.0458556
KCTD14	-0.313828	0.0458556
SPG21	-0.183892	0.0460174
DOCK8	-0.324051	0.0460982
RSRC2	-0.254169	0.0461405
MGST1	0.205174	0.0461926
RPL23	-0.186059	0.0462799
MMRN1	-0.501438	0.0462799
SORBS3	0.662095	0.0463026
PCM1	-0.42582	0.0463846
UBE2M	-0.18533	0.0464219
SLC4A2	-0.468332	0.046543
ARHGEF16	-0.223604	0.0466275
ITGAX	-0.286035	0.0466275
MTOR	-0.214662	0.0469499
ARHGEF5	0.230782	0.047238
SGSH	0.278748	0.0472699
UFC1	0.262346	0.0472699
NAP1L4	0.131035	0.0478371
IBA57	0.34613	0.0478678
SRRM1	-0.202508	0.048145
GYG1	-0.246082	0.0483592
INTS6	0.300488	0.0485782
CISD2	-0.206215	0.0488896
HSPA1L	0.159809	0.0489007
TGFBRAP1	0.271073	0.0491385
CTTN	0.13891	0.0495423
PFDN2	0.131349	0.0495423
HDAC2	-0.134412	0.0497331
CHMP7	-0.439163	0.0500585
GMPR2	0.281567	0.050213
PRKAR2B	0.534455	0.0504629
MRPL15	0.254148	0.0504629
S100A10	-0.175516	0.0504629
DCK	-0.224745	0.0504629
IMP4	-0.272822	0.0504629
EPHB2	0.329714	0.0505232
VPS52	0.162393	0.0505232
CHP1	-0.259634	0.0505232
IGKV3D-11	-0.434772	0.0507642
WDFY1	0.17481	0.0507971
CCT6A	-0.113418	0.0507971
PLCG1	0.191376	0.0510057
ADGRG1	0.258012	0.0510327
GLOD4	-0.139959	0.0510436
ARPC1B	0.112171	0.0514067
C12orf57	-0.260243	0.0514067
ACIN1	-0.150549	0.0514159
LGALS4	0.278096	0.0516076
PITPNB	-0.221861	0.0517641
C2CD5	0.216826	0.0518868
ARPC4	0.256019	0.0519233
TIPRL	-0.236795	0.0519233
NTMT1	-0.218193	0.0519707
POSTN	-0.383182	0.0519725
HMGCS1	-0.301339	0.0524239
POLG2	0.397662	0.0524355
PAFAH1B1	-0.131568	0.0525255
VPS45	0.212845	0.0527071
COX5B	0.222013	0.0527401
IRF2BP2	0.397847	0.0527511
MGAT2	-0.192836	0.0527566
DBI	0.218135	0.0528214
WFS1	0.272689	0.0530867
LGALS9B	0.243578	0.0531212
WIPF1	0.41044	0.0534269
CMA1	-0.433311	0.0534269
SUGT1	0.162022	0.053461
CASP7	-0.226492	0.053461
IDH3G	0.255922	0.0534821
SGCD	0.357563	0.0536101
LDAH	0.195053	0.0536101
GRPEL1	-0.175612	0.0536267
DIP2A	-0.217927	0.0536421
RPL19	-0.313789	0.0536421
ESYT1	-0.158799	0.0536621
ADGB	-0.237126	0.0536621
MX2	-0.367357	0.0536621
WDR36	-0.168921	0.0545041
TTLL12	-0.190661	0.0545041
PRKD2	-0.251699	0.0545041
AAR2	-0.524456	0.0545041
METTL1	0.286781	0.0551506
CARS1	-0.205647	0.0551506
NOP10	0.439226	0.055329
CEBPZ	0.182529	0.0554803
RFTN1	0.235968	0.0555309
HLA-DRB1	-0.270959	0.0556721
FAHD2A	0.228455	0.055699
NEK9	-0.235213	0.0558305
CHD8	0.219605	0.0558821
SMC2	0.286521	0.0559187
DNMT1	-0.201818	0.0559187
MOGS	0.204165	0.0562347
PPP1R13L	0.246418	0.0562386
ABCC4	0.28295	0.0563048
ALDH1L2	0.279198	0.0563547
IGLL5	-0.46248	0.0564303
UQCRB	0.316542	0.056489
RRBP1	0.184987	0.056489
STX3	-0.214627	0.056489
XPNPEP3	-0.350814	0.0567616
YY1	-0.198325	0.0568701
GSDMB	-0.47416	0.0570629
RBM14	0.24206	0.05723
ASS1	-0.330055	0.0573416
SPAG7	-0.226712	0.0575624
SEL1L	-0.216596	0.0577028
ASL	0.233894	0.0577472
SRPK1	0.228663	0.0577472
PTBP1	0.137661	0.0577472
UBA1	0.128899	0.057791
HEXA	-0.237826	0.0578255
GALC	0.312814	0.0578322
BABAM2	0.167201	0.057878
DES	0.528031	0.0582488
GOLGA7	-0.243818	0.0582488
SLC25A22	-0.244449	0.0582488
PAAF1	0.25504	0.0583924
DNM3	-0.337698	0.0585674
UMPS	-0.255634	0.0588401
AGR3	-0.501289	0.0588401
HLA-A	0.29713	0.0588629
FMOD	-0.34524	0.0588629
MRPS36	0.279182	0.0588799
TFB1M	0.261001	0.0588799
GNPDA1	0.184638	0.0588799
FAM114A1	-0.231421	0.0588799
ATP11B	-0.236018	0.0588799
ZWILCH	-0.230542	0.058933
GPR89A	0.289142	0.0590778
CAD	0.154876	0.059368
LMOD1	0.453705	0.0594699
UPF1	0.119199	0.0595788
PUF60	0.143988	0.0598298
PDPR	0.256982	0.0598868
SOD2	-0.203567	0.0598966
PEBP1	0.161586	0.0599738
IGHG2	-0.222451	0.0599738
PRKAB1	0.303567	0.0602284
CNPY3	-0.366624	0.0603315
NDUFS6	0.526072	0.0604837
EEF1D	0.129897	0.0605579
DTX3L	-0.146868	0.0607285
CMC1	0.355612	0.0613758
PTER	0.331023	0.0613976
TNPO2	-0.145547	0.0613976
MYO1B	-0.131842	0.0614315
TRIO	0.217633	0.0615118
EML4	0.168409	0.0616594
MRPL9	0.304449	0.0616664
HSPA12A	0.298564	0.0619114
KPNA4	0.235147	0.0623041
CTBP2	-0.193752	0.0626864
ERCC2	0.576273	0.0628806
CSNK2A1	-0.157638	0.0629791
CD44	-0.218342	0.0629791
AFDN	0.154625	0.0637632
COPB2	-0.12792	0.0637632
PLCG2	-0.220689	0.0637632
NUDCD2	-0.256603	0.0637632
IFI30	-0.364399	0.0640828
GOLPH3L	-0.278549	0.0643682
BPNT1	0.219578	0.0644104
HTRA2	0.550339	0.0645045
MMAB	0.342684	0.0646049
INTS1	0.174779	0.0646049
RBM39	0.159862	0.0646049
GMPPA	-0.21262	0.0646049
USP15	-0.141552	0.0648199
RHOC	0.275837	0.0649637
ADH1C	0.438323	0.0653711
COX7A2	0.22586	0.0653711
ARF4	-0.199123	0.0653711
SIGIRR	-0.224628	0.0653711
PLIN2	-0.183329	0.0655368
MTX2	0.227774	0.0661717
NDUFV2	0.177774	0.066453
ECPAS	-0.143427	0.0667383
MPP1	0.247792	0.0671085
CD74	-0.334274	0.0671085
PSMA4	-0.130784	0.0672003
CASP10	-0.226604	0.0672834
UBE2L6	-0.272806	0.0674568
RPS3	0.112764	0.067469
ZC3H13	0.66638	0.0678526
ANKRD22	-0.245549	0.0680715
C1QBP	-0.246917	0.0681096
NIFK	-0.227534	0.0683339
AKR1C1	0.3701	0.0685663
CAMKK2	0.322638	0.0685663
SERPINB8	-0.233938	0.0685663
MAPK9	-0.234653	0.0685663
MAP2K1	-0.278401	0.0687927
IGFALS	-0.634078	0.069196
PODXL	-0.292441	0.069216
RCC1	-0.196221	0.069425
PGLYRP2	-0.392746	0.0696996
FDX1	0.239471	0.070353
JAKMIP1	0.299282	0.0704635
C20orf27	-0.189051	0.0704635
PPP5C	-0.173514	0.0706768
AKR7A3	-0.317601	0.0710449
PCID2	-0.311999	0.0711409
TWNK	-0.35933	0.0712256
PARK7	0.135807	0.0712526
PWP1	-0.168842	0.0712526
NASP	-0.172344	0.0712526
WDHD1	-0.236252	0.0712577
AARSD1	-0.223054	0.0712743
HLA-H	0.320199	0.071693
BAK1	-0.283937	0.0717009
GHDC	0.189165	0.0721143
PLBD2	-0.233506	0.0723696
UCK2	-0.20282	0.0724453
GAPVD1	-0.150635	0.0725397
EPN1	0.216229	0.0725631
COX20	0.198796	0.0725631
ACSL1	-0.283574	0.073
APOA4	-0.300087	0.0730803
MIA2	-0.181634	0.0737214
PAPSS2	-0.212876	0.0737214
ZNF428	-0.242199	0.0737214
COPS6	-0.172214	0.0738624
CPOX	-0.238747	0.073983
ZNF687	0.254931	0.0740383
GATC	0.227097	0.0756045
SNX8	-0.237029	0.0756045
IVD	0.234826	0.0758351
MRPL1	0.170147	0.0758351
GCLM	-0.199348	0.0758351
RAP2C	-0.153349	0.0758842
MRPL44	0.353329	0.0758962
MRPS10	0.355405	0.0759208
PPP4C	-0.163466	0.0760393
MRPL49	0.301581	0.0760823
HK1	0.147907	0.076304
ANPEP	-0.307305	0.0763992
ARF6	-0.140601	0.0764074
INTS7	0.210249	0.0764784
POP1	0.178165	0.0766944
ASAP1	-0.186651	0.077041
AP2A1	0.117793	0.0779244
POLD2	-0.295329	0.0780292
NPC1	-0.216546	0.0783672
USE1	0.398304	0.0785447
ABHD14B	0.170946	0.0785447
KNTC1	-0.190128	0.0785447
ELMO3	-0.253306	0.0785447
MEAF6	0.312371	0.0787237
DDX39B	0.103143	0.0793649
DLG3	-0.335064	0.0794046
AP4S1	-0.171331	0.0794657
MMS19	-0.229339	0.0796736
GNA11	-0.1189	0.0799989
NUP50	-0.225367	0.0801315
KLC1	-0.166691	0.0803997
UBE2O	-0.183091	0.0806827
DEPTOR	-0.336319	0.0811053
MFSD6	0.254529	0.0811319
DEK	0.142689	0.0814575
ARMCX1	0.391621	0.0815293
EIF4H	0.154383	0.0816197
PSMC6	-0.101927	0.0816569
FASTKD5	-0.223018	0.0816569
LGALS8	-0.257495	0.0816569
ARFIP1	0.270332	0.0817988
MAP1B	-0.402998	0.0817988
MAP3K20	0.222434	0.0820751
CEP170B	-0.222652	0.0820751
MMTAG2	-0.272352	0.0820751
ACAA1	0.233109	0.0826701
POLR2E	0.279155	0.0828158
LAS1L	-0.159696	0.0829018
NCKIPSD	-0.179785	0.0835731
BIN2	-0.400062	0.0835731
LAMA3	-0.251794	0.0836598
TACO1	0.365757	0.0839051
CA2	-0.27166	0.0839051
LARS1	0.12165	0.0841382
NDUFB1	0.234674	0.0842538
NUCB1	0.13201	0.084255
DNAJA1	-0.195432	0.0843877
UBA6	-0.187163	0.0845115
RBM25	-0.153836	0.0846057
ARMC1	0.312592	0.0846318
RALGAPA2	0.264103	0.0850639
CLUH	-0.190952	0.0851794
KARS1	0.117042	0.0852151
MTHFD1L	0.187722	0.0853896
TPRKB	0.251285	0.0855456
HNRNPR	0.111603	0.0855587
SMARCC2	0.170002	0.0858908
H3-3B	0.630879	0.0859287
BPTF	-0.323119	0.0859898
ABHD12	0.38624	0.086412
UBLCP1	0.229377	0.086412
AFAP1	0.201932	0.0864419
SPCS2	-0.214345	0.0864419
RBM10	0.188612	0.0865329
NCEH1	-0.213161	0.0866243
PSMD6	-0.128219	0.0866996
WDR46	0.234445	0.0868483
ALDOA	-0.17	0.0868483
PTPRG	-0.237057	0.087238
NCBP3	-0.191706	0.0873852
RPS11	-0.146534	0.0875106
HKDC1	0.285417	0.0875562
AKAP1	0.261163	0.087963
TOMM40	0.118426	0.087963
TEX10	-0.194102	0.0881904
TXNL1	-0.142573	0.0886171
SMC3	0.135621	0.0890635
GTF2F1	0.191645	0.089105
HPRT1	-0.171181	0.089105
CARM1	0.14372	0.0891712
XYLT2	0.223177	0.0894228
MSN	-0.167966	0.089506
URB2	0.166823	0.0895148
ATP5PF	-0.187053	0.08967
RPL26	-0.230946	0.0897177
UBE2V2	0.321373	0.090212
RBM33	0.227318	0.090212
AGO2	0.218472	0.090212
DYNC1LI2	0.210797	0.090212
TPM4	0.205562	0.090212
RECQL	0.137271	0.0906753
VSNL1	-0.359793	0.0907323
POLR1B	0.151396	0.0907664
FASTKD2	-0.344681	0.0910369
OCIAD2	-0.198654	0.0911675
EGFR	0.258217	0.0913578
PRDX4	0.132102	0.091439
MZB1	0.401851	0.0916168
LEMD3	0.150364	0.0919821
SPRYD7	0.234041	0.0925763
NAA15	-0.101636	0.0925763
SF3B1	-0.110481	0.0925763
GLA	-0.241939	0.0925763
FTL	-0.285668	0.0925763
FBP1	0.193507	0.0926734
HTT	-0.156204	0.0926837
ATAD1	0.161175	0.092813
CDK5RAP1	0.394058	0.0930072
ARFGAP2	0.159064	0.0932083
SDHC	0.363907	0.0933683
FNBP1L	0.246662	0.0933683
VWA8	0.231142	0.0933683
TMEM126A	0.275935	0.0935352
RNASEH2C	0.469714	0.0942699
RPL9P9	-0.116563	0.0942699
RPL27A	-0.148049	0.0942699
PLTP	0.289313	0.094789
GNAS	0.183785	0.0949821
PIN4	0.256088	0.0951981
DAZAP1	0.233206	0.0951981
COPA	-0.111212	0.0951981
SUZ12	-0.162181	0.0951981
PRUNE2	-0.37188	0.0951981
THYN1	0.25163	0.0952066
PIP4K2C	0.239395	0.0952066
TMEM33	-0.237898	0.0953826
MRPS6	0.2636	0.0954695
HNRNPUL2	0.162993	0.0954764
ATP2A3	-0.233307	0.0954764
VDAC3	0.150919	0.0954812
SIRT2	-0.256494	0.0958136
THOC7	-0.233679	0.0958438
MBD2	-0.210776	0.0958486
UCHL3	0.167013	0.0961785
COPB1	-0.114175	0.096472
NCAPD3	-0.356703	0.0980191
PPIA	0.147836	0.0982832
MYO5B	-0.170198	0.0982832
GLTP	-0.217441	0.0982832
IGF2R	-0.216641	0.0983049
MXRA5	-0.250628	0.0986738
NUDT16L1	0.240371	0.0987612
ABCE1	0.137163	0.0987612
LSP1	-0.519997	0.0989233
GLO1	0.130623	0.0989881
DDX24	-0.211017	0.0992513
SLC44A2	-0.371672	0.0994268
APPL2	0.285938	0.0995936
ARFGEF3	-0.233083	0.099638
GSK3A	-0.157681	0.0996796
CTSH	0.239429	0.0997576
OS9	-0.297731	0.0997576
ARHGEF17	0.56321	0.0998154
NPC2	-0.30157	0.0999074
NDUFB10	-0.205025	0.100038
ACY1	0.228849	0.100113
BGN	-0.254295	0.100479
IRF3	0.393869	0.100905
TMOD3	-0.352305	0.100905
RAVER1	0.220354	0.101041
COX6A1	0.416392	0.101527
ACACA	0.172456	0.10177
ABRAXAS2	0.135876	0.101916
PRDX6	0.148755	0.102866
NSUN5	-0.197415	0.102866
BTF3	-0.216709	0.102866
DNPH1	0.295509	0.103254
HNRNPDL	0.11208	0.103254
EXOSC8	0.398144	0.103781
CST3	0.231627	0.103781
ANK3	0.167812	0.103834
PRDX3	0.138709	0.104003
SMAD1	0.333972	0.104416
MARS2	0.231975	0.104416
SETD3	-0.205501	0.104416
ARMCX3	0.289587	0.104953
NFKB1	-0.161869	0.104953
USP47	-0.130801	0.105589
NDUFA8	0.227851	0.105731
RPL32	-0.102993	0.105731
ZZEF1	-0.205993	0.105731
MRPL58	0.302167	0.105732
XRCC5	0.107806	0.105732
CORO1B	0.255211	0.106183
INPP5D	0.228406	0.106789
FCHO2	-0.241275	0.106789
COX4I1	0.145254	0.10691
TBL3	-0.117407	0.10691
EP400	-0.280994	0.10691
HSPE1	0.236872	0.106995
GLB1	0.121761	0.106995
VAMP2	-0.221846	0.107604
PRPF8	-0.160837	0.107641
NIBAN2	-0.140308	0.10836
MATN2	0.287001	0.108637
PRPF38A	-0.154342	0.108637
DDI2	-0.19408	0.108641
PKLR	-0.22639	0.108896
DLG1	0.242439	0.109295
ABR	-0.178921	0.109923
MEPCE	0.274962	0.110162
CPT2	0.197841	0.110698
PPIF	0.257574	0.110803
CXorf38	-0.192422	0.110803
PNPLA6	0.146683	0.111046
MRM3	0.263449	0.111927
EXOSC1	0.250507	0.111927
ODR4	0.217731	0.113186
RELA	0.198172	0.113186
CYP20A1	0.15446	0.113186
GOLGA4	-0.260872	0.113186
STX8	-0.176406	0.113724
ISCA2	0.23777	0.114
ATP6V0A1	-0.166771	0.114055
DPYSL2	-0.165291	0.11421
ZNF622	-0.248377	0.114549
SWAP70	-0.267144	0.114632
LTBP2	0.431249	0.114851
SYNGR2	-0.187506	0.114884
NAXD	0.257706	0.115136
PDIA4	-0.137227	0.115136
SVIL	0.195898	0.115447
TM9SF2	0.174482	0.115819
RABL6	0.220568	0.116175
KIF23	-0.225361	0.116269
UBR1	-0.175281	0.116737
MCU	-0.153674	0.116909
GMPPB	-0.127888	0.117184
DRAP1	-0.229983	0.117774
BAG6	0.108483	0.118044
ADD3	0.169208	0.118966
WDR55	-0.15791	0.118966
CLPX	-0.202752	0.118966
ENPEP	-0.30077	0.118966
NLE1	-0.219266	0.119967
UGP2	0.127264	0.119975
TAP2	-0.195512	0.120124
ORC4	0.237089	0.120268
GBE1	-0.25084	0.120426
RBM47	-0.167638	0.120469
OGN	0.481055	0.120474
TAGLN2	0.135409	0.120736
OGT	-0.316312	0.120768
RXRB	0.303983	0.120938
SH3BP1	0.16615	0.121046
[truncated: 2,947 more rows]
