# Supplementary material for: Proteomics of colorectal tumors identifies the role of CAVIN1 in tumor formation and progression
Source: Research Square preprint supplement (doi:10.21203/rs.3.rs-3817695/v1), 2024-01-11
Supplement: Supplementary file 5 [file dc2fabd3dc44c2d8046cfc31.xlsx]

## Sheet: rokai_input
Protein	Position	Quantification
A0FGR8	S738	0.290789
A0JLT2	S226	0.07484
A6NEL2	S271	0.0751589
C9JI98	S154	-0.23232
O00160	S1023	0.217355
O00429	S616	-0.388842
O00512	S278	0.208703
O00512	T315	0.0739161
O00515	S177	0.278302
O00559	S36	-0.111148
O14493	S206	-0.361968
O14497	S363	-0.681238
O14639	S452	0.236418
O14639	Y373	0.0721828
O14681	S320	-0.817533
O14681	S330	-0.331131
O14683	S14	0.454757
O14686	S4738	-0.233752
O14828	S76	-0.244108
O14950	S20	-0.542513
O14974	S445	-0.243976
O15027	S1069	0.139698
O15027	S1964	-0.412041
O15027	S2083	-1.20237
O15042	S67	0.0794592
O15047	S1103	0.334923
O15047	S470	0.074726
O15055	S977	-0.231467
O15127	S319	0.0404492
O15417	T2146	0.0722477
O15427	S436	-0.0389253
O15530	S241	0.0906004
O15551	S209	-0.692269
O43294	S137	0.448923
O43294	S143	-0.659345
O43294	S186	0.704479
O43294	S403	0.629408
O43294	T33	0.0880335
O43318	S439	0.0306352
O43432	S495	-0.0827679
O43491	S87	-0.467387
O43524	S413	-0.21232
O43719	S498	-0.00456971
O43847	S94	-0.149499
O60293	S662	0.0300649
O60343	S341	-1.16348
O60343	S588	-0.734132
O60343	S666	-0.20949
O60486	S978	-0.113724
O60499	S134	-0.373789
O60716	S252	-0.77984
O60716	S268	-0.282328
O60716	S349	0.031243
O60716	S352	0.00215875
O60749	S119	-0.511389
O60762	S9	-0.245253
O60841	S214	-0.373648
O60885	S1045	0.0360989
O60885	S1083	0.154092
O75069	S438	0.00056982
O75122	S370	-0.361252
O75151	S899	-0.365103
O75367	T129	-0.0841796
O75369	S2478	-0.0651304
O75396	S137	-0.520308
O75396	S168	0.0734815
O75427	S500	-0.658316
O75533	T278	-0.142076
O75592	S2789	0.210298
O75683	S138	-0.290575
O75764	S115	0.199457
O75909	S340	-0.0855
O76021	S427	-0.184302
O94826	S91	-0.155391
O94876	S382	0.137284
O94915	S1978	0.146036
O94979	S1163	0.694644
O94979	S799	0.389297
O95071	S1549	-0.0426568
O95197	S30	0.699306
O95251	S57	-0.585831
O95359	S2321	0.799002
O95391	S215	0.0504141
O95400	S195	-0.158098
O95425	S245	-0.226309
O95453	S619	-0.549127
O95466	S1031	0.523639
O95466	S624	-0.325133
O95817	S173	-0.259392
O95819	S900	-0.184709
O95997	S165	-0.462853
O96013	S104	0.496962
P00558	S203	0.203287
P01833	S673	0.427998
P02452	S176	0.277128
P02452	S720	0.488883
P02461	T614	0.460423
P02461	T646	-0.206962
P02461	T721	0.112888
P02545	S22	0.106865
P02545	S390	0.250632
P02545	S392	-0.211132
P02545	S404	0.752242
P02671	S215	-0.118744
P02730	S356	0.0893463
P02765	S138	-1.05356
P02765	S330	0.215655
P04049	S259	-0.0878734
P04049	S289	0.174723
P04637	S315	-0.563976
P04792	S82	-0.160437
P05023	S653	0.305934
P05023	T366	-0.272487
P05412	S63	0.130234
P05412	T239	0.769807
P05783	S18	-0.279753
P05783	S34	-0.318195
P05783	T65	-0.295674
P06239	Y394	0.159149
P06400	T356	-0.239883
P06400	T373	0.540211
P06454	S2	0.0488884
P07900	S231	0.514332
P08575	S975	0.0572788
P08621	S226	-0.0746458
P08670	S420	0.585089
P08670	S430	0.0273137
P08670	S56	-0.879273
P08727	S35	0.602667
P09651	S6	0.162766
P0C1Z6	S180	0.669321
P10412	S2	-0.103606
P10412	T18	-0.147568
P10412	T4	0.294094
P10644	S83	-0.24691
P11388	S1393	-0.626927
P12236	S42	-0.209324
P12931	S17	-0.0994906
P12931	Y419	0.44333
P13498	T147	-0.425376
P13569	S660	-0.677154
P13612	S1021	0.110369
P13639	T57	0.1582
P14317	S275	-0.155904
P14923	S182	0.502687
P15056	T458	0.444642
P15408	S200	-0.106203
P15924	S22	-0.284687
P15924	S2209	-0.478084
P15924	S2825	0.105535
P16070	S706	-0.37843
P16144	S1457	-0.224527
P16144	S1474	-0.108393
P16144	T1530	0.121073
P16150	T341	-0.124505
P16401	S18	0.0968503
P16401	S2	0.305385
P16401	T11	0.121518
P16401	T4	-0.0621985
P16402	S37	0.10636
P16402	T18	-0.286896
P16403	S2	0.222606
P16403	S36	0.339611
P16403	T31	0.402356
P16403	T4	0.222606
P16949	S16	-0.357623
P16949	S38	-1.07405
P17029	S208	0.508246
P17096	S36	0.433
P17096	S44	-1.22256
P17612	Y205	-0.923871
P18206	S346	0.39824
P18206	S721	-0.524927
P18583	S1697	-0.407579
P18583	S1769	0.148995
P18887	S241	0.156059
P19338	S563	-0.358559
P19338	S67	-0.225648
P19338	T121	-1.83927
P19634	S599	-0.167137
P19634	S602	0.584304
P19634	S693	0.668619
P20020	S1139	-0.147375
P21127	S65	0.486786
P21333	S1084	-0.538822
P21333	S1459	-0.924975
P21333	S2152	0.186325
P21730	S327	-0.0261495
P21796	S104	0.664268
P22314	S4	-0.472812
P22670	S159	-0.149206
P23193	S100	-0.302956
P23443	T444	-0.180239
P23528	S3	-0.954922
P23528	S8	-1.10362
P23588	S422	-0.580027
P23588	S459	0.433817
P24821	S72	0.0726258
P25440	S298	-0.0996625
P26358	S143	-0.54247
P26368	S79	0.116042
P27708	S1859	-0.405616
P27816	S1073	-0.314905
P27816	S358	-0.955123
P27816	S928	-0.741273
P27824	S583	0.0119723
P28290	S739	0.274285
P29474	S1177	0.317801
P29590	S403	0.293018
P29590	S505	0.398602
P29590	S518	-0.157662
P29692	S133	-0.449311
P29966	S101	0.384267
P29966	S170	-0.571951
P29966	T150	-0.337951
P31943	S104	-0.608615
P32519	S187	0.0372021
P33176	S933	-0.486943
P33241	S252	-0.23199
P35222	S191	0.147753
P35222	S552	0.174569
P35222	S675	0.0781969
P35251	S156	-0.481127
P35269	T389	-0.22008
P35568	S636	0.00404977
P35579	S1943	0.0902958
P35606	S859	-0.877046
P35606	T861	0.369252
P35611	S358	0.102826
P35658	S678	-0.352271
P35659	T13	0.00947954
P36507	T394	-0.0852498
P36871	S117	-0.344687
P37802	S163	0.226733
P40763	Y705	0.145379
P41208	S20	0.289235
P41227	S186	-0.45559
P41235	S436	0.0585022
P42166	T160	-0.067383
P42166	T74	-1.15329
P42224	S727	0.231047
P42345	S1261	0.0943791
P42345	S2448	0.0926768
P42345	T1162	0.220866
P42566	S814	-0.0191721
P42568	S483	-0.108788
P42679	S94	0.32462
P42679	T93	0.327873
P45985	S257	0.227747
P45985	T261	0.397268
P46013	S357	-0.167488
P46019	S729	-0.261603
P46379	S113	-0.182068
P46821	S1265	0.459979
P46940	S330	0.15644
P47914	S142	-0.332638
P48634	S1219	-0.184085
P48764	S555	0.54648
P49006	S104	-0.832811
P49006	S22	-0.589234
P49023	S322	-0.160314
P49590	S67	0.261664
P49736	S13	-0.700872
P49736	S27	-1.05765
P49756	S677	-0.235536
P49768	S43	-1.05301
P49792	S1509	-0.358149
P49792	S2804	0.0951416
P49815	S1254	0.127015
P49815	S1411	-0.180049
P49815	S939	0.0795581
P49815	T1462	-0.33839
P49840	S21	-0.26467
P49841	S9	-0.151083
P50402	S49	0.0420851
P50613	T170	0.0639138
P50750	S347	-0.185822
P50851	S10	0.14542
P51003	T544	0.0985024
P51149	S72	-0.47976
P51531	S1377	0.0383699
P51608	S80	0.347945
P51812	S369	0.134806
P51825	S588	-0.358945
P51858	S165	-0.266663
P51991	S358	0.170085
P52943	S115	0.590544
P53396	S455	-0.053518
P53396	S481	-0.374348
P53602	S96	0.523369
P53985	S461	-0.303995
P54259	S34	0.417398
P54727	S160	0.33105
P55011	S23	-0.468304
P55011	S77	-0.0938081
P55196	S1083	0.0452705
P55196	S1182	0.236229
P55196	S1448	-0.301543
P55198	S258	-0.463375
P55265	T601	0.372998
P56192	S825	-0.232635
P56524	S632	-0.0382261
P57081	S391	-0.132278
P58107	S2718	0.421689
P60174	S21	0.181725
P60468	S17	-0.132028
P62136	T320	-0.156089
P62328	S2	0.211106
P62995	T201	0.034744
P63165	S2	-0.330466
P67809	S174	-0.266684
P78344	T508	-0.637846
P78527	S893	0.148266
P78527	T2075	-0.38679
P84103	S5	0.23713
P85037	S213	0.227859
P85037	S416	-0.587573
P85037	S420	-0.240569
P85037	S445	-0.281252
P98082	S401	-0.67437
P98175	S723	-0.242332
Q00610	T394	0.00941183
Q00613	S363	-0.720625
Q00839	S2	0.0146554
Q00839	S3	0.0146554
Q00839	S4	0.0533687
Q01082	S2102	0.049957
Q01082	S2138	0.0522117
Q01082	S2165	-0.181136
Q01082	S2341	-1.52546
Q01105	S7	0.227429
Q01130	S2	-0.775661
Q01130	S26	0.161601
Q01167	S381	0.109376
Q01167	S398	-0.172944
Q01518	S308	-0.747834
Q01581	S495	-0.355696
Q01813	S386	-0.336464
Q02040	S537	0.0335601
Q02078	S408	0.179749
Q03112	S1039	0.326605
Q03164	S2098	0.0555086
Q03252	S405	-0.164106
Q04637	S1209	-0.337886
Q04637	S1231	-0.207579
Q05397	Y576	0.00664651
Q05519	S209	-0.467252
Q05682	S202	1.92626
Q05682	S759	0.0245132
Q05707	S1543	0.384132
Q05707	S1549	0.436749
Q06210	S261	-0.0743815
Q07065	S26	0.443396
Q07955	S199	-1.56054
Q07960	S51	0.188242
Q08170	S431	0.00859857
Q09472	S2328	-0.0877011
Q09666	S210	0.417854
Q09666	S5110	-0.162407
Q09666	S5448	-0.196967
Q09666	S93	0.332908
Q09666	T5824	-0.957013
Q0ZGT2	S365	-0.0823377
Q12830	S216	-0.0738713
Q12830	Y1882	-0.0309225
Q12888	S1317	-0.252674
Q12888	T1056	-0.177438
Q12906	S382	-0.849147
Q12929	T317	-0.15922
Q12982	S114	0.092987
Q13085	S80	-0.116889
Q13131	S496	0.808332
Q13177	S141	-0.0724101
Q13200	S16	0.0763245
Q13242	S211	-0.0581276
Q13247	S303	-0.0243923
Q13247	S314	0.0208176
Q13247	S316	0.0208176
Q13263	S473	0.556451
Q13263	T541	0.677663
Q13283	S232	-0.295396
Q13362	S497	-0.0367755
Q13425	S110	-0.00807457
Q13425	S95	-0.146876
Q13428	S1111	0.0677017
Q13428	S1228	-0.227157
Q13428	S1257	-0.528158
Q13428	S1350	-0.0143033
Q13428	S1378	-0.142136
Q13428	S156	-0.533707
Q13428	S233	0.0571842
Q13428	S381	-0.379726
Q13428	S503	-0.645736
Q13428	S583	-0.437906
Q13428	S906	-0.445374
Q13443	S758	-0.197373
Q13459	S1290	-0.298728
Q13469	S236	-0.331489
Q13480	Y627	0.0246647
Q13501	T269	0.0663712
Q13523	S277	0.125017
Q13523	S292	0.0583169
Q13523	S294	0.324256
Q13573	S224	0.259938
Q13586	S257	-0.014307
Q13595	S260	0.548982
Q13595	S262	0.447314
Q13595	T202	-0.114224
Q13613	S653	-0.752754
Q13627	Y321	0.0929152
Q13769	T328	0.0851871
Q13813	S1029	0.367757
Q13813	S1217	0.151868
Q13884	S389	0.114481
Q14004	T871	-0.293018
Q14126	S680	0.276339
Q14126	T922	-0.120054
Q14157	S454	0.0475522
Q14244	S242	-0.476412
Q14244	S335	-0.732585
Q14244	S365	0.685522
Q14247	S418	-0.522592
Q14247	T401	0.0710022
Q14289	S375	-0.0621548
Q14315	S2233	-0.0943741
Q14498	S117	-0.692248
Q14498	S136	0.0698536
Q14498	S97	-0.150121
Q14573	S1832	-0.209329
Q14573	S1843	-0.114044
Q14573	S2670	0.18489
Q14573	S934	-0.428047
Q14643	S1598	0.0275756
Q14669	S310	0.079844
Q14669	S312	-0.200067
Q14689	T279	-0.247722
Q14699	S220	0.213497
Q14739	S99	-0.222156
Q14764	S445	-0.0154413
Q14802	T76	0.644931
Q14839	S1535	-0.528186
Q14847	S146	0.327856
Q14978	S538	0.145861
Q14978	S698	0.175699
Q14980	S1757	-0.253978
Q15052	S488	-0.0410951
Q15059	S263	0.0845208
Q15061	S77	-0.0199483
Q15149	S125	-0.189044
Q15149	S1435	0.405097
Q15149	S4386	-0.785366
Q15149	S4396	-0.224164
Q15149	S4613	-0.616403
Q15149	S4642	0.0919185
Q15149	T4030	-0.778991
Q15233	T450	-0.708023
Q15287	S251	0.134592
Q15418	S363	-0.554967
Q15418	T359	-0.0192854
Q15477	S256	-0.301669
Q15648	S1156	-0.215801
Q15648	S1223	-0.504481
Q15648	T1051	-0.295352
Q15811	S904	0.0220068
Q15836	S11	-0.248801
Q15942	S281	-1.38738
Q15942	S344	-0.101107
Q16629	S192	0.558586
Q16643	S142	0.292977
Q16666	S153	0.327969
Q16875	S461	-1.02971
Q1HG44	S296	1.69639
Q1L6U9	S26	-0.0675725
Q1L6U9	S36	-0.299705
Q27J81	S359	0.241289
Q29RF7	S1305	-0.192109
Q32P44	S176	-0.387184
Q32P51	S4	0.358947
Q32P51	S6	0.331491
Q4G0F5	S304	-0.160799
Q4G0J3	S298	-0.562944
Q4KMP7	S678	-0.187608
Q4KMP7	S687	-0.586681
Q4KMP7	T148	-0.269243
Q4L180	S791	0.412607
Q53ET0	S613	0.147556
Q53EU6	S68	-0.000563399
Q53GA4	S141	0.751517
Q53RY4	S5	0.231433
Q5JSH3	S262	-0.429564
Q5SNT2	S454	-0.443711
Q5SSJ5	T51	0.0185561
Q5T0N5	S295	-0.454279
Q5T1M5	S956	-0.0249731
Q5T200	S198	0.0575908
Q5T200	S207	0.0842708
Q5T200	S242	1.04891
Q5T200	S643	0.602052
Q5T200	S77	0.404041
Q5T200	S877	0.0122534
Q5T200	S993	-0.13021
Q5T200	T1033	0.069668
Q5T5C0	S759	-0.431685
Q5T8P6	S127	-0.0662592
Q5UIP0	S782	-0.520231
Q5VSL9	S335	-0.0157202
Q5VT52	T723	-0.217799
Q5VTL8	S527	0.1018
Q5VTL8	S529	-0.183274
Q5VUA4	S2101	-0.364236
Q5VUA4	S40	1.04084
Q5VWG9	S755	-0.0933311
Q5VWN6	S444	0.40927
Q5VWQ8	S978	0.275018
Q5VZ89	S1325	-0.732642
Q5VZ89	S1346	-0.336642
Q5VZ89	S1623	0.0208384
Q5VZ89	S989	-0.242669
Q5VZK9	S968	0.0510186
Q63ZY3	S375	0.00444654
Q66K14	S411	-0.227993
Q66K74	S759	0.144868
Q66PJ3	S55	0.163555
Q68CZ2	S660	0.251112
Q68CZ2	S776	-0.0462391
Q68EM7	S575	-0.128579
Q68EM7	S625	-0.755012
Q68EM7	T682	0.625192
Q6KC79	S2658	-0.245443
Q6KC79	T713	0.103047
Q6KC79	T757	0.218226
Q6NUQ4	T97	0.0380296
Q6NWY9	S832	0.523643
Q6NZI2	S167	0.775148
Q6P0Q8	S74	-0.252417
Q6PCE3	S175	-0.462217
Q6PJT7	S515	-0.0359226
Q6PKG0	S521	0.507578
Q6PRD1	Y145	0.0561013
Q6UX71	S506	0.132963
Q6UXY1	S231	-0.224033
Q6VMQ6	S559	-0.100889
Q6ZNJ1	Y1292	0.0609262
Q6ZRS2	S3016	-0.79587
Q6ZRV2	S523	-0.0494813
Q6ZRV2	S870	0.325611
Q6ZRV2	S881	0.193911
Q6ZRV2	S914	-0.451037
Q6ZWT7	T474	-0.159958
Q7KZF4	S426	-0.658919
Q7L4I2	S222	0.686431
Q7L4I2	S32	-0.105581
Q7L4I2	S4	-0.0765992
Q7Z3C6	Y471	-0.292079
Q7Z3K3	S425	0.10032
Q7Z3U7	T1187	0.0711932
Q7Z404	S109	0.0256722
Q7Z422	S39	-0.157457
Q7Z460	S600	-0.190695
Q7Z4V5	S652	0.114465
Q7Z5L9	S175	-0.228492
Q7Z5L9	S240	-0.367448
Q7Z5L9	S360	0.0457554
Q7Z5L9	S460	-0.044774
Q7Z5L9	T404	0.285748
Q7Z6E9	S1179	-0.0876362
Q7Z6E9	S1277	-0.0517959
Q7Z6Z7	S1395	-0.105922
Q86T03	S162	-1.20242
Q86TB9	S179	-0.75904
Q86TI0	S237	-0.445285
Q86U06	S149	-0.124017
Q86U90	S37	-0.012993
Q86UE4	S298	-0.163736
Q86UE4	S426	-0.601492
Q86VE9	Y345	0.456602
Q86VF7	Y652	0.32005
Q86VM9	S487	0.210012
Q86VM9	S534	-0.537598
Q86VM9	S868	0.169343
Q86VM9	T796	-0.71541
Q86VP1	T520	0.384115
Q86WB0	S321	0.077821
Q86WB0	S395	0.0124154
Q86X29	S493	-0.349977
Q86X29	S643	-0.175087
Q86X29	Y323	-0.686556
Q86YS7	S852	-0.640896
Q8IU81	S384	0.375892
Q8IU81	S436	-0.109428
Q8IU81	S453	-0.164092
Q8IV36	S593	1.06499
Q8IVT2	S394	0.00558105
Q8IVT2	S543	-0.392493
Q8IXM2	S96	-0.976024
Q8IXQ4	S105	0.0897316
Q8IY67	S14	-0.140848
Q8IY67	S6	0.216566
Q8IY67	T463	-0.161027
Q8IYB3	S227	0.62791
Q8IYB3	S260	0.130998
Q8IYB3	S389	0.92203
Q8IYB3	S402	0.137659
Q8IYB3	S429	-0.183771
Q8IYB3	S431	-0.110917
Q8IYB3	S560	-0.10153
Q8IYB3	S562	0.0139023
Q8IYB3	S583	0.371559
Q8IYB3	S597	0.109429
Q8IYB3	S616	0.0454289
Q8IYB3	S696	-0.923013
Q8IYB3	S713	0.451991
Q8IYB3	S738	0.0849798
Q8IYB3	S740	0.716621
Q8IYB3	S769	0.446288
Q8IYB3	S775	0.36446
Q8IYB3	T220	0.0792978
Q8IYB3	T406	0.137659
Q8IYB3	T572	-0.081541
Q8IYB3	T574	-0.126521
Q8IYB3	T581	0.410196
Q8IYB3	T614	0.143429
Q8IYP9	S206	-0.476662
Q8IZL8	S481	-0.0828219
Q8IZP0	S183	0.0253764
Q8N108	S377	0.182588
Q8N122	S722	-0.850899
Q8N1F7	S767	-0.104476
Q8N1F8	S761	-0.116653
Q8N201	S1327	0.14241
Q8N2F6	S45	-0.154119
Q8N2M8	S285	-0.0539758
Q8N2M8	S547	0.0600633
Q8N3D4	S310	-0.879375
Q8N4C8	S763	-0.133942
Q8N556	S668	-0.685329
Q8N5F7	S149	0.0913544
Q8N5F7	S9	-0.205411
Q8N5U6	S128	0.22804
Q8N7R7	S344	-0.166877
Q8N8A6	S83	-0.0709278
Q8NBX0	S217	0.342372
Q8ND56	S183	0.16787
Q8ND56	S192	-0.315393
Q8ND56	S216	0.0619336
Q8ND76	S326	-0.101007
Q8ND76	S83	-0.535972
Q8NDT2	T532	-0.382504
Q8NE01	S700	-0.271883
Q8NEF9	S203	-0.155659
Q8NEN9	S538	-0.09493
Q8NEY8	S205	0.143144
Q8NF91	T8360	0.0806776
Q8NFJ5	S345	-0.889531
Q8NHG8	S135	-0.29105
Q8NI27	S1417	-0.351748
Q8TAD8	S35	-0.201596
Q8TAQ2	S302	0.0515452
Q8TAQ2	S304	0.168056
Q8TB61	S427	-0.00677597
Q8TB72	S136	-0.355994
Q8TBZ3	S434	0.0128557
Q8TC07	S675	-0.36343
Q8TD55	T364	-0.36309
Q8TDB6	S9	-0.109453
Q8TDZ2	S617	0.106963
Q8TE67	S205	-0.904241
Q8TE77	S37	-0.588718
Q8TE77	S9	-0.0313023
Q8TEH3	T707	0.088878
Q8TF01	S211	0.0620119
Q8WUA7	S167	-0.471822
Q8WUZ0	S126	-0.0142234
Q8WVM8	S303	-0.0676824
Q8WVQ1	S21	-0.102136
Q8WVV4	S123	-0.224564
Q8WWI1	S1423	-0.356031
Q8WWI1	S1493	-0.555407
Q8WWI1	S1586	0.0493111
Q8WWI1	S1593	-1.21184
Q8WX92	S557	0.0966766
Q8WX93	S893	-0.281606
Q92466	S24	0.00183641
Q92466	S26	-0.231651
Q92538	S1784	-0.604828
Q92597	S330	0.243715
Q92598	S809	-0.273315
Q92609	S522	-0.219429
Q92610	S680	0.12054
Q92667	S444	-0.031766
Q92667	S592	-0.622185
Q92685	S13	0.212295
Q92766	S161	-0.611292
Q92797	S1168	-0.394708
Q92804	S375	0.0642238
Q92835	S243	0.00356372
Q92835	S971	-0.401354
Q92841	S64	-0.281488
Q92859	T472	0.653626
Q92922	S310	-0.045952
Q92994	S553	0.15053
Q96A49	T248	0.107727
Q96AD5	S404	0.0530904
Q96B36	S183	-0.92838
Q96BY6	T1440	-0.458299
Q96CC6	S390	0.131293
Q96CP6	S267	-0.0160914
Q96CW1	T156	0.42716
Q96E09	S76	-0.440401
Q96EB6	S47	0.756446
Q96EP0	S466	0.141705
Q96EV2	S765	-0.0584764
Q96FF7	S91	0.370165
Q96G03	S165	-0.542676
Q96G74	S64	-0.340423
Q96GP6	S687	-0.0678112
Q96IG2	T417	0.516237
Q96JC9	S165	-0.0409433
Q96JM3	S204	0.231004
Q96JM3	S416	-0.0249531
Q96JM3	S542	-0.533247
Q96JP2	S1025	-0.414641
Q96JP5	S83	-0.0672954
Q96LT9	S108	0.0770836
Q96MU7	S308	0.0892852
Q96MU7	S424	0.39195
Q96N67	S1432	-1.05682
Q96PK6	T206	-0.479771
Q96RR4	S511	-0.134641
Q96RU3	S296	-0.124789
Q96S94	S348	0.412652
Q96S94	S369	0.299451
Q96T23	S604	0.0247574
Q96T37	S294	-0.381511
Q96T37	S656	-0.0474994
Q96T37	S700	-0.145853
Q96T37	S741	-0.387591
Q96T37	T568	-0.743025
Q96T58	S1918	-1.20793
Q96T58	S727	-0.000230026
Q96T58	S736	-0.0553724
Q96TA1	S665	-0.239453
Q96TA1	S691	-0.507928
Q96TA1	S692	-0.494321
Q96TC7	S46	0.0143269
Q99460	T273	0.00512288
Q99569	S337	-0.127698
Q99590	S776	-0.815164
Q99590	S796	-0.340538
Q99698	S2105	0.626871
Q99795	S313	0.362069
Q99959	S151	0.40707
Q99959	S251	0.329259
Q99959	S329	0.258828
Q9BQA1	T5	-0.0420408
Q9BQG0	S1166	-0.745999
Q9BQG0	S1267	-0.410432
Q9BR39	S469	0.0182419
Q9BR39	T490	0.376035
Q9BRD0	S271	-0.264544
Q9BTC0	S1456	-0.482492
Q9BTC0	T1733	-0.324667
Q9BTE3	S154	-0.919618
Q9BTU6	S47	-0.621226
Q9BU76	S220	-0.361762
Q9BUH6	S152	0.0717111
Q9BVG9	S16	-0.236279
Q9BVN2	S838	0.0121233
Q9BW71	T84	-0.428753
Q9BWE0	S329	-0.475247
Q9BWE0	T344	-0.148372
Q9BX66	S350	0.107736
Q9BX95	S112	0.323835
Q9BXB4	S189	0.222485
Q9BXP5	S67	0.255857
Q9BXP5	S74	-0.181643
Q9BXP5	T544	0.331103
Q9BY44	S506	-0.0223452
Q9BZZ5	S464	0.113005
Q9C0B5	S380	-0.152614
Q9C0B5	S554	-0.105268
Q9C0C2	S1545	-0.0885468
Q9C0C2	S672	0.126305
Q9C0C9	S896	0.435239
Q9GZP8	S29	0.217644
Q9H019	S103	0.123217
Q9H0B6	S582	-0.450873
Q9H0C8	S13	-0.77607
Q9H0D6	S448	0.251734
Q9H0X4	S21	0.159981
Q9H1B7	S547	-0.79901
Q9H1E3	S181	-0.231021
Q9H1E3	S214	-0.599517
Q9H1E3	S223	0.596249
Q9H2H9	S52	0.365029
Q9H307	S347	-0.280593
Q9H307	S66	0.158803
Q9H330	S332	-0.0992878
Q9H3R2	S482	-0.0494421
Q9H3Z4	S10	-0.139908
Q9H400	S61	-0.393814
Q9H400	T56	-0.416879
Q9H4A4	S7	0.0102643
Q9H4L4	S169	0.0579877
Q9H4L5	S251	-0.232874
Q9H4Z3	S30	-0.0366271
Q9H501	S153	-0.0723104
Q9H501	S198	-0.284573
Q9H6F5	S18	-0.607124
Q9H6F5	S58	-0.215029
Q9H6F5	S91	-0.00973086
Q9H6H4	S152	-0.177637
Q9H792	T1151	0.18111
Q9H7N4	S612	-0.456711
Q9H7N4	S614	-0.585663
Q9H7N4	S874	0.0126025
Q9H7N4	T989	-0.106982
Q9H9C1	S121	-0.0840554
Q9HBL0	S1177	0.0669342
Q9HBL0	Y766	0.376146
Q9HC35	S144	-0.317873
Q9HC35	S146	-0.935973
Q9HCD5	S9	-0.149589
Q9HCG8	S829	0.222066
Q9HCU0	S746	-0.100804
Q9HD20	S899	-0.399701
Q9NPI6	S525	-0.315293
Q9NQC3	S15	0.172632
Q9NQC3	S7	-0.539381
Q9NQC7	S418	0.0543798
Q9NQG5	S134	-0.160124
Q9NQG6	S94	-0.627563
Q9NR19	S267	-0.25976
Q9NR19	S30	0.130447
Q9NR30	S89	0.0309832
Q9NRL2	S1413	-0.697418
Q9NS69	S15	0.16983
Q9NSK0	S460	0.406956
Q9NSK0	S590	0.334423
Q9NSK0	Y593	0.845505
Q9NTI5	S1166	-0.0307934
Q9NTI5	S1358	0.0767165
Q9NVD7	S19	0.630638
Q9NWB6	S77	-0.188659
Q9NWH9	S289	0.258811
Q9NWH9	S553	-0.000240151
Q9NWW5	S31	-0.219765
Q9NY27	S226	0.521525
Q9NYF8	S177	0.0593056
Q9NYF8	S264	-0.200801
Q9NYF8	S268	0.0550991
Q9NYF8	S285	0.399401
Q9NYF8	S290	-0.112028
Q9NYF8	S496	0.516717
Q9NYF8	S512	-0.450816
Q9NYF8	S531	-0.123607
Q9NYF8	S658	-0.00768216
Q9NYF8	Y284	0.888352
Q9NYL2	S727	-0.627996
Q9NYV4	S1083	-0.556895
Q9NYV4	S423	-0.197946
Q9NYV4	T692	-0.34131
Q9NYV4	T893	-0.0536957
Q9NZT2	S378	-0.2943
Q9P1Y6	S1202	0.202456
Q9P1Y6	S1360	-0.0645409
Q9P275	S742	-0.0210646
Q9P2M7	S137	-0.133261
Q9P2M7	S338	0.340388
Q9UBF8	S428	0.00145044
Q9UBM7	S14	0.135692
Q9UBS9	S1226	-0.766245
Q9UDT6	S923	-0.0598645
Q9UDY2	S244	-0.297833
Q9UDY2	S961	0.168075
Q9UDY2	S986	0.32182
Q9UFC0	S212	-0.149504
Q9UG01	S762	0.166133
Q9UG01	Y773	0.0676381
Q9UGP8	T537	-0.581348
Q9UHB6	S132	-0.364046
Q9UHB7	S180	0.11831
Q9UHB7	S487	0.679467
Q9UHR4	S331	-0.106519
Q9UHR4	T257	-0.34445
Q9UIK4	S299	0.0174939
Q9UJU6	S269	-0.501891
Q9UJU6	S283	-0.00594083
Q9UJZ1	T327	-0.381298
Q9UK58	S352	0.037819
Q9UK76	S87	0.218798
Q9UKA4	S1242	-0.0856945
Q9UKJ3	S1035	0.0503842
Q9UKJ3	S1107	-0.135721
Q9UKJ3	S738	-0.151649
Q9UKJ3	S740	-0.0339279
Q9UKK3	S1335	-0.317009
Q9UKM9	S135	-0.182112
Q9UKV3	S1004	-0.134654
Q9UKV3	S400	0.344431
Q9UKV3	S478	-1.08403
Q9UKV3	S710	-0.0333566
Q9UKV3	S729	0.346412
Q9UKV3	S825	-0.93579
Q9UKY1	T668	0.128648
Q9ULE6	S406	-0.102842
Q9ULU4	S490	0.29205
Q9UMD9	S85	0.00423433
Q9UMS6	S604	-0.105787
Q9UN86	T227	-0.199896
Q9UNE7	S19	0.280761
Q9UNZ2	S114	0.560903
Q9UPS6	T381	0.0291416
Q9UPT8	S1269	0.15464
Q9UPT8	S1275	0.186642
Q9UPT8	S1286	0.270915
Q9UPT8	S159	0.0942668
Q9UPU5	S2047	-0.0167749
Q9UQ35	S1012	-0.594054
Q9UQ35	S1083	-0.00582528
Q9UQ35	S1103	0.0160169
Q9UQ35	S1112	-0.371101
Q9UQ35	S1124	-0.226757
Q9UQ35	S1132	-0.140618
Q9UQ35	S1179	-0.376412
Q9UQ35	S1188	-0.0836248
Q9UQ35	S1320	-0.12148
Q9UQ35	S1387	-0.0507512
Q9UQ35	S1404	0.075894
Q9UQ35	S1541	-0.390656
Q9UQ35	S1552	-0.0214286
Q9UQ35	S1925	-0.106189
Q9UQ35	S2032	-0.0472013
Q9UQ35	S2046	0.443614
Q9UQ35	S2123	-0.102339
Q9UQ35	S2132	-0.0754284
Q9UQ35	S2272	0.0559436
Q9UQ35	S2382	-0.657518
Q9UQ35	S2398	0.0071373
Q9UQ35	S2407	0.249339
Q9UQ35	S2449	0.0117695
Q9UQ35	S2581	0.565217
Q9UQ35	S2692	-0.616141
Q9UQ35	S2694	0.0480061
Q9UQ35	S2702	0.0802323
Q9UQ35	S2706	-0.099977
Q9UQ35	S295	0.0672776
Q9UQ35	S297	0.0672776
Q9UQ35	S323	-0.0747004
Q9UQ35	S351	0.0182647
Q9UQ35	S353	0.102549
Q9UQ35	S424	0.185787
Q9UQ35	S440	-0.0745924
Q9UQ35	S778	0.135867
Q9UQ35	S780	0.103486
Q9UQ35	S854	0.124116
Q9UQ35	S908	0.106262
Q9UQ35	S954	0.291535
Q9UQ35	T1003	-0.0806013
Q9UQ35	T1043	-0.0656783
Q9UQ35	T1205	-0.0950335
Q9UQ35	T1413	0.0232996
Q9UQ35	T1434	-0.129177
Q9UQ35	T1472	-0.456605
Q9UQ35	T1492	-0.208586
Q9UQ35	T1531	-0.598827
Q9UQ35	T1927	-0.0780986
Q9UQ35	T2034	-0.0152295
Q9UQ35	T2104	-0.33654
Q9UQ35	T2316	-0.434337
Q9UQ35	T2409	-0.0432805
Q9UQ35	T2599	-0.475935
Q9UQ35	T289	0.173867
Q9UQ35	T367	-0.133872
Q9UQ35	T866	-0.00534851
Q9UQ35	T903	0.106262
Q9UQ35	T983	-0.0185095
Q9Y2D5	S152	-0.271463
Q9Y2H6	S203	0.472767
Q9Y2V2	S52	-0.546888
Q9Y2V2	T45	0.321704
Q9Y2W1	S243	0.00980673
Q9Y2W1	S248	0.0721095
Q9Y2W1	S253	-0.0238743
Q9Y2W1	S310	-0.0224967
Q9Y2W1	S312	0.0524183
Q9Y2W1	S315	0.0539432
Q9Y2W1	S320	0.00693591
Q9Y2W1	S379	0.182416
Q9Y2W1	S682	-0.0453881
Q9Y2W1	S698	0.0102723
Q9Y2W1	Y293	-0.599524
Q9Y385	S266	-0.233375
Q9Y388	S188	0.449611
Q9Y3L3	S544	0.321766
Q9Y3T9	S49	-0.00890336
Q9Y3T9	S56	-0.181342
Q9Y3Z3	T592	-1.14586
Q9Y478	S182	0.454446
Q9Y490	S2040	0.524486
Q9Y490	S981	0.247632
Q9Y4A5	S2077	-0.554572
Q9Y4A5	T1622	0.203472
Q9Y4E8	S229	-0.114865
Q9Y4F1	S23	0.252664
Q9Y4F1	S427	-0.238959
Q9Y520	S2105	0.149269
Q9Y5S2	S1690	0.0898526
Q9Y618	S2258	-0.574291
Q9Y6D5	S218	0.297881
Q9Y6D5	S227	-0.270602
Q9Y6D5	S277	-0.331365
Q9Y6D6	S52	-0.0422874
Q9Y6R9	T285	0.67324
Q9Y6X9	S615	-0.292341
